# Supplementary material
Source: HighWire-hosted journal article supplement (doi:10.1101/rna.079863.123)
Supplement: Supplemental_Material.pdf [file Supplemental_Material.pdf]

Supplemental Figure 1, related to Figure 1

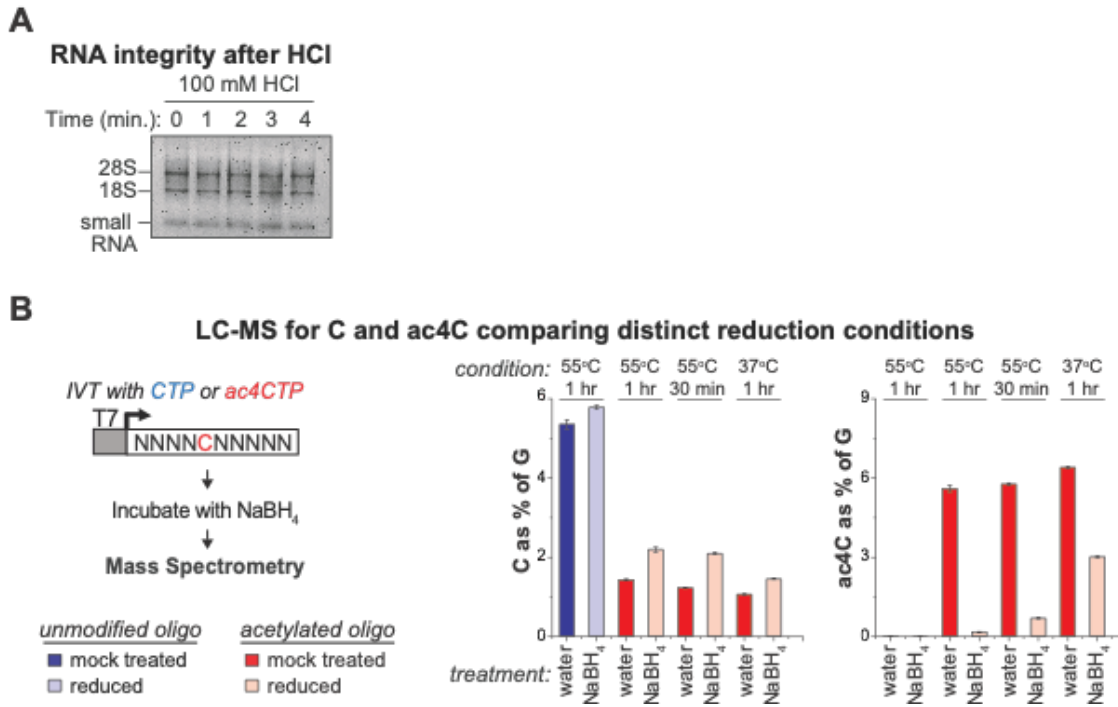

**Figure S1. Optimization of reaction conditions used to chemically reduce ac4C.** (A) Agarose gel analysis of total RNA integrity after exposure to the concentration of HCl used in NaCNBH<sub>3</sub> reduction (100 mM) for the indicated times. (B) Mass spectrometric analysis of C and ac4C levels in an RNA oligo containing a single ac4C after reduction with NaBH<sub>4</sub> under the specified reaction conditions. An unmodified RNA oligo with a single C serves as control. Data represent the Mean  $\pm$  SD as a percent of detected guanosine,  $n = 3$ .

Supplemental Figure 2, related to Figure 2

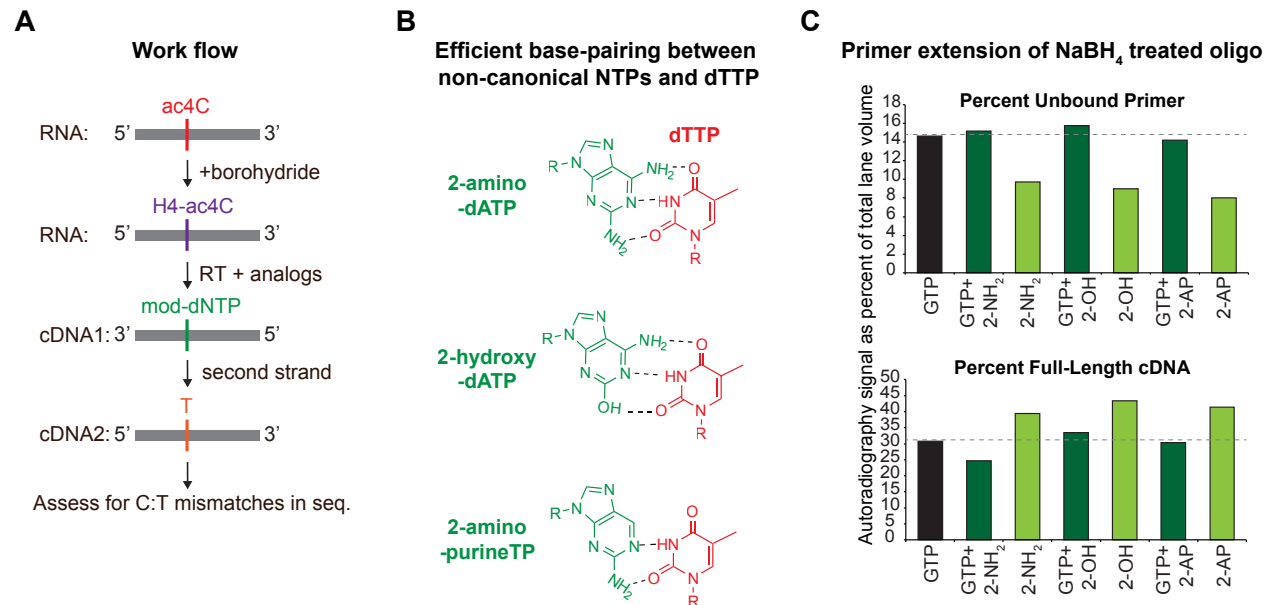

**Figure S2. Non-canonical NTPs with base-pairing features that complement tetrahydro-ac4C improve cDNA synthesis through reduced ac4C.** (A) Workflow schematic. (B) Base-pairing predictions support robust binding between non-canonical NTPs and dTTP during second strand cDNA synthesis. (C) Quantification of the primer extension results from NaBH<sub>4</sub>-treated RNA from Figure 2D comparing the signal intensity associated with unincorporated primer or full-length cDNA as a percent of total lane volume. Volumes were derived from identically sized boxes in ImageQuant. 2-NH<sub>2</sub> = 2-amino-dATP; 2-OH = 2-hydroxy-dATP; 2-AP = 2-aminopurineTP.

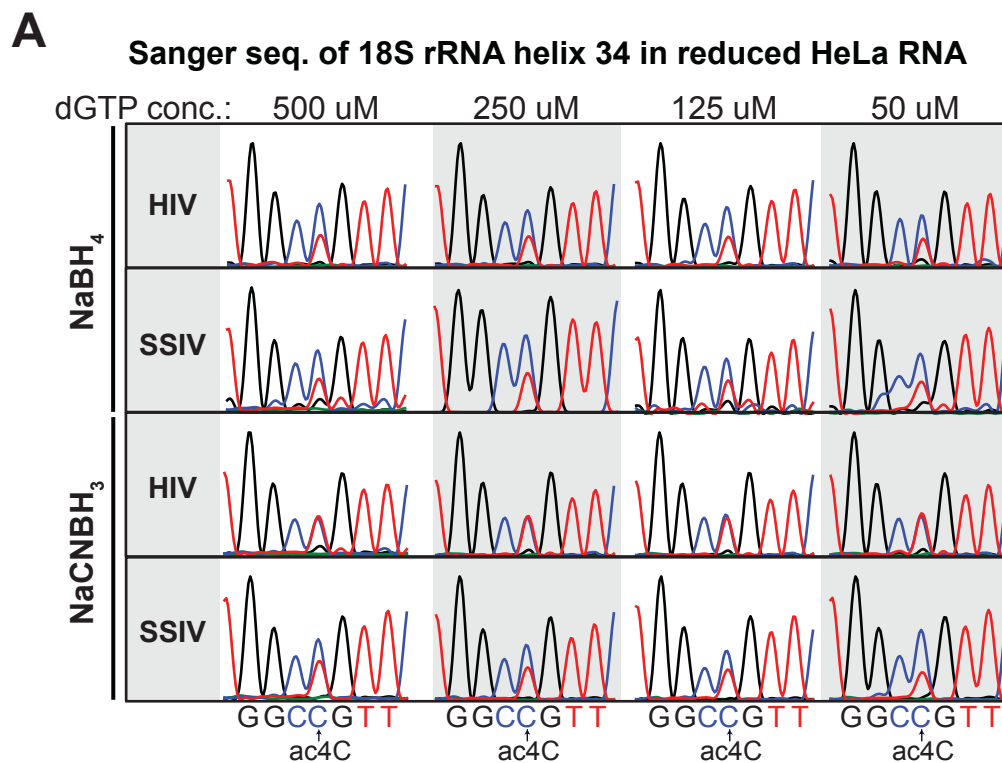

**Figure S3. Limiting dGTP in cDNA synthesis is insufficient to reach high C:T mismatch levels at reduced ac4C sites. (A)** Sanger sequencing traces of RT-PCR amplicons surrounding the ac4C site in 18S rRNA helix 34 from NaBH<sub>4</sub> and NaCNBH<sub>3</sub> reduced HeLa RNA reverse transcribed with HIV and SSIV RTases and decreasing concentrations of dGTP, corresponding to Figure 3C.

Supplemental Figure 4, related to Figure 4

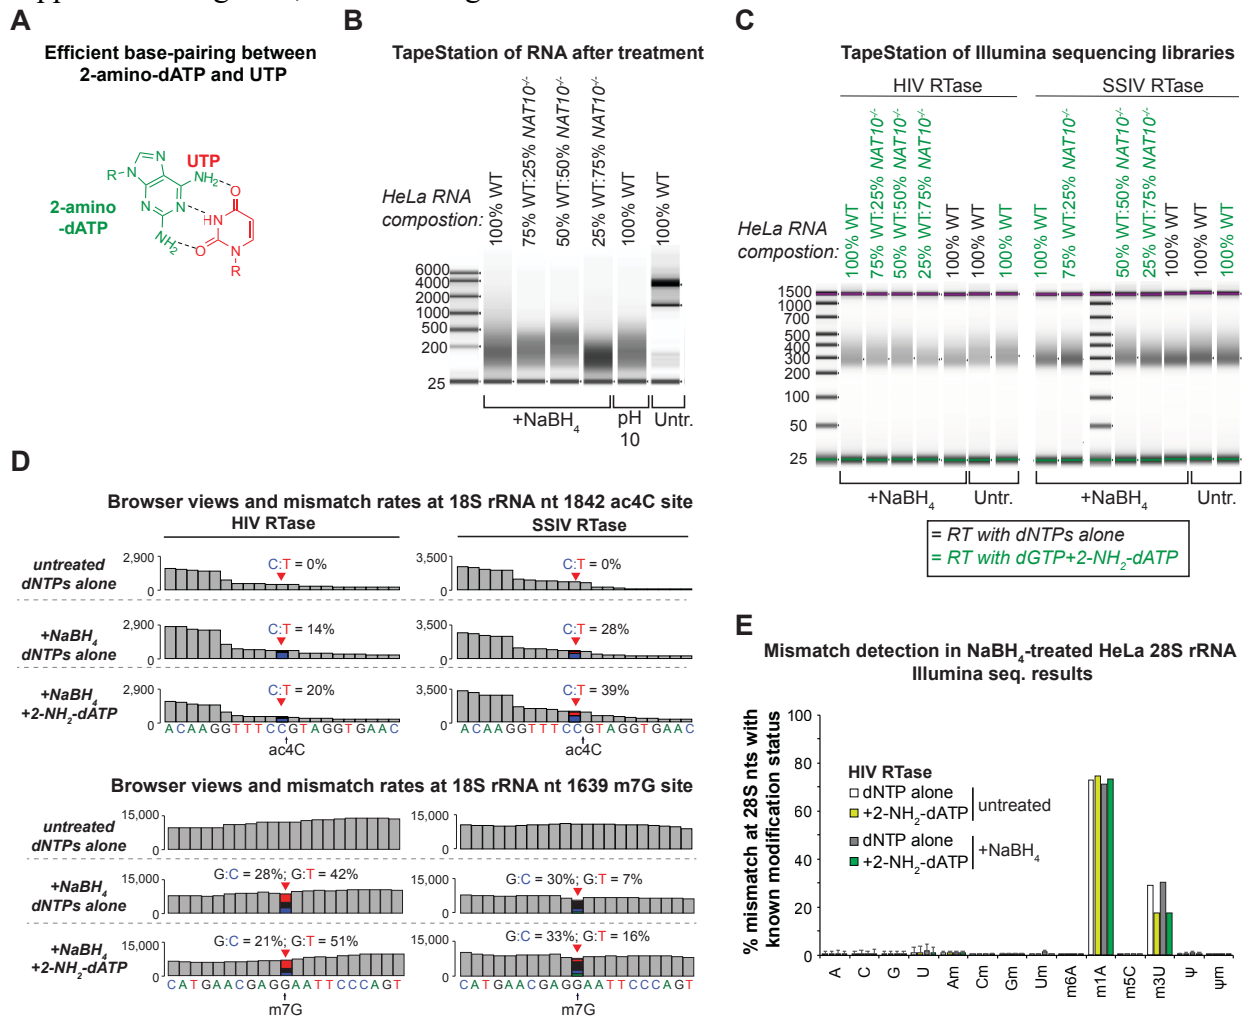

**Figure S4. Assessing the specificity of RetraC:T for ac4C through Illumina sequencing.** (A) Scheme depicting the base-pairing properties between 2-amino-dATP and UTP. The unnatural nucleotide can form three hydrogen bonds and be incorporated opposite of U in first strand cDNA synthesis. (B) Agilent TapeStation analysis after exposure of wildtype and *NAT10*<sup>-/-</sup> RNA in mixtures, as indicated, to NaBH<sub>4</sub>-treatment or pH-matched control. Untreated (untr.) wildtype HeLa RNA is shown for comparison. (C) Agilent TapeStation analysis of cDNA libraries generated from the RNA in (B) through a custom reverse transcription pipeline with either HIV or SSV RTases in the presence of the canonical dNTPs (black) or a mixture in which the dGTP component has been replaced with 25% dGTP:75% 2-NH<sub>2</sub>-dATP (green). Untreated indicates pH-matched control. Library preparation was achieved through the NEBNext Ultra II Directional RNA library for Illumina kit. (D) Browser views surrounding the ac4C site at 18S nt 1842 and the m7G site at 18S nt 1639 from sequencing of untreated or NaBH<sub>4</sub>-treated RNA reverse transcribed in the presence of 2-amino-dATP or dNTPs alone, as shown. C:T mismatches are depicted in red. (E) Cumulative mismatch rates from sequencing of untreated or NaBH<sub>4</sub>-treated RNA reverse transcribed in the presence of 2-amino-dATP or dNTPs alone, derived from each of the 5064 nts in 28S rRNA and segregated by modification status.

Supplemental Figure 5, related to Figure 5

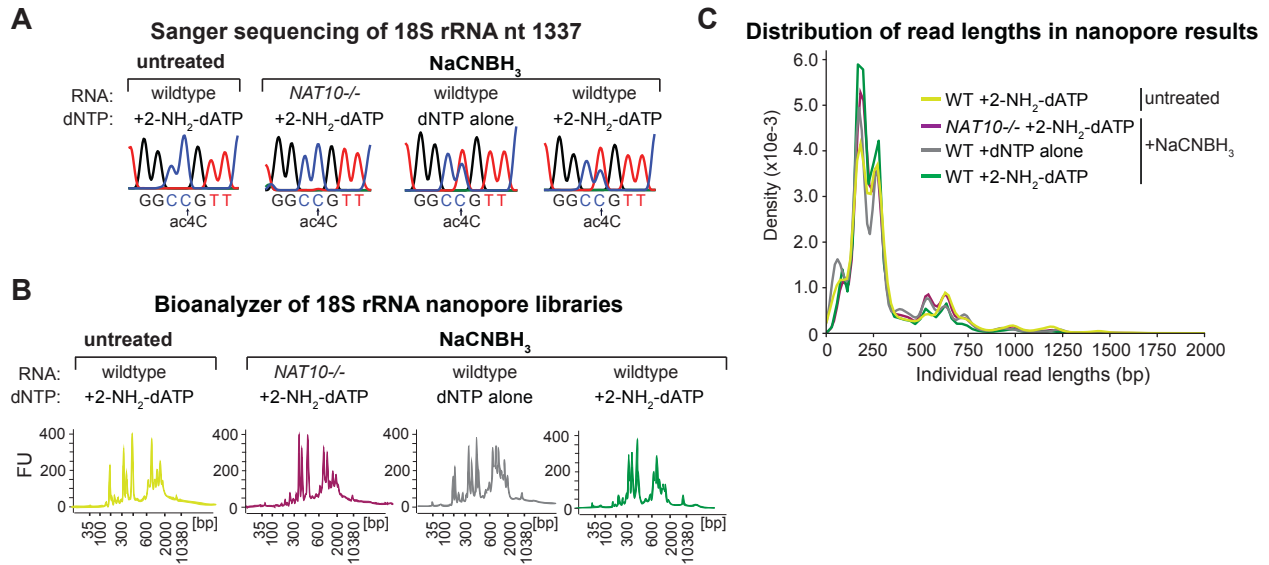

**Figure S5. Assessing the specificity of RetraC:T for ac4C through nanopore sequencing. (A)** Sanger sequencing traces surrounding the 18S rRNA helix 34 ac4C site at nt 1337 after NaCNBH<sub>3</sub> reduction of wildtype and *NAT10*<sup>-/-</sup> HeLa RNA and reverse-transcription with HIV RTase +/- 2-amino-dATP, as shown. **(B)** High sensitivity DNA bioanalyzer analysis of Nanopore-PCR libraries of purified 18S PCR products generated from the RT reactions from (A). **(C)** Distribution of read lengths from nanopore sequencing of 18S rRNA libraries from (B).
