# Supplementary material
Source: HighWire-hosted journal article supplement (doi:10.1101/rna.079863.123)
Supplement: Supplemental_Table1.xlsx [file Supplemental_Table1.xlsx]

## Sheet: ac4C
	N4-Acetylcytidine Results		Qualifier (286.1 -> 112.0) Results	N4-Acetylcytidine-13C5 (ISTD) Results		Qualifier (291.1 -> 112.0) Results
	RT	Resp.	Ratio	RT	Resp.	Ratio	A(ac4C)/A(ac4C*)	n(ac4C)/n(ac4C*)	n(ac4C) [fmol]
Blank1	7.69967	496.849	403.498	7.59543	6.08986e+07	93.7172	8.15863e-06	0.000194343	0.227382
Blank2	7.57072	621.41	29.6532	7.58683	5.8658e+07	93.1924	1.05938e-05	0.000196901	0.230374
Blank3	7.55353	925.68	162.008	7.56965	5.72437e+07	93.4605	1.61709e-05	0.000202759	0.237228
C Untr	7.57073	9197.71	78.8515	7.56105	5.59213e+07	93.7317	0.000164476	0.000358537	0.419488
	7.55353	7981.98	114.749	7.56105	5.62864e+07	94.1861	0.00014181	0.000334729	0.391633
	7.54493	8508.31	94.7689	7.53527	5.67014e+07	93.673	0.000150055	0.000343389	0.401765
C NaBH4	7.57072	1118.3	97.8712	7.55245	5.39429e+07	93.1926	2.07312e-05	0.000207549	0.242833
	7.52775	7688.13	69.4695	7.54385	5.51116e+07	92.5501	0.000139501	0.000332304	0.388796
	7.55353	1877.08	32.4983	7.53527	5.51681e+07	93.0022	3.40247e-05	0.000221513	0.25917
C NaBH3CN	7.56213	1849.3	39.2636	7.54385	5.40991e+07	93.068	3.41836e-05	0.00022168	0.259365
	7.54493	1809.31	51.5817	7.53527	5.4525e+07	92.6618	3.31831e-05	0.000220629	0.258135
	7.54493	2139.27	15.3424	7.54385	5.42485e+07	92.4986	3.94346e-05	0.000227195	0.265818
ac4C Untr	7.52775	4.01181e+07	92.319	7.52667	5.19105e+07	91.6773	0.772832	0.811959	949.992
	7.54493	3.79937e+07	92.0701	7.54385	5.28527e+07	92.5552	0.71886	0.755267	883.663
	7.54493	3.72991e+07	91.5721	7.54385	5.192e+07	93.3983	0.718395	0.754779	883.091
ac4C NaBH4	7.52775	2.22951e+06	90.5129	7.52667	5.03354e+07	93.2257	0.0442931	0.0467106	54.6514
	7.52775	2.36081e+06	90.399	7.52667	5.30975e+07	92.9083	0.0444617	0.0468878	54.8587
	7.55353	2.01273e+06	91.1345	7.55245	5.21526e+07	93.1466	0.038593	0.0407234	47.6463
ac4C NaBH3CN	7.52775	3.46273e+06	92.3283	7.52667	5.08693e+07	92.1789	0.0680711	0.0716868	83.8735
	7.52775	3.30598e+06	92.0408	7.52667	5.2387e+07	92.1564	0.0631069	0.0664724	77.7727
	7.52775	3.32785e+06	89.282	7.52667	5.22074e+07	91.8945	0.063743	0.0671405	78.5544
Blank1	7.62718	304.397		7.65842	3.56759e+07	91.5209	8.53229e-06	0.000194736	0.227841
Blank2	7.66083	3677.96	74.3691	7.6416	3.33009e+07	91.9222	0.000110446	0.000301785	0.353088
Blank3	7.62718	711.928		7.6416	3.20287e+07	91.612	2.22278e-05	0.000209121	0.244672
C Untr 55C, 1h	7.65243	22057.2	89.4508	7.65002	3.0491e+07	92.4231	0.000723398	0.000945622	1.10638
	7.66083	25405.1	76.7019	7.65002	2.99277e+07	91.5949	0.000848882	0.00107743	1.26059
	7.66083	24313.4	84.9867	7.65	2.92894e+07	91.7381	0.000830109	0.00105771	1.23752
C NaBH4, 55C, 1h	7.64402	1974.95	99.2749	7.6416	2.87931e+07	91.5819	6.85913e-05	0.000257821	0.30165
	7.65242	2044.72	83.8539	7.6416	2.82922e+07	91.557	7.22715e-05	0.000261687	0.306173
	7.68607	1951.6	97.1835	7.65842	2.80437e+07	91.3652	6.95915e-05	0.000258872	0.30288
ac4C Untr 55C, 1h	7.65243	4.19178e+07	91.0481	7.65843	2.73983e+07	90.7569	1.52994	1.60722	1880.45
	7.65242	4.15337e+07	91.5357	7.65	2.6868e+07	91.1426	1.54584	1.62392	1899.98
	7.65242	4.08165e+07	91.1499	7.65	2.61592e+07	91.7233	1.56031	1.63912	1917.77
ac4C NaBH4 55C, 1h	7.65242	1.50937e+06	90.303	7.65	2.64138e+07	91.3491	0.0571435	0.0602085	70.444
	7.65243	1.52356e+06	90.7377	7.65002	2.65495e+07	91.275	0.0573856	0.0604628	70.7415
	7.644	1.49093e+06	90.3419	7.65	2.59996e+07	92.0384	0.0573445	0.0604197	70.6911
ac4C Untr 55C, 30min	7.66083	2.68158e+07	90.4782	7.65842	2.59026e+07	91.5293	1.03525	1.0876	1272.49
	7.65243	2.68452e+07	90.9022	7.65002	2.55721e+07	91.0564	1.04978	1.10286	1290.35
	7.65242	2.67784e+07	91.0353	7.65	2.53e+07	91.0667	1.05844	1.11195	1300.99
ac4C NaBH4 55C, 30min	7.65243	4.04687e+06	90.7912	7.65002	2.55464e+07	91.6394	0.158412	0.16658	194.899
	7.65242	4.06611e+06	90.0669	7.65	2.53734e+07	91.4104	0.16025	0.168511	197.158
	7.65242	4.04798e+06	90.4217	7.65	2.53873e+07	91.409	0.159449	0.167669	196.173
ac4C Untr 37C, 1h	7.65242	3.28836e+07	90.638	7.65	2.50257e+07	91.3205	1.31399	1.38038	1615.05
	7.65243	3.2523e+07	90.4901	7.65002	2.44029e+07	91.2563	1.33275	1.40009	1638.1
	7.66085	3.24917e+07	90.6506	7.65843	2.45417e+07	90.5902	1.32394	1.39084	1627.28
ac4C NaBH4 37C, 1h	7.65242	2.64283e+07	91.1452	7.65002	2.41117e+07	91.4865	1.09608	1.1515	1347.25
	7.66083	2.68532e+07	90.9413	7.65842	2.43898e+07	90.8789	1.10101	1.15667	1353.3
	7.65242	2.6507e+07	90.9901	7.65	2.40389e+07	91.1018	1.10267	1.15841	1355.34

## Sheet: Cytidine
	Cytidine Results		Cytidine-13C5 (ISTD) Results
	RT	Resp.	RT	Resp.	A(Cytidine)/A(Cytidine*)	n(Cytidine)/n(Cytidine*)	n(Cytidine) [fmol]		Corrected A(Cytidine)	A(Cytidine)/A(Cytidine*)	n(Cytidine)/n(Cytidine*)	n(Cytidine) [fmol]
Blank1	1.85103	156725	1.85053	6.74416e+06	0.0232387	0.0176016	20.5939		141317
Blank2	1.85963	123566	1.85913	5.78196e+06	0.021371	0.0161766	18.9267
Blank3	1.85103	143658	1.85053	5.70568e+06	0.0251781	0.0190814	22.3252
C Untr	1.85103	6.34079e+06	1.85053	5.2999e+06	1.1964	0.912706	1067.87		6.19948e+06	1.16973	0.892362	1044.06
	1.85103	6.24037e+06	1.85053	5.34283e+06	1.16799	0.891031	1042.51		6.09906e+06	1.14154	0.87085	1018.89
	1.85103	6.40927e+06	1.85053	5.5936e+06	1.14582	0.874117	1022.72		6.26795e+06	1.12056	0.854841	1000.16
C NaBH4	1.85103	9.28296e+06	1.85053	5.29347e+06	1.75366	1.33789	1565.33		9.14164e+06	1.72697	1.31752	1541.5
	1.85103	9.01636e+06	1.85053	5.23449e+06	1.72249	1.31411	1537.5		8.87504e+06	1.69549	1.29351	1513.4
	1.85103	8.2669e+06	1.85053	5.2194e+06	1.58388	1.20835	1413.77		8.12558e+06	1.5568	1.18769	1389.6
C NaBH3CN	1.85103	8.19587e+06	1.85053	5.14692e+06	1.59238	1.21484	1421.36		8.05456e+06	1.56493	1.19389	1396.85
	1.85103	8.42075e+06	1.85053	5.41288e+06	1.55569	1.18684	1388.6		8.27944e+06	1.52958	1.16692	1365.3
	1.85103	8.19852e+06	1.85053	5.32818e+06	1.53871	1.17388	1373.44		8.0572e+06	1.51218	1.15365	1349.77
ac4C Untr	1.85103	914978	1.85053	4.96165e+06	0.18441	0.140573	164.471		773662	0.155928	0.118842	139.045
	1.85103	852283	1.85053	5.12459e+06	0.166313	0.126765	148.315		710967	0.138736	0.105725	123.698
	1.85103	885542	1.85053	4.87314e+06	0.181719	0.13852	162.068		744226	0.15272	0.116394	136.181
ac4C NaBH4	1.85103	3.68401e+06	1.84195	4.93986e+06	0.745771	0.568884	665.594		3.54269e+06	0.717164	0.547057	640.057
	1.85103	3.33069e+06	1.85053	5.05725e+06	0.658597	0.502371	587.774		3.18937e+06	0.630653	0.48105	562.829
	1.85103	3.17591e+06	1.85053	5.03002e+06	0.63139	0.481613	563.487		3.03459e+06	0.603295	0.460177	538.407
ac4C NaBH3CN	1.85103	1.27744e+06	1.85053	5.01998e+06	0.254471	0.194029	227.014		1.13612e+06	0.226321	0.17255	201.884
	1.84245	1.19401e+06	1.85053	4.83338e+06	0.247035	0.188355	220.375		1.0527e+06	0.217797	0.166047	194.275
	1.85103	1.16506e+06	1.85053	4.82771e+06	0.241329	0.184001	215.281		1.02375e+06	0.212057	0.161667	189.15
Blank1	1.89372	88868.1	1.89255	1.11057e+07	0.00800199	0.00597626	6.99223		243419
Blank2	1.89372	450946	1.89255	1.01138e+07	0.0445872	0.0338903	39.6516
Blank3	1.89372	190442	1.89255	9.59403e+06	0.01985	0.0150161	17.5689
C Untr 55C, 1h	1.8853	1.87351e+07	1.89255	9.42523e+06	1.98776	1.5165	1774.31		1.85937e+07	1.97276	1.50506	1760.92
	1.89372	1.84867e+07	1.89255	9.24634e+06	1.99935	1.52535	1784.65		1.83453e+07	1.98407	1.51369	1771.01
	1.8853	1.66934e+07	1.88413	8.59974e+06	1.94115	1.48094	1732.7		1.65521e+07	1.92472	1.46841	1718.03
C NaBH4, 55C, 1h	1.8853	2.32626e+07	1.88413	8.83363e+06	2.63341	2.00912	2350.68		2.31212e+07	2.61741	1.99692	2336.39
	1.8853	2.27405e+07	1.88413	8.60562e+06	2.64252	2.01608	2358.81		2.25992e+07	2.6261	2.00355	2344.15
	1.8853	2.2175e+07	1.89255	8.52351e+06	2.60163	1.98488	2322.31		2.20337e+07	2.58505	1.97223	2307.51
ac4C Untr 55C, 1h	1.8853	4.81691e+06	1.88413	8.42075e+06	0.572028	0.43632	510.495		4.67559e+06	0.555246	0.423516	495.514
	1.8853	4.70476e+06	1.88413	8.16136e+06	0.576467	0.439707	514.457		4.56344e+06	0.559152	0.426496	499
	1.8853	4.58058e+06	1.88413	7.95506e+06	0.575807	0.439204	513.868		4.43926e+06	0.558043	0.42565	498.01
ac4C NaBH4 55C, 1h	1.8853	7.67239e+06	1.88413	7.82231e+06	0.980834	0.748234	875.433		7.53108e+06	0.962768	0.73445	859.306
	1.89372	7.79666e+06	1.89255	7.85627e+06	0.992413	0.757068	885.769		7.65535e+06	0.974425	0.743343	869.712
	1.8853	7.76745e+06	1.88413	7.84613e+06	0.989973	0.755206	883.591		7.62614e+06	0.971962	0.741464	867.513
ac4C Untr 55C, 30min	1.8853	2.68875e+06	1.88413	8.05578e+06	0.333766	0.25453	297.8		2.54743e+06	0.316224	0.241145	282.14
	1.8853	2.66368e+06	1.88413	7.80855e+06	0.341123	0.260143	304.368		2.52236e+06	0.323026	0.246335	288.212
	1.8853	2.67802e+06	1.88413	7.8164e+06	0.342616	0.261282	305.7		2.5367e+06	0.324536	0.247487	289.56
ac4C NaBH4 55C, 30min	1.8853	5.16569e+06	1.88413	7.35912e+06	0.701943	0.535444	626.469		5.02437e+06	0.68274	0.520792	609.327
	1.8853	5.17393e+06	1.88413	7.52731e+06	0.687354	0.524312	613.446		5.03261e+06	0.66858	0.509988	596.686
	1.8853	5.17463e+06	1.88413	7.37993e+06	0.701175	0.534858	625.784		5.03331e+06	0.682027	0.520248	608.69
ac4C Untr 37C, 1h	1.8853	2.47484e+06	1.88413	7.3673e+06	0.335923	0.256175	299.725		2.33352e+06	0.316741	0.24154	282.602
	1.8853	2.42314e+06	1.88413	7.16511e+06	0.338185	0.257902	301.745		2.28182e+06	0.318463	0.242853	284.138
	1.8853	2.4342e+06	1.88413	7.18253e+06	0.338906	0.258451	302.388		2.29288e+06	0.319231	0.243439	284.824
ac4C NaBH4 37C, 1h	1.87688	5.36525e+06	1.88413	7.06855e+06	0.759031	0.579001	677.431		5.22393e+06	0.739039	0.563747	659.584
	1.8853	5.52066e+06	1.88413	7.16704e+06	0.770284	0.587587	687.477		5.37934e+06	0.750567	0.572543	669.875
	1.87688	5.44961e+06	1.88413	7.17135e+06	0.759915	0.579675	678.22		5.3083e+06	0.740209	0.56464	660.629

## Sheet: Guanosine
	UV-G Results
	RT	Resp.	n(Guanosine) [pmol]
Blank1	5.05198	0.304627	0.190805
Blank2	5.02032	0.550178	0.310266
Blank3	5.02032	0.469035	0.270789
C Untr	4.94865	54.6655	26.6375
	4.94865	54.2979	26.4587
	4.95385	54.3869	26.5019
C NaBH4	4.95718	82.6416	40.2479
	4.95218	79.6608	38.7977
	4.95385	77.5201	37.7563
C NaBH3CN	4.95385	72.3069	35.2201
	4.95885	71.7525	34.9503
	4.95407	72.4057	35.2681
ac4C Untr	4.9574	45.4316	22.1452
	4.95907	43.552	21.2307
	4.96073	43.0504	20.9867
ac4C NaBH4	4.96073	75.0826	36.5704
	4.96407	71.0265	34.5971
	4.96073	70.0105	34.1029
ac4C NaBH3CN	4.96093	68.0156	33.1324
	4.96593	65.147	31.7368
	4.96927	63.2998	30.8381
Blank1	5.26157	0.289738	0.183561
Blank2	5.24468	0.194168	0.137066
Blank3	5.25635	0.343931	0.209926
C Untr 55C, 1h	5.08802	67.9221	33.0868
	5.09468	65.9182	32.1119
	5.09157	66.3638	32.3287
C NaBH4, 55C, 1h	5.0949	83.0336	40.4386
	5.0949	82.0924	39.9807
	5.10157	81.9656	39.919
ac4C Untr 55C, 1h	5.10323	70.2617	34.2251
	5.10302	70.0063	34.1008
	5.10157	68.6795	33.4553
ac4C NaBH4 55C, 1h	5.09657	80.0075	38.9664
	5.09157	81.9907	39.9312
	5.10823	77.7343	37.8605
ac4C Untr 55C, 30min	5.11323	45.6794	22.2657
	5.10823	45.6409	22.247
	5.1049	46.0473	22.4447
ac4C NaBH4 55C, 30min	5.10823	59.013	28.7526
	5.10657	57.5195	28.0259
	5.10657	57.5618	28.0465
ac4C Untr 37C, 1h	5.11157	51.6789	25.1845
	5.1099	52.8529	25.7556
	5.11323	51.8983	25.2912
ac4C NaBH4 37C, 1h	5.12157	91.1255	44.3753
	5.12157	93.0121	45.2932
	5.1199	91.7146	44.6619

## Sheet: ValueList_Helper
Sample
Blank
Cal
QC
CC
DoubleBlank
MatrixSpike
MatrixSpikeDup
MatrixBlank
TuneCheck
ResponseCheck
