# Supplementary material
Source: HighWire-hosted journal article supplement (doi:10.1101/rna.079863.123)
Supplement: Supplemental_Table2.xlsx [file Supplemental_Table2.xlsx]

## Sheet: Sheet1
C:T mismatches from Sanger Sequencing
NaCNBH3 Treated / Non-Treated (%)	dNTP C:T mismatch at ac4C (%)	2-amino-dATP C:T mismatch at ac4C (%)
0	0	0
1	0	0
2	0	0.95
5	0	4.19
10	0	5.73
25	5.7	26.7
50	24.73	55.81
100	46.19	96.67
