# Supplementary material
Source: HighWire-hosted journal article supplement (doi:10.1101/rna.079863.123)
Supplement: Supplemental_Table3.xlsx [file Supplemental_Table3.xlsx]

## Sheet: Sheet1
HeLa RNA	treatment	dNTP	RTase	Total reads	18srRNA mapped	28srRNA mapped
wildtype	untreated	dNTPs	HIV	4312559	0.2294	0.6657
wildtype	untreated	2-amino-dATP	HIV	4408959	0.2517	0.6485
wildtype	NaBH4	dNTPs	SSIV	3658878	0.2649	0.6502
wildtype	NaBH4	dNTPs	HIV	5285926	0.2264	0.6466
wildtype	NaBH4	2-amino-dATP	HIV	4415939	0.2429	0.6633
75%WT/25%NAT10-/-	NaBH4	2-amino-dATP	HIV	4696266	0.2379	0.6546
50%WT/50%NAT10-/-	NaBH4	2-amino-dATP	HIV	4057393	0.2393	0.6464
25%WT/75%NAT10-/-	NaBH4	2-amino-dATP	HIV	3830148	0.2277	0.6657
wildtype	untreated	dNTPs	SSIV	3978025	0.2585	0.6531
wildtype	untreated	2-amino-dATP	SSIV	4437064	0.2521	0.6522
wildtype	NaBH4	2-amino-dATP	SSIV	4460824	0.2528	0.6571
75%WT/25%NAT10-/-	NaBH4	2-amino-dATP	SSIV	4469612	0.2469	0.6509
50%WT/50%NAT10-/-	NaBH4	2-amino-dATP	SSIV	4865019	0.2329	0.6494
25%WT/75%NAT10-/-	NaBH4	2-amino-dATP	SSIV	4298861	0.2385	0.6332
