# Supplementary material
Source: HighWire-hosted journal article supplement (doi:10.1101/rna.079863.123)
Supplement: Supplemental_Table4.xlsx [file Supplemental_Table4.xlsx]

## Sheet: A>C
18s location	forward strand reference base	WT NaBH4 2-NH2-d-ATP HIV	75% WT NaBH4 2-NH2-d-ATP HIV	50% WT NaBH4 2-NH2-d-ATP HIV	25% WT NaBH4 2-NH2-d-ATP HIV	WT untreated 2-NH2-d-ATP HIV	WT untreated dNTPs HIV	WT NaBH4 d2-NH2-d-ATP SSIV	75% WT NaBH4 dNH2-ATP SSIV	50% WT NaBH4 2-NH2-d-ATP SSIV	25% WT NaBH4 2-NH2-d-ATP SSIV	WT untreated 2-NH2-d-ATP SSIV	WT untreated dNTPs SSIV	WT NaBH4 dNTPs HIV	WT NaBH4 dNTPs SSIV
2	A	3.33333	3.7037	10.3448	7.69231	2.5	15.7895	16.6667	42.8571	0	16.6667	0	0	5.26316	25
11	A	0.675676	1.63043	0.253807	0.763359	0	1.75439	1.37931	0.666667	0.409836	0.806452	0	0	1.3468	0
19	A	0.074239	0.0735294	0.0743494	0.105708	0.132188	0.265957	0.282486	0.0642777	0.155226	0.0375023	0.131406	0.193317	0.126103	0.236897
22	A	0	0	0	0	0	0	0.0297708	0.0289143	0	0	0.0146628	0	0.200602	0
25	A	0	0	0	0.0841751	0	0	0.0138773	0.0134862	0.0141743	0.0151332	0.0275406	0	0	0.0232937
27	A	0	0.0576701	0	0	0.0539084	0	0	0	0	0	0	0	0.0811688	0
38	A	0	0.0412541	0	0	0	0	0.00893416	0	0.00956389	0.0192308	0.0265487	0.0217533	0.231054	0.0336511
39	A	0	0	0	0.0581734	0	0	0.00892379	0	0	0	0.00883861	0.0108625	0.138568	0
40	A	0	0	0.0909091	0	0	0	0	0.0172488	0.00953743	0.00958589	0	0.0108331	0	0
42	A	0	0	0	0	0	0	0.00852733	0	0.00918611	0	0	0.0102923	0	0
45	A	0	0	0	0	0.0379939	0.0947418	0	0.0241857	0.00892459	0.00887548	0	0.0101225	0.265957	0
46	A	0	0	0	0	0.0757863	0	0	0.0482664	0.0178126	0	0	0.0202122	0.177148	0.0520562
50	A	0.104239	0.152672	0	0.0536193	0.074599	0.0924642	0.00775494	0	0.00843882	0	0.0157295	0.0191223	0.0431034	0.0196329
54	A	0	0.0739645	0	0.208008	0.0361795	0	0.00746491	0.0148126	0	0.016009	0.00761499	0	0.0829876	0
60	A	0.0313775	0	0	0	0.103699	0.0424088	0	0	0	0	0.00720513	0	0.039032	0
61	A	0.0943396	0	0	0.0488998	0	0.0424268	0	0	0.00769468	0.00749794	0.00719942	0.00857265	0	0
64	A	0.0959693	0	0	0.100604	0	0.342906	0.0140865	0.0070028	0.0307243	0	0.0143658	0.0340861	0	0.0175824
68	A	0.189215	0.318584	0.344086	0.779347	0.254638	1.12829	0.0138485	0	0.0151297	0.0146306	0.0211655	0.0334308	0.903378	0.051809
77	A	0.0283206	0.0315557	0.038956	0.160256	0.0328947	0.103484	0	0	0	0.00950841	0	0.0103199	0.126422	0
79	A	0.0580215	0.0323834	0	0.0818331	0.102389	0	0.0100776	0.0102051	0.011121	0	0.0102407	0.0104308	0	0.0213038
83	A	0.0256871	0	0	0	0	0	0.0101854	0	0	0	0.0203625	0	0	0
84	A	0	0	0	0	0	0.0611434	0.0310495	0.0417624	0.0345981	0.0408747	0.0206441	0.111134	0.0291545	0.0738007
85	A	0.0517331	0	0.146735	0	0	0.0630318	0	0.0105865	0.0117014	0.0103423	0.0104341	0	0.0596481	0
91	A	0.063358	0.0226809	0	0	0.0487448	0	0	0	0	0	0	0	0	0
92	A	0.063012	0.0225836	0	0.0296912	0.0242189	0.027571	0	0.0116171	0	0	0.0112385	0	0.0275179	0
99	A	0.0166417	0.0169866	0	0.023084	0	0.0512295	0	0	0.0140036	0	0.0129032	0	0.132979	0
102	A	0.0163452	0.016581	0	0	0	0.0247097	0	0	0	0.0256772	0	0	0	0
103	A	0	0	0	0	0	0.0243309	0.0142857	0	0	0	0.0134282	0	0	0.0309215
104	A	0	0	0.0214592	0	0	0	0.0280544	0.0141884	0	0	0.0131165	0	0	0.0150898
107	A	0	0	0	0	0	0	0	0.011288	0	0.010543	0	0	0	0
111	A	0.0143493	0.0291503	0	0.0198334	0	0	0	0.010929	0.0118892	0	0	0	0.0226142	0.0131268
141	A	0.0371793	0.0376932	0.0481078	0.0511945	0.0372532	0.0382336	0.0636841	0.0640666	0.0277469	0.0564789	0.04693	0.057241	0.0586969	0.0748183
147	A	0.0131891	0.0133726	0.0168492	0.0180865	0	0.0417449	0.00798403	0.0243427	0.0939232	0.0409903	0.0559374	0.0240993	0.020803	0.0224341
149	A	0.0136333	0.0138793	0.0173883	0.0186498	0	0.0656168	0.00806387	0.0164177	0.0285878	0	0.0322893	0.0489896	0.0213447	0.0342466
150	A	0.0136687	0.0139334	0	0.0748083	0.0138313	0.043985	0.00807885	0.0164474	0	0.00830565	0.0242581	0.0122926	0.0214133	0.0459137
158	A	0	0.0151561	0	0.0605571	0	0	0.0396385	0.0326078	0.0563698	0.025495	0.0161956	0.0723415	0.0221926	0.0229938
159	A	0	0	0	0.021263	0	0.0708048	0.00801154	0.00822707	0	0.00859697	0.00818197	0.0122941	0.0467181	0
164	A	0.0292997	0	0	0	0.0746491	0	0.0465622	0.00795925	0.0364731	0.0340832	0.0397014	0.0223489	0	0.0220921
166	A	0.0426985	0.0145964	0	0	0.0142552	0.0246488	0.0439676	0.0798722	0.0995124	0.0486287	0.0618648	0.0610352	0.0264271	0.0253518
170	A	0.0415685	0.0423191	0.017584	0.0386623	0.0135355	0.0243072	0.232062	0.196409	0.113507	0.258291	0.111742	0.0484614	0.0262192	0.0503588
171	A	0.0140115	0.0142674	0.0177588	0	0.0137005	0.0491884	0.0189861	0.00956846	0.0314994	0.0105843	0.00950209	0	0	0.0127178
173	A	0.0139005	0.0285878	0	0.0389029	0.0138026	0.0248016	0.0188947	0	0.0311624	0.0211439	0.00949848	0.0121921	0.0539811	0.0126199
175	A	0.027651	0.0142918	0.0181324	0.0191828	0.0279799	0.0744232	0.018534	0.0468911	0.11213	0.0104069	0.037534	0	0.26062	0.0122474
181	A	0.228513	0.317334	0.382077	0.344293	0.280711	1.10684	0.511915	0.558164	0.578736	0.50388	0.406289	0.563747	2.37629	0.481541
191	A	0.119653	0.242388	0.290698	0.186081	0.178864	0.308422	0.106781	0.107817	0.101678	0.123138	0.0836033	0.0792393	0.248016	0.113293
209	A	0.0116387	0.0223065	0.0540468	0.0574878	0	0.093882	0.0103734	0.0412882	0.0460236	0.0240096	0.0390054	0.0409458	0.0803859	0.011919
217	A	0.0107481	0.0102722	0.048727	0.013113	0.0604473	0.088574	0.0203791	0.019972	0.00858738	0.0468274	0.0467377	0.0101163	0.0830663	0.0120077
221	A	0	0.0305344	0.0477555	0.0386498	0.0301538	0.129552	0.0514562	0.0303	0.0771208	0.0472981	0.0849457	0.0204666	0.132509	0.0723327
224	A	0.011562	0.0223814	0.0385505	0	0.0113148	0	0.1443	0.15366	0.155978	0.114737	0.174915	0.116266	0.0453001	0.0671501
226	A	0	0.0234165	0	0.0144404	0.0120062	0.0597372	0.0344986	0.102975	0.105243	0.0799574	0.142279	0.0233481	0.0542241	0.0651806
229	A	0.0117357	0.0114495	0	0	0	0.0146434	0	0.0110412	0.0372058	0	0.0106349	0.0223814	0.063891	0.0370325
230	A	0.0117467	0	0	0	0.0235433	0.073303	0	0.0110181	0.0557517	0.012734	0.0106056	0.0111982	0.0318878	0.0123107
231	A	0.0234577	0.0228258	0.0130839	0.0140865	0	0.0146413	0.0327761	0.0328515	0.0185048	0.038018	0	0.0111359	0.0635795	0
232	A	0.0823239	0.0572607	0.078637	0.0988561	0.0587406	0.220361	0.043692	0.0328371	0.0648088	0.0634759	0.0527816	0.100178	0.0636267	0.0489237
235	A	0.0244798	0.0353732	0.106397	0.131965	0.0239751	0.0304507	0.160569	0.263731	0.260015	0.189445	0.209413	0.237051	0.0218388	0.254045
236	A	0.196584	0.200898	0.119984	0.353982	0.18031	0.152999	0.414365	0.484597	0.531915	0.176439	0.309769	0.357015	0.251119	0.308725
244	A	0.0918414	0.0429307	0.0432963	0.0372995	0.0415743	0.0523195	0.19144	0.187743	0.244499	0.128432	0.213675	0.339766	0.080506	0.196493
292	A	0.0745619	0.0490978	0.123801	0.08036	0.0794552	0.0593384	0.118509	0.0738163	0.123351	0.096595	0.0495393	0.0113045	0.0912052	0.0376176
297	A	0.0104264	0.0101999	0	0	0.00931446	0.0389965	0.0271936	0.017854	0.0571662	0.0313808	0.0678541	0.0701543	0.0458873	0.0779336
299	A	0.018859	0.0186202	0	0	0	0.0938967	0.00889521	0.052687	0.0808996	0.0311818	0.0335599	0.0388274	0.0212157	0.0550358
301	A	0	0	0	0	0.00839842	0.0236267	0.0179147	0.00885818	0.0325256	0	0.00846812	0	0.0106998	0
302	A	0.00938262	0.00926097	0.0119603	0	0	0.011812	0.0178715	0.0353669	0	0.0314103	0.0337781	0.00997307	0.0106883	0.0225785
313	A	0.0482114	0.149911	0.0844289	0.0862919	0.0938326	0.0876534	0.0559284	0.083682	0.0166168	0.0659268	0.099108	0.0110424	0.078537	0.0489476
318	A	0.109539	0.0704101	0.0683216	0.104131	0.1473	0.105646	0.141919	0.184308	0.222894	0.198516	0.164048	0.167189	0.0626109	0.208671
336	A	0.00980969	0.0187899	0.0234247	0.0602845	0.0170911	0	0.0172861	0.00860437	0.0232721	0.0305655	0	0.010247	0.041013	0.0112765
339	A	0	0.00951384	0.0236967	0.0612595	0.00867152	0.0373692	0.00874355	0.0523286	0.0472218	0	0.00862292	0.0628667	0.0314235	0.0683371
343	A	0.00983478	0	0.0115607	0.0484614	0.00857633	0.0986436	0.00839701	0	0	0	0	0.0202716	0.0208746	0.0328192
348	A	0.037843	0.0456163	0.0111907	0	0.00853024	0	0	0.0477783	0.0215812	0.00935454	0.0159147	0.0289157	0	0.0102501
349	A	0.0380554	0.073381	0.0675904	0.047142	0.0858516	0.0374392	0.0401542	0.0801603	0.0362004	0.0188129	0.0640205	0.0675415	0.0526593	0
360	A	0.115075	0.071053	0.120378	0.123239	0.106254	0.0441209	0.0635459	0.0740192	0.0547945	0.0606649	0.0633847	0.0789785	0.131666	0.0128999
363	A	0.0572656	0.0564892	0.0340948	0.0697958	0.09113	0	0.0202306	0.0199521	0.00868885	0	0.0100351	0.0123077	0.0161342	0
364	A	0	0.0155376	0	0.0767018	0.0664562	0.0455789	0	0.0313578	0.0180424	0	0	0	0.0172058	0
371	A	0.0191278	0.0186811	0	0	0	0.0276396	0	0.0464145	0.0509528	0	0.0472199	0.0421408	0.0398327	0.0136705
376	A	0	0	0	0	0.0211193	0.0310078	0.0352983	0.0462749	0.0711671	0.0523697	0	0.0142268	0	0.0546448
389	A	0	0.0535332	0	0.0933416	0.0295334	0	0.02552	0.0381388	0.0346101	0.0139841	0	0.0156814	0.025113	0.0146156
392	A	0	0	0.0326264	0.0627746	0.0295858	0	0.0390117	0.103896	0.105708	0.0570695	0.0654536	0.0159439	0.101061	0.0295029
398	A	0.0729395	0.101215	0.0896057	0.120012	0.0554631	0.145085	0.0621041	0.148148	0.199534	0.151557	0.113708	0.0900225	0.0719942	0.0289687
401	A	0.201715	0.158228	0.250235	0.375235	0.288351	0.419527	0.36157	0.218228	0.473605	0.170551	0.380777	0.448916	0.456389	0.132685
408	A	0.251607	0.254453	0.4158	0.238176	0.328751	0.308761	0.420639	0.444444	0.674386	0.376903	0.516351	0.523383	0.321716	0.342466
414	A	0.0217344	0.0655594	0.0807972	0.0824629	0.022805	0.136949	0.0891947	0.113265	0.108447	0.121622	0.148629	0.153374	0.0404858	0.213159
415	A	0.0400882	0.0199402	0.0493949	0	0	0	0.0372949	0.0122699	0.0711913	0.0132626	0.0528961	0.0450518	0.0550459	0.0139043
418	A	0.0307125	0.0602864	0.0374532	0.0199005	0.0162602	0	0.100863	0.200289	0.0760787	0.0486381	0.0487626	0.0684275	0.0603774	0.0901017
426	A	0	0.0101153	0.012458	0.0136836	0	0	0	0.0104965	0.0209271	0	0.011936	0.027401	0.0347262	0
433	A	0.0488902	0.0567483	0	0.0642178	0.093985	0.0132732	0.144658	0.261698	0.209424	0.159218	0.256098	0.110147	0.0555247	0.101304
435	A	0.0099681	0	0.0230282	0.0263193	0.032175	0.0270234	0.0321509	0.109027	0.0759631	0.0940402	0.0512492	0.0999572	0.0340638	0.0391389
439	A	0.010006	0.0191534	0.0114666	0.079187	0.0214156	0.0675676	0.136612	0.149733	0.107504	0.0694284	0.0514734	0.15949	0.0343171	0.0920931
445	A	0.00968804	0.0185134	0.0220726	0.0256937	0	0	0.0480077	0.0488043	0.0399521	0.021004	0.036062	0.0135428	0.0221019	0.0856269
447	A	0	0	0.0105619	0	0.0100796	0.0125047	0.0183537	0	0	0.0101307	0.011605	0.0129921	0.0106508	0
448	A	0	0.0265557	0.010513	0	0.0100271	0.0498132	0.0181653	0.0186776	0.0387222	0.0100644	0.0230494	0.0258031	0.031881	0.0465983
449	A	0	0.00882846	0	0.0122489	0.009995	0.0124409	0.0544168	0.0093214	0.0386511	0	0.0229991	0.0387347	0.021245	0.0349
455	A	0.0463607	0.0266146	0.0321027	0.0122459	0.0505102	0.0878845	0.0722739	0.113101	0.0785315	0.0398525	0.0810842	0.0517397	0.0536423	0.0229016
458	A	0.0277264	0.00887942	0.0107078	0	0.0402172	0.0250188	0.0173415	0.0273748	0.0475783	0.00960984	0.0560601	0.0126263	0	0.0110767
460	A	0.00923958	0	0	0.0122279	0.0200924	0.0249875	0.0341822	0.0180261	0.0283313	0.0189879	0.0110963	0.0249626	0.0212562	0.0109999
464	A	0.00922424	0	0.0106998	0.012219	0.03003	0.0373692	0.0163908	0.138444	0.118732	0.0457331	0.0424313	0.0605473	0.0211954	0.0424448
465	A	0.0370096	0.00888889	0.0107377	0.0122654	0.0301023	0.0618506	0.0410172	0.0346021	0.0091416	0.00914244	0.0424178	0.0481406	0.0422386	0
468	A	0.019064	0	0	0.0253325	0.0313611	0.0640287	0.083682	0.0886525	0.190621	0.0567054	0.109242	0.0863878	0.0111074	0.0975716
469	A	0.0288906	0.0185891	0.0447878	0.0254388	0.0316356	0.0515863	0.0766023	0.117604	0.165081	0.0287549	0.0557476	0.0624844	0.0111944	0.0769231
473	A	0.084674	0.0305157	0.0731886	0.0832986	0.0815186	0.144509	0.171032	0.173712	0.125143	0.19161	0.071676	0.259669	0.126582	0.132466
476	A	0.187783	0.223001	0.128684	0.228833	0.198931	0.21875	0.268793	0.298882	0.353357	0.219758	0.368171	0.232367	0.288224	0.242395
484	A	0.232019	0.243013	0.166147	0.0443164	0.0810209	0.189215	0.197375	0.170885	0.145219	0.161204	0.102249	0.1027	0.155491	0.233857
485	A	0.108323	0.0526778	0.0629327	0.0897062	0.102902	0.167584	0.0692795	0.0641986	0.112082	0.0755858	0.10259	0.103062	0.19658	0.0907206
486	A	0.0726348	0.0884799	0.0423998	0.0677813	0.0833854	0.073046	0	0.01074	0	0.0108719	0.0386349	0.0147449	0.0595356	0.013009
489	A	0.457289	0.322928	0.302115	0.250284	0.27595	0.502134	0.157078	0.158546	0.155211	0.118778	0.114112	0.131368	0.326597	0.141899
493	A	0.287356	0.123153	0.387197	0.231065	0.296516	0.238917	0.137241	0.178834	0.199734	0.0755206	0.186012	0.0980804	0.152108	0.0250125
500	A	0.150376	0.194401	0.19985	0.211615	0.271616	0.527072	0.0289268	0.0520562	0.0640615	0.0948667	0.069979	0.0387647	0.582977	0.0347625
508	A	0.0339616	0.0722543	0.13655	0.0420787	0.0788955	0.166806	0.0187248	0.0304816	0.0700841	0.0409752	0.0334821	0.0379027	0.204146	0.0459929
512	A	0.034632	0.0548847	0.0454133	0.12826	0.0799041	0.164575	0.0190512	0.0308135	0.0898473	0.031224	0.0224972	0.0127194	0.0760225	0.0463768
516	A	0.0662252	0.0348311	0.10469	0.122449	0.0753012	0.0608766	0.170854	0.149685	0.0623182	0.151926	0.16298	0.0673219	0.07494	0.112261
519	A	0.0245218	0	0.0278823	0.0595859	0.0519143	0.0161031	0.116663	0.1937	0.249018	0.102902	0.163863	0.0531561	0.0118991	0.184797
520	A	0.0121477	0.0485143	0.0413907	0.103199	0.0128617	0.015868	0.196522	0.257017	0.192957	0.166078	0.154168	0.106938	0.0117633	0.136206
521	A	0	0	0.0136221	0.0146263	0.0255232	0.0155521	0.0495197	0.083212	0.0779499	0.0629855	0.0555864	0.040328	0	0
522	A	0.0120395	0	0	0	0	0	0.0100291	0	0	0	0	0	0.0115915	0
523	A	0	0	0	0	0	0	0	0.0105708	0.00982898	0	0	0	0.0115234	0
525	A	0	0	0	0	0	0.0146735	0	0.0105485	0	0	0	0.0135556	0	0
526	A	0	0	0	0.0413052	0	0	0	0	0.0295858	0.010609	0	0	0	0.0127421
528	A	0	0.0551268	0	0.0272294	0	0	0.0100291	0.0106247	0.019757	0	0	0.0137457	0	0.012875
529	A	0.0111595	0	0	0	0	0.0143823	0.0198138	0.0104921	0.0292141	0	0.0112931	0	0.0326371	0
531	A	0.0441989	0.0867961	0.0239578	0.0270416	0.0343407	0.0712352	0.0496376	0.0105219	0.0194685	0.0105887	0.0112905	0.0270234	0.0861141	0.0508712
533	A	0.0101885	0.0495442	0.021699	0.024777	0.0520616	0.0690512	0.0487567	0.0414723	0.0866885	0.0414079	0.0769908	0.0536337	0.0316289	0.0126072
536	A	0.032113	0.0519319	0.0332853	0.0394841	0.0213402	0.0431965	0.13302	0.130336	0.0598623	0.0645647	0.0687443	0.0563936	0.0220264	0.039772
545	A	0.0105341	0.0509372	0.0326584	0.0259943	0	0.0575622	0.0414938	0.0451875	0.0648508	0.0326584	0.0830565	0.131138	0.0759466	0.0403117
554	A	0.0105141	0	0	0	0	0	0.00978665	0.0104866	0	0	0	0	0	0.0392465
555	A	0.0104581	0	0	0.0129132	0	0.0563857	0	0.0103756	0.00998004	0.0101771	0.0328911	0.0137043	0.0316589	0.0127372
560	A	0	0	0	0	0	0	0	0	0	0.00962557	0	0	0	0
561	A	0	0	0	0	0	0.0137589	0	0	0.00971157	0.00959417	0	0	0.0102449	0
564	A	0.0105285	0.0100533	0.0106621	0.0130531	0.0105943	0	0.0298033	0.0762278	0.0536193	0.0410298	0.0452847	0.0289101	0.0113289	0.0130582
569	A	0.00998702	0	0.010469	0	0	0.0143184	0.0973899	0.161743	0.187039	0.139179	0.111136	0.0717257	0	0.0779221
574	A	0	0.00965624	0	0.0366435	0.0101678	0.0144655	0	0	0	0	0	0	0	0
575	A	0.010015	0	0.0106815	0	0	0.0289687	0	0	0	0	0	0.0279057	0	0.0126167
576	A	0	0.00961631	0.0213447	0.0242895	0.0101781	0.0719217	0	0	0.0101051	0	0	0.012832	0.022119	0
583	A	0.0113122	0.0114299	0	0.0140292	0	0.017307	0	0	0.0106213	0	0	0	0.0394945	0.0118666
584	A	0.0351617	0.0592557	0.0269614	0.11606	0.0645494	0.0917095	0.0278396	0.0104047	0.0536826	0	0.0539084	0.0266667	0.0137118	0.0361446
587	A	0.0118469	0.0121007	0.0138064	0.0438661	0	0.167848	0.0267189	0.00992753	0.010305	0.00909422	0.030722	0	0.0137969	0.0110717
590	A	0.0121065	0.0123701	0	0.029634	0.0134102	0.0771307	0.0268625	0.019982	0.0311818	0.00919794	0.0103381	0.023801	0.0142288	0.0334374
594	A	0	0	0.0826037	0.0168776	0.0157282	0.103713	0.00931272	0.0312272	0.0107666	0.00956389	0.0108143	0.0122011	0.029873	0.0114653
599	A	0.14041	0.131234	0.151592	0.154772	0.111199	0.100503	0.215054	0.218796	0.233051	0.194024	0.259263	0.157671	0.129125	0.103046
604	A	0.0411749	0.067981	0.0932546	0.0825764	0.0424508	0.0899119	0.198169	0.155231	0.132316	0.146556	0.107747	0.0239177	0.108152	0.103318
605	A	0.0957985	0.0269906	0.0308404	0.0329001	0.0280034	0.0718262	0.0755715	0.0829531	0.0510152	0.107685	0.0540599	0.0239923	0.0810592	0.115221
616	A	0.0712758	0.0795545	0.0687191	0.0575871	0.0340716	0.174368	0.0973331	0.107782	0.231506	0.12147	0.0768724	0.0477555	0.0864625	0.104215
619	A	0.0653595	0.0371978	0.0598176	0.0624902	0.108173	0.241582	0.0490966	0.0637416	0.0826105	0.0105731	0.0663717	0.163781	0.210831	0.0470533
628	A	0.0136668	0.0496339	0	0.0162999	0.021624	0.0258331	0.00957396	0.0202204	0	0	0.020674	0.0424944	0.0548607	0.0111198
629	A	0.0273224	0.0123854	0	0.0162999	0.010791	0.0257433	0.00958773	0	0	0	0.0103423	0.0106496	0.0545911	0
634	A	0.0111235	0.0200763	0.0222346	0.0399308	0.0265487	0.0188964	0.0800569	0.157875	0.195628	0.0903433	0.151157	0.0295479	0.0322321	0.020803
640	A	0.115585	0.0351834	0.00966184	0.0569606	0.030446	0.0572878	0.124892	0.170906	0.139561	0.077084	0.08121	0.103788	0.0849017	0.0911993
641	A	0.00958313	0.0262536	0	0.0338639	0.0227687	0.0163532	0.00971817	0.0203231	0.00942329	0.0111025	0.020452	0.020903	0.0424028	0.0459506
643	A	0.00931966	0.0171043	0.0094509	0	0.00742666	0.0161447	0.0289184	0.0403633	0.0655861	0.0221117	0.0507563	0.0728256	0.0419287	0.0341997
648	A	0	0.0169563	0.0187319	0.0436062	0.00731368	0.015916	0.0803536	0.0944584	0.0671334	0.0924108	0.0314696	0.0227713	0.0420404	0.0614251
650	A	0.00922339	0	0.00933968	0	0.0145794	0.0237756	0.0101399	0	0	0.0116822	0	0.0114312	0	0.0122835
653	A	0.0091954	0	0	0.0326619	0.0290044	0.0157654	0	0	0.00961816	0	0	0.0112892	0.0208565	0
654	A	0.0276065	0.0253079	0	0.0108897	0.0217565	0.0315607	0	0	0	0	0	0.0226989	0.0278493	0
655	A	0.0276065	0.00842602	0.0185839	0.0217723	0.00725426	0.0236332	0	0.0208225	0.0191975	0	0.0104037	0.0112689	0.0348238	0.0121256
664	A	0.0721501	0.114307	0.0948367	0.0483617	0.0642055	0.0257798	0.105787	0.0974553	0.15027	0.0501945	0.11828	0.0897465	0.0696648	0.126056
668	A	0.0110767	0.0206954	0.0111694	0.0129166	0.0426403	0.0450572	0.0103018	0.0104526	0	0	0.0418629	0.0108061	0.0237906	0
669	A	0.011207	0	0	0.0130548	0.025871	0.0359163	0	0	0	0	0	0	0.00790514	0
670	A	0	0.0211037	0.0113623	0.0131096	0.00864528	0.0270222	0	0.0203687	0	0	0.0101978	0	0.00791014	0
671	A	0.0229911	0.0107852	0	0.0134012	0.00885347	0.0642143	0	0.0103157	0	0	0.0102997	0.0105843	0.0160462	0
672	A	0	0.0108284	0	0.0134716	0.00890631	0.0183807	0	0.0617856	0	0	0.0102881	0.010563	0.0241604	0.0118878
679	A	0.01239	0.0471309	0.0249969	0	0	0.010143	0.0308928	0.0205465	0.0583487	0.0498878	0.0502058	0.0333037	0.0704784	0.0257765
685	A	0	0.012444	0	0.0621697	0.0103681	0.0220313	0.267473	0.242971	0.334485	0.263377	0.213531	0.0985829	0.0391045	0.244253
693	A	0.170524	0.0571886	0.0632591	0.132139	0.0630517	0.0437015	0.104469	0.148385	0.0683683	0.176919	0.121708	0.0705799	0.0590029	0.0688705
715	A	0.016714	0	0.0186376	0.0102554	0.0203555	0.00753069	0.0549089	0.0107701	0.0223639	0	0.0103413	0.0107262	0.0064914	0.0364078
720	A	0	0.00795292	0.0189179	0	0.00687758	0.00763126	0.011526	0.011241	0.011868	0.0251699	0.010866	0.0348473	0.0130976	0.0127584
724	A	0.00855359	0.0160746	0.00959785	0.0314334	0.013986	0.00770891	0.0594672	0.0815376	0.0372255	0.0387347	0.0453823	0.0242954	0.00659239	0.0393804
763	A	0.196906	0.115075	0.277296	0.205479	0.199829	0.200631	0.0248016	0.0724813	0.102775	0.119446	0.0251004	0.0341647	0.288018	0.0294118
771	A	0.0290192	0.0290613	0	0.0364431	0.0476872	0.0740924	0	0.02151	0.0225124	0.0212495	0	0.0301205	0.0566679	0
776	A	0.0188466	0	0	0	0.0465116	0	0	0	0.0202675	0	0	0	0	0
794	A	0.0213927	0.029703	0.010553	0	0.0163506	0.0083612	0.033415	0	0.0120511	0.0121036	0.0224643	0.0366972	0.014044	0
795	A	0.0104723	0	0	0.0131718	0	0	0.0217699	0.0221951	0.0354484	0.0119804	0	0.0241663	0.0554477	0.0130005
802	A	0	0	0	0.0209424	0.0193237	0.00680226	0.009997	0.0102638	0.0111049	0	0	0	0.0171331	0
808	A	0.0150659	0.00708918	0	0.00950751	0.0120576	0.0192184	0.00941088	0.0193648	0.0421408	0	0.00967305	0.0103455	0	0
809	A	0	0	0	0.0188644	0.0119775	0.0254777	0	0	0.0208986	0	0	0.0102807	0.0106746	0
810	A	0.0149566	0.0211536	0.0153315	0.0188626	0	0.00637146	0	0.00959141	0.0314531	0	0.0191847	0.0205825	0.0106878	0.0216708
811	A	0.00745156	0.0140617	0.00764468	0.00940468	0.0119389	0	0.00926784	0.00953925	0	0	0	0	0.00532765	0
812	A	0	0	0.00764643	0.00939585	0	0.0190186	0.00924727	0	0	0	0	0	0.00531887	0.0107423
813	A	0	0.00702001	0.00764409	0.0187988	0.00596872	0.00633714	0	0	0.0313545	0	0	0	0.0106326	0
816	A	0.0223964	0.00704622	0	0.0283607	0.0119868	0.0191902	0.028509	0.00974469	0.0214316	0.0104635	0.0197122	0.0209666	0.02696	0.0109529
818	A	0.0223647	0.00703532	0.00766695	0.0470987	0.0239952	0	0.0397733	0.050984	0.0452386	0	0.0518672	0.0425804	0.0270168	0.0333296
825	A	0.00742666	0.0279857	0.0231911	0.0282326	0.0121795	0.038625	0.0502311	0.052263	0.0464684	0.0439947	0.0542064	0.0736842	0.0383394	0
826	A	0.0451094	0.0494875	0.0156165	0.0570396	0.0431992	0.0262261	0.0102891	0	0.047824	0	0.0111807	0.0214179	0.0221951	0
827	A	0.143483	0.19892	0.203762	0.1242	0.16131	0.0986777	0.0207447	0.0217391	0.0361011	0.0457038	0	0.0322269	0.116803	0.054484
830	A	0.249417	0.228258	0.3457	0.21457	0.319445	0.360718	0.23273	0.131579	0.216711	0.173611	0.22792	0.297849	0.470967	0.156582
837	A	0.119308	0.0773994	0.130548	0.1999	0.155387	0.158641	0.0329743	0.0797994	0.206311	0.0598659	0.0472422	0.152582	0.133125	0.0935563
847	A	0.0456152	0.0226014	0.0402361	0.0145943	0.0545554	0.0482276	0.013231	0.0274386	0.0141123	0.042511	0.0451264	0.0645891	0.0834376	0.014997
849	A	0.0803397	0.0908162	0.0403226	0.0732708	0.0219756	0.0608939	0.0268025	0.0278087	0.0286	0.0286533	0.0152975	0.131817	0.0635391	0.0909918
854	A	0.106032	0.175521	0.15162	0.21479	0.297245	0.271704	0.539829	0.666389	0.706357	0.386986	0.80879	0.603589	0.181612	0.21078
858	A	0.0157431	0.0315906	0	0.0417362	0.0490677	0.103448	0	0.0458435	0	0	0.0340599	0.0371885	0.0763709	0.0166417
861	A	0.0165426	0.0165865	0.0201005	0	0.0173792	0	0.0734754	0.0465983	0	0.0317007	0.0174034	0.0194212	0.0504626	0.0347584
862	A	0.0161342	0.0321854	0.0389257	0.021575	0.0678771	0.0179986	0.0143082	0.0302024	0.0461752	0.0462535	0	0	0.0152555	0
864	A	0.0158806	0	0.0561167	0	0.0334616	0	0.0282087	0.0297663	0.0152765	0.0151906	0	0.0177778	0.01485	0.0159286
865	A	0.030774	0.0153163	0.03641	0	0.0653488	0.0517509	0.013795	0.0145033	0.0449775	0.0297796	0.064914	0	0.0145985	0.0155836
869	A	0.0715001	0	0.0677622	0.0394011	0.0159693	0.0711238	0.349603	0.254094	0.189643	0.294204	0.302259	0.293103	0.059453	0.218409
870	A	0.0851789	0.0421644	0.0842602	0.0588582	0.0638264	0.0177179	0.308104	0.267304	0.247021	0.323387	0.222258	0.222488	0.0737028	0.139319
872	A	0	0	0.0330415	0.0194363	0.0476948	0	0.0267666	0.0140017	0.0575126	0	0.0478164	0.0343466	0.0147754	0
875	A	0.0380132	0.0611172	0.0146113	0.0698324	0.0287604	0.0801667	0.125913	0.18477	0.229296	0.138179	0.074438	0.124301	0.0536049	0.21097
886	A	0	0	0.0136388	0	0	0.0156568	0.012222	0.0391236	0	0.0135575	0.0139841	0	0	0.0121462
903	A	0.0483325	0.0233754	0.0418644	0.0330961	0.0271407	0.0156446	0.0237135	0.0371471	0.049456	0.0514205	0.0405625	0	0	0.0116306
904	A	0.0121286	0	0.0421526	0.0166003	0	0.0628239	0.0237784	0.0495233	0.0124224	0.0386698	0.0270161	0.0118892	0.0897206	0.0232153
908	A	0.0618582	0.0479386	0.0430849	0.0339213	0	0.0322685	0.149477	0.107028	0.119689	0.113393	0.169183	0.138488	0	0.0902222
913	A	0.0274688	0.0526385	0.079783	0.0373483	0.112054	0.112317	0.1398	0.230769	0.12888	0.132021	0.157423	0.0668375	0.145603	0.0981675
916	A	0.0139723	0.026907	0	0	0.0494153	0.03861	0.0323415	0.0330797	0.0214823	0.012038	0.0243873	0.0218436	0.0300526	0.010784
919	A	0.0139101	0.0537779	0.0659522	0.0379363	0.049776	0.0383877	0.0626828	0.0318404	0.0520237	0.116618	0.15361	0.020982	0	0.0513875
920	A	0.209409	0.175131	0.181969	0.0951475	0.266002	0.115852	0.209424	0.31736	0.145228	0.198228	0.306531	0.293132	0.151217	0.184162
922	A	0.26004	0.252278	0.207541	0.11825	0.242131	0.126449	0.277126	0.364026	0.261972	0.345691	0.347972	0.16169	0.224797	0.118407
926	A	0.786164	0.904159	0.841198	0.726165	0.776144	0.62069	0.340462	0.489154	0.501484	0.403561	0.504383	0.380912	0.559414	0.33766
938	A	0.0171409	0	0.0393933	0.0636132	0.0572082	0.0593824	0.0495835	0.0773994	0.0550964	0.0329888	0.108507	0.107747	0.0656707	0.0829359
944	A	0.0790889	0.0613215	0.106591	0.0776699	0.0706714	0.0367985	0.038884	0.0285796	0.036533	0.0426621	0.0213858	0.0105619	0.0750075	0.0202716
955	A	0.164853	0.0936037	0.1002	0.19857	0.187935	0.131037	0.0195084	0.084515	0.087974	0.0541301	0.0842549	0.0849708	0.425298	0.0201106
957	A	0.0164096	0	0	0.0592066	0.056243	0.0750047	0.0489476	0.0660004	0.0442439	0.0326193	0.0317292	0.0321509	0.0275255	0.0305375
962	A	0.0149031	0.0280859	0	0.0179824	0.0170736	0.0340832	0.0177794	0.0781725	0.0404367	0.0394711	0.00971534	0.0504439	0.0233182	0.0474024
963	A	0.0297133	0	0	0.0179469	0	0.0338009	0.0444405	0.0173445	0.0161512	0.0196947	0.0194099	0.0200521	0	0.0471654
964	A	0.014817	0.0139938	0	0.0179147	0	0	0.00891345	0.00870928	0	0	0	0.0100251	0.0229647	0
972	A	0.108121	0.10218	0.0479214	0.130586	0.0689845	0.212455	0.042996	0.0504838	0.0313014	0.056391	0.0467377	0.120717	0.0633943	0.113706
980	A	0.0203666	0.00961908	0.0103466	0.0609607	0.0235156	0.0471976	0.00811227	0.055768	0	0.0177699	0.00883939	0.0275533	0.00828295	0.00864902
981	A	0.0613246	0.0483325	0.0207469	0.0488878	0.0235045	0.0820826	0.139826	0.105855	0.110783	0.036222	0.13488	0.0745921	0.0327896	0.0962969
983	A	0.0671914	0.0182916	0.0394555	0.0462267	0.0219829	0.0665927	0.0240308	0.039692	0.0506586	0.0350754	0.0176975	0.0642379	0.126133	0.0428156
987	A	0.0782201	0.0666333	0.0369994	0.0532822	0.0302267	0.124378	0.179332	0.135206	0.137826	0.0417955	0.0589424	0.0609969	0.230689	0.121803
990	A	0.0181868	0.0785958	0.0585823	0.0669942	0.0423774	0.0862255	0.177401	0.124243	0.121742	0.0954281	0.0876501	0.198735	0.0842783	0.192727
992	A	0.028436	0.00914495	0	0.0232423	0	0.0452386	0.054958	0.0396322	0.0512858	0.0616197	0.0630972	0.0463521	0.0474383	0.0422262
996	A	0.0269348	0.0262559	0.0100331	0.0332853	0.0323799	0.0331712	0.0511808	0.0521843	0.0617665	0.0243487	0.0340483	0.079646	0.0625684	0.0317637
997	A	0.0178987	0	0	0.0330542	0.032113	0	0.0426894	0.0722335	0.0734214	0.0157307	0.0410711	0.0429037	0.0233791	0.0692361
998	A	0.00898392	0	0.030012	0.0221312	0	0.0221019	0.0283869	0.0359945	0.00665912	0.0235239	0.00819202	0.0767002	0.0627451	0.030581
1001	A	0.00898634	0.0261849	0	0	0	0	0.027287	0.0137165	0.019129	0.0302526	0.0311794	0.00793966	0.0155533	0.0145613
1008	A	0.017408	0	0.0300511	0.0217794	0.0107216	0.0226372	0.0455344	0.104842	0.0482771	0.0942166	0.0817479	0.0539208	0.0403031	0.0281631
1009	A	0.00869641	0	0.0200361	0	0	0	0.00646371	0.032569	0.0300842	0.0216201	0.00738825	0.015341	0.016116	0.0349577
1011	A	0.00882457	0.0262032	0.0102291	0	0	0.0229253	0.0132179	0.00669075	0.0124339	0.0222305	0.0151378	0	0.0163385	0
1012	A	0	0.00871764	0	0.0110717	0.0108425	0.0228728	0.00658415	0	0.00619348	0	0	0.00773455	0.0326078	0
1020	A	0.00876194	0	0	0	0	0.0332816	0	0.0128908	0.00604814	0.00708215	0.00722335	0	0.0247239	0
1023	A	0.0176351	0.0351463	0.0102512	0	0.0434405	0.0453823	0	0.0065304	0.00612632	0	0	0	0.00855432	0
1024	A	0	0.0262996	0.0204625	0.0333519	0.0542005	0.0337534	0	0.00652103	0.00611958	0.00717051	0	0.00720202	0.0255646	0.0133476
1027	A	0	0.00934492	0.0327976	0.0116945	0	0.0243694	0.0130984	0.0333667	0.0630875	0.0218755	0.0960899	0.0439367	0.0465896	0.0275425
1028	A	0	0	0.0111173	0.0118934	0.0114745	0.0618276	0.0397456	0.0269505	0.044677	0.0295007	0.052231	0.0372024	0.0566572	0.042005
1030	A	0.0189681	0.00947777	0.0339098	0.0119746	0.023218	0.0125534	0.0613204	0.15376	0.192601	0.0846479	0.164281	0.11918	0.0284252	0.0810313
1031	A	0.00946163	0.00946611	0.0113122	0.0239722	0	0.0251731	0.0755702	0.119752	0.26164	0.0930305	0.190295	0.119799	0.0377145	0.0887968
1034	A	0.0668769	0.0285741	0.0679348	0.0242954	0.0698731	0.0490798	0.146579	0.118401	0.0877311	0.0910609	0.0469888	0.108882	0.0922935	0.0787345
1035	A	0	0.0177762	0.0421319	0.0114038	0.0331455	0.0353066	0.0720886	0.0821018	0.0598603	0.0524109	0.0616143	0.0689127	0.0439406	0.0566853
1036	A	0.0268553	0.0177762	0.0210948	0.0227972	0.0221214	0	0.0459559	0.048153	0.0400107	0.0225394	0.0154345	0.0537263	0.0263389	0.0212932
1042	A	0.125718	0.140907	0.154655	0.230415	0.155798	0.19312	0.188324	0.252284	0.193824	0.187126	0.167199	0.217082	0.150509	0.219035
1049	A	0	0.0100231	0.0227041	0.0133476	0.0127584	0.040123	0.0357961	0.0223081	0.0145423	0.0163319	0.00819874	0.00800897	0.00982125	0.00762544
1050	A	0.0104351	0.010021	0.0113263	0.0133476	0.038134	0.0263123	0.0432557	0.0224417	0.051395	0.0247586	0.0328785	0.0714569	0.00969744	0.068156
1052	A	0	0.0100685	0	0	0	0	0.0293707	0.0304832	0.0225428	0	0.0252101	0	0	0
1055	A	0.0205994	0	0.0227868	0.0131978	0.01239	0.0385159	0.116414	0.0756773	0.0834851	0.0839208	0.0586953	0.0482044	0.0288739	0.0466454
1058	A	0	0.0101698	0.0117343	0.0268709	0.0126534	0	0.0377358	0.0158806	0.0157159	0.0176382	0.00879894	0.00849618	0	0.00825968
1060	A	0	0.010012	0	0	0.0123793	0.0129887	0.186495	0.255291	0.289366	0.173754	0.166359	0.0820868	0	0.0702247
1062	A	0.0406711	0.0295479	0.0114639	0.0257301	0.0122249	0.0383387	0.0627008	0.0910596	0.12054	0.0649592	0.0942685	0.0923873	0.0755501	0.0802926
1070	A	0.0374813	0	0	0.0118175	0.0230601	0	0	0.00830565	0.0161629	0.0184843	0	0.00933532	0.0180668	0.0359131
1077	A	0.0180278	0.017584	0.020903	0	0.0556669	0.023855	0.307593	0.367867	0.331044	0.312057	0.294349	0.555231	0.0528541	0.364998
1080	A	0	0	0	0.0117966	0.011562	0.0124984	0.0696621	0.0273748	0.0354264	0.0306937	0	0.0212179	0.037296	0.0203583
1082	A	0	0	0	0	0	0.011805	0	0.0174004	0.0169607	0.00975039	0.030389	0.0100482	0.0178508	0.00962279
1083	A	0.0175932	0	0.0103199	0.0220459	0	0.0115367	0.0081493	0.0172161	0.0083647	0	0.0300451	0.0198177	0.0175963	0
1084	A	0.0264131	0.0172147	0.0103434	0.0440966	0.03222	0.0350713	0.0244419	0.0172043	0.0250606	0.0577701	0.030015	0.0198866	0.0533096	0.0285117
1087	A	0.0185546	0.0180799	0.0434122	0.04649	0.0340406	0.0373413	0.160813	0.116843	0.17328	0.050035	0.063065	0.0730079	0.0573614	0.0691905
1093	A	0.32522	0.397959	0.311216	0.418958	0.256115	0.395313	0.329133	0.328653	0.301858	0.269774	0.242215	0.183234	0.525164	0.0628272
1100	A	0.0558347	0.12177	0.0854701	0.0687049	0.129555	0.0718391	0.054615	0.0461574	0.0851879	0.0248756	0.0400962	0.0398301	0.114827	0.011805
1113	A	0.0141004	0.0139179	0.0166306	0.0531444	0.0164096	0	0.0116414	0	0.0112778	0	0	0	0.013776	0
1119	A	0.0685777	0.0944032	0.0627943	0.0348493	0.0812216	0.0687994	0.589971	0.608099	1.17407	0.347078	0.631517	0.087184	0.0520969	0.183944
1122	A	0.0145159	0.100315	0.0660284	0.111753	0.0170678	0.0886054	0.064834	0.0976835	0.0796601	0.0729607	0.0313283	0.0299985	0.0819001	0.0134916
1133	A	0.118544	0.0828638	0.0911245	0.0643915	0.0365764	0.054181	0.0343289	0	0.0351	0.0133618	0.041488	0.0262467	0.10222	0
1143	A	0.0489956	0.0318319	0.121909	0.149381	0.0719036	0.0823045	0.0318674	0.0230494	0.0438548	0.0123962	0.0130124	0.0235738	0.0386548	0.0323102
1144	A	0	0.0318725	0	0	0	0.016442	0	0	0.0219684	0.0124239	0	0	0.0128337	0
1145	A	0.0653702	0.079783	0.0523286	0.0641437	0.0541126	0.115283	0.0432059	0.0468165	0.077821	0.075662	0.0264866	0.0239063	0.141044	0.043351
1148	A	0.0135943	0.0531491	0.0147842	0.0177778	0.0152161	0	0.0195255	0.0531293	0.091893	0.103069	0.0484086	0.0551755	0.0792483	0.111415
1149	A	0	0.0129921	0	0	0	0	0.0482021	0.0315192	0.0606061	0.0340252	0.0359669	0.0328012	0.0111882	0.0704013
1150	A	0	0.0128189	0	0	0	0	0.0288573	0.0418804	0.121139	0.0566444	0.0478985	0.0546866	0.0222198	0.150693
1170	A	0.106838	0.0758006	0.165216	0.137466	0.10301	0.0694043	0.0344947	0.0752162	0.066357	0.0305499	0.0327297	0.0305157	0.0848576	0.0561693
1173	A	0.0295421	0.0382592	0	0.025227	0.0581395	0	0.00874891	0.0287825	0.0386436	0.0412031	0.0447778	0.031263	0.019216	0.0285987
1181	A	0.0277162	0.0182465	0.0329417	0	0.022581	0	0.0805607	0.0703482	0.0354767	0.0649773	0.0310655	0.0408288	0.0486571	0.0830641
1182	A	0.00925669	0.0273798	0.0109987	0.0240269	0.0113109	0.0462642	0.0242522	0.0176523	0.0713967	0.0186445	0.0208052	0.0409458	0.0389408	0.0185237
1183	A	0.00928074	0.0274876	0	0.0120671	0.0227144	0.0232288	0.00809389	0.00884408	0.0179195	0.0186776	0.0208312	0	0.0389902	0
1188	A	0.0463435	0.0639211	0.0560852	0.0486263	0.0454339	0.083632	0.463883	0.592795	0.594789	0.320634	0.453417	0.52853	0.128675	0.394231
1189	A	0.0373727	0.0275685	0.0452438	0.0367782	0.0571625	0.0361228	0.449457	0.538183	0.521286	0.287963	0.384193	0.253053	0.0498058	0.146872
1190	A	0.0378609	0.0279252	0.0115194	0.0124378	0	0.0488818	0.0356347	0.0786318	0.0513242	0.0705361	0.0231777	0.0698405	0.0303644	0.0411946
1194	A	0.0093835	0.0276932	0.0114168	0.0371058	0.0229647	0.0487567	0.0265299	0.0292797	0.0204269	0.0100381	0.0115447	0.0351824	0.0504236	0.0207147
1195	A	0.0186081	0.0275204	0.022668	0.0368913	0.0227583	0.0971699	0.0522876	0.04798	0.0505204	0.0494805	0.0456361	0.0116036	0.0100837	0.0511457
1196	A	0.00933445	0.0183925	0.0227454	0.0369914	0	0.0243576	0.0440956	0.019333	0.0305998	0.019992	0	0.0117467	0.0101153	0.0207684
1199	A	0	0.0188573	0.0116604	0.012639	0	0.0128568	0.126928	0.150376	0.203851	0.066123	0.0645245	0.0953029	0.0105921	0.0956823
1200	A	0.00988338	0.00969086	0	0.0259774	0.0357782	0.0263158	0.16934	0.131119	0.219071	0.112259	0.0392773	0.096432	0.0432573	0.109369
1204	A	0.138614	0.174927	0.119175	0.0652827	0.119303	0.119585	0.213263	0.246223	0.261593	0.25163	0.26763	0.281928	0.0767123	0.239355
1208	A	0.279107	0.2143	0.177033	0.1585	0.1638	0.200552	0.416878	0.414241	0.436372	0.235796	0.363306	0.208536	0.127714	0.0972408
1209	A	0.0895522	0.0974754	0.0470256	0.158709	0.0932945	0.187266	0.289615	0.125028	0.155595	0.125456	0.131544	0.126868	0.170867	0.135268
1214	A	0.35332	0.270406	0.331243	0.332917	0.230894	0.241779	0.231788	0.400194	0.275482	0.509771	0.437668	0.436484	0.389864	0.376917
1217	A	0.0281558	0.0447868	0.0623053	0.10049	0.0416103	0.0661157	0.0673703	0.0497574	0.0383828	0.0370508	0.0580383	0.0307834	0.0915378	0.0396773
1220	A	0.0251847	0.0400224	0.0469704	0.0340175	0.0464554	0.0291772	0.0425532	0.0588374	0.0489656	0.0117275	0.0269869	0.0571837	0.0272603	0
1223	A	0.024669	0	0.0459263	0.0111049	0.00905387	0.0475556	0.0211797	0	0.0369595	0.0697431	0.0268889	0	0.0621559	0.0499625
1228	A	0.00789266	0.0224652	0.0899604	0.0106474	0.0523332	0.0375164	0.032591	0	0.0128617	0.0118064	0.0136986	0.0144655	0.0348432	0.0127763
1240	A	0.0160862	0.0152555	0	0	0.00875657	0	0	0.0148721	0.102337	0.0418585	0.0818063	0.0158353	0.0178747	0.0431779
1241	A	0.0160565	0.00762079	0	0.0107101	0.00875197	0.00953562	0.0130787	0	0.0169693	0	0	0	0.0178555	0
1246	A	0.0165098	0.0157159	0.0189018	0	0.0182216	0.0196002	0.0290909	0.0646831	0.0759301	0.0899685	0.0527241	0.0339732	0.018423	0.0154107
1250	A	0	0.0394726	0.00949487	0.0110193	0.00918105	0.0198413	0.044964	0.016728	0.0800801	0.0154226	0	0.0173581	0.028082	0.0158078
1251	A	0.0166945	0.0238436	0.0191388	0.0442919	0.0277546	0.0198689	0.0609292	0.034118	0.0408413	0.0468165	0.0552283	0.0349223	0.0468691	0.0476644
1253	A	0.0415662	0.142766	0.0856083	0.055139	0.0832485	0	0.105852	0.0843455	0.200723	0.0773635	0.108499	0.155306	0.103852	0.126442
1258	A	0.0250962	0	0.0386026	0.0223364	0.0189627	0.0418629	0.0150173	0.0169062	0.05923	0	0.0687049	0.135272	0.0407332	0.0634417
1259	A	0.0251235	0.0241196	0.0289995	0.0335758	0.00950209	0.0734368	0.0602591	0.101317	0.0988142	0.0614345	0.188485	0.153035	0.0407789	0.0318776
1260	A	0.0503905	0.0483754	0.00971534	0.0224492	0.019115	0.0741447	0.0605144	0.0509338	0.0992851	0.03108	0.0172563	0.0171821	0.0620155	0.0646412
1265	A	0.0965484	0.0852119	0.122978	0.163416	0.133308	0.180142	0.199071	0.218914	0.252058	0.163733	0.216201	0.409774	0.260573	0.351494
1276	A	0.658307	0.608965	0.76512	0.616506	0.673854	0.732233	0.137852	0.0379747	0.0946586	0.149347	0.107759	0.181324	0.646962	0.0531138
1278	A	0.0930124	0.187348	0.158019	0.168582	0.0930604	0.508005	0.0787579	0.110742	0.0521785	0.0366077	0.0708048	0.151976	0.375235	0.0391236
1282	A	0.236967	0.214235	0.361764	0.293494	0.212736	0.340426	0.230491	0.27277	0.187523	0.29329	0.193776	0.282938	0.406918	0.332608
1284	A	0.107267	0.0775094	0.0587976	0.176772	0.0450789	0.0354045	0.0222148	0.0481232	0.0375799	0.0237756	0.0342153	0.0248016	0.106415	0.0262674
1287	A	0.0550282	0.0267094	0.0299985	0.0729794	0.015456	0.124091	0.054939	0.096258	0.0986558	0.129732	0.0675828	0.184729	0.0608643	0.117786
1291	A	0	0	0	0.0312305	0	0	0.042767	0.0234632	0.0359971	0.0114521	0.0218579	0.0119332	0.0132573	0.0386947
1293	A	0.0107469	0.0101276	0.0110914	0	0.0233891	0.013151	0.0409878	0.0336285	0	0.0221729	0.0105097	0.0111321	0	0.0619732
1295	A	0.00968523	0.00903016	0.00996016	0.0125439	0.0103983	0.0345582	0.0406009	0.0551633	0.0686813	0.0109842	0.0310655	0.0107515	0.0315889	0.0122519
1299	A	0.00849041	0.0159566	0	0.0110754	0	0	0.0292912	0.0106202	0.0111185	0.010582	0.019992	0	0.0191865	0.0118511
1301	A	0	0.00778938	0.0086326	0.0108436	0.0264364	0	0.0196386	0.0321062	0	0.0425035	0.0300782	0.0206569	0.0374602	0.0472646
1313	A	0	0	0.00793021	0	0.0156912	0.0541565	0	0.0105452	0.0217297	0	0	0	0.043779	0.0229991
1332	A	0.0611662	0.0758581	0.0211119	0.0174978	0.102201	0.186538	0.382241	0.420901	0.417493	0.31569	0.344004	0.347187	0.201021	0.237624
1344	A	0	0.00552792	0.00633272	0.00776458	0	0.0331389	0.0190349	0.0292398	0.0470367	0.0203211	0.0167336	0.0177557	0.0203915	0.0123716
1353	A	0.0536733	0.0124743	0.049561	0.0347524	0.0208261	0.0305087	0.14328	0.123551	0.142666	0.164389	0.107438	0.118365	0.0229973	0.0765599
1357	A	0.0400027	0.0241284	0.0336882	0.00848608	0.0544366	0.0596481	0.0622056	0.0625614	0.0664121	0.105698	0.0627205	0.0515198	0.0139587	0.0696136
1369	A	0.0120308	0.00546687	0	0	0.00638978	0.0135879	0	0.00815993	0	0	0	0.0159198	0	0
1370	A	0.00597979	0.0108838	0.00603938	0	0	0.00673219	0.0161825	0.00809127	0.0445865	0	0.00721709	0.00787216	0.0305157	0
1376	A	0.011279	0.00518108	0.0115453	0	0.0060042	0.0387297	0.208259	0.216763	0.224154	0.120135	0.132013	0.0434122	0.0176015	0.0473485
1378	A	0.0170542	0.0105269	0.0117689	0.0074096	0.00614553	0.0333489	0.139093	0.185271	0.226261	0.127529	0.331897	0.0906755	0.0122212	0.0395531
1379	A	0.017002	0.0210073	0.0117661	0	0.00613309	0.0133316	0.0232829	0.031068	0.0367161	0.0170663	0.0213569	0.0151183	0.0122145	0.00989413
1382	A	0.0407783	0.0541477	0.0365141	0.0531632	0.03803	0.0345566	0.236314	0.251059	0.246674	0.173325	0.203193	0.184758	0.0508971	0.0807428
1383	A	0.183096	0.225659	0.377475	0.177373	0.232213	0.279388	0.865869	0.784375	0.736233	0.676086	0.712209	0.891142	0.250016	0.773714
1386	A	0.0251004	0.0410196	0.0266188	0.0163265	0.0409556	0.0570817	0.00753807	0.0834915	0.0291843	0.0578847	0.0356176	0.0585095	0.059654	0.0362122
1388	A	0.0608684	0.0571211	0.0576452	0.026087	0.0800641	0.0595371	0.0782534	0.0236612	0.0380141	0.0516885	0.0521299	0.0299491	0.0702297	0.0277624
1396	A	0.0532725	0.0365657	0.025227	0.0295829	0.0165057	0.0371368	0.0860585	0.121655	0.125987	0.0861409	0.103708	0.0718455	0.0252717	0.0102522
1401	A	0	0	0.00850774	0	0	0.00959233	0	0.00857706	0.00842602	0	0.0086192	0.0182266	0.0174019	0.0311268
1402	A	0.0152718	0.00737953	0.00846453	0	0	0.019073	0.00852224	0.00852588	0.00837381	0.00943841	0.00856018	0.00901307	0.0173445	0
1405	A	0.00764059	0.00737246	0	0	0.00827335	0.0191534	0.00850123	0	0	0	0.00854701	0.0266643	0	0
1409	A	0.0382936	0.0221844	0.00853534	0.0297	0.066302	0.0672237	0.0253979	0.0256827	0.0335514	0.0376896	0.0599366	0.070373	0.0527009	0.0298716
1414	A	0.302364	0.365631	0.410545	0.449247	0.304143	0.263092	0.123892	0.174216	0.143472	0.0740427	0.172529	0.0885217	0.19592	0.076461
1421	A	0.0702494	0.167404	0.37703	0.202461	0.195567	0.519555	0.175765	0.104015	0.0711527	0.0571037	0.101585	0.174735	0.423093	0.0814332
1438	A	0.0243487	0.0122264	0.0140944	0.0311236	0	0.0270051	0.0102533	0	0	0	0.0191058	0.0381679	0.0351989	0.0109517
1439	A	0.0246731	0.0370599	0.0142005	0.047118	0.0372949	0	0.0308166	0.0100654	0.0193667	0.010777	0.0191571	0.028667	0.0470201	0
1446	A	0.0249844	0.0248016	0.0824516	0.0631313	0.110484	0.0517866	0.135885	0.166058	0.0832293	0.034961	0.112428	0.235873	0.0665336	0.0970285
1448	A	0.0520562	0.0257003	0.0423968	0.0654986	0.0126231	0.0137043	0.125471	0.132773	0.103681	0.0350222	0.102944	0.125707	0.0229674	0.0494927
1452	A	0.208426	0.144321	0.105996	0.31534	0.136388	0.126529	0.0692361	0.0558659	0.0527482	0.094518	0.0619771	0.115219	0.151392	0.0373552
1454	A	0.13827	0.132979	0.106561	0.133232	0.124723	0.281532	0	0.0442968	0.0104493	0.0234907	0.0614502	0.0725765	0.0812631	0.0123962
1455	A	0.0145794	0.0555556	0.0144865	0.0729262	0.0526177	0.0263019	0.0108589	0.0210305	0.00990688	0	0.04879	0.0198393	0.0218126	0.011798
1465	A	0.0356973	0.011012	0.0574449	0.0305764	0.0316623	0.113777	0.010021	0.0394322	0.0927386	0.0208312	0.0928591	0.0593061	0.0721371	0.0567344
1469	A	0.0195542	0.0090465	0.00972668	0	0.0179453	0.0437598	0.0283126	0.02792	0.00879353	0.0296326	0.0266762	0.0188715	0.0237023	0.0217652
1474	A	0.019115	0.00880282	0.0095048	0.0122639	0.00875503	0.0169133	0.0179019	0.00882768	0.00838715	0.0188324	0	0.0266643	0.023175	0
1476	A	0.0290501	0.0267189	0.0192437	0.0248663	0.00884721	0.0513875	0.00901226	0.0177651	0.0084868	0	0	0.0178603	0.0315781	0.0104091
1480	A	0	0	0	0.0243992	0	0.0169334	0.0505476	0.0333584	0.0319132	0.0452161	0.0161134	0.0501756	0	0.0397298
1483	A	0.0492417	0.0178731	0	0.0635001	0.00893655	0.0175639	0.188696	0.203198	0.316158	0.177096	0.15777	0.0985751	0.0659413	0.0748183
1484	A	0.019718	0	0	0.012747	0.0178907	0.0263783	0.0720266	0.0797166	0.0944368	0.0494267	0.0792184	0.0179276	0	0.0106644
1486	A	0.0602531	0	0.0294464	0.0521853	0.0182983	0.0804074	0.117679	0.116217	0.139543	0.140987	0.133523	0.135808	0.0338581	0.0428541
1487	A	0.0410509	0.0466331	0.0501002	0.0670151	0.0469175	0.0552486	0.036357	0.017942	0.0351587	0.0306937	0.00898473	0.018401	0.0960783	0.0218938
1489	A	0.0208182	0.037843	0.0608952	0.0542373	0.0853081	0.0376577	0.11655	0.132556	0.146716	0.0915937	0.097156	0.0634058	0.0539471	0.0983284
1498	A	0.101363	0.0713776	0.0560475	0.044287	0.0803294	0.0407914	0.0382409	0.02849	0.0548145	0.0437924	0.0563222	0.0958773	0.0413138	0.0705053
1506	A	0.0114705	0.0316924	0.0117536	0	0.0407	0.0414809	0.0191994	0.0191443	0.0277804	0.0219756	0.0267356	0.0094038	0.0320171	0.011655
1508	A	0	0.0104613	0	0.0303628	0.0101368	0.0103316	0	0.0194212	0.0093932	0	0	0	0.0319387	0
1522	A	0.128502	0.207317	0.186841	0.152698	0.191367	0.175112	0.180659	0.0846471	0.16444	0.123778	0.063469	0.157949	0.0948092	0.0376742
1531	A	0.0486066	0.106952	0.0464684	0.0831082	0.0851892	0.0509359	0.046014	0.0458295	0.0219034	0.041511	0.0576701	0.0518834	0.0666578	0.042337
1533	A	0.0162893	0.0306326	0.0155352	0.083212	0.0488998	0.0127324	0.011892	0.0118245	0.0225403	0.042796	0.00986875	0.0319659	0.0400481	0.0146007
1537	A	0.0470662	0.0886787	0.0902256	0.121335	0.0845206	0.0878955	0.168209	0.213828	0.433197	0.172637	0.198472	0.314023	0.129853	0.132256
1545	A	0.0816727	0.062637	0.0159388	0.0631712	0.0492187	0.0388249	0.028486	0.0425653	0.120887	0.0503187	0.0334597	0.0257732	0.0401929	0.0345543
1556	A	0.017138	0.0165975	0.033151	0.0449741	0.0259808	0.0262743	0.121909	0.0530879	0.0822639	0.101523	0.0260552	0.0160179	0.0549979	0.0646552
1561	A	0.0359389	0.0704225	0.086192	0.0958543	0.1092	0.0400588	0.109071	0.223173	0.171821	0.148968	0.0808952	0.133333	0.0410846	0.131781
1569	A	0.0178859	0.0867453	0	0.0711069	0.0985222	0.137741	0.0838504	0.0694083	0.0316456	0	0.0287315	0.102494	0.107686	0.0831774
1579	A	0	0.0177179	0	0	0	0.0151814	0	0.0161525	0	0	0.041876	0.0348614	0.0431717	0.0203874
1580	A	0.0361141	0	0.0173974	0.0239063	0.0431841	0.0294551	0.030581	0	0	0	0	0.0340832	0	0.0801282
1588	A	0.0404858	0.0622665	0.0426803	0.0285144	0.0150512	0	0	0.0181686	0	0	0.0254615	0	0.0340774	0
1589	A	0.0594648	0.061187	0	0.0556483	0.0142045	0	0.0501253	0	0.0170416	0.0586166	0.0346781	0.0282127	0.0166472	0.184035
1594	A	0.657624	0.38478	0.807684	0.290107	0.128315	0.120102	0.239153	0.248933	0.297775	0.178006	0.137159	0.094518	0.269951	0.366133
1601	A	0.0417624	0.0439367	0.0453515	0	0	0.0142613	0.0513699	0.0356316	0.0891424	0.0198965	0.0109278	0.0127129	0.033173	0.0226501
1607	A	0.0445038	0	0.0242307	0	0	0	0.0704597	0.073692	0.0917095	0.020517	0.0549209	0.0377596	0.0351	0
1614	A	0.0214225	0	0	0	0	0.0587889	0	0.0178158	0.0176149	0	0	0.011325	0	0.0448129
1619	A	0	0	0	0	0.0137306	0	0.169808	0.209864	0.208225	0.199283	0.0672753	0.0545197	0.016714	0.110889
1620	A	0	0	0	0	0	0	0.0852515	0.140573	0.157123	0.140252	0.0577534	0.0327118	0.0166583	0.111657
1623	A	0.0200401	0	0	0	0.0133869	0.0266773	0	0.018005	0	0	0	0	0.0163908	0
1630	A	0.154172	0.281974	0.276067	0.128304	0.0487686	0.0355156	0.478469	0.66461	0.774256	0.612354	0.2331	0.126103	0.0933852	0.146542
1633	A	0	0	0	0.053376	0.0123138	0	0	0	0.0528961	0	0	0.0355156	0.0311187	0
1634	A	0.0380084	0	0	0.0756048	0.0685323	0.0311107	0.190612	0.0248139	0.155561	0.0829876	0.0926498	0.146942	0.0140489	0.117199
1637	A	0.0177683	0.0362845	0.0573833	0.0475285	0.010653	0.0187793	1.72058	1.66468	1.87294	1.27864	0.0486855	0.0968471	0.0393339	2.34511
1640	A	0	0.0488838	0	0	0.0806208	0.0186602	0.0774994	0.0805585	0.142248	0	0.109605	0.142077	0.0129349	0.0333333
1641	A	0.0304507	0.015024	0	0	0.00945716	0	0	0	0.0280584	0	0.0196136	0.0216591	0	0
1647	A	0.0124782	0.0239923	0.0123411	0	0.0242581	0.0240462	0.227273	0.260552	0.3276	0.341588	0.428422	0.328061	0.0460405	0.0344828
1650	A	0.0384369	0.0122654	0	0.0175623	0	0.0166016	0.0269397	0.055417	0	0	0.0237023	0	0	0
1651	A	0.0383975	0	0	0.0175623	0.0429516	0.0331785	0	0.0277008	0	0	0.0118273	0.0130073	0.0237756	0
1661	A	0	0	0	0	0	0.043987	0	0	0.0223914	0	0.0362406	0	0.0254194	0.0594707
1663	A	0	0	0	0	0	0.00882379	0.022686	0.0227635	0	0	0	0	0.0382068	0
1664	A	0	0.0255526	0	0.0187231	0.00913159	0.0176445	0.0226193	0	0.0220897	0	0.0242954	0	0.0127275	0
1675	A	0.0274085	0.0130378	0	0.0193274	0	0.0448954	0	0	0	0	0	0	0	0
1678	A	0.0402468	0	0.0134698	0.0377644	0.0093188	0.00897747	0	0	0.0349895	0	0	0	0	0.0208551
1679	A	0.0131926	0	0	0.0184264	0.00922084	0	0	0.0181028	0.0347584	0	0.0123274	0.0127146	0.0127877	0.0206825
1695	A	0.053918	0.121739	0.0569152	0.127779	0.163021	0.0762195	0.0514933	0.0164366	0.0458856	0.0676133	0.0560852	0.0573723	0.0675068	0.0387747
1697	A	0.314651	0.322826	0.124198	0.16662	0.244275	0.182682	0.161667	0.0682477	0.126123	0.141576	0.224551	0.136591	0.23554	0.0198413
1699	A	0.648929	0.918772	1.30142	0.790514	1.31647	1.66341	0.179986	0.102023	0.140625	0.23663	0.18648	0.186393	1.81568	0.116913
1712	A	0	0	0	0	0	0.139082	0.0344768	0	0	0	0	0.0170445	0.226116	0.0175193
1715	A	0	0	0.0986193	0.165289	0.0714796	0.0704225	0.0368053	0	0	0	0.0180505	0	0.278707	0
1719	A	0.129282	0.467602	0.0958773	0.480769	0.487126	0.558269	0.036543	0.0520562	0.016239	0.0699301	0.0704722	0.0522648	0.37797	0.10987
1724	A	0.060241	0	0	0.0760456	0.065703	0	0.0549853	0	0.0164962	0.022748	0.0353857	0.0181951	0.469729	0.0575153
1731	A	0	0.113701	0	0	0.0575705	0.0658762	0	0.0218579	0	0	0	0	0.0480538	0.0480192
1735	A	0.200702	0.425985	0.062422	0.0640615	0.21097	0	0.0459242	0.0670241	0.0216591	0	0.063762	0.0233918	0.0951475	0.0248509
1745	A	0.101989	0	0	0.13947	0	0	0	0.0567376	0.0274952	0.0310655	0	0	0	0.0597193
1768	A	0	0	0	0.0704722	0	0	0	0.0252207	0.0240269	0.0307314	0	0.0711575	0.0428449	0.0705053
1781	A	0	0	0	0	0	0	0.0151699	0	0	0	0	0	0	0
1788	A	0	0	0	0	0	0	0	0	0	0	0	0	0	0
1790	A	0	0	0.0470146	0	0	0	0	0.0131441	0	0	0	0	0.0365898	0
1791	A	0	0	0	0	0	0	0	0	0.024432	0	0	0	0.0731797	0
1793	A	0.045977	0.0481928	0	0	0.0433839	0	0	0.0131303	0	0	0.0136388	0	0.0735565	0
1800	A	0.0464684	0	0	0	0	0	0	0	0	0.0176803	0	0	0	0.0143266
1801	A	0	0	0	0	0	0	0	0	0.012108	0	0	0	0	0
1806	A	0	0	0	0	0	0	0	0.0129333	0	0	0	0	0	0.0141743
1809	A	0	0	0	0	0	0	0	0	0	0	0	0	0.03663	0
1813	A	0	0.0965251	0	0	0.04329	0	0	0	0	0	0	0	0.145826	0.0284091
1815	A	0	0	0	0	0.0438596	0	0	0	0	0	0	0	0.0368596	0
1818	A	0.0485201	0.0503271	0	0	0	0.103466	0	0.0274839	0	0	0	0	0.0377501	0
1819	A	0.0485909	0	0	0	0	0	0	0.0137533	0	0.0188005	0.0145412	0	0	0
1822	A	0	0	0	0	0	0.0536769	0	0	0	0	0	0	0.0390168	0
1823	A	0	0	0	0	0	0	0	0	0	0	0	0	0.0390168	0
1824	A	0	0	0	0	0.0931966	0	0	0	0	0	0	0	0	0
1825	A	0	0	0	0	0	0	0	0.0145201	0	0	0	0	0.0394945	0.0153965
1831	A	0.567376	0.820283	0.994318	0.667302	0.315856	0.756303	3.99574	4.37173	4.44123	4.22089	4.6035	4.31219	0.785855	3.02725
1832	A	0.814996	0.764007	0.902379	0.52687	0.635145	0.371058	0.821074	0.840336	0.783208	0.825688	1.11111	0.230521	0.57554	0.244598
1834	A	0.37037	0.485437	0.285987	0.362757	0.246711	0.103627	0.0784314	0.0773694	0.108342	0.262192	0.0910332	0.103199	0.316957	0
1835	A	0.287356	0.0998004	0.294406	0	0.0853242	0.105485	0.118577	0.078125	0.073046	0	0.137994	0.052356	0.160385	0.139795
1845	A	0	0.666667	0.552486	1.53846	0	0	1.14068	0.821355	0.94697	1.36986	0.955414	2.15517	0	0.549451
1850	A	1.40845	1.63934	0	0	2.6087	1.11111	2.37154	0.833333	3.18021	1.92308	2.73973	0	0.714286	0.806452
1851	A	2.98507	0	0	0	0.884956	1.13636	1.25523	0	0	0	0	0	0	0
1859	A	0	0	0	0	0	0	0	0	0	2.04082	0	0	0	0
1860	A	0	0	0	0	0	0	0	0	0	0	0	0	0.869565	0
1863	A	0	0	0	0	0	0	1.96078	0	0	0	0	3.57143	0	0
1866	A	0	0	0	0	0	0	5.55556	3.125	9.67742	4.34783	0	8.69565	1.49254	2.63158
1869	A	66.6667	50	53.5714	33.3333	63.6364	48.1481	0	14.2857	0	0	11.1111	10	34.6154	0

## Sheet: A>G
18s location	forward strand reference base	WT NaBH4 2-NH2-d-ATP HIV	75% WT NaBH4 2-NH2-d-ATP HIV	50% WT NaBH4 2-NH2-d-ATP HIV	25% WT NaBH4 2-NH2-d-ATP HIV	WT untreated 2-NH2-d-ATP HIV	WT untreated dNTPs HIV	WT NaBH4 d2-NH2-d-ATP SSIV	75% WT NaBH4 dNH2-ATP SSIV	50% WT NaBH4 2-NH2-d-ATP SSIV	25% WT NaBH4 2-NH2-d-ATP SSIV	WT untreated 2-NH2-d-ATP SSIV	WT untreated dNTPs SSIV	WT NaBH4 dNTPs HIV	WT NaBH4 dNTPs SSIV
2	A	70	66.6667	58.6207	57.6923	72.5	73.6842	41.6667	28.5714	33.3333	66.6667	30	42.8571	65.7895	50
11	A	2.36486	2.17391	1.77665	3.05344	2.08333	3.50877	2.75862	2	2.45902	0.806452	2.60417	2.5641	1.3468	1.66667
19	A	0.890869	1.02941	1.18959	1.2685	0.594845	0.797872	0.0664673	0.0482083	0.0344947	0.0375023	0.0821288	0.0276167	1.51324	0.0592242
22	A	0.120337	0.25	0.064433	0.178094	0.115274	0.326087	0.0595415	0.0144571	0.0304739	0	0.0439883	0.0507099	0.902708	0
25	A	0.0566572	0.0585823	0	0.16835	0.109769	0	0.0138773	0	0	0	0	0.0223714	0.0841751	0.0232937
27	A	0	0.11534	0.0603865	0	0	0	0	0.0131961	0	0	0	0	0.0811688	0.0225378
38	A	0	0.0412541	0.0456621	0.349854	0.0789266	0	0.0178683	0.0173025	0.0669472	0.0769231	0.0353982	0.0108767	0	0.011217
39	A	0	0	0	0.116347	0.0394322	0	0.0267714	0.0604908	0.0191058	0.0288074	0.0176772	0.021725	0.0461894	0
40	A	0.147275	0.246305	0	0.173712	0.157109	0.492854	0.0267023	0.0344976	0.00953743	0.0191718	0.0176336	0.0541653	1.01523	0.0111907
42	A	0	0	0	0.226501	0	0	0.0170547	0.0165645	0.00918611	0.00917347	0.00846883	0	0.0448029	0.0106326
45	A	0.0708968	0.118577	0	0	0.0379939	0.0947418	0	0.0161238	0.0446229	0.00887548	0	0	0.132979	0.0208681
46	A	0.176991	0.118483	0.0441891	0.0554631	0.151573	0.0473485	0.0164528	0.0160888	0.0623441	0.0353888	0.00825355	0.0404245	0.310009	0
50	A	0.0347464	0.19084	0.130947	0.375335	0.074599	0.138696	0.0232648	0.0153362	0.0759494	0.0250125	0.0157295	0.066928	0.0431034	0.0490822
54	A	0.0334784	0	0.0854336	0.208008	0.108538	0	0.0149298	0.0148126	0.00809913	0	0.00761499	0	0.0414938	0.00934754
60	A	0	0	0	0	0	0	0	0	0	0	0	0	0	0
61	A	0.0628931	0	0.0407664	0	0.242298	0.12728	0.0283026	0.00704077	0	0.00749794	0.0215983	0	0.0392003	0.00883626
64	A	0.0959693	0.178827	0.128645	0.301811	0.145666	0.0857265	0.0352162	0.0210084	0.0844919	0.0149254	0.0143658	0.017043	0.0806127	0.0175824
68	A	0.567644	0.814159	0.903226	0.925475	0.836668	0.835771	0.0138485	0.0206313	0.0680838	0.0292612	0.042331	0.0501463	1.33543	0.0259045
77	A	0.141603	0.22089	0.116868	0.240385	0.131579	0.103484	0.0191369	0.0485296	0.0209139	0.0285252	0.00968148	0	0.221239	0.0104734
79	A	0.0580215	0.194301	0.159681	0.245499	0.102389	0.137646	0.0201552	0.0204102	0.011121	0.0399281	0.0102407	0	0.125117	0.0319557
83	A	0.17981	0.142045	0.073046	0.219058	0.0604595	0.0607349	0.0101854	0.0308071	0.0113353	0.0201147	0.0407249	0.029967	0.0288101	0.0104221
84	A	0.0515464	0.02849	0.0366166	0.0366435	0.0606244	0.0611434	0.0413993	0	0.0230654	0	0.0206441	0	0.058309	0.010543
85	A	0.0517331	0	0	0.109971	0.0304507	0.0315159	0	0.021173	0	0.0206847	0.0104341	0	0	0.0216099
91	A	0.126716	0.136085	0.150557	0.119581	0.121862	0.138427	0.0466038	0.0696298	0.0504159	0.0110889	0.0448682	0.0804043	0.165609	0.0359109
92	A	0.042008	0.0451671	0.059952	0.0890736	0.0726568	0.055142	0.0466309	0.0580855	0.0126103	0.0333037	0.0112385	0.0229674	0.0825537	0.0359497
99	A	0.0499251	0.0509597	0	0.023084	0.0182515	0	0.0134318	0.0274537	0.0280073	0.0123993	0.0258065	0.0443787	0	0.0149835
102	A	0	0.016581	0	0.0226398	0	0.0247097	0.0140588	0	0	0	0.0133797	0.0154775	0.0258065	0
103	A	0	0.0329761	0	0.0226296	0.0350508	0.0729927	0	0.0290276	0	0	0	0.0154202	0	0.0154607
104	A	0	0.0160282	0	0.0439271	0	0.0474947	0	0.0141884	0.0287439	0.0379891	0.0131165	0	0.0248201	0
107	A	0.0450924	0.0307125	0.0407	0.0414766	0.0319234	0.0219298	0	0.0225759	0.0120846	0.010543	0	0	0.0460723	0.0386598
111	A	0.0286985	0.0437254	0.0385877	0.0396668	0.0151378	0.0209556	0.0326691	0	0	0.0514933	0.020139	0	0	0.0262536
141	A	0	0.0502576	0.0320718	0.0170648	0.0496709	0.0382336	0.135329	0.160167	0.18498	0.121026	0.273758	0.183171	0.0586969	0.12826
147	A	0.0527565	0.0267451	0.0168492	0.0542594	0.0794913	0	0.0798403	0.0892567	0.0751385	0.0573865	0.0559374	0.0240993	0.062409	0.0224341
149	A	0.0136333	0.0138793	0.0173883	0.0372995	0.0412996	0.0218723	0.0645109	0.098506	0.114351	0.049743	0.0645786	0.0857318	0.0213447	0.10274
150	A	0.0273373	0.0418002	0.0870625	0.0187021	0.055325	0.043985	0.0323154	0.0328947	0.0572738	0.0498339	0.0727743	0.0245851	0.0428266	0.0573921
158	A	0.0730674	0.0303122	0.0368732	0.0605571	0.0444115	0.111458	0.364674	0.326078	0.394589	0.331435	0.283424	0.277309	0.0443853	0.33341
159	A	0	0	0.0385802	0	0.0625	0.165211	0.0560808	0.0246812	0.0569584	0.0601788	0.0163639	0.0245881	0.0467181	0.0583635
164	A	0.117199	0.0918977	0.0370508	0.0615132	0.0746491	0.0693321	0.450101	0.557147	0.483268	0.477164	0.484358	0.134093	0.0722717	0.143599
166	A	0.0996299	0	0.0179598	0.0198255	0.0570207	0.0739463	0.175871	0.168619	0.119415	0.126435	0.132567	0.012207	0.0264271	0.0253518
170	A	0.0554247	0.0564254	0.017584	0.0579934	0.0947482	0.0729217	0.844704	0.776281	0.495305	0.847195	0.642518	0.375575	0.0786576	0.44064
171	A	0	0.0285347	0.0355177	0.019516	0.0411015	0.0737826	0.12341	0.0861162	0.0629987	0.127011	0.0760167	0.0489476	0.0798509	0.0763068
173	A	0.0278009	0.0285878	0.0718907	0.0389029	0	0.0744048	0.0377893	0.0190876	0.0311624	0.0634317	0.00949848	0.0243843	0.0269906	0
175	A	0.027651	0.0571674	0.0181324	0.0767312	0.0279799	0.0744232	0.0463349	0.0281347	0.0509684	0	0.0656845	0	0.0781861	0.0489896
181	A	0.482417	0.58178	0.625217	0.77466	0.548055	0.948724	0.759047	0.735359	0.69075	0.493802	0.671259	0.661318	1.24939	0.836964
191	A	0.224349	0.227238	0.290698	0.316338	0.298107	0.355872	0.181527	0.25876	0.325369	0.147765	0.240359	0.192438	0.520833	0.100705
209	A	0.872905	0.546509	0.486421	0.531762	0.469283	0.531998	0.30083	0.299339	0.497054	0.264106	0.263286	0.204729	0.549303	0.274136
217	A	0.107481	0.0616333	0.0609088	0.144243	0.0805964	0.088574	0.101895	0.0898742	0.103049	0.0585343	0.0560852	0.0404654	0.225466	0.0600384
221	A	0.0105831	0.0305344	0.0477555	0.0386498	0.0804101	0.0575788	0.0720387	0.0908999	0.0942588	0.0472981	0.113261	0.0613999	0.110424	0.108499
224	A	0.0809342	0.0111907	0.0257003	0.0138696	0.0565739	0.0460688	0.2553	0.329272	0.30278	0.242223	0.411565	0.232531	0.1359	0.20145
226	A	0.0240761	0.0585412	0.0799148	0.0288809	0.120062	0.179211	0.229991	0.1373	0.0669728	0.0932836	0.164168	0.256829	0.238586	0.195542
229	A	0.0469428	0.068697	0.0523355	0.0989539	0.0823433	0.0585737	0.0991626	0.0441647	0.111618	0.0894112	0.0957141	0.145479	0.0851879	0.0864091
230	A	0.0234935	0.0571821	0.0130941	0.0141203	0.0353149	0.102624	0.0769569	0.110181	0.0743356	0.0636699	0.0848446	0.0783875	0.106293	0.0615536
231	A	0.105559	0.0798904	0.0785032	0.056346	0.08215	0.0732064	0.109254	0.109505	0.0555144	0.0253453	0.0738319	0.0890869	0.0423864	0.122459
232	A	0.188169	0.125973	0.144168	0.197712	0.140977	0.293815	0.174768	0.284588	0.166651	0.190428	0.105563	0.189225	0.169671	0.26908
235	A	0.0367197	0.0117911	0.0398989	0.102639	0.0119875	0.0761267	0.389953	0.286664	0.385208	0.175913	0.198391	0.391134	0.0764359	0.240674
236	A	0.184298	0.118175	0.186642	0.176991	0.144248	0.152999	0.356814	0.553825	0.512573	0.257872	0.4204	0.249911	0.1201	0.416107
244	A	0.0918414	0.114482	0.0721605	0.0932488	0.0970067	0.0871992	0.136743	0.254794	0.288953	0.224755	0.163399	0.285404	0.184014	0.408102
292	A	0.12427	0.122745	0.139276	0.192864	0.124858	0.148346	0.237018	0.231994	0.39852	0.181116	0.148618	0.0791318	0.143322	0.0752351
297	A	0.0312793	0.0407997	0.0393546	0.0806668	0.0558867	0.0389965	0.163162	0.258882	0.244998	0.135983	0.195081	0.110243	0.114718	0.133601
299	A	0.00942951	0.0372405	0	0.0243546	0.0337297	0.0938967	0.0533713	0.122936	0.121349	0.0831514	0.11746	0.116482	0.0742548	0.165107
301	A	0.028169	0.00926526	0	0	0.0251953	0.0472534	0.0179147	0.0354327	0.0325256	0.0524549	0.0677449	0.0498902	0.0106998	0.0564717
302	A	0.0562957	0.0555658	0.0956823	0.0243427	0.0587643	0.0472478	0.0536145	0.0530504	0.0486184	0.0418804	0.0253336	0.0598384	0.117572	0.0451569
313	A	0.269984	0.252975	0.156797	0.480769	0.179135	0.288004	0.205071	0.13947	0.240944	0.219756	0.234255	0.198763	0.26927	0.134606
318	A	0.0821543	0.0528076	0.0341608	0.0694203	0.0245499	0.0939077	0.12418	0.193084	0.246776	0.167172	0.112243	0.104493	0.0834812	0.231857
336	A	0.107907	0.103345	0.0468494	0.144683	0.0512733	0.0731172	0.0432152	0.0516262	0.0853309	0.020377	0.0595441	0.010247	0.0307598	0.0563825
339	A	0.0797448	0.0190277	0.035545	0.0612595	0.0433576	0.0747384	0.113666	0.0610501	0.118054	0.0615258	0.0517375	0.104778	0.0942705	0.0569476
343	A	0.0196696	0.00940468	0.0578035	0.036346	0.025729	0.0369914	0.00839701	0.00837942	0.037853	0	0	0.0304075	0.031312	0.0437589
348	A	0.0567644	0.0456163	0.0447628	0.0351041	0.0853024	0.0249159	0.0398724	0.0796305	0.0575498	0.0374181	0.0716161	0.00963855	0.0733368	0.0615006
349	A	0.0475692	0.100899	0.112651	0.047142	0.0772665	0.112317	0.120463	0.152305	0.224443	0.112877	0.144046	0.0964878	0.157978	0.123203
360	A	0.23015	0.0994742	0.240757	0.105634	0.242866	0.132363	0.381275	0.391245	0.383562	0.230527	0.433129	0.223773	0.246873	0.232198
363	A	0.0143164	0	0.0340948	0.0523469	0.0759417	0.0435635	0.0101153	0.0199521	0.0173777	0	0.0200702	0.0861538	0.0968054	0.0243546
364	A	0.0479004	0.0310752	0.0185219	0.115053	0.0332281	0.0911577	0.0106508	0.0209052	0.0180424	0.0121315	0	0	0.0172058	0.0630756
371	A	0.0382555	0.0186811	0	0.0465116	0.0609756	0	0.0707631	0.0812253	0.193621	0.013224	0.129855	0.0561877	0.0796654	0.0410116
376	A	0.0414938	0.0820681	0.0717017	0.0501128	0.0844773	0.0930233	0.117661	0.080981	0.111834	0.0654622	0.0589206	0.0995874	0.0626566	0.068306
389	A	0	0.0535332	0.0972447	0	0.0295334	0.156617	0.03828	0.0127129	0.0115367	0.0279681	0.0257832	0	0.100452	0
392	A	0	0.0804505	0.130506	0.0313873	0.0295858	0	0.104031	0.0909091	0.187926	0.0570695	0.0654536	0.0956633	0.0505306	0.0295029
398	A	0.218818	0.177126	0.149343	0.150015	0.110926	0.145085	0.186312	0.17284	0.266046	0.124001	0.101074	0.0900225	0.167987	0.10139
401	A	0.226929	0.105485	0.375352	0.531582	0.144175	0.266972	0.271178	0.192555	0.311886	0.184764	0.393908	0.216718	0.380325	0.117942
408	A	0.559128	0.735086	0.900901	0.748554	0.508069	0.617522	0.462703	0.638889	0.725283	0.391979	0.960987	0.6078	0.563003	0.570776
414	A	0.108672	0.174825	0.242392	0.329852	0.159635	0.164339	0.433231	0.402718	0.433787	0.256757	0.459397	0.291411	0.1417	0.255791
415	A	0.180397	0.0797607	0.0493949	0.153492	0.0209864	0.175968	0.186474	0.184049	0.154248	0.132626	0.290928	0.270311	0.183486	0.278087
418	A	0.138206	0.0602864	0.0749064	0.0995025	0.0813008	0.0197902	0.145691	0.166908	0.173894	0.25535	0.146288	0.232654	0.0754717	0.38615
426	A	0.0519211	0.0303459	0.012458	0.0273673	0.0110096	0.0556715	0.0311268	0	0.0209271	0.0227144	0.0358081	0.027401	0.0463017	0.0126646
433	A	0.136893	0.151329	0.0909711	0.205497	0.167084	0.0929121	0.330647	0.387313	0.471204	0.250199	0.512195	0.220295	0.255414	0.215272
435	A	0.0498405	0.0767239	0.0345423	0.0789578	0.0750751	0.0945818	0.10717	0.163541	0.227889	0.176325	0.294683	0.228474	0.113546	0.208741
439	A	0.080048	0.067037	0.080266	0.118781	0.107078	0.189189	0.273224	0.192513	0.311761	0.219857	0.321709	0.46397	0.11439	0.210499
445	A	0.0678163	0.0370268	0.0662179	0.0513875	0.0312761	0.0130361	0.182429	0.156174	0.0998801	0.094518	0.18031	0.135428	0.0552547	0.146789
447	A	0.0187846	0.0267261	0.0105619	0.0247586	0	0.0125047	0.055061	0.00941442	0.0486855	0.0303921	0.0232099	0.0519683	0.042603	0.0117509
448	A	0.027959	0.0354076	0.010513	0.0123107	0.0601624	0.0747198	0.0544959	0.0373552	0.0968054	0.0503221	0.0345742	0.0645078	0.0743889	0.0931966
449	A	0.0278629	0.0353139	0.0419727	0.0489956	0.01999	0.0497636	0.0272084	0.046607	0.0773022	0.0401566	0.0344986	0.0645578	0.0318674	0.0232666
455	A	0.064905	0.0443577	0.0535045	0.0122459	0.10102	0.0251099	0.280061	0.197926	0.353392	0.149447	0.208502	0.103479	0.107285	0.114508
458	A	0.0462107	0.0443971	0.0642467	0.0244588	0.0301629	0.0375281	0.00867077	0.0273748	0.0856409	0	0.022424	0.0252525	0.0106508	0
460	A	0.00923958	0.0177683	0.0427716	0.0366838	0.0100462	0.049975	0.0341822	0.0180261	0.141656	0	0.0554816	0.0624064	0.0425125	0
464	A	0	0.00886918	0.0320993	0.0366569	0.01001	0.0124564	0.0901492	0.0605694	0.146132	0.0914662	0.106078	0.0484379	0.0529886	0.0212224
465	A	0.0277572	0.0177778	0	0.0367963	0.0802729	0.0618506	0.164069	0.112457	0.265106	0.137137	0.127253	0.120351	0.105597	0.0947668
468	A	0.019064	0.00922339	0.0221951	0.0379987	0.0313611	0.0384172	0.200837	0.336879	0.333587	0.217371	0.382347	0.33321	0.0999667	0.260191
469	A	0.0866718	0.0278836	0.0671817	0.101755	0.0527259	0.090276	0.229807	0.208069	0.271897	0.13419	0.267588	0.262434	0.0783611	0.186813
473	A	0.201101	0.193266	0.280556	0.305428	0.267847	0.260116	0.432082	0.550087	0.542288	0.312626	0.346434	0.656007	0.278481	0.409441
476	A	0.441842	0.446002	0.437524	0.543478	0.584359	0.515625	0.743661	0.79059	1.00811	0.659275	0.783848	0.683434	0.507823	0.605987
484	A	0.44619	0.312446	0.311526	0.421006	0.587401	0.473037	0.365144	0.437894	0.569705	0.257926	0.408998	0.337441	0.447036	0.259841
485	A	0.0361076	0.105356	0.0419551	0.112133	0.123482	0.143644	0.178147	0.192596	0.19054	0.129576	0.10259	0.176678	0.0982898	0.103681
486	A	0.181587	0.017696	0.0423998	0.0225938	0.104232	0.121743	0.0198728	0.02148	0.0677048	0.0326158	0.0386349	0.0442347	0.099226	0.013009
489	A	0.329248	0.41263	0.474752	0.591581	0.403311	0.22596	0.274887	0.253673	0.254989	0.205161	0.266261	0.394103	0.653195	0.193498
493	A	0.389984	0.410509	0.490449	0.744544	0.691871	0.451287	0.352907	0.336629	0.366178	0.215773	0.285218	0.336276	0.608431	0.137569
500	A	0.263158	0.388802	0.499625	0.728897	0.294251	0.455199	0.12535	0.197814	0.234892	0.14757	0.139958	0.219667	0.991061	0.13905
508	A	0.543386	0.614162	0.455166	0.925731	0.453649	0.604671	0.177886	0.19305	0.230276	0.122926	0.145089	0.303222	1.02073	0.287455
512	A	0.25974	0.201244	0.317893	0.25652	0.219736	0.267435	0.133359	0.123254	0.199661	0.124896	0.179978	0.228949	0.243272	0.0927536
516	A	0.215232	0.261233	0.188442	0.142857	0.432982	0.18263	0.241206	0.256602	0.436228	0.162778	0.24447	0.0807863	0.284772	0.112261
519	A	0.0980873	0.170961	0.153353	0.0893788	0.168722	0.0966184	0.408322	0.458762	0.354372	0.360156	0.371422	0.318937	0.142789	0.307996
520	A	0.0607386	0.0606428	0.0413907	0.0884564	0.0514469	0.111076	0.510956	0.606559	0.501688	0.487856	0.539588	0.454485	0.199976	0.643883
521	A	0.0120525	0.0120221	0	0.0438789	0.0255232	0.0155521	0.118847	0.228833	0.0682062	0.125971	0.12229	0.161312	0.0464954	0.0999625
522	A	0	0.0240674	0.0271739	0.0146499	0.012721	0.0465911	0.0401163	0.021077	0.0686881	0	0.0450958	0.0542226	0.0115915	0.012596
523	A	0	0	0	0.0145497	0.0126103	0.0308928	0.0200884	0.0105708	0.00982898	0	0	0.0134844	0.0460936	0.0125031
525	A	0.0113895	0.0226475	0	0.0138889	0.0119646	0	0.010008	0.021097	0	0.031679	0.0339789	0	0.0110705	0.0126374
526	A	0.0113392	0.0112271	0.024947	0.0137684	0.0356125	0.029347	0.0301326	0.0424403	0.0197239	0.0212179	0.0114038	0.027356	0.0220848	0.0127421
528	A	0.0448129	0.0110254	0.0244708	0	0.0232829	0.0146994	0.0300873	0.0849979	0.0987849	0.0745633	0.022865	0.0962199	0	0.0514999
529	A	0	0.0219419	0	0.0136184	0.0115727	0.0287646	0	0.0419683	0.0292141	0.0210682	0.0451722	0.0406119	0.0326371	0.0381049
531	A	0.154696	0.0433981	0.0598946	0.16225	0.0915751	0.0427411	0.0992753	0.16835	0.184951	0.0952986	0.0790335	0.0405351	0.0753498	0.0381534
533	A	0.0305655	0.0396354	0.021699	0.0371655	0.0416493	0.055241	0.243784	0.196993	0.163745	0.227743	0.153982	0.0670421	0.0316289	0.151286
536	A	0.0749304	0.0519319	0.0221902	0.0526454	0.0426803	0.0575954	0.153484	0.119474	0.129702	0.107608	0.0687443	0.126886	0.0550661	0.0662866
545	A	0.242284	0.193562	0.283039	0.194957	0.371156	0.345373	0.124481	0.112969	0.14051	0.0979752	0.0593261	0.16028	0.325486	0.120935
554	A	0.0420566	0.0300601	0.0211551	0.0129132	0.0104428	0.0283688	0	0.0314597	0.020139	0	0.0111086	0.014241	0.0532141	0.0130822
555	A	0.0104581	0.03998	0.0634048	0.0258264	0.0415973	0.0845785	0.0289771	0	0	0.0101771	0.0109637	0	0.0633179	0.0636862
560	A	0.0705006	0.0479157	0.0405145	0.0497946	0.10013	0.0274424	0.045901	0.0399082	0.0389219	0.0192511	0.0209952	0.0662954	0.0922131	0.0122011
561	A	0.0302358	0.0192012	0.0203273	0.0249626	0.0705006	0.0275179	0.00914746	0.0198275	0.00971157	0.0191883	0.0104417	0	0.0512243	0
564	A	0.0210571	0.0100533	0.0426485	0.0130531	0.0105943	0.0150083	0.109279	0.0980072	0.117962	0.0718022	0.0679271	0.0578202	0.0453155	0.0261165
569	A	0.019974	0.0192641	0.010469	0.0122579	0.0203459	0.0286369	0.204519	0.248005	0.385081	0.228651	0.200044	0.186487	0.03292	0.155844
574	A	0.00999101	0.0193125	0.0106	0	0.0101678	0.028931	0	0	0.0337458	0	0	0.0140746	0.0111857	0.0127551
575	A	0.02003	0.0193536	0.0320444	0.0122175	0	0.0289687	0.0095648	0.0321647	0	0.0195065	0.0219756	0.0139528	0.0223914	0.0378501
576	A	0.0297089	0.00961631	0.0213447	0.0121448	0.0101781	0.0719217	0.00891902	0	0.0202102	0.0275154	0.020404	0	0.022119	0.0230627
583	A	0.0565611	0	0.0129483	0.0701459	0.0372255	0.0346141	0	0.0306937	0.106213	0	0.0956226	0.013113	0.0131648	0.0118666
584	A	0.0351617	0.0237023	0.0134807	0.0290149	0.0774593	0.0366838	0.0463994	0.104047	0.0429461	0.0667557	0	0.0666667	0.0685589	0.0481928
587	A	0.118469	0.133107	0.138064	0.233952	0.0922266	0.0932488	0.0623441	0.0397101	0.0824402	0.0636595	0.030722	0.0475003	0.110375	0.044287
590	A	0.0121065	0.0865908	0.113443	0.118536	0.0804613	0.173544	0.0358166	0.029973	0.0831514	0.0275938	0.0310142	0.0714031	0.0569152	0.0891663
594	A	0.0137457	0.0428388	0.0165207	0.0506329	0.0471846	0.0414852	0.0186254	0.0312272	0.0107666	0	0.0216286	0.0366032	0.0448096	0.0229305
599	A	0.56164	0.452027	0.454775	0.361135	0.619539	0.221106	0.252454	0.364659	0.455508	0.194024	0.421303	0.3396	0.286944	0.251889
604	A	0.356849	0.326309	0.419646	0.429397	0.353757	0.395612	0.339719	0.351858	0.346056	0.332193	0.290917	0.239177	0.351494	0.505108
605	A	0.164226	0.0944669	0.231303	0.213851	0.294035	0.215479	0.217268	0.269598	0.122436	0.20558	0.172992	0.143954	0.297217	0.265007
616	A	0.118793	0.193204	0.316108	0.100777	0.261215	0.319675	0.194666	0.258676	0.31569	0.232817	0.263562	0.238777	0.247036	0.104215
619	A	0.20915	0.0867948	0.299088	0.0624902	0.264423	0.211385	0.225844	0.201849	0.134242	0.211461	0.121681	0.280767	0.342601	0.188213
628	A	0.109334	0.186127	0.260989	0.0651997	0.151368	0.0774994	0.153183	0.151653	0.0923532	0.0862534	0.0930329	0.106236	0.120693	0.0889581
629	A	0.0409836	0.0123854	0.0411241	0.0488998	0	0.0514867	0.00958773	0.0101348	0.0276855	0.0216099	0	0.0319489	0.0655093	0.0111396
634	A	0.0667408	0.070267	0.100056	0.159723	0.0973451	0.236206	0.177904	0.204309	0.187123	0.100381	0.122815	0.13789	0.177276	0.176825
640	A	0.0963206	0.10555	0.125604	0.102529	0.106561	0.0818398	0.32664	0.221172	0.232601	0.209228	0.152269	0.186819	0.0636762	0.205198
641	A	0.229995	0.271287	0.183238	0.11288	0.265634	0.237122	0.242954	0.142262	0.179043	0.0666149	0.245424	0.292642	0.374558	0.206778
643	A	0.0745573	0.068417	0.094509	0.0877097	0.0965466	0	0.106034	0.141271	0.196758	0.110558	0.16242	0.062422	0.0279525	0.0911993
648	A	0.0922594	0.0847817	0.0749274	0.14172	0.0804505	0.0636639	0.703094	0.535264	0.738467	0.589119	0.608413	0.409883	0.0490471	0.331695
650	A	0.00922339	0.0169391	0.0186794	0	0.0145794	0.0237756	0.0101399	0.0105574	0	0.0116822	0.0105396	0.0228624	0.0628185	0.0122835
653	A	0.0091954	0.0253079	0	0.0217746	0.06526	0.0315308	0	0.0104603	0.0192363	0.0231669	0	0.0112892	0.0347608	0.0121477
654	A	0.0184043	0.0253079	0	0.0326691	0.0290086	0.0157803	0.0201918	0.0104734	0.00963855	0	0.0104624	0.0226989	0.0487363	0.0365631
655	A	0.12883	0.12639	0.315926	0.19595	0.195865	1.89066	0.0201066	0.0624675	0.00959877	0.0115567	0.0416146	0.135227	1.76905	0.0848794
664	A	0.340136	0.30482	0.32666	0.471527	0.337079	0.214832	0.31736	0.249053	0.230415	0.225875	0.268817	0.325331	0.216735	0.201689
668	A	0.0110767	0.0620861	0.0111694	0.0387497	0.0341122	0.0270343	0	0.0209052	0.00975895	0.04914	0.0313972	0	0.0475813	0.0121595
669	A	0	0.0631912	0.045254	0.0261097	0	0.0628536	0.0101327	0.0102564	0	0.0120802	0.0102902	0	0.0632411	0
670	A	0	0.0105519	0	0.0393288	0.0518717	0.0270222	0.0302389	0.0101843	0.0191773	0	0	0.0104921	0.0395507	0.0233754
671	A	0.0229911	0.0107852	0.0465983	0.0670062	0.0442674	0.0275204	0.0306122	0.061894	0.0678558	0.0486796	0.0308992	0.0317528	0.0802311	0.0355282
672	A	0.553633	0.519762	0.549386	0.592752	0.57891	2.72034	0.0510152	0.0617856	0.0970591	0.1221	0.0823045	0.42252	2.97979	0.392297
679	A	0.0495602	0.0589136	0.0374953	0.0289603	0.047533	0.0405721	0.236845	0.308198	0.262569	0.224495	0.190782	0.17762	0.0704784	0.2191
685	A	0.104822	0.087108	0.10983	0.108797	0.0725765	0.0771095	0.407024	0.393382	0.46828	0.318825	0.415824	0.406654	0.195523	0.45977
693	A	0.170524	0.125815	0.177126	0.249596	0.144118	0.273134	0.220546	0.0913138	0.159526	0.149701	0.0663864	0.14116	0.354017	0.206612
715	A	0.033428	0	0.0372752	0.0615322	0.0339259	0.0602455	0.0329453	0.0215401	0.0559097	0.0736467	0.0206825	0.0107262	0.064914	0.0606796
720	A	0.0253593	0.0238588	0.0378358	0.0517545	0.0275103	0.0152625	0.011526	0.067446	0.0237361	0.0503398	0.010866	0.127773	0.0523903	0.0893085
724	A	0.00855359	0.0241119	0.0191957	0.0209556	0.00699301	0.00770891	0.0118934	0.0582411	0.0124085	0.0516462	0.0340368	0.0121477	0.0131848	0.0525072
763	A	0.112518	0.0575374	0.17331	0.10274	0.142735	0.343938	0.198413	0.0724813	0.0770812	0	0.0753012	0.102494	0.30722	0.176471
771	A	0.0290192	0.0290613	0.0316957	0.109329	0.0238436	0.123487	0.0214316	0.04302	0.0450248	0	0	0.0301205	0.0188893	0
776	A	0.0188466	0.0533428	0.0757289	0.0488043	0.0930233	0.0323206	0.0189538	0.0192382	0.0405351	0.0582864	0.0784468	0	0.0773694	0.0730282
794	A	0.0855706	0.0990099	0.0422119	0.135483	0.0572269	0.041806	0.0222767	0.0453412	0.0843577	0.0726216	0.0112322	0.0366972	0.0351099	0.0393185
795	A	0.0837784	0.0579486	0.0308071	0.0658588	0.0239025	0.0411963	0.0326548	0.0443902	0.0472646	0.0479214	0	0.0241663	0.0485168	0.0650026
802	A	0.0331785	0.0231339	0.0248488	0.0209424	0.0193237	0.0340113	0.049985	0.0615827	0.111049	0.0885152	0.0508958	0.021889	0.0171331	0
808	A	0.112994	0.0638026	0.0925783	0.0760601	0.0542594	0.0960922	0.0470544	0.0484121	0.158028	0.0621762	0.0193461	0.0206911	0.101822	0.0653666
809	A	0.0448029	0.0422833	0.0536645	0.0282965	0.0179662	0.0509554	0.0559336	0.0383656	0.0835946	0.0410046	0.0287936	0.0205613	0.0640478	0.0432152
810	A	0.0523482	0.0141024	0.0153315	0.0282939	0.0239808	0.0446002	0.0467159	0.0287742	0.083875	0.0513611	0.00959233	0.0514562	0.0587827	0.0433416
811	A	0.0372578	0.0210926	0.0152894	0.0282141	0.0238777	0.0381243	0.0185357	0.038157	0.0731988	0.0204269	0.0190876	0.0306592	0.0106553	0.0107724
812	A	0.0223081	0.0280919	0.0458786	0.0281875	0.00596481	0.0443768	0	0.00951384	0.0313185	0	0.00951656	0	0.0265943	0
813	A	0.0148655	0.04212	0.0305764	0.0281981	0.00596872	0.0190114	0.018486	0.0190404	0.0313545	0.0101978	0.028566	0.010176	0.0637959	0.0428954
816	A	0.0522583	0.0775085	0.0307479	0.0567215	0.0599341	0.0639672	0.057018	0.0877022	0.160737	0.0627812	0.157698	0.0209666	0.043136	0.0547645
818	A	0.0447294	0.0422119	0.0690025	0.0847777	0.029994	0.0256033	0.0497166	0.173346	0.124406	0.0652742	0.0829876	0.0958058	0.0864538	0.0444395
825	A	0.0297066	0.0349822	0.0309215	0.0376435	0.0182693	0.0321875	0	0.0104526	0.127788	0.032996	0.0542064	0.0526316	0.0602476	0.0321302
826	A	0.097737	0.0282785	0.0624658	0.0950661	0.0555418	0.111461	0.0617347	0.0538967	0.05978	0.0679117	0.0782648	0.0749625	0.0332926	0.0434783
827	A	0.332276	0.326797	0.470219	0.32483	0.415684	0.421025	0.0622342	0.163043	0.240674	0.102834	0.123888	0.128908	0.350409	0.152555
830	A	0.345965	0.395648	0.455312	0.326964	0.387412	0.390165	0.39141	0.383772	0.433422	0.277778	0.387464	0.474352	0.483361	0.357902
837	A	0.29827	0.396672	0.304613	0.462269	0.336671	0.401269	0.252803	0.284998	0.400485	0.203544	0.295264	0.340376	0.383712	0.268974
847	A	0.0456152	0.0226014	0.0938841	0.0729714	0.0545554	0.168797	0.0661551	0.0411579	0.0987863	0.042511	0.0300842	0.0645891	0.0625782	0.044991
849	A	0.114771	0.136224	0.107527	0.102579	0.131854	0.133967	0.0938086	0.111235	0.2288	0.0716332	0.0764877	0.131817	0.0953087	0.0909918
854	A	0.70688	0.795694	0.827016	0.705738	0.983194	0.815112	1.51415	1.45773	1.19648	1.23262	1.66336	1.58238	0.703746	1.00873
858	A	0.0944584	0.110567	0.172712	0.146077	0.163559	0.0344828	0.642148	0.641809	0.884818	0.471846	0.476839	0.706582	0.274935	0.632385
861	A	0.0992556	0.149278	0.100503	0.0661084	0.0868961	0.0378143	0.161646	0.170861	0.188561	0.174354	0.0696136	0.0582637	0.0504626	0.156413
862	A	0.0645369	0.0643708	0	0.0431499	0.0169693	0.12599	0.114466	0.105708	0.0615669	0.0925069	0.0510551	0.0922679	0.122044	0.179416
864	A	0.0635223	0.0157431	0.0561167	0.0424538	0.083654	0.0525026	0.0564175	0.119065	0.122212	0.0455719	0	0.16	0.0594001	0.0637146
865	A	0.0461609	0.0612651	0.054615	0.14433	0.130698	0.0690012	0.151745	0.101523	0.104948	0.148898	0.0811425	0.0349223	0.0437956	0.140252
869	A	0.1001	0.155763	0.0338811	0.118203	0.0798467	0.0889047	0.268926	0.338792	0.320934	0.279494	0.381801	0.327586	0.104043	0.265211
870	A	0.0851789	0.0702741	0.117964	0.0588582	0.079783	0.0708717	0.495646	0.42206	0.377797	0.48508	0.539768	0.667465	0.117925	0.526316
872	A	0.0422773	0.0691085	0.0826037	0.116618	0.0794913	0.12396	0.0802998	0.25203	0.186916	0.207009	0.207204	0.10304	0.0443262	0.0773395
875	A	0.0506842	0.0488938	0.116891	0.0872905	0.115042	0.0801667	0.201461	0.18477	0.26976	0.124361	0.253089	0.32629	0.10721	0.281294
886	A	0.0369458	0.0353066	0	0.0170358	0.0138427	0	0.012222	0.10433	0.0988997	0.0949024	0.111872	0.0618735	0	0.0607312
903	A	0.0483325	0.0584385	0.0139548	0.0165481	0.0135704	0.0625782	0.225279	0.297177	0.210188	0.0642756	0.121687	0.178359	0.0127796	0.0814143
904	A	0.0606428	0.0470256	0.0562035	0.0498008	0.0546224	0.0942359	0.118892	0.173332	0.124224	0.0902294	0.0810482	0.0713352	0.128172	0.0928613
908	A	0.0618582	0.203739	0.129255	0.237449	0.154516	0.0968054	0.367943	0.582709	0.586475	0.32758	0.676731	0.276976	0.0910984	0.203
913	A	0.0824063	0.105277	0.175523	0.186741	0.128061	0.262074	0.322615	0.285714	0.386639	0.420067	0.387503	0.222792	0.232964	0.272688
916	A	0.041917	0.0538141	0.0821828	0.0570451	0.0164718	0.11583	0.107805	0.0992392	0.0644468	0.0842663	0.0853554	0.0764526	0.0601052	0.05392
919	A	0.153012	0.0806668	0.0494641	0.170713	0.182512	0.115163	0.14626	0.191042	0.156071	0.12828	0.236323	0.146874	0.0900495	0.0513875
920	A	0.390898	0.498451	0.496278	0.418649	0.465503	0.46341	0.450262	0.359674	0.290456	0.373134	0.613063	0.387353	0.362922	0.399018
922	A	1.05461	1.10722	1.055	1.12337	1.15877	0.463646	0.714133	0.835118	0.670649	0.739063	0.707943	0.603643	0.760851	0.484392
926	A	0.663871	0.805524	0.430858	1.05411	0.776144	0.804598	0.627726	0.552956	0.532187	0.498516	0.744566	0.59253	1.00309	0.474834
938	A	0.325677	0.252525	0.256057	0.445293	0.209764	0.316706	0.357001	0.290248	0.220386	0.43985	0.401476	0.312466	0.394024	0.373212
944	A	0	0.0153304	0.0355303	0.0582524	0	0.0183993	0.048605	0.0476327	0.036533	0.0319966	0.0320787	0.0316857	0.060006	0.0101358
955	A	0.395648	0.312012	0.267201	0.416998	0.319489	0.224635	0.107296	0.150249	0.158353	0.119086	0.189573	0.138078	0.274386	0.110608
957	A	0.180505	0.357032	0.282111	0.493389	0.281215	0.131258	0.117474	0.0660004	0.168127	0.0869849	0.169223	0.0535848	0.192678	0.0610749
962	A	0.0298063	0.0842578	0	0.0899119	0.0170736	0.0511247	0.240021	0.121602	0.145572	0.0888099	0.14573	0.100888	0.0816136	0.161168
963	A	0.0297133	0.0700673	0	0.0717875	0.0170213	0.118303	0.088881	0.11274	0.0888315	0.0984737	0.0873447	0.110287	0.0461361	0.0565984
964	A	0.029634	0.0559754	0.0148765	0.0179147	0.0169837	0.101249	0.0534807	0.00870928	0.0323808	0.00986291	0.00975134	0	0.0574119	0.0283447
972	A	0.240269	0.249773	0.155745	0.33372	0.193157	0.265569	0.128988	0.176693	0.250411	0.12218	0.186951	0.278577	0.217352	0.201172
980	A	0.152749	0.250096	0.0931195	0.256035	0.10582	0.141593	0.0730105	0.0478011	0.0145571	0.0621946	0.0707151	0.0918442	0.107678	0.0259471
981	A	0.102208	0.0483325	0.0726141	0.171107	0.047009	0.0820826	0.0493502	0.0977119	0.0590842	0.0452776	0.04496	0.00932401	0.0983687	0.0612799
983	A	0.172778	0.146333	0.118367	0.254247	0.164871	0.199778	0.136174	0.190522	0.18816	0.122764	0.168127	0.119299	0.102483	0.102757
987	A	0.199896	0.216558	0.110998	0.255754	0.27204	0.217662	0.358664	0.277924	0.537523	0.242414	0.378915	0.33984	0.238131	0.316687
990	A	0.0818405	0.0698629	0.136692	0.178651	0.0953491	0.172451	0.185114	0.22519	0.221999	0.14748	0.1753	0.252936	0.206865	0.108932
992	A	0.0379147	0.118884	0.0619323	0.116212	0.189141	0.124406	0.133469	0.142676	0.168511	0.0704225	0.0991527	0.120515	0.0869703	0.118233
996	A	0.0897827	0.0612638	0.0802649	0.0554754	0.0539665	0.0884564	0.0950501	0.119278	0.150985	0.170441	0.102145	0.141593	0.0938527	0.142937
997	A	0.0178987	0.0173762	0.0597015	0.0220361	0.0856348	0.0879894	0.0711491	0.0939035	0.0867708	0.0943841	0.0574996	0.11155	0.0935162	0.076929
998	A	0.116791	0.148071	0.10004	0.0663937	0.0966287	0.276274	0.120644	0.079188	0.0932277	0.0705716	0.0983043	0.1534	0.282353	0.129969
1001	A	0.0359454	0.00872829	0	0.0110558	0.0324289	0.0108413	0.027287	0.0205747	0.0127527	0.0226895	0.0233845	0.023819	0.0155533	0.0728067
1008	A	0.0348159	0.0430145	0.0300511	0.0326691	0.0321647	0.0113186	0.208157	0.190027	0.235351	0.123206	0.148633	0.200277	0.0403031	0.176019
1009	A	0.043482	0.0601633	0.0601082	0.0326584	0.0214179	0.034118	0.22623	0.254039	0.294826	0.187374	0.214259	0.15341	0.0483481	0.18178
1011	A	0.0705965	0.0349375	0.0306874	0.0332447	0	0.0343879	0.0462626	0.0334538	0.0248679	0.0148203	0.00756888	0.02331	0.0408463	0.0214179
1012	A	0	0.00871764	0	0	0.0325274	0.0571821	0.0329207	0	0.00619348	0.00738662	0	0.00773455	0.0326078	0.0284252
1020	A	0.0175239	0.00872829	0.0101781	0.0221558	0.0323799	0.0332816	0.00629802	0.0257815	0	0.00708215	0.00722335	0.0141513	0.0247239	0.00655695
1023	A	0.0352703	0.0263597	0.0307535	0.0445038	0.0325804	0.0340368	0.0128041	0.0065304	0.0122526	0.0143637	0.00730247	0.0216513	0	0.0200897
1024	A	0.0264178	0.0262996	0.0306937	0.0333519	0.0650407	0.0562556	0.0767509	0.00652103	0.0367175	0.0215115	0.0437286	0.014404	0.0681721	0.00667379
1027	A	0.0839944	0.0186898	0.0874604	0.0467782	0.0679579	0.121847	0.150632	0.193527	0.227115	0.145836	0.199571	0.241652	0.0559076	0.240997
1028	A	0.13235	0.094518	0.133407	0.0475737	0.10327	0.148386	0.211977	0.282981	0.26168	0.346633	0.291001	0.215774	0.113314	0.0980118
1030	A	0.0379363	0.0189555	0.0565163	0.0598731	0.0696541	0	0.286162	0.300531	0.345354	0.192382	0.211218	0.254251	0.104226	0.198895
1031	A	0.0567698	0.0567967	0.0565611	0.0239722	0.0581125	0.0503461	0.17175	0.197239	0.201261	0.147298	0.126863	0.111812	0.0565718	0.110996
1034	A	0.114646	0.104772	0.13587	0.145773	0.163037	0.0981595	0.246519	0.188048	0.296936	0.242829	0.281933	0.287759	0.129211	0.221888
1035	A	0.0267977	0.0266643	0.0737308	0.057019	0.088388	0.0941509	0.124517	0.164204	0.11307	0.112309	0.0924214	0.0918836	0.0966693	0.127542
1036	A	0.0895175	0.124433	0.147664	0.113986	0.0884858	0.164551	0.105042	0.089427	0.0866898	0.0676183	0.0617379	0.130478	0.24583	0.0780751
1042	A	0.314296	0.422721	0.185586	0.368664	0.389495	0.50694	0.422105	0.45002	0.474535	0.501497	0.364797	0.50902	0.486941	0.66417
1049	A	0.0209096	0.0100231	0.0567601	0.0400427	0.0637918	0.0534974	0.0859107	0.0743605	0.0872537	0.0734934	0.0409937	0.0320359	0.039285	0.0686289
1050	A	0.0104351	0.0501052	0.0453052	0.0533903	0.0889793	0.0131562	0.0576743	0.0748055	0.10279	0.107287	0.0246589	0.0555776	0.0969744	0.0757289
1052	A	0.031384	0.0503423	0.0457195	0.0401714	0.0511378	0.0668181	0.0293707	0.114312	0.0450857	0.0421088	0.0252101	0.0738977	0.0394089	0.0634971
1055	A	0.0102997	0.0891795	0.0113934	0.0659892	0.0495602	0.0256772	0.145518	0.151355	0.0834851	0.100705	0.142546	0.104443	0.0673725	0.14771
1058	A	0.0315027	0.0406793	0.0469373	0.0134354	0	0.0520156	0.181132	0.238209	0.361465	0.20284	0.351958	0.305862	0.0873617	0.26431
1060	A	0.0103327	0.0600721	0.0580855	0.0262502	0.0495172	0.0649435	0.170953	0.263526	0.442087	0.137174	0.212569	0.191536	0.0483559	0.158006
1062	A	0.0406711	0.0393972	0.0917116	0.0643252	0.0488998	0.0255591	0.180265	0.298013	0.152684	0.111359	0.15083	0.110865	0.0566626	0.115978
1070	A	0.00937031	0.0182715	0	0.0472701	0.01153	0	0.0235497	0.0249169	0.0323258	0.00924214	0	0.0560119	0.0180668	0.0179565
1077	A	0.0270416	0.0263759	0.0313545	0.0226809	0.0779336	0.0357824	0.234742	0.248097	0.240007	0.189125	0.333595	0.224041	0.0528541	0.140384
1080	A	0.0281452	0.0458043	0.0219419	0	0	0.0374953	0.0174155	0.0182498	0.0885661	0.0306937	0.0846561	0.0318269	0.04662	0.0508958
1082	A	0.00897263	0.0175917	0.0105086	0.0225657	0.0659413	0.011805	0.0330825	0.043501	0.0678426	0.0585023	0.101297	0.0803859	0.0357015	0.0481139
1083	A	0.070373	0.0860511	0.0619195	0.0440917	0.064433	0.0461467	0.0733437	0.18077	0.0501882	0.0481881	0.0300451	0.059453	0.0263945	0.0567805
1084	A	0.096848	0.103288	0.051717	0.0551207	0.0536999	0.116904	0.130357	0.0602151	0.0668282	0.0385134	0.06003	0.0397733	0.0888494	0.0475195
1087	A	0.204101	0.153679	0.14109	0.18596	0.283672	0.174259	0.228523	0.287615	0.285912	0.170119	0.220727	0.250313	0.219885	0.177918
1093	A	0.377675	0.295918	0.298768	0.510605	0.332949	0.451786	0.639458	0.786774	0.58485	0.399266	0.484429	0.355016	0.393873	0.376963
1100	A	0.251256	0.17589	0.358974	0.171762	0.242915	0.215517	0.262152	0.403877	0.255564	0.348259	0.17375	0.27881	0.344481	0.200685
1113	A	0.0141004	0	0.0166306	0.0531444	0.0164096	0	0	0.0492308	0	0.0259909	0	0.0282805	0.027552	0.0126088
1119	A	0.0685777	0.0269724	0.0627943	0.0696986	0.129955	0.0515996	0.626844	0.82805	1.24596	0.458142	0.367161	0.247021	0.0520969	0.105111
1122	A	0.174191	0.315277	0.11555	0.223505	0.221881	0.265816	0.129668	0.139548	0.172597	0.0583686	0.109649	0.0449978	0.1638	0.121425
1133	A	0.270957	0.281737	0.419173	0.27903	0.347476	0.216724	0.137315	0.199327	0.2106	0.160342	0.20744	0.131234	0.175234	0.0966184
1143	A	0.163319	0.302403	0.174155	0.106701	0.269639	0.164609	0.116847	0.161346	0.164456	0.0619809	0.117111	0.0942951	0.128849	0.0538503
1144	A	0.0490918	0.0796813	0.0871384	0.0855981	0.108225	0.213745	0.0425396	0.0922084	0.0219684	0.0124239	0.0130361	0.0825472	0.0128337	0.053775
1145	A	0.0326851	0.0638264	0.0174429	0.0427625	0.0180375	0.115283	0.0324044	0.0234082	0.0333519	0.0126103	0.0132433	0.0597657	0.0384665	0.0325133
1148	A	0	0.0132873	0.0147842	0.0177778	0.0152161	0.058971	0.0683394	0.0425035	0.132734	0.0801649	0.0968171	0.0772456	0	0.0607718
1149	A	0.0534474	0.0259841	0.028931	0.0174368	0.0149165	0.0145264	0.134966	0.105064	0.171717	0.113417	0.143868	0.164006	0.0335646	0.15086
1150	A	0.131718	0.141008	0.114794	0.154613	0.132567	0.360438	0.153905	0.115171	0.232183	0.10196	0.0838223	0.240621	0.466615	0.190878
1170	A	0.3108	0.350578	0.550721	0.499875	0.560833	0.335454	0.129355	0.14103	0.113755	0.132383	0.0763692	0.0915471	0.282859	0.1217
1173	A	0.0393895	0.0191296	0.0671892	0.0504541	0.0813953	0.0823142	0.297463	0.326202	0.376775	0.206016	0.436583	0.531471	0.04804	0.36225
1181	A	0.101626	0.036493	0.0329417	0.0720548	0.169358	0.1155	0.136953	0.167077	0.097561	0.11139	0.165683	0.112279	0.107046	0.0830641
1182	A	0	0.0365063	0.0439947	0.0360404	0.0791766	0.0925283	0.185934	0.176523	0.249888	0.102545	0.0936232	0.163783	0.0681464	0.10188
1183	A	0.0835267	0.119113	0.0331309	0.0362013	0.136286	0.313589	0.121408	0.114973	0.0895977	0.0560329	0.135403	0.081984	0.243688	0.0834647
1188	A	0.166837	0.146105	0.145822	0.170192	0.124943	0.262843	1.14314	1.00319	1.40672	0.92418	0.928425	1.06785	0.267247	1.00962
1189	A	0.112118	0.119463	0.147042	0.0858159	0.0342975	0.240819	0.983718	1.00213	1.27425	0.796698	0.878156	0.946199	0.159378	0.979144
1190	A	0.0283956	0.0651587	0.0345582	0.0497512	0.0696379	0.0366614	0.0534521	0.117948	0.0718538	0.0806127	0.0347665	0.116401	0.0708502	0.0720906
1194	A	0.0281505	0.0369242	0.0228337	0.0494743	0.0344471	0.0243784	0.088433	0.0975991	0.0817077	0.0602289	0.126991	0.117275	0.0403388	0.0517866
1195	A	0.0186081	0.0275204	0.022668	0.0614855	0.0227583	0.0728774	0.130719	0.04798	0.151561	0.128649	0.0912721	0.0812253	0.0403348	0.173895
1196	A	0.0933445	0.07357	0.0909815	0.0986436	0.0456621	0.462794	0.114649	0.125665	0.163199	0.179928	0.0688863	0.0587337	0.455189	0.186916
1199	A	0.0192808	0.0282859	0.0116604	0.0631951	0.0348797	0.0514271	0.165983	0.0859291	0.169875	0.088164	0.0774293	0.0816882	0.0847368	0.0717618
1200	A	0.079067	0.0193817	0.0479042	0.0909209	0.0238521	0.0526316	0.388485	0.327797	0.484262	0.303098	0.366588	0.289296	0.0540716	0.182282
1204	A	0.0792079	0.165209	0.202598	0.235018	0.202816	0.106298	0.192952	0.145495	0.142687	0.0915018	0.120434	0.0845785	0.219178	0.100781
1208	A	0.299043	0.311709	0.318659	0.501915	0.3744	0.401103	0.874428	0.794895	0.813775	0.595104	0.713637	0.806339	0.436356	0.461894
1209	A	0.606965	0.565357	0.305667	0.449676	0.431487	0.461923	0.48614	0.738804	0.670257	0.49042	0.591949	0.620242	0.363093	0.577964
1214	A	0.70664	0.530796	0.556016	0.638091	0.519511	0.616538	0.551876	0.594228	0.450789	0.473358	0.649442	0.888019	0.487329	0.766831
1217	A	0.131394	0.152275	0.124611	0.20098	0.104026	0.0991736	0.134741	0.0870755	0.115148	0.123503	0.0870575	0.107742	0.132221	0.0661288
1220	A	0.0671592	0.0960538	0.0939408	0.0907132	0.0743287	0.0972573	0.223404	0.164745	0.134655	0.117275	0.0674673	0.142959	0.136302	0.125976
1223	A	0.049338	0.0623004	0.0183705	0.0666297	0.0905387	0.0380445	0.0635391	0.0939408	0.0985586	0.081367	0.147889	0.127569	0.0621559	0.112416
1228	A	0.0157853	0.0149768	0.0269881	0.0638842	0.0261666	0.0656537	0.0108637	0.012038	0.0257235	0.0472255	0.0547945	0.0433965	0.0261324	0.0127763
1240	A	0.0321724	0.0228833	0.0184247	0.0321681	0.0262697	0.0382373	0.0661726	0.0892326	0.187617	0.0418585	0.179974	0.126683	0.0178747	0.143926
1241	A	0.00802826	0.0304832	0.00919879	0.0321302	0.0437598	0.0572137	0.0130787	0.0146628	0.0339386	0.0277085	0.0161734	0	0.0178555	0.0142126
1246	A	0.0742942	0.0628634	0.122862	0.0768724	0.0546647	0.0784006	0.0581818	0.0970246	0.0949127	0.149948	0	0	0.036846	0.0462321
1250	A	0.0248777	0.0157891	0.0569692	0.0220386	0.0367242	0.0198413	0.059952	0.100368	0.1001	0.0154226	0	0.0347162	0.056164	0.0158078
1251	A	0.0500835	0.055635	0.0287081	0.0332189	0.0277546	0.069541	0.0152323	0.0511771	0.102103	0.031211	0.0184094	0.0349223	0.0374953	0.0158881
1253	A	0.116385	0.134835	0.256825	0.187472	0.110998	0.059964	0.120974	0.253036	0.240867	0.201145	0.198915	0.241588	0.103852	0.142248
1258	A	0.117116	0.112432	0.15441	0.0446728	0.0853323	0.0732601	0.0750863	0.185968	0.157947	0.107263	0.154586	0.202908	0.0712831	0.142744
1259	A	0.0837451	0.0241196	0.019333	0.0335758	0.0285063	0.0629459	0.150648	0.118203	0.118577	0.10751	0.119945	0.119027	0.224284	0.175327
1260	A	0.0335937	0.0161251	0.0388614	0.0448984	0.0477874	0.0635526	0.0605144	0.0848896	0.0794281	0.01554	0.224331	0.103093	0.103359	0.0808016
1265	A	0.080457	0.139438	0.141898	0.163416	0.09522	0.190739	0.411413	0.350263	0.470509	0.354755	0.446815	0.637426	0.320706	0.571178
1276	A	0.585162	0.698812	0.570804	0.518425	0.833129	0.97631	0.505457	0.240506	0.324544	0.311139	0.155651	0.284937	0.862616	0.252291
1278	A	0.523195	0.650209	0.474058	0.613027	0.678011	0.800493	0.213771	0.295312	0.117402	0.268456	0.188813	0.291287	0.723667	0.234742
1282	A	0.424046	0.357058	0.459162	0.521767	0.567295	0.834043	0.329272	0.462524	0.337542	0.316753	0.376154	0.430557	0.770237	0.626839
1284	A	0.683829	0.826767	0.587976	0.76012	0.646131	0.566472	0.34433	0.30077	0.275586	0.380409	0.182482	0.595238	0.744907	0.45968
1287	A	0.151328	0.186966	0.179991	0.127714	0.0772798	0.283638	0.241732	0.264709	0.0986558	0.224083	0.112638	0.147783	0.273889	0.261746
1291	A	0.0955338	0.102564	0.0625626	0.062461	0.0657203	0.0915332	0.0534588	0.0234632	0.0479962	0.0343564	0.010929	0.0357995	0.0795439	0.0386947
1293	A	0.0429876	0.121531	0	0.0278979	0.0350836	0.0263019	0.0512348	0.123305	0.0809529	0.0443459	0.115607	0.111321	0.0468823	0.0743679
1295	A	0.0871671	0.0632111	0.00996016	0	0.0207965	0.0691165	0.203004	0.187555	0.194597	0.164763	0.134617	0.0645092	0.0947668	0.0490076
1299	A	0.00849041	0.0398915	0.0176367	0.0110754	0.0544168	0.0814664	0.068346	0.0212404	0.0444741	0.031746	0.04998	0.0208073	0.076746	0.0118511
1301	A	0.0166903	0.0311575	0.0258978	0.0108436	0.0352485	0.109019	0.0785546	0.107021	0.0777691	0.0956328	0.0401043	0.0722991	0.0842854	0.0590807
1313	A	0.022729	0.0213478	0.0237906	0.0393275	0.0470736	0.0722087	0.00969556	0.0632711	0.0217297	0.0207254	0.0195427	0.0298716	0.087558	0.0459982
1332	A	0.210684	0.177002	0.133709	0.227472	0.190775	0.380849	0.441047	0.492763	0.500992	0.494581	0.458672	0.388032	0.402041	0.514851
1344	A	0.0479789	0.00552792	0.0316636	0.0310583	0.0123655	0.0265111	0.0475873	0.0292398	0.0658514	0.0406421	0.041834	0.0355114	0.0679717	0.0123716
1353	A	0.281785	0.299383	0.382328	0.460469	0.34016	0.213561	0.620881	0.750808	0.82033	0.554814	0.768595	0.600929	0.375623	0.40832
1357	A	0.0533369	0.0844493	0.0471635	0.110319	0.0544366	0.0820161	0.284369	0.160872	0.224141	0.192178	0.133281	0.0772798	0.230318	0.116023
1369	A	0.0421078	0.0218675	0.0303527	0.0388954	0.0191693	0.0271758	0.0407797	0.0652795	0.0599925	0.0542103	0.0436332	0.0477593	0.0677382	0.149493
1370	A	0.0418585	0.0380932	0.00603938	0.0463571	0.0190307	0.127912	0.0161825	0.0323651	0.0222932	0.0358359	0.0360855	0.0314886	0.0488251	0.0422253
1376	A	0.011279	0.00518108	0.0288634	0.0292248	0.0120084	0.0322747	0.402154	0.274566	0.387176	0.176197	0.171617	0.130237	0.035203	0.094697
1378	A	0.0227389	0.0157903	0.0235377	0.037048	0.0245821	0.0867071	0.378642	0.509495	0.5766	0.340078	0.5155	0.181351	0.0366636	0.0889944
1379	A	0.0680079	0.0945329	0.0764796	0.103504	0.0551978	0.0533262	0.194024	0.15534	0.168894	0.119464	0.156617	0.113387	0.0488579	0.128624
1382	A	0.087382	0.0974659	0.103457	0.0911369	0.0887368	0.0898473	0.504135	0.455045	0.493347	0.337984	0.413643	0.438799	0.0827077	0.343157
1383	A	0.0649696	0.137597	0.154703	0.115678	0.0645036	0.125725	0.527393	0.415719	0.428217	0.50273	0.501453	0.430207	0.076928	0.321543
1386	A	0.100402	0.123059	0.21295	0.0734694	0.129693	0.0784873	0.180914	0.159393	0.175106	0.140577	0.149594	0.212097	0.18559	0.162955
1388	A	0.202895	0.107895	0.151319	0.0782609	0.0582284	0.119074	0.125205	0.118306	0.167262	0.0603032	0.0968126	0.0973345	0.0983215	0.0832871
1396	A	0.136986	0.182829	0.176589	0.138053	0.0907815	0.11141	0.24957	0.173792	0.28557	0.267994	0.311123	0.341266	0.101087	0.194792
1401	A	0.0153398	0.0148247	0.00850774	0.0593707	0.00832986	0.0479616	0.0942265	0.0686165	0.0674082	0.02849	0.0517152	0.0546797	0.0348038	0.0415024
1402	A	0.0381796	0.0442772	0.0592517	0.0393972	0.0248283	0.0572191	0.0511335	0.0341035	0.041869	0.0283152	0.0256805	0.0540784	0.0520336	0.0205931
1405	A	0.0229218	0.0221174	0	0.0295188	0.0165467	0.0383068	0.0170025	0.0170765	0.0166973	0.0283661	0	0.0088881	0.0349895	0
1409	A	0.0919047	0.036974	0.0341413	0.0495	0.099453	0.0480169	0.0338639	0.0342436	0.0251636	0.0188448	0.0256871	0.0175932	0.0614844	0.0597431
1414	A	0.806304	0.923218	1.08038	0.813502	1.0173	0.501128	0.228724	0.338753	0.296509	0.264438	0.402569	0.275401	0.472514	0.0873839
1421	A	0.222456	0.538084	0.667053	0.545086	0.391134	0.736037	0.248139	0.156022	0.30494	0.296939	0.233645	0.42142	0.873482	0.2443
1438	A	0.438276	0.427925	0.324172	0.295674	0.333498	0.229544	0.256331	0.231249	0.241663	0.118432	0.372564	0.324427	0.234659	0.120469
1439	A	0.0740192	0.0617665	0.0994036	0.125648	0.111885	0.121622	0.143811	0.0603926	0.0484168	0.010777	0.0862069	0.0764453	0.105795	0.0327582
1446	A	0.11243	0.0868056	0.247355	0.0473485	0.0859317	0.0517866	0.169856	0.177128	0.176862	0.104883	0.13287	0.215363	0.0887115	0.0848999
1448	A	0.390422	0.346955	0.268513	0.229245	0.315577	0.178155	0.171096	0.221288	0.228097	0.175111	0.154416	0.0942803	0.114837	0.160851
1452	A	0.297752	0.375235	0.211993	0.278242	0.327332	0.140588	0.161551	0.145251	0.210993	0.0708885	0.165272	0.125694	0.221265	0.124517
1454	A	0.921801	0.842199	0.685036	1.27522	0.94235	0.689752	0.148656	0.0885936	0.15674	0.0469814	0.133142	0.145153	0.568841	0.136358
1455	A	0.0728969	0.0833333	0.0289729	0.0364631	0.092081	0.0394529	0.0325768	0.0525762	0.00990688	0.0335008	0.04879	0.029759	0.0981568	0
1465	A	0.0237982	0.022024	0.0804228	0.0611527	0.0316623	0.0620604	0.0601263	0.0295741	0.12056	0.0312467	0.111431	0.108728	0.117223	0.136162
1469	A	0.0488854	0.117604	0.11672	0.100642	0.0448632	0.13128	0.0566251	0.0651466	0.131903	0.0296326	0.0622444	0.0849217	0.0553054	0.076178
1474	A	0.11469	0.0616197	0.0855432	0.110375	0.10506	0.109937	0.116362	0.0441384	0.167743	0.112994	0.0925536	0.222202	0.0695249	0.0718243
1476	A	0.0677835	0.00890631	0.0577312	0.0497327	0.0530833	0.0342583	0.0811103	0.0710606	0.0509208	0.0284954	0.0169866	0.0357207	0.0631562	0.0624545
1480	A	0.0474473	0.0868131	0.0746408	0.134195	0.0951063	0.0677335	0.151643	0.100075	0.159566	0.162778	0.128908	0.133802	0.0935381	0.139054
1483	A	0.11818	0.116175	0.0576147	0.2286	0.187668	0.0526917	0.575074	0.706776	0.914295	0.482094	0.657376	0.627296	0.0906693	0.502351
1484	A	0.0887311	0.0715756	0.0862647	0.0764818	0.0894534	0.0791348	0.40515	0.372011	0.712569	0.405299	0.413696	0.224095	0.107261	0.202623
1486	A	0.120506	0.0548797	0.0883392	0.0521853	0.0914913	0.0268025	0.271567	0.214554	0.348857	0.241692	0.293751	0.172024	0.0677163	0.299979
1487	A	0.143678	0.0373065	0.0801603	0.0536121	0.140753	0.0828729	0.181785	0.188391	0.193373	0.122775	0.17071	0.156408	0.0960783	0.0985222
1489	A	0.0936817	0.0851466	0.12179	0.122034	0.0473934	0.103559	0.224135	0.247437	0.24165	0.234073	0.167815	0.144928	0.0449559	0.152955
1498	A	0.101363	0.0815744	0.0560475	0.0590493	0.140576	0.101978	0.143403	0.0664767	0.0913576	0.0766367	0.103257	0.0671141	0.092956	0.0470035
1506	A	0.022941	0.0528206	0.0587682	0.0767578	0.14245	0.103702	0.105597	0.0957213	0.120382	0.0879024	0.160414	0.122249	0.18143	0.0932401
1508	A	0.0683216	0.0941521	0.0349487	0.0455443	0.0810948	0.0826532	0.0484543	0.0582637	0.093932	0.0111334	0.0361272	0.0286424	0.138401	0.0237051
1522	A	0.128502	0.121951	0.240224	0.18663	0.180736	0.175112	0.0956429	0.0529045	0.102775	0.0247555	0.036268	0.102202	0.213321	0.0627904
1531	A	0.226831	0.0763942	0.108426	0.166216	0.109529	0.0891379	0.0805246	0.21769	0.120469	0.124533	0.17301	0.0933901	0.0933209	0.112899
1533	A	0.0488679	0.0153163	0.0776759	0.083212	0.0488998	0.0636618	0.0475681	0.0709471	0.0225403	0.0285307	0	0.0106553	0.0800961	0
1537	A	0.109821	0.118238	0.105263	0.16178	0.169041	0.125565	0.396492	0.237586	0.398997	0.244569	0.228243	0.227396	0.168809	0.146951
1545	A	0.0816727	0.156593	0.207204	0.231628	0.172265	0.103533	0.227888	0.212826	0.268637	0.234821	0.189605	0.167526	0.133976	0.24188
1556	A	0.0685518	0.06639	0.033151	0.0224871	0.0129904	0.144509	0.15674	0.106176	0.180981	0.101523	0.117249	0.0320359	0.0549979	0.0431034
1561	A	0.0898473	0.158451	0.120669	0.167745	0.0682501	0.120176	0.345392	0.427748	0.498282	0.148968	0.148308	0.233333	0.0410846	0.197672
1569	A	0.0894294	0.138793	0.0509771	0.118511	0.126671	0.192837	0.0503102	0.0173521	0.0632911	0.0791609	0.057463	0.187906	0.0807646	0.124766
1579	A	0	0.0531538	0.0349284	0	0.0443459	0.0910885	0.0155715	0	0.075643	0	0.0139587	0.0174307	0.0431717	0
1580	A	0.0361141	0.141293	0	0.0956251	0.0719735	0.206186	0.0458716	0.0158554	0.0446296	0	0.0274236	0.0511247	0.114761	0.120192
1588	A	0	0.041511	0.0426803	0.0285144	0.0150512	0.0470736	0.0172384	0.0363372	0.0350447	0.0601082	0.0127307	0	0.0851934	0
1589	A	0.0198216	0.101978	0.0831082	0.0556483	0.0142045	0.0152672	0.100251	0.0174948	0	0.0586166	0.0346781	0.0282127	0.166472	0.0460087
1594	A	1.52076	1.62463	1.52805	1.10241	0.384944	0.255217	0.819952	0.889047	0.683132	0.771361	0.354326	0.243046	0.944829	0.961098
1601	A	0.0626436	0.153779	0.0453515	0.0858124	0.0275103	0.0855676	0.0513699	0.0712631	0.124799	0.0994827	0.0218555	0.0508518	0.0497595	0.0906002
1607	A	0.178015	0.117758	0.072692	0.21078	0.0580636	0.0592944	0.0704597	0.110538	0.146735	0.0820681	0.0329525	0.138452	0.0877501	0.137363
1614	A	0.107112	0.0679964	0.070028	0.0282406	0.0427838	0.0440917	0.0687758	0.142526	0.0880747	0.0403388	0.110364	0.0679502	0.0521286	0.0448129
1619	A	0.0204123	0.0213083	0.0223814	0.0535762	0	0.0140706	0.169808	0.174886	0.208225	0.139498	0.0768861	0.0327118	0.0501421	0.199601
1620	A	0.020404	0	0.0223514	0.0800213	0	0.0421112	0.238704	0.228431	0.27933	0.180325	0.0385023	0.0545197	0	0.290308
1623	A	0.0200401	0.0625652	0.0217486	0.104603	0.0133869	0.0133387	0	0.018005	0.018031	0	0.00959877	0.010898	0.0327815	0
1630	A	0.944305	0.906344	0.913145	0.461894	0.243843	0.0828697	1.79995	1.32922	1.57271	1.4377	0.881727	0.687837	0.404669	0.732708
1633	A	0.020028	0.0420521	0	0.026688	0.0246275	0.0691483	0.0735474	0.0254582	0.0793441	0.143102	0.053011	0.0710311	0.0622374	0.2118
1634	A	0.0190042	0.0589507	0.0205677	0.0756048	0.11422	0.093332	0.333572	0.421836	0.207415	0.138313	0.226477	0.146942	0.0421467	0.351597
1637	A	0.195451	0.380987	0.459067	0.095057	0.0745712	0.056338	0.825877	1.21284	1.11364	0.745871	0.155794	0.182933	0.537564	0.550087
1640	A	0.0326318	0	0.0339041	0.109242	0.0906984	0.149282	0.284164	0.214823	0.369844	0.263158	0.0896772	0.273224	0.0905446	0.4
1641	A	0.0304507	0.0450721	0.0470367	0	0.0472858	0.0899766	0	0	0.112233	0	0.0686476	0.151614	0.0125329	0
1647	A	0.0374345	0.107965	0.0246822	0.0171057	0.177893	0.0881693	0.505051	0.651381	0.518701	0.313123	0.700104	0.503808	0.0460405	0.413793
1650	A	0	0.0122654	0	0	0.00859623	0.0249025	0	0.0277085	0.0573723	0.0600601	0.10666	0.0521241	0.0357015	0
1651	A	0.0127992	0.0245188	0.0755858	0	0.0171807	0.0331785	0	0.0554017	0.0285225	0.0597193	0.0236546	0.0130073	0.0356633	0.0356379
1661	A	0.0800213	0	0	0.0930579	0.0364033	0.043987	0.045683	0.16044	0.0447828	0.107325	0.205364	0.185553	0.0762583	0.0594707
1663	A	0.0267559	0.0127779	0	0.0187231	0	0.00882379	0.0453721	0.045527	0.0888099	0.0268312	0.0243665	0.0134445	0.0509424	0
1664	A	0.0133761	0.0383289	0.0262536	0	0.0182632	0.0705779	0	0.0452489	0.0220897	0.0267237	0.0121477	0.040016	0.076365	0
1675	A	0.0137043	0	0	0	0.0377608	0.0628536	0.0570559	0	0.0178508	0.0467181	0.0763553	0.0397193	0.0652231	0
1678	A	0.0670781	0	0	0	0.0186376	0	0	0	0.0174948	0.0687758	0.0373739	0.0128337	0	0
1679	A	0.0527704	0.101266	0.119824	0.0552792	0.119871	0.0624387	0.0183655	0.0543085	0.0347584	0	0.0246548	0.0127146	0.0639386	0.0206825
1695	A	0.0898634	0.156522	0.170746	0.0766675	0.217362	0.167683	0.171644	0.0493097	0.0458856	0.090151	0.0981492	0.0573723	0.112511	0.0387747
1697	A	0.157325	0.113938	0.165597	0.13885	0.244275	0.127877	0.107778	0.0853097	0.0157654	0.0943841	0.11976	0.0303536	0.0523423	0.0198413
1699	A	0.778715	0.897891	1.20846	1.18577	1.38576	1.48728	0.197984	0.238055	0.25	0.402272	0.40404	0.201926	1.45805	0.0974279
1712	A	0.066357	0.13986	0.196657	0.249792	0.214133	0.139082	0.0172384	0.0163452	0.059961	0.0689022	0.035292	0.0852224	0.508762	0.0350385
1715	A	0.134318	0.206897	0.394477	0.330579	0.357398	0.140845	0.0552079	0.034825	0.0323415	0.0479616	0.126354	0	0.167224	0.0182949
1719	A	0.258565	0.200401	0.383509	0.160256	0.278358	0.139567	0.0730861	0.0694083	0.129912	0.04662	0.17618	0.243902	0.161987	0.0732467
1724	A	0.301205	0.250941	0.423729	0.380228	0.197109	0.207039	0.0183284	0.0525762	0.082481	0.022748	0.0530786	0.0545852	0.365344	0.0191718
1731	A	0.0539374	0.0568505	0.361272	0.545703	0.0575705	0.131752	0.0893256	0.240437	0.275074	0.416667	0.0205255	0.065331	0.0961076	0
1735	A	0.501756	0.905218	0.686642	0.384369	0.896624	0.696864	0.206659	0.134048	0.216591	0.0792602	0.403826	0.397661	0.475737	0.0745527
1745	A	0.305966	0.109769	0.162866	0	0.104112	0.117994	0.114778	0.0283688	0.137476	0.0310655	0.168492	0.270362	0.461023	0.0298597
1768	A	0	0	0	0	0.0523013	0	0	0	0.0240269	0	0.0247893	0	0.0428449	0.0235018
1781	A	0	0.0488759	0	0	0.0437063	0.0989609	0	0.0143102	0.0132802	0.0394166	0	0.0149365	0	0.0302435
1788	A	0	0	0	0.0629327	0	0	0.0140548	0.0132503	0.0123077	0	0	0	0	0
1790	A	0.183908	0	0.0470146	0	0	0	0	0	0	0.0178348	0.013637	0	0.0365898	0
1791	A	0	0	0	0.0626174	0	0	0	0.0131182	0	0.017819	0	0	0	0.0287398
1793	A	0	0	0	0.188679	0	0.0490196	0.0833681	0	0.0488998	0	0.0136388	0	0.110335	0
1800	A	0	0	0	0	0	0	0.0137836	0	0	0	0	0	0	0.0143266
1801	A	0.0464684	0	0.0481	0	0	0.0505561	0	0.0129887	0	0.0176803	0	0	0	0
1806	A	0	0	0.0951475	0.0635728	0.0440723	0.1002	0.0136818	0.0258665	0	0.0176491	0	0	0	0
1809	A	0	0	0	0	0.0435161	0.0498504	0	0	0.0121286	0.0177211	0	0	0.03663	0
1813	A	0.0921659	0	0	0	0	0	0.0137627	0	0.0243339	0	0.0137571	0	0.0364564	0.0142045
1815	A	0	0	0	0	0	0.0501253	0	0.0265851	0.024854	0	0	0.0280073	0.0368596	0.0144009
1818	A	0	0.100654	0.0969932	0	0	0.0517331	0.014374	0	0.0254842	0.0187899	0.0435983	0.0141904	0.0755002	0.01459
1819	A	0.0485909	0.15121	0	0	0.134892	0	0.0862937	0.0275065	0.0510009	0.0564016	0.0436237	0.0283849	0	0.02918
1822	A	0	0	0.0503778	0.0700771	0	0	0.0293384	0	0	0.0192234	0	0	0	0.0148412
1823	A	0.0513875	0.0531067	0.0504286	0	0	0.0536769	0.0146994	0	0	0	0	0	0.0780336	0
1824	A	0	0	0	0	0	0.107411	0.0147493	0.0141864	0	0.0581734	0	0	0.0782167	0.0298641
1825	A	0.15536	0.107585	0.101729	0.141643	0.140779	0.108578	0.166641	0.145201	0.296456	0.09996	0.0620829	0.088587	0.157978	0.0461894
1831	A	1.77305	1.78971	2.27273	1.04862	1.07391	1.51261	6.02025	6.75393	5.74463	5.10025	6.56371	6.7712	1.6372	4.5745
1832	A	3.17848	3.56537	4.42986	4.74183	4.37544	3.06122	2.12111	2.08403	2.63158	2.29358	2.06349	1.70586	2.8777	1.26376
1834	A	0.277778	0.194175	0.381316	0.604595	0.328947	0.414508	0.54902	0.618956	0.975081	0.681699	0.728266	1.59959	0.396197	0.506679
1835	A	0.191571	0.0998004	0.588813	0.745342	0.341297	0.527426	0.395257	0.390625	0.255661	0.158479	0.50598	0.314136	0.721732	0.0931966
1845	A	1.34228	0	0.552486	0	0.892857	0.724638	2.85171	3.28542	6.25	6.0274	7.64331	9.48276	0.497512	3.02198
1850	A	7.04225	3.27869	3.84615	2.77778	1.73913	3.33333	4.74308	7.5	5.30035	4.48718	6.84932	6.25	1.42857	1.6129
1851	A	2.98507	1.69492	0	2.85714	0.884956	0	2.51046	2.76498	4.47761	2.73973	3.07692	4.91803	0.735294	1.65975
1859	A	0	0	0	0	0	0	0	0	0	0	0	0	0	0
1860	A	0	0	0	0	0	0	0	1.11111	4.44444	4.54545	0	0	0	0
1863	A	0	0	0	0	0	0	0	2.04082	0	0	0	0	0	0
1866	A	3.57143	0	0	0	0	0	16.6667	9.375	12.9032	17.3913	0	4.34783	1.49254	15.7895
1869	A	0	0	3.57143	0	0	3.7037	57.1429	42.8571	62.5	0	22.2222	20	3.84615	9.09091

## Sheet: A>T
18s location	forward strand reference base	WT NaBH4 2-NH2-d-ATP HIV	75% WT NaBH4 2-NH2-d-ATP HIV	50% WT NaBH4 2-NH2-d-ATP HIV	25% WT NaBH4 2-NH2-d-ATP HIV	WT untreated 2-NH2-d-ATP HIV	WT untreated dNTPs HIV	WT NaBH4 d2-NH2-d-ATP SSIV	75% WT NaBH4 dNH2-ATP SSIV	50% WT NaBH4 2-NH2-d-ATP SSIV	25% WT NaBH4 2-NH2-d-ATP SSIV	WT untreated 2-NH2-d-ATP SSIV	WT untreated dNTPs SSIV	WT NaBH4 dNTPs HIV	WT NaBH4 dNTPs SSIV
2	A	6.66667	0	3.44828	3.84615	5	0	25	14.2857	25	0	0	14.2857	0	25
11	A	0.337838	0.271739	0	0.381679	0	0.584795	1.37931	0	0	0	0	0	0.3367	0
19	A	0.074239	0.220588	0.371747	0.422833	0.0660939	0	0.0498504	0.0642777	0.051742	0.0187512	0.0328515	0.0276167	0.126103	0.0296121
22	A	0	0.1875	0	0	0	0	0.0744269	0.0433714	0.121895	0.0489796	0.058651	0.10142	0.100301	0
25	A	0.169972	0.117165	0.0611621	0	0	0	0.180405	0.107889	0.155918	0.0756659	0.0550812	0.313199	0.0841751	0.163056
27	A	0.557103	0.403691	0.603865	0.24855	0.32345	0.821018	0.0948381	0.145157	0.111173	0.118308	0.0674127	0	0.892857	0.225378
38	A	0.0739098	0.123762	0.0913242	0.058309	0.0394633	0	0.0536049	0.0173025	0.0191278	0.0769231	0.0176991	0.0217533	0	0.011217
39	A	0.110701	0.0823723	0.182482	0.0581734	0.0394322	0	0.044619	0.0432077	0.0573175	0.0384098	0.0176772	0	0.0461894	0.0336247
40	A	0.110457	0.0410509	0	0.115808	0	0	0.0267023	0.0258732	0.066762	0.0287577	0.00881679	0	0.0922935	0.0111907
42	A	0.0359712	0.0803213	0.0893655	0.169875	0	0	0.0426367	0.0414113	0.0367444	0.0550408	0.0169377	0.0205846	0	0.0212653
45	A	0.106345	0	0.0441891	0	0	0.0473709	0.0412473	0.0322477	0.11602	0.0621283	0.0413633	0.0911023	0	0.0417362
46	A	0	0.118483	0.0883783	0.0554631	0	0	0.0493583	0.0321776	0.0534378	0.0265416	0	0.0202122	0	0.0624675
50	A	0.104239	0.152672	0.0436491	0.160858	0	0	0.0697945	0.0536769	0.0168776	0.050025	0.00786473	0.0286834	0.0862069	0.0785315
54	A	0.0669568	0.110947	0.170867	0.156006	0.0723589	0	0.0821141	0.0518442	0.0485948	0.0720403	0	0	0	0.0373902
60	A	0.0313775	0.0693722	0.0407498	0.0976086	0.0345662	0.0424088	0.0353832	0.00704275	0.00769941	0	0	0	0	0
61	A	0.157233	0.104131	0.0815328	0.0488998	0	0	0.0353782	0.0140815	0.0461681	0.0449876	0.00719942	0	0.117601	0.00883626
64	A	0.0959693	0.107296	0.0857633	0.100604	0	0	0.00704325	0.0490196	0.0460865	0.0373134	0.0287315	0	0.0403063	0.0263736
68	A	0.409965	0.318584	0.731183	0.438383	0.545653	0.208943	0.0346212	0.0275084	0.0605189	0.0877835	0.0211655	0.0250731	0.314218	0.0259045
77	A	0.198244	0.347113	0.233736	0.400641	0.197368	0.379441	0.0765477	0.0291177	0.0941127	0.0475421	0.00968148	0.0206398	0.158028	0.052367
79	A	0.145054	0.129534	0.0399202	0.163666	0.0682594	0	0.0705432	0.0510256	0.011121	0.0399281	0.030722	0	0.0625586	0.0319557
83	A	0.154123	0	0.182615	0.0730194	0.0906892	0.0607349	0.0611122	0.0924214	0.0793471	0.0804586	0.0407249	0.109879	0.115241	0.0833768
84	A	0.0515464	0.0569801	0.0366166	0.146574	0	0.0305717	0.0413993	0.0208812	0.0230654	0.0204374	0.010322	0	0.116618	0.0210859
85	A	0.0775996	0.0573559	0.110051	0.0733138	0	0	0.052532	0.0529325	0.0585069	0.0517117	0.0208681	0.0103702	0.0596481	0.0324149
91	A	0.190074	0.0226809	0.0903342	0.0896861	0.0974896	0.0276855	0.0233019	0.0348149	0.0504159	0.0332668	0	0	0.0828043	0.0239406
92	A	0.021004	0.0451671	0.0899281	0.118765	0.0484379	0.027571	0.0582886	0.0348513	0.0126103	0.0777087	0	0	0	0.0359497
99	A	2.41305	2.58196	2.17638	2.26223	2.77423	2.15164	0.214909	0.164722	0.0700182	0.210787	0.180645	0.384615	2.55319	0.419539
102	A	0.228833	0.16581	0.0888297	0.226398	0.0528448	0	0.11247	0.057496	0.0724743	0.0770317	0.0802783	0	0.154839	0.0775555
103	A	0.0815661	0.0329761	0.0443262	0.0678887	0	0.0243309	0.0285714	0.0290276	0.0292312	0.0517331	0	0	0	0.0154607
104	A	0.0635425	0.128226	0.128755	0.131781	0.0338295	0.166231	0.0280544	0.0709421	0.0574878	0.0506521	0.0393494	0	0.0992802	0.0301796
107	A	0.105216	0.0460688	0.0407	0.0414766	0	0.0219298	0.0111882	0.0225759	0.0241692	0.0210859	0.0317528	0	0.0460723	0.0257732
111	A	0.172191	0.102026	0.0771754	0.119	0.0302755	0.0209556	0.0326691	0.0437158	0.0475568	0.0205973	0	0.0268745	0	0.0787608
141	A	0.136324	0.0879507	0.0481078	0.170648	0.0372532	0	0.0875657	0.0640666	0.0554939	0.0887526	0.0156433	0.0228964	0.0391313	0.0427533
147	A	0.0923239	0.0668628	0.0673968	0	0.0529942	0	0.0638723	0.064914	0.0563539	0.0327923	0.0399553	0	0.041606	0.0673023
149	A	0.0954329	0.111034	0.0347766	0.074599	0.110132	0.0218723	0.0241916	0.0574618	0.0285878	0.0082905	0.0161447	0	0.0213447	0.0228311
150	A	0.082012	0.069667	0.0174125	0.130915	0.0968188	0.043985	0.0403942	0.0411184	0.0477281	0.0332226	0	0.0614628	0.0642398	0.0229568
158	A	0.0438404	0.0606244	0.0737463	0.100929	0.0296077	0.0668747	0.190265	0.122279	0.140924	0.135973	0.153859	0.0482276	0.0665779	0.0344907
159	A	0.84085	0.720807	0.636574	0.829258	0.71875	0.44843	0.528761	0.452489	0.351244	0.507221	0.523646	0.66388	0.373744	0.677016
164	A	0.131849	0.137847	0.0741015	0.225548	0.104509	0.0231107	0.263852	0.310411	0.319139	0.247103	0.357313	0.0446977	0.0481812	0.143599
166	A	1.40905	1.10933	1.14943	1.26883	1.06914	0.542273	0.167077	0.124246	0.0796099	0.13616	0.0883783	0.0244141	0.317125	0.0380276
170	A	0.0969932	0.126957	0.0351679	0.0579934	0.0270709	0.0486145	0.222779	0.224467	0.154783	0.12398	0.130366	0.036346	0.0524384	0.0629485
171	A	0.126103	0.0713369	0.0355177	0.039032	0.054802	0.0245942	0.113917	0.0382738	0.0104998	0.042337	0.0855188	0.0734214	0.0798509	0.063589
173	A	0.0417014	0.0428816	0.0359454	0.0778059	0.0414079	0.0496032	0.0472367	0.0858943	0.0103875	0.0422878	0.0759878	0.0121921	0	0.0378597
175	A	0.0414766	0.0142918	0.0543971	0.0191828	0.0139899	0.0248077	0.0834028	0.0656476	0.0203874	0.0936622	0.056301	0.0474947	0	0.0367422
181	A	0.215818	0.304112	0.451546	0.309864	0.173774	0.293653	0.335393	0.36325	0.25203	0.221707	0.220809	0.0975716	0.587947	0.171979
191	A	0.164523	0.136343	0.15653	0.111649	0.134148	0.118624	0.0320342	0.0431267	0.0203355	0.0246275	0.0104504	0.0113199	0.272817	0.0251762
209	A	0.0349162	0.0223065	0.0270234	0.0718597	0.0533276	0.062588	0.0726141	0.0309661	0.0368189	0.132053	0.0390054	0.0204729	0.0937835	0.0476758
217	A	0.0644884	0.0513611	0.0730905	0.209809	0.130969	0.0738116	0.132464	0.189734	0.0601116	0.18731	0.0186951	0.0708144	0.118666	0.288184
221	A	0.105831	0.0712468	0.095511	0.154599	0.0703588	0.0287894	0.0514562	0.0706999	0.0342759	0.0354736	0.0283152	0.0307	0.0883392	0.0602773
224	A	0.219679	0.145479	0.244153	0.152566	0.0226296	0.0153563	0.0222	0.0658545	0.119277	0.140235	0.0308674	0.0348797	0.147225	0.0671501
226	A	0.0722282	0.105374	0.106553	0.129964	0.0360187	0	0.0574977	0.0343249	0.0478377	0.0799574	0.0766116	0.0233481	0.108448	0.0260722
229	A	0.105621	0.103046	0.0130839	0.141363	0.03529	0.0732172	0.0440723	0.0662471	0.00930146	0.012773	0.0319047	0.0671441	0.127782	0.0370325
230	A	0.0704804	0.0800549	0.091659	0.0988421	0.0470865	0.0293212	0.0659631	0.0330542	0.0278759	0.0509359	0.0318167	0.0111982	0.0212585	0
231	A	0.070373	0.0228258	0.0523355	0.126778	0.0234714	0.0146413	0.0546269	0.0547525	0.0832717	0.0253453	0.0421896	0.0111359	0.0423864	0.0244918
232	A	0.141127	0.0458085	0.0917431	0.225957	0.0704887	0.0146908	0.0873839	0.0656743	0.0648088	0.0761711	0.0422253	0.0445236	0.0424178	0.0244618
235	A	0.0489596	0.0825374	0.0398989	0.0293255	0.0119875	0.0152253	0.252323	0.137599	0.192604	0.0811908	0.132261	0.142231	0.0545971	0.106966
236	A	0.0737191	0.0945403	0.0266631	0.0884956	0.0601034	0.0611995	0.0690608	0.0461521	0.16441	0.067861	0.0774422	0.0714031	0.0764276	0.134228
244	A	0.0459207	0.143102	0.0288642	0.130548	0.0138581	0.0697593	0.150417	0.147512	0.15559	0.144485	0.100553	0.135906	0.184014	0.0755744
292	A	0.111843	0.0613723	0.0773754	0.064288	0.0227015	0.0148346	0.0646412	0.0738163	0.00948857	0.0603719	0	0	0.0651466	0.0376176
297	A	0.187676	0.122399	0.104946	0.161334	0.0558867	0.0649942	0.0634518	0.0446349	0.0653328	0.0627615	0.0678541	0.0300661	0.0573592	0.0779336
299	A	0.0660066	0.074481	0.0480192	0.0852411	0.0590269	0.0117371	0.0800569	0.0351247	0.0728096	0.0727575	0.0587298	0.0485343	0.063647	0.0440286
301	A	0.084507	0.0555916	0.10772	0.0730905	0.0503905	0.03544	0.0895736	0.0354327	0.0243942	0.020982	0.0508087	0.0299341	0.0427991	0.067766
302	A	0.0562957	0.101871	0.107643	0.0730282	0.0251847	0.0472478	0.035743	0.0442087	0.0324123	0.0209402	0.016889	0.0398923	0.032065	0.0112892
313	A	0.0578536	0.0843249	0.0241225	0.0986193	0.0255907	0.0250438	0.0559284	0.083682	0.0913925	0.054939	0.0270295	0.0110424	0.168294	0.0367107
318	A	0.0821543	0.0880127	0.102482	0.0925605	0.0163666	0.0234769	0.11531	0.122872	0.103487	0.104482	0.0431704	0.0731452	0.0521757	0.0695572
336	A	0.0294291	0.0281849	0.035137	0.0482276	0.0256366	0.0121862	0.0259291	0.0344175	0.0232721	0.0305655	0.0170126	0.010247	0.0512663	0.0338295
339	A	0.099681	0.0190277	0.130332	0.0367557	0.0607007	0.0373692	0.00874355	0.0348857	0.0078703	0.0205086	0.0258688	0.0104778	0.062847	0
343	A	0.0295043	0.0470234	0.0346821	0.0484614	0.0428816	0.0493218	0.016794	0.0418971	0.0529942	0.039514	0.00830427	0.0304075	0.0521866	0.0546986
348	A	0.104068	0.109479	0.0783348	0.093611	0.0597117	0.0373739	0.0239234	0.0398153	0.0359686	0.0561272	0.023872	0.00963855	0.0209534	0.0307503
349	A	0.0856246	0.0917263	0.101386	0.10607	0.0772665	0.0374392	0.0321234	0.0881764	0.0941211	0.0752516	0.0560179	0.0289464	0.0526593	0.123203
360	A	0.0287687	0.0852636	0	0.105634	0.0758956	0.0441209	0.10591	0.0951676	0.0456621	0.0606649	0.0316924	0.0526524	0.0329164	0.0386997
363	A	0.0429492	0.0423669	0.0340948	0.0523469	0	0.0217817	0	0.0698324	0.00868885	0.046067	0.0100351	0	0.0806712	0.109596
364	A	0.0319336	0.0621504	0.0740878	0.0767018	0	0.0227894	0.042603	0.0418104	0	0.0121315	0	0	0.0688231	0.0883058
371	A	0.0382555	0.0560433	0.021815	0.0697674	0.0406504	0	0.0707631	0.0696217	0.0815245	0.013224	0.02361	0.0140469	0.139414	0.0820232
376	A	0.0622407	0.0410341	0.0478011	0.0250564	0.0211193	0	0.0352983	0.0347062	0.0305002	0.0523697	0	0.0284535	0	0.0273224
389	A	0.0754337	0.133833	0.0648298	0.0622278	0.0295334	0.0391543	0.02552	0.0254259	0.0115367	0	0.0257832	0	0	0.0146156
392	A	0.126775	0.0268168	0.0326264	0.0627746	0.0295858	0	0.0910273	0.0519481	0.0469814	0.0998716	0.0392722	0.0318878	0.0505306	0.10326
398	A	0.121566	0.0506073	0	0.060006	0.0554631	0.108814	0.0621041	0.111111	0.0665115	0.0275558	0.0379027	0.0150038	0.143988	0.0144844
401	A	0.0504286	0.184599	0.187676	0.0938086	0.17301	0.152555	0.142045	0.0770218	0.103962	0.0710631	0.0919118	0.0928793	0.025355	0.132685
408	A	0.111826	0.141363	0.10395	0	0.0298864	0.0385951	0.168256	0.263889	0.241761	0.211066	0.172117	0.236367	0.214477	0.114155
414	A	0.130406	0.174825	0.0269324	0.0824629	0.0684151	0.0821693	0.0127421	0.125849	0.0722979	0.135135	0.0405351	0.0613497	0.0404858	0.0284212
415	A	0.140309	0.0997009	0.0246975	0.102328	0.0839454	0.125691	0.0745898	0.0858896	0.0355956	0.0397878	0.013224	0	0.0183486	0.0973304
418	A	0.0460688	0.0452148	0.0374532	0.139303	0.0325203	0.0395804	0.123277	0.0890175	0.0760787	0.133755	0.146288	0.164226	0.0754717	0.167332
426	A	0.114226	0.0910378	0.0622898	0.0957854	0.0110096	0.0139179	0.155634	0.0629789	0.0837083	0.113572	0	0.082203	0.0810279	0.126646
433	A	0.0880023	0.141871	0.136457	0.115592	0.0835422	0.119458	0.123993	0.209358	0.188482	0.181963	0.231707	0.0413052	0.111049	0.0759782
435	A	0.0697767	0.0671334	0.0115141	0.0526385	0.02145	0.0135117	0.0964527	0.087222	0.130222	0.152815	0.0512492	0.071398	0.056773	0.104371
439	A	0.070042	0.0574603	0.0458663	0.0659892	0.0428311	0	0.0945776	0.139037	0.150505	0.0462856	0.0643418	0.0434972	0.0915122	0.078937
445	A	0.0581283	0.0185134	0.0662179	0.0256937	0	0.0391083	0.0480077	0.0585652	0.129844	0.063012	0.0240414	0.0541712	0.0331528	0.0122324
447	A	0.0563539	0.0445434	0.0633714	0.0742758	0.0100796	0.0125047	0.00917684	0.065901	0.0194742	0.0303921	0	0	0.0319523	0.0117509
448	A	0.0652377	0.0531114	0.0420521	0.0738643	0.0200541	0.0124533	0.0817439	0.102727	0.0871249	0.0704509	0.0115247	0.0258031	0.042508	0.0349487
449	A	0.0371506	0.0441423	0.104932	0.0489956	0.009995	0.0373227	0.0725558	0.0652498	0.0483138	0.0501958	0.0459982	0.0387347	0.0424899	0.0465333
455	A	0.0741771	0.0709723	0.0428036	0.0367377	0.010102	0	0.0903424	0.0471254	0.0196329	0.0398525	0.0115835	0.0258699	0.0643708	0.0114508
458	A	0.0369686	0	0.0321234	0.0366883	0	0.0125094	0.0260123	0.0182498	0.0570939	0.0480492	0.022424	0.0378788	0.0213015	0.0443066
460	A	0.0277187	0.0355366	0.0106929	0.0244559	0	0	0.0512733	0.0450653	0.0188875	0.0569638	0.0221926	0.0249626	0.0318844	0.0109999
464	A	0.0276727	0.0443459	0.0106998	0.0733138	0.01001	0.0249128	0.0573676	0.0432638	0.073066	0.0457331	0.0424313	0.0484379	0.0423908	0.0212224
465	A	0.0647668	0.0711111	0.0429507	0.0981234	0.0401365	0.0494805	0.0410172	0.0865052	0.0639912	0.0365698	0.0424178	0.0601757	0.063358	0.0842371
468	A	0.409875	0.451946	0.355122	0.379987	0.28225	0.204892	0.635983	0.735816	0.743424	0.671014	0.46974	0.419598	0.377652	0.50954
469	A	0.105932	0.0650618	0.0335909	0.0254388	0.0527259	0.0773794	0.093625	0.072372	0.145659	0.0862647	0.133794	0.112472	0.0335833	0.0879121
473	A	0.137595	0.172922	0.121981	0.194363	0.186328	0.15896	0.144027	0.15441	0.104286	0.110932	0.23892	0.246002	0.291139	0.240848
476	A	0.165691	0.223001	0.360314	0.300343	0.198931	0.25	0.349431	0.318164	0.394928	0.269703	0.368171	0.355385	0.219599	0.302994
484	A	1.4635	1.85732	1.55763	1.41813	1.74195	1.37181	0.3158	0.138844	0.245755	0.204191	0.204499	0.22007	1.2828	0.194881
485	A	0.0541614	0.0702371	0	0.112133	0	0	0.0692795	0.139097	0.112082	0.183565	0.0384714	0.073616	0.0393159	0.0907206
486	A	0.0544761	0.106176	0.233199	0.135563	0.0625391	0.0973947	0.0198728	0.0536999	0.0677048	0.0652316	0	0.0147449	0.0396904	0.0520359
489	A	0.164624	0.125583	0.323694	0.0910125	0.169815	0.125534	0.049087	0.0634182	0.0665188	0.0647878	0.114112	0.102175	0.122474	0.0515996
493	A	0.205255	0.123153	0.258131	0.154044	0.172968	0.29201	0.0490148	0.0736377	0.0665779	0.118675	0.0372024	0.0700574	0.195567	0.0250125
500	A	0.093985	0.155521	0.0499625	0.282154	0	0.167705	0.0578536	0.08329	0.0640615	0.0948667	0.0116632	0.0516863	0.116595	0.0463499
508	A	0.0679232	0.126445	0.113792	0.147275	0.138067	0.187656	0.0842618	0.132087	0.0400481	0.0921942	0.0558036	0.0252685	0.235553	0.0919857
512	A	0.502165	0.439078	0.703906	0.491663	0.399521	0.32915	0.438179	0.400575	0.349406	0.457952	0.303712	0.203511	0.425726	0.231884
516	A	0.0496689	0.0348311	0.020938	0.0612245	0.0564759	0	0.120603	0.0962258	0.155796	0.141074	0.0698487	0.0403932	0	0.0873145
519	A	0.0367827	0.048846	0	0.0297929	0.0389358	0.0161031	0.0777756	0.101947	0.114932	0.0926116	0.0873935	0.0797342	0.0237982	0.0862388
520	A	0.0364431	0.109157	0	0.0442282	0.0385852	0.015868	0.147391	0.195333	0.250844	0.145319	0.16518	0.106938	0.0470533	0.123824
521	A	0.0602627	0.0601106	0.0681106	0.0731315	0	0.0311042	0.0594236	0.0520075	0.038975	0.0314928	0.0667037	0.107541	0.0232477	0.0624766
522	A	0.0361185	0.0240674	0.013587	0	0.0381631	0	0.0802327	0.0316156	0.0392503	0.0847099	0.0225479	0.0135556	0.0115915	0.012596
523	A	0.0838022	0.107514	0.107672	0.116397	0.0882724	0.231696	0.0200884	0.0528541	0.00982898	0.116637	0	0.0134844	0.276561	0.0125031
525	A	0.0455581	0.0679425	0.0757098	0.0972222	0.0239292	0.0146735	0.030024	0.0421941	0.0490918	0.0527983	0.0113263	0.0135556	0.0332116	0
526	A	0.0453566	0.0224542	0.0623675	0	0.0118708	0.0146735	0.050221	0.0636605	0.0197239	0.0424358	0.0456152	0	0.0220848	0.0254842
528	A	0.0448129	0.0441014	0.0244708	0.0136147	0.0465658	0.0146994	0.0601745	0.0424989	0.019757	0.0426076	0.022865	0.0137457	0.0333482	0.02575
529	A	0.0446379	0.0329128	0.060687	0.0408552	0	0.0143823	0.0693481	0.0209842	0.00973805	0.0632045	0.0112931	0.0135373	0.0326371	0.0381049
531	A	0.0220994	0.0976457	0.0479157	0.0270416	0	0.014247	0.109203	0.0736532	0.0876083	0.0529437	0	0	0.0215285	0.101742
533	A	0.0509424	0.0693619	0.0650971	0.0867195	0	0	0.0682594	0.0725765	0.0770564	0.0621118	0.0769908	0.0402253	0.0527148	0.0504286
536	A	0.0856348	0.0934774	0.0332853	0.0526454	0.0106701	0.0143988	0.0716259	0.141197	0.0399082	0.0322824	0	0.0422952	0.0770925	0.0132573
545	A	0.0632045	0.183374	0.33747	0.623863	0.0636267	0.0719528	0.0622407	0.192047	0.205361	0.587851	0.0593261	0.0874253	0.0976457	0.0403117
554	A	0.0210283	0.0400802	0.0317326	0.0516529	0.0104428	0	0	0.0524329	0.0503474	0.0308103	0.0111086	0	0.0425713	0.0392465
555	A	0.125497	0.069965	0.0422699	0.0516529	0.0415973	0.0563857	0.0772723	0.0622536	0.0698603	0.0712396	0	0.0137043	0.010553	0.0636862
560	A	0.0906436	0.0479157	0.0810291	0.0622432	0.010013	0.0137212	0.0642615	0.0798164	0.0583828	0.0577534	0	0.0132591	0.0307377	0.0366032
561	A	0.0302358	0.0384025	0.0304909	0.0374438	0.0100715	0.0275179	0.118917	0.039655	0.0485578	0.0671592	0.0417667	0.0264201	0.0102449	0.0606208
564	A	0.0526427	0.100533	0.0426485	0.0652656	0.0105943	0.0150083	0.0794755	0.0762278	0.150134	0.0615448	0.0339635	0.014455	0.0113289	0.0130582
569	A	0.0399481	0.0192641	0.020938	0.0122579	0.0101729	0	0.0973899	0.0970455	0.0550116	0.0894721	0.0444543	0.0143451	0.06584	0.012987
574	A	0.129883	0.0965624	0.0741997	0.10993	0	0.028931	0.0680603	0.0760622	0.0899888	0.0790983	0.0111222	0.0140746	0.0559284	0.0637755
575	A	0.010015	0.0387072	0.0320444	0.0122175	0.010202	0	0.0765184	0.0428862	0.0331675	0.00975324	0.0219756	0.0279057	0	0.0126167
576	A	1.02	1.20204	1.10993	1.06874	0.946565	0.676064	0.410275	0.425953	0.707357	0.467761	0.448888	0.526113	0.774165	0.622694
583	A	0.192308	0.0800091	0.07769	0.196409	0.0620424	0	0.0456329	0.0613874	0.0531067	0.0282194	0.0637484	0.013113	0.0526593	0.0237332
584	A	0.105485	0.0592557	0.0404422	0.0870448	0.0387297	0.0366838	0.0556793	0.0624285	0.107365	0.0572191	0.032345	0	0.0822707	0.0722892
587	A	0.177704	0.121007	0.110451	0.190086	0.0395257	0	0.0178126	0.0496376	0.0309151	0.0272826	0.030722	0	0.137969	0.0332152
590	A	0.387409	0.420584	0.38287	0.488961	0.321845	0.231392	0.402937	0.29973	0.280636	0.31273	0.289466	0.452219	0.298805	0.42354
594	A	0.0962199	0.071398	0.0165207	0.0506329	0.0471846	0.0622278	0.0279382	0.0728635	0.0430663	0.124331	0	0.0244021	0.194175	0.0687916
599	A	0.224656	0.145815	0.151592	0.171969	0.127085	0.0201005	0.243104	0.35424	0.29661	0.329841	0.270066	0.0970285	0.0573888	0.206091
604	A	0.0686248	0.0407886	0.0777122	0.0495458	0.0849017	0.0359648	0.11324	0.103488	0.0712468	0.0781632	0.0754229	0.083712	0.108152	0.0918379
605	A	0.054742	0.0809717	0.077101	0.115151	0.0280034	0	0.0850179	0.0933223	0.13264	0.117474	0.0324359	0.0359885	0.0135099	0.0806545
616	A	0.106914	0.0227299	0.109951	0.0719839	0.0567859	0.116245	0.0973331	0.0970037	0.126276	0.0303674	0.153745	0.0477555	0.0617589	0.0578972
619	A	0.156863	0.0619963	0.164498	0.0937354	0.0120192	0.0603956	0.108013	0.14873	0.0826105	0.116304	0.0774336	0.128685	0.237185	0.0705799
628	A	0.0546672	0.0620424	0.0274725	0.0325998	0.0432479	0.0387497	0.0478698	0.0707714	0.0554119	0.0862534	0.020674	0.053118	0.0329164	0.0222395
629	A	0.136612	0.0371563	0.0411241	0.114099	0.021582	0.0128717	0.0287632	0.0405392	0.0276855	0.010805	0	0.0106496	0.0545911	0.0222792
634	A	0.0889878	0.070267	0.0555864	0.0798616	0.0353982	0.0188964	0.142323	0.120728	0.119078	0.11042	0.056684	0.0590958	0.12087	0.104015
640	A	0.0577923	0.114346	0.10628	0.102529	0.0532806	0.0327359	0.0384283	0.100533	0.139561	0.088096	0.0203025	0.0726518	0.0849017	0.0227998
641	A	0.0670819	0.113766	0.0867972	0.135455	0.0986642	0.0735895	0.0194363	0.0812926	0.0376932	0.0333074	0	0	0.0353357	0.034463
643	A	0.121156	0.128282	0.0472545	0.230238	0.1114	0.0645786	0.154232	0.12109	0.103064	0.0552792	0.213176	0.0208073	0.0838574	0.113999
648	A	0.0645816	0.0763035	0.103025	0.0545078	0.0438821	0.0477479	0.0903978	0.104954	0.182219	0.103962	0.125879	0.0569282	0.077074	0.0737101
650	A	0.0276702	0.101635	0.0373587	0.0875753	0.0656072	0.0237756	0.0608396	0.073902	0.0580327	0.0817757	0.0316189	0	0.0279193	0.0368505
653	A	0.101149	0.0927957	0.0836898	0.185084	0.159524	0.0472962	0.050317	0.0523013	0.0480908	0.0926677	0.0626763	0.0677354	0.041713	0.0485909
654	A	0.101224	0.101232	0.130233	0.0762278	0.0870259	0.0631214	0.0302877	0.0418936	0.0289157	0.0347907	0.0209249	0.0113494	0.020887	0.0365631
655	A	0.0460109	0.0589821	0.0464598	0.0762029	0.0652884	0.031511	0.0603197	0.041645	0.0287963	0.0693401	0.0416146	0.0112689	0.0975066	0.0121256
664	A	0.1443	0.200038	0.136986	0.169266	0.128411	0.0859328	0.0634719	0.086627	0.0701262	0.150584	0.0645161	0.157056	0.123849	0.100845
668	A	1.06336	1.14859	1.32916	1.11082	1.06601	0.567721	1.85433	1.46336	1.66878	1.97789	1.76871	0.702399	0.666138	0.984922
669	A	0.033621	0.0105319	0.0113135	0.0130548	0.00862366	0.00897908	0.0303982	0	0.00962186	0.0120802	0.0308705	0.0210904	0.0237154	0.023596
670	A	0.0561924	0.0105519	0.0113623	0.0131096	0.0259359	0.0270222	0.0201593	0.0101843	0.00958865	0.0599952	0.0101978	0.0104921	0.0237304	0.0233754
671	A	0.0574779	0.0431406	0.0232992	0.0268025	0.0177069	0	0.0306122	0.0515783	0.0193874	0.0486796	0.0411989	0.0105843	0.0240693	0.0473709
672	A	0.0461361	0.0541419	0.0116891	0.0404149	0.0534378	0	0.0306091	0.0720832	0.0776473	0.0732601	0.0308642	0.010563	0.00805348	0.0356633
679	A	0.01239	0.0117827	0.0624922	0.0289603	0.00950661	0	0.051488	0.102733	0.0875231	0.0498878	0.120494	0.0222025	0.044049	0.051553
685	A	0.0655136	0.049776	0.0137287	0.0310849	0.0207361	0.0771095	0.127922	0.0925605	0.133794	0.0970335	0.0561924	0.123229	0.078209	0.143678
693	A	0.207065	0.240192	0.0885628	0.249596	0.0630517	0.0655523	0.174115	0.125556	0.136737	0.176919	0.0885152	0.0823433	0.049169	0.0964187
715	A	0.0501421	0.0235534	0.046594	0.0512768	0	0	0.0549089	0.0215401	0.0223639	0.0368234	0	0.0214523	0.0129828	0.0364078
720	A	0.0338123	0.0477175	0.0567537	0.0207018	0	0	0.011526	0.0786871	0.0356041	0.0377548	0.010866	0.0116158	0.0327439	0.0127584
724	A	0.0256608	0.0241119	0.0575871	0.0523889	0.020979	0	0.0475737	0.0582411	0.0372255	0.0645578	0.0113456	0.0364431	0.032962	0.0131268
763	A	0.0562588	0.143843	0.0693241	0.239726	0.0856409	0.0859845	0.0496032	0.0241604	0.128469	0.0716675	0.0251004	0.0341647	0.192012	0.0882353
771	A	0	0.145307	0.0633914	0.182216	0.0953743	0.0987898	0.0857265	0.08604	0.0450248	0.0424989	0.0659921	0	0	0.0553863
776	A	0.0565398	0	0.0567967	0.122011	0	0.0323206	0.0568613	0.0192382	0.0405351	0.0582864	0	0	0.0386847	0.0243427
794	A	0.0213927	0.128713	0.0527649	0.0812898	0.00817528	0.0334448	0.0222767	0.0340059	0	0.0242072	0.0112322	0.0244648	0.0631978	0.0524246
795	A	0.0418892	0.0482905	0.0513452	0.0790306	0.03187	0	0.0435398	0.0665853	0.0354484	0.0359411	0.0110181	0.0120831	0.0138619	0.0650026
802	A	0.0995355	0.146514	0.0662636	0.0732984	0.0386473	0.0204068	0.069979	0.102638	0.0666297	0.0885152	0.0407166	0.021889	0.0685323	0.0469208
808	A	0.0903955	0.0496243	0.0771486	0.0570451	0.0602882	0	0	0.0193648	0.0316056	0.0103627	0.0193461	0.0103455	0.0375134	0.0108944
809	A	0.0896057	0.0775194	0.0613309	0.0943218	0.0359324	0.0254777	0.0559336	0.00959141	0.0940439	0.0102512	0.0287936	0.0205613	0.0533732	0
810	A	0.0673048	0.0846143	0.099655	0.150901	0.0479616	0.0382287	0.00934317	0.0383656	0.0524219	0	0	0	0.0320633	0.0108354
811	A	0.0894188	0.0843704	0.0840914	0.131666	0.0537249	0.0190621	0.0278035	0.0286178	0.0418279	0.0919212	0.0381752	0.0102197	0.0426212	0.0107724
812	A	0.0520523	0.0561837	0.053525	0.0657709	0.0477185	0.0253582	0	0.0380554	0.020879	0.0101978	0.00951656	0	0.0478698	0
813	A	0.0743273	0.0631801	0.114661	0.112793	0.0298436	0.114068	0.027729	0.0476009	0.041806	0.0305935	0.028566	0.0203521	0.154173	0.0428954
816	A	0.0821202	0.0775085	0.0384349	0.0661751	0.0419539	0.0575705	0.038012	0.0389788	0.0857265	0.0627812	0.0788488	0.0209666	0.043136	0.0766703
818	A	0.111823	0.0844238	0.0843364	0.141296	0.0359928	0.0320041	0.0795466	0.050984	0.0791676	0.0543951	0.114108	0.0212902	0.0756471	0.0555494
825	A	0.0371333	0.0279857	0.0773036	0.0658762	0.0548079	0.0193125	0.0301386	0.0627156	0.0813197	0.0769908	0.0108413	0.0210526	0.0492935	0.0642605
826	A	0.097737	0.219159	0.163973	0.104573	0.0617132	0.0721217	0.0102891	0.0215587	0.035868	0.0226372	0.0447227	0	0.0887804	0.0108696
827	A	0.294517	0.333902	0.517241	0.229292	0.266782	0.157884	0.0207447	0.0434783	0.0962696	0.0457038	0.0112625	0.0966806	0.18911	0.054484
830	A	0.201142	0.258693	0.227656	0.194135	0.135934	0.22821	0.23273	0.263158	0.216711	0.173611	0.239316	0.242692	0.328438	0.190135
837	A	0.139193	0.116099	0.130548	0.137431	0.086326	0.10265	0.0879314	0.205198	0.145631	0.0718391	0.0590528	0.0704225	0.117463	0.0935563
847	A	0.14825	0.169511	0.0938841	0.116754	0.0763775	0.0843984	0.105848	0.150912	0.127011	0.0991923	0.0451264	0.0322945	0.0730079	0.014997
849	A	0.0459084	0.0567601	0.0403226	0.0439625	0.054939	0.0243576	0.0402037	0.0278087	0.0572001	0.0859599	0.0764877	0.0329544	0.0423594	0.0151653
854	A	0.259189	0.210625	0.165403	0.184106	0.114325	0.116445	0.210665	0.319311	0.245063	0.257991	0.167862	0.293638	0.113507	0.120446
858	A	0.157431	0.189544	0.115141	0.166945	0.0817795	0.0344828	0.116754	0.122249	0.108662	0.0471846	0.0510899	0.0743771	0.0763709	0
861	A	0.115798	0.149278	0.100503	0.110181	0.104275	0	0.0440852	0.0621311	0.0314268	0.0951022	0.0348068	0	0.0504626	0.0173792
862	A	0.129074	0.0804635	0.0583885	0.0862999	0.0509079	0.0359971	0.0143082	0.120809	0.0461752	0.0770891	0.0510551	0.0184536	0.0152555	0.0326211
864	A	0.174686	0.0787154	0.0187056	0.148588	0.0669232	0.0350018	0.112835	0.0595327	0.0763825	0.0911439	0.0332336	0	0.0891001	0.0159286
865	A	0.0923219	0.107214	0.03641	0.0618557	0.0326744	0.0345006	0.041385	0.0290065	0.149925	0.119119	0.0162285	0	0.0583942	0.0623344
869	A	0.0858001	0.0283206	0.0508216	0.0591017	0.0638774	0.0177809	0.215141	0.239977	0.145879	0.102971	0.0954502	0.103448	0	0.0468019
870	A	0.156161	0.112439	0.117964	0.0784775	0.0319132	0.0354359	0.200938	0.140687	0.116245	0.132295	0.14288	0.0171145	0.0294811	0.0773994
872	A	0.0563698	0.0552868	0.0495622	0.116618	0.0953895	0.035417	0.133833	0.112013	0.115025	0.088718	0.0637552	0.0858664	0.0886525	0.170147
875	A	0.0760264	0.183352	0.233781	0.384078	0.158182	0.0801667	0.402921	0.290352	0.20232	0.207268	0.133988	0.201989	0.10721	0.140647
886	A	0.0369458	0.0470754	0.0272777	0.0340716	0.0138427	0.0156568	0.158885	0.169536	0.135987	0.176247	0.0839043	0.0866229	0.0250878	0.157901
903	A	0.19333	0.128565	0.0558191	0.132385	0.0271407	0.0625782	0.0474271	0.0371471	0.037092	0.102841	0.0676041	0.0356718	0.0766773	0.0581531
904	A	0.181928	0.16459	0.0562035	0.149402	0.0409668	0.031412	0.356676	0.334283	0.186335	0.425367	0.324193	0.29723	0.102538	0.266976
908	A	0.123716	0.191755	0.100531	0.152646	0.0842815	0.0161342	0.103484	0.17838	0.191502	0.151191	0.0650703	0.0923254	0.143155	0.1015
913	A	0.0824063	0.0657981	0.0319132	0.0373483	0.0480231	0.0748783	0.118292	0.164835	0.1611	0.180029	0.21797	0.122535	0.160163	0.21815
916	A	0.041917	0.0807211	0.0493097	0.0570451	0.0494153	0.03861	0.0754636	0.077186	0.0644468	0.0842663	0.0121936	0.0218436	0.0300526	0
919	A	0.139101	0.107556	0.16488	0.0948407	0.116144	0.0767754	0.07313	0.0742942	0.124857	0.0699708	0.106345	0.0524549	0.0300165	0.020555
920	A	0.404858	0.229018	0.430108	0.247383	0.199501	0.0965437	0.429319	0.433725	0.394191	0.349813	0.412639	0.20938	0.272191	0.347862
922	A	0.505634	0.406447	0.380491	0.453291	0.13836	0.231823	0.351737	0.321199	0.37724	0.33377	0.419966	0.344939	0.207505	0.172228
926	A	0.262055	0.23015	0.246204	0.281096	0.142974	0.206897	0.138313	0.202042	0.133047	0.189911	0.120091	0.137552	0.250772	0.274348
938	A	0.137127	0.16835	0.17727	0.148431	0.114416	0.158353	0.099167	0.116099	0.10101	0.142951	0.0651042	0.0861976	0.229847	0.124404
944	A	0.110724	0.0306607	0.0532954	0.0776699	0	0.0183993	0.048605	0.0952653	0.0547995	0.0853242	0.0427716	0.0739332	0.0450045	0.0810866
955	A	0.24728	0.296412	0.200401	0.218427	0.206728	0.0935979	0.0975419	0.122077	0.131961	0.119086	0.126382	0.0212427	0.123474	0.0502765
957	A	0.0820479	0.0620925	0.132758	0.0789422	0.056243	0.0375023	0.0881057	0.0660004	0.106185	0.163097	0.0951877	0.0321509	0.0412882	0.0203583
962	A	0.0894188	0.0983008	0.119689	0.107894	0.0170736	0.0170416	0.0177794	0.052115	0.0323494	0.00986777	0.0485767	0.0302663	0.0582954	0.00948047
963	A	0.0891398	0.0420404	0.0149165	0.125628	0.0170213	0	0.0444405	0.095395	0.0565291	0.108321	0.0194099	0.0200521	0.0346021	0.0471654
964	A	0.059268	0.0279877	0.0595061	0.0537442	0	0	0.0534807	0.060965	0.0485712	0.0887662	0	0	0.0803766	0.0566893
972	A	0.0720807	0.0794732	0.0958428	0.130586	0.0827815	0.0398353	0.0601943	0.0757257	0.0547774	0.0093985	0.0373902	0.0185718	0.0905633	0.0174932
980	A	0.0712831	0.0384763	0.0517331	0.0731529	0.0117578	0.0117994	0.0324491	0.0398343	0.0218357	0.0266548	0.0176788	0.00918442	0.0248488	0.017298
981	A	0.0613246	0.038666	0.0726141	0.109998	0	0.0117261	0.0987004	0.0814266	0.0960118	0.036222	0.026976	0.0745921	0.0573818	0.0612799
983	A	0.0479939	0.0731663	0.108503	0.0693401	0.0879314	0.0221976	0.064082	0.0476304	0.0506586	0.0876885	0.0442439	0.0183537	0.0709499	0.102757
987	A	0.121676	0.116608	0.0647489	0.14919	0.0604534	0.0518242	0.0523052	0.0976489	0.0482393	0.0668729	0.0421017	0.0174277	0.104182	0.0406009
990	A	0.118214	0.113527	0.107401	0.100491	0.0847547	0.140116	0.0925569	0.0776518	0.164709	0.0867528	0.0964151	0.153568	0.145572	0.217865
992	A	0.14218	0.0823045	0.0516102	0.0929692	0.0445038	0.033929	0.0942137	0.118897	0.0586124	0.0704225	0.0360555	0.0278113	0.0632511	0.0844523
996	A	0.143652	0.0962717	0.0300993	0.110951	0.0539665	0.0773994	0.0292462	0.0596392	0.0754924	0.0324649	0.0170242	0.0530973	0.125137	0.0635274
997	A	0.0536961	0.0608167	0.0298507	0.0771265	0.0749304	0.032996	0.0498043	0.0288934	0.0467227	0.0393267	0.0246427	0.0514845	0.0389651	0.0461574
998	A	0.0449196	0.0609703	0.020008	0.0774593	0.0322096	0.0552547	0.0283869	0.0719891	0.0665912	0.0627303	0.0491521	0.0511335	0.0156863	0.0458716
1001	A	0.125809	0.113468	0.11082	0.199005	0.0216193	0.0433651	0.150078	0.109732	0.076516	0.12101	0.0623587	0.0317586	0.108873	0.313069
1008	A	0.0522239	0.0344116	0.010017	0.0762278	0.0321647	0.0226372	0.104079	0.0720792	0.066381	0.050732	0.0297265	0.0385149	0.0322425	0.0563261
1009	A	0.0695713	0.0601633	0.0400721	0.0435445	0.0428357	0.034118	0.0775645	0.0586243	0.0541516	0.0576535	0.0517178	0.0306819	0.0322321	0.0419492
1011	A	0.0705965	0.0786095	0.0204583	0.0886525	0.0217368	0.0229253	0.0462626	0.053526	0.0559528	0.0222305	0.0151378	0.00777001	0.0245078	0.0571143
1012	A	0.061636	0.0697411	0.0204353	0.044287	0.0216849	0.0114364	0.046089	0.0266471	0.0371609	0.0443197	0.0150841	0.00773455	0.0570637	0.0426379
1020	A	0.0350478	0.104739	0.0305344	0.0775451	0.0431732	0.0332816	0.0692782	0.0193361	0.0725777	0.0424929	0.00722335	0.00707564	0.0329652	0.0524556
1023	A	0.176351	0.0878657	0.102512	0.178015	0.0434405	0.0226912	0.0576184	0.0130608	0	0.0359092	0.0365123	0.0216513	0.0427716	0.00669658
1024	A	0.158507	0.271763	0.0818498	0.188994	0.0758808	0.0450045	0.0447713	0.0391262	0.0183587	0.0645346	0.0145762	0.00720202	0.0937367	0.00667379
1027	A	0.10266	0.102794	0.120258	0.105251	0.0339789	0.0243694	0.0392953	0.113447	0.107249	0.0947936	0.0147831	0.0512595	0.149087	0.0757419
1028	A	0.151257	0.10397	0.144525	0.118934	0.0803213	0.0741931	0.0529942	0.0808516	0.140414	0.0958773	0.0895389	0.0892857	0.0566572	0.0560067
1030	A	0.0569044	0.0189555	0.0113033	0.0359238	0.023218	0.0125534	0.170335	0.146771	0.212526	0.0615621	0.101698	0.111235	0.0473754	0.0736648
1031	A	0.331157	0.350246	0.316742	0.419513	0.27894	0.138452	0.858752	0.788955	0.576949	0.790759	0.594672	0.543088	0.188573	0.680775
1034	A	0.0859845	0.066673	0.113225	0.0971817	0.128101	0.0858896	0.0666267	0.13233	0.0472398	0.0910609	0.0548203	0.0622181	0.110752	0.0858922
1035	A	0.142921	0.106657	0.0842637	0.14825	0.0110485	0.0235377	0.0458746	0.0478927	0.0266046	0.00748727	0.0924214	0.0229709	0.0615168	0.042514
1036	A	0.0268553	0.0711048	0.0527371	0.0683917	0.0553036	0.0587682	0.0656513	0.020637	0.0466791	0.0225394	0.0154345	0.0460511	0.0614574	0.0354887
1042	A	0.152658	0.140907	0.0103103	0.0806452	0.0222568	0.06035	0.129879	0.204555	0.16709	0.149701	0.205198	0.224568	0.115095	0.141313
1049	A	0.0731835	0.0400922	0.0681122	0.0667379	0.0127584	0.0133743	0.0429553	0.0371802	0.0654403	0.0408297	0.0409937	0.00800897	0.0196425	0.0381272
1050	A	0.0626109	0.0400842	0.0339789	0.0800854	0.0127113	0	0.0648836	0.0523639	0.0587372	0.0495172	0.00821963	0.0317586	0.0193949	0.0454373
1052	A	0.0732294	0.110753	0.171448	0.0669523	0.0127845	0.0133636	0.0660841	0.0152416	0.0225428	0.033687	0.0252101	0.0246326	0.0492611	0.0238114
1055	A	0.0926975	0.059453	0.0341802	0.105583	0.0247801	0.0256772	0.0654831	0.0605418	0.0455373	0.0335683	0.0167701	0.0482044	0.0481232	0.0777424
1058	A	0.0315027	0.0711889	0.035203	0.0268709	0.0126534	0.0260078	0.045283	0.0714626	0.102153	0.0440956	0.0175979	0.0339847	0.0388274	0.0743372
1060	A	0.0516636	0.0600721	0.0580855	0.0656254	0.0123793	0	0.1321	0.123528	0.281328	0.118884	0.0924214	0.036483	0.00967118	0.0877809
1062	A	0.0305033	0.0393972	0.0229279	0.0385951	0.0122249	0.0127796	0.039188	0.0413907	0.04018	0.0278396	0.0282805	0.0461936	0.00944376	0.0624498
1070	A	0.0562219	0.0548145	0.0215239	0.129993	0.0230601	0.0245339	0.0470995	0.0498339	0.0565702	0.0462107	0.0476599	0.00933532	0.0361337	0.0359131
1077	A	0.0721111	0.0791278	0.062709	0.113404	0.0222668	0.0477099	0.105229	0.153991	0.107589	0.0661939	0.0686813	0.116891	0.0528541	0.112307
1080	A	0.0750539	0.0549652	0.0109709	0.0471865	0.0462481	0	0.0348311	0.0364997	0.0265698	0.0613874	0.031746	0	0.0559441	0.0610749
1082	A	0.0269179	0.0175917	0.0525431	0.0451314	0.0219804	0.011805	0.0248118	0.0522011	0.0339213	0.0390016	0.0405186	0	0.0178508	0
1083	A	0.0967628	0.0516307	0.0825593	0.0771605	0.0214777	0	0.11409	0.0602565	0.0585529	0.0481881	0.0300451	0.00990884	0.0615872	0.00946342
1084	A	0.0704349	0.051644	0.0310302	0.0661449	0.03222	0	0.0325892	0.0172043	0.00835352	0.0385134	0	0.02983	0.0799645	0.0285117
1087	A	0.0371092	0.0632797	0.130237	0.0581125	0.0680812	0.0497884	0.152349	0.125831	0.164616	0.160112	0.063065	0.104297	0.0478011	0.0988435
1093	A	0.178347	0.193878	0.124486	0.183294	0.115252	0.0705916	0.206884	0.189224	0.207528	0.0971188	0.11534	0.137426	0.0984683	0.115183
1100	A	0.0558347	0.1353	0.0854701	0.0515287	0.048583	0.0179598	0.120153	0.0692361	0.0958364	0.0870647	0.0400962	0.0663834	0.0574135	0.0826349
1113	A	0.070502	0.139179	0.0166306	0.0708592	0.0492287	0.0180473	0.0698487	0.16	0.0676666	0.103964	0.0138831	0.0282805	0.082656	0.138696
1119	A	0.0960088	0.107889	0.0470958	0.121972	0.0324886	0.0171999	0.331858	0.336395	0.455253	0.249896	0.293729	0.0290613	0.0911696	0.0656944
1122	A	0.101611	0.200631	0.132057	0.167629	0.0170678	0.0708843	0.0907676	0.0976835	0.0929368	0.0583686	0.0156642	0.0299985	0.1638	0.0404749
1133	A	0.084674	0.116009	0.109349	0.150247	0.0914411	0.0722413	0.0457718	0.0498318	0.0468	0.080171	0	0.0262467	0.10222	0.0120773
1143	A	0.130655	0.111412	0.0522466	0.0853606	0.0179759	0.0987654	0.0318674	0.0460989	0.0219274	0.0867733	0.0650618	0.0117869	0.0515398	0.0430802
1144	A	0.0490918	0.0796813	0.052283	0.0213995	0.036075	0.016442	0.116984	0.0461042	0.0329525	0.111815	0.0130361	0	0.038501	0.032265
1145	A	0.0490276	0.111696	0	0.0427625	0.036075	0.0494071	0.0648088	0.0468165	0.0333519	0.0126103	0.0132433	0.0119531	0.0128222	0.0758643
1148	A	0.0135943	0.0265745	0.0295683	0.142222	0.0152161	0.0147427	0.0195255	0.0425035	0.0510517	0.0687128	0.0484086	0.0110351	0.0679271	0.0405145
1149	A	0.0400855	0.0389762	0.0144655	0.0174368	0	0.0145264	0.0578425	0.0735449	0.0808081	0.0907338	0.0719338	0.0765362	0.0447527	0.060344
1150	A	0.052687	0.0256377	0	0.0687167	0.0147297	0	0.0673336	0.094231	0.0706642	0.0679733	0.0119746	0.0109373	0.0555494	0.100462
1170	A	0.320513	0.198977	0.220289	0.299925	0.148792	0.127241	0.0603656	0.0470102	0.0473979	0.0610998	0.0327297	0.0101719	0.122572	0.0374462
1173	A	0.177253	0.0860832	0.0783875	0.0630676	0.0930233	0.070555	0.15748	0.124724	0.096609	0.0824063	0.0559722	0.041684	0.076864	0.085796
1181	A	0.0831486	0.0821093	0.0329417	0.096073	0.101615	0.0924001	0.0644486	0.114316	0.0798226	0.0928247	0.0414207	0.0408288	0.155703	0.0461467
1182	A	0.101824	0.127772	0.0769908	0.132148	0.0791766	0.0462642	0.137429	0.0970874	0.0713967	0.0932227	0.0416103	0.0511823	0.0389408	0.0740947
1183	A	0.148492	0.137438	0.0662617	0.156872	0.0567859	0.0116144	0.0485633	0.0619086	0.0447989	0.0653717	0.0208312	0.010248	0.0974754	0.0370954
1188	A	0.194643	0.0730527	0.0673023	0.0607829	0.102226	0.083632	0.339629	0.310078	0.43429	0.292343	0.226708	0.302017	0.0989805	0.269231
1189	A	0.121461	0.165411	0.192286	0.220669	0.0571625	0.0120409	0.339213	0.371161	0.27995	0.268766	0.175631	0.0440092	0.0996115	0.0587487
1190	A	0.0662565	0.0837755	0.0921553	0.199005	0.0580316	0.0488818	0.0979955	0.0589739	0.0718538	0.0503829	0.0463553	0.104761	0.0708502	0.0720906
1194	A	0.121986	0.0738484	0.068501	0.123686	0.0344471	0.0731351	0.0972763	0.165918	0.194056	0.120458	0.0692681	0.0820922	0.0504236	0.0517866
1195	A	0.158169	0.137602	0.136008	0.245942	0.0910332	0.0728774	0.087146	0.0671721	0.0707285	0.128649	0.0456361	0.0580181	0.110921	0.11252
1196	A	0.149351	0.0827662	0.0568634	0.184957	0.0342466	0.0243576	0.0440956	0.077332	0.0509996	0.019992	0	0	0.0404613	0.0311526
1199	A	0.0192808	0.150858	0.0466418	0.113751	0.0581328	0.0257136	0.136692	0.0859291	0.0679502	0.143266	0.0129049	0.0816882	0.0105921	0.143524
1200	A	0.0691836	0.193817	0.0958084	0.129887	0.0477042	0.0131579	0.139456	0.185752	0.0922403	0.112259	0.0654622	0.13776	0.0432573	0.206586
1204	A	0.207921	0.184645	0.131093	0.208905	0.143164	0.0265745	0.111709	0.0671517	0.0713436	0.137253	0.0936705	0.0422893	0.0657534	0.0251953
1208	A	0.109649	0.0974089	0.153429	0.132083	0.0702001	0.0752068	0.355872	0.291088	0.247671	0.314395	0.259504	0.250243	0.0744998	0.243102
1209	A	0.129353	0.146213	0.0940513	0.0925803	0.104956	0.0749064	0.186181	0.113662	0.131658	0.216697	0.11839	0.140964	0.0747544	0.122971
1214	A	0.145485	0.0901352	0.094641	0.110972	0.0577234	0.12089	0.154525	0.109144	0.100175	0.0849618	0.141183	0.0602047	0.0433182	0.103977
1217	A	0.0750821	0.0447868	0.0207684	0.0628062	0	0.0550964	0.0898271	0.0497574	0.102354	0.0370508	0.0290192	0	0.0101709	0.0264515
1220	A	0.0671592	0.112063	0.0281822	0.0680349	0.0371644	0.00972573	0.0425532	0.0235349	0.0489656	0.0469098	0.0809607	0.0428878	0.0363471	0.0251953
1223	A	0.0904531	0.202476	0.0826674	0.133259	0.0543232	0.0190223	0.0211797	0.0352278	0.0369595	0.0929908	0.0268889	0.0283487	0.0887942	0.0874344
1228	A	0.047356	0.0524188	0.0179921	0.0106474	0.0261666	0.0093791	0.0434546	0.0240761	0.0643087	0.094451	0.0410959	0	0.0696864	0.0511051
1240	A	0.072388	0.0686499	0.0736988	0.0857817	0.0788091	0.00955932	0.0794071	0.163593	0.0682245	0.0697642	0.0490838	0.0475059	0.026812	0.0719632
1241	A	0.0722543	0.121933	0.0551927	0.107101	0.0962717	0.0476781	0.10463	0.175953	0.186662	0.110834	0.0646935	0.0467217	0.0624944	0.0994883
1246	A	0.0412746	0.0314317	0.0283527	0.0439271	0	0	0.101818	0.0323415	0.132878	0.0299895	0.0175747	0	0.018423	0.0154107
1250	A	0.00829256	0.0315781	0	0.0110193	0.0367242	0.0297619	0.014988	0.033456	0.04004	0	0.0181357	0.0347162	0	0.0158078
1251	A	0.0834725	0.0238436	0.0382775	0.0332189	0.0462577	0.0397377	0.0456969	0.017059	0.061262	0.0156055	0.0184094	0.0174611	0.0187477	0.0158881
1253	A	0.033253	0.0475888	0.0285361	0.0661667	0.0832485	0.039976	0.166339	0.168691	0.120434	0.108309	0.126582	0.155306	0.0283233	0.0790264
1258	A	0.0669232	0.0803084	0.0868558	0.0670092	0.00948137	0.0313972	0.0300345	0.0507185	0	0.0612933	0.0858811	0.0676361	0.0407332	0.190325
1259	A	0.0669961	0.0723589	0.057999	0.0671517	0.0190042	0.0419639	0.0451943	0.101317	0.0988142	0.0921517	0.03427	0.0340078	0.0815578	0.0478164
1260	A	0.0839842	0.0806257	0.0680074	0.112246	0.11469	0.0105921	0.0907716	0.0169779	0.0992851	0.04662	0.0345125	0.120275	0.0826873	0.0323206
1265	A	0.0643656	0.116198	0.0567591	0.0217889	0.019044	0.0211932	0.145985	0.20432	0.201647	0.1228	0.187374	0.227652	0.0701543	0.205038
1276	A	0.229885	0.139762	0.0971581	0.126103	0.0857633	0.0430725	0.0689259	0.0379747	0.0946586	0.0746733	0.0478927	0.0647585	0.164912	0.0796707
1278	A	0.255784	0.23143	0.223861	0.306513	0.292475	0.138547	0.090009	0.0246093	0.0652231	0.0366077	0.0236016	0.126646	0.281426	0.169536
1282	A	0.162135	0.130921	0.125226	0.244579	0.0709119	0.153191	0.0548787	0.142315	0.137517	0.0938527	0.0455944	0.0615082	0.130795	0.0511705
1284	A	0.241352	0.155019	0.117595	0.159095	0.210368	0.106213	0.0222148	0.0240616	0.0125266	0.0832145	0.0228102	0.062004	0.152022	0.0131337
1287	A	0.0550282	0.0534188	0.059997	0.109469	0.0772798	0.0709094	0.153829	0.096258	0.12332	0.141526	0.112638	0.123153	0.121729	0.209397
1291	A	0.179126	0.11396	0.0875876	0.109307	0.0131441	0	0.0213835	0.0351947	0.0359971	0.0458085	0.0327869	0.0238663	0.0662866	0
1293	A	0.107469	0.0911485	0.0887311	0.111592	0.0701672	0.0394529	0.0512348	0.067257	0.104082	0.0776053	0.0735681	0	0.0351617	0.0495786
1295	A	0.125908	0.0903016	0.0996016	0.150527	0.0519913	0.0230388	0.0710516	0.033098	0.0457875	0.109842	0.0310655	0.0215031	0.136885	0.147023
1299	A	0.042452	0.0319132	0.026455	0.077528	0.0272084	0.0305499	0.068346	0.0637213	0.133422	0.0740741	0.019992	0	0.0671527	0.0948092
1301	A	0.0333806	0.0778938	0.086326	0.0867491	0.0528728	0.0297324	0.0589159	0.0642123	0.0111099	0.0425035	0.0501303	0.0516422	0.0561903	0.0590807
1313	A	0.0606107	0.085391	0.0713719	0.0983187	0.0235368	0.00902609	0.0969556	0.0421807	0.119513	0.0829016	0	0.00995718	0.0525348	0.172493
1332	A	0.149517	0.183324	0.119634	0.279965	0.190775	0.0777242	0.245026	0.256647	0.281808	0.220983	0.152891	0.194016	0.301531	0.19802
1344	A	0.0779657	0.0829187	0.0379963	0.0698812	0.0309138	0.0198834	0.0666223	0.0194932	0.028222	0.0914448	0.0251004	0.0177557	0.0271887	0.0371149
1353	A	0.127474	0.212063	0.169924	0.13901	0.111073	0.0533903	0.181488	0.152062	0.249666	0.102743	0.14876	0.118365	0.0843235	0.15312
1357	A	0.140009	0.132706	0.0808516	0.135777	0.0544366	0.0596481	0.106638	0.116186	0.0996181	0.0960892	0.0156801	0.0858664	0.0977108	0.185636
1369	A	0.108277	0.0710693	0.0242822	0.0622326	0.057508	0.0339697	0.0652475	0.0652795	0.0599925	0.0632454	0.0436332	0.0557192	0.0923702	0.0640683
1370	A	0.155474	0.0489769	0.0543544	0.146797	0.044405	0.00673219	0.0485476	0.0566389	0.0445865	0.0537538	0.0360855	0	0.0488251	0.0738942
1376	A	0.0676743	0.0414486	0.034636	0.0511434	0.0240168	0.0387297	0.157989	0.274566	0.230947	0.0880987	0.105611	0.0506476	0.0762732	0.0757576
1378	A	0.0568473	0.0526343	0.0647287	0.103734	0.0430187	0.0200093	0.154548	0.162112	0.204365	0.0850196	0.12711	0.0680066	0.0244424	0.0494413
1379	A	0.0736753	0.0630219	0.0764796	0.0813249	0.0306654	0.0266631	0.0620877	0.038835	0.102805	0.0426658	0.0711896	0.0226775	0.0488579	0.0692589
1382	A	0.0524292	0.0324886	0.0851996	0.0759474	0.0316917	0.020734	0.267822	0.353052	0.328898	0.13866	0.224964	0.153965	0.0572592	0.121114
1383	A	0.519757	0.605427	0.39604	0.401018	0.290266	0.286373	0.897355	1.02753	0.751258	0.936119	0.639535	0.522394	0.269248	0.693328
1386	A	0.0878514	0.117199	0.0865109	0.0816327	0.0614334	0.0428113	0.0527665	0.113852	0.0437764	0.0578847	0.0427411	0.0511958	0.0729105	0.0181061
1388	A	0.0608684	0.0571211	0.0576452	0.104348	0.0582284	0.0893056	0.0626027	0.0630965	0.045617	0.068918	0.059577	0.0973345	0.0912985	0.0925412
1396	A	0.121766	0.153576	0.109317	0.128192	0.0330115	0.0278526	0.0688468	0.104275	0.10079	0.0765697	0.0518538	0.0359228	0.0673911	0.0820176
1401	A	0.0997085	0.0815358	0.0510465	0.108846	0.058309	0.028777	0.0171321	0.0257312	0.0674082	0.0189934	0.0172384	0.0182266	0.0522057	0.0103756
1402	A	0.0763592	0.0221386	0.0507872	0.0590958	0.0331044	0.0286096	0.034089	0.068207	0.100486	0.00943841	0.00856018	0.0180261	0.0260168	0.0102965
1405	A	0.0764059	0.0884695	0.0508388	0.0885565	0.0579135	0.067037	0.0170025	0.0170765	0.00834864	0.0378215	0.00854701	0.0177762	0.0524843	0
1409	A	0.0306349	0.0517637	0.0341413	0.0891001	0.00828775	0.0192068	0.0169319	0.0684873	0.0167757	0.00942241	0.0256871	0.00879662	0.0351339	0.0199144
1414	A	0.155763	0.219378	0.183665	0.121418	0.115364	0.112754	0.0857715	0.106465	0.0860832	0.0528877	0.0575098	0.0688502	0.149821	0.076461
1421	A	0.163915	0.119574	0.188515	0.0934434	0.104302	0.187617	0.0310174	0.083212	0.0406587	0.0685244	0.0406339	0.0411142	0.177426	0.0814332
1438	A	0.121743	0.0366793	0.0563777	0.0311236	0.0741107	0.0405077	0.0922793	0.0201086	0.077332	0.0861326	0.00955292	0.028626	0.152528	0
1439	A	0.0616827	0.0617665	0	0.0628239	0.0621581	0.0135135	0.102722	0.0301963	0.0290501	0.0862162	0.0287356	0.00955566	0.0235101	0.0436777
1446	A	0.262336	0.334821	0.35729	0.457702	0.294623	0.07768	0.203827	0.232481	0.208073	0.151497	0.224857	0.215363	0.0443557	0.157671
1448	A	0.143155	0.0899512	0.0423968	0.163747	0.113608	0.0274085	0.0912513	0.055322	0.134785	0.128415	0.0823554	0.052378	0.114837	0.0123732
1452	A	0.0446628	0.0721605	0.0302847	0.0927472	0.0681942	0	0.103854	0.0670391	0.0527482	0.047259	0.0309885	0.0523725	0.0815186	0.0871622
1454	A	0.215087	0.147754	0.121784	0.0951656	0.0692905	0.112613	0.0457404	0.0332226	0	0.0352361	0.0409668	0.0311042	0.0696541	0
1455	A	0.0874763	0.0555556	0.0579458	0.182315	0.0526177	0.0394529	0.0760126	0.042061	0.0495344	0	0.009758	0.0595179	0.109063	0.0943841
1465	A	0.0951928	0.033036	0.11489	0.0917291	0.0211082	0.051717	0.010021	0.0492902	0.0834647	0.0624935	0.0557155	0.0889592	0.0631199	0.0453875
1469	A	0.0195542	0	0.0194534	0.0125802	0.00897263	0.00875197	0.0283126	0.0186133	0.00879353	0.0395101	0.0266762	0	0.0395038	0.0108826
1474	A	0.0669024	0.0880282	0.047524	0.134903	0.0350201	0.0169133	0.0537057	0.0264831	0.0838715	0.0847458	0.0252419	0.0088881	0.038625	0.0513031
1476	A	0.213034	0.115782	0.0288656	0.136765	0.0353888	0.0256937	0.036049	0.0444129	0.0254604	0.0569909	0.00849329	0.0267905	0.0394726	0.0312272
1480	A	0.113874	0.182307	0.093301	0.134195	0.0605222	0.0423334	0.101095	0.100075	0.143609	0.0633026	0.0644538	0.0334504	0.0623587	0.0595948
1483	A	0.029545	0.0536193	0.0576147	0.0889002	0.0268097	0.0351278	0.170725	0.0971817	0.136717	0.14758	0.0613551	0.0806524	0.0412133	0.0748183
1484	A	0.0788721	0.0447347	0.00958497	0.114723	0.0536721	0.0175855	0.0720266	0.115146	0.051511	0.0691973	0.0616143	0.0179276	0.0247525	0.0319932
1486	A	0.0100422	0.0640263	0.117786	0.0782779	0.0365965	0.0178683	0.108627	0.143036	0.235479	0.21148	0.178031	0.126754	0.0338581	0.117849
1487	A	0.102627	0.0466331	0.0501002	0.147433	0.018767	0.0276243	0.0908926	0.0448551	0.0351587	0.0409249	0.0359389	0.00920048	0.0611407	0.0328407
1489	A	0.0624545	0.0473037	0.050746	0.0135593	0.028436	0.0188288	0.11655	0.132556	0.138086	0.132302	0.097156	0.0452899	0.0449559	0.0655523
1498	A	0.0675752	0.0713776	0.089676	0.177148	0.110453	0.0101978	0.0286807	0.0854701	0.0182715	0.0109481	0.0187741	0.00958773	0.103284	0.0822562
1506	A	0	0.0950771	0.0352609	0.0767578	0.0814001	0.0414809	0.0767975	0.105293	0.0463006	0.0439512	0.0445593	0.0658266	0.0853789	0
1508	A	0.102482	0.0418454	0.0582479	0.151814	0.0405474	0.0206633	0.11629	0.0679744	0.0375728	0.089067	0.0180636	0.0190949	0.0532311	0.0237051
1522	A	0.0642508	0.0365854	0.0400374	0.0169664	0.0531576	0.0656671	0.053135	0.0740662	0.061665	0.0371333	0.063469	0.0185822	0.0592557	0.100465
1531	A	0.0486066	0.0763942	0.0464684	0.0207771	0.0365097	0.025468	0.0805246	0.103116	0.0985653	0.096859	0.0288351	0.0415067	0.0399947	0.0282247
1533	A	0.0814465	0.0765814	0.0310704	0.083212	0.0488998	0.0381971	0.0356761	0.023649	0.0338104	0.085592	0.0197375	0.0213106	0.0934455	0.0584027
1537	A	0.141199	0.0886787	0.0601504	0.16178	0.0482975	0.0125565	0.0961192	0.142552	0.182399	0.143864	0.0893123	0.086627	0.103883	0.102866
1545	A	0.0163345	0.0313185	0.0318776	0.0842283	0.073828	0.0258833	0.0854579	0.0567537	0.0671592	0.0670916	0.0334597	0.0257732	0.0803859	0.0518314
1556	A	0.102828	0.0829876	0.0165755	0	0	0	0.0870777	0.0530879	0.0493583	0.0406091	0.0651381	0.0160179	0.0412485	0
1561	A	0.125786	0.105634	0.086192	0.0958543	0.01365	0.0267058	0.0727141	0.0743909	0.103093	0.0851245	0.0269651	0.0166667	0.0410846	0.0658906
1569	A	0.0178859	0.138793	0.101954	0.142214	0.0562984	0.0964187	0.0503102	0.0694083	0.0474684	0.0197902	0.0287315	0.0341647	0.0942253	0.062383
1579	A	0.0180995	0.0708717	0.0349284	0.0240327	0.0295639	0.0151814	0.0311429	0.0646099	0.0302572	0.0367444	0.0139587	0.0174307	0.0431717	0.0407747
1580	A	0	0.0353232	0.0173974	0.0239063	0.0287894	0.0147275	0	0.0475662	0.0148765	0.0543281	0.0137118	0	0.0430354	0.0200321
1588	A	0.0202429	0.041511	0.0640205	0.25663	0	0	0.0344768	0.0181686	0.0700894	0.0601082	0	0.015456	0.136309	0
1589	A	0.0594648	0.061187	0.0623312	0.0278242	0	0	0.0334169	0.0174948	0.0511247	0.0390778	0.0115594	0	0.0998835	0
1594	A	0.452117	0.38478	0.30561	0.37714	0.128315	0.060051	0.2904	0.19559	0.385356	0.158228	0.0800091	0.0810154	0.236207	0.0686499
1601	A	0.125287	0.13181	0.113379	0.0572082	0	0.0142613	0.0171233	0.106895	0.071314	0.0397931	0.0109278	0	0.033173	0.0226501
1607	A	0.0445038	0.0706547	0.0242307	0	0.0145159	0	0.0528448	0.018423	0.0366838	0.0410341	0.0439367	0.0377596	0	0.0457875
1614	A	0.128535	0.0226655	0.0466853	0.0847218	0.0142613	0.0146972	0.0859697	0	0.0880747	0.0201694	0	0	0.0695048	0.112032
1619	A	0.061237	0.063925	0.0895255	0.0803643	0.0137306	0	0.0849041	0.157398	0.173521	0.0996413	0.0480538	0.0218079	0.100284	0.133067
1620	A	0.10202	0	0	0.106695	0.0137005	0.0140371	0.187553	0.263574	0.122207	0.160289	0	0.0327118	0.0832917	0.178651
1623	A	0.160321	0.104275	0.0652458	0.183054	0.0401606	0.0266773	0.0175193	0.0360101	0	0.0620604	0	0.010898	0.0491723	0.0947867
1630	A	0.25053	0.221551	0.276067	0.230947	0.0731529	0.0118385	0.501253	0.427249	0.435519	0.638978	0.212831	0.0687837	0.140078	0.0293083
1633	A	0.10014	0.0630782	0.110619	0.0800641	0.110824	0.0345742	0.0980633	0	0	0.0286205	0.0424088	0.0473541	0.0311187	0
1634	A	0.0570125	0.0589507	0	0.0504032	0.0228441	0.0622213	0.0714796	0.0744417	0.103708	0.0829876	0.123533	0.0452131	0	0.0292997
1637	A	0.0355366	0	0	0.0475285	0.0319591	0.00938967	0.252351	0.261593	0.480891	0.239744	0.0778968	0.0968471	0.0131113	0.14476
1640	A	0.0163159	0.0651784	0.016952	0.0436967	0.050388	0.0279903	0.0774994	0.0268528	0.056899	0.146199	0.0498206	0.0983607	0.0776096	0.1
1641	A	0.0609013	0.0600962	0.0156789	0.0615258	0.0189143	0	0.0511378	0	0.0280584	0.11544	0.00980681	0.0108295	0.0250658	0.0332336
1647	A	0.0873471	0.0959693	0.0493644	0.11974	0.0566022	0.0400769	0.20202	0.338718	0.4368	0.0569314	0.219436	0.140598	0.0345304	0.0689655
1650	A	0.102498	0.0735925	0.0631552	0.122936	0.0687699	0.0166016	0	0.0277085	0.0573723	0.03003	0.0355534	0.0521241	0.0119005	0.0714031
1651	A	0.0767951	0.110335	0.0755858	0.0702494	0.051542	0.0414731	0.134662	0.0554017	0.0855676	0.0298597	0.0591366	0.0130073	0.0356633	0
1661	A	0.0533476	0.0382946	0.0261677	0.0744463	0.054605	0.0263922	0.0228415	0.04584	0.0447828	0.0268312	0.0241604	0.0397614	0.0635486	0.0594707
1663	A	0.0802676	0.0511117	0.0262536	0.112339	0.0456538	0.0176476	0	0	0.044405	0.0804937	0.0365497	0.0268889	0.0509424	0
1664	A	0.187266	0.0638814	0.105014	0.0561693	0.0456579	0.00882223	0	0.0678733	0.0662691	0	0.0121477	0.0133387	0.076365	0
1675	A	0.137043	0.0912647	0.0408441	0.096637	0.0755216	0.0179582	0.0380373	0.0376152	0.0535523	0	0.0127259	0.0132398	0.0521785	0.0218341
1678	A	1.19399	1.00541	0.996767	1.01964	1.27668	0.493761	0.519192	0.366367	0.454864	0.366804	0.42357	0.128337	0.541586	0.271116
1679	A	0.0791557	0.0759494	0.0266276	0.0184264	0.0276625	0	0	0.0181028	0.0695169	0.0225887	0.0246548	0.0381437	0.0255754	0.0206825
1695	A	0.143781	0.13913	0.11383	0.127779	0.0407553	0.0762195	0.0686577	0	0.0305904	0.0676133	0.0280426	0.0286862	0.0675068	0
1697	A	0.0786627	0.0949487	0.103498	0.0833102	0.0916031	0.0730727	0.017963	0.0511858	0.0788271	0.023596	0.10479	0.075884	0.130856	0.0396825
1699	A	0.108155	0.125287	0.278875	0.0912131	0.242508	0.234834	0.143988	0.119027	0.234375	0.141978	0.18648	0.0621311	0.302613	0.0974279
1712	A	0.132714	0	0.196657	0.41632	0	0	0.0344768	0.0326904	0.0299805	0.0459348	0	0	0.0565291	0.0700771
1715	A	0.134318	0.0689655	0.197239	0.0826446	0	0	0.0552079	0.06965	0.0485123	0.0239808	0.0361011	0.0528634	0.111483	0.0365898
1719	A	0.904977	0.734803	1.05465	0.801282	1.46138	0.488486	0.109629	0.0347041	0.178629	0.13986	0.0880902	0.0696864	0.647948	0.10987
1724	A	0.180723	0.313676	0.169492	0.228137	0.065703	0.0690131	0.0549853	0.0876271	0.0659848	0.0909918	0.0176929	0.0181951	0	0.0575153
1731	A	0.377562	0	0	0.0682128	0	0.0658762	0.133988	0.0437158	0.0634786	0.078125	0.0205255	0.021777	0	0.0240096
1735	A	0.301054	0.212993	0.062422	0.256246	0.158228	0.209059	0.114811	0.134048	0.0649773	0.10568	0.170032	0.187135	0.285442	0.0497018
1745	A	0	0.0548847	0.0542888	0	0.0520562	0	0.0573888	0.0851064	0.0549904	0.0621311	0	0	0.0838223	0
1768	A	0	0	0	0	0	0	0.109051	0.075662	0.120135	0.0614628	0.0247893	0.0711575	0.0428449	0.117509
1781	A	0.139018	0	0	0	0	0	0	0.0286205	0	0	0	0	0.0737735	0
1788	A	0.138504	0	0.0941176	0.188798	0	0.0486381	0.0140548	0.0662515	0.0246154	0.0359324	0.0136668	0.0138102	0.0365631	0.02886
1790	A	0.275862	0.192031	0.141044	0.313283	0	0	0.0556948	0	0.0122309	0	0.027274	0	0.0365898	0
1791	A	0.0460193	0.0959693	0.0469484	0.0626174	0.0431593	0	0.0694734	0.0524728	0.012216	0	0	0	0.146359	0.0287398
1793	A	0.137931	0.192771	0.0473485	0.188679	0.0867679	0	0.0277894	0	0.0244499	0.0535427	0	0	0.147113	0.057612
1800	A	0.185874	0.0974184	0	0	0	0	0.0137836	0.0129988	0	0	0	0.0138619	0	0
1801	A	0.0464684	0.0973236	0	0.0637755	0	0	0.0275406	0.0519548	0.072648	0.0707214	0	0	0	0
1806	A	0.0924642	0.0965251	0	0	0.0440723	0	0.054727	0.0646663	0.0723415	0.0882457	0	0.0138427	0	0.042523
1809	A	0.0461467	0.144998	0.0471698	0.126662	0	0	0.0961671	0.0389813	0.0606428	0.0708843	0.013725	0	0.03663	0.0141864
1813	A	0.0921659	0.144788	0.046729	0	0.0865801	0	0.0137627	0.0782473	0.0486677	0.0889996	0	0	0	0.0710227
1815	A	0.141509	0.14742	0.0475285	0.0640205	0.0877193	0	0.0561167	0.0132926	0.037281	0.0182482	0	0	0	0.0432028
1818	A	0.14556	0.201309	0.0484966	0.19698	0.0898069	0.103466	0.0718701	0.0824516	0.0637105	0.11274	0.0145328	0.099333	0.0377501	0.0729501
1819	A	0.388727	0.100806	0	0.0658328	0.0899281	0.0517331	0.0575291	0.0550131	0.0892516	0.0564016	0.0145412	0	0.0755002	0.02918
1822	A	0.205023	0.0530504	0.0503778	0.0700771	0.185787	0	0.132023	0.310515	0.300261	0.211457	0.300616	0.129945	0.0780336	0.103888
1823	A	0.102775	0.0531067	0	0.280308	0.186133	0.107354	0.0293988	0.0989959	0.0523903	0.154172	0.0452011	0.0433589	0.0390168	0.029753
1824	A	0.257202	0.159574	0.0504796	0.28169	0.0465983	0.161117	0.0294985	0.0425592	0.0394477	0	0.0302206	0.0289561	0	0.0447962
1825	A	0	0.0537924	0.0508647	0	0.0938527	0	0.121194	0.0435603	0.0673764	0.09996	0.0155207	0.0147645	0	0.0461894
1831	A	1.06383	0.671141	0.923295	0.571973	0.884397	0.92437	4.63506	5.05236	5.04465	5.27612	5.94001	4.81112	1.30976	3.80087
1832	A	0.814996	0.594228	0.574241	0.316122	0.42343	0.278293	0.581594	0.638655	0.783208	0.458716	0.47619	0.322729	0.215827	0.122299
1834	A	0	0.0970874	0.190658	0	0.164474	0.103627	0.156863	0.0386847	0.216685	0.104877	0.0910332	0.0515996	0.237718	0
1835	A	0.0957854	0	0.196271	0	0.170648	0	0	0.15625	0.219138	0	0.275989	0.104712	0.160385	0.0931966
1845	A	0	0.666667	0	0.769231	0.446429	0	1.52091	1.02669	1.32576	1.09589	3.18471	0.431034	0	0.549451
1850	A	0	0	0.961538	0	0	0	0.395257	2.08333	1.76678	1.92308	1.36986	1.5625	0	0
1851	A	0	0	0	0	0	0	0.41841	0.460829	0.373134	0.684932	1.53846	0	0	0
1859	A	0	0	1.11111	0	0	0	0	0	1.0989	2.04082	0	0	0	0
1860	A	0	4.54545	0	0	0	0	0	0	0	0	0	0	0	0
1863	A	0	0	0	0	0	0	5.88235	0	0	0	0	0	0	0
1866	A	32.1429	9.52381	28.8136	11.1111	21.5385	23.6364	2.77778	15.625	6.45161	8.69565	7.14286	4.34783	13.4328	10.5263
1869	A	0	0	0	0	0	0	14.2857	0	0	0	0	0	0	0

## Sheet: C>A
18s location	forward strand reference base	WT NaBH4 2-NH2-d-ATP HIV	75% WT NaBH4 2-NH2-d-ATP HIV	50% WT NaBH4 2-NH2-d-ATP HIV	25% WT NaBH4 2-NH2-d-ATP HIV	WT untreated 2-NH2-d-ATP HIV	WT untreated dNTPs HIV	WT NaBH4 d2-NH2-d-ATP SSIV	75% WT NaBH4 dNH2-ATP SSIV	50% WT NaBH4 2-NH2-d-ATP SSIV	25% WT NaBH4 2-NH2-d-ATP SSIV	WT untreated 2-NH2-d-ATP SSIV	WT untreated dNTPs SSIV	WT NaBH4 dNTPs HIV	WT NaBH4 dNTPs SSIV
3	C	1.96078	1.53846	1.36986	0	1.14943	2.63158	0	0	0	0	0	0	2.46914	0
4	C	0.833333	0	0	0.892857	0.520833	0	0	0	1.1236	0	1.42857	3.22581	0	0
13	C	0.226244	0.18622	0	0	0.177305	0.630915	0	0.0805153	0	0.55991	0.268817	0.192493	0	0.339751
14	C	0.144509	0.12837	0	0	0.115875	0	0.194932	0.0876937	0.101971	0.117096	0.0649773	0.182732	0	0.0535045
17	C	0.26178	0	0.251889	0.243309	0	0.151515	0.0573723	0.0729395	0.0401606	0.0220119	0.0190549	0.0608088	0	0.0665779
18	C	0.0752445	0	0.075643	0.107527	0.0677507	0.136986	0.0851644	0.0163747	0.0176678	0.0384911	0.0505391	0.0851789	0.129534	0.121951
24	C	0.114943	0.0597015	0.0616523	0	0	0	0.0141844	0	0.0144991	0.0309406	0.0140174	0	0.0914077	0.0496524
30	C	0	0.0517598	0	0	0	0	0.0114771	0.0113097	0	0	0	0	0.0627746	0
35	C	0.0918695	0	0	0	0	0	0.0327869	0.0323555	0.0230362	0.0119474	0	0	0.17192	0
37	C	0.0379219	0.0841043	0.0463392	0.119689	0.0804182	0.0504286	0.0366267	0.0531679	0.0194799	0.0493925	0.0181604	0.0112727	0	0.0810279
48	C	0.105042	0.0776699	0	0	0	0	0.0477403	0.0234981	0.0345602	0.0256432	0.0160681	0.0685871	0.0436681	0.0201593
49	C	0	0	0.0437445	0.0539374	0	0	0.0155836	0.0307953	0.00846812	0.00837872	0	0.0192178	0	0.00986485
53	C	0	0.0740741	0.042735	0.208008	0.036245	0	0.0224148	0.0222338	0	0.0400481	0	0.00913159	0	0.0187283
58	C	0	0.0350385	0	0.14742	0.0695169	0.0429185	0.028488	0.00708717	0.00774954	0.0379219	0	0	0	0.0178508
65	C	0.0315956	0.0352609	0	0	0.0361011	0	0.027861	0.0138552	0.022805	0.0147678	0	0	0.0395101	0.0261188
67	C	0.0637349	0.0716846	0	0.148515	0	0	0.0277219	0.0482027	0.0227169	0.014666	0	0.0083689	0.0401445	0.0346081
69	C	0.0614439	0	0.253058	0.0471698	0.0353982	0.04095	0.0138036	0.0068348	0.0301273	0.0145741	0.014041	0.0166251	0.076599	0.0344027
72	C	0.204394	0.0851064	0.068306	0.185529	0.0575209	0.127755	0.0135584	0.00671817	0.0147232	0.02145	0.0205917	0.0321363	0.0603136	0.0419041
73	C	0.231125	0.0865052	0.0344234	0.0735294	0.201381	0.0659848	0.0287398	0.0214316	0.00774893	0.0148854	0.0216528	0.00861252	0.0608273	0.0177557
78	C	0.0291971	0.0649984	0	0.0821018	0	0.0350018	0.0400601	0.0203335	0.0110534	0.02983	0.0101864	0	0.0317763	0.0426257
86	C	0.0914704	0.151783	0.0989446	0.197304	0.109051	0.0286862	0.0310238	0.0313087	0.0229542	0.0608828	0.0204353	0	0.027137	0
89	C	0.0614376	0.044405	0.0292141	0.029146	0.0237756	0	0	0.0105731	0	0.0305437	0.0205444	0.0205994	0	0
96	C	0.0350263	0	0.0242014	0.0981595	0.0196464	0.0262055	0.0457823	0.0113869	0	0.0108331	0.032769	0	0.0268745	0
98	C	0.0358423	0.0552588	0.0737644	0.0747943	0.0595474	0.0277085	0.0274123	0.027972	0.028641	0.0504541	0	0	0.0573066	0
106	C	0.0151538	0.0154655	0	0.0419727	0.0161212	0.0222272	0.0565419	0.011489	0.0121403	0.0212585	0	0	0.0462428	0.0509035
117	C	0.0690322	0.055517	0.0182582	0.0757002	0.042517	0	0.0109469	0.0325662	0.0119474	0.0309342	0	0.0132802	0	0.0385555
118	C	0.040568	0.0406339	0.017838	0.0554426	0	0	0.0106815	0.0105208	0.0348392	0.010013	0	0	0.0214592	0.0500063
125	C	0.0357739	0.0120671	0	0.0654236	0.0360274	0.017343	0	0.00851209	0.0192271	0.0168407	0.00809192	0.0221828	0.0186254	0
127	C	0.125499	0.0690926	0.0441176	0.0632511	0.0458663	0	0.0161199	0.00800256	0.0181061	0.0320924	0	0	0.0899928	0
129	C	0.0567795	0.0228885	0.0293083	0.062315	0.0342544	0.0166722	0	0.0385238	0.0437484	0.0231893	0.0368596	0.010353	0.0357334	0.00996413
131	C	0.0233727	0.0704804	0.0150784	0.0480384	0.0350385	0.0174004	0.0155292	0.0154667	0.0262858	0.0155872	0.0148887	0.0105441	0.0185082	0
133	C	0.0592066	0.0358895	0.0306232	0.0162734	0.0475624	0	0.00773694	0.0154476	0.00879044	0.0155219	0.0149098	0.0105496	0.0186986	0
134	C	0.0476417	0.0240877	0.0154847	0.0328731	0.0239149	0.0358809	0.0232468	0.0387207	0.0264714	0.054726	0.00749064	0.0105955	0.0752729	0
136	C	0.0359669	0.024216	0.0311721	0.115779	0.0361098	0.0543675	0.00770416	0.0230982	0.0176882	0.015586	0.0149745	0	0.0189251	0.0100766
138	C	0.0839631	0.0727979	0.0313136	0.0331345	0.0241138	0.036324	0.0231446	0.030869	0.00887784	0.0234834	0.0150353	0	0	0.0305095
139	C	0.108238	0.0486618	0.0470514	0.0830427	0.0604449	0.0182749	0.0309837	0.00774533	0.0267308	0.0236165	0.00755059	0	0.0381534	0.0307692
142	C	0.0751127	0.0126711	0.0323468	0.0859993	0	0	0.0316681	0.00795925	0.00917768	0.0402674	0.00779849	0	0	0.0107945
151	C	0.0135796	0.0554247	0.0345662	0.111379	0.0412598	0.021978	0.0160385	0	0.00944287	0.0165071	0	0	0	0.0229226
162	C	0.0147493	0.0462107	0.0186881	0.061894	0.0755287	0.0453309	0.00784068	0.00804117	0.00925583	0.0170111	0.0160218	0	0	0
168	C	0.0277047	0.042206	0.0701754	0.0385728	0.0269978	0	0.0371333	0.0280794	0.0103381	0.0412584	0	0	0.0522603	0.0503145
174	C	0	0.0142796	0.0181028	0.0575374	0	0.049505	0.046215	0.0560905	0.0305623	0.0415326	0.0186933	0.0118765	0	0.024423
178	C	0.0263331	0.0551116	0.0528914	0.0179921	0.0413793	0.0462535	0.09783	0.143665	0.144802	0.201755	0.0723589	0.0220604	0.0491039	0.0919857
179	C	0.0888099	0.0926661	0.0515553	0.104076	0.039968	0.135014	0.0259853	0.060859	0.0925583	0.108161	0.0783904	0.0751799	0.0484966	0.215249
182	C	0.107617	0.049894	0.11626	0.112522	0.138347	0.103907	0.142462	0.211864	0.140585	0.0869901	0.176797	0.173151	0.181159	0.175016
186	C	0.11655	0.149454	0.154457	0.164805	0.164547	0.167705	0.117948	0.149462	0.11592	0.125185	0.137444	0.066541	0.131926	0.0358723
188	C	0.0737354	0.135849	0.0669942	0.147493	0.208395	0.0713946	0.0612058	0.061862	0.088054	0.0234962	0.0401849	0.0444	0.100883	0.0488281
192	C	0.104043	0.270921	0.132333	0.202466	0.206277	0.186872	0.0640342	0.0429323	0.030429	0.0123153	0.0104199	0.011288	0.0962696	0
193	C	0.0150286	0.0302893	0.0221435	0.0186637	0	0	0.0108495	0.0217912	0	0	0	0	0	0
194	C	0.0450653	0.0603956	0.0660939	0.0371264	0.0442674	0	0.0109158	0	0.0102817	0.0126904	0.0105764	0.0114064	0.238493	0.0129232
195	C	0.0299446	0.0150466	0	0.0370028	0.117716	0.0466636	0.0109087	0.0547166	0.0204834	0.0380952	0	0.0227169	0.189215	0.0129016
196	C	0.0444115	0.0149031	0.0214133	0.091878	0.014518	0	0.0438068	0.0220264	0.0203666	0.0381728	0.063065	0.033337	0.0218245	0.0511117
199	C	0.0279877	0.0415053	0.0743909	0.0171233	0.0266205	0.16488	0.0436777	0.0218388	0.0706286	0.0380084	0.0207684	0.0218842	0.0764526	0.0126743
201	C	0.0666045	0.0652827	0.118463	0.0817261	0.0376364	0.0584112	0.0323799	0.0215123	0.059125	0.0499376	0.0306811	0.0216286	0.106101	0.0250878
212	C	0.0215959	0.0207039	0.0124131	0.0267523	0.0301326	0.0152091	0.067127	0.0285307	0.033428	0.078449	0.0540005	0	0.077101	0
216	C	0.0323764	0.0309246	0.0367017	0.0131492	0.0302816	0	0.0202368	0.0396944	0.0428376	0.0233046	0.00930579	0	0.0362056	0.0238578
223	C	0.0216708	0.062487	0.0121374	0.052521	0.0207383	0.0436554	0.052687	0.0825508	0.087184	0.108473	0.096768	0.0530335	0.0773054	0.0995644
228	C	0.0352775	0.0573394	0.0393494	0.0849618	0.0353732	0.0146929	0.210107	0.17758	0.214973	0.20555	0.0962258	0.15882	0.0427213	0.112796
233	C	0.119789	0.104505	0.0924947	0.215827	0.0833234	0.074228	0.111857	0.0897868	0.0664137	0.0262467	0.10812	0.0791855	0.0749705	0.0251541
234	C	0.0609756	0	0.026571	0.0146542	0.011966	0	0.0345066	0.0229806	0.00963763	0.0270526	0.0220507	0.0355072	0.0545852	0.0802139
237	C	0.0491823	0.0472925	0.0661989	0.0444379	0.0239894	0.0457108	0.0805153	0.034459	0.0580439	0.0542226	0.0765529	0.0944064	0.0214777	0.0929368
238	C	0.0893883	0.0487389	0.0537996	0.123324	0.0855223	0.0948917	0.133967	0.0850443	0.0901984	0.171453	0.0688784	0.0255853	0.0769823	0.028748
239	C	0.0919601	0.124688	0.0271592	0.0474458	0.0497141	0.0479616	0.0367872	0.048852	0.0304569	0.0718391	0.0347947	0.050755	0.0770501	0.0424989
243	C	0.0454683	0.099319	0.0432776	0.110803	0.0137817	0.0524384	0.149599	0.10688	0.0885347	0.063806	0.0627195	0.19071	0.0575573	0.0603865
246	C	0.0486539	0.075861	0	0.0197746	0.0147275	0	0.0142613	0.0279213	0.0697756	0.0168294	0.0263678	0.0561877	0.0724813	0
247	C	0.0486539	0.0304275	0.0302893	0.0198649	0.0147232	0.0179856	0.0555556	0.0272331	0.0342505	0.0330142	0	0.0135833	0.0240587	0.0309645
248	C	0	0	0.0303398	0.0404858	0.0147732	0.0179565	0.027222	0	0	0.0162075	0	0.0132135	0.0122911	0.0452967
249	C	0.0790264	0	0	0.137795	0.0572328	0.0174155	0.0254097	0.0375704	0.0322963	0	0	0.0123457	0.0361489	0
251	C	0.0155376	0.0581987	0.014708	0.0581508	0.0140726	0.0170619	0.0121981	0.0240211	0.0207426	0.058292	0.0222717	0	0.0238039	0.0411297
253	C	0.0564812	0.0265393	0.0278048	0.105356	0	0.0157356	0.0339405	0.0445732	0.0192511	0.0134409	0.0309534	0.0225785	0.0227713	0.0128271
254	C	0	0.0132048	0.069377	0	0	0.04662	0.0225124	0.0222148	0.0287081	0.0267308	0.0102796	0	0.0339712	0
257	C	0.0412541	0.0389156	0.0138141	0.0686106	0.0124085	0.0154297	0.055457	0.0438308	0.0189484	0.0262847	0.0102229	0.045527	0.0231884	0.0632431
258	C	0.0270161	0.0127243	0	0.0336644	0.0243487	0	0.0328731	0.0216099	0.0374462	0	0.0101297	0	0.0574647	0.0250784
259	C	0.01386	0.10575	0.131043	0.330895	0.0382458	0.015758	0.0438837	0.0650407	0.0469704	0.181889	0	0.022779	0.0482334	0
260	C	0.0126231	0.0241225	0.0276319	0.032457	0	0	0.0105831	0	0.00913826	0	0.00990884	0.0111396	0.0118582	0.0363945
263	C	0.0126422	0.0121803	0.0143988	0.0326904	0.0362538	0	0.0418717	0.0207168	0.0275305	0.0372949	0.039374	0.0333482	0.0251162	0.0120744
264	C	0	0.025	0.015193	0	0.0251383	0.0164258	0.0422342	0.0104254	0.00932314	0	0.00994135	0.0225048	0.0133618	0.0242483
271	C	0.0127828	0.0125628	0.0309262	0	0	0.0331126	0.0208855	0.0614628	0.0740056	0.060241	0.0682328	0.032443	0.0691372	0.0234962
275	C	0	0	0	0.0358938	0.0413223	0	0.022748	0.0336927	0.0207404	0.0384172	0.0425713	0	0.0148368	0.0242836
277	C	0.0276434	0.0550737	0	0.0716846	0.0138141	0.0353544	0.0113353	0.0223964	0.103972	0.102276	0.0320376	0.0115607	0.0458505	0.0246883
278	C	0	0.0407166	0	0.0176149	0.0271592	0.0172236	0.033241	0	0.0101112	0.0125455	0.0312598	0.0565867	0.0596303	0.0484086
281	C	0.0137325	0.0412371	0	0	0.0274914	0	0	0	0.0101194	0.0125345	0.0417973	0.0115154	0.0467873	0.0125031
284	C	0.0684932	0.0137118	0.0534188	0.0530786	0.0273411	0.0530598	0.0110865	0.0325733	0.0101297	0.0125031	0	0	0.0151791	0
293	C	0.0362363	0.0119446	0.0453789	0.0156299	0.0111645	0	0.0306435	0.00997805	0.0178891	0	0	0.0111198	0.0256082	0.0246518
295	C	0.0224391	0.0331969	0.0559989	0.102309	0	0.0404149	0.0664957	0.0466592	0.0169276	0	0.0353357	0.0103061	0.0236323	0.0567472
303	C	0.00935104	0.0369959	0	0.0363813	0.0252143	0.0118413	0.0267929	0.035417	0.0162522	0.0104778	0.00846024	0.010001	0.0321578	0.0338142
304	C	0.0437675	0.0522057	0.0113585	0.0227195	0.0241099	0.0116252	0.025641	0.0512295	0.0393732	0.0399122	0.0410273	0	0.0206932	0.0438452
306	C	0.102669	0.136135	0.111707	0.24374	0.0792581	0.0694123	0.29838	0.289534	0.322327	0.197511	0.278757	0.287584	0.12352	0.229885
310	C	0.0664389	0.0558555	0.0485614	0.0485319	0.016942	0.0124456	0.0193237	0.0481093	0.0779693	0.0667408	0.0657957	0	0.0335646	0.0124891
311	C	0.0189233	0.0831255	0.0597229	0.048432	0.025134	0.012164	0.0186012	0.0278707	0.0579806	0.0217037	0.0359939	0.0221312	0.0659558	0.012089
315	C	0.0565291	0.0911743	0.0469539	0.0359669	0.0672099	0.0243694	0.0363669	0.0450653	0.0570916	0.0323485	0.0352765	0.0538329	0.0980285	0.0839832
317	C	0.0362056	0.00873591	0.0676895	0.0574647	0.0325256	0.0233263	0.0265957	0.00876501	0.0238968	0.0313349	0.0345871	0.0105119	0.0415024	0.0116537
319	C	0.0269107	0.0258866	0.0336172	0.0455322	0.0161082	0.03465	0.0702247	0.0868131	0.0709388	0.103327	0.0769362	0.0722469	0.030744	0.114012
321	C	0.0682195	0.00939938	0.0242336	0.0972763	0.0345752	0	0.0363736	0.0360263	0.0488679	0.0318979	0.017632	0.0105574	0.0317662	0.0353815
322	C	0.0489908	0.0472679	0	0.0122309	0.0347041	0.0121197	0.0273423	0.0723066	0.00814266	0.0212947	0.0176554	0.0105597	0.0736997	0.0588305
323	C	0.00986096	0.0189843	0.0485673	0.0244648	0.0432938	0.0121389	0	0.0181077	0.00812744	0.0213584	0	0	0.0314895	0.0117564
324	C	0.0486997	0.0372682	0.0352734	0.0480134	0.0253207	0	0.00904241	0.0178859	0.0319565	0	0.0086881	0.0207404	0.0204813	0.0232639
325	C	0.0292512	0.111878	0.0117137	0.0119789	0.0506073	0.0119689	0.0540882	0.0445276	0.0715137	0.0317561	0.0432489	0.0515943	0.0204562	0.0116063
326	C	0.029383	0.0374287	0.0585138	0.0599952	0.0253571	0.0239636	0.0178971	0.0354202	0.0157828	0.0105641	0	0	0.0407789	0.0345781
331	C	0.0295217	0.0281928	0.0702494	0.036049	0.0170198	0	0.00888573	0.0175855	0.00783515	0.0211305	0.00861698	0	0	0.0349487
334	C	0.0195599	0.0187091	0.0116713	0	0.025508	0.0121139	0	0.0427716	0.0230716	0.0507048	0.0168976	0.0408372	0.010201	0.033742
337	C	0	0.0188271	0.0117137	0.0362363	0.00855945	0.0243932	0.00862887	0	0.00773994	0.0101657	0	0	0.0205276	0.0112638
340	C	0.0792393	0.104068	0.0937537	0.109836	0.12931	0.0747198	0.0257047	0.0170955	0	0.0100543	0	0.0103595	0.062637	0
341	C	0.0495933	0.0378967	0.0351	0.0122085	0.0431444	0.0496032	0.0170823	0.00852951	0.0154154	0	0	0.0102934	0.0314895	0
342	C	0.0494854	0.0473619	0.0116822	0.0488162	0.00861995	0	0.0340628	0.0255167	0.00768049	0.020028	0	0	0.010502	0.0111495
346	C	0.046477	0.035791	0.0329164	0.0805802	0.0414422	0.0239464	0.0236388	0.00785793	0.0141663	0.00921999	0.00782228	0	0.019972	0.0100695
350	C	0.0192641	0.0278784	0.01146	0.035898	0.0176632	0	0.00808342	0.0322763	0.0218611	0.0475602	0.00805088	0.0193181	0.0746428	0.0410889
353	C	0.0307724	0.0797607	0.0862919	0.0761325	0.0392542	0	0.111159	0.154057	0.16215	0.111044	0.102934	0.0621633	0.0477156	0.0653097
356	C	0.0115287	0.0341219	0.0423191	0.0284414	0.0350099	0.0502849	0.0476417	0.0284468	0.0502176	0.0222395	0.0191314	0.0229121	0	0.0237954
357	C	0.012164	0.0239779	0.0147842	0.0150105	0.0248016	0	0.00991965	0.0493681	0.0519076	0.0807196	0.0595415	0.0118751	0.0565371	0.0734125
358	C	0.170261	0.125523	0.11923	0	0.105011	0.0867115	0.042694	0.0641505	0.0648809	0.0492126	0.0644192	0.0266064	0.130336	0.0657376
362	C	0.0142106	0.0560617	0.0169377	0.0172921	0.0150966	0	0.0201593	0	0	0	0.010022	0	0.0321337	0.0363901
365	C	0.0319744	0.0310607	0.0185082	0.038373	0	0	0.0317931	0.0520888	0.027027	0.0241604	0.0103616	0	0.0514227	0.0376932
369	C	0	0.0346801	0.0201005	0.0216076	0.0185598	0.0250063	0	0.0105441	0.018401	0.0244559	0.0526427	0.025533	0.0183993	0.0506393
379	C	0.0227376	0	0.0794702	0	0	0	0.0240269	0.0119076	0.031463	0	0.0477441	0.0144634	0.0683216	0.0139958
381	C	0	0.0460405	0	0.0273075	0	0	0.0236546	0.0235018	0.0208138	0.0396616	0.070497	0.0143184	0	0.0415167
382	C	0.0227428	0.0232126	0.053749	0.0548998	0	0	0.0118413	0.0468823	0.0104254	0.026455	0.0352444	0.0430046	0	0.041534
386	C	0.049838	0.026455	0.0959386	0.0613309	0	0	0.075959	0.0755287	0.0679964	0.0419463	0.0635405	0.0314515	0.0504668	0.0735835
387	C	0.0499376	0.0265182	0	0.123229	0.0580215	0	0.0502513	0.0498629	0.0223914	0.0138485	0.0377311	0.015456	0.0249626	0.0434279
390	C	0.0506971	0.0270929	0	0	0	0.0792079	0.0127926	0.0254453	0.0347987	0.084246	0	0.0157085	0.0506457	0
391	C	0.0255885	0.0544366	0.0330688	0.0317259	0.0301932	0	0.0523149	0.0784109	0.0712589	0	0.0263748	0	0.0765306	0.0148588
399	C	0	0.15121	0.0297265	0.0298686	0.0552944	0	0.0492672	0.0613271	0.0881057	0.068334	0.0375375	0.0297	0.0956938	0.0428633
400	C	0.0248077	0	0.0614251	0.0307598	0.0282486	0.110457	0.0507421	0.0126151	0.0341142	0.0420109	0.0388601	0.045427	0.0739463	0.0290698
402	C	0.0752445	0.0522603	0.0313087	0.0935162	0.115141	0.113852	0.192901	0.128041	0.253749	0.0708416	0.236128	0.0614723	0.0757384	0.0879894
409	C	0.0529241	0.187919	0.131492	0.0648719	0.0572738	0.148588	0.268926	0.41125	0.417793	0.302943	0.371543	0.328299	0.207954	0.126084
417	C	0.116163	0	0.0200844	0	0.0522011	0.0213812	0.0815281	0.0230627	0.0450755	0.0626096	0.0506329	0.0428021	0.0324044	0.0399414
424	C	0.0104778	0.0306529	0.0251731	0.0138236	0	0	0.0311429	0.0314762	0.0209952	0.0113973	0.0119204	0	0.0234549	0.0377929
429	C	0.0308198	0.0498008	0.0368008	0.0135465	0.0325698	0	0.0311042	0.0525431	0.0104199	0.0341452	0.011956	0	0.045106	0.0126135
430	C	0.0302358	0.00975324	0.0119847	0.0395622	0.053339	0.0133174	0.0917057	0.0414422	0.041013	0.067484	0.0352941	0	0	0.0616447
441	C	0.00997805	0.0381898	0.0227609	0.026448	0.0428036	0	0.104417	0.0741761	0.0749705	0.0456777	0.0258598	0	0.0344076	0.079639
442	C	0.00988631	0.00944465	0.0225048	0.0261575	0.0105977	0	0.0606919	0.0308008	0.0208551	0.0111025	0.0251921	0.0142389	0.0452899	0.0385307
450	C	0.0274625	0.00870928	0.0622342	0.024108	0.0393546	0.0245942	0.0442243	0.0455622	0.103891	0.078125	0.0112549	0.0126855	0.0315225	0.0457247
453	C	0.0821018	0.0261643	0.062422	0.0480885	0.0395531	0	0.0436491	0.0997642	0.111993	0.0289436	0.0334411	0	0.0104987	0.0449287
456	C	0.0462663	0.0354799	0.0213721	0.0366569	0	0.0125016	0.0264271	0.0277187	0.0191828	0.019497	0.0113792	0	0	0.0337192
457	C	0.0278009	0.00889047	0	0.0245008	0	0.0125329	0	0.0184638	0.00961446	0.0290726	0.0113482	0	0.0213927	0.0673401
459	C	0.0276778	0.026617	0.0106712	0.0366659	0	0	0	0.0180734	0.00943663	0.0286096	0	0.0124906	0.0212202	0.021966
462	C	0.055371	0.0177557	0	0.02442	0.0100291	0	0	0.0616251	0.00931099	0	0.010846	0.0247127	0.053056	0.0433182
463	C	0.0184809	0.0266477	0.0106963	0.0611396	0.0100381	0.0124719	0.166072	0.131211	0.18474	0.203496	0.171858	0.171906	0.0212067	0.0967014
472	C	0.114727	0.040032	0.0360534	0.0548321	0.0457614	0.113701	0.0718068	0.0864387	0.0519534	0.060551	0.0475229	0.0272072	0.0751691	0.0600889
475	C	0.142248	0.0316456	0.0506073	0.0857143	0.12207	0.137091	0.207637	0.19378	0.240485	0.120289	0.107424	0.164046	0.121622	0.193681
479	C	0.123778	0.0956938	0.0578285	0.112179	0.112486	0.106345	0.195768	0.200763	0.247845	0.279099	0.246002	0.130227	0.154823	0.127812
481	C	0.0662603	0.0640123	0.15387	0.135823	0.119403	0.165411	0.183756	0.199084	0.239683	0.100735	0.166528	0.137893	0.128742	0.110769
483	C	0.0848608	0.247566	0.0593472	0.106406	0.0382995	0.0918907	0.156986	0.127199	0.0998668	0.0960615	0.0635243	0.0147167	0.0574933	0.0649604
490	C	0.166451	0.0910747	0.132217	0.0460723	0.0642398	0.0755858	0.0589565	0.021077	0.0779076	0.0430015	0.0379603	0.0145159	0.165017	0.0129249
491	C	0.0913743	0.0362845	0.0219974	0.045683	0.0426803	0.0498256	0.0190603	0.0408122	0.0107285	0.0312761	0	0	0.0205804	0.0371701
492	C	0.0555247	0.0367444	0.0446628	0.0460617	0.0865239	0	0.066928	0.0102438	0.0107654	0.010469	0	0.0138619	0.0208855	0.037207
494	C	0.0404367	0.0817661	0.103252	0.101343	0.170358	0.0260349	0.0482486	0.0309949	0.021645	0.0319217	0.01207	0.0541052	0.0422476	0.0609088
496	C	0.19084	0.215475	0.297177	0.167224	0.114338	0.170275	0.0470943	0.0508285	0.0843882	0.0309917	0.0809998	0.0774393	0.218081	0.0465387
497	C	0.0564016	0.0386175	0.0736558	0.0707047	0.0675219	0.0480077	0.0282832	0.0203231	0.0209908	0.0412414	0.0115048	0.0512426	0.0391007	0.0230974
498	C	0.0934754	0.0386026	0.0490316	0.0234962	0.0224417	0.0239923	0.00947688	0.0305686	0	0.0206676	0.0115128	0.0128156	0.0585252	0.034618
501	C	0	0.0382409	0.0737101	0.0922297	0.0666519	0.0236128	0.0579374	0.0208899	0.0641026	0.0105955	0.0351165	0.0258031	0.0960799	0.0464145
502	C	0.0919794	0.0763068	0.0243427	0.0229305	0.043956	0.0935235	0.0791452	0.0429646	0.0435825	0.0217273	0.0119717	0.0132275	0.112867	0.0838826
503	C	0.164231	0.186726	0.0644192	0.12333	0.135528	0.0199601	0.0364631	0.0696656	0.0602531	0.0600601	0.0879798	0.0366077	0.124786	0.0222891
517	C	0.0260213	0.0528821	0.0605785	0.0475587	0.014043	0.0534283	0.143021	0.0601202	0.0473575	0.122312	0.0430756	0	0.0261131	0
527	C	0.0444346	0.0656599	0.0730105	0.0538866	0.0462642	0.0720254	0.0494413	0.0104679	0.0195503	0.0419507	0	0.0270453	0.0327332	0.0378167
532	C	0.030785	0.030036	0	0.0124533	0.0630252	0	0.0291177	0.041365	0.00959969	0.0618429	0.0329815	0	0.0210128	0.0501567
537	C	0.0319217	0.0619515	0.0329779	0.0921416	0.0317628	0	0.0409123	0.0980392	0.0200501	0	0	0.0554708	0.0109445	0.0521105
539	C	0.0538793	0.0207771	0	0.0132943	0.0319353	0	0.0207814	0.0111445	0	0	0	0	0.0329164	0
543	C	0.0318336	0.05134	0.0438068	0.0392773	0.0319966	0.11559	0.0829445	0.0113109	0.0539142	0.0108944	0.0475455	0.0583771	0	0.0266773
548	C	0.0210305	0	0.0108213	0.0258699	0.0210793	0.0144196	0	0.0113585	0	0	0	0.0147732	0.0108319	0
549	C	0.0632711	0.0813421	0.0216567	0.0648593	0.0105619	0.0144739	0.0314597	0	0.0109481	0.0109625	0	0	0	0.0411692
550	C	0.073723	0.0608088	0.021561	0.02589	0.0105252	0	0.0311915	0.0224871	0.0214869	0.0216497	0	0.0146263	0.0432432	0
567	C	0.0399162	0.0192363	0.0416406	0.0368369	0.0101605	0	0.0288517	0.0212089	0.0323415	0	0.0219925	0	0.0329489	0.0129803
568	C	0.0898921	0.0192382	0	0.0490256	0.0203417	0.0143123	0.0482346	0.0532708	0.0324921	0.0295916	0.0330579	0.0142491	0.0438885	0.0517732
570	C	0.0198787	0.0576424	0	0.0121832	0.0101368	0	0.0971723	0.0756511	0.0774336	0.0397338	0.0110988	0.0143823	0.0332926	0.0652997
578	C	0.0781424	0.011236	0	0.0139024	0.0244888	0	0	0	0	0.00940026	0	0	0	0
579	C	0.0334113	0.022414	0.0252493	0.0553021	0.0121477	0.016581	0	0.0102533	0	0.00937734	0	0	0.0255787	0
585	C	0.0234055	0.0236967	0.0135227	0.014453	0.038501	0	0.0889759	0.0597788	0.0414207	0.0455249	0.0511195	0.0240558	0.0137665	0.0448732
592	C	0	0.0136314	0	0	0	0.0202552	0	0.0102785	0.0106712	0.0189143	0	0.0121625	0.0295029	0.0113804
593	C	0	0.0138812	0.0160875	0	0.0152323	0.0204708	0	0.0103125	0.0213904	0	0	0	0.0296472	0.0114181
603	C	0.0136836	0.0541785	0	0.0493583	0.0141563	0.0179115	0.0658452	0.0412584	0.050844	0.0292769	0.0322269	0	0.026936	0.0229253
608	C	0.0375094	0.0485378	0.0285919	0.0455789	0.0252175	0.0633212	0.0443734	0.0194761	0.0481325	0.0278035	0.100422	0	0.0507872	0.0219394
614	C	0.0487626	0.0352319	0.0707214	0.0148017	0.10592	0.0304044	0.048605	0.0649491	0.0106394	0.0504694	0.0329345	0.0118526	0.0511902	0.0347222
615	C	0.0595238	0.0456569	0.0276319	0	0.0456621	0.0737028	0.019442	0.0431779	0.0211015	0.0303092	0.0329164	0.0480077	0.0501316	0.0349121
618	C	0.0654193	0.049597	0.029967	0.0468604	0	0.0307125	0.0591949	0.0645161	0.0524219	0.105831	0.0111857	0.023596	0.0398406	0.0588998
621	C	0.0898473	0.108972	0.0431779	0.076746	0.0230574	0.0585566	0.0289268	0.0624155	0.0804101	0.0522958	0.0433557	0.0231	0.0518538	0.058651
622	C	0.112909	0.0940734	0.0685965	0.0598086	0.0219732	0.0832062	0.104612	0.0715015	0.156082	0.0828758	0.084513	0.0223814	0.0723589	0.136986
624	C	0.0490737	0.0568053	0.0514933	0.0724533	0.0514086	0.0804613	0.167723	0.0990295	0.11106	0.17402	0.132127	0.0865333	0.138841	0.233307
632	C	0.034904	0.021126	0.0350713	0.083717	0.02792	0.00973047	0.0536193	0.0187477	0.0772333	0.0503728	0.0381098	0.00984834	0.0498795	0.0206761
633	C	0.055605	0.0401647	0.0222469	0	0	0.0283661	0.0350232	0.0458674	0.0168011	0.00989707	0	0.00974374	0.0322737	0.0410635
636	C	0.051717	0.0185202	0.0603258	0.0247924	0.0316181	0.0340426	0.096043	0.0701473	0.0462321	0.0658328	0.0708645	0.0207727	0.036914	0.0113688
638	C	0.029824	0.0360133	0.0196483	0.0823239	0.0693374	0.0250794	0.00976086	0.040729	0.028177	0.0223714	0.0102722	0	0.0579039	0
639	C	0.0292085	0.0443695	0.0291206	0.0461521	0	0	0.0289939	0.040347	0.0466331	0.110705	0.020377	0.0416406	0.0426439	0.0456777
645	C	0.0182866	0.0420168	0.0185443	0.0645995	0.0583942	0.0158894	0.0292085	0.0407955	0.0281083	0	0	0.0220604	0.034626	0.0354694
660	C	0.094162	0.095057	0.038208	0.0222222	0.0968126	0.0488639	0.0403429	0.0930521	0.0765697	0.0821307	0.0414852	0.0330106	0.101789	0.0980152
663	C	0.0411057	0.0474924	0.042092	0.0481986	0.0320513	0.017191	0.0741683	0.0434452	0.0402334	0.0250282	0.0647948	0.0225149	0.0618429	0.0126135
674	C	0.023546	0.044238	0.0238493	0.041006	0.0816993	0.0382592	0.0299431	0.01972	0.00945001	0.0240327	0.00988045	0	0.0166834	0.0246518
676	C	0.0240993	0.0227894	0.0607238	0.0419639	0.0185408	0.019687	0.0875231	0.0288934	0.0462107	0.0234962	0.0289017	0.0316957	0.0426439	0.0485025
687	C	0.114796	0.0485909	0.0266809	0.0151814	0.0100847	0	0.069533	0.0690131	0.0893356	0.06888	0.0445831	0.0484907	0.0378501	0.0426985
695	C	0.106781	0.0897577	0.0562177	0.140647	0.0553491	0.0290473	0.211228	0.11029	0.210107	0.16835	0.12685	0.123902	0.0711238	0.105152
699	C	0.0921942	0.0770787	0.0332816	0.123579	0.0393949	0.0191939	0.144412	0.120839	0.0898069	0.115577	0.0841397	0.100435	0.0616143	0.0391134
703	C	0.03848	0.0538117	0	0.0117813	0.0296934	0.0173205	0.0216967	0	0	0.0249128	0.0204562	0.0214915	0.00787402	0.0125235
707	C	0.0379147	0.0265064	0.0309821	0.0233046	0.0296406	0.0340397	0	0.0109938	0.0113289	0.0382604	0.0419727	0.0108956	0.0304391	0.0126727
708	C	0.00914913	0.0171174	0	0.0225912	0	0.0082291	0	0	0	0.0126358	0	0	0	0.025025
710	C	0.0444247	0.05846	0.0196444	0.0219202	0.0355948	0.0241643	0.0221288	0	0.0112372	0	0.0208247	0	0.0496032	0
711	C	0.00842531	0.00788395	0	0.0309598	0.00681338	0.00754432	0.0108613	0.0106451	0	0.0243605	0.0102249	0	0.026125	0.011989
713	C	0.0251088	0.0549106	0.0279746	0.0205233	0	0.00752389	0.0327189	0	0.0111235	0.024432	0	0.0106259	0.0325161	0.0361707
718	C	0.0250668	0.0156875	0	0.020429	0.0067944	0.00752502	0.0111173	0.0217108	0	0.0245459	0.0209996	0.0108873	0.0129216	0
722	C	0.034153	0.0080289	0.0382922	0.0313906	0.0418235	0	0	0.0115154	0	0	0	0.0240674	0.0197981	0
723	C	0.0342231	0	0.00958957	0.02096	0	0	0	0.0116009	0	0.0258331	0.0112829	0.0121124	0.0131917	0.0131562
725	C	0.0256805	0.0402674	0.0288489	0	0.0140321	0.00774773	0.0241196	0.0118385	0	0	0.011534	0	0.0198715	0
726	C	0.0170488	0.00803471	0.0191847	0	0.0140027	0.0155015	0.0847663	0	0.0252589	0.0516662	0	0	0	0
728	C	0.0257202	0.0162035	0.0193817	0.0419948	0.0282865	0.0313063	0	0.0261301	0.0136818	0.041534	0.0251162	0.0135263	0.0331257	0
729	C	0.0258576	0	0	0.010543	0	0.00789515	0	0	0	0.014245	0.0129584	0	0.0133209	0
730	C	0	0.00816327	0	0.0105686	0	0	0	0	0	0.01443	0	0.0141183	0.00667735	0.0147406
733	C	0.747047	0.542139	0.354261	0.158966	0.746215	0.828751	0.78303	0.591383	0.221272	0.25011	0.651997	0.880231	0.703612	0.736067
734	C	0.0264714	0.00835422	0.010014	0	0.00733138	0	0.0155135	0.0473335	0.0164447	0	0.0152045	0.0154083	0	0.0158253
735	C	0.0176414	0	0.0200622	0.03222	0.00734754	0	0	0	0	0.0156055	0.0306279	0.0307503	0.013488	0.0157978
736	C	0.026643	0.0168393	0	0.0431732	0	0	0	0	0.0528634	0.0319795	0	0.0159185	0.0135501	0
738	C	0.0358359	0.0255537	0.020452	0.0979006	0.0301318	0.0163332	0	0.0174064	0.0189825	0	0.0509857	0	0.0479583	0
739	C	0.0359421	0.0256235	0.0102638	0.0218126	0.00756659	0	0	0.0175963	0.0191975	0	0.034323	0.0168805	0.01374	0
740	C	0.0281373	0.00900657	0.0546986	0.0227144	0.0239981	0.0261256	0	0	0	0	0.0181851	0	0.036735	0
741	C	0.0658204	0	0.0109878	0.022818	0.0161121	0.0087382	0.0180995	0.0182448	0	0	0	0	0.0147438	0.0543183
745	C	0.019333	0	0.0114469	0.0352154	0.0336389	0.00913576	0	0.0190512	0	0.0356189	0	0	0.0230309	0
746	C	0.0388765	0.0188306	0.0115207	0.0472367	0.0169377	0.0184247	0.0382555	0.0193087	0.0639114	0	0.0190006	0	0.0387087	0.0943218
748	C	0.060889	0.0887574	0.0487448	0.0490557	0.044843	0.00980488	0	0.160675	0.155314	0.0730327	0.0793336	0.0824402	0.024888	0.0196271
750	C	0.0517491	0.0100735	0.0757576	0.113179	0.0650195	0.0301235	0.120482	0.144152	0.179372	0.110701	0.183673	0.0844416	0.0759686	0.0790826
753	C	0.116384	0.102564	0.096401	0.155569	0.0869781	0.0528611	0.0479157	0.120627	0.105402	0.110059	0.124969	0.231541	0.0751395	0.0722892
755	C	0.0645474	0	0.0605449	0.0791452	0.0488838	0.0322633	0.0799787	0.158983	0.0867804	0	0.111701	0.200631	0.0495111	0.131926
756	C	0.0715308	0.0356824	0.0224316	0.0662544	0.0727537	0.0687049	0.138007	0	0	0.0514139	0.0290107	0	0.0776096	0
757	C	0.0387372	0.0391696	0	0.097229	0	0	0.056899	0.0285307	0.211993	0.0795545	0	0.0932546	0.0277546	0.0275634
758	C	0.0203666	0.0819001	0.33419	0.0767656	0.145985	0.0971062	0.0251509	0.0754148	0.0529381	0.0965018	0.105152	0.0292826	0.0847697	0.0786164
759	C	0.0880475	0.0661084	0.273823	0.0542741	0.35524	0.144092	0.122399	0.170857	0.286235	0.1396	0.180319	0.208147	0.0595859	0.184745
761	C	0.126807	0.153531	0.0933416	0.186104	0.254388	0.0511771	0.0471809	0.0462535	0.0735835	0.0457457	0.143164	0.0620732	0.0526039	0
766	C	0.0549149	0	0.0671141	0.168805	0.0271665	0.0259538	0	0.0216732	0	0.0214869	0	0	0.0364764	0.0271961
768	C	0.029967	0.0620732	0	0	0	0	0	0.0213812	0.0228258	0.020982	0	0.0309693	0.0387597	0.0807972
773	C	0	0.03803	0.0403551	0.0516929	0.0491803	0.0167673	0.0193498	0.0391619	0	0	0.0200441	0	0.0266028	0.074001
781	C	0.0291758	0	0.0139997	0.0186254	0.0110363	0	0.0302572	0	0.0322945	0.0162285	0	0.0172741	0.00947059	0.036049
782	C	0.0142939	0.0522671	0.0274763	0	0.0108401	0.0339866	0.0736269	0.0453378	0.0476039	0.0317058	0	0.0168237	0.0185753	0
783	C	0.108622	0.012458	0.0130412	0.0519031	0.020536	0.0429553	0.0565691	0.0289981	0.0152975	0.0458015	0	0.0160462	0.0799219	0.0337838
785	C	0	0.0115594	0.0242748	0.0956785	0.00951113	0.039805	0.0261917	0.080928	0.127932	0.0280662	0.0525003	0.0883132	0.0737524	0.0930088
790	C	0.0478985	0.0221141	0.058214	0.045565	0.00905469	0.027946	0	0	0.0265358	0.040016	0	0.013412	0.0464432	0.0143246
791	C	0.0118765	0.0219034	0.0462321	0.0750863	0.00897263	0.0277726	0.0242718	0.0123993	0.0393185	0.0263887	0.0242248	0.0265252	0	0.0425291
792	C	0.0342036	0.0105664	0	0.057929	0.0175701	0.00909753	0.0117883	0.0601468	0.012734	0.0766871	0.0470367	0.0774793	0.0225751	0.0413565
797	C	0.245636	0.211606	0.251452	0.222074	0.0740242	0.0510353	0.0614376	0.0311462	0.0338524	0.0906413	0.0103831	0.0113882	0.147456	0.0248447
803	C	0.0553535	0.0295486	0.0080186	0.04002	0.0125196	0.00669748	0.0292369	0.02003	0.0433698	0.0323206	0.00998602	0	0.0112152	0.0577901
824	C	0.0440141	0.0345232	0.0228833	0.0371851	0.0239909	0.0187606	0.196309	0.142741	0.259477	0.181449	0.210659	0.061684	0.0318928	0.219803
829	C	0.102266	0.0965251	0.131062	0.129366	0.118788	0.09995	0.0525762	0.109158	0.0359195	0.0803859	0.0339597	0.120588	0.096864	0.0666889
833	C	0.110865	0.0980043	0.140365	0.186328	0.141833	0.0687699	0.0327332	0.0908471	0.0731261	0.0236827	0.0817471	0.0347826	0.10929	0.0463124
834	C	0.0374322	0.063314	0.0711816	0.0589553	0.031931	0.0606954	0.108861	0.0907132	0.0969344	0.0473317	0.0466364	0.104457	0.0293427	0.103998
835	C	0.0559963	0.0993138	0.0508854	0.0586235	0.0719367	0.0517241	0.0859845	0.0559222	0.166806	0.0700935	0.0576103	0.0800366	0.0880153	0.0682283
839	C	0.0533732	0.0422297	0.121139	0.0941746	0.0488091	0.0317024	0.0245098	0.0256082	0.0544144	0.0924581	0.0273299	0.0419639	0.0726282	0.0135172
840	C	0.0314729	0.0310784	0.0240385	0.0530715	0.0290135	0.0314762	0.0361969	0.0880392	0.0397404	0.0391338	0.0675037	0.055371	0.080848	0.0531208
842	C	0.0625195	0.0412669	0.0721414	0.0922874	0.0774893	0.0104406	0.0955909	0.148644	0.0389257	0.115548	0.080732	0.0690894	0.098637	0.143885
843	C	0.0211037	0.114943	0.0491159	0.0806994	0.0991572	0.0960717	0.0710395	0.0860162	0.101859	0.101924	0.132873	0.153075	0.082282	0.065368
850	C	0.0779684	0.0439947	0.0650364	0.0429676	0.0532368	0.0352154	0.0765697	0.0666933	0.0963922	0.0274952	0.0584027	0.046875	0.153249	0.0724848
851	C	0.0876232	0.0434877	0.0638162	0.0707314	0.115619	0.0924962	0.111497	0.116611	0.108167	0.0806018	0.1287	0.0760919	0.131379	0.127569
853	C	0.0559222	0.0111161	0.0258632	0.0724008	0.0957549	0.0700117	0.0505753	0.159088	0.235294	0.24688	0.175644	0.169753	0.0931099	0.0864678
856	C	0.0903206	0.121803	0.148893	0.14014	0.127004	0.0815661	0.0573723	0.0603682	0.0152765	0.0926355	0.0334616	0.0713521	0.143678	0.0960769
876	C	0.0493036	0.0353982	0.0139684	0.0169119	0.013986	0.0315507	0.0489416	0.0513677	0.0129735	0.0539593	0	0.086793	0.0130822	0.0538213
877	C	0.0596232	0.0227066	0.0266773	0.0821693	0.0270307	0.0454477	0.0943619	0.186962	0.183756	0.026096	0.0687663	0.201157	0.111455	0.217549
879	C	0.011885	0.0793111	0.0399467	0.032911	0.0269505	0.0302297	0.0234632	0	0.0242131	0.0520969	0	0.0124938	0.123793	0.0602555
884	C	0.06182	0.0353899	0	0.0342231	0	0.0159134	0.0370416	0.0131165	0	0	0.0141363	0	0.0382897	0.0251826
900	C	0.0460936	0.0111235	0.0396668	0	0.038202	0.0144907	0.0783699	0.17507	0.0810748	0.1213	0.0893313	0.0457038	0.023872	0.0555494
905	C	0.0974303	0.0236128	0.0565131	0.0499584	0.0137382	0	0.0462054	0.0599161	0.0361751	0.0379603	0.0786988	0.0348594	0.0900553	0.0226629
911	C	0.0400695	0.0256049	0.04649	0.0727802	0.0306607	0	0.0443853	0.0681973	0.0335495	0.0489057	0.0752729	0.0229358	0.0428878	0.0783173
912	C	0.0271481	0.0260518	0.0316156	0.0369891	0	0.0370989	0.0859383	0.0548065	0.0752931	0.0599449	0.036523	0.0336776	0.115808	0.0656886
927	C	0.176523	0.250292	0.103563	0.188368	0.124352	0.182108	0.14629	0.114061	0.180126	0.243337	0.175644	0.16517	0.115009	0.134436
930	C	0.388487	0.453705	0.226571	0.567666	0.18454	0.424012	0.389416	0.277447	0.198732	0.321936	0.324894	0.27281	0.26475	0.272755
931	C	0.132341	0.11127	0.133613	0.149349	0.190876	0.200441	0.154232	0.134422	0.13619	0.181663	0.182599	0.28788	0.170882	0.162711
937	C	0.017316	0.034002	0.0400721	0.107158	0.0192827	0	0.00995818	0.0194685	0	0.0330287	0.0435587	0.0108295	0.0502934	0
941	C	0.0641128	0.0312989	0	0	0	0	0	0	0	0.0321027	0	0.0106247	0	0.030678
948	C	0.155653	0.163755	0.139125	0.223329	0.202303	0.190235	0.290289	0.218122	0.173853	0.144003	0.254712	0.28464	0.204866	0.253017
950	C	0.131043	0.0279096	0.015647	0.0885426	0.0804894	0.14876	0.0666794	0.119937	0.0792114	0.0419859	0.103605	0.0514562	0.143998	0.0197122
951	C	0.058072	0.0557414	0.0155135	0.0176585	0.0325098	0	0.0935804	0.0635266	0.0941458	0.103348	0.0508906	0.0410804	0.0518739	0.0488138
953	C	0.0809323	0.122193	0.0331345	0.156525	0.0737735	0	0.0480815	0.0185237	0.077821	0.0747783	0.0415973	0	0.0408775	0.0395101
967	C	0.050163	0	0.0255265	0.0153586	0.0441761	0.0279369	0.00837521	0.0164366	0	0.0185219	0.00924129	0	0.028238	0.0437713
973	C	0.0347303	0.0109397	0.0232045	0.0560067	0.0133583	0.0129685	0.025385	0.0165248	0.0153988	0.0463435	0.00923191	0	0.0177983	0.0173355
974	C	0.118026	0.101885	0.0870606	0.0779626	0.0374953	0.0123839	0.0823452	0.0562204	0.0591979	0.0271223	0.0357622	0.0178635	0.0430219	0.0339184
977	C	0.0738085	0.0597491	0.0212925	0.0635243	0	0	0.0411286	0.00801989	0.0295792	0.0180522	0.00890631	0.00912742	0.0169362	0.0172161
979	C	0.0102072	0.00963484	0	0.0366838	0	0	0.024266	0.0158629	0.0145201	0.0177132	0.0264457	0	0.0165975	0
984	C	0.0260394	0.00828226	0.0366636	0.0739958	0	0	0.0293902	0.044069	0.0473421	0.0081626	0.0328677	0.0683235	0.037183	0.0318827
988	C	0.0864603	0.066346	0.0276957	0.0425215	0.0100412	0.0309885	0.0519134	0.0448397	0.0411156	0.0498173	0	0.0260575	0.0666519	0.0403649
989	C	0.0523469	0.0669568	0.0743564	0.0749304	0.0707571	0.0625913	0.0822491	0.0452148	0.0757941	0.117371	0.0592016	0.035097	0.074549	0.040783
994	C	0.0274826	0.0178971	0	0.0789444	0.0109697	0	0.0075792	0.0153022	0.0354007	0.0168478	0.0175269	0	0.00802311	0.00840407
1000	C	0.0182299	0	0.030494	0.0336323	0	0	0.0274895	0.0207139	0.012846	0.0152509	0	0	0.015722	0.0220864
1006	C	0.0522239	0.00849907	0.0294146	0.0648999	0.0315391	0.0108202	0.0195899	0.0263106	0.0303693	0.00727749	0.00744158	0	0.00777242	0.0140825
1007	C	0.0252292	0.0248324	0.0191498	0.0419771	0	0	0.0255542	0.019274	0.0059011	0.0285022	0.0217881	0.02992	0.0380344	0.00686389
1019	C	0.0174019	0.0259448	0.020145	0.0439802	0	0.0110072	0.0124239	0.0127267	0.00596694	0.00699007	0	0.00702988	0.0324097	0.0130438
1026	C	0.0782881	0.0604491	0.0201796	0.0438548	0	0.0111086	0.031348	0.00637024	0.0361576	0.0210674	0.0213265	0.0210733	0.0250815	0.0523252
1032	C	0.0376187	0.0563751	0.0224593	0	0	0	0.0397009	0.0205381	0.0065591	0.0150682	0.0308475	0	0.028006	0.0284333
1039	C	0.0353201	0.0705716	0.0416103	0.124717	0.109517	0.105584	0.168405	0.129111	0.152712	0.200119	0.159272	0.142343	0.139082	0.188877
1047	C	0.0527148	0.0604169	0.011422	0.0268528	0.0384074	0.026907	0.035256	0.00733353	0.0357756	0.00807689	0.00808342	0.0238209	0.068715	0.0226569
1053	C	0.0606367	0.058451	0.044608	0.0517665	0.0366748	0	0.0140766	0.0146338	0.0144865	0.0162193	0	0.0077688	0.0189934	0.00749625
1057	C	0.0104026	0	0	0.0533547	0.0125549	0	0.0302138	0.00791264	0.0157953	0.00883314	0	0.0167238	0.0194288	0.0244439
1063	C	0.0507511	0.0098561	0.0114679	0.0385902	0.0488878	0	0.0549063	0.0249128	0.0322087	0.0278577	0	0.0277752	0.0094509	0.0268025
1064	C	0.0401808	0.00974374	0.0683216	0.0381631	0.0364122	0.0127698	0.0545852	0.0741473	0.0800576	0.0184689	0.150305	0.0644271	0.0468691	0.106952
1067	C	0.00982704	0.0381207	0.0337382	0.0124039	0.0361795	0.0128008	0.0469447	0.0747136	0.130155	0.0459982	0.0284927	0.0186359	0.00938791	0.0629893
1074	C	0.0718068	0.0262009	0.0205973	0.0338066	0.022141	0.0235377	0.12359	0.171457	0.237079	0.134831	0.223964	0.111121	0.0607744	0.105643
1075	C	0.0442948	0.0258353	0	0.022242	0	0	0.136612	0.0722717	0.1009	0.0617012	0.0732265	0.0827738	0.0513567	0.0699301
1078	C	0.0360848	0.0703977	0.0313808	0.034087	0.0222792	0	0.0323651	0.0768771	0.132516	0.113293	0.0784775	0.0780259	0.0352206	0.121655
1079	C	0.0188519	0.0184315	0.0219998	0.0951701	0.0349977	0	0.0874355	0.0366905	0.0444998	0.0308261	0.031837	0.0855523	0.0375164	0.0511614
1085	C	0.0528867	0.0172102	0.0206825	0.0220556	0.0536999	0.0702165	0.0241293	0.0255406	0.0330961	0.0285009	0	0	0.0623275	0.0282859
1090	C	0.0859845	0.0930925	0.0896459	0.143868	0.128791	0.102551	0.145635	0.109609	0.131973	0.0901262	0.0852242	0.0526815	0.100381	0.0494218
1091	C	0.04823	0.0843645	0.0452233	0.0241633	0.0590667	0.0257632	0.0595745	0.0728465	0.0787539	0.0696656	0.0316656	0.0417145	0.0707857	0.0388387
1094	C	0.0751234	0.0626566	0.0637186	0.0401606	0.091623	0.0866802	0.161674	0.181032	0.104603	0.098189	0.197812	0.0921659	0.0782123	0.042163
1095	C	0.0477441	0.0921022	0.0283849	0.0732386	0.0140568	0.0915053	0.029274	0.0934191	0.0875998	0.15639	0.0835123	0.0821596	0.0722804	0.0743258
1098	C	0.0499688	0.0241604	0.0298329	0.0308071	0.0146671	0.0160256	0.0909918	0.0963701	0.0799361	0.115433	0.0864411	0.073269	0.0509424	0.0657246
1103	C	0.0690036	0.053843	0.118423	0.0847458	0.0477631	0.0177368	0.011029	0.0818235	0.0537981	0.0250532	0.0670961	0.0669792	0.0712251	0.0952041
1106	C	0.0397298	0.0128833	0.031746	0.0648929	0.0450721	0	0.0634249	0.101363	0.0412286	0.0602627	0.02575	0.0127845	0.0266383	0.0682516
1109	C	0.0406725	0	0.0161708	0.0336417	0.0154512	0	0	0.034638	0.0213197	0	0.0264585	0	0.0268348	0.0349813
1116	C	0.0566332	0.0280269	0	0.0354925	0.016581	0	0.0236855	0.025047	0.0228467	0	0	0	0.0555787	0
1117	C	0.05437	0.0803428	0.046875	0	0.0637349	0.0340774	0.0354484	0.0371932	0.0113327	0.0132153	0.0139684	0.0426197	0.0512492	0
1118	C	0.0679348	0.0401714	0.0777726	0	0.048	0.01703	0.071977	0.0125676	0.0115969	0.0404204	0.0142106	0	0.0128469	0.0391952
1123	C	0.0578787	0.0569476	0.0163961	0.0370576	0.0339041	0.0351803	0.0909682	0.0836004	0.0794702	0.0437509	0.0156593	0.0449371	0.0545033	0.0134844
1124	C	0.0582496	0.0143885	0.0490757	0.0185254	0.0336984	0.0340252	0.0130702	0.0423191	0.0668449	0	0.0157679	0.0451603	0.0270563	0.026936
1125	C	0.131272	0.129664	0.0645265	0.0556277	0.0166639	0.130976	0.124332	0.0675128	0.0764234	0.0570695	0.0755629	0.130397	0.105097	0.0904743
1127	C	0.136529	0.0748951	0.0667	0.0580833	0.0677966	0.0673514	0.125298	0.121836	0.153139	0.100835	0.0903478	0.0442282	0.0541638	0.0525417
1128	C	0.0917852	0.0602954	0.0834864	0.0977708	0.118584	0.117568	0.0474327	0.0895026	0.0840437	0.096101	0.0997577	0.081114	0.0939976	0.0491642
1132	C	0	0.0164042	0.018018	0.0635728	0.0361925	0.053802	0.0341219	0.037037	0.0348716	0	0.0137419	0	0.0144697	0
1135	C	0.0527241	0.0172087	0.0937734	0.13369	0.114003	0.0371126	0.0238692	0.0518739	0.0121669	0.0420227	0	0.0134066	0.074638	0.0372024
1138	C	0.0679002	0.0332834	0.0544267	0.129366	0.0366838	0.0179888	0.0997009	0.0842967	0.067446	0.0263296	0.0815107	0.062027	0.0288559	0.0685714
1139	C	0.0624512	0.106919	0.134138	0.0798563	0.0170097	0.0473037	0.020536	0.0778556	0.07431	0.0361751	0.0502323	0.0111782	0.125739	0.0721724
1146	C	0.0310945	0.0305577	0.0335965	0	0	0.0318573	0.0103875	0.0791408	0.0429185	0	0.0127992	0.0116036	0.0617589	0.0315391
1147	C	0.0283046	0.0277778	0	0.018457	0.0316756	0.0304553	0.138628	0.108026	0.13459	0.0931532	0.0857843	0.0673325	0.0470201	0.102291
1153	C	0.03386	0.0110387	0	0.0146778	0.0128436	0.012865	0.0183167	0	0	0	0	0	0.00998801	0
1162	C	0.0396589	0.0961446	0.0226501	0.0518068	0.0578235	0.0351865	0.0177054	0.00964972	0.0682727	0.0103072	0.0555494	0.0204876	0.0644449	0.0476644
1163	C	0.0495148	0.0769379	0.0453463	0.0517197	0.0347987	0.0818235	0.0528588	0.0479846	0.0971062	0.0411184	0.0331638	0.0509424	0.13816	0.0189825
1180	C	0.03688	0.00909091	0	0.0838826	0.0112562	0	0.33006	0.263574	0.34599	0.232148	0.259121	0.0408288	0.0291262	0.138581
1185	C	0.0366099	0.0180261	0.044082	0.0240183	0.0337041	0.0235655	0.0321053	0	0.0271174	0.0183352	0.020749	0.0203066	0.0194989	0.0550055
1191	C	0.0847777	0.0555864	0.0688784	0.086784	0.0578102	0	0.106421	0.0976372	0.0306717	0.0401405	0	0	0.0406876	0
1205	C	0.174761	0.216411	0.121172	0.157595	0.17627	0.110294	0.111826	0.143929	0.119813	0.0838047	0.0720115	0.142709	0.174127	0.138344
1213	C	0.0929368	0.0198906	0.0352941	0.0549375	0.0574581	0.0358895	0.0327869	0.0603355	0.0373181	0.0361141	0.0139919	0.0297708	0.0429599	0.0386997
1215	C	0.114001	0.149432	0.0814427	0.083114	0.137315	0.0476985	0.0560664	0.135168	0.114054	0.16002	0.128884	0.123001	0.0427579	0.0790306
1216	C	0.038208	0.0733878	0.0529942	0.128551	0.0634921	0.0223589	0.0449843	0.0497451	0.0383044	0.0619042	0.0870196	0.0154392	0.0102859	0.0662866
1218	C	0.0800427	0.067929	0.0298567	0.0360924	0.0595533	0.0210571	0.0110436	0.0366928	0.0126646	0.0121521	0.0424448	0	0.0291602	0.01295
1219	C	0.0253721	0.0564061	0.0188982	0.0228676	0.0561956	0.0195963	0.0213812	0	0.0245459	0.0470976	0	0.0143719	0.0456704	0
1230	C	0.0158078	0.0225564	0.00909256	0	0.026295	0.00938703	0.0113908	0.0254097	0.0138217	0.0122399	0	0.0295727	0.0174368	0
1231	C	0.00781494	0.022275	0.0270003	0.0316522	0	0.00925497	0.0451213	0	0	0.01213	0	0	0.0343968	0
1234	C	0.0155087	0.0294464	0.0445673	0.0624805	0.0170547	0.00920471	0.0224643	0	0.01374	0.0483384	0	0	0.0597729	0.0258598
1237	C	0.0077918	0.0221664	0.0179469	0.0208355	0.00848896	0.0274198	0.0363108	0.0134862	0.0459207	0.0256871	0.0150286	0	0.0255864	0.0272851
1247	C	0.115712	0.102322	0.113475	0.121012	0.0456204	0.00980873	0.115959	0.0968836	0.132676	0.209612	0.0350079	0	0.0460363	0.0154369
1249	C	0.0248653	0.0394851	0.0189952	0.0441452	0.018352	0.00991572	0.0749064	0.167252	0.180288	0.123362	0.0181488	0	0.0280846	0.0948767
1252	C	0.06628	0.00790764	0.0189717	0.0109987	0	0.00991768	0	0.05077	0.0202922	0	0.0362647	0	0.028061	0
1254	C	0.0164123	0.00784252	0.0281373	0.0109027	0.0365831	0.0198886	0.0888231	0.115037	0.0780031	0.0755401	0.105024	0.033151	0.0373972	0.0614723
1261	C	0.0555159	0.0534555	0.0462706	0.0534817	0.0275103	0.0100827	0.0397878	0.0739536	0.0169377	0.0408886	0.116516	0.0146606	0.068715	0.0566974
1262	C	0.0459207	0.0146897	0.026848	0.0206676	0.0179067	0.0296121	0	0.013563	0.030955	0.0127291	0.0132223	0.0419229	0.00947239	0.0815883
1264	C	0	0.0146843	0	0.0206932	0.0269542	0.0199641	0.0244708	0.0403009	0.0763359	0.0380518	0.0391338	0.0140311	0.0761035	0.0406835
1266	C	0.0632111	0.0533618	0.0555761	0.0751395	0.0564812	0.0210349	0.0264236	0.072223	0.082713	0.12285	0.168753	0.120755	0.07	0.0885609
1267	C	0.0472367	0.037733	0.0922679	0.0641986	0.00942951	0.0215564	0.0267308	0.0145159	0	0.013776	0.0556251	0.0764877	0.0519211	0.0757691
1268	C	0.0707547	0.0301455	0.0461212	0.0214179	0.0283126	0.0433604	0.0264725	0.0287604	0.0649351	0	0.0277008	0.0757232	0.0937891	0.0149768
1271	C	0.148441	0.0868535	0.106952	0.12428	0.120724	0.102471	0.0251953	0.0138773	0.124417	0.0669523	0.0541712	0.0579794	0.138993	0.04265
1272	C	0.143763	0.080952	0.189526	0.0691882	0.144898	0.0708968	0.124922	0.0550888	0.121803	0.04	0.0266809	0.12837	0.142045	0.0707114
1273	C	0.0938006	0.00821153	0.089937	0.0927214	0.0309534	0.0844085	0.0238152	0.0264131	0.0285796	0.0257433	0.012486	0.0270015	0.0986734	0.0407886
1277	C	0.0844773	0.221595	0.183329	0.084686	0.147729	0.11422	0.0556607	0.0366166	0.0519818	0.0360447	0.023092	0.0494193	0.124797	0.0640615
1279	C	0.0842764	0.160661	0.095511	0.141978	0.0832062	0.0838082	0.0555617	0.0725602	0.0128353	0.0834227	0.0351617	0.0637186	0.0715103	0.0648593
1283	C	0.0371103	0.0475229	0.0688326	0.0808146	0.0559362	0.05065	0.0759384	0.0822562	0.0737554	0.0463607	0.0335158	0.0725076	0.115174	0.0890812
1292	C	0.0216544	0.0102041	0.0111657	0.0562905	0.0235405	0	0.010305	0.0225403	0.0348068	0.0332152	0	0.022477	0	0.0124363
1303	C	0.016276	0.0152207	0.0337638	0.0423415	0.0342936	0	0.0396118	0.010812	0	0.021322	0	0	0.0182515	0.0118737
1305	C	0.0237229	0.0221926	0.0163988	0.0307629	0.0413052	0	0.0293657	0	0.0550116	0.052532	0.0394516	0.0202265	0.0179099	0.0117247
1309	C	0.0150308	0.0212134	0.00786658	0.00976276	0.0312647	0.00903342	0.0192178	0.031237	0.0107469	0.0308515	0.00966464	0.00987849	0.00874355	0.0341725
1311	C	0.0525841	0.049442	0.0314342	0.0390587	0.031211	0.00901469	0.00960246	0	0	0.0102912	0.0096581	0.00987069	0.0436796	0.0113882
1316	C	0.023339	0.0219459	0.00815328	0	0.0240134	0.0272579	0.0295043	0.010725	0.0110156	0.0105541	0	0	0.0444523	0.0118793
1317	C	0.0309526	0.00726111	0.024264	0.0500601	0.015829	0.00895175	0.0193199	0.0211439	0.0216427	0.0312858	0.029759	0	0.0613604	0.011798
1331	C	0.0545182	0.0507582	0.0422952	0.0526223	0.0614209	0.0310438	0.0292797	0.041013	0.05204	0.0839542	0.0382629	0.0304785	0.0693107	0.0130907
1336	C	0.0712124	0.0328803	0.043573	0.0303214	0.0482189	0.0262674	0.0181274	0.130402	0.110345	0.0483559	0.0497512	0.0087558	0.0405022	0.0361664
1337	C	0.071187	0.0603103	0.062348	0.113852	0.0482771	0.0132127	0.183083	0.244131	0.239985	0.155854	0.0743679	0.035483	0.574713	0.257985
1341	C	0.0354191	0.0272717	0.0374579	0.0382321	0.0182072	0.01953	0.0280348	0.019279	0.0185805	0.0200381	0.0247872	0	0.026824	0.0121153
1355	C	0.0457576	0.0541647	0.0271463	0.0419533	0.0402712	0.0510912	0.0355051	0.0622388	0.0249232	0.0381643	0.0392218	0.0691264	0.0352088	0.0467017
1363	C	0.0543052	0.0274348	0.0122309	0.0391236	0.0318005	0.0350484	0	0	0.0153092	0.0451916	0.00737518	0.0164096	0.0258465	0.0110644
1373	C	0.00578135	0.00528346	0.0294291	0.0374167	0.0122287	0	0.0150399	0.00756659	0	0.041841	0	0.0374223	0.0296331	0.0397891
1374	C	0.0286189	0.0157233	0.0116904	0.0222436	0.00606024	0.0258967	0.0142308	0	0.0067331	0.0158856	0	0.0145921	0.0176595	0.0191186
1380	C	0.0454597	0.0368208	0.0235877	0.0518903	0.030773	0.00670331	0.0308499	0.0230929	0.0365444	0.0169779	0.00707564	0.0226227	0.0612445	0.0395844
1384	C	0.0647783	0.0604528	0.0806252	0.0385624	0.0322373	0.0278125	0.182815	0.168572	0.183863	0.112694	0.171975	0.207306	0.070086	0.0898957
1389	C	0.100658	0.050521	0.0216029	0.0605589	0.021725	0.0371416	0.0378415	0.0152416	0.0220572	0.0333973	0.0362083	0	0.083834	0.0270051
1391	C	0.0268043	0.0693175	0.0792051	0.0774927	0.036075	0.0374728	0.067527	0.0604869	0.0577993	0.0579087	0.0431903	0.0590188	0.0493444	0.0446628
1395	C	0.0576369	0.0207727	0.0319387	0.0941265	0.0238095	0.0178651	0.0662087	0.0750438	0.0403226	0.0367782	0.0413976	0.0259045	0.0404531	0.0494022
1399	C	0.0379853	0.0586166	0.00841468	0.0197025	0.0247852	0.0281928	0.0252695	0.0169578	0.03314	0.0186968	0	0.00893256	0.0170314	0.0304538
1403	C	0.0610407	0.0368216	0.0253464	0.0491787	0.0082672	0.00951746	0.0424448	0.00849257	0.025	0.0282672	0	0.00892379	0.0432713	0.0102187
1410	C	0.0760861	0.0883327	0.0254669	0.10814	0.0164406	0.0479386	0.0584307	0.0593774	0.107785	0.0463994	0.126572	0.0433313	0.0526732	0.0292426
1412	C	0.0388863	0.0604778	0.0615764	0.0605694	0.0767198	0.0691563	0.0773063	0.0439329	0.0517464	0.0664137	0.0347947	0.0529287	0.0543577	0.0491545
1415	C	0.111276	0.166991	0.142372	0.160158	0.191063	0.0633473	0.0194723	0.0592944	0.0292341	0.0215587	0.0292369	0.0401123	0.13089	0.0223989
1416	C	0.068326	0.0886525	0.140334	0.0918635	0.0448179	0.0640697	0.0292056	0.0993739	0.0387559	0.0541419	0.058508	0.080402	0.0850443	0.0448581
1417	C	0.110375	0.0611309	0.0610054	0.0541638	0.0345423	0.0777907	0.0494462	0.120458	0.0685468	0.0109565	0.0196599	0.0506586	0.0872274	0.0113999
1418	C	0.0915844	0.103756	0.0745619	0.0966317	0.0350508	0.105652	0.0297	0.0602833	0.0491159	0.0330178	0.0590261	0.0708072	0.100819	0.022818
1419	C	0.123495	0.199496	0.163955	0.153374	0.141409	0.0399574	0.0495933	0.0501605	0.0589333	0.0881446	0.0491787	0.0202265	0.201842	0.0910851
1423	C	0.0122805	0.0257136	0.015625	0.0322009	0.0133369	0.0149009	0.0498355	0.0201066	0.0294233	0.04363	0.0290782	0.0888713	0.0564653	0.0113058
1427	C	0.0120788	0.0380469	0.0919118	0.0157754	0.0259875	0.0291843	0.108225	0.108825	0.0954381	0.0420389	0.0284064	0.115707	0.069185	0.0221852
1430	C	0	0.0121996	0.0441176	0.0153681	0.0125219	0.0277932	0.00958589	0.0384135	0.0371161	0.0102239	0.0277085	0.0187652	0.0259538	0.0322442
1433	C	0.0591646	0.0367197	0.0145307	0	0.0253389	0.0282167	0.0297265	0.0292883	0.0567859	0.021126	0.0188147	0.0377074	0.0905914	0.0109349
1434	C	0.0473205	0.012161	0.0143369	0.106952	0.0503905	0.02849	0.0417188	0.0204186	0.0295683	0.03292	0.00973236	0.0193143	0.0907206	0.0677736
1435	C	0.0470976	0.0603427	0.0141643	0.045565	0.0250031	0.0283567	0.0103702	0.0607533	0.0391313	0.0218269	0.0193274	0	0.0257268	0.0226193
1436	C	0.0241838	0.061222	0.028547	0.0464396	0.0250815	0	0.0622407	0.0203417	0.00981547	0.0547046	0.00971251	0.02936	0.0757384	0.0113882
1437	C	0.0488222	0.111029	0.10043	0.0625782	0.0125644	0.0416031	0.083682	0.0307251	0.0790045	0.0219949	0.0195179	0.0195791	0.0366122	0.0567408
1440	C	0.295022	0.270903	0.169587	0.298039	0.0740832	0.0131891	0.0307535	0.0302054	0.0193274	0.0538387	0	0.0094509	0.0686106	0
1443	C	0	0.0486027	0.0414651	0.062054	0.0121065	0	0.0102333	0	0.0287908	0.0214961	0	0	0.0219346	0.0215448
1453	C	0.0302572	0.102339	0.0609942	0.150517	0.0276281	0.0282686	0.03463	0.033527	0.0105363	0.0236211	0.0103199	0.0104712	0.0583908	0.0124642
1460	C	0.0255951	0.0357185	0	0.0162866	0.0228833	0.0226501	0.0103734	0.0404449	0.019044	0	0	0.00977899	0.0385654	0
1464	C	0.0481232	0.0222643	0	0	0	0.0210682	0.0100402	0.0394789	0.00927816	0.0312989	0.00931012	0.0196657	0.0182749	0.0340406
1467	C	0.0224795	0.0522248	0.0329345	0.014518	0.020141	0.00997805	0	0	0	0.052499	0.00935804	0.0100462	0.0263366	0
1468	C	0	0.0302115	0.0106112	0.0278048	0	0.00973236	0.0200702	0.00982125	0.00925326	0	0	0	0.0172756	0.0116768
1470	C	0.0389067	0.0179727	0.0387522	0.0125251	0.0179533	0.00874738	0.0285605	0.0374918	0.0354547	0.0297737	0.00897505	0.00954563	0.0394695	0.0220507
1471	C	0.0381716	0.0176351	0.0190295	0.0245972	0.0174902	0.0169592	0.00906701	0.0268408	0.0254173	0.0191077	0.0256213	0.0268914	0.046375	0.0312077
1472	C	0.0474789	0.0175762	0.0189645	0.061297	0.00870019	0.0337098	0.0178667	0.0176507	0.0251889	0.018843	0.00843526	0.0355999	0.0153846	0.0410973
1482	C	0.0289575	0.0175685	0.0378716	0.0247494	0.00875503	0.0170488	0.0955525	0.11133	0.0913849	0.0566626	0.1009	0.0429775	0.0159553	0.144166
1488	C	0.0411565	0.0560538	0.0603076	0.0671592	0.0469395	0.0740672	0.0180881	0.0446788	0.0525855	0.0204082	0.0536817	0.0460448	0.0351958	0.0331309
1493	C	0.0328407	0.0595474	0.0320924	0.0144363	0.0389408	0.0583771	0.0830718	0.119595	0.132861	0.0524384	0.108735	0.0372787	0.0474293	0.0780379
1501	C	0.0554385	0.0301629	0.0110705	0.0290023	0.00985416	0.0204666	0.0475421	0.00947149	0.0273174	0.0218579	0.0186498	0	0.0418454	0.0358637
1502	C	0.0111882	0.040638	0	0.0147471	0	0.0103284	0.0286178	0.00952744	0.00913159	0.0219974	0.0466114	0.0192178	0.0105652	0
1503	C	0.0109697	0.06003	0.0441501	0.0145836	0.0192326	0	0.0273698	0.0454174	0.0612906	0.0627878	0.0169808	0.0361304	0.0410678	0.0226014
1512	C	0.119943	0.0708574	0.112158	0.0438084	0.0871924	0.0594354	0.0668577	0.0575209	0.0278319	0.0438645	0.061382	0.0553301	0.103402	0.0466364
1513	C	0.0839719	0.164681	0.0958977	0.139801	0.0805658	0.0912492	0.0652255	0.121348	0.117594	0.0957345	0.148466	0.146262	0.0778059	0.0676666
1518	C	0.0367017	0.0228964	0.0124347	0.0323468	0.0804586	0.0103972	0.0514721	0.0308515	0.0698812	0.0238863	0.0266975	0.0276702	0.0225251	0.012219
1521	C	0.0633794	0	0.0526385	0.0503187	0.0420698	0.0433323	0.0105407	0.042092	0.030804	0.0245128	0	0.0186289	0.0822949	0.0500563
1523	C	0.126502	0.0599233	0.0262158	0.0498091	0.0103831	0.107828	0.0944882	0.0521921	0.0711961	0.0613874	0.0623386	0.0183672	0.186807	0.0500063
1525	C	0.0616295	0.0937427	0.0378692	0.0319438	0.0199661	0.0727424	0.15339	0.0918461	0.168117	0.181006	0.0694143	0.0451386	0.156915	0.0987411
1527	C	0.169271	0.08626	0.0917191	0.234821	0.206505	0.138136	0.266039	0.214373	0.137322	0.169533	0.14711	0.117839	0.207756	0.160237
1529	C	0.09375	0.117942	0.0900495	0.14059	0.1396	0.0242718	0.0543537	0.0646273	0.0724488	0.0521716	0.045212	0	0.0518941	0.106143
1532	C	0.0487409	0	0.0154703	0.0207426	0	0.0126887	0.0235571	0	0	0.0282486	0	0.0211104	0.0132943	0
1534	C	0.0161551	0	0.0307598	0.0413565	0.0363769	0.0379411	0	0.0235599	0.0112183	0.0284414	0.00982898	0.0106815	0.0265111	0.014637
1538	C	0.0775074	0.0439818	0.0444313	0.0399202	0.0355703	0	0.167504	0.213498	0.375683	0.0430663	0.177253	0.140541	0.0256575	0.11725
1542	C	0.0160953	0	0.0621311	0.0207641	0.0245218	0.0510269	0.109514	0.108372	0.0771803	0.0644226	0.0866457	0.0123289	0.0262467	0.0330633
1544	C	0.0163345	0.031343	0.0319132	0.105597	0.0247188	0.0129082	0.0703928	0.0561561	0.106539	0.0666001	0.044287	0.0255135	0.133779	0.0851934
1547	C	0.0160462	0.0154036	0.015674	0.0827986	0.0361838	0.0253936	0.146477	0.0294334	0	0.0345423	0	0.0131891	0	0.0178827
1553	C	0.0502765	0.0161891	0.0325309	0.0653452	0.0381001	0	0.068306	0.0346681	0	0.0397377	0.0128057	0.0158053	0	0.0213311
1554	C	0.016592	0.0321285	0	0.0216967	0	0	0.0675562	0.0511247	0.0477859	0	0	0.0155715	0.0537996	0.0209908
1557	C	0.0518941	0.0335402	0.0500751	0	0.0261335	0.0263401	0	0.017934	0.0498836	0.0410172	0.013089	0	0.0551953	0.021796
1558	C	0.0174338	0.0170242	0.0335796	0.0460936	0	0.0131458	0	0	0.117687	0.0207254	0.0131441	0.0162075	0.027552	0.0219443
1559	C	0.0176087	0.069025	0	0.0465766	0.0133726	0	0.0179598	0.0184502	0.0170561	0.0423012	0.0133067	0.0330907	0.041632	0.0223164
1562	C	0.0177022	0.017334	0.0339789	0.0706547	0.0405296	0.0657376	0	0.0735971	0.0850196	0.104668	0.0537057	0.0328515	0.0400802	0.0214638
1564	C	0.110355	0.0180963	0.0176991	0	0.0286944	0	0.0405186	0	0	0.0236016	0.0160436	0.0760312	0.0141824	0.0242601
1565	C	0.0545752	0.0178571	0.0526223	0	0.0423968	0	0	0	0.0377715	0.0700607	0	0.0188466	0.0139723	0.0240906
1568	C	0.125268	0	0.0342349	0.0713776	0.0563063	0.0137703	0.0355366	0.0368528	0.050344	0.0829876	0	0.035317	0.0812018	0.0434122
1572	C	0.0508302	0.0324307	0	0.0446429	0.0686625	0.0138045	0.0780396	0.0322529	0.0294681	0.0182815	0.0675584	0.0989609	0.0264936	0
1574	C	0.0532481	0.0173581	0	0.0705219	0.0152835	0.046332	0.0484027	0.0335514	0.0152952	0.0566145	0	0.0364232	0.0283688	0.042735
1581	C	0.0728465	0.106933	0.10495	0.0959693	0.0578369	0.0149432	0	0.0318167	0.0298018	0.0904159	0	0	0.102474	0.0201005
1582	C	0.0367715	0.0538987	0	0	0.0438084	0.0151584	0.0155231	0.0160979	0.0302435	0	0	0	0.0594884	0.0203832
1583	C	0.0541419	0.0179856	0	0	0.0432713	0.0149499	0	0	0.0304229	0.0181258	0	0	0.0444444	0
1590	C	0.117256	0.281407	0.185071	0.164835	0.0698227	0.0147973	0.0332005	0	0.0339098	0.0387898	0	0.0273748	0.0489876	0.0909504
1591	C	0.0398406	0	0	0	0.0280781	0	0.0168124	0	0.0343171	0.0585023	0	0	0	0
1592	C	0.0403633	0.0209468	0.0214087	0	0.0141683	0	0.0339616	0.0176647	0.0347283	0	0	0	0.0335345	0
1593	C	0.0404613	0.0420256	0.0214638	0.057241	0	0.014941	0.0678426	0.0529194	0.0520924	0.0393701	0	0	0.066912	0
1597	C	0.0645578	0.0673703	0.0460936	0	0.0285796	0	0.0172622	0	0	0	0	0	0.0170532	0
1609	C	0.043735	0.0926355	0.0474721	0.234535	0.0861821	0.0441891	0.0697958	0.0723982	0.0362976	0.0610501	0.0959693	0.109542	0.0174125	0.0450045
1618	C	0.0204918	0	0	0	0.0412201	0.0141044	0.0339156	0.0698934	0.03462	0.0198847	0.0288046	0.0217984	0.0166306	0.0888494
1626	C	0.0191168	0.0198807	0.0204708	0.0251446	0	0	0	0	0.0181984	0.0419287	0.00953834	0.0110084	0.0331016	0
1627	C	0.0712758	0.018379	0.0573175	0	0.0241429	0.0120265	0.0352609	0.0548546	0.054605	0.042337	0.00931619	0	0.0153539	0.0497018
1628	C	0.0364166	0.0377003	0	0.0241663	0	0.0119303	0.0788333	0.0609632	0.0205212	0.0234412	0.00959049	0.0109709	0.0770891	0.0268456
1629	C	0.0183688	0.0385431	0.0601926	0.073278	0.0480192	0.0118161	0.0642811	0.177384	0.135105	0.0755097	0.0587889	0	0.0464253	0
1635	C	0.0189215	0.0194212	0.040783	0	0.0342075	0	0.0473709	0.0245218	0.0774994	0.0274123	0.0301781	0.0666963	0.0417304	0.0295596
1644	C	0.0136017	0.0129955	0.0133923	0.0550459	0.0838645	0.0327252	0.0505817	0.0785958	0.0554324	0.112835	0.0399521	0.0334859	0.0237982	0
1645	C	0.0657462	0.0125486	0	0.0177715	0.0246124	0.00805607	0	0.0258398	0.0547945	0.0837287	0.00990589	0.0110791	0.034965	0.03367
1646	C	0.0762195	0.0121758	0.0125031	0.0345543	0.0242033	0.0079384	0	0	0.0543478	0.0560224	0	0.0224039	0.0346061	0
1655	C	0.0127616	0.061267	0.0251414	0.0877039	0.0172102	0.0249917	0.140548	0.118371	0.118455	0.188273	0.206375	0.102158	0.0598086	0.284991
1660	C	0	0.0127747	0.0262123	0.0746269	0.00912825	0.0088098	0.093633	0	0.0458821	0	0.0244888	0.0271186	0	0.0629723
1666	C	0.0133174	0.063678	0	0.11215	0.0182565	0	0	0	0	0.0241371	0	0	0.0126823	0.0240848
1670	C	0.0948124	0.0129032	0.0132573	0.0573723	0.0185151	0.0178635	0	0.0367512	0.0347464	0.0461574	0.0464738	0	0.0129299	0.0225225
1682	C	0.0946842	0.064834	0.0685025	0.11396	0.0284387	0.0375446	0	0.0351741	0.0168862	0	0.024573	0	0.0543922	0.0205339
1683	C	0.0678426	0.0130259	0.0688895	0	0.0476917	0.0283983	0.0173822	0.0680967	0.0486697	0.0869187	0.0242483	0.0375047	0.0551496	0.0199601
1684	C	0.067815	0.0390523	0.0276167	0.0380952	0.0286697	0.0474068	0.0504371	0.0490918	0.0154488	0.0210084	0.0355114	0.024417	0.0138007	0.0192753
1687	C	0.0309789	0.0887968	0.0792142	0	0.0324394	0.0216474	0.0514139	0.0165837	0.0779423	0	0.0126056	0	0.113013	0.0192976
1688	C	0.0786658	0.060051	0.032175	0	0.0548968	0.0110497	0.0170387	0	0.0461752	0.021796	0.0253518	0	0.0992063	0.0192753
1689	C	0.0159591	0.0151953	0.0163425	0.0223714	0.0335833	0.0339367	0	0.0320924	0.0151194	0	0.0631233	0.0128766	0.0679348	0.0189753
1696	C	0.0728597	0.0529007	0.0192753	0	0.0693385	0.0316006	0.0346801	0.0165207	0.0153304	0	0.0142349	0.0144571	0.0690131	0.0387072
1698	C	0.138944	0.0765111	0.0209074	0	0.0774473	0.129271	0.107392	0.0850196	0.046919	0.117869	0.122231	0.0617379	0.158353	0.136933
1700	C	0.116604	0.274098	0.335138	0.164636	0.194439	0.281812	0.0683177	0.162259	0.0599341	0.271248	0.212282	0.0304507	0.233713	0.0374392
1701	C	0.353453	0.294433	0.336083	0.151688	0.25653	0.394089	0.0839772	0.064154	0.133492	0.134168	0.0771605	0.136861	0.480307	0.0364033
1703	C	0.208457	0.20564	0.374404	0.286065	0.338806	0.522345	0.280528	0.0789391	0.131464	0.131752	0.214625	0.21113	0.343643	0.0526593
1704	C	0.202102	0.170721	0.308325	0.338219	0.325866	0.161486	0.0505136	0.0160026	0.0296033	0.0451569	0.173831	0.0154036	0.208073	0.017618
1705	C	1.01429	0.54672	0.617284	0.386349	0.851869	1.03837	0.0680388	0.112903	0.11873	0.0228258	0.144555	0.0935891	0.31746	0
1708	C	0.253165	0.13468	0.182315	0	0.0676133	0.130463	0	0.0324254	0.0148346	0	0	0.016372	0.162866	0.0351803
1710	C	0.0655738	0.137363	0	0.0823045	0.139082	0	0	0.0320359	0	0	0.0344947	0	0.167411	0.0348614
1713	C	0	0.0698324	0.0980392	0	0.142857	0	0.034632	0.0164528	0	0.0230627	0	0	0.055991	0
1716	C	0.0667557	0.206044	0.0986193	0.1638	0.285307	0.21097	0	0.0174703	0	0	0	0	0.166759	0.0183925
1717	C	0.0665779	0	0	0.326531	0	0	0.0181917	0.0688942	0.0160849	0	0	0	0.220386	0
1738	C	0.123381	0	0.0727802	0.0788644	0.0647249	0.0887311	0.0241488	0.070922	0.0453104	0	0.0466527	0.0263574	0	0
1739	C	0.137174	0	0.156128	0	0	0	0.0491039	0.0240616	0	0	0.0481	0.027115	0	0.0541126
1740	C	0.0457666	0.197628	0.102407	0.125078	0	0	0.118963	0.0234412	0	0	0.0690608	0.136649	0.0387297	0.0514668
1742	C	0.0469043	0.0504541	0.205128	0.125786	0.193237	0.0545554	0.124688	0.0732959	0.0231214	0.0829646	0.264996	0.113701	0.0782473	0.0262123
1747	C	0.0502765	0.0545256	0.0538213	0	0	0	0.0596303	0	0	0	0.0581903	0	0	0
1750	C	0.0498256	0.0539665	0	0.0688231	0.0513611	0.0586166	0	0.0326904	0	0	0	0.0381388	0.0412201	0
1751	C	0	0.0541712	0.0534759	0	0	0	0.0326158	0	0.0322269	0.034965	0	0.0386698	0	0.033456
1752	C	0	0	0.106667	0.069541	0.0518672	0	0	0	0.0327332	0	0	0	0	0
1753	C	0	0	0.0527148	0.0686342	0	0	0	0.0337952	0	0	0.0329598	0	0	0
1755	C	0	0	0.0522739	0	0.101523	0	0	0.0328947	0	0	0	0	0	0.0340832
1756	C	0	0.0536481	0	0	0	0	0	0	0	0	0.0323206	0.126529	0	0
1762	C	0	0	0	0	0	0	0	0	0	0	0	0	0.0423908	0
1765	C	0.0509944	0.108401	0.0529661	0	0	0.0605694	0	0.0378788	0	0	0	0	0	0
1766	C	0	0	0	0.0704722	0	0	0.036075	0	0	0.147438	0	0.0427716	0.0440141	0
1767	C	0	0.0540541	0	0	0.0517598	0	0.0270051	0.0250564	0	0.0304229	0	0	0	0.0234522
1769	C	0	0	0	0	0	0	0	0	0.023546	0	0	0.0232775	0	0.0463822
1772	C	0.0492854	0	0	0	0.0485437	0	0	0	0.016728	0	0	0	0	0
1773	C	0	0.0519751	0	0	0	0	0.0374111	0.0176741	0	0.0452489	0	0	0	0
1774	C	0	0.0516529	0	0	0	0	0.0361272	0	0	0.022041	0	0	0	0.0179469
1778	C	0	0	0	0	0	0	0.01554	0	0	0.0199045	0	0	0.0369686	0.0308356
1783	C	0.185529	0	0	0	0	0	0.015024	0.0141323	0.0263123	0	0	0	0	0.015058
1785	C	0	0	0	0	0	0	0.0143164	0	0.024975	0.0364897	0	0	0	0.0145159
1794	C	0	0	0.094697	0	0	0	0.0277932	0	0.0244409	0.0356888	0	0	0.0735294	0.0144051
1798	C	0.13844	0	0	0	0.0877193	0.049505	0.0138274	0.0260586	0.0121227	0.0177242	0	0	0	0.0429123
1802	C	0	0	0.0478927	0	0	0	0.0137344	0	0.0120744	0	0	0	0.0370782	0.0569719
1807	C	0.0461255	0	0.0946522	0.0634518	0	0	0.0136818	0.0387547	0.0241255	0.0176523	0	0	0	0.0141543
1811	C	0	0.0966184	0.0469263	0	0.0866927	0	0.01374	0	0.01213	0.0177305	0	0	0.036523	0.0141884
1828	C	0.0573394	0	0.056338	0.0772201	0.103681	0	0.139944	0.138614	0.200547	0.104959	0.0853971	0.0254712	0	0.0761228
1833	C	0	0.0867303	0.168067	0.108342	0.0727273	0.093985	0.108108	0.140795	0.132013	0.144439	0.0834725	0.143678	0.219298	0.211416
1841	C	0	0	0.340136	0	0	0	0.0982318	0.579151	0.265252	0.10627	0.297324	0.128205	0	0
1842	C	0	0.813008	0.694444	0.423729	0	0.406504	0	0	0.0910747	0.109051	0.303644	0.398406	0	0.136612
1852	C	0	0	0	0	0	0	0	0	0	0	0	0	0	0
1853	C	0	0	0	0	0	0	0	0	0	0	0	0	0	0
1856	C	0	0	0	0	0	0	0	0	0	0	0	0	0	0
1865	C	0	0	0	0	0	0	0	0	0	0	3.125	0	0	2.38095

## Sheet: C>G
18s location	forward strand reference base	WT NaBH4 2-NH2-d-ATP HIV	75% WT NaBH4 2-NH2-d-ATP HIV	50% WT NaBH4 2-NH2-d-ATP HIV	25% WT NaBH4 2-NH2-d-ATP HIV	WT untreated 2-NH2-d-ATP HIV	WT untreated dNTPs HIV	WT NaBH4 d2-NH2-d-ATP SSIV	75% WT NaBH4 dNH2-ATP SSIV	50% WT NaBH4 2-NH2-d-ATP SSIV	25% WT NaBH4 2-NH2-d-ATP SSIV	WT untreated 2-NH2-d-ATP SSIV	WT untreated dNTPs SSIV	WT NaBH4 dNTPs HIV	WT NaBH4 dNTPs SSIV
3	C	5.88235	9.23077	4.10959	8.77193	10.3448	15.7895	4	0	9.375	11.7647	11.1111	6.25	6.17284	11.1111
4	C	1.66667	0	2.87356	1.78571	1.5625	5.17241	0	2.17391	1.1236	0	0	3.22581	3.7594	5
13	C	0	0.18622	0	0.297619	0	0.946372	0	0.161031	0	0.111982	0.179211	0.192493	0.516796	0
14	C	0.144509	0.641849	0	0.200401	0	0.431034	0.0974659	0.350775	0.101971	0.234192	0.129955	0.228415	0.191205	0.267523
17	C	0.17452	0.255537	0.0839631	0.486618	0.30722	0.454545	0.152993	0.237053	0.140562	0.0880475	0.171494	0.152022	0.416667	0.166445
18	C	0	0.150716	0	0.537634	0	0.273973	0	0.0327493	0.0530035	0	0	0.028393	0.388601	0.0609756
24	C	0.0574713	0	0	0	0.0555864	0	0.0425532	0.0275748	0	0.0154703	0.0140174	0.0718219	0	0
30	C	0	0.0517598	0	0	0.0967586	0	0.0114771	0.0113097	0.0362713	0	0.0116158	0	0	0.0502428
35	C	0	0	0.052687	0.139373	0	0	0.0655738	0.0215703	0	0	0	0	0.0573066	0.0464684
37	C	0	0	0.0463392	0.239378	0.0402091	0	0.00915667	0.00886132	0.00973994	0.00987849	0.00908018	0.0112727	0.142518	0
48	C	0.035014	0.116505	0	0.0544959	0.0751315	0	0.00795672	0.0313308	0.0172801	0	0.0160681	0.0195963	0.0436681	0.0201593
49	C	0.0697107	0.0766871	0.0437445	0	0.149533	0.0464253	0	0	0.00846812	0.0335149	0.015794	0.00960892	0.0864678	0
53	C	0.0335008	0	0.042735	0.156006	0.07249	0.0446828	0	0.00741125	0	0	0	0.00913159	0.0415455	0.00936417
58	C	0.0316156	0.0700771	0	0.04914	0	0	0.007122	0.00708717	0	0	0.00726058	0.00865951	0	0
65	C	0	0.105783	0	0.0491642	0.0361011	0.127065	0.0208957	0.0138552	0.0152033	0.00738389	0.0284051	0.0336842	0.19755	0.0261188
67	C	0.254939	0.358423	0.522648	0.643564	0.480059	0.424628	0.0277219	0.0068861	0	0.00733299	0	0.0418445	0.401445	0.00865202
69	C	0.276498	0.414651	0.33741	0.707547	0.460177	0.696151	0.0207054	0.0068348	0.0376591	0.0291481	0.014041	0.0249377	0.574493	0.0430034
72	C	0.536536	0.595745	0.68306	0.630798	0.345125	0.862344	0.0203376	0.0738999	0.036808	0.00715001	0.0411833	0.0562385	0.874548	0.0586658
73	C	0.102722	0.230681	0.309811	0.183824	0.316456	0.263939	0.00718494	0.0214316	0.0232468	0.0148854	0.0144352	0.0344501	0.364964	0.0266335
78	C	0.0291971	0	0.0400802	0	0.102705	0.0350018	0.010015	0	0	0	0	0.0104844	0	0
86	C	0.0686028	0	0.0329815	0.0657678	0.109051	0.0286862	0.0103413	0	0	0	0.0204353	0.0101667	0.027137	0.0105619
89	C	0.0614376	0.0222025	0	0.029146	0.0237756	0.0262536	0.0105031	0	0	0.0101812	0	0	0	0
96	C	0.0525394	0.0364498	0.0242014	0.0245399	0.0589391	0	0	0	0.0368053	0.0216661	0	0	0	0.0239923
98	C	0	0.0184196	0	0.0249314	0	0	0.0137061	0.013986	0.028641	0.025227	0.0131822	0	0	0
106	C	0	0	0.0205508	0.0209864	0	0	0	0.011489	0	0.0106293	0	0	0	0
117	C	0.0138064	0	0	0	0	0	0.0218938	0	0.0119474	0.0206228	0	0.0132802	0	0.0257036
118	C	0	0	0	0	0	0	0	0.0105208	0.0116131	0	0	0	0	0
125	C	0.0238493	0.0120671	0.0466418	0.0490677	0.0120091	0	0.0257976	0.00851209	0.0192271	0.0673627	0.0242758	0	0	0.0106883
127	C	0.0570451	0.0230309	0.0294118	0.0316256	0	0.0333778	0.0402998	0.072023	0.00905305	0.0320924	0.015259	0	0.0179986	0.0102754
129	C	0.0454236	0.0114443	0.0439625	0.062315	0.0114181	0.0500167	0.0232306	0.0385238	0.052498	0.0463786	0.00737191	0	0	0.0398565
131	C	0.070118	0.0117467	0.0452352	0.0960769	0	0.0174004	0.00776458	0.00773335	0.0262858	0.0311745	0.00744435	0.0105441	0.0370165	0.0202532
133	C	0.0236827	0.0119632	0.0306232	0.0325468	0.0356718	0.0533618	0.0309478	0.0308952	0.0703235	0.0232829	0	0.0316489	0.0560957	0.0400681
134	C	0.0119104	0.0240877	0.0309693	0.0164366	0.0239149	0.0897022	0.0154979	0.0154883	0.0264714	0.031272	0.0524345	0.0211909	0.0376364	0.040286
136	C	0.0239779	0.036324	0.0311721	0	0.0361098	0.0181225	0.00770416	0.00769941	0.00884408	0.00779302	0.00748727	0	0.0567752	0.0100766
138	C	0.0119947	0.012133	0.0156568	0	0.0120569	0.018162	0.0308594	0.0385862	0.0177557	0.0313112	0.00751767	0.0213858	0.0379867	0
139	C	0.0120265	0.0243309	0.0470514	0.0332171	0.0725338	0.0182749	0	0.0619627	0.0534616	0	0.0377529	0.0541712	0	0.0205128
142	C	0.0250376	0	0	0.0515996	0.0251604	0.0389181	0.00791703	0.0159185	0.027533	0.016107	0.0467909	0.0347705	0	0.0107945
151	C	0	0.0138562	0.0345662	0.0556896	0.0275065	0	0	0.0163159	0.00944287	0	0	0	0	0
162	C	0	0.0462107	0.0186881	0	0.0151057	0.0453309	0.00784068	0.00804117	0	0	0.00801089	0.0117412	0	0.0112158
168	C	0	0.0140687	0	0	0.0269978	0	0.0185667	0.0187196	0.0413522	0.0103146	0.0186185	0	0	0.0125786
174	C	0.0276587	0.0142796	0.0181028	0.0191791	0	0.049505	0.009243	0.00934842	0.0305623	0.0207663	0.0186933	0.0118765	0.0519076	0.0122115
178	C	0.105332	0.0551116	0.0528914	0.0539763	0.0689655	0.115634	0.0266809	0.0538745	0.115841	0.0403511	0.0452243	0.0551511	0.270071	0.0344947
179	C	0.0634357	0.0529521	0.137481	0.156114	0.106581	0.157516	0.0952793	0.121718	0.157349	0.226155	0.182911	0.0429599	0.339476	0.0339866
182	C	0.179361	0.149682	0.11626	0.160746	0.176078	0.187032	0.460907	0.483051	0.500835	0.473613	0.429365	0.325932	0.249094	0.415664
186	C	0.174825	0.209236	0.110327	0.347922	0.0897532	0.263536	0.255553	0.358709	0.347759	0.182087	0.323974	0.144172	0.395778	0.083702
188	C	0.309689	0.467925	0.714605	0.516224	0.595415	0.499762	0.10201	0.113414	0.136973	0.164474	0.120555	0.0999001	0.327869	0.134277
192	C	0.0148633	0.0301023	0.0220556	0.018406	0.0442022	0.023359	0.0320171	0.0429323	0.010143	0.0246305	0.0520996	0.0225759	0.0962696	0.012577
193	C	0.0150286	0	0.0221435	0.0373274	0	0	0.0325486	0.0217912	0	0.0252461	0.0105252	0.0113882	0.048158	0
194	C	0.0450653	0	0	0.0556896	0.0590232	0.0233918	0.0327475	0.0219082	0.0411269	0.0253807	0.0317292	0.0114064	0.0238493	0.0258465
195	C	0.119778	0.120373	0.0873553	0.148011	0.220718	0.0933271	0.0218174	0.0547166	0.0409668	0.0507937	0.0211149	0.0567924	0.189215	0.0387047
196	C	0.0444115	0	0.0856531	0.0183756	0.058072	0.0448934	0.109517	0.0330396	0.0814664	0.165415	0.105108	0.0555617	0.152772	0.0383338
199	C	0.111951	0.0968456	0.0743909	0.10274	0.0399308	0.10305	0.0109194	0.0218388	0.0605388	0	0.0103842	0.0656527	0.133792	0.0380228
201	C	0.186493	0.0913957	0.20308	0.130762	0.0752729	0.0778816	0.151106	0.150586	0.137958	0.11236	0.0920434	0.118957	0.265252	0.275966
212	C	0.0971817	0.0517598	0.0248262	0.0133761	0.0602652	0.0456274	0.0863061	0.0570613	0.142069	0.100863	0.0450005	0.00993542	0.0899512	0
216	C	0.0107921	0.0206164	0.0122339	0.0262985	0.0605632	0.0148126	0.0404735	0.0595415	0.0685401	0.0233046	0.0186116	0.0100664	0.0362056	0.0238578
223	C	0.0325062	0	0.0485496	0.0131303	0.0207383	0.0291036	0.0737619	0.0928697	0.0348736	0.0482102	0.048384	0.0742469	0.0441745	0.0622278
228	C	0.0235183	0.0229358	0.0131165	0.0141603	0.0353732	0.0146929	0.0331748	0.0776915	0.08412	0.102775	0.138993	0.0567215	0.032041	0.0501316
233	C	0.0119789	0.0116117	0	0	0.0119033	0	0.0447427	0	0.0474383	0.0393701	0.0540599	0.0226244	0.0107101	0.0503081
234	C	0	0.01178	0	0	0	0	0	0.0229806	0.0192753	0.0270526	0.0330761	0	0.010917	0
237	C	0.0245912	0.0354694	0.0661989	0.0296252	0.0359842	0.0609477	0.195537	0.103377	0.183806	0.135556	0.174978	0.106207	0.0429553	0.0531067
238	C	0.051079	0.085293	0.0268998	0.0462463	0.0244349	0.0316306	0.109609	0.14579	0.160353	0.171453	0.137757	0.102341	0.0659848	0.0718701
239	C	0.0525486	0.0249377	0.0271592	0.0474458	0	0.0319744	0.0245248	0.061065	0.071066	0.0431034	0.0463929	0.0634437	0.121079	0.0566653
243	C	0.0151561	0	0	0	0.0551268	0.0699178	0.0815993	0.0801603	0.199203	0.0797575	0.0376317	0.0953549	0.0575573	0.13587
246	C	0.0324359	0.0606888	0	0	0.0441826	0.0181884	0.0285225	0	0.0116293	0.0673174	0.0527357	0.0702346	0.0241604	0.0315756
247	C	0.0486539	0	0	0	0.0147232	0.0179856	0.0277778	0.0408497	0.0114168	0.0660284	0.0641108	0.0679163	0.0240587	0.0154823
248	C	0.0164312	0.0458645	0	0.0202429	0	0.0179565	0.054444	0.0801496	0.0340716	0.0162075	0.0499938	0.0660677	0	0.0452967
249	C	0.0158053	0	0	0.019685	0	0	0.0381146	0.0626174	0.0538271	0.0303951	0.0233291	0.0617284	0.0240993	0.0423908
251	C	0.0155376	0.0290994	0.014708	0.0193836	0	0.0170619	0.0365943	0.0480423	0.0103713	0.058292	0.0334076	0.024024	0.0119019	0.0548396
253	C	0	0.0132696	0.0278048	0.0175593	0	0.0157356	0.0113135	0.0111433	0.0192511	0.0134409	0.0103178	0	0	0.0128271
254	C	0	0.0132048	0.0277508	0	0.0253197	0	0.0225124	0	0.0287081	0.0133654	0.0102796	0	0.0113237	0.0383338
257	C	0.0137514	0.0259437	0.0414422	0.0343053	0.0496339	0.0154297	0.055457	0.0219154	0.0757935	0.0525693	0.112451	0.125199	0.0115942	0.0379459
258	C	0.013508	0.0254485	0.0272851	0	0.0243487	0.0152138	0.0986193	0.0864398	0.0561693	0.0649098	0.121556	0.169837	0.0114929	0.0877743
259	C	0	0.0132188	0.0582411	0	0.0509944	0.0315159	0.0658256	0.0216802	0.0375763	0.0259841	0.101616	0.148064	0.0361751	0.0877523
260	C	0.0504923	0.0603064	0.0414479	0.0162285	0.0707881	0.0150512	0.0952482	0.0419155	0.0731061	0.0378884	0.059453	0.211652	0.0237164	0.097052
263	C	0.0126422	0	0.0287977	0.0163452	0.0241692	0.0312012	0.0418717	0.0103584	0.0367074	0.0248633	0.039374	0.0555803	0.0376742	0.0724463
264	C	0	0.025	0.015193	0.033389	0	0	0.0739098	0.145955	0.102555	0.111857	0.0596481	0.157533	0.0668092	0.0848691
271	C	0.0127828	0.0125628	0.0618525	0.0661048	0.0125865	0.0331126	0.146199	0.204876	0.212766	0.108434	0.107223	0.0648859	0.0414823	0.129229
275	C	0.0275748	0.0273411	0.0172295	0.0538406	0.0275482	0.0347403	0.0796178	0.0898473	0.0622213	0.0896402	0.0532141	0.0227118	0.0593472	0.0485673
277	C	0.0138217	0.0413052	0	0.107527	0.0690703	0.0353544	0.1927	0.179171	0.155958	0.140629	0.160188	0.0924855	0.0917011	0.135786
278	C	0.0408219	0.0542888	0.0172117	0	0	0.103341	0.0221607	0.0109397	0.0707786	0.0627274	0.0208398	0.0226347	0.119261	0.0484086
281	C	0	0.0412371	0	0.0177968	0.0274914	0.14319	0.111	0.0761283	0.0809553	0.0376034	0.14629	0.0575772	0.062383	0.137534
284	C	0.0136986	0.0411353	0	0.12385	0.0273411	0.0176866	0.0221729	0	0.030389	0.0625156	0	0.0114758	0.0151791	0.0249501
293	C	0	0.0477783	0.0151263	0.0312598	0.0334934	0.0146972	0	0	0.0268336	0.0114877	0.0188537	0	0	0
295	C	0.0112196	0	0.0419992	0.0292312	0.0306874	0.0134716	0.0189988	0.0186637	0.0169276	0	0	0.0103061	0.0354484	0
303	C	0.0280531	0.0277469	0	0	0.0168095	0.0118413	0	0	0	0	0	0.020002	0.0107193	0
304	C	0.017507	0.0435047	0.0454339	0.0908781	0.0482199	0.058126	0.0512821	0.0597678	0.0393732	0.0199561	0.0410273	0.0294985	0.0724263	0.0657678
306	C	0.0770021	0.0595593	0.0111707	0.0775537	0.0634065	0.0347062	0.170503	0.187346	0.283019	0.187636	0.245962	0.14875	0.102934	0.218938
310	C	0.0759301	0.102402	0.0242807	0.12133	0.0762389	0.0497822	0.0772947	0.0865967	0.0779693	0.0444939	0.0845944	0.149804	0.0559409	0.0124891
311	C	0.0378465	0.0461808	0.0119446	0.048432	0.0335121	0.0851478	0.046503	0.111483	0.0745465	0.0651112	0.11698	0.0774593	0.0549632	0.0846228
315	C	0.0376861	0.00911743	0.0234769	0.0479559	0	0.0121847	0.0272752	0.0180261	0.0244678	0	0.00881912	0.0215332	0.0108921	0
317	C	0.00905141	0.00873591	0.0225632	0.0229859	0.0081314	0.0466527	0.035461	0.0613551	0.0716903	0.0313349	0.0172936	0.0420477	0.0311268	0.034961
319	C	0.0448511	0.0345155	0.0336172	0.0341491	0.0402706	0.03465	0.149228	0.251758	0.157642	0.072329	0.179518	0.144494	0.030744	0.125413
321	C	0.0487282	0.0187988	0.0242336	0.0364786	0.00864379	0.0242248	0.0181868	0.0270197	0.0651572	0.0318979	0.035264	0.0105574	0.0105887	0
322	C	0.0391926	0.0189072	0	0.0122309	0	0.0242395	0.0364564	0.0361533	0.0325706	0.0106474	0.0176554	0.0211193	0.0315856	0.0235322
323	C	0.0295829	0.0189843	0	0.0244648	0.00865876	0	0.00912659	0.0271616	0.0243823	0.0213584	0.0440645	0.0105407	0.020993	0.0352692
324	C	0.0779195	0.0465853	0.0235156	0.0480134	0.0253207	0	0.0361696	0.0626006	0.0559239	0.0424358	0.0695048	0.0622213	0.0614439	0.0581598
325	C	0.0390016	0.0186463	0.0234274	0.0479157	0.0421727	0.0239378	0.0180294	0.0801496	0.0715137	0.0635122	0.0691982	0.0412754	0.0511404	0.0696379
326	C	0	0.0467858	0.0819193	0.011999	0.0338095	0.0599089	0.0178971	0.0177101	0.0236742	0.0633847	0.0085955	0.0306341	0.0305842	0.0461042
331	C	0.0295217	0	0.0117082	0.036049	0.0170198	0.0121183	0.00888573	0.0527565	0.0156703	0.0316957	0.00861698	0	0.0102051	0.0116496
334	C	0.0195599	0.0374181	0	0.0359281	0.025508	0.0121139	0.025771	0.0342173	0.0384527	0	0.0168976	0	0	0.0224947
337	C	0.00983284	0.00941354	0.0117137	0.0603938	0.00855945	0.0121966	0	0	0.0154799	0.0406628	0	0.020536	0.0102638	0.0225276
340	C	0.0297147	0.0283822	0.0117192	0	0.0172414	0.0249066	0.0257047	0.00854774	0.0154048	0.0201086	0.0168762	0.0207189	0.0104395	0.0112246
341	C	0	0	0.0234	0.024417	0.0172577	0	0	0	0.00770772	0	0.00843028	0.0102934	0	0
342	C	0	0.00947239	0	0.0122041	0	0.0123854	0	0.0170111	0.015361	0	0.0168152	0	0.021004	0
346	C	0.0185908	0.00894775	0	0.0460458	0.0248653	0.0119732	0	0	0.00708316	0.00921999	0.00782228	0.00950661	0.0299581	0.020139
350	C	0	0.0185856	0.02292	0.011966	0.0176632	0.0253839	0	0.0161381	0.00728704	0.0190241	0.0241526	0.0193181	0.042653	0.0205444
353	C	0.0205149	0	0.0246548	0.0126887	0	0.0145773	0.0855066	0.0684697	0.0772141	0.0605694	0.0514668	0.0518027	0.0715734	0.0435398
356	C	0.0345861	0.0341219	0.0141064	0	0.01167	0.0502849	0.0666984	0.0663759	0.0669568	0.0222395	0.0286971	0.126017	0.0540979	0.0475907
357	C	0.0243279	0	0.0739208	0.060042	0.0372024	0.0351927	0.0396786	0.0493681	0.0432563	0.0807196	0.0694651	0.0237501	0	0.061177
358	C	0.0851305	0.083682	0.102197	0.0696986	0.090009	0.0650336	0.181449	0.128301	0.13903	0.135335	0.171784	0.133032	0.0488759	0.0525901
362	C	0.0426318	0.0140154	0.0169377	0.0518762	0.0754831	0.0216873	0	0.0298716	0.0519841	0	0.010022	0.0122835	0	0
365	C	0	0	0	0	0	0.0455373	0.0105977	0	0	0	0	0	0.0171409	0.0125644
369	C	0.017838	0.01734	0.0201005	0.0432152	0	0	0.0322061	0	0.00920048	0.0366838	0.0210571	0.0127665	0.0183993	0.0253197
379	C	0.0682128	0.0231481	0	0.0275255	0.0719424	0.0702988	0.0120135	0	0.0104877	0.0133672	0.011936	0	0.0455477	0.0279916
381	C	0	0.138122	0.0529801	0.0273075	0	0	0.035482	0.0470035	0.0312207	0.0132205	0.0352485	0.0143184	0.0224568	0.0415167
382	C	0	0.0232126	0.053749	0.0274499	0	0.0353982	0.0592066	0.0234412	0.0521268	0.0132275	0.0587406	0.0573394	0	0.083068
386	C	0	0.026455	0.0959386	0	0	0	0.0506393	0.0755287	0.0679964	0.0699105	0.0762486	0.0943545	0.0504668	0.0441501
387	C	0	0.0265182	0.0960307	0.0924214	0.0290107	0.0783392	0.0879397	0.0373972	0.0671742	0.027697	0.0628852	0.0309119	0.0998502	0.0289519
390	C	0	0	0	0	0	0	0	0.0508906	0.0579979	0.014041	0.0129249	0	0	0.0292826
391	C	0	0	0	0.0634518	0	0.0795862	0.0261575	0	0	0.0143534	0.0395622	0	0	0
399	C	0.121389	0.0252016	0.0891795	0.0597372	0	0.036062	0.0369504	0.0490617	0.0881057	0.0820008	0.0750751	0.01485	0.0478469	0.0285755
400	C	0.0744232	0.0519751	0.0921376	0.0922793	0.141243	0.0368189	0.0507421	0.0252302	0.0454856	0.0420109	0.0259067	0.045427	0.0739463	0.0290698
402	C	0.0752445	0.0522603	0.0626174	0.124688	0.172712	0.189753	0.347222	0.243278	0.484429	0.155852	0.314837	0.276625	0.100985	0.234639
409	C	0.105848	0.187919	0.197239	0.389231	0.0572738	0.148588	0.282372	0.384717	0.454657	0.288517	0.33026	0.311884	0.207954	0.236407
417	C	0.066379	0	0.0200844	0.0638706	0.0174004	0.0427625	0.0582343	0.0345941	0.0225378	0.0626096	0.0126582	0.0428021	0.0324044	0.0266276
424	C	0	0.0102176	0	0.0276472	0.0335196	0.0141703	0.0311429	0.0104921	0.0944783	0.0455892	0.0476815	0.0407443	0.0234549	0
429	C	0	0.00996016	0.0245339	0.0135465	0.0108566	0.0270746	0.0103681	0	0.0208398	0.0227635	0.011956	0	0.0338295	0.025227
430	C	0	0.00975324	0.0119847	0.0263748	0	0.0133174	0.0203791	0	0.0102533	0.0224947	0.0352941	0.0133654	0.0774165	0.0246579
441	C	0.00997805	0	0	0.0793441	0.0321027	0.054003	0.0522084	0.105966	0.107101	0.0913555	0.0646496	0.102279	0.057346	0.0663658
442	C	0.0296589	0.00944465	0	0.0261575	0	0	0.0303459	0.0513347	0.0417101	0.0111025	0.0503842	0.0427168	0.0452899	0.0513743
450	C	0	0.00870928	0	0	0	0.0122971	0.0442243	0.0182249	0.00944465	0.00976562	0.0112549	0	0	0.0228624
453	C	0	0	0.0104037	0.0120221	0	0.0369094	0.0872981	0.0906947	0.130658	0.0868307	0.0668822	0.0500375	0.0524934	0.0224643
456	C	0.037013	0	0.010686	0.012219	0.0302358	0.0250031	0.0352361	0.0369583	0.0287742	0	0	0.051079	0.0640889	0.0224795
457	C	0.00926698	0	0	0.0122504	0.0201837	0	0.0175392	0.0461595	0.0192289	0.00969086	0.0226963	0.0127747	0.0213927	0.0112233
459	C	0.00922594	0	0	0.012222	0	0	0.0257754	0.0361468	0	0.019073	0	0.0249813	0	0.010983
462	C	0	0.00887784	0	0	0	0.0124735	0	0.00880359	0.0372439	0.00932836	0	0	0.0106112	0.0108295
463	C	0	0.0177651	0	0.0122279	0	0	0	0.00874738	0.00923702	0.00924984	0.0214823	0	0.0106033	0.0107446
472	C	0.0417188	0.040032	0.0480711	0.0822481	0.034321	0.0142126	0.0359034	0.0384172	0.0207814	0.0302755	0.0475229	0.068018	0.0250564	0.0240356
475	C	0.109421	0.0843882	0.0506073	0.142857	0.0732422	0.0609292	0.0541663	0.164713	0.219573	0.0801925	0.0477441	0.123035	0.135135	0.181576
479	C	0.1114	0.119617	0.130114	0.112179	0.154668	0.177242	0.167801	0.180687	0.366379	0.134381	0.319803	0.202576	0.154823	0.127812
481	C	0.132521	0.140827	0.138483	0.169779	0.223881	0.18379	0.275634	0.418077	0.489787	0.211544	0.41632	0.234418	0.305761	0.307692
483	C	0.0848608	0.115531	0.118694	0.148968	0.268097	0.160809	0.166797	0.233199	0.266312	0.149429	0.254097	0.103017	0.229973	0.259841
490	C	0.0739782	0.0728597	0.0661084	0.0921447	0.0428266	0.100781	0.0884347	0.0421541	0.033389	0.0430015	0.0632671	0.0725795	0.0825083	0.0387747
491	C	0.0182749	0.0181422	0.153982	0.0685244	0.0213402	0.124564	0.00953016	0.010203	0.0536423	0.0104254	0.0480538	0.0138831	0.0411607	0.01239
492	C	0.0370165	0.0183722	0.0446628	0.0460617	0.0865239	0.0506201	0.0191223	0	0.0645925	0.020938	0.0722456	0.0277239	0.0626566	0.0248047
494	C	0.12131	0.0613246	0.180692	0.17735	0.146021	0.130174	0.115797	0.12398	0.205628	0.0957651	0.09656	0.0405789	0.126743	0.0243635
496	C	0.0763359	0.0587659	0.0247647	0.0477783	0.137206	0.316225	0	0.0101657	0.0421941	0.103306	0.0115714	0.0516262	0.138779	0.0232693
497	C	0.0564016	0.0965437	0.0982077	0.117841	0.0900293	0.264042	0	0.0203231	0.0524769	0.030931	0.0115048	0.0256213	0.175953	0.0577434
498	C	0.0186951	0.0386026	0.0735474	0.305451	0.067325	0.215931	0.0189538	0.0305686	0.0420787	0.0206676	0.0345383	0.0256312	0.253609	0.0461574
501	C	0.240875	0.248566	0.14742	0.484206	0.288825	0.802834	0.0772499	0.0835596	0.117521	0.0847637	0.12876	0.0516062	0.710992	0.0696217
502	C	0.275938	0.190767	0.243427	0.481541	0.351648	0.771569	0.0890384	0.0859291	0.087165	0.0869093	0.0119717	0.0793651	0.771257	0.0718993
503	C	0.180654	0.339501	0.472407	0.32888	0.484027	0.459082	0.246126	0.208997	0.291223	0.19019	0.252942	0.256254	0.561535	0.334336
517	C	0.0520427	0.0661026	0.0151446	0.0158529	0.0421289	0.0356189	0.0953471	0.1002	0.0852434	0.101926	0.0646134	0.0129668	0.0130565	0.0602555
527	C	0.0111086	0	0	0	0.011566	0	0.00988826	0.0209358	0	0.0104877	0	0.0135227	0	0
532	C	0	0.010012	0.0109577	0	0	0.0138351	0.0679414	0.0517063	0.0383988	0.0412286	0	0.0267415	0	0.0376176
537	C	0.0212811	0.041301	0.0329779	0.0131631	0.0105876	0	0.102281	0.0762527	0.0501253	0.0854884	0.0683995	0.0693385	0.0328335	0.0260552
539	C	0	0	0	0.0132943	0.0212902	0.0142694	0	0.0111445	0	0.0108295	0	0	0.0109721	0
543	C	0.0212224	0.030804	0	0.0261849	0.0319966	0.0722439	0.0207361	0.0226219	0.0215657	0	0.0118864	0	0.0218031	0.0133387
548	C	0.0105152	0.0101389	0.0108213	0.0517397	0.0210793	0.0432588	0	0.0227169	0.0328156	0.0109613	0.0119204	0	0.0216638	0.027356
549	C	0.0210904	0.0203355	0	0.0518874	0.0211238	0	0.0104866	0.0227972	0.0109481	0.0109625	0.0119403	0	0.0217179	0.0137231
550	C	0.0421274	0.0304044	0.0107805	0.02589	0.0210504	0.0144823	0	0.0337306	0	0.0216497	0.0700525	0	0.0432432	0.0543109
567	C	0.00997904	0	0.0104102	0.012279	0.0101605	0.0143287	0.0192345	0.0106045	0.043122	0.0393856	0.0329888	0.0569963	0	0.0129803
568	C	0	0	0.0104297	0.0122564	0	0	0.0482346	0.0532708	0.0866457	0.0394555	0	0.0427472	0	0.0258866
570	C	0	0	0.0104581	0.0121832	0.0101368	0.0288684	0.145758	0.205339	0.143805	0.139068	0.0554939	0.0575291	0	0.0652997
578	C	0.0223264	0	0.0126103	0	0	0	0	0	0	0	0	0.0130225	0	0.0117206
579	C	0	0	0.0252493	0	0	0.016581	0	0	0	0	0	0	0	0
585	C	0.046811	0.0236967	0	0.0722648	0.0898357	0.0549753	0	0.00996314	0.0103552	0.00910498	0.0102239	0	0.0550661	0.0224366
592	C	0.039604	0.0136314	0.0158178	0.0162655	0.0149723	0.0202552	0	0.0308356	0.0106712	0.00945716	0.0106644	0.0121625	0.0295029	0.0227609
593	C	0.0268025	0	0.0160875	0.0329598	0.0152323	0.0818833	0.00924556	0.0103125	0	0	0	0	0.0148236	0.0114181
603	C	0.0821018	0.0677231	0.0619579	0.0658111	0.0566251	0.107469	0.0658452	0.051573	0.122026	0.0390358	0.107423	0.0476758	0.0808081	0.103164
608	C	0.100025	0.0728067	0.0428878	0.015193	0.0126088	0.0474909	0.0266241	0	0.0288795	0	0.0100422	0.0223789	0.0126968	0.0109697
614	C	0.121907	0.0587199	0.0707214	0.0740083	0.082382	0.121618	0.068047	0.0974237	0.106394	0.0403755	0.0439126	0.0474102	0.0895828	0.0694444
615	C	0.0238095	0.0342427	0.110528	0.0288976	0.0570776	0.0589623	0.126373	0.0971503	0.126609	0.111134	0.0438885	0.0480077	0.0877303	0.0232748
618	C	0.0261677	0.111593	0.0749176	0.0624805	0.132674	0.153563	0.147987	0.139785	0.104844	0.158747	0.134228	0.0589901	0.146082	0.141359
621	C	0.0641766	0.06054	0.0863558	0.122794	0.126816	0.117113	0.0289268	0.0416103	0.040205	0.0209183	0.0108389	0.0231	0.194452	0.0117302
622	C	0.025091	0.0823142	0.0823158	0.0747608	0.054933	0.0693385	0.0380409	0.061287	0.0292654	0.0414379	0.0528206	0.0559534	0.0844187	0.0684932
624	C	0.0736106	0.193138	0.11586	0.173888	0.226198	0.201153	0.214312	0.207962	0.222119	0.307094	0.193109	0.237966	0.231401	0.244417
632	C	0.0232693	0.031689	0.0116904	0	0.0186133	0.0194609	0.0178731	0.0374953	0.00858148	0.0201491	0.0190549	0.0196967	0	0
633	C	0.011121	0.0100412	0	0.0266064	0.00887784	0.0283661	0.0175116	0.00917347	0.0420027	0.0197941	0.00935979	0.00974374	0.0242053	0.0102659
636	C	0.0206868	0	0.0502715	0	0.0553316	0.0255319	0.182482	0.180379	0.184928	0.252359	0.161976	0.11425	0.0442968	0.102319
638	C	0.0397654	0.0180067	0.00982415	0.0235211	0.0385208	0.0250794	0.0390434	0.0509113	0.0375693	0.0671141	0.0102722	0.0315756	0	0.0115115
639	C	0	0	0.0194137	0.023076	0.0306021	0.0164853	0.0193293	0.0504337	0.0373065	0.0442821	0.0509424	0.0104102	0.021322	0.0228389
645	C	0.0457164	0.0504202	0.0278164	0.0107666	0.0218978	0.0079447	0.00973615	0.0203978	0.0187389	0.0223914	0.0102955	0	0.0138504	0.0118231
660	C	0.0753296	0.0864155	0.0668641	0.0888889	0.148943	0.0732959	0.0201715	0.0413565	0.0287136	0.0469318	0.0311139	0.022007	0.152683	0.0245038
663	C	0.0205529	0.018997	0	0.0240993	0.0641026	0.017191	0.0741683	0.0651678	0.06035	0.0500563	0.075594	0.0337724	0.0773036	0.0378406
674	C	0.011773	0.0552975	0.0238493	0.041006	0.0181554	0.0191296	0.0199621	0.01972	0.0189	0.0120163	0	0.0107342	0.0166834	0
676	C	0.0361489	0.0113947	0.0242895	0.0279759	0.0185408	0.039374	0.0388992	0.144467	0.0831793	0.117481	0.134875	0.0845219	0.0426439	0.133382
687	C	0	0.0364431	0.0266809	0.121451	0.0100847	0.0107504	0.069533	0.115022	0.111669	0.06888	0.100312	0.0727361	0.0378501	0.113863
695	C	0.138815	0.0498654	0	0.102289	0.0711631	0.0290473	0.144525	0.176464	0.0552914	0.14245	0.0845666	0.0901104	0.0533428	0.0788644
699	C	0.235607	0.134888	0.0665631	0.210084	0.102427	0.12476	0.255499	0.241679	0.179614	0.359574	0.147244	0.20087	0.140833	0.169492
703	C	0.02886	0.0269058	0.0103466	0.0117813	0.0371168	0.0433013	0.06509	0.0320307	0.0328479	0.124564	0.0204562	0.0537288	0.023622	0.0125235
707	C	0.028436	0.00883548	0.0413095	0.0116523	0.0296406	0	0	0.0219877	0.0113289	0	0	0.0108956	0.0304391	0.0126727
708	C	0.0182983	0.0256761	0.0200562	0	0.0289708	0	0	0	0.0449135	0	0.0104015	0.0107619	0.0218103	0.0750751
710	C	0	0.00835143	0	0	0.00711896	0.00805477	0	0.0108566	0.0224744	0	0	0	0.0141723	0
711	C	0	0	0	0.0309598	0.00681338	0.022633	0.0217226	0	0.0110926	0.0243605	0.0306748	0.0316256	0.026125	0.0359669
713	C	0.0167392	0.0156887	0.00932488	0	0.00678794	0.00752389	0.0109063	0	0.0111235	0	0.0102596	0	0.0130064	0.0120569
718	C	0	0.0156875	0.0093301	0	0	0	0	0.0434216	0	0.012273	0.0104998	0.0326619	0.0129216	0.0121729
722	C	0.00853825	0	0.00957304	0	0.00697058	0	0.0118469	0.0230309	0	0	0	0.0120337	0.0131987	0.0262226
723	C	0	0.0080457	0	0.01048	0	0	0.0237501	0.0232019	0.0248047	0.0387497	0.0225657	0.0484496	0.00659587	0
725	C	0	0	0	0.0104998	0.00701607	0	0	0.0118385	0	0.0260349	0	0	0	0
726	C	0	0	0	0	0.0140027	0	0	0.0119033	0.0126295	0.0258331	0.011566	0	0	0.0133958
728	C	0.00857339	0	0.00969086	0.0104987	0.0212149	0.00782656	0.0263817	0.0391952	0.054727	0.041534	0.0376742	0.0135263	0.00662515	0.0140233
729	C	0	0	0	0.010543	0	0	0.0408831	0.013468	0.0141223	0.0854701	0.0129584	0.0279057	0.0199814	0.0145391
730	C	0.0172801	0.0163265	0	0.0317058	0	0	0.0276243	0	0	0.0577201	0	0.0141183	0.00667735	0
733	C	0.0260598	0.0164285	0.00984058	0.0105977	0.0143503	0.00796876	0.0142369	0.0140805	0.0147514	0.0294247	0	0.01443	0	0.0150218
734	C	0.0441189	0.0417711	0.020028	0	0.00733138	0.00801603	0.062054	0.0157778	0.0328893	0.0469925	0.030409	0	0.0134871	0.0158253
735	C	0.0352827	0	0.0300933	0	0.0146951	0.00801796	0	0	0.0334113	0	0.0153139	0.0153752	0.013488	0.0789889
736	C	0.017762	0.0673571	0.0909091	0.19428	0	0	0.0164042	0.100284	0.105727	0.255836	0.0159642	0	0.0203252	0.0162549
738	C	0.0358359	0.0511073	0.040904	0.0543892	0.0150659	0.0163332	0.0172176	0.0174064	0	0.0165728	0.0339905	0.0503271	0.0205536	0.0503778
739	C	0.00898553	0.00854117	0	0.0218126	0	0	0	0.052789	0.0575926	0.0166667	0.0171615	0.0506415	0.00687002	0
740	C	0.0281373	0.00900657	0	0.0340716	0.00799936	0	0.0183993	0.0184638	0.0410004	0	0.0727405	0.0183621	0.022041	0.0182916
741	C	0.00940291	0.0180815	0.0329634	0	0	0	0	0	0.0408831	0	0.0179727	0.0181818	0.0221157	0
745	C	0.00966651	0.00935541	0	0.0234769	0	0.0182715	0	0.0571537	0.0421852	0.0178094	0.0563169	0.0760167	0.0230309	0.0561693
746	C	0	0.00941531	0.0345622	0	0.00846883	0.0368494	0	0.0579262	0.0426076	0	0.0570017	0.0193648	0.0154835	0
748	C	0.0304445	0.0197239	0.0121862	0.0613196	0.00896861	0.0196098	0.0394633	0.100422	0.133126	0.0182582	0.119	0.0618302	0.04148	0.0785083
750	C	0.0103498	0.0503677	0.0378788	0.0503018	0.037154	0.0401647	0.140562	0.0823723	0.201794	0.0184502	0.163265	0.105552	0.0337638	0.059312
753	C	0.103453	0.0384615	0.0321337	0.0311139	0.0372763	0.0264306	0.0479157	0.0723764	0.105402	0.0880475	0.124969	0.102907	0.0536711	0.0722892
755	C	0.0645474	0.0653595	0.0605449	0.0593589	0.0162946	0.112921	0.106638	0.105988	0.0289268	0.0730816	0.0558503	0.0859845	0.0742666	0.0791557
756	C	0.160944	0.0713649	0.0448632	0.0883392	0.0727537	0.0858811	0.0552029	0.0822594	0.0296209	0.0771208	0.0870322	0.116347	0.0258699	0.0265887
757	C	0.0581058	0.0783392	0.0490918	0.0486145	0.0398565	0	0.199147	0	0.0605694	0	0.0604047	0	0.0832639	0.0275634
758	C	0.0814664	0.0819001	0.154242	0.127943	0.0417101	0.077685	0.150905	0.201106	0.132345	0.0482509	0.184017	0.0585652	0.0847697	0.104822
759	C	0.286155	0.176289	0.0821468	0.135685	0.155417	0.2676	0.269278	0.195265	0.494405	0.232666	0.15456	0.148677	0.0893788	0.23753
761	C	1.1159	1.20266	1.52458	0.775434	1.29738	1.68884	1.58056	1.36448	0.883002	0.343092	1.67025	1.6139	2.19183	1.81319
766	C	0.10983	0.0855188	0	0.0675219	0.0543331	0	0.0223914	0	0	0	0.0445236	0	0.091191	0
768	C	0	0	0	0	0.0283046	0	0.0218436	0.0427625	0	0.020982	0.0221043	0.0619387	0.0193798	0.0269324
773	C	0.0200803	0.03803	0.0201776	0.0775394	0	0.0335345	0.0193498	0	0	0.01972	0	0	0.0399042	0.024667
781	C	0	0.0400213	0.0139997	0.0186254	0.0220726	0.0230894	0.0151286	0.0154202	0.0484418	0.0162285	0	0.0345483	0	0.0180245
782	C	0.0285878	0.0130668	0.0412145	0.0365831	0.0542005	0.0226578	0.0147254	0.0755629	0.031736	0	0.029347	0	0.0371506	0.106045
783	C	0.0271555	0	0.0260824	0.0865052	0.061608	0.0536942	0.0565691	0.0434972	0.0764877	0.0305344	0	0.0802311	0.0621614	0.0844595
785	C	0.0500814	0.0809155	0.0970992	0.0637857	0.076089	0.0597074	0.15715	0.107904	0.241649	0.126298	0.105001	0.191345	0.0655576	0.232522
790	C	0.0119746	0.0221141	0.0465712	0.0759417	0.0181094	0.0465766	0.0122699	0.0125423	0.0663394	0.0133387	0.0244858	0.0536481	0.0387027	0.0143246
791	C	0.023753	0.0109517	0.011558	0.0901036	0.00897263	0.00925754	0.0364078	0.0123993	0.0262123	0.0659718	0.0363372	0.0132626	0.015328	0.0141764
792	C	0.0342036	0.0105664	0.0112778	0.0434468	0.0263551	0.00909753	0.0235766	0.0120294	0.025468	0.0127812	0.0352775	0.0129132	0.0752502	0.027571
797	C	0	0.00813868	0.0173415	0.0333111	0.00672948	0	0	0.0103821	0.0225683	0.0113302	0	0	0.018432	0.0248447
803	C	0.0395382	0	0	0	0.00625978	0	0.00974564	0.010015	0.0108425	0.0107735	0.00998602	0.010819	0	0.011558
824	C	0.022007	0.0138093	0.0228833	0.0185925	0.0299886	0.0250141	0.00981547	0.0611746	0.0789711	0.042694	0	0.030842	0	0.0209336
829	C	0.0393329	0.0297	0.0737221	0.0497562	0.0593942	0.0642536	0.0210305	0.0545792	0.0359195	0.0344511	0.0339597	0.04385	0.066594	0.0333444
833	C	0.194013	0.160371	0.270704	0.151392	0.133953	0.146136	0.0545554	0.0794913	0.170628	0.153937	0.105103	0.150725	0.0947177	0.0810467
834	C	0.0935804	0.0542692	0.0711816	0.0589553	0.135707	0.0780369	0.0979752	0.0566958	0.121168	0.0354988	0.0582954	0.0696379	0.1027	0.0808875
835	C	0.065329	0.0631997	0.0508854	0.0468988	0.0879226	0.112069	0.0752365	0.0559222	0.107232	0.0233645	0.126743	0.0686028	0.0953499	0.0568569
839	C	0.0426985	0.0422297	0.0242277	0.0538141	0.0390472	0.0528374	0.0612745	0.0384123	0.122432	0.0264166	0.0409948	0.0979158	0.0817068	0.0540687
840	C	0.010491	0.0414379	0.0240385	0	0.0580271	0.115413	0.108591	0.0503081	0.0529872	0.0782677	0.0945052	0.207641	0.0449156	0.0664011
842	C	0.0520996	0.0722171	0.0721414	0.0527357	0.0774893	0.0313218	0.191182	0.222965	0.285455	0.192579	0.188375	0.248722	0.134505	0.183126
843	C	0.0949668	0.104493	0.12279	0.134499	0.128904	0.192143	0.307838	0.393217	0.305577	0.216588	0.225884	0.292235	0.173706	0.261472
850	C	0.0222767	0.0439947	0	0.0143225	0.0106474	0.0234769	0.0127616	0.0133387	0	0.0412428	0.0146007	0	0.0612996	0.014497
851	C	0.0328587	0.0761035	0.0127632	0.0141463	0.0105108	0.0231241	0.024777	0.0647836	0.0676041	0.107469	0.0429	0.0608735	0.0606367	0.0566974
853	C	0.0671066	0.0555803	0.0258632	0.0289603	0.0106394	0.0700117	0.568972	0.702638	0.719723	0.411466	0.644028	0.601852	0.0931099	0.475573
856	C	0.105374	0.0609013	0.0186116	0.12012	0.0317511	0	0.143431	0.226381	0.091659	0.123514	0.100385	0.160542	0.0143678	0.144115
876	C	0.0246518	0	0.0279369	0.0169119	0.041958	0.126203	0.0367062	0.102735	0.155682	0.0674491	0.0577784	0.130189	0.0392465	0.0538213
877	C	0.0238493	0.0340599	0.080032	0.0657354	0.040546	0.0302984	0.106157	0.112177	0.122504	0.026096	0.0275065	0.150867	0.0371517	0.0725163
879	C	0.011885	0.0113302	0.0266312	0.0164555	0.0404258	0.0453446	0.129047	0.123916	0.0847458	0.0781454	0.0816771	0.137431	0	0.120511
884	C	0.012364	0	0.0136968	0	0.0139218	0	0.0493888	0.0393494	0.0125266	0.0274236	0	0.0128222	0	0
900	C	0.0115234	0.0333704	0.0132223	0.047341	0.025468	0.0144907	0.111957	0.116713	0.0926569	0.0970403	0.0638081	0.0571298	0.0596801	0.0666593
905	C	0.0243576	0.0236128	0.0141283	0.0333056	0.0824289	0	0.034654	0.0958658	0.0361751	0.0253068	0.0524659	0.0348594	0.0257301	0.0453258
911	C	0.026713	0.0128025	0.0619867	0.10917	0.0459911	0.0360815	0.110963	0.0909298	0.145381	0.17117	0.138	0.103211	0.0428878	0.0783173
912	C	0.0950183	0.0390778	0.0790389	0.0184945	0.0157928	0.0556483	0.128908	0.186342	0.107562	0.107901	0.28001	0.157162	0.101332	0.109481
927	C	0.176523	0.367095	0.372825	0.470921	0.455959	0.478033	0.292581	0.259229	0.310217	0.162225	0.29274	0.278724	0.517539	0.217166
930	C	0.58273	0.504117	0.370752	0.613079	0.471601	0.535595	0.289566	0.227903	0.473171	0.233126	0.246471	0.252602	1.00227	0.303061
931	C	0.463193	0.270227	0.324489	0.512055	0.324489	0.481058	0.3663	0.316851	0.726348	0.363325	0.300752	0.422224	0.598086	0.507274
937	C	0.17316	0.0680041	0.120216	0.214316	0.192827	0.180723	0.0796654	0.0486713	0.0736716	0.0990862	0.0544484	0.0433182	0.284996	0.0208117
941	C	0	0.0312989	0	0.0198177	0.0358166	0.0189394	0	0	0	0	0.0321543	0.0106247	0.0466056	0
948	C	0.0424508	0.0409389	0.0154583	0.137433	0.0933707	0.0792644	0.0374567	0.0363537	0.0434631	0.0308578	0.0815079	0.0406628	0.0768246	0.0389257
950	C	0.0582411	0.111638	0.062588	0.0708341	0.112685	0.132231	0.0952562	0.101485	0.237634	0.0419859	0.113966	0.113204	0.235633	0.0492805
951	C	0.058072	0.0557414	0.062054	0.0706339	0.0162549	0.11599	0.112296	0.0907523	0.111263	0.113683	0.0407125	0.0821608	0.142653	0.0585766
953	C	0.161865	0.213838	0.0828363	0.195656	0.184434	0.092302	0.0865468	0.138927	0.103761	0.0747783	0.0415973	0.104134	0.190762	0.0395101
967	C	0.0125408	0.0356295	0.0127632	0.0767931	0.0441761	0.0279369	0	0.0246548	0.0615479	0.00926097	0.00924129	0.0189717	0.0376506	0
973	C	0.0578838	0.0875178	0.0232045	0.0280034	0.0133583	0.103748	0.0676933	0.0413121	0.0230982	0.0370748	0.0184638	0.0182815	0.053395	0.0173355
974	C	0.0751073	0.0305655	0.0217652	0.0389813	0.0249969	0.0743034	0.0411726	0.0240945	0.0443984	0.0542446	0.0357622	0.035727	0.0258131	0.042398
977	C	0.0843526	0.10954	0.0745236	0.190573	0.0732064	0.0980512	0.05758	0.0801989	0.0887377	0.0541565	0.0979694	0.0273823	0.0169362	0.0688646
979	C	0.0612432	0.0674439	0.0415024	0.134507	0.0353315	0.0355324	0.0161773	0.0317259	0.0508204	0.0265698	0.00881523	0.0091391	0.0497925	0.0172132
984	C	0.0347192	0.0579758	0.0091659	0.0211416	0.0201147	0.0723888	0.0146951	0.0220345	0.0608684	0.0653008	0.0328677	0.00854044	0.0594928	0.0637653
988	C	0.0691683	0.0746392	0.0276957	0.0637823	0.0702882	0.041318	0.0964106	0.0448397	0.0753786	0.0581202	0.0251889	0.0347433	0.0444346	0.0565109
989	C	0.0348979	0.0920656	0.0743564	0.0642261	0.101082	0.0730232	0.0448632	0.0527506	0.110246	0.0586854	0.0592016	0.0965166	0.0670941	0.0734095
994	C	0.00916086	0.0536913	0.02035	0.0112778	0.0438789	0.0456465	0.0075792	0.00765111	0.0354007	0.0168478	0.00876347	0.0278113	0.0240693	0.0336163
1000	C	0.0182299	0	0	0	0.0218269	0	0	0	0	0.00762544	0	0.00803471	0.00786102	0.0147243
1006	C	0.00870398	0.00849907	0.00980488	0	0.0210261	0.0216403	0.0130599	0.0131553	0.0121477	0.014555	0.0148832	0.0768935	0.00777242	0.0211238
1007	C	0	0.0165549	0.0191498	0	0.0102135	0	0.0191657	0.0321234	0.0118022	0.0285022	0.0145254	0.01496	0.0152138	0.00686389
1019	C	0.00870095	0	0	0.0109951	0.032113	0	0	0	0	0	0	0	0.00810241	0
1026	C	0.0173974	0.0259067	0.0403592	0.0109637	0.0213379	0.0111086	0.00626959	0.0191107	0	0.00702247	0.0213265	0	0.016721	0.00654065
1032	C	0.00940468	0.0187917	0.0112296	0.0357313	0.0115221	0.0497327	0.0397009	0.0273841	0.0721501	0.0301364	0.0385594	0.0917782	0	0.04265
1039	C	0.0353201	0.0441073	0.0104026	0.102041	0.0657102	0.0821211	0.0842023	0.0883392	0.0663967	0.111177	0.0985969	0.112376	0.0521558	0.0699545
1047	C	0.0421719	0.020139	0.011422	0.0402793	0.0128025	0.0538141	0.0564095	0.0146671	0.0214654	0.0161538	0.0161668	0.055582	0.0392657	0.0302092
1053	C	0.0101061	0.00974184	0.011152	0.0258833	0.0122249	0.0382848	0.0140766	0.00731689	0.0144865	0.0162193	0.0323311	0.0233064	0.00949668	0.0224888
1057	C	0	0.0100573	0	0	0.0125549	0.0129668	0.0528741	0.0791264	0.0157953	0.0176663	0.0879275	0.0334476	0	0.0407398
1063	C	0.0101502	0.0197122	0	0	0	0.0127747	0.00784375	0.0498256	0.0483131	0.0185718	0.028334	0.046292	0.0189018	0.0268025
1064	C	0.0100452	0.00974374	0.0113869	0	0.0242748	0.0383093	0.0155958	0.0494315	0.0560403	0.0646412	0.0375763	0.0368155	0	0.0356506
1067	C	0.0491352	0.0381207	0.0562303	0.0496155	0.0482393	0.0512033	0.203427	0.27395	0.162694	0.110396	0.113971	0.102497	0.0938791	0.107982
1074	C	0.0179517	0.00873362	0	0.0338066	0.0110705	0	0.0540708	0.0571522	0.0474158	0.0359551	0.0839866	0.0555607	0.0173641	0.0528216
1075	C	0.0177179	0	0.0101812	0.011121	0.0327082	0	0.0531269	0.0240906	0.1009	0.00881446	0.100686	0	0.0256783	0.0611888
1078	C	0.0180424	0	0.0104603	0	0.0111396	0	0.19419	0.17938	0.289879	0.16994	0.206004	0.224325	0	0.187161
1079	C	0	0	0.0109999	0.0237925	0	0.0125865	0.0612049	0.119244	0.0978996	0.0924784	0.0530617	0.0641643	0.0187582	0.0204645
1085	C	0.0176289	0.0172102	0.0206825	0.0110278	0.02148	0.0351083	0.0160862	0.0170271	0.0330961	0.0190006	0.00988045	0.0196464	0.0267118	0.0377145
1090	C	0	0.0651648	0.0336172	0.0479559	0.105374	0.0256377	0.0514007	0.109609	0.0791835	0.020028	0.181102	0.0105363	0.0301144	0.0593061
1091	C	0.028938	0.0468691	0.0113058	0.0483267	0.0472534	0.0128816	0.13617	0.236751	0.0787539	0.0696656	0.147773	0.0625717	0.0910102	0.029129
1094	C	0.27903	0.114871	0.140181	0.254351	0.13089	0.158914	0.275796	0.311777	0.304298	0.261837	0.209448	0.115207	0.134078	0.14757
1095	C	0.131296	0.0690767	0.127732	0.161125	0.126511	0.16776	0.09758	0.145319	0.107066	0.100536	0.0954426	0.117371	0.108421	0.0637078
1098	C	0.0874453	0.0724813	0.104415	0.123229	0.117336	0.0961538	0.151653	0.160617	0.0899281	0.126977	0.209928	0.097692	0.0382068	0.0876328
1103	C	0	0.053843	0	0	0	0.0709471	0.011029	0.0116891	0.0322789	0.0125266	0.0134192	0.0133958	0.042735	0.0119005
1106	C	0.0529731	0.0386498	0.047619	0	0.0450721	0.0168067	0.0634249	0.13515	0.0927644	0.0602627	0.0772499	0.0255689	0.0665956	0.102377
1109	C	0.027115	0.0265993	0.0161708	0.0504626	0.0463535	0.0172265	0.0759466	0.046184	0.0746189	0.0245218	0.0661463	0.0778614	0.0402522	0.0466418
1116	C	0	0	0	0	0.033162	0.0182782	0.0118427	0	0.0114233	0	0.0281571	0	0.0138947	0.0129132
1117	C	0.0135925	0	0.015625	0.0170853	0.0478011	0.0340774	0	0	0	0	0	0	0	0
1118	C	0	0.0133905	0	0.017135	0.032	0	0	0.0125676	0.0463876	0.0269469	0.0284212	0.0143534	0	0.0130651
1123	C	0.0578787	0.0284738	0	0.0185288	0.0508561	0.0351803	0.0129955	0	0.013245	0.0291673	0.0156593	0.0748951	0.0408775	0.0134844
1124	C	0.0582496	0.0143885	0.0163586	0.0370508	0.0336984	0.0170126	0.0392106	0.0564254	0.026738	0.0147016	0.0315358	0	0.0405844	0.013468
1125	C	0.0875146	0.0720357	0.112921	0.0741702	0.0666556	0.0491159	0.0372995	0.0540103	0.152847	0.0856042	0.0151126	0.0434657	0.118234	0.0129249
1127	C	0.166869	0.134811	0.23345	0.3485	0.20339	0.101027	0.187946	0.257209	0.165901	0.100835	0.120464	0.103199	0.162492	0.118219
1128	C	0.152975	0.211034	0.116881	0.215096	0.118584	0.0671817	0.320171	0.345224	0.528275	0.164745	0.228018	0.175747	0.0805694	0.122911
1132	C	0.11745	0.147638	0.0540541	0.105955	0.0542888	0.08967	0.0341219	0.0617284	0.0232477	0.0398248	0.0549677	0.0260756	0.115757	0.012012
1135	C	0.0175747	0	0.0187547	0	0.0190006	0	0.0716076	0.0129685	0.0365008	0	0.0146049	0.0268132	0.0298552	0.0248016
1138	C	0.016975	0.0499251	0.0362845	0.043122	0.0366838	0.0539665	0.0221558	0.0120424	0.056205	0.0131648	0.0543404	0.0248108	0.0432838	0.102857
1139	C	0.0624512	0.0305483	0.0167673	0.0998203	0.0340194	0.0473037	0.030804	0.0889779	0.0106157	0.0602918	0.0627904	0.0894254	0.0628694	0.0515517
1146	C	0	0.0152788	0	0.0203293	0	0	0	0	0	0	0	0	0.0247036	0.010513
1147	C	0.0141523	0	0	0.018457	0	0	0	0	0.0207061	0	0	0.0112221	0.0235101	0
1153	C	0.0112867	0.0110387	0.012566	0	0.0256871	0	0.00915835	0.009994	0	0.0322789	0.0114247	0.0105899	0	0.00980296
1162	C	0.0297442	0.0865301	0.0453001	0.103614	0.0462588	0.070373	0.0354108	0.00964972	0.0487662	0.0309215	0	0.0307314	0.110477	0.0190658
1163	C	0.0693207	0.0961723	0.0680195	0.0646496	0.0231992	0.0935126	0.0528588	0.0959693	0.077685	0.051398	0.0884369	0.0407539	0.0921065	0.0949127
1180	C	0.02766	0	0.0109063	0	0.0112562	0	0.0241507	0.0966438	0.0532292	0.0464296	0.0207297	0.0306216	0.00970874	0.0277162
1185	C	0.0457624	0.0450653	0.0551025	0.0240183	0	0.0117827	0.024079	0.026272	0.0451957	0	0	0.0101533	0.0682461	0
1191	C	0.0188395	0.00926441	0	0	0.011562	0	0.00886839	0.00976372	0	0.0100351	0	0.0117069	0.0203438	0
1205	C	0.0919794	0.0541028	0.0330469	0.036368	0.0440674	0.110294	0.111826	0.0411226	0.0980285	0.0314268	0.108017	0.0259471	0.0921848	0.138344
1213	C	0.0516316	0.0397812	0.0352941	0.0137344	0.0459664	0.0957052	0.0327869	0.0482684	0.0373181	0.0481522	0.0699594	0	0.0644399	0.0128999
1215	C	0.124365	0.0796972	0.104712	0.0969663	0.0801007	0.0476985	0.213052	0.258049	0.177417	0.221566	0.415294	0.107626	0.0855158	0.197576
1216	C	0.0573121	0.0550408	0.0211977	0.0771307	0.042328	0.0223589	0.0674764	0.0497451	0.0383044	0.074285	0.0435098	0.0463177	0.0617157	0.0928013
1218	C	0.00889363	0.0424556	0.00995223	0.0360924	0.0397022	0.0315856	0.0773054	0.0122309	0.0253293	0.0243043	0.0141483	0.0149678	0.0583204	0.01295
1219	C	0.0169147	0.0322321	0.0377965	0.0114338	0.0280978	0.0293945	0.0320718	0	0.012273	0.0235488	0.0406669	0.0287439	0.0274023	0.02531
1230	C	0.0158078	0	0.00909256	0.0106451	0.00876501	0	0	0	0	0.0122399	0.0143823	0	0.0087184	0.0397878
1231	C	0.0156299	0.01485	0.0270003	0.0105507	0.0086408	0	0	0	0.0137363	0	0	0	0.00859919	0
1234	C	0.00775434	0.0220848	0	0	0.0170547	0	0.0112322	0.0124938	0.0274801	0	0.0281889	0.0143596	0	0.0258598
1237	C	0.0155836	0.0221664	0	0.0104178	0.0254669	0.0182799	0.0363108	0.121376	0.0306138	0.0256871	0	0	0	0.0272851
1247	C	0.0165303	0.00787092	0.0283688	0.0220022	0	0.00980873	0.115959	0.113031	0.189538	0.134751	0.0525118	0.0338753	0.00920726	0.0771843
1249	C	0	0	0	0.0110363	0	0.0198314	0.104869	0.100351	0.0801282	0.0308404	0.0362976	0.0347222	0.00936154	0
1252	C	0.03314	0.0474458	0.0284576	0.0109987	0	0	0.0605694	0.0338467	0.0608766	0.0310366	0.0543971	0	0.028061	0
1254	C	0.0164123	0.0313701	0.093791	0.0327082	0.0274374	0	0.133235	0.0821693	0.117005	0.15108	0.210047	0.066302	0.0280479	0.0153681
1261	C	0	0.0381825	0.00925412	0.0106963	0.0458505	0	0.0397878	0	0.050813	0.0272591	0.029129	0.0146606	0.0490822	0.0141743
1262	C	0.00765345	0.00734484	0.00894935	0.0206676	0.0179067	0.00987069	0	0	0.0154775	0	0.0528891	0.0279486	0.0378896	0
1264	C	0	0.0146843	0.00895977	0.0206932	0.0359389	0.00998203	0.0244708	0.0268673	0.0152672	0.0634196	0.0782677	0.0561246	0.00951294	0.0271223
1266	C	0.0790139	0.0381156	0.111152	0.0536711	0.122376	0.105175	0.0924825	0.130001	0.165426	0.1638	0.210941	0.256604	0.12	0.162362
1267	C	0.0551094	0.0679194	0.0645876	0.0855981	0.0754361	0.161673	0.0400962	0.0435477	0.0986518	0.06888	0.0695314	0.12238	0.0830737	0.0303076
1268	C	0.0235849	0.0226091	0.0461212	0.0214179	0.0471876	0.0650407	0	0.0575209	0.0162338	0.108784	0.0831025	0.0757232	0.0729471	0.119814
1271	C	0.0494805	0.102645	0.136121	0.12428	0.221328	0.227713	0.0503905	0.0832639	0.0466563	0.0803428	0.0406284	0.0869691	0.203143	0.142167
1272	C	0.135307	0.161904	0.149626	0.149908	0.103498	0.271771	0.0249844	0.0137722	0.045676	0.0533333	0.0533618	0.114106	0.295017	0.0424268
1273	C	0.110855	0.114961	0.149895	0.197033	0.165085	0.241167	0.0238152	0.0132066	0.071449	0.038615	0	0.0405022	0.274093	0
1277	C	0.30623	0.141015	0.207773	0.225829	0.295457	0.399772	0.111321	0.0732332	0.0129955	0.108134	0.0577301	0.148258	0.374392	0.128123
1279	C	0.132434	0.149185	0.163733	0.173529	0.166412	0.251425	0.0555617	0.0241867	0.0513413	0.0476701	0.0468823	0.0637186	0.128719	0.0389156
1283	C	0.0123701	0.0356422	0.0963656	0.0808146	0.0419522	0.135067	0.108483	0.152761	0.0614628	0.115902	0.0670316	0.0845921	0.158365	0.152711
1292	C	0.0108272	0	0.0111657	0.0140726	0.0117702	0.01321	0.0206101	0.0338104	0.0232045	0.0221435	0.0316222	0.0112385	0	0.0124363
1303	C	0	0.00761035	0.00844096	0	0.0342936	0	0.0198059	0.021624	0.0111769	0.010661	0.0400842	0.0205233	0.0456288	0.0474947
1305	C	0.00790764	0.00739754	0	0.0102543	0	0.00933271	0.0978857	0.0747783	0.0770162	0.052532	0.0789032	0.0505663	0.0268649	0.0468988
1309	C	0.0225462	0	0.00786658	0.00976276	0.0156323	0.0180668	0.00960892	0	0	0.0102838	0.0193293	0.0296355	0.0262307	0
1311	C	0.015024	0	0.0235756	0.00976467	0.0234082	0.0631029	0.00960246	0.0104156	0.0107388	0.0205825	0	0	0.00873591	0
1316	C	0.0155594	0.0219459	0.0163066	0.0302816	0.0240134	0.0999455	0	0.032175	0.0110156	0.0105541	0.010007	0.0103455	0.0622333	0
1317	C	0.0386907	0.0145222	0.008088	0.0500601	0.0395726	0.0537105	0.0193199	0.0211439	0.0216427	0.0104286	0.00991965	0.010227	0.0525947	0.0353941
1331	C	0.0477034	0.057103	0.035246	0.105245	0.0818945	0.155219	0.117119	0.174305	0.0832639	0.0524714	0.0860914	0.0711165	0.0770119	0.091635
1336	C	0.0534093	0.0493205	0.0684718	0.0454821	0.0542463	0.10507	0.335358	0.232861	0.211494	0.270793	0.190713	0.175116	0.222762	0.867993
1337	C	0.0415258	0.0822414	0.0249392	0.0683112	0.0301732	0.0462443	0.457708	0.629108	0.276906	0.233781	0.0991572	0.0443538	0.205255	0.884521
1341	C	0.0118064	0.0109087	0.0187289	0.0382321	0.0303453	0.01953	0.0280348	0.0289184	0.0557414	0.0601142	0.0165248	0.026053	0.026824	0.036346
1355	C	0.0261472	0.0240732	0.0407194	0.0167813	0.0671186	0.0437924	0.106515	0.124478	0.116308	0.104952	0.0470662	0.0777672	0.0563341	0.140105
1363	C	0.0181017	0.0384088	0.0122309	0	0.0127202	0.00700967	0.00823316	0.00826241	0.0382731	0.027115	0.00737518	0.00820479	0.00646162	0.0221288
1373	C	0.0115627	0.00528346	0	0.0149667	0	0.00652699	0.0150399	0.0226998	0	0	0	0.00748447	0.0118533	0
1374	C	0.00572377	0.0104822	0.0116904	0.0148291	0.00606024	0.00647417	0.0213462	0	0	0.0158856	0.00653851	0.00729607	0	0.00955932
1380	C	0.0170474	0.0157803	0.00589692	0.0074129	0.0184638	0.0134066	0.0231374	0.00769764	0.0219266	0	0.0212269	0.00754091	0.0122489	0.0197922
1384	C	0.106001	0.159376	0.266683	0.107975	0.238556	0.159922	0.365631	0.439754	0.34651	0.330033	0.419619	0.493245	0.210258	0.332614
1389	C	0.0201315	0.0189454	0.00720098	0.0259538	0.00724165	0.0297133	0.0075683	0.0152416	0.0073524	0.0333973	0.021725	0.0368216	0.041917	0.0360068
1391	C	0.0201032	0.0630159	0.0144009	0.0172206	0.00721501	0.0374728	0.037515	0.0756086	0.0505744	0.0330907	0.0503887	0.0516415	0.035246	0.00893256
1395	C	0.00720461	0.0207727	0.0159693	0	0.0238095	0.0357302	0.0827609	0.0917202	0.0967742	0.0367782	0.0910747	0.181331	0.0323625	0.108685
1399	C	0.00759705	0.00732708	0.0168294	0.0295537	0.00826173	0	0	0.0508733	0.057995	0.0467421	0.0340397	0.0178651	0.0255471	0.0304538
1403	C	0	0	0	0	0.0082672	0.00951746	0.00848896	0	0.0583333	0.0376896	0.0341443	0.0267714	0	0.0102187
1410	C	0.0152172	0.0220832	0.0169779	0.0393236	0	0.0287632	0.0417362	0.0508949	0.0746207	0.0185598	0.0421905	0.0779964	0.0263366	0.0487377
1412	C	0.0233318	0.0151194	0.0351865	0.0403796	0.059671	0.0197589	0.0171792	0.061506	0.043122	0.028463	0.0695894	0.0352858	0.0543577	0.00983091
1415	C	0.074184	0.0834957	0.0876136	0.0492793	0.0318438	0.0506778	0.0292085	0.049412	0.0389788	0.0538967	0.0877107	0.0701966	0.0594955	0.0111995
1416	C	0.0390434	0.0295508	0.0467782	0.0918635	0.0672269	0.0640697	0.048676	0.049687	0.0387559	0.0216567	0.0390054	0.0603015	0.0971935	0.0336436
1417	C	0.0501706	0.0713194	0.10981	0.13541	0.0575705	0.181512	0.039557	0.070267	0.0391696	0.021913	0.0393198	0.0303951	0.149533	0.0569995
1418	C	0.0712323	0.0726292	0.161551	0.193263	0.0934689	0.198098	0.0990001	0.0301417	0.0491159	0.0990535	0.0787014	0.0809225	0.163831	0.034227
1419	C	0.174951	0.178496	0.315298	0.334635	0.329955	0.266383	0.128943	0.170546	0.127689	0.165271	0.108193	0.121359	0.227072	0.0910851
1423	C	0.0122805	0.0257136	0.078125	0.0483014	0.0266738	0.0596036	0.0199342	0.0603197	0.117693	0.0763525	0.0678492	0.0394984	0.112931	0.0452233
1427	C	0.0724725	0.101458	0.153186	0.157754	0.168919	0.116737	0.255805	0.257222	0.248139	0.136626	0.246189	0.21213	0.179881	0.188575
1430	C	0.0469759	0.0487983	0.0294118	0.0768403	0.0125219	0.0555864	0.00958589	0.0288101	0.00927902	0.0102239	0.055417	0.0562957	0.116792	0.0537403
1433	C	0.0118329	0.0244798	0	0.0611995	0	0.0705418	0.0198177	0.00976276	0	0.021126	0.0376294	0.0471342	0.0258833	0.0328048
1434	C	0.0354904	0.012161	0.0143369	0.0458365	0	0.042735	0	0	0.0197122	0	0.0291971	0.0289715	0.0518403	0
1435	C	0.0235488	0.0241371	0.0424929	0.0151883	0.0125016	0.113427	0.0311107	0.09113	0.0293485	0.0436538	0.0096637	0.0193293	0.0385902	0.0565483
1436	C	0.0241838	0.0367332	0.0142735	0.0154799	0.0250815	0.0566733	0.0726141	0.0406835	0.0490773	0.0328228	0.0582751	0.0978665	0.0252461	0.0227764
1437	C	0.0488222	0.0493462	0.0286944	0.0312891	0.0753864	0.0554708	0.0627615	0.0307251	0.0592534	0.0329924	0.0195179	0.0978953	0.0244081	0.0794371
1440	C	0.0368777	0	0	0	0.0123472	0.0131891	0.0205023	0	0.0193274	0	0.0286807	0.0094509	0.0343053	0
1443	C	0.024216	0	0.0276434	0	0.0121065	0	0	0	0	0	0	0	0	0
1453	C	0.1059	0.0584795	0.0762428	0.150517	0.110513	0.0989399	0.0230867	0.0111757	0.0526815	0.0236211	0.0309598	0.0942408	0.0467126	0.0872492
1460	C	0.0383926	0.0119062	0.0123977	0.0325733	0.0114416	0.011325	0	0.0303337	0.028566	0.0431639	0.0571102	0.029337	0.00964134	0.0344986
1464	C	0.0120308	0	0.0116036	0	0.0213106	0.0105341	0	0.00986972	0.0185563	0.010433	0.0186202	0	0.00913743	0
1467	C	0	0.010445	0.0109782	0.014518	0.0302115	0.00997805	0.0302725	0.019757	0.0186532	0.0314994	0.00935804	0.0100462	0	0.0117316
1468	C	0	0.020141	0.0212224	0.0139024	0.0195103	0.0194647	0	0.00982125	0.00925326	0.010408	0	0	0.00863782	0
1470	C	0.00972668	0.0179727	0.0484402	0	0.02693	0.00874738	0.0285605	0.00937295	0.00886368	0.0198491	0.0179501	0.0190913	0	0.0220507
1471	C	0.0286287	0.0264527	0.0666032	0.0245972	0.00874508	0.042398	0	0.00894694	0.00847242	0.00955384	0.00854044	0.0448189	0.046375	0.0104026
1472	C	0.00949577	0	0.0284468	0.0245188	0.0261006	0.0252823	0.00893336	0	0.0251889	0.00942152	0	0.0444998	0.0230769	0.0102743
1482	C	0.019305	0	0.0189358	0.0123747	0.00875503	0	0.182418	0.171277	0.199385	0.22665	0.176574	0.17191	0.0159553	0.0926784
1488	C	0	0.0093423	0.0201025	0.0268637	0	0.0277752	0.0271321	0.00893575	0.0175285	0.0408163	0.0178939	0.00920895	0.0175979	0.0331309
1493	C	0.0985222	0.10917	0.0320924	0.0721813	0.0778816	0.0583771	0.304597	0.331187	0.283437	0.304143	0.262776	0.177074	0.0284576	0.200669
1501	C	0	0.0301629	0.0110705	0.0290023	0.00985416	0.0307	0.0285252	0.0284145	0.0364232	0.0327869	0.0372995	0.047957	0.0209227	0
1502	C	0.0111882	0.0101595	0.0336022	0.0147471	0.0498008	0.0103284	0.0667748	0.0571646	0.0456579	0.032996	0.0186445	0	0	0.0479042
1503	C	0.0438789	0	0	0.0145836	0.0192326	0.0298003	0.118602	0.0635843	0.0350232	0.0209293	0.042452	0.0722609	0.0410678	0.124308
1512	C	0.0327118	0.0303674	0.056079	0.146028	0.0871924	0.0990589	0.0764088	0.0575209	0.0371092	0.0219322	0.0789197	0.0368868	0.113742	0
1513	C	0.0524824	0.106558	0.0639318	0.097861	0.0537105	0.109499	0.0931793	0.0746756	0.12664	0.106372	0.148466	0.129054	0.126435	0.0789444
1518	C	0.0611696	0.137378	0.0621736	0.0970403	0.15086	0.103972	0.0926498	0.0514192	0.0698812	0.0358295	0.0889917	0.0645637	0.0901002	0.0366569
1521	C	0.0507035	0.0359152	0	0.0503187	0.0210349	0.0649984	0	0.021046	0.041072	0.0122564	0.0360848	0.0279434	0.0705384	0.0250282
1523	C	0.0253004	0.0479386	0.0393236	0	0.0415326	0.0431313	0.0524934	0.0521921	0.0305126	0.0245549	0.0712441	0.0551015	0.0700525	0.0250031
1525	C	0.0493036	0.0820248	0.0757384	0.0638876	0.0598982	0.0415671	0.05113	0.0510256	0.12856	0.0603355	0.0780911	0.063194	0.100874	0
1527	C	0.0911458	0.123229	0.0655136	0.0838645	0.0722767	0.074381	0.153484	0.122499	0.294262	0.108985	0.0778816	0.0815809	0.161588	0.0862813
1529	C	0.078125	0.0442282	0.0150083	0.0401687	0.0814332	0.0485437	0.043483	0.129255	0.196647	0.117386	0.0904241	0.0770639	0.142709	0.0796073
1532	C	0.016247	0.0458225	0.0154703	0	0.0121892	0.0253775	0.0588928	0.0117165	0.0111532	0.0564972	0.0195484	0.052776	0.079766	0.0289143
1534	C	0.0484653	0.0454752	0	0.0413565	0.0242512	0	0.0237248	0.01178	0.0112183	0	0	0.0320444	0.0795334	0.014637
1538	C	0.0775074	0.0586424	0.0740521	0.0399202	0.0474271	0.0617208	0.239292	0.343969	0.239071	0.272753	0.167405	0.0864865	0.0128287	0.11725
1542	C	0.0482859	0.0766754	0.0931966	0.0830565	0.13487	0.0382702	0.0684463	0.203197	0.295858	0.144951	0.119138	0.135618	0.0656168	0.132253
1544	C	0	0.0156715	0	0	0.0370782	0.0258164	0.0844714	0.14039	0.0665868	0.01665	0.0553587	0.102054	0.0535117	0.0851934
1547	C	0.0160462	0.0308071	0	0.0206996	0.0120613	0.0253936	0	0	0.0278435	0	0.0226912	0	0.026462	0.0178827
1553	C	0.0167588	0.0323782	0.0325309	0.0435635	0	0	0.0170765	0.017334	0.0644745	0.0397377	0.0256115	0	0	0.0213311
1554	C	0	0.0160643	0	0.0216967	0.0125913	0.0256377	0.0337781	0.0511247	0.0477859	0.0196194	0.0378263	0.0622859	0.0134499	0.0209908
1557	C	0	0	0.0333834	0	0.0130668	0.01317	0.0350754	0.053802	0.149651	0.0410172	0	0.0161368	0.0137988	0.021796
1558	C	0.0174338	0	0.0335796	0	0.0263123	0.0262916	0	0	0.0672495	0	0.0131441	0	0	0.0219443
1559	C	0	0	0.0169377	0	0.0267451	0.0133369	0	0.0553506	0.0170561	0	0.0266134	0.0165453	0.0555093	0
1562	C	0.106213	0.0693361	0.0509684	0.141309	0.0675493	0.0394425	0.268721	0.183993	0.272063	0.104668	0.107411	0.180683	0.0534402	0.150247
1564	C	0.0183925	0.0361925	0.0707965	0.12133	0.114778	0.0281849	0.0405186	0.0628799	0.095057	0.0236016	0.0641746	0.0380156	0.0283648	0.0242601
1565	C	0.0545752	0.0178571	0.0350816	0.0479272	0.0989259	0.0552868	0.0402414	0.0623312	0.0188857	0.0233536	0.0316656	0.0942329	0.041917	0.0240906
1568	C	0.0178955	0.15737	0.0342349	0.0951701	0.0844595	0.0275406	0.0710732	0.0921319	0.0335627	0.0622407	0.0444576	0.105951	0.135336	0.0651183
1572	C	0.0508302	0.0810767	0.0479004	0.111607	0.178522	0.124241	0.0468238	0.0161264	0	0	0	0.0659739	0.119221	0
1574	C	0.0177494	0.0347162	0.0684229	0	0.106985	0.15444	0.0322685	0.0503271	0.0305904	0.0188715	0.0721397	0.0546349	0.0425532	0
1581	C	0	0.0178221	0	0	0.0144592	0.0298864	0	0	0.0149009	0.0180832	0	0	0	0.0201005
1582	C	0	0.0179662	0.0176866	0.0242072	0	0.0151584	0.0155231	0	0.0151217	0	0.0137287	0	0	0.0203832
1583	C	0.0180473	0.0179856	0	0.024108	0.0144238	0.0298998	0.0154345	0.0161108	0.0152114	0.0181258	0.0134138	0.0169233	0.0148148	0
1590	C	0.0195427	0	0	0	0	0	0	0.017322	0	0	0	0	0.0163292	0
1591	C	0	0	0	0	0	0	0	0	0.0171585	0	0	0	0.0329924	0
1592	C	0	0	0.0214087	0	0.0141683	0	0.0169808	0.0176647	0	0.0196967	0	0.0411184	0.0167673	0.0230044
1593	C	0.0202306	0.0630385	0	0	0.0283166	0.014941	0.135685	0.123479	0.0868206	0.11811	0.0795907	0.0271998	0.033456	0.06876
1597	C	0.0215193	0.0224568	0	0	0	0	0.0172622	0	0.0355809	0.0199601	0	0	0	0
1609	C	0.0218675	0.0694766	0.0712082	0.0293169	0.0287274	0.0294594	0.017449	0.0361991	0.0544465	0.0610501	0.0213265	0.0121714	0.0174125	0.112511
1618	C	0	0.0427168	0	0	0.0274801	0	0.0169578	0.0174734	0	0.059654	0	0.0108992	0	0.0444247
1626	C	0.0191168	0	0	0	0.0129116	0	0	0	0	0	0.00953834	0	0	0
1627	C	0	0	0.0191058	0	0.0120715	0	0	0.0182849	0.0364033	0	0.0279486	0.0214156	0	0
1628	C	0	0	0.0197006	0	0.0120846	0	0.059125	0.121926	0.082085	0.0703235	0.0287715	0.0767965	0.0308356	0.0268456
1629	C	0	0.0385431	0.0601926	0.048852	0.0120048	0.0472646	0.257124	0.421286	0.337762	0.201359	0.117578	0.101511	0.0309502	0.115407
1635	C	0.0189215	0	0	0.0250376	0	0	0.0236855	0	0.0258331	0.0274123	0.0201187	0.0333482	0	0.0295596
1644	C	0.0136017	0	0	0	0.00838645	0	0	0	0	0	0	0.011162	0.0118991	0
1645	C	0	0.0250973	0	0	0	0.0161121	0	0.0258398	0	0.0558191	0.00990589	0.0110791	0.011655	0
1646	C	0.0127033	0.0243516	0.0125031	0.0172771	0.0242033	0.0317536	0	0	0.0543478	0.0560224	0.019972	0.0560099	0.0230707	0.0678656
1655	C	0.0382848	0.0245068	0.0251414	0	0	0.00833056	0.0936988	0.213068	0.165837	0.0268962	0.114653	0.0383093	0.0119617	0.0633312
1660	C	0.0133654	0	0.0131062	0	0.0273848	0.0264294	0	0.0469263	0.022941	0.0272851	0.0489776	0.0271186	0.0255656	0.0944584
1666	C	0.0133174	0	0	0.0186916	0	0	0.0199402	0	0.0188893	0.0241371	0.0115327	0	0	0
1670	C	0.0135446	0.0129032	0	0.0191241	0.00925754	0.00893176	0.0187547	0.0735024	0.0521195	0	0.0116185	0.0254065	0	0.0225225
1682	C	0.0405789	0.0129668	0.0137005	0.0379867	0.0189591	0.00938615	0	0.0351741	0.0168862	0	0	0	0.0271961	0
1683	C	0.0135685	0	0.0413337	0	0.0190767	0.0378644	0.0173822	0.102145	0.0486697	0.065189	0.0484966	0.0375047	0.0137874	0
1684	C	0.013563	0.0390523	0.0138083	0	0	0.0474068	0.0168124	0.0490918	0.0308976	0.0840336	0.0473485	0.0122085	0.0276014	0
1687	C	0.0464684	0	0	0.0434783	0.0324394	0.032471	0.0685518	0.0331675	0.0311769	0.0437828	0.088239	0.0641437	0.0645786	0.0192976
1688	C	0.0157332	0.0150128	0	0.0220361	0.0109794	0.0331492	0.051116	0.03276	0.0153917	0	0.0760553	0.0647249	0.082672	0.0578258
1689	C	0	0.0303905	0.0163425	0	0.0111944	0.0113122	0.0167476	0.0641849	0	0.0642949	0.075748	0.0386299	0.0169837	0.0189753
1696	C	0	0.0176336	0.0192753	0	0.0277354	0	0.01734	0.0495622	0	0	0	0	0.0230044	0
1698	C	0	0	0	0.0279955	0.0154895	0.0554017	0	0.0170039	0	0	0.0152788	0.0154345	0.105569	0.0391236
1700	C	0.0932836	0.15989	0.103119	0.0658545	0.0583317	0.0650336	0.153715	0.0486776	0.0749176	0.0904159	0.106141	0.0609013	0.116857	0.0374392
1701	C	0.190321	0.374732	0.458295	0.455063	0.489739	0.418719	0.117568	0.064154	0.0593296	0.0447227	0.0925926	0.0760341	0.416266	0.0364033
1703	C	0.327576	0.293772	0.238257	0.163465	0.416992	0.435287	0.264026	0.189454	0.204499	0.329381	0.291277	0.241291	0.412371	0.0877655
1704	C	0.202102	0.384123	0.513875	0.0563698	0.488798	0.524828	0.151541	0.144023	0.0592066	0.0903138	0.221239	0.184843	0.166459	0
1705	C	1.01429	0.944334	1.35802	0.772698	1.41978	1.12867	0.221126	0.112903	0.148412	0.182607	0.256987	0.109187	0.997732	0.0702371
1708	C	0.126582	0.26936	0.364631	0.326531	0.270453	0.456621	0.0343584	0	0.0445038	0	0.134657	0.0327439	0.597177	0
1710	C	0	0.0686813	0.0951475	0	0.069541	0.407056	0.0169924	0	0.0147362	0	0	0	0.167411	0
1713	C	0.0665779	0	0.0980392	0	0	0	0	0	0.0151035	0	0	0	0.055991	0.0350385
1716	C	0	0	0.0986193	0.0819001	0.0713267	0.0703235	0	0.0174703	0.016276	0.0239521	0	0	0.0555864	0.0183925
1717	C	0	0.0681663	0	0.0816327	0.0706215	0.0702247	0.0363835	0	0.0482548	0	0.0177494	0	0.110193	0
1738	C	0.0616903	0	0.0727802	0	0	0	0.0241488	0.0236407	0.0226552	0	0.116632	0.0263574	0.058309	0
1739	C	0	0.0746826	0.078064	0.0904159	0.140056	0.19305	0.0245519	0.0481232	0.09168	0.0571265	0.1443	0.10846	0.121951	0.0541126
1740	C	0.1373	0.0988142	0.0512033	0.187617	0.191113	0	0.118963	0.0234412	0.132567	0.0804505	0.161142	0.136649	0.116189	0.0257334
1742	C	0.609756	0.958628	0.769231	1.69811	0.869565	0.927441	0.648379	0.977278	0.924855	0.912611	0.987714	1.42126	0.625978	1.15334
1747	C	0	0	0	0	0	0	0	0.0297089	0.0288434	0.0638162	0.0290951	0.0353607	0.04158	0.0620732
1750	C	0	0	0	0	0.0513611	0	0.0323415	0	0	0	0.0631313	0	0.0412201	0
1751	C	0	0	0	0	0	0.117578	0	0.0661813	0.0322269	0.034965	0	0.0386698	0	0
1752	C	0	0	0	0	0	0	0.0330797	0.0673854	0.0654664	0.0355999	0.0981997	0.120337	0	0
1753	C	0	0	0.10543	0.0686342	0	0	0.033456	0.135181	0.0658979	0.107258	0.164799	0.163199	0	0.0346021
1755	C	0	0	0	0.0687758	0	0.0582072	0.131579	0.0657895	0.0318167	0.0346861	0.0321234	0.0407498	0	0
1756	C	0.0503018	0	0	0	0	0	0.0331785	0.0665779	0.0322373	0.0700035	0.0323206	0.0843526	0	0.0347826
1762	C	0	0	0	0	0	0	0	0	0	0.0396825	0.035137	0	0	0
1765	C	0	0	0	0	0	0	0.0790202	0.0378788	0.0728067	0	0	0	0	0.0429923
1766	C	0	0	0	0	0	0	0.036075	0	0	0	0	0	0	0
1767	C	0.0508388	0.0540541	0	0	0	0	0	0	0	0	0	0.0474834	0.0423729	0.0234522
1769	C	0	0	0	0	0	0	0.0532056	0	0.023546	0	0	0	0	0.0463822
1772	C	0	0	0	0	0	0	0	0	0.033456	0	0	0.0355999	0	0.0747803
1773	C	0	0	0	0	0	0	0	0.0530223	0.0163854	0.0226244	0.034825	0.0528541	0	0.0369276
1774	C	0	0	0	0	0	0	0	0	0	0.022041	0	0	0	0
1778	C	0	0	0	0	0	0	0.01554	0.043802	0.0271887	0.0199045	0.0303352	0	0.0369686	0.0308356
1783	C	0	0	0	0	0	0	0	0	0.0131562	0	0.0148743	0.0444444	0.0368868	0
1785	C	0	0	0	0	0	0	0.0143164	0	0	0.0182448	0	0	0	0
1794	C	0	0	0	0	0.173385	0	0.0138966	0.0131303	0	0.0178444	0.013637	0	0.0367647	0
1798	C	0	0	0	0	0	0	0	0	0	0	0.0273486	0.0138293	0	0.0143041
1802	C	0	0	0	0	0.0444444	0	0	0	0	0	0	0	0	0
1807	C	0	0	0	0	0.0438212	0	0.0136818	0.0129182	0	0	0	0	0	0
1811	C	0	0	0.0469263	0.0632111	0	0	0	0.0129938	0	0.0177305	0.0137268	0	0	0
1828	C	0.0573394	0.0593472	0.056338	0	0.103681	0	0.059976	0.039604	0.109389	0	0.0213493	0.0509424	0	0.0761228
1833	C	0	0	0	0	0.0727273	0	0.18018	0.281591	0.19802	0.192585	0.250417	0.143678	0.146199	0.12685
1841	C	0	0.77821	0.680272	0.413223	0.257069	0.78125	1.17878	0.868726	0.0884173	0.21254	0.693756	0.512821	1.40449	0.673854
1842	C	0.420168	0	0	0	0	0.813008	0.30426	0.397219	0.182149	0.109051	0	0	0.288184	0
1852	C	3.0303	0	0	0	0	1.13636	0.877193	0	0.790514	0	0	0	0.735294	0
1853	C	1.5625	0	0	0	0	1.13636	0	0	0	0	0	0	0	0
1856	C	0	0	0	0	0	0	0	0	0	0	0	0	0	0
1865	C	0	0	0	0	0	0	11.3636	0	0	0	0	0	0	2.38095

## Sheet: C>T
18s location	forward strand reference base	WT NaBH4 2-NH2-d-ATP HIV	75% WT NaBH4 2-NH2-d-ATP HIV	50% WT NaBH4 2-NH2-d-ATP HIV	25% WT NaBH4 2-NH2-d-ATP HIV	WT untreated 2-NH2-d-ATP HIV	WT untreated dNTPs HIV	WT NaBH4 d2-NH2-d-ATP SSIV	75% WT NaBH4 dNH2-ATP SSIV	50% WT NaBH4 2-NH2-d-ATP SSIV	25% WT NaBH4 2-NH2-d-ATP SSIV	WT untreated 2-NH2-d-ATP SSIV	WT untreated dNTPs SSIV	WT NaBH4 dNTPs HIV	WT NaBH4 dNTPs SSIV
3	C	1.96078	3.07692	1.36986	3.50877	5.74713	0	0	0	0	0	3.7037	0	1.23457	0
4	C	0	1.86335	2.29885	0	1.5625	0	6.66667	0	2.24719	0	1.42857	0	0	0
13	C	0.904977	0.931099	1.66976	2.67857	0.70922	1.26183	0.742574	0.402576	0.27248	0.55991	0.448029	0.384986	2.06718	1.01925
14	C	0.722543	0.385109	0.514801	1.2024	0.579374	0	0.389864	0.292312	0.339905	0.39032	0.487329	0.274098	0.191205	0.535045
17	C	0.17452	0.596252	0.587741	0.486618	0.537634	0.30303	0.401606	0.492341	0.281124	0.242131	0.114329	0.304044	0.138889	0.199734
18	C	0.150489	0.301432	0.378215	0.430108	0.542005	0.273973	0.136263	0.0982479	0.159011	0.0577367	0.0842318	0.113572	0.259067	0.152439
24	C	0.229885	0.358209	0.123305	0.42517	0.111173	0.0972763	0.212766	0.206811	0.188488	0.170173	0.0280348	0	0.0914077	0.19861
30	C	0.828057	0.569358	0.977729	0.297841	0.580552	0.0646831	0.172157	0.305361	0.253899	0.188869	0.0232315	0.0492045	0.188324	0.167476
35	C	0.505282	0.197433	0.474183	0.97561	0.233427	0.179748	0.229508	0.215703	0.218844	0.203106	0.0110717	0.0305111	0.17192	0.108426
37	C	0.151688	0.252313	0.231696	0.0598444	0.120627	0	0.10988	0.0886132	0.0876595	0.0987849	0.00908018	0	0.190024	0.0578771
48	C	0.840336	0.932039	0.746269	1.08992	0.563486	0.0935454	0.127307	0.227148	0.138241	0.222241	0.0160681	0.00979816	0.174672	0.221752
49	C	0.278843	0.306748	0.218723	0.107875	0.0747664	0	0.194795	0.223266	0.152426	0.226225	0	0.0192178	0.0432339	0.118378
53	C	0.435511	0.333333	0.384615	0.104004	0.181225	0.0446828	0.23162	0.185281	0.137786	0.280336	0.0457213	0.00913159	0.083091	0.131098
58	C	0.56908	0.595655	0.778051	0.737101	0.382343	0	0.199416	0.191354	0.100744	0.144103	0.0217817	0.017319	0.157791	0.0446269
65	C	0.315956	0.282087	0.509554	0.540806	0.108303	0.296485	0.167166	0.256321	0.212847	0.332275	0.0568101	0	0.355591	0.0783563
67	C	0.669216	0.501792	0.522648	0.841584	0.0738552	0.0849257	0.221776	0.254786	0.189308	0.175992	0.0353307	0.0251067	0.240867	0.121128
69	C	0.890937	0.587422	0.506116	0.235849	0.176991	0.12285	0.213955	0.266557	0.233486	0.291481	0.0351025	0.0166251	0.421295	0.077406
72	C	1.35411	0.794326	1.1612	0.742115	0.949094	0.255509	0.372856	0.32919	0.316549	0.30745	0.0686389	0.0642725	0.633293	0.234663
73	C	0.539291	0.749712	0.619621	0.551471	0.23015	0.0659848	0.215548	0.264323	0.193723	0.297708	0.0360881	0.0258376	0.486618	0.150923
78	C	0.759124	0.519987	0.480962	0.328407	0.205409	0.210011	0.2003	0.254168	0.176854	0.288356	0.0203728	0	0.0953289	0.117221
86	C	0.274411	0.379459	0.263852	0.493259	0.19084	0.143431	0.186143	0.219161	0.183634	0.223237	0.0306529	0.0101667	0.189959	0.095057
89	C	0.327667	0.44405	0.408998	0.174876	0.21398	0	0.273081	0.190315	0.311814	0.254531	0.0821777	0.0720981	0.0775194	0.318269
96	C	0.595447	0.473847	0.605034	0.687117	0.314342	0.0524109	0.251803	0.29606	0.331248	0.324992	0.043692	0.023015	0.268745	0.191939
98	C	0.501792	0.423651	0.565527	0.249314	0.138944	0.0277085	0.246711	0.181818	0.186166	0.21443	0.0395465	0	0.0286533	0.0926212
106	C	0.197	0.30931	0.143855	0.23085	0.145091	0.0222272	0.294018	0.137868	0.133544	0.244473	0.010725	0	0.0924855	0.101807
117	C	0.441806	0.471895	0.529487	0.454201	0.382653	0.0396197	0.120416	0.0651324	0.083632	0.103114	0	0.0132802	0.0655022	0.115666
118	C	0.283976	0.121902	0.214056	0.258732	0.0550358	0	0.256355	0.157812	0.162583	0.190247	0.0781097	0	0.0429185	0.16252
125	C	0.441212	0.555086	0.186567	0.588813	0.096073	0.104058	0.275174	0.238338	0.13459	0.294712	0.0404596	0.0110914	0.0931272	0.160325
127	C	0.798631	0.967296	0.691176	1.07527	0.504529	0.200267	0.290159	0.200064	0.262538	0.280809	0.015259	0.0106157	0.341973	0.164406
129	C	0.511015	0.423438	0.219812	0.420626	0.171272	0	0.193588	0.192619	0.122495	0.255082	0.0368596	0.0207061	0.1608	0.209247
131	C	0.759612	0.881006	0.618215	0.672538	0.443822	0.139203	0.318348	0.255201	0.254096	0.28057	0.0521105	0.0421763	0.31464	0.162025
133	C	0.757845	0.6819	0.551217	0.91131	0.439952	0.0355745	0.495164	0.471152	0.377989	0.659682	0.0447294	0.0210993	0.280479	0.160272
134	C	0.476417	0.505841	0.619387	0.493097	0.322851	0.197345	0.209221	0.271045	0.176476	0.27363	0.0149813	0	0.244637	0.231645
136	C	0.887184	0.532752	0.623441	0.678134	0.337025	0	0.231125	0.26178	0.168037	0.280549	0.0374364	0	0.321726	0.221685
138	C	0.563752	0.679447	0.43839	0.513585	0.253195	0.036324	0.28545	0.393579	0.239702	0.2818	0.045106	0	0.11396	0.172887
139	C	0.637402	0.620438	0.454831	0.780601	0.459381	0.0182749	0.193648	0.201379	0.196026	0.259781	0.0226518	0.0108342	0.190767	0.184615
142	C	0.463195	0.35479	0.274947	0.309598	0.239024	0.019459	0.285013	0.159185	0.201909	0.297979	0.0389924	0.0231803	0.138504	0.140328
151	C	0.420967	0.457254	0.380228	0.371264	0.261312	0.043956	0.192462	0.163159	0.160529	0.181578	0.0160591	0.0122699	0.149797	0.194842
162	C	0.457227	0.354282	0.504579	0.371364	0.241692	0.0453309	0.196017	0.096494	0.148093	0.161606	0.0320436	0	0.212064	0.100942
168	C	0.346308	0.562746	0.368421	0.559306	0.296976	0.119847	0.204233	0.196556	0.103381	0.175348	0.0186185	0.0363636	0.287431	0.0754717
174	C	0.22127	0.171355	0.199131	0.153433	0.0837054	0.049505	0.212589	0.271104	0.132437	0.176513	0.02804	0	0.0778614	0.0610575
178	C	0.539829	0.702673	0.458392	0.593739	0.537931	0.0462535	0.231234	0.206519	0.231683	0.232019	0.0814038	0.099272	0.171863	0.183971
179	C	0.291804	0.410379	0.326517	0.277537	0.119904	0.090009	0.372456	0.295601	0.277675	0.314651	0.0435502	0.0859199	0.436469	0.294551
182	C	0.37068	0.449046	0.398605	0.530461	0.100616	0.187032	0.351965	0.372881	0.351463	0.309298	0.151541	0.173151	0.475543	0.284402
186	C	0.597319	0.642654	0.485437	0.585973	0.314136	0.527072	0.245724	0.269031	0.309119	0.227609	0.107991	0.166352	0.765172	0.215234
188	C	0.486654	0.603774	0.401965	0.571534	0.565645	0.26178	0.163215	0.206207	0.215243	0.18797	0.0502311	0	0.327869	0.0976562
192	C	0.371581	0.406382	0.507278	0.441745	0.279947	0.0700771	0.0960512	0.128797	0.111573	0.0738916	0.0312598	0.0225759	0.168472	0.0377311
193	C	0.255485	0.378616	0.487157	0.578574	0.237002	0.164512	0.0650971	0.17433	0.25565	0.391315	0.0210504	0.0113882	0.120395	0.0385307
194	C	0.570828	0.483165	0.418594	0.594023	0.590232	0.0467836	0.0764109	0.0219082	0.0205634	0.0507614	0.0317292	0	0.0715478	0.0516929
195	C	0.239557	0.195606	0.196549	0.425532	0.235433	0.0233318	0.0654522	0.0656599	0.102417	0.0888889	0.0316723	0	0.118259	0.0258031
196	C	0.266469	0.253353	0.299786	0.257258	0.130662	0.0224467	0.0985653	0.0660793	0.0305499	0.0763456	0.0420433	0.0555617	0.130947	0.0127779
199	C	0.209908	0.387382	0.148782	0.308219	0.173033	0	0.294824	0.262066	0.161437	0.291397	0.0623053	0.0437685	0.248471	0.215463
201	C	0.333023	0.548374	0.287697	0.441321	0.0752729	0.0778816	0.334593	0.344197	0.364604	0.362047	0.0613622	0.0540716	0.353669	0.213246
212	C	0.334737	0.279503	0.186197	0.401284	0.210928	0.0608365	0.278097	0.256776	0.242353	0.313796	0.0900009	0.00993542	0.167052	0.139066
216	C	0.269804	0.309246	0.318082	0.447074	0.18169	0.0296252	0.394617	0.307631	0.411241	0.314612	0.130281	0	0.277577	0.131218
223	C	0.281721	0.30202	0.315572	0.249475	0.145168	0.0291036	0.147524	0.288928	0.130776	0.204893	0.0580608	0.0106067	0.110436	0.199129
228	C	0.341016	0.286697	0.249213	0.283206	0.153284	0.0146929	0.221166	0.133185	0.186933	0.141316	0.106918	0.0340329	0.213607	0.100263
233	C	0.766651	0.650255	0.67389	0.661871	0.571361	0.0890736	0.33557	0.246914	0.28463	0.262467	0.0540599	0.0904977	0.107101	0.251541
234	C	0.341463	0.306279	0.225854	0.249121	0.143592	0.0759994	0.172533	0.172354	0.183115	0.202895	0.0771775	0.0591786	0.10917	0.213904
237	C	0.565597	0.614803	0.59579	0.503629	0.419815	0.0457108	0.241546	0.252699	0.251524	0.271113	0.120297	0.059004	0.139605	0.0796601
238	C	0.434172	0.328987	0.295898	0.385386	0.207697	0.0790764	0.280112	0.14579	0.210463	0.214316	0.0918379	0.0767558	0.241944	0.129366
239	C	0.236469	0.199501	0.108637	0.347936	0.0994283	0.0479616	0.183936	0.146556	0.121827	0.272989	0.0115982	0.0380662	0.132086	0.0708316
243	C	0.363747	0.312145	0.230814	0.387812	0.151599	0.0524384	0.217598	0.187041	0.110668	0.175467	0.0878073	0.0953549	0.16116	0.241546
246	C	0.486539	0.591716	0.318037	0.435041	0.427099	0.109131	0.142613	0.181488	0.0814048	0.168294	0.0263678	0.0280938	0.144963	0.110515
247	C	0.210834	0.258634	0.272603	0.278109	0.220848	0.0359712	0.138889	0.0953159	0.0456673	0.0990426	0	0.0679163	0.0721761	0.108376
248	C	0.213605	0.321052	0.121359	0.323887	0.206825	0.0359131	0.081666	0.0133583	0.0340716	0.113452	0.0124984	0	0.0737463	0.0603956
249	C	0.410937	0.472534	0.342058	0.413386	0.529403	0.0522466	0.139754	0.0876644	0.0861234	0.0911854	0.0466581	0.0617284	0.0963972	0.113042
251	C	0.139838	0.421941	0.338285	0.329521	0.197017	0.0341239	0.134179	0.0360317	0.0622278	0.189449	0.100223	0.012012	0.0833135	0.0137099
253	C	0.550692	0.517516	0.583901	0.544337	0.332226	0.141621	0.124448	0.0780031	0.067379	0.0672043	0.0515889	0	0.0910851	0.0513084
254	C	0.196574	0.0924336	0.0832524	0.0872448	0.0379795	0.01554	0.0675371	0.0444296	0.0861244	0.0935579	0.0102796	0.0337079	0.0679425	0.0638896
257	C	0.467547	0.739396	0.428236	0.308748	0.310212	0.0308594	0.0776398	0.0219154	0.0568451	0.144566	0.0306686	0	0.057971	0
258	C	0.55383	0.572592	0.58663	0.420805	0.36523	0.0304275	0.120535	0.0756348	0.0842539	0.181747	0.0506483	0.0452899	0.0574647	0.0752351
259	C	0.512821	0.555188	0.451369	0.417973	0.395207	0.0472739	0.24136	0.0758808	0.187882	0.194881	0.0304847	0.022779	0.132642	0.0752162
260	C	0.252461	0.325654	0.262503	0.308341	0.0943841	0.0451535	0.179913	0.167662	0.137074	0.101036	0.0297265	0.0111396	0.106724	0.0606575
263	C	0.202276	0.292326	0.230382	0.359595	0.277946	0.124805	0.146551	0.0932256	0.100945	0.111885	0.0689044	0.0444642	0.0627904	0.120744
264	C	0.0900206	0.1	0.106351	0.116861	0.0628457	0.0328515	0.0739098	0.0938282	0.0839083	0.0869998	0.029824	0.0225048	0.0668092	0
271	C	0.383485	0.439698	0.44843	0.512312	0.113279	0.0827815	0.428154	0.379021	0.305273	0.457831	0.107223	0.0757002	0.262721	0.176222
275	C	0.193024	0.164046	0.172295	0.161522	0.0275482	0.0347403	0.147862	0.146002	0.145183	0.204892	0.106428	0.0340677	0.118694	0.157844
277	C	0.525225	0.633347	0.472772	0.519713	0.538748	0.0530316	0.147359	0.167973	0.114369	0.127845	0.0747544	0.0462428	0.198686	0.111097
278	C	0.163288	0.176439	0.120482	0.0880747	0.0135796	0.0344471	0.188366	0.164096	0.131446	0.100364	0.0416797	0.0792214	0.104353	0.16943
281	C	0.425707	0.261168	0.320228	0.177968	0.178694	0.0536961	0.2664	0.250136	0.232746	0.22562	0.114943	0.0921234	0.343107	0.20005
284	C	0.342466	0.438777	0.42735	0.389243	0.314422	0.123806	0.587583	0.705755	0.628039	0.725181	0.545703	0.0229516	0.288403	0.286926
293	C	0.458993	0.57334	0.423537	0.562676	0.346098	0.0587889	0.20429	0.149671	0.161002	0.19529	0.00942685	0	0.204866	0.123259
295	C	0.370246	0.45369	0.307994	0.394621	0.184124	0.0538866	0.30398	0.289287	0.220059	0.411567	0.0265018	0.0103061	0.224507	0.181591
303	C	0.196372	0.147984	0.203398	0.29105	0.134476	0	0.241136	0.221356	0.178775	0.167645	0.101523	0.020002	0.117912	0.1578
304	C	0.385154	0.304533	0.29532	0.261275	0.14466	0.0697512	0.222222	0.239071	0.173242	0.229495	0.0574383	0.0393314	0.124159	0.186342
306	C	0.462012	0.476474	0.424486	0.465322	0.134739	0.150393	0.528559	0.562037	0.38522	0.592534	0.377142	0.366918	0.298507	0.229885
310	C	0.578967	0.567864	0.461333	0.618782	0.313427	0.0622278	0.328502	0.279034	0.190592	0.177976	0.140991	0.0806637	0.302081	0.212314
311	C	0.0189233	0.0369447	0.0358337	0.012108	0.025134	0.0486559	0.0186012	0.0557414	0.0248488	0.0108519	0.0449924	0.0221312	0.0109926	0.0604449
315	C	0.282646	0.273523	0.211292	0.143868	0.117617	0.0121847	0.172743	0.144209	0.195743	0.248005	0.070553	0.0645995	0.119813	0.107978
317	C	0.380159	0.331965	0.406137	0.402253	0.154497	0.0349895	0.212766	0.14024	0.127449	0.167119	0.0605275	0.0315358	0.176385	0.116537
319	C	0.179404	0.250237	0.190498	0.341491	0.120812	0.0462	0.237008	0.269121	0.181288	0.268651	0.0769362	0.0722469	0.184464	0.136815
321	C	0.584738	0.695554	0.521023	0.693093	0.553203	0.0484496	0.190961	0.0990723	0.114025	0.15949	0.017632	0.0422297	0.201186	0.0707631
322	C	0.225358	0.245793	0.158074	0.220157	0.156169	0.0121197	0.0911411	0.126537	0.0651413	0.106474	0.00882768	0	0.115814	0.0588305
323	C	0.30569	0.303749	0.254978	0.391437	0.251104	0.0242777	0.109519	0.0633771	0.0568921	0.0747544	0.0440645	0.0316222	0.0839719	0.105808
324	C	0.438297	0.437902	0.446796	0.456128	0.219446	0.0239206	0.235103	0.232517	0.231685	0.233397	0.0347524	0.0622213	0.184332	0.197743
325	C	0.25351	0.410218	0.281129	0.251557	0.18556	0.0837822	0.189309	0.160299	0.111244	0.179951	0.00864977	0	0.122737	0.208914
326	C	0.244858	0.1965	0.12873	0.131989	0.0760713	0.0239636	0.152125	0.132826	0.094697	0.0950771	0.034382	0.0408455	0.101947	0.103734
331	C	0.265696	0.187952	0.117082	0.204278	0.110629	0.0484731	0.239915	0.175855	0.0861866	0.20074	0.0430849	0.0208008	0.112256	0.0582479
334	C	0.205379	0.299345	0.198413	0.215569	0.119037	0.0726832	0.146036	0.136869	0.0999769	0.182537	0.0591416	0.0408372	0.142813	0.067484
337	C	0.235988	0.169444	0.281129	0.314048	0.179748	0.182949	0.163949	0.103146	0.170279	0.233811	0.0424917	0.010268	0.143693	0.146429
340	C	0.58439	0.652791	0.433611	0.475958	0.37069	0.0622665	0.137092	0.119668	0.154048	0.231249	0.0253143	0.0310784	0.0730765	0.14592
341	C	0.267804	0.378967	0.2925	0.439507	0.198464	0.0992063	0.102494	0.127943	0.0924927	0.160853	0.0252908	0.0205867	0.115461	0.0893755
342	C	0.197941	0.142086	0.0934579	0.219673	0.0861995	0.0371563	0.102189	0.110572	0.0691244	0.15021	0.0336304	0	0.042008	0.111495
346	C	0.46477	0.259485	0.186526	0.287786	0.124327	0.0478927	0.212749	0.220022	0.113331	0.20284	0.0547559	0.0190132	0.19972	0.0805558
350	C	0.346754	0.241613	0.20628	0.203422	0.141305	0.0380759	0.226336	0.225934	0.240472	0.237801	0.0644071	0.0289771	0.149286	0.267078
353	C	0.369269	0.378863	0.419132	0.532927	0.225711	0.0145773	0.461736	0.350907	0.332021	0.413891	0.1544	0.0725238	0.274365	0.283009
356	C	0.760895	0.693813	0.564254	0.725256	0.443459	0.0838082	0.190567	0.170681	0.142283	0.233515	0.0478286	0	0.0946714	0.118977
357	C	0.450067	0.311713	0.310467	0.330231	0.186012	0.0175963	0.29759	0.21722	0.155723	0.299815	0.0198472	0	0.169611	0.122354
358	C	0.439841	0.362622	0.391756	0.296219	0.330033	0.0433557	0.192123	0.128301	0.13903	0.246063	0.0214731	0.0798191	0.293255	0.131475
362	C	0.284212	0.238262	0.406504	0.328549	0.0452899	0.0216873	0.221752	0.149358	0.155952	0.195357	0.0200441	0.024567	0.128535	0.1213
365	C	0.39968	0.388259	0.333148	0.364543	0.166528	0.068306	0.519288	0.614647	0.558559	0.59193	0.44555	0.214755	0.0857045	0.263852
369	C	0.285408	0.242761	0.241206	0.324114	0.0556793	0.0750188	0.257649	0.147617	0.174809	0.281242	0.0315856	0.0382995	0.0551978	0.151918
379	C	0.318327	0.277778	0.291391	0.30278	0.0719424	0	0.204229	0.285782	0.188778	0.200508	0.0477441	0.0144634	0.159417	0.321903
381	C	0.49785	0.529466	0.662252	0.709995	0.262092	0	0.17741	0.164512	0.166511	0.330513	0.023499	0.0572738	0.179654	0.193745
382	C	0.272913	0.255339	0.268745	0.356849	0.0971581	0	0.236827	0.234412	0.104254	0.31746	0.0352444	0.0143349	0.295253	0.110757
386	C	0.797408	0.634921	0.639591	0.67464	0.578871	0.0794913	0.240537	0.100705	0.181324	0.293624	0.0508324	0	0.100934	0.161884
387	C	0.349563	0.2917	0.288092	0.369686	0.145054	0.0391696	0.31407	0.211917	0.0783699	0.18003	0.0503081	0.015456	0.274588	0.14476
390	C	0.329531	0.406394	0.393572	0.566751	0.268577	0.0792079	0.217475	0.254453	0.197193	0.28082	0.0258498	0.0157085	0.0253229	0.190337
391	C	0.127943	0.217746	0.198413	0.317259	0.181159	0.0397931	0.31389	0.143753	0.142518	0.143534	0.0263748	0	0.357143	0.148588
399	C	0.461277	0.302419	0.208086	0.328554	0.110589	0.108186	0.221702	0.269839	0.187225	0.164002	0.0750751	0.0594001	0.143541	0.0714388
400	C	0.297693	0.181913	0.214988	0.246078	0.0282486	0	0.177597	0.151381	0.147828	0.224058	0.0647668	0.0302847	0.147893	0.116279
402	C	0.225734	0.444212	0.344396	0.374065	0.143926	0.189753	0.321502	0.371319	0.484429	0.51006	0.2886	0.0768403	0.3282	0.219974
409	C	0.238158	0.214765	0.197239	0.324359	0.229095	0.111441	0.524405	0.397984	0.405505	0.476053	0.344021	0.344714	0.259943	0.283688
417	C	0.862927	1.36165	1.38582	1.7458	0.817818	0.684199	0.710459	1.10701	1.18323	1.84072	0.582278	0.713369	0.826312	0.852084
424	C	0.303856	0.296311	0.276904	0.276472	0.167598	0.042511	0.20762	0.0944287	0.146966	0.136768	0.0238407	0.0135814	0.187639	0.0503905
429	C	0.390384	0.418327	0.392542	0.41994	0.206275	0.0406119	0.300674	0.168138	0.156299	0.216253	0.011956	0.0272294	0.214253	0.138749
430	C	0.322516	0.195065	0.299616	0.369247	0.0213356	0.0399521	0.244549	0.259014	0.143546	0.326173	0.0470588	0.0400962	0.110595	0.209592
441	C	0.429056	0.496467	0.51212	0.489289	0.299625	0.0270015	0.386342	0.360284	0.278462	0.388261	0.219809	0.0730567	0.183507	0.132732
442	C	0.395452	0.40612	0.202543	0.457756	0.169563	0	0.212422	0.164271	0.229406	0.310869	0.0503842	0	0.113225	0.192653
450	C	0.283779	0.287406	0.238564	0.289296	0.0885478	0.0491884	0.221122	0.173137	0.132225	0.253906	0.0900394	0.0126855	0.147105	0.137174
453	C	0.547345	0.436072	0.478568	0.673239	0.266983	0.086122	0.296814	0.308362	0.223985	0.299083	0.0668822	0.0500375	0.167979	0.213411
456	C	0.360877	0.470108	0.4595	0.342131	0.302358	0.137517	0.193798	0.194031	0.239785	0.263209	0.0341375	0	0.170904	0.123637
457	C	0.389213	0.231152	0.225201	0.257258	0.0908265	0.0125329	0.149084	0.156942	0.0865301	0.281035	0.0340445	0	0.149749	0.0897868
459	C	0.276778	0.230681	0.192082	0.317771	0.0601443	0.0748596	0.18902	0.18977	0.132113	0.209804	0.0334411	0.0249813	0.190981	0.120813
462	C	0.470653	0.310724	0.395215	0.28083	0.0802327	0.024947	0.385034	0.34334	0.251397	0.382463	0.0650759	0.0370691	0.137946	0.173273
463	C	0.194049	0.177651	0.181838	0.134507	0.100381	0.0124719	0.11625	0.131211	0.110844	0.120248	0.0429646	0.012279	0.116637	0.107446
472	C	0.375469	0.40032	0.360534	0.397533	0.194486	0.0710631	0.197469	0.211295	0.30133	0.292663	0.0475229	0.108829	0.338261	0.204302
475	C	0.536164	0.611814	0.55668	0.614286	0.378418	0.137091	0.31597	0.348803	0.428691	0.431034	0.274529	0.150376	0.337838	0.193681
479	C	0.420844	0.514354	0.274686	0.625	0.224972	0.0708968	0.419502	0.532022	0.49569	0.44449	0.270603	0.245985	0.325128	0.255624
481	C	0.609594	0.332864	0.430836	0.424448	0.238806	0.0918949	0.422639	0.358352	0.41684	0.503677	0.178423	0.151682	0.370132	0.246154
483	C	0.39036	0.346592	0.435213	0.489466	0.229797	0.0459453	0.284537	0.296799	0.266312	0.160102	0.101639	0.0588668	0.134151	0.103937
490	C	0.628814	0.765027	0.661084	0.645013	0.449679	0.151172	0.216174	0.221309	0.233723	0.258009	0.101227	0.0435477	0.206271	0.193874
491	C	0.310673	0.435414	0.395952	0.365464	0.256082	0.0747384	0.209664	0.204061	0.107285	0.15638	0.0360404	0.0416493	0.267545	0.0743402
492	C	0.277624	0.146978	0.133988	0.207278	0.043262	0.02531	0.124295	0.122926	0.150716	0.157035	0.0361228	0.0277239	0.18797	0.0620117
494	C	0.262839	0.408831	0.41301	0.506714	0.194695	0.0260349	0.212294	0.175638	0.140693	0.159608	0.08449	0	0.232362	0.170545
496	C	0.610687	0.72478	0.767707	1.02723	0.48022	0.0972999	0.207215	0.335468	0.305907	0.402893	0.0694284	0.0387197	0.17843	0.197789
497	C	0.507614	0.502027	0.343727	0.612774	0.540176	0.288046	0.141416	0.142262	0.125945	0.216517	0.115048	0.038432	0.351906	0.103938
498	C	0.299121	0.308821	0.220642	0.305451	0.179533	0.0239923	0.113723	0.122274	0.115716	0.144673	0.0230256	0.0256312	0.214592	0.126933
501	C	0.518807	0.42065	0.565111	0.461148	0.399911	0.141677	0.1545	0.376018	0.17094	0.169527	0.0585274	0.0645078	0.326672	0.313298
502	C	0.459897	0.591377	0.486855	0.619124	0.32967	0.327332	0.247329	0.225564	0.141643	0.401955	0.0718305	0.10582	0.564334	0.275614
503	C	0.344884	0.526226	0.27915	0.349435	0.17425	0.219561	0.227894	0.149283	0.14059	0.19019	0.153965	0.0366077	0.530338	0.0780118
517	C	0.351288	0.396616	0.39376	0.253646	0.337031	0.0534283	0.64836	0.501002	0.558818	0.530017	0.323067	0.0129668	0.156678	0.180766
527	C	0.188847	0.306413	0.279873	0.24249	0.0693963	0.0144051	0.217542	0.19889	0.185728	0.230729	0.0112638	0.0270453	0.109111	0.0756334
532	C	0.266803	0.270324	0.208196	0.199253	0.115546	0.0415053	0.330001	0.320579	0.211193	0.195836	0.0769569	0.0267415	0.14709	0.137931
537	C	0.266014	0.361384	0.406727	0.513361	0.232927	0.0856164	0.21479	0.261438	0.140351	0.224407	0.0113999	0	0.273613	0.182387
539	C	0.344828	0.384376	0.376065	0.412124	0.127741	0.0142694	0.644223	0.512649	0.69966	0.747238	0.336896	0.154995	0.131666	0.404911
543	C	0.286503	0.390184	0.38331	0.353496	0.0959898	0.0288976	0.259202	0.203597	0.194091	0.217889	0.0237727	0.0583771	0.228933	0.186741
548	C	0.557308	0.527223	0.595174	0.530332	0.347808	0.0144196	0.324098	0.204453	0.339094	0.405568	0.0596019	0.0443197	0.184142	0.123102
549	C	0.347991	0.376207	0.324851	0.428071	0.158428	0.0578955	0.167785	0.170979	0.142325	0.30695	0.0716418	0.0893921	0.184602	0.192123
550	C	0.558189	0.445931	0.452781	0.414239	0.26313	0.115858	0.155958	0.202384	0.128921	0.162373	0.0233508	0	0.227027	0.149355
567	C	0.638659	0.538617	0.499688	0.540275	0.345458	0.0573148	0.298134	0.159067	0.226391	0.285545	0.0329888	0.0284981	0.241625	0.233645
568	C	0.309628	0.327049	0.35461	0.355436	0.101709	0.0143123	0.221879	0.202429	0.0541536	0.266325	0.0110193	0.0142491	0.186526	0.15532
570	C	0.417454	0.336247	0.37649	0.353314	0.263558	0.129908	0.262365	0.259375	0.265487	0.377471	0.0776915	0.0287646	0.199756	0.169779
578	C	0.480018	0.764045	0.630517	0.792437	0.19591	0.0326371	0.364266	0.368664	0.331409	0.300808	0.031864	0.0260451	0.251414	0.222691
579	C	0.367524	0.571557	0.328241	0.359464	0.15792	0.049743	0.336976	0.297344	0.352602	0.253188	0.116773	0.0390676	0.166262	0.140466
585	C	0.234055	0.225118	0.324544	0.375777	0.115503	0.109951	0.338108	0.259042	0.196748	0.300464	0.0511195	0.0240558	0.261564	0.213148
592	C	0.30363	0.177208	0.173996	0.243982	0.0898338	0	0.202971	0.174735	0.128055	0.302629	0.0426576	0.0121625	0.0885086	0.113804
593	C	0.160815	0.152693	0.209138	0.115359	0.0152323	0	0.129438	0.113437	0.106952	0.132853	0.0214064	0.0609607	0.133412	0.0913451
603	C	0.369458	0.284437	0.247831	0.510036	0.169875	0.0537346	0.263381	0.278494	0.193207	0.28301	0.0214846	0.0238379	0.228956	0.126089
608	C	0.387597	0.509647	0.285919	0.395017	0.30261	0.0949818	0.195243	0.214237	0.336927	0.240964	0.0401687	0.0335683	0.101574	0.197455
614	C	0.707058	0.857311	0.537482	0.754885	0.458986	0.152022	0.252746	0.33557	0.361741	0.333098	0.0768471	0.0355577	0.268748	0.162037
615	C	0.27381	0.285356	0.345399	0.332322	0.273973	0.132665	0.184699	0.205095	0.211015	0.252576	0.0329164	0.0600096	0.275724	0.139649
618	C	0.471019	0.533168	0.524423	0.781006	0.217103	0.138206	0.325572	0.139785	0.251625	0.349243	0.0447427	0.0707881	0.252324	0.10602
621	C	0.641766	0.617508	0.618883	0.660015	0.35739	0.102474	0.376049	0.312077	0.211076	0.386989	0.108389	0.0924001	0.298159	0.164223
622	C	0.426546	0.376294	0.288105	0.284091	0.274665	0.0832062	0.171184	0.234934	0.234124	0.279706	0.147898	0.0335721	0.277376	0.251142
624	C	0.503006	0.511247	0.5793	0.608607	0.195353	0.201153	0.307492	0.277283	0.305414	0.368513	0.152455	0.1298	0.242971	0.222198
632	C	0.477022	0.580965	0.572831	0.711595	0.2792	0.0778437	0.178731	0.178103	0.17163	0.181342	0.0762195	0.0492417	0.149638	0.134395
633	C	0.22242	0.26107	0.166852	0.29267	0.150923	0.0378215	0.175116	0.174296	0.0672043	0.217736	0.046799	0.0487187	0.0806842	0.133457
636	C	0.51717	0.666728	0.462497	0.68179	0.379417	0.110638	0.278525	0.260547	0.249653	0.438885	0.060741	0.0311591	0.23625	0.204638
638	C	0.437419	0.56721	0.432263	0.646831	0.354391	0.0835981	0.234261	0.112005	0.131492	0.201342	0.0410889	0.0210504	0.238854	0.0920916
639	C	0.399182	0.310587	0.330033	0.438445	0.114758	0.0659413	0.202957	0.110954	0.158553	0.121776	0.020377	0.0208203	0.191898	0.0913555
645	C	0.374874	0.512605	0.268892	0.322997	0.211679	0.0158894	0.233668	0.346762	0.224866	0.179131	0.0720684	0.0441209	0.166205	0.153701
660	C	0.696798	0.743173	0.639985	0.777778	0.588323	0.154736	0.242057	0.299835	0.258423	0.328523	0.0622278	0.022007	0.23266	0.159275
663	C	0.390505	0.465426	0.399874	0.433787	0.3125	0.0945505	0.307268	0.24981	0.221283	0.27531	0.0539957	0.0450298	0.309215	0.0756811
674	C	0.824111	0.685689	0.715478	0.656096	0.472041	0.105213	0.359317	0.23664	0.2646	0.36049	0.0592827	0.0107342	0.141808	0.135585
676	C	0.265092	0.330447	0.327909	0.293747	0.148327	0.019687	0.350092	0.279303	0.286506	0.305451	0.0770713	0.0528262	0.264392	0.230387
687	C	0.420918	0.303693	0.333511	0.379535	0.100847	0.0752526	0.254954	0.184035	0.25684	0.247968	0.100312	0.036368	0.227101	0.142328
695	C	0.373732	0.229381	0.19114	0.447513	0.15814	0.0580945	0.24458	0.231609	0.25434	0.29785	0.158562	0.135166	0.231152	0.197161
699	C	0.0921942	0.154157	0.177502	0.210084	0.126064	0.0671785	0.122195	0.0768977	0.0673552	0.128419	0.0420698	0.100435	0.167239	0.0912647
703	C	0.3367	0.331839	0.331092	0.259189	0.0965036	0.0692821	0.401389	0.2776	0.361327	0.361236	0.0511404	0.0214915	0.291339	0.112711
707	C	0.483412	0.37109	0.402768	0.361221	0.259355	0.00850991	0.122795	0.0549692	0.0793021	0.242316	0.0209864	0.0108956	0.0913173	0.101381
708	C	0.118939	0.059911	0.140393	0.112956	0.0434562	0.0164582	0.0110754	0.0652245	0.0336852	0.0884508	0.0312045	0	0.0508906	0.0375375
710	C	0.524211	0.618006	0.451822	0.449364	0.576636	0.0563834	0.0995796	0.0108566	0.112372	0.050226	0.062474	0.0107538	0.0354308	0.0497946
711	C	0.0589772	0.0473037	0.0562324	0.0515996	0.0408803	0.022633	0.141197	0.117096	0.0443705	0.121803	0.0715746	0	0.0653125	0.0479559
713	C	1.77436	1.37276	1.13764	0.841457	1.49335	1.61011	1.79954	1.31424	1.10122	0.769607	1.75439	1.477	1.50875	1.61563
718	C	0.142045	0.109813	0.093301	0.234934	0.122299	0.0376251	0.077821	0.0325662	0.0227041	0.0736377	0.0104998	0.0108873	0.0516863	0.0365186
722	C	0.53791	0.690486	0.717978	0.648739	0.453088	0.0308095	0.296173	0.0921234	0.123183	0.192901	0.0560475	0.0240674	0.131987	0.183558
723	C	0.205339	0.144823	0.182202	0.18864	0.0349235	0.0385178	0.118751	0.0580046	0.0620117	0.116249	0.0225657	0.0121124	0.0725546	0.157874
725	C	0.49649	0.450995	0.36542	0.440991	0.512173	0.0619819	0.108538	0.0591926	0.0125612	0.0520698	0.011534	0	0.105981	0.120434
726	C	0.0937686	0.0964165	0.0863309	0.0731452	0.0280053	0.0155015	0.0968758	0.0238067	0.0252589	0.116249	0.011566	0	0.0594413	0.0267917
728	C	0.591564	0.615734	0.765578	0.650919	0.530373	0.0939188	0.0791452	0	0.0410453	0.110757	0.0502323	0.0135263	0.0861269	0.0280466
729	C	0.181003	0.0894527	0.17549	0.137059	0.120833	0.0710564	0.0545108	0.0808081	0.0706115	0.0569801	0.0518336	0.0279057	0.119888	0.145391
730	C	0.0432003	0.0408163	0.0390854	0.052843	0.0142664	0.00792267	0.0552486	0.0546523	0	0.04329	0.0263019	0.0282366	0.0400641	0.0147406
733	C	0.582001	0.689995	0.590435	0.720644	0.710339	0.00796876	0.0569476	0.0704027	0.147514	0.102987	0.0135833	0.02886	0.0536085	0.0150218
734	C	0.370599	0.250627	0.240336	0.344531	0.359238	0.0160321	0.0465405	0.0631114	0.131557	0.0783208	0.030409	0.0154083	0.0809225	0.0474759
735	C	0.202876	0.267536	0.250777	0.28998	0.286554	0.0320718	0.0156519	0.0633814	0.0501169	0.109238	0.0153139	0	0.060696	0.0473934
736	C	0.168739	0.202071	0.20202	0.12952	0.103827	0.0403128	0.131234	0.116998	0.0352423	0.127918	0.063857	0.0477555	0.0813008	0.0325098
738	C	0.662964	0.511073	0.490848	0.543892	0.489642	0.0898326	0.120523	0.121845	0.0949127	0.281737	0.0169952	0	0.11647	0.0503778
739	C	0.332465	0.358729	0.318177	0.305377	0.189165	0.0410408	0.174277	0.105578	0.172778	0.133333	0	0.0168805	0.10992	0.101078
740	C	0.30951	0.34225	0.350071	0.499716	0.343972	0.0348341	0.110396	0.14771	0.0410004	0.139106	0.0545554	0.0183621	0.161634	0.0365831
741	C	0.404325	0.415876	0.318646	0.387906	0.233626	0.0961202	0.144796	0.164204	0.204415	0.102951	0.0359454	0.0363636	0.0737191	0.108637
745	C	0.473659	0.523903	0.446429	0.469539	0.327979	0.0456788	0.208689	0.30482	0.210926	0.106857	0.0375446	0.0190042	0.245663	0.0561693
746	C	0.340169	0.367197	0.345622	0.507794	0.254065	0.0829111	0.153022	0.270322	0.255646	0.233058	0.0190006	0	0.162576	0.132051
748	C	0.507408	0.650888	0.487448	0.600932	0.32287	0.0588293	0.217048	0.180759	0.221877	0.292131	0.0595002	0.0618302	0.190808	0.157017
750	C	0.227696	0.201471	0.265152	0.226358	0.120751	0.0200823	0.421687	0.350082	0.224215	0.276753	0.102041	0.0844416	0.211024	0.237248
753	C	0.452606	0.615385	0.642674	0.793404	0.173956	0.0660764	0.622904	0.79614	0.474308	1.05657	0.174956	0.128634	0.225419	0.26506
755	C	0.435695	0.588235	0.524723	0.672734	0.358481	0.145185	0.266596	0.238474	0.202488	0.389769	0.0837755	0.143308	0.210422	0.184697
756	C	0.321888	0.428189	0.224316	0.265018	0.23645	0.103057	0.0828043	0.109679	0.118483	0.128535	0.0870322	0.08726	0.142284	0.079766
757	C	0.309897	0.470035	0.294551	0.340301	0.199283	0.0187371	0.0853485	0.114123	0.151423	0.0530363	0.0302024	0.0621697	0.124896	0.220507
758	C	0.305499	0.307125	0.154242	0.307062	0.229406	0.0582637	0.150905	0.251383	0.132345	0.193004	0	0.0585652	0.183668	0.28826
759	C	0.550297	0.396651	0.301205	0.352782	0.421847	0.102923	0.171359	0.268489	0.182149	0.325733	0	0.0297354	0.283033	0.211138
761	C	0.380421	0.307062	0.186683	0.496278	0.127194	0.153531	0.424628	0.254394	0.171695	0.251601	0	0.0310366	0.22795	0.274725
766	C	0.576606	0.712657	0.838926	0.506415	0.271665	0	0.223914	0.260078	0.414938	0.128921	0.0667854	0.0617475	0.20062	0.326353
768	C	0.689242	0.341403	0.43088	0.475668	0.339655	0.0272702	0.436872	0.320718	0.205433	0.314729	0.0221043	0	0.0968992	0.134662
773	C	0.502008	0.26621	0.443906	0.387697	0.163934	0.0503018	0.174149	0.156648	0.268484	0.23664	0.10022	0.0514668	0.133014	0.148002
781	C	0.393873	0.720384	0.461991	0.447011	0.320053	0.0230894	0.257186	0.200463	0.258356	0.227199	0.0300752	0.0518224	0.189412	0.126172
782	C	0.357347	0.36587	0.233549	0.329248	0.130081	0.0453155	0.161979	0.0906755	0.206284	0.190235	0.0146735	0.0672948	0.130027	0.141393
783	C	0.353021	0.174411	0.32603	0.363322	0.071876	0.0751718	0.325272	0.231985	0.198868	0.305344	0.0850702	0.0160462	0.213125	0.152027
785	C	0.425692	0.323662	0.339847	0.287036	0.190223	0.0796099	0.405972	0.445104	0.241649	0.322762	0.118126	0.103032	0.262231	0.310029
790	C	0.526883	0.364883	0.488998	0.516403	0.353133	0.0838379	0.147239	0.275931	0.18575	0.320128	0.0489716	0.026824	0.247697	0.171895
791	C	0.190024	0.197131	0.196486	0.240276	0.098699	0.0185151	0.133495	0.049597	0.0655308	0.0923605	0	0.0397878	0.160944	0.113411
792	C	0.28503	0.147929	0.135333	0.202752	0.0614952	0.0272926	0.176824	0.19247	0.101872	0.178937	0.0117592	0.0129132	0.142975	0.082713
797	C	0.385999	0.366241	0.407526	0.355319	0.208614	0.0437445	0.542699	0.508721	0.394945	0.589168	0.311494	0.0113882	0.190464	0.161491
803	C	0.521904	0.413681	0.384893	0.48024	0.187793	0.0937647	0.282624	0.380571	0.401171	0.33398	0.159776	0.010819	0.246734	0.150254
824	C	0.286092	0.40047	0.305111	0.316073	0.137948	0.0750422	0.21594	0.163132	0.169224	0.224143	0.0526648	0.0411226	0.180726	0.115135
829	C	0.464128	0.363825	0.294889	0.437855	0.290372	0.0928107	0.210305	0.382054	0.155651	0.355994	0.0792393	0.0548125	0.3027	0.177837
833	C	0.480414	0.784034	0.681773	0.617212	0.425498	0.0773661	0.360065	0.158983	0.280317	0.17762	0.0817471	0.104348	0.255009	0.127359
834	C	0.187161	0.343705	0.305064	0.377314	0.167638	0.0260123	0.152406	0.102052	0.109051	0.118329	0.0699545	0.0464253	0.190728	0.127109
835	C	0.44797	0.361141	0.325667	0.457263	0.111902	0.0775862	0.247206	0.223689	0.274038	0.21028	0.0576103	0.114338	0.278715	0.204685
839	C	0.757899	0.675676	0.557238	0.699583	0.585709	0.0739723	0.306373	0.256082	0.34009	0.237749	0.0683247	0.0559519	0.208806	0.162206
840	C	0.32522	0.258987	0.264423	0.331697	0.0967118	0.0419683	0.217181	0.163501	0.145715	0.234803	0.054003	0.0415282	0.188645	0.159363
842	C	0.510576	0.639637	0.480943	0.60646	0.397133	0.114847	0.274824	0.2849	0.285455	0.37232	0.0941873	0.0690894	0.26901	0.183126
843	C	0.464282	0.585162	0.282417	0.591796	0.267724	0.106746	0.343358	0.233473	0.318309	0.229329	0.0531491	0.0834957	0.292558	0.18303
850	C	0.40098	0.32996	0.390219	0.472644	0.276831	0.0704308	0.216947	0.373483	0.330487	0.178719	0.160607	0.03125	0.183899	0.18846
851	C	0.317634	0.33703	0.331844	0.212194	0.147152	0.0924962	0.235382	0.401658	0.3245	0.376142	0.0715001	0.136965	0.31329	0.212615
853	C	0.369086	0.311249	0.375016	0.390964	0.244707	0.0700117	0.189657	0.34469	0.387543	0.425182	0.117096	0.138889	0.124146	0.288226
856	C	0.602138	0.624239	0.558347	0.600601	0.508017	0.163132	0.344234	0.332025	0.137489	0.324224	0.083654	0	0.344828	0.336269
876	C	0.542339	0.389381	0.391116	0.287502	0.265734	0	0.122354	0.321048	0.116762	0.377715	0.0577784	0.0144655	0.0784929	0.0941873
877	C	0.345814	0.249773	0.266773	0.279376	0.108123	0.0302984	0.2477	0.261747	0.379762	0.26096	0.0825196	0.0377169	0.260062	0.181291
879	C	0.415973	0.339905	0.346205	0.362021	0.202129	0.0453446	0.351947	0.136307	0.254237	0.24746	0.0544514	0.0624688	0.210448	0.132562
884	C	0.55638	0.637018	0.342419	0.496235	0.515105	0.0318269	0.172861	0.262329	0.200426	0.191965	0.0141363	0.0128222	0.229738	0.151095
900	C	0.426366	0.389321	0.171889	0.426069	0.140074	0.043472	0.246305	0.221755	0.22006	0.1213	0.114855	0.0342779	0.298401	0.155538
905	C	0.353185	0.448642	0.282566	0.41632	0.206072	0.0791264	0.288784	0.251648	0.241167	0.303682	0.0655824	0.058099	0.270166	0.203966
911	C	0.574329	0.614518	0.4649	0.655022	0.275947	0.0541223	0.332889	0.409184	0.346679	0.391246	0.200728	0.103211	0.214439	0.257328
912	C	0.285055	0.104207	0.252924	0.480858	0.0947568	0.0927472	0.268557	0.131536	0.129074	0.263757	0.0973947	0.0224517	0.0579039	0.22991
927	C	0.406002	0.317037	0.434963	0.706381	0.165803	0.113817	0.271682	0.23849	0.280196	0.312862	0.140515	0.103231	0.364194	0.196484
930	C	0.741656	0.856999	0.823893	0.976385	0.51261	0.37938	0.579131	0.376536	0.312293	0.44405	0.369706	0.131353	0.51059	0.171735
931	C	0.512821	0.508663	0.362665	0.768082	0.267227	0.380838	0.298824	0.230437	0.317777	0.256465	0.214823	0.124748	0.478469	0.267994
937	C	0.502165	0.578035	0.480866	0.557222	0.636329	0.100402	0.318662	0.282293	0.165761	0.176153	0.0653381	0.0649773	0.519698	0.156087
941	C	0.160282	0.29734	0.272232	0.25763	0.0716332	0.0378788	0.156311	0.191351	0.191518	0.128411	0.0214362	0	0.170887	0.081808
948	C	0.382057	0.395742	0.324625	0.549734	0.17118	0.126823	0.421388	0.299918	0.49548	0.442296	0.285278	0.223645	0.294494	0.243285
950	C	0.553291	0.781468	0.610233	0.655215	0.386349	0.0826446	0.219089	0.239875	0.396057	0.325391	0.145048	0.113204	0.209451	0.216834
951	C	0.348432	0.292642	0.217189	0.335511	0.113784	0.08285	0.215235	0.245031	0.239644	0.206697	0.132316	0.102701	0.220464	0.234306
953	C	0.501781	0.519322	0.480451	0.547838	0.258207	0.166144	0.230791	0.287117	0.216169	0.363209	0.0727953	0.0104134	0.32702	0.187673
967	C	0.438927	0.391924	0.51053	0.399324	0.176704	0.097779	0.150754	0.197239	0.130789	0.166698	0.0554477	0.0284576	0.150602	0.113805
973	C	0.532531	0.40477	0.336466	0.434052	0.227091	0.0648424	0.245388	0.20656	0.215584	0.203911	0.0276957	0.0182815	0.177983	0.208026
974	C	0.26824	0.254712	0.185004	0.31185	0.0874891	0.0743034	0.238801	0.265039	0.214592	0.262182	0.098346	0.0714541	0.146274	0.22047
977	C	0.495571	0.43816	0.383264	0.597129	0.134212	0.0490256	0.40306	0.240597	0.310582	0.279809	0.0890631	0.0821468	0.228639	0.197986
979	C	0.408288	0.366124	0.321643	0.440205	0.0706631	0.0592207	0.161773	0.166561	0.116161	0.177132	0	0.0182782	0.215768	0.129099
984	C	0.286433	0.223621	0.20165	0.274841	0.100573	0.041365	0.264511	0.205656	0.338158	0.18774	0.0575185	0.0427022	0.0966758	0.127531
988	C	0.553346	0.464422	0.313885	0.393324	0.351441	0.0309885	0.192821	0.224198	0.253546	0.25739	0.0671704	0.0260575	0.266607	0.201824
989	C	0.436224	0.385002	0.223069	0.363948	0.202163	0.135614	0.201884	0.23361	0.17915	0.18444	0.0507442	0.035097	0.305651	0.114192
994	C	0.366435	0.277405	0.274725	0.496222	0.0767881	0.0570581	0.265272	0.221882	0.261965	0.252717	0.0525808	0.0556225	0.264763	0.168081
1000	C	0.264333	0.353794	0.254117	0.381166	0.130961	0.0330943	0.192427	0.151902	0.179845	0.16776	0.047081	0.00803471	0.141498	0.161967
1006	C	0.487423	0.594935	0.470634	0.508383	0.325904	0.0432807	0.254669	0.236795	0.327988	0.363875	0.0297663	0.0153787	0.147676	0.161949
1007	C	0.260701	0.273156	0.191498	0.335817	0.122562	0.052615	0.198045	0.154192	0.141626	0.135385	0.0290508	0.0448799	0.167351	0.12355
1019	C	0.243627	0.2508	0.191378	0.252886	0.0535217	0.0550358	0.167723	0.159084	0.155141	0.230672	0.0427991	0.0140598	0.105331	0.10435
1026	C	0.313152	0.44905	0.383412	0.504331	0.181372	0.0333259	0.257053	0.197477	0.180788	0.287921	0.042653	0.0351222	0.183931	0.156976
1032	C	0.216308	0.291271	0.190904	0.190567	0.126743	0.0497327	0.258056	0.246457	0.177096	0.241091	0.0154238	0.0229446	0.0933532	0.163492
1039	C	0.282561	0.299929	0.32248	0.283447	0.164276	0.117316	0.297947	0.332971	0.318704	0.296472	0.197194	0.142343	0.252086	0.216859
1047	C	0.200316	0.251737	0.205597	0.241676	0.0768147	0.0672676	0.225638	0.212672	0.121637	0.258461	0.0323337	0.0317612	0.166879	0.158598
1053	C	0.272865	0.233804	0.345712	0.258833	0.122249	0.0765697	0.232264	0.321943	0.166594	0.300057	0.0969932	0.0466128	0.132953	0.17991
1057	C	0.301675	0.221261	0.255933	0.253435	0.0251099	0.0259336	0.151069	0.134515	0.173748	0.176663	0.00879275	0	0.136002	0.114072
1063	C	0.44661	0.443525	0.424312	0.373038	0.293327	0.0255493	0.180406	0.224215	0.152991	0.148575	0.0377786	0.0185168	0.122862	0.134012
1064	C	0.23104	0.23385	0.159417	0.216257	0.060687	0.0766186	0.163755	0.148295	0.160115	0.258565	0.0281822	0.0368155	0.103112	0.106952
1067	C	0.284984	0.438387	0.258659	0.272885	0.144718	0.0512033	0.344261	0.249045	0.203368	0.23919	0.0474879	0.0372717	0.234698	0.206965
1074	C	0.430841	0.41048	0.504634	0.450755	0.188199	0	0.393944	0.253103	0.387229	0.386517	0.214632	0.185202	0.164959	0.281715
1075	C	0.327782	0.223906	0.305437	0.433719	0.174444	0.0232315	0.273224	0.240906	0.333747	0.264434	0.201373	0.101168	0.196867	0.166084
1078	C	0.469102	0.448786	0.491632	0.363595	0.311908	0.0477213	0.299377	0.17938	0.273315	0.188822	0.0588582	0.107286	0.202518	0.187161
1079	C	0.254501	0.285688	0.186998	0.214133	0.0583294	0.0629327	0.201102	0.17428	0.151299	0.184957	0.0212247	0.0320821	0.168824	0.112555
1085	C	0.326135	0.283969	0.175801	0.264667	0.11814	0.0351083	0.25738	0.221352	0.231673	0.266008	0.0296413	0.0294695	0.178079	0.20743
1090	C	0.649661	0.986781	0.795607	0.683371	0.550287	0.128189	0.248437	0.328827	0.246349	0.350491	0.0639182	0.0526815	0.281068	0.187803
1091	C	0.24115	0.271841	0.13567	0.205388	0.14176	0.0515265	0.187234	0.145693	0.113756	0.228901	0.052776	0.0625717	0.171908	0.0873871
1094	C	0.482936	0.626566	0.382312	0.575636	0.510471	0.0577868	0.313837	0.281605	0.237733	0.305477	0.209448	0.103687	0.290503	0.210815
1095	C	0.298401	0.264794	0.312234	0.307602	0.0983975	0.0762544	0.175644	0.186838	0.1752	0.290438	0.119303	0.0117371	0.204795	0.191123
1098	C	0.412242	0.422807	0.283413	0.415896	0.146671	0.0641026	0.272975	0.299818	0.0999201	0.323214	0.0987898	0.0122115	0.280183	0.273853
1103	C	0.262214	0.390362	0.236847	0.338983	0.175131	0.0177368	0.231609	0.187025	0.0968367	0.200426	0.0805153	0.0267917	0.185185	0.190408
1106	C	0.503245	0.347848	0.174603	0.324465	0.135216	0.0336134	0.327696	0.213988	0.329829	0.277209	0.038625	0.0127845	0.15983	0.182004
1109	C	0.393167	0.332491	0.258732	0.218671	0.092707	0.0689061	0.271238	0.150098	0.245176	0.355566	0.0264585	0.0129769	0.174426	0.233209
1116	C	0.594648	0.560538	0.676679	0.532387	0.414525	0.0365564	0.331596	0.187852	0.17135	0.252693	0.0422357	0.0569314	0.111157	0.129132
1117	C	0.353405	0.602571	0.28125	0.32462	0.12747	0.0340774	0.165426	0.185966	0.192656	0.0925069	0.0279369	0.0142066	0.102498	0.181113
1118	C	0.217391	0.2812	0.217763	0.222755	0.112	0.0510899	0.215931	0.138243	0.173953	0.148208	0.0142106	0	0.0770812	0.117586
1123	C	0.607727	0.711845	0.524676	0.685566	0.355993	0.0175901	0.298895	0.376202	0.291391	0.262505	0.0782963	0.0748951	0.272517	0.296656
1124	C	0.611621	0.517986	0.490757	0.463134	0.252738	0.0170126	0.169912	0.282127	0.200535	0.264628	0	0.0451603	0.135281	0.0808081
1125	C	0.408401	0.518657	0.548476	0.686075	0.149975	0.147348	0.248663	0.405077	0.394854	0.556427	0.0453378	0.0869313	0.302154	0.206799
1127	C	0.743325	0.808868	0.70035	0.89061	0.745763	0.101027	0.350833	0.257209	0.255232	0.273696	0.0602319	0.132685	0.203114	0.262709
1128	C	0.382438	0.527585	0.434129	0.351975	0.186346	0.100773	0.26088	0.191791	0.252131	0.192202	0.0712555	0.067595	0.281993	0.147493
1132	C	0.436242	0.492126	0.306306	0.593346	0.307637	0.251076	0.261601	0.123457	0.15111	0.252224	0.0137419	0.0130378	0.188106	0.168168
1135	C	0.474517	0.499054	0.60015	0.490196	0.228007	0.0742253	0.28643	0.350149	0.15817	0.406219	0.0730247	0.0938464	0.268697	0.198413
1138	C	0.424376	0.449326	0.362845	0.366537	0.128393	0.0719554	0.254791	0.204721	0.236061	0.250132	0.0543404	0.0992433	0.115423	0.205714
1139	C	0.234192	0.290209	0.318578	0.299461	0.204116	0.0788395	0.369648	0.255811	0.276008	0.168817	0.0753485	0.12296	0.125739	0.206207
1146	C	0.435323	0.443086	0.403158	0.508233	0.258487	0.0318573	0.197362	0.158282	0.225322	0.292505	0.0639959	0	0.13587	0.0735913
1147	C	0.226436	0.25	0.168945	0.424511	0.0950269	0.0152277	0.128726	0.226855	0.10353	0.104797	0.0490196	0.0336663	0.11755	0.0716039
1153	C	0.417607	0.408434	0.389545	0.484368	0.166966	0.0514602	0.402967	0.489706	0.395883	0.548741	0.102822	0.0847188	0.129844	0.205862
1162	C	0.436248	0.45188	0.237826	0.284937	0.219729	0.0938306	0.185907	0.173695	0.224325	0.226757	0.0555494	0.0307314	0.239367	0.162059
1163	C	0.406021	0.298134	0.283415	0.400828	0.27839	0.140269	0.273104	0.278311	0.281608	0.308388	0.232147	0.0713194	0.202634	0.15186
1180	C	0.35036	0.463636	0.305377	0.455362	0.157587	0.0690846	0.201256	0.158144	0.248403	0.287863	0.0414594	0	0.165049	0.0831486
1185	C	0.613216	0.612889	0.341635	0.600456	0.280867	0.0824791	0.232763	0.227691	0.253096	0.339201	0.0311236	0	0.194989	0.110011
1191	C	0.470987	0.426163	0.229595	0.458716	0.231241	0.0736196	0.301525	0.26362	0.214702	0.301054	0.0692361	0.0468274	0.16275	0.144733
1205	C	0.450699	0.369702	0.418594	0.557643	0.275421	0.159314	0.419346	0.359823	0.304978	0.282841	0.120019	0.103788	0.276554	0.26516
1213	C	0.27881	0.31825	0.235294	0.370828	0.172374	0.0478526	0.218579	0.181006	0.161712	0.240761	0.0699594	0.0446561	0.1074	0.128999
1215	C	0.414551	0.607691	0.244328	0.470979	0.526376	0.0357739	0.414891	0.18432	0.215435	0.209257	0.114564	0.169127	0.128274	0.210748
1216	C	0.277008	0.348592	0.063593	0.205682	0.137566	0.0558971	0.191183	0.248725	0.0638407	0.160951	0.0290065	0.0308785	0.0822876	0.0928013
1218	C	0.418001	0.467012	0.26871	0.421078	0.228288	0.0526427	0.154611	0.183464	0.16464	0.206586	0.0848896	0.0149678	0.106921	0.19425
1219	C	0.245264	0.169218	0.10394	0.205808	0.0936593	0.0489908	0.138978	0.0709807	0.171821	0.317909	0.0542226	0	0.191816	0.12655
1230	C	0.592792	0.654135	0.581924	0.500319	0.631081	0.0563222	0.27338	0.292212	0.179682	0.293758	0.129441	0	0.0959024	0.0530504
1231	C	0.187559	0.1485	0.0540005	0.189913	0.0950488	0.0185099	0.157924	0.125691	0.0549451	0.206211	0.0141945	0	0.042996	0.0521853
1234	C	0.302419	0.426973	0.311971	0.364469	0.12791	0.0920471	0.235876	0.337331	0.1374	0.265861	0.0563777	0.0143596	0.230552	0.219809
1237	C	0.381798	0.450717	0.520459	0.312533	0.254669	0.0822594	0.363108	0.229265	0.19899	0.333933	0.0300571	0	0.153518	0.163711
1247	C	0.0826515	0.118064	0.0851064	0.0880088	0.0547445	0.0196175	0.231918	0.274503	0.30326	0.284474	0.0875197	0.0169377	0.0920726	0.0771843
1249	C	0.0497306	0.0710732	0.0379903	0.0331089	0.04588	0.0396629	0.104869	0.100351	0.0600962	0.0462606	0	0.0173611	0.00936154	0.0158128
1252	C	0.223695	0.13443	0.180231	0.230972	0.128771	0.0495884	0.227135	0.389237	0.344968	0.248293	0.0725295	0.0172831	0.121598	0.142405
1254	C	0.311833	0.360756	0.187582	0.337985	0.137187	0.0596659	0.370096	0.180772	0.195008	0.30216	0.0875197	0	0.233732	0.184417
1261	C	0.237925	0.244368	0.388673	0.32089	0.238423	0.030248	0.225464	0.20707	0.203252	0.163555	0.0436936	0.0439818	0.107981	0.0992204
1262	C	0.405633	0.426001	0.357974	0.496021	0.250694	0.0394828	0.270536	0.325512	0.18573	0.267312	0.119	0.0558971	0.104196	0.217569
1264	C	0.2292	0.168869	0.161276	0.289705	0.0898473	0.0598922	0.244708	0.228372	0.10687	0.317098	0.0521785	0.0140311	0.152207	0.23054
1266	C	0.387168	0.449764	0.268618	0.493774	0.263579	0.0525873	0.317083	0.101112	0.248139	0.2457	0.0703136	0.0754717	0.15	0.103321
1267	C	0.433003	0.35469	0.322938	0.502889	0.282885	0.0862255	0.227212	0.174191	0.246629	0.289296	0.0695314	0.0764877	0.228453	0.151538
1268	C	0.306604	0.211018	0.175261	0.214179	0.0471876	0.0650407	0.145599	0.215703	0.227273	0.149578	0.0692521	0.0302893	0.156315	0.119814
1271	C	0.445324	0.426372	0.30141	0.372839	0.28169	0.18217	0.201562	0.180405	0.264386	0.241028	0.0541712	0.0869691	0.342136	0.1706
1272	C	0.414376	0.38857	0.359102	0.299815	0.269095	0.082713	0.124922	0.192811	0.137028	0.133333	0.0800427	0.0713165	0.437063	0.155565
1273	C	0.392257	0.312038	0.259818	0.289754	0.123813	0.132642	0.190522	0.132066	0.171478	0.193075	0.0374579	0.0405022	0.306984	0.122366
1277	C	0.63358	0.584206	0.586654	0.663373	0.209282	0.11422	0.233775	0.170878	0.207927	0.276343	0.0692761	0.0494193	0.287034	0.16656
1279	C	0.614014	0.413128	0.300177	0.378609	0.138677	0.20114	0.211135	0.14512	0.141189	0.214516	0.0820441	0.0509749	0.429062	0.194578
1283	C	0.457694	0.356422	0.247797	0.436399	0.0978884	0.0675333	0.19527	0.188014	0.172096	0.243394	0.0893755	0.0483384	0.100777	0.165436
1292	C	0.205717	0.316327	0.212148	0.26738	0.105932	0.0924703	0.237016	0.259213	0.220443	0.210363	0.042163	0.0449539	0.176284	0.174108
1303	C	0.537109	0.722983	0.607749	0.677464	0.471536	0.076621	0.297089	0.237864	0.178831	0.33049	0.0200421	0.0102617	0.182515	0.308715
1305	C	0.537719	0.458648	0.377173	0.420427	0.280876	0.0373308	0.323023	0.352526	0.418088	0.451776	0.157806	0.0707929	0.125369	0.269668
1309	C	0.496017	0.551549	0.409062	0.497901	0.26575	0.0542005	0.201787	0.114536	0.0967222	0.26738	0.0579878	0.019757	0.12241	0.0797357
1311	C	0.375601	0.395536	0.251473	0.390587	0.124844	0.0811322	0.153639	0.177065	0.193299	0.380776	0	0.0493535	0.244606	0.136659
1316	C	0.49012	0.453548	0.415817	0.585445	0.344193	0.0181719	0.157356	0.139425	0.110156	0.274406	0.010007	0.0206911	0.133357	0.142552
1317	C	0.510717	0.530061	0.36396	0.360433	0.0474871	0.0447588	0.482998	0.359446	0.367926	0.37543	0.0991965	0.0511352	0.262973	0.377537
1331	C	0.661033	0.482203	0.500493	0.736713	0.436771	0.535506	0.273277	0.358864	0.249792	0.3673	0.162617	0.243828	0.32345	0.117816
1336	C	0.451012	0.613766	0.460629	0.553366	0.524381	0.0591017	1.09671	0.85693	0.634483	0.638298	0.182421	0.0700464	0.229513	0.253165
1337	C	35.8842	29.1299	22.9129	12.6376	0.633637	0.218009	31.4903	23.5493	17.0482	10.6273	0.181788	0.0443538	24.2132	19.3612
1341	C	0.436836	0.409076	0.46198	0.435846	0.182072	0.0520799	0.233623	0.298824	0.232256	0.290552	0.0908866	0.026053	0.140826	0.0605767
1355	C	0.451039	0.397208	0.407194	0.50344	0.201356	0.0948836	0.248535	0.337868	0.18277	0.362561	0.0549106	0.043204	0.232378	0.151781
1363	C	0.537018	0.455418	0.348581	0.438185	0.184443	0.0350484	0.189363	0.280922	0.31384	0.289226	0.0590014	0.0246144	0.16154	0.287674
1373	C	0.502977	0.406826	0.423779	0.561251	0.262917	0.019581	0.157918	0.136199	0.140855	0.192469	0.0614125	0.0523913	0.130386	0.0795782
1374	C	0.372045	0.303983	0.327332	0.341069	0.0606024	0.0129483	0.220578	0.208603	0.175061	0.317712	0.0588466	0.0218882	0.211914	0.0764745
1380	C	0.380725	0.273526	0.247671	0.348406	0.14771	0.0469232	0.293074	0.307905	0.241193	0.339559	0.077832	0.0452455	0.183733	0.148441
1384	C	0.206113	0.291273	0.260481	0.277649	0.103159	0.0347657	0.219378	0.241865	0.205077	0.225388	0.089427	0.0285939	0.146543	0.188781
1389	C	0.342236	0.24629	0.331245	0.181677	0.115866	0.0297133	0.227049	0.221003	0.1544	0.242131	0.0362083	0.00736431	0.111779	0.162031
1391	C	0.415466	0.510429	0.460829	0.473566	0.17316	0.0224837	0.555222	0.385604	0.354021	0.529451	0.208753	0.0663962	0.17623	0.133988
1395	C	0.439481	0.477773	0.367295	0.470633	0.246032	0.133988	0.248283	0.308513	0.266129	0.193086	0.0662361	0.0777135	0.210356	0.256892
1399	C	0.691332	0.681419	0.639515	0.689587	0.495704	0.0563857	0.227426	0.279803	0.19884	0.299149	0.0510595	0.0178651	0.229924	0.192874
1403	C	0.473066	0.47868	0.42244	0.521294	0.372024	0.104692	0.195246	0.254777	0.2	0.226138	0.0426803	0.00892379	0.225011	0.163499
1410	C	0.197824	0.287081	0.280136	0.403067	0.147965	0.0958773	0.158598	0.245992	0.232153	0.306236	0.0843811	0.0519976	0.237029	0.136466
1412	C	0.349977	0.377986	0.351865	0.45427	0.196062	0.0592768	0.154613	0.237238	0.198361	0.208729	0.139179	0.0617502	0.163073	0.176956
1415	C	0.454377	0.44531	0.547585	0.468153	0.350281	0.253389	0.223931	0.168001	0.263107	0.204808	0.0584738	0.0300842	0.226083	0.145593
1416	C	0.331869	0.295508	0.268974	0.380577	0.112045	0.0128139	0.233645	0.198748	0.0968898	0.119112	0.00975134	0	0.182238	0.0897163
1417	C	0.51174	0.356597	0.414837	0.216655	0.264824	0.0907559	0.158228	0.140534	0.127301	0.186261	0.0589797	0.0202634	0.311526	0.148199
1418	C	0.356162	0.363146	0.385237	0.455549	0.175254	0.0792393	0.1782	0.231086	0.206287	0.209113	0.0590261	0.0708072	0.163831	0.205362
1419	C	0.277864	0.293994	0.365746	0.320692	0.188546	0.106553	0.257885	0.200642	0.245555	0.253416	0.0295072	0.0303398	0.264917	0.193556
1423	C	0.724549	0.539985	0.375	0.515215	0.0933582	0.149009	0.328915	0.301598	0.313849	0.512653	0.0484637	0.049373	0.254094	0.203505
1427	C	0.181181	0.139505	0.229779	0.220855	0.0779626	0.0291843	0.226289	0.178077	0.152701	0.294272	0.0757504	0.0964227	0.152207	0.166389
1430	C	0.2936	0.329389	0.279412	0.414938	0.112697	0.0277932	0.21089	0.288101	0.222696	0.306717	0.055417	0	0.220607	0.236457
1433	C	0.473317	0.599755	0.523104	0.596695	0.266059	0.0846501	0.376536	0.224544	0.189286	0.306327	0.131703	0.0188537	0.220008	0.131219
1434	C	0.473205	0.231059	0.530466	0.443086	0.138574	0.0997151	0.187735	0.265442	0.128129	0.26336	0.0973236	0.057943	0.220321	0.0903648
1435	C	0.470976	0.446536	0.439093	0.683475	0.262533	0.0567135	0.228145	0.131632	0.195656	0.31649	0.0386548	0.00966464	0.180087	0.135716
1436	C	0.435308	0.489776	0.513845	0.572755	0.32606	0.127515	0.228216	0.132221	0.157048	0.196937	0.019425	0.0391466	0.189346	0.12527
1437	C	0.414988	0.32075	0.315638	0.297247	0.138208	0.0416031	0.198745	0.163867	0.108631	0.17596	0.0292769	0.00978953	0.0854284	0.12483
1440	C	0.405655	0.406354	0.155455	0.392157	0.061736	0.0791348	0.276781	0.322191	0.347893	0.376871	0.143403	0.0567054	0.114351	0.161533
1443	C	0.690156	0.437424	0.594333	0.636053	0.399516	0.0509749	0.133033	0.201776	0.12476	0.161221	0.0284414	0	0.131608	0.0754067
1453	C	0.393343	0.350877	0.32022	0.489182	0.165769	0.0706714	0.265497	0.145284	0.105363	0.236211	0.0412797	0.0628272	0.18685	0.137106
1460	C	0.281546	0.202405	0.210761	0.276873	0.102975	0.0339751	0.259336	0.111223	0.161874	0.205029	0.0571102	0.058674	0.14462	0.103496
1464	C	0.360924	0.356228	0.313298	0.370085	0.117208	0.0210682	0.210843	0.148046	0.0649471	0.146062	0.0186202	0	0.164474	0.102122
1467	C	0.505788	0.658032	0.669667	0.50813	0.493454	0.0498902	0.151362	0.12842	0.139899	0.220496	0.0187161	0.0200924	0.166798	0.117316
1468	C	0.162602	0.20141	0.159168	0.194634	0.0585309	0.0389294	0.110386	0.039285	0.120292	0.145712	0.00930665	0.0501404	0.155481	0.151798
1470	C	1.00185	0.620058	0.726603	0.638778	0.852783	0.148705	0.257045	0.149967	0.0975004	0.188567	0.0359002	0.0190913	0.149984	0.0771775
1471	C	0.276744	0.229257	0.237869	0.332062	0.113686	0.101755	0.244809	0.161045	0.160976	0.152861	0.00854044	0.00896379	0.247333	0.0624155
1472	C	0.351344	0.316372	0.218092	0.429079	0.113102	0.0842744	0.196534	0.185332	0.209908	0.263803	0.0674821	0.0177999	0.276923	0.205486
1482	C	0.415058	0.307449	0.340845	0.408365	0.12257	0.0681954	0.35615	0.299735	0.224308	0.321088	0.0504498	0.034382	0.143598	0.113274
1488	C	0.298385	0.383034	0.170871	0.389523	0.0844912	0.157393	0.280365	0.241265	0.166521	0.234694	0.11631	0.0184179	0.149582	0.143567
1493	C	0.350301	0.248114	0.374412	0.375343	0.116822	0.0389181	0.193834	0.202392	0.265722	0.251704	0.0543675	0.0186393	0.227661	0.189521
1501	C	0.753964	0.764126	0.741725	0.812065	0.52227	0.0409333	0.218694	0.170487	0.0910581	0.284153	0.0279746	0.0287742	0.261534	0.0956366
1502	C	0.279705	0.335264	0.179211	0.265448	0.159363	0.0309853	0.190785	0.152439	0.118711	0.120985	0.0652559	0.0576535	0.116218	0.107784
1503	C	0.449759	0.390195	0.342163	0.277089	0.173094	0.0397338	0.136849	0.172586	0.16636	0.209293	0.0254712	0.0270978	0.154004	0.101706
1512	C	0.381638	0.566859	0.459847	0.423481	0.271265	0.0792472	0.17192	0.354712	0.250487	0.307051	0.113995	0.0553301	0.227484	0.12825
1513	C	0.367377	0.339049	0.36228	0.349504	0.134276	0.100374	0.260902	0.25203	0.162822	0.319115	0.140218	0.103244	0.262595	0.157889
1518	C	0.489356	0.480824	0.348172	0.339641	0.382178	0.124766	0.236772	0.246812	0.319457	0.286636	0.0711934	0.00922339	0.259038	0.219941
1521	C	0.304221	0.347181	0.35531	0.436095	0.252419	0.119164	0.242437	0.199937	0.123216	0.245128	0.045106	0.0279434	0.188103	0.137655
1523	C	0.341556	0.443432	0.419452	0.298854	0.186896	0.140177	0.377953	0.250522	0.274614	0.331492	0.0890551	0.0734686	0.291886	0.275034
1525	C	0.369777	0.363253	0.378692	0.447213	0.22961	0.103918	0.470396	0.398	0.514241	0.37408	0.156182	0.144443	0.291414	0.283881
1527	C	0.390625	0.382009	0.406184	0.335458	0.206505	0.212517	0.276271	0.306247	0.196175	0.302737	0.138456	0.0634518	0.277008	0.27117
1529	C	0.53125	0.722394	0.660363	0.622615	0.360633	0.121359	0.239156	0.26928	0.206996	0.221729	0.0632969	0.00963298	0.272444	0.172482
1532	C	0.422421	0.36658	0.262995	0.394109	0.207216	0.0761325	0.223793	0.210896	0.189605	0.169492	0.00977422	0.0105552	0.146238	0.0867428
1534	C	0.355412	0.515386	0.353737	0.537634	0.230387	0.0505881	0.189798	0.129579	0.190711	0.312856	0.0393159	0	0.291622	0.131733
1538	C	0.496047	0.454479	0.414692	0.538922	0.201565	0.160474	0.275185	0.308386	0.42122	0.358886	0.0886263	0.0864865	0.218089	0.263814
1542	C	0.450668	0.705413	0.807704	0.581395	0.478176	0.0892971	0.232717	0.325115	0.257268	0.322113	0.0324921	0.0246579	0.19685	0.314102
1544	C	0.343025	0.423131	0.319132	0.380148	0.0865159	0.0258164	0.183021	0.224624	0.239712	0.2997	0.0110717	0.0765404	0.32107	0.272619
1547	C	0.272786	0.308071	0.329154	0.331194	0.0603064	0.0380904	0.292954	0.338484	0.208826	0.500864	0.124801	0.0395674	0.172003	0.286123
1553	C	0.687112	0.793265	1.02472	0.740579	0.711201	0.0394115	0.307377	0.277344	0.193424	0.198689	0.0768344	0	0.27674	0.19198
1554	C	0.431392	0.240964	0.371087	0.216967	0.188869	0.0769132	0.185779	0.0681663	0.143358	0.137336	0.0378263	0.0311429	0.174849	0.188917
1557	C	0.570835	0.586953	0.467368	0.455581	0.470404	0.1317	0.0350754	0.143472	0.116395	0.123052	0.026178	0.0161368	0.124189	0.10898
1558	C	0.331241	0.340483	0.319006	0.345702	0.197342	0.0262916	0.141593	0.145243	0.168124	0.0829016	0.0394322	0.0162075	0.179088	0.0438885
1559	C	0.387392	0.310613	0.525068	0.489054	0.254079	0.0533476	0.197557	0.239852	0.255842	0.211506	0.0798403	0.0165453	0.194283	0.133899
1562	C	0.354045	0.364015	0.186884	0.0942063	0.135099	0.0920326	0.197062	0.294388	0.221051	0.209336	0.0268528	0.0821288	0.0935204	0.150247
1564	C	0.551775	0.560984	0.530973	0.315457	0.45911	0.11274	0.182334	0.0419199	0.095057	0.259618	0	0	0.156006	0.0727802
1565	C	0.200109	0.196429	0.105245	0.215672	0.211984	0.0414651	0.0201207	0.186994	0.1322	0.0934143	0.0633312	0.0376932	0.111779	0.0481812
1568	C	0.465283	0.419654	0.256761	0.333095	0.239302	0.0826219	0.21322	0.165837	0.134251	0.228216	0.0592768	0.0176585	0.162404	0.151943
1572	C	0.135547	0.194584	0.143701	0.178571	0.137325	0.0414136	0.249727	0.209644	0.191543	0.182815	0.0405351	0.0494805	0.0794807	0.121753
1574	C	0.266241	0.347162	0.188163	0.211566	0.213969	0.046332	0.11294	0.184533	0.183542	0.226458	0.115423	0.0182116	0.12766	0.149573
1581	C	0.45529	0.481198	0.507259	0.527831	0.318103	0.0597729	0.153728	0.143175	0.149009	0.325497	0.0551496	0	0.161031	0.080402
1582	C	0.2574	0.395257	0.229926	0.363108	0.248248	0	0.155231	0.209272	0.0907304	0.164534	0.0549149	0.0174095	0.0446163	0.122299
1583	C	0.162426	0.161871	0.231111	0.265188	0.11539	0.0149499	0.123476	0.209441	0.167326	0.253761	0.0402414	0.0169233	0.133333	0.284149
1590	C	0.332226	0.38191	0.349578	0.467033	0.30722	0.0295946	0.149402	0.155898	0.101729	0.213344	0.0796178	0.0136874	0.146963	0.0454752
1591	C	0.378486	0.268097	0.400253	0.252809	0.196546	0.0442347	0.184936	0.139934	0.0857927	0.136505	0.0340561	0.0272257	0.0989772	0.136737
1592	C	0.24218	0.439883	0.363948	0.456751	0.212525	0.015006	0.152827	0.176647	0.20837	0.23636	0.03427	0	0.167673	0.138026
1593	C	0.202306	0.168103	0.0858553	0.114482	0.0707914	0.0448229	0.152646	0.158758	0.0868206	0.137795	0.0341103	0	0.033456	0.1146
1597	C	0.215193	0.336852	0.299608	0.419664	0.128608	0.0442217	0.207147	0.233729	0.249066	0.439122	0.0113779	0.0265182	0.187585	0.0913868
1609	C	0.218675	0.20843	0.237361	0.351803	0.0861821	0.0589188	0.348979	0.217195	0.0907441	0.42735	0.042653	0.0243427	0.104475	0.180018
1618	C	0.368852	0.384451	0.222965	0.483221	0.12366	0.0705219	0.288282	0.20968	0.15579	0.238616	0.0192031	0	0.166306	0.0888494
1626	C	0.669088	0.914513	0.696008	0.905205	0.671401	0.052687	0.421496	0.23645	0.327571	0.167715	0.0858451	0.0220167	0.165508	0.12285
1627	C	0.392017	0.441095	0.343905	0.473934	0.229358	0.0481058	0.0881523	0.0731395	0.0910084	0.0635055	0.046581	0.0107078	0.27637	0.124254
1628	C	0.327749	0.471254	0.37431	0.362494	0.338369	0.0954426	0.157667	0.162569	0.123127	0.140647	0.0383619	0.0219419	0.123343	0.0268456
1629	C	0.202057	0.25053	0.120385	0.219834	0.0360144	0.0472646	0.257124	0.155211	0.0900698	0.276869	0.0881834	0.0225581	0.201176	0.144259
1635	C	0.208136	0.388425	0.163132	0.2003	0.0684151	0.0203438	0.331596	0.220696	0.258331	0.137061	0.0704155	0.100044	0.139101	0.206917
1644	C	0.408052	0.376868	0.482121	0.605505	0.410936	0.0736317	0.252908	0.288184	0.0831486	0.282087	0.0799041	0.0223239	0.13089	0.167954
1645	C	0.460224	0.36391	0.43922	0.533144	0.229715	0.0563925	0.224831	0.180879	0.109589	0.195367	0	0.0110791	0.151515	0.0673401
1646	C	0.228659	0.304395	0.175044	0.207326	0.0726099	0.0158768	0.225282	0.129333	0.108696	0.168067	0.0699021	0.0224039	0.115354	0.101798
1655	C	0.39561	0.318588	0.389692	0.298193	0.180707	0.116628	0.281096	0.473485	0.426439	0.376547	0.229305	0.140467	0.311005	0.284991
1660	C	0.240577	0.396014	0.301442	0.429104	0.100411	0.0264294	0.280899	0.117316	0.0688231	0.354707	0.0244888	0	0.204525	0.0629723
1666	C	0.45279	0.343861	0.288298	0.485981	0.328617	0.00881057	0.159521	0.117279	0.170004	0.144823	0.0576635	0	0.114141	0.0963391
1670	C	0.460517	0.374194	0.384462	0.516351	0.166636	0.0267953	0.356339	0.16538	0.260598	0.230787	0.0813292	0.0127033	0.155159	0.0900901
1682	C	0.500473	0.531639	0.438416	0.550807	0.44554	0.0563169	0.428725	0.246219	0.236407	0.423634	0.0491461	0.0126566	0.149578	0.205339
1683	C	0.542741	0.455907	0.358225	0.667429	0.391072	0.0473306	0.295498	0.306435	0.243348	0.347675	0.0969932	0.0625078	0.110299	0.159681
1684	C	0.420453	0.455611	0.262358	0.438095	0.238914	0.0568882	0.134499	0.360007	0.355322	0.252101	0.0710227	0.0366256	0.207011	0.212028
1687	C	0.820942	0.932366	0.807985	1.23913	0.767734	0.184003	0.411311	0.281924	0.249415	0.240806	0.0126056	0.0384862	0.226025	0.135083
1688	C	0.550661	0.615523	0.611326	0.727193	0.461133	0.198895	0.204464	0.13104	0.200092	0.239756	0.0126759	0.012945	0.165344	0.0963763
1689	C	0.287265	0.455858	0.294166	0.536913	0.212695	0.0678733	0.117233	0.12837	0.196553	0.192885	0.075748	0.0386299	0.118886	0.132827
1696	C	0.528233	0.49374	0.231303	0.597868	0.249619	0.142203	0.1734	0.115645	0.245286	0.338906	0.170819	0.1012	0.207039	0.0580608
1698	C	0.258039	0.306044	0.355425	0.25196	0.216853	0.166205	0.161088	0.272063	0.218955	0.282885	0.091673	0.0154345	0.211138	0.156495
1700	C	0.583022	0.45683	0.335138	0.757326	0.369434	0.498591	0.444065	0.47055	0.25472	0.361664	0.181956	0.091352	0.408998	0.112317
1701	C	0.462208	0.401499	0.458295	0.568828	0.25653	0.44335	0.335909	0.368885	0.296648	0.402504	0.154321	0.182482	0.512328	0.200218
1703	C	0.297796	0.176263	0.204221	0.367797	0.13031	0.319211	1.17162	1.15251	1.02249	0.790514	0.996474	0.316694	0.137457	0.351062
1704	C	0.242522	0.384123	0.359712	0.338219	0.407332	0.0807428	0.101027	0.0640102	0.0740083	0.158049	0.0316056	0.0154036	0.208073	0.140944
1705	C	0.184417	0.248509	0.123457	0.257566	0.23663	0.361174	0.221126	0.112903	0.192936	0.0913034	0.0321234	0.0155982	0.362812	0.210711
1708	C	0.379747	0.538721	0.364631	0.653061	0.0676133	0.260926	0.274867	0.226978	0.222519	0.297483	0.0336644	0.016372	0.271444	0.193492
1710	C	1.11475	0.961538	1.33206	0.823045	0.973574	0.339213	0.237893	0.240269	0.191571	0.248531	0.0344947	0	0.334821	0.24403
1713	C	0	0.907821	0.392157	0.748752	0.857143	0.278358	0.277056	0.180981	0.256759	0.369004	0.0530598	0.0171292	0.615901	0.192712
1716	C	0.534045	0.824176	0.295858	0.655201	0.356633	0.0703235	0.277367	0.227114	0.113932	0.215569	0.0180148	0.0176429	0.333519	0.239102
1717	C	0.199734	0.340832	0.489237	0.408163	0.0706215	0.0702247	0.327451	0.155012	0.225189	0.283086	0.0177494	0.0174856	0.275482	0.145879
1738	C	0.863664	0.396563	0.582242	0.0788644	0.38835	0.177462	0.338083	0.189125	0.226552	0.307263	0	0.0263574	0.116618	0.133726
1739	C	0.137174	0.522778	0.156128	0.0904159	0.140056	0.19305	0.196415	0.192493	0.1146	0.142816	0.0481	0.0542299	0.121951	0.108225
1740	C	0.320366	0.444664	0.358423	0.375235	0.143335	0.16225	0.166548	0.164088	0.110473	0.241352	0.0460405	0.0546597	0.232378	0.283067
1742	C	0.281426	0.100908	0.153846	0.188679	0.144928	0.109111	0.224439	0.195456	0.231214	0.0553097	0.0963623	0.142126	0.156495	0.209699
1747	C	0.301659	0.109051	0.215285	0.208333	0.0517598	0	0.178891	0.118835	0.144217	0.0638162	0.116381	0.0353607	0.04158	0.18622
1750	C	0.398605	0.539665	0.373932	0.344116	0.359527	0.0586166	0.0646831	0.0980713	0.158983	0.138074	0	0.0381388	0.0824402	0
1751	C	0.758342	0.487541	0.481283	0.207756	0.258264	0	0.130463	0.165453	0.193361	0.13986	0	0	0.04158	0.16728
1752	C	0.101989	0.163221	0.266667	0.208623	0.363071	0.118343	0.0330797	0	0.0981997	0.0355999	0	0	0.0419111	0
1753	C	0.0502765	0.107701	0	0.137268	0	0	0	0	0.0658979	0	0.0329598	0	0.124533	0
1755	C	0.301356	0.375738	0.156822	0.206327	0.253807	0	0.131579	0	0.0636335	0.0346861	0.0321234	0.0407498	0.0824063	0.0681663
1756	C	0.0503018	0.107296	0.15674	0.206612	0.0508647	0.0581734	0.0995355	0.0998668	0.0322373	0.140007	0	0	0.123711	0.173913
1762	C	0.10101	0.16129	0.104767	0.0690608	0	0	0.0789266	0.0377216	0.0722282	0.0793651	0	0	0.0847817	0.0424809
1765	C	0.764916	0.867209	0.476695	0.768156	0.520833	0	0.19755	0.30303	0.21842	0.318218	0.141593	0	0.130719	0.0429923
1766	C	0.564103	0.711549	0.532481	0.422833	0.157812	0	0.324675	0.279916	0.261952	0.221157	0.0656814	0	0.176056	0.25198
1767	C	0.254194	0.27027	0.263435	0.420757	0.10352	0	0.405077	0.300677	0.261967	0.365075	0.0245339	0	0.0847458	0.164165
1769	C	0.152983	0.16331	0.318134	0.282885	0	0	0.0266028	0.0739645	0.11773	0.151653	0	0	0	0.0695733
1772	C	0.295712	0.468262	0.504286	0.615595	0.631068	0	0.0956389	0.0719036	0.016728	0.229674	0.0353357	0	0.040568	0.0186951
1773	C	0.246184	0.259875	0.906344	0.341064	0.193143	0	0.112233	0.123719	0.0819269	0.0678733	0.0870625	0.0528541	0.040568	0.0553914
1774	C	0.292255	0.36157	0.0992063	0.203252	0.330189	0	0.0541908	0.0511335	0.0315408	0.044082	0	0.0172384	0.200481	0.0358938
1778	C	0.185271	0.0486855	0.0948317	0.322789	0	0	0.12432	0.0730034	0.0815661	0.0796178	0	0	0.147874	0.0616713
1783	C	0.278293	0.244021	0.380228	0.129032	0.131579	0.049456	0.135216	0.141323	0.157874	0.253461	0.0148743	0.0444444	0.0737735	0.135522
1785	C	0.50598	0.53012	0.235738	0.571429	0.389273	0.0975134	0.128848	0.121163	0.1998	0.0912242	0.0139179	0	0.363636	0.174191
1794	C	0.321839	0.481928	0.094697	0.188679	0.0433463	0	0.180656	0.249475	0.232189	0.28551	0.013637	0	0.0367647	0.0432152
1798	C	0.369174	0.241313	0.331754	0.632911	0.0877193	0	0.276549	0.247557	0.18184	0.177242	0.0273486	0.0138293	0.110173	0.228866
1802	C	0.324525	0.291404	0.143678	0.127389	0.222222	0	0.247219	0.0777907	0.19319	0.247306	0	0	0.148313	0.199402
1807	C	0.415129	0.289296	0.331283	0.317259	0.219106	0	0.287317	0.232528	0.217129	0.282436	0.0136893	0	0.366166	0.155697
1811	C	0.551217	0.434783	0.469263	0.379267	0.216732	0	0.274801	0.298857	0.230471	0.37234	0.0274537	0	0.219138	0.113507
1828	C	0.401376	0.296736	0.112676	0.617761	0.259202	0	0.659736	0.574257	0.437557	0.708475	0.491033	0.152827	0.199601	0.482111
1833	C	0.0832639	0.260191	0	0.108342	0.509091	0.18797	0.0720721	0.105597	0.165017	0.192585	0.0417362	0.0478927	0.219298	0.0422833
1841	C	0	0.389105	0.340136	0	0.257069	0	0.491159	0.868726	0.530504	0.53135	0.099108	0.25641	0	0.404313
1842	C	20.1681	22.3577	13.1944	6.35593	0.265252	0.406504	39.4523	31.1817	29.6903	12.3228	0.101215	0.132802	14.4092	27.8689
1852	C	0	0	0	0	0	0	0	0	0.395257	0	0	0	0	0
1853	C	0	0	0	2.85714	0	0	0	0.947867	0	0	0	0	0	0
1856	C	0	0	0	0	0	0	0	0	0	0	0	0	0	0
1865	C	0	0	0	5	0	0	2.27273	0	0	0	0	0	0	2.38095

## Sheet: G>A
18s location	forward strand reference base	WT NaBH4 2-NH2-d-ATP HIV	75% WT NaBH4 2-NH2-d-ATP HIV	50% WT NaBH4 2-NH2-d-ATP HIV	25% WT NaBH4 2-NH2-d-ATP HIV	WT untreated 2-NH2-d-ATP HIV	WT untreated dNTPs HIV	WT NaBH4 d2-NH2-d-ATP SSIV	75% WT NaBH4 dNH2-ATP SSIV	50% WT NaBH4 2-NH2-d-ATP SSIV	25% WT NaBH4 2-NH2-d-ATP SSIV	WT untreated 2-NH2-d-ATP SSIV	WT untreated dNTPs SSIV	WT NaBH4 dNTPs HIV	WT NaBH4 dNTPs SSIV
6	G	0	0.809717	0.760456	1.1976	0.31348	1.83486	2.73973	1.38889	0.680272	3.07692	1.76991	0	1.51515	2.7027
7	G	0	0	0.301205	0	0.266667	0	0	0	0	0	0	1.53846	0	0
10	G	1.3986	0	0.527704	1.16279	0.236967	1.21212	1.52672	1.5748	0.888889	0	1.11111	2.66667	0	1.72414
16	G	0.0954198	0	0	0.130039	0.243112	0	0.0205465	0.0193949	0.0652316	0	0.041425	0	0.14556	0
20	G	0.257235	0.065445	0	0.0935454	0.180072	0	0.0310029	0	0	0.0171527	0.0152952	0	0.215285	0
23	G	0.0584454	0.121507	0.124533	0	0.112296	0.101626	0	0.0566813	0	0.0319387	0.0287109	0.124316	0.0962464	0.0777202
29	G	0.0536193	0	0.0588928	0.0808407	0	0.0772201	0.0129116	0.0125534	0.0265993	0	0	0	0.152091	0
33	G	0	0.0509684	0.432199	0.0728863	0.0479157	0	0.0113071	0.0334411	0	0	0.0114482	0	0.123457	0
41	G	0.0725953	0.121556	0.0902935	0	0.0388199	0	0.00866927	0.0168677	0.0186133	0.0186585	0	0.010543	0	0.0217675
47	G	0.210379	0.194553	0.0877963	0.163845	0.150376	0.0468384	0.0159808	0.00786535	0	0.00858885	0.0161342	0	0.0437063	0
52	G	0.201884	0.11169	0.0858369	0.104657	0.10921	0	0.0150455	0.0223697	0.00815927	0.0322711	0.00766166	0	0.0835073	0.0188733
56	G	0.192493	0.106082	0.082713	0.099552	0.210084	0.0872981	0.00721501	0.0143318	0.0156998	0.0153775	0.0147232	0	0.0402253	0.0181835
62	G	0.125235	0.103842	0.0408998	0.146056	0.104493	0.126904	0.00703631	0.0139978	0.00764701	0	0.0143297	0	0.235018	0.0175747
66	G	0.063593	0.178955	0.173385	0.197922	0.222305	0.0429369	0.0139053	0	0.0227946	0.00736594	0	0.025244	0.200481	0.0173837
70	G	0.0859353	0.0641643	0.195848	0.0431593	0.13089	0.0363636	0.0410565	0.0135538	0.0149065	0.0288934	0.0277894	0.0163372	0.10218	0.025428
71	G	0.135906	0.213025	0.293686	0.282031	0.309023	0.208768	0.0340229	0.0202252	0.0222272	0.0143709	0.0275881	0.0162259	0.294118	0.0253079
74	G	0.237592	0.148412	0.070922	0.112655	0.0302939	0	0.0486894	0.00823723	0.0353357	0.00824266	0.0246771	0.0188342	0.0308833	0.00953198
75	G	0.238474	0.0595948	0.323858	0.225819	0.152812	0.266223	0.00860289	0	0.0186445	0	0.0172951	0	0.243977	0.0197141
80	G	0.0819448	0.12147	0.0764234	0.194553	0.196528	0.0316857	0.0101792	0.0204792	0.0225352	0.0201613	0.0307503	0	0.0898473	0.0422297
82	G	0.0256279	0.169924	0.0361402	0.182282	0.240674	0.090307	0.192094	0.19366	0.213244	0.13979	0.161812	0.179856	0.115407	0.197793
88	G	0.0642674	0.0232612	0.121803	0.12184	0.10005	0.135135	0.0104341	0.0104789	0	0.0203025	0	0.040729	0.0262536	0.0105407
90	G	0.0210793	0.113507	0.0602047	0.0894188	0.0487567	0.0553403	0.0230894	0	0.0250188	0.0658906	0.0111321	0.0228624	0.0275028	0.0356041
94	G	0.0951475	0.140873	0.107181	0.0533333	0.130067	0.159405	0.0114863	0.0114181	0.0123548	0.0547106	0	0.0112918	0.161247	0.011812
95	G	0.220548	0.191865	0.0508776	0.102512	0.123482	0.08	0.0352775	0.0700689	0.075959	0.0445038	0.0224593	0.0468439	0.0546001	0.0490196
108	G	0.101729	0.103566	0.137309	0.0804667	0.138568	0.0426167	0.0213767	0.0107388	0.0230362	0.0304198	0	0.0129149	0.0226398	0.0378884
113	G	0.042331	0.0142857	0.037594	0.0580833	0.0588582	0.0205465	0.0215726	0.0107643	0.0117481	0.0202901	0	0	0.066357	0
114	G	0.0691563	0.237463	0.0918105	0.0570885	0.114728	0.0795229	0	0.0106326	0.0116198	0	0.00981451	0.0128932	0.0218007	0.0125755
122	G	0.0394425	0.105904	0.051966	0.16129	0.053234	0.0188893	0.0202204	0.030015	0.0222445	0	0.0282273	0	0.164914	0.0119847
123	G	0.209463	0.13714	0.145396	0.101368	0.236318	0.0537153	0.0183739	0.00912242	0.0407664	0	0.0172087	0	0.134953	0
126	G	0.0802752	0.0694444	0.073888	0.0955718	0.0805895	0.116608	0.0164352	0.040783	0.0739782	0.0651201	0.0311066	0	0.035926	0.0516742
130	G	0.0577701	0.0583022	0.0894855	0.111041	0.162488	0.0171409	0.101349	0.0620251	0.0353576	0.0545044	0.0669593	0	0.127714	0.0100402
145	G	0.0500375	0.0380469	0.11325	0.0171792	0.0629247	0.0390472	0.0155982	0.0157841	0.00908843	0.031977	0.0155159	0.0115554	0.019857	0.0107782
146	G	0.129651	0.0656082	0.18227	0.0532292	0.116807	0.0204457	0.00791327	0.0160449	0.0555813	0.0162101	0.0236948	0.0237869	0	0.0332189
153	G	0.121572	0.124035	0.0856311	0.12975	0.0684744	0.0662252	0.0876494	0.0810176	0.122146	0.0988142	0.112054	0.0615233	0.0214777	0.114811
155	G	0.0701951	0.101715	0.0359906	0	0.0572902	0.0446728	0.100565	0.0868398	0.1187	0.089293	0.0705716	0.024216	0.0868432	0.102018
156	G	0.184712	0.221926	0.163517	0.0991277	0.158501	0.0664599	0.0702192	0.0639744	0.119496	0.0578465	0.0635728	0.0484379	0.0654165	0.0686735
165	G	0.0721501	0.030012	0.0547445	0.0802568	0.0732923	0	0.283063	0.322425	0.303309	0.330722	0.240597	0.134484	0	0.0222618
167	G	0.0996158	0.145243	0.125583	0.119166	0.112978	0.0985707	0.0545455	0.0641849	0.061237	0.0503931	0.0818033	0.0246548	0.10627	0.038373
177	G	0.583288	0.507471	0.519993	0.580742	0.42978	0.484496	0.784886	0.625633	0.526002	0.625256	0.472485	0.513419	0.978877	0.564361
180	G	0.330285	0.277557	0.327417	0.242173	0.160342	0.227324	0.694567	0.565271	0.729381	0.581337	0.493871	0.935494	0.296956	0.793742
183	G	0.169183	0.134102	0.22309	0.255145	0.164002	0.133541	0.378617	0.436522	0.352211	0.345441	0.263541	0.40594	0.178299	0.512582
184	G	0.377003	0.361764	0.136879	0.4563	0.283206	0.229621	0.346507	0.474789	0.513845	0.412461	0.359712	0.39156	0.551181	0.564972
185	G	0.16554	0.340281	0.36371	0.534283	0.201787	0.350222	0.278873	0.391389	0.292626	0.412946	0.253832	0.299235	0.353549	0.298543
187	G	0.454212	0.420357	0.243848	0.238927	0.284687	0.286055	0.271439	0.356961	0.236174	0.346821	0.200541	0.177976	0.338454	0.180094
190	G	0.0739426	0.105501	0.111259	0.129127	0.0148017	0.0707714	0.0208377	0.0316656	0.0298478	0.0720548	0.0102902	0.0111694	0.0246609	0.0369549
200	G	0.0548546	0.0672585	0.124135	0.0838785	0.0388149	0.0601685	0.0108838	0	0.010015	0.0125849	0.0103306	0	0.0737327	0
202	G	0.0261165	0.0254065	0	0.0800256	0.0486973	0.0744048	0	0.0218079	0.0397456	0.0251984	0	0.0322824	0	0.0502386
203	G	0.0387347	0.050163	0.0790139	0.0948467	0.0360058	0.0733541	0.0326158	0.0868432	0.0689995	0.0377739	0.123533	0.107124	0.064704	0.0125172
204	G	0.0973947	0.105721	0.0286985	0.0745379	0.0335833	0.0666001	0.0631778	0.126263	0.0663948	0.146306	0.10917	0.145168	0.0433839	0.085003
205	G	0.0595451	0.0804043	0.0976562	0.0878477	0.0328048	0.0322321	0.0420521	0.0418892	0.056301	0.0242748	0.0592359	0.0721278	0.0975202	0.0241284
206	G	0.164339	0.0902222	0.164294	0.158983	0.0537346	0.0473485	0.0104428	0.06226	0.0371402	0.0844798	0.0195944	0	0.0678242	0.0358895
207	G	0.116741	0.179312	0.149457	0.201555	0.149829	0.0157085	0.0519534	0.0516796	0.0832101	0.0240645	0.0195293	0.0102386	0.0809389	0.0119474
208	G	0.256231	0.301609	0.44661	0.402472	0.352301	0.172306	0.0207447	0.0412669	0.0184213	0.0120005	0	0.0204708	0.134192	0.0476588
211	G	0.127226	0.0885838	0.107484	0.128682	0.138254	0.0779059	0.103488	0.133883	0.127936	0.0360187	0.0680338	0.0408247	0.0666045	0.047619
213	G	0.0637078	0.0407456	0.0730105	0.0523492	0.0493827	0.0895522	0.0284603	0.0375446	0.0163546	0.0110461	0.0176616	0.0195351	0.0626881	0.0228938
215	G	0.257483	0.297802	0.293255	0.183126	0.230392	0.178306	0.0296765	0.0876937	0.0336474	0.0569736	0	0.0397377	0.318745	0.0352195
225	G	0.0236574	0.0457143	0.0653424	0.0425472	0.046307	0	0.011236	0.0445236	0.0741359	0.0389105	0.0836733	0.03517	0.0679733	0.0539374
240	G	0.238411	0.201131	0.0817996	0.144023	0.137345	0.127857	0.182726	0.169944	0.161698	0.214715	0.172891	0.175395	0.154287	0.13947
241	G	0.266809	0.251477	0.161421	0.337566	0.261487	0.205859	0.193213	0.288983	0.321285	0.226983	0.262228	0.257227	0.22846	0.218699
245	G	0.27907	0.260832	0.130947	0.340393	0.22409	0.0881523	0.0966984	0.134862	0.111657	0.130145	0.113679	0.0960879	0.138712	0.153586
255	G	0.0412145	0.0518807	0.0548772	0.102652	0.0866658	0.137258	0.0331162	0.0327332	0.0754219	0.0130548	0.0404449	0.044405	0.078405	0.025047
256	G	0.346069	0.117264	0.221576	0.137292	0.211812	0.2792	0.0334001	0.0659776	0.0285307	0	0.0204436	0.0227531	0.150359	0.0126984
261	G	0.063743	0.0731529	0.070502	0.0655201	0.0957854	0.0304925	0.0423325	0.073383	0.0367006	0.0252781	0.0198216	0.0333593	0.0845819	0
262	G	0.178663	0.294659	0.216014	0.147953	0.14498	0.109187	0.0105742	0.0104635	0.0184162	0.0126103	0	0.0111869	0.212527	0.0364653
265	G	0.0775394	0.0755477	0.0463392	0.0503609	0.0382068	0.0167616	0.0106157	0.020949	0.0188448	0.0249439	0.010015	0.011325	0.0547645	0.0121877
266	G	0.0905094	0.101291	0.109085	0.117865	0.0770416	0.0845166	0	0.0315524	0	0.0375328	0.0201126	0.0113353	0.0139548	0
267	G	0.0774293	0.0505625	0.171233	0.117332	0.0640123	0.0168322	0.0640273	0.0629195	0.0378573	0.024854	0.100241	0.056338	0.0279408	0.0364564
268	G	0.090009	0.0252048	0.0932111	0.0166917	0.0381485	0.0167757	0.0212247	0.0208594	0.0282992	0.0247617	0.00997307	0.0224266	0.0558971	0.0241604
269	G	0.0897436	0.113208	0.154871	0.0332447	0.190186	0.0334728	0.0105597	0.0207361	0.0187512	0.036855	0.0099295	0.0111582	0.069735	0
270	G	0.192258	0.150981	0.185672	0.165975	0.240142	0.0333946	0.0210748	0.0103359	0.0281162	0.0366569	0.0197844	0.0442625	0.0417072	0.0119503
272	G	0.0267308	0.0662164	0.0165563	0.017331	0.0265745	0.0674764	0.0223564	0.0109999	0.0200783	0	0.0416363	0	0.0711642	0
273	G	0.109096	0.189471	0.119088	0.159574	0.244798	0.119925	0.0227299	0.0112145	0.0412797	0.0128271	0.0212359	0	0.0873235	0
274	G	0.151473	0.204722	0.257909	0.125268	0.164835	0.0517152	0.0114194	0.045162	0.0208464	0.0385802	0.0106963	0.0225912	0.147189	0.0242689
276	G	0.0828157	0.0686153	0.173853	0.0895736	0.0827244	0.0526963	0.034087	0.0112296	0.0103885	0.0511902	0.0426621	0.02297	0.120609	0.0245098
279	G	0.094518	0.0675037	0.13701	0.104932	0.12131	0.119822	0.0439174	0.0108073	0.019996	0	0.0206889	0.0224165	0.0442087	0.0120178
280	G	0.160836	0.13403	0.17059	0.190608	0.200965	0.153531	0.0218675	0	0.00993049	0.0248355	0.0103008	0.0557724	0.0583345	0.0119832
282	G	0.0688326	0.0826674	0.0357015	0.0712251	0.0826902	0.0716974	0.033389	0.043535	0.0304044	0	0	0.0230388	0.124688	0
283	G	0.179781	0.18033	0.143911	0.196815	0.165837	0.05386	0.0558909	0.043802	0.0306435	0.100959	0.0421852	0.023116	0.124708	0.0125929
288	G	0.0833333	0.0694348	0.035524	0.0179953	0.0946714	0.0175531	0.0115727	0.0339175	0.0308515	0.0129836	0.0428725	0.0121271	0.0904704	0.0534688
289	G	0.137931	0.096565	0.193424	0.124577	0.134174	0.0526501	0.0114995	0.0224669	0.010203	0.0259168	0.0213356	0	0.0899146	0
291	G	0.0627746	0.0621968	0.0313676	0.048646	0.0925069	0.0450789	0.0325556	0.0317931	0.0381971	0.0121227	0	0.0113649	0.118064	0.0252016
298	G	0.0755358	0.120638	0.107514	0.0730194	0.10057	0.0466799	0.0172652	0.00851499	0.0235257	0.0201796	0.032457	0.0654083	0.042261	0.0530335
307	G	0.495854	0.434449	0.369293	0.487211	0.452381	0.268911	0.700329	0.612439	0.675139	0.587649	0.882157	0.790594	0.446429	0.677552
308	G	0.416775	0.344768	0.374617	0.515579	0.265124	0.370326	0.641425	0.621725	0.618741	0.49403	0.629365	0.699746	0.425351	0.599562
309	G	0.527728	0.45904	0.442169	0.412324	0.401639	0.364254	0.410869	0.398665	0.396424	0.354039	0.408274	0.380739	0.349002	0.278991
312	G	0.151458	0.258852	0.155113	0.121036	0.142594	0.0971109	0.0931532	0.102345	0.140787	0.108648	0.0990812	0.0997009	0.186875	0.0363592
316	G	0.184809	0.304196	0.184779	0.282952	0.298582	0.154762	0.089823	0.142653	0.137429	0.116972	0.166331	0.127986	0.192205	0.0830861
320	G	0.233281	0.244109	0.327273	0.279296	0.293965	0.206687	0.0637639	0.0901469	0.0977358	0.0426849	0.105829	0.0636267	0.127551	0.0712758
327	G	0.039185	0.112349	0.128821	0.0959923	0.118514	0.168573	0.0357494	0.0798226	0.0789952	0.0211461	0.0172176	0.0410004	0.0305623	0.057924
329	G	0.0393314	0.0657215	0.0468604	0.0842156	0.067929	0.0604084	0.00891902	0.0265322	0.0391359	0.0635122	0.0171204	0.0205002	0.040729	0.0116144
330	G	0.255679	0.20634	0.163973	0.155988	0.238176	0.132866	0.0536241	0.00887075	0.0549364	0.0318404	0.0344501	0.0206804	0.122287	0.0467235
332	G	0.0491739	0.0563592	0.0467836	0.0479962	0.0510682	0.0242424	0.0176929	0.0350539	0.015647	0.0105341	0.0257976	0	0.0407706	0.0232045
333	G	0.196676	0.215719	0.187069	0.215853	0.204307	0.0728332	0.0353669	0.0613927	0.046952	0.0210904	0.0430737	0.0103864	0.10201	0.0580585
335	G	0.0685401	0.103122	0.0702001	0.108121	0.0596405	0.0242748	0.00862292	0.0257511	0.00772977	0.0101792	0.0509295	0	0.0511404	0.0112575
338	G	0.0596007	0.0664515	0.0354568	0.0244111	0.0864155	0.0371379	0	0.0086881	0.0156912	0.0102501	0	0.0104004	0.0104167	0
347	G	0.102354	0.0537249	0.0549813	0.0807661	0.0831601	0.0961307	0.00788271	0.0157493	0.00711541	0.0369515	0.0235276	0.0189934	0.0300481	0.0301568
351	G	0.1111	0.146958	0.108748	0.0499625	0.12445	0.128829	0.0666389	0.0498795	0.0903751	0.07895	0.0587544	0.0823893	0.129503	0.0543183
355	G	0.263418	0.19384	0.346991	0.229699	0.380766	0.21022	0.320513	0.511275	0.427454	0.40847	0.383142	0.588235	0.20836	0.267318
370	G	0.0725295	0.0705716	0.0613121	0.0441306	0.132777	0.101755	0.0650336	0.0531971	0.10243	0.0369777	0.0745633	0.0517464	0.0746965	0.0639632
373	G	0.0378286	0.0371609	0.0655451	0	0.0585594	0.106468	0.0343603	0.0339712	0.0299133	0	0.0694284	0.0138927	0	0
374	G	0.324737	0.261682	0.155314	0.162904	0.157449	0.133833	0.0802108	0.0566123	0.0498355	0.0510465	0.0578637	0.0139256	0.0956389	0.0668181
377	G	0.216263	0.0869187	0.201359	0.261712	0.15625	0.165399	0.0354484	0	0.0307535	0.0527009	0.0235849	0.0711744	0.0658183	0.0274048
380	G	0.180832	0.160846	0.211249	0.0545554	0.16631	0.173732	0.130178	0.105895	0.187091	0.132013	0.200566	0.142633	0.15748	0.19305
383	G	0.138472	0.0236798	0.0554631	0.0560695	0.100326	0.0359971	0.0719252	0.0712251	0.0740114	0.0133887	0.0476985	0.0436618	0.0231267	0.0139899
385	G	0.0248447	0.0262329	0.189573	0.152672	0.171821	0	0.0250031	0.0621968	0.0783611	0.027828	0.0250973	0.0920952	0.0250188	0.0145603
394	G	0.0246488	0.0771803	0.0303398	0.0304878	0.027972	0.0366032	0.0892743	0.0759205	0.0453309	0	0.115548	0.0460052	0.0718391	0.043802
395	G	0.170275	0.0763359	0.20933	0.090009	0.13816	0.0722804	0.0871948	0.0865587	0.088741	0.0412088	0.138487	0.0300075	0.189215	0.0143493
397	G	0.0727802	0.25208	0.178678	0.14979	0.192997	0.289436	0.234192	0.245128	0.242104	0.150458	0.300639	0.148898	0.118878	0.0572656
403	G	0.178754	0.321027	0.259067	0.25413	0.176939	0.312256	0.420886	0.34076	0.450184	0.303907	0.456437	0.299307	0.182292	0.181132
404	G	0.288034	0.327243	0.266134	0.45425	0.270027	0.197394	0.174076	0.466107	0.543478	0.369004	0.340275	0.397141	0.292709	0.168016
405	G	0.424178	0.361714	0.587422	0.462504	0.184672	0.4423	0.13508	0.255411	0.343474	0.207869	0.247525	0.272829	0.376952	0.153327
407	G	0.536875	0.316912	0.4914	0.723888	0.424886	0.590087	0.265363	0.443091	0.378501	0.316647	0.624734	0.435146	0.535189	0.259403
410	G	0.0470367	0.0239866	0.149209	0.175029	0.105263	0.162549	0.202455	0.339324	0.397847	0.269107	0.39185	0.214035	0.14161	0.172861
411	G	0.179533	0.2292	0.0283046	0.168824	0.296077	0.177148	0.235382	0.185185	0.39157	0.197707	0.257732	0.253052	0.149893	0.292765
412	G	0.0886918	0.0676743	0.111576	0.16802	0.0721674	0.145138	0.111982	0.160177	0.209278	0.198597	0.273758	0.209205	0.0841751	0.0838223
413	G	0.0664158	0.178731	0.220083	0.111919	0.0704556	0.0283768	0.25468	0.364872	0.419162	0.162294	0.429819	0.320905	0.0834028	0.357041
419	G	0.0450857	0.118151	0.0548647	0.096918	0.111483	0.0389181	0.100852	0.0887902	0.0978155	0.0730549	0.0733317	0.0684838	0.0745156	0.154919
420	G	0.100143	0.0843526	0.139082	0.148148	0.122026	0.0377715	0.0560475	0.0775967	0.109733	0.0121877	0.0497451	0.0555942	0.0146391	0.0920931
421	G	0.0260247	0.102525	0.0951777	0.135985	0.111747	0.0344175	0.0870701	0.0972552	0.0759878	0.035621	0.0123396	0.0692617	0.0670241	0.0389206
425	G	0.0312533	0.0304661	0.0500438	0.0275217	0.0110742	0.0140627	0.0103423	0.0522794	0.0730232	0.0113494	0.0594248	0.0811908	0.0466581	0.0251731
431	G	0.0892061	0.0959877	0.0706464	0.0778008	0.1048	0.130412	0.160272	0.163465	0.272948	0.155125	0.18648	0.118033	0.107608	0.0847971
432	G	0.10846	0.123857	0.0818426	0.129032	0.166997	0.0646914	0.189318	0.223509	0.29225	0.231405	0.279102	0.169757	0.0853971	0.19326
434	G	0.117028	0.0849137	0.113097	0.0769922	0.093838	0.0663042	0.103445	0.125865	0.136698	0.102787	0.098268	0.138045	0.0554447	0.139736
436	G	0.0990982	0.124058	0.0801925	0.14381	0.149445	0.107599	0.0837258	0.0848896	0.0850883	0.0918063	0.138365	0.197322	0.147042	0.19305
437	G	0.109605	0.105344	0.0686892	0.170963	0.0856256	0.107933	0.0630782	0.0640342	0.118089	0.0923148	0.152808	0.100387	0.0683527	0.0652231
438	G	0.139693	0.114778	0.0571886	0.105291	0.0748503	0.0404149	0.0942211	0.10661	0.139276	0.0921022	0.140235	0.157955	0.0683995	0.0911933
440	G	0.109726	0.19064	0.136628	0.0659718	0.0427305	0.0673854	0.0729167	0.0316623	0.0747464	0.0343328	0.153807	0.0580299	0.0799087	0.10543
444	G	0.029294	0.0187494	0.0670841	0	0.0210548	0.0264725	0.0292683	0.0198708	0.0303306	0.021347	0.0243784	0.0417304	0.0224467	0.0249594
446	G	0.0570342	0.0813082	0.0859014	0.0125203	0.0509736	0.050665	0.259548	0.218735	0.400625	0.336391	0.1989	0.223097	0.0430432	0.154468
451	G	0.0820195	0.112877	0.0931002	0.0839631	0.0883306	0.0859634	0.0786713	0.0720851	0.149309	0.0866301	0.100212	0.0629564	0.0209842	0.0340252
452	G	0.182916	0.296814	0.353688	0.204893	0.326474	0.172925	0.175809	0.163177	0.254501	0.125957	0.134559	0.266025	0.158278	0.126002
466	G	0.305047	0.364574	0.397038	0.441718	0.541625	0.357671	0.0650936	0.103004	0.13655	0.154167	0.0314895	0.0835223	0.55919	0.12517
467	G	0.038117	0.0734754	0.0775537	0.0379075	0.0520996	0.103026	0.159664	0.16916	0.16226	0.151688	0.384827	0.335196	0.055991	0.229333
470	G	0.624876	0.63176	0.504877	0.418958	0.636187	0.707138	0.149254	0.233013	0.231458	0.137972	0.126379	0.195236	1.09712	0.263399
471	G	0.308293	0.365288	0.403848	0.257278	0.482441	0.281413	0.153291	0.163572	0.218659	0.172589	0.28585	0.341018	0.407861	0.229109
474	G	0.879168	0.762336	0.852378	0.676247	0.794592	0.666568	0.663697	0.625	0.579069	0.691619	0.797005	0.817968	0.82805	0.852619
477	G	0.327639	0.533001	0.45511	0.470124	0.492349	0.428407	0.421554	0.632349	0.714514	0.530288	0.607607	0.830635	0.4034	0.521286
478	G	0.987776	0.96578	1.50115	1.16094	1.28815	1.46462	0.983917	1.01958	1.28897	0.996538	1.28837	1.00428	1.36795	0.868213
480	G	0.428643	0.499634	0.528479	0.423384	0.541465	0.517857	1.02683	0.962503	1.38534	0.787885	1.10894	1.20842	0.900481	0.808693
482	G	0.326334	0.5755	0.579662	0.492431	0.769724	0.371893	0.495512	0.546835	0.465954	0.40904	0.496068	0.237696	0.369686	0.311371
499	G	0.0557414	0.210809	0.170773	0.0930882	0.134018	0.0474496	0.037886	0.0611247	0.084122	0.0206505	0.0575043	0.0255265	0.0770416	0.0459137
504	G	0.0482005	0.082672	0.146138	0.141015	0.112782	0.137552	0.0718972	0.2055	0.188324	0.0787634	0.194847	0.0962696	0.167862	0.0773737
505	G	0.16116	0.200971	0.169205	0.120773	0.131976	0.0591716	0.253256	0.267142	0.239187	0.198196	0.228311	0.256316	0.21225	0.233879
506	G	0.229659	0.190344	0.196678	0.28777	0.173947	0.143003	0.240207	0.15009	0.129585	0.110999	0.176173	0.148773	0.216718	0.112562
507	G	0.251256	0.32097	0.180302	0.271455	0.156986	0.0413565	0.120941	0.0608026	0.10013	0.0816827	0.0333519	0.0251477	0.0469925	0.04561
509	G	0.0851354	0.0723589	0.0454545	0.126877	0.118835	0.0417798	0.0371851	0.0503778	0.0693687	0.0611933	0.0111049	0.0251477	0.455116	0.0803766
510	G	0.12094	0.128464	0.160256	0.193092	0.160739	0.062383	0.0189735	0.0204625	0.0300541	0	0.0448783	0.0253261	0.092707	0.0231428
513	G	0.102529	0.126103	0.110791	0.190355	0.0785238	0.0412031	0.0385765	0.0619579	0.0302267	0.0419068	0.112982	0.0387797	0.121286	0.0711069
515	G	0.0336134	0	0	0.104102	0.0579262	0.0411777	0.0879937	0.0730536	0.08121	0.074476	0.114312	0.053312	0.0303859	0.0856688
518	G	0.0369004	0.0982077	0.0700967	0.0597639	0.0914794	0.016469	0.257192	0.189962	0.225522	0.151515	0.128811	0.142746	0.0483559	0.120395
534	G	0.150572	0.0975229	0.192287	0.0733317	0.122486	0.0548471	0.0579766	0.0822199	0.0861491	0.0923361	0.0980392	0.0801068	0.0945279	0.0878183
535	G	0.125471	0.141486	0.185772	0.166092	0.13654	0.0708115	0.0905524	0.117559	0.0788721	0.0319795	0.0679733	0.0279916	0.0762943	0.0131544
544	G	0.0528877	0.0817996	0.010917	0.0391338	0.0638298	0.0721813	0.0103616	0.022581	0	0	0.0118723	0.0146242	0.0326833	0
546	G	0.0315623	0.0814001	0.0651042	0.090803	0.0739958	0.0287894	0	0	0	0.0108378	0.0118343	0	0.0758725	0.0267989
547	G	0.0315093	0.111584	0.119009	0.0517732	0.158211	0.10056	0.0208659	0.0226757	0.0217794	0.032769	0.0118779	0.0294551	0.064928	0.0272294
552	G	0.167979	0.0905159	0.0318708	0.0258164	0.0731376	0.0718804	0.0303674	0.0216802	0.0310752	0.0315457	0	0.029163	0.0749064	0.0134644
558	G	0.0203211	0.0482532	0.0306279	0.0501882	0.0808898	0.0138217	0.0186567	0.0101153	0.0195886	0.0097972	0.0106667	0	0.0206143	0.0375094
559	G	0.101204	0.0960984	0.152455	0.112542	0.0704084	0	0.0462107	0.0200622	0.0194799	0.0387672	0.0211595	0.0536841	0.0411015	0.049401
563	G	0.0844505	0.0402455	0.0745633	0.091611	0.0317797	0.0601594	0.159141	0.119164	0.149461	0.0822538	0.0564653	0.101039	0.0453104	0.0785855
565	G	0.0929752	0.227858	0.0948567	0.190743	0.156071	0.148898	0.242014	0.255918	0.212022	0.209706	0.143694	0.0143123	0.101374	0.153925
586	G	0.0942285	0.0358938	0.0547495	0.0436936	0.03884	0.0368868	0.0448109	0.0200361	0.031263	0.0183184	0.0308166	0.0361359	0.055325	0.0112448
588	G	0.0947755	0.145208	0.0691467	0.16035	0.237498	0.0374462	0.0265816	0.0493632	0.0102438	0.00906536	0.0204019	0.0473149	0.0689941	0.033087
589	G	0.084074	0.0245489	0.0420816	0.0738443	0.133333	0.0192382	0.0627353	0.0500501	0.0831947	0.0183908	0.0207104	0.0238663	0.0141383	0.0222891
597	G	0.138447	0.215641	0.0998835	0.271463	0.188117	0.13922	0.119617	0.0721501	0.136626	0.105213	0.170995	0.0478985	0.113556	0.135196
598	G	0.318427	0.273539	0.316561	0.391423	0.172766	0.299162	0.517417	0.495765	0.337375	0.460653	0.406374	0.287908	0.455322	0.40678
600	G	0.0545033	0.0702741	0.0806712	0.0999167	0.150921	0.0573066	0.148134	0.134117	0.135629	0.124892	0.0747304	0.047824	0.0968992	0.0680581
601	G	0.0882742	0.0888231	0.0682012	0.0528914	0.107181	0.0377644	0.0582185	0.160359	0.0957345	0.0301326	0.0442429	0.0243132	0.0564972	0.0235266
602	G	0.142086	0.169515	0.196046	0.102564	0.146929	0.0732601	0.0764088	0.11534	0.0521431	0.0395922	0.065331	0.0359324	0.0683995	0.17327
606	G	0.143866	0.114855	0.0147885	0.0316006	0.0798191	0.0681431	0.00911411	0.0299611	0.0197414	0	0.0621247	0.0231107	0.0919721	0.0112892
610	G	0.183397	0.165759	0.278707	0.192993	0.196367	0.296042	0.542222	0.891982	1.09464	0.509071	0.637007	0.509453	0.316496	0.608879
611	G	0.256129	0.271258	0.19458	0.280526	0.241838	0.138611	0.396825	0.568749	0.666004	0.454847	0.496586	0.436631	0.24072	0.470536
613	G	0.662252	0.735383	0.651042	0.631199	0.811629	0.347496	0.491159	0.612089	0.566387	0.772986	0.470958	0.393895	0.560748	0.528338
617	G	0.168472	0.195156	0.387382	0.188761	0.170222	0.263852	0.183841	0.19202	0.177527	0.192933	0.186649	0.105572	0.259965	0.184523
620	G	0.385703	0.486381	0.481752	0.4	0.374269	0.519519	0.465342	0.365994	0.182741	0.314729	0.262295	0.291511	0.509937	0.28332
623	G	0.174629	0.279362	0.295739	0.326652	0.225879	0.258997	0.294761	0.346126	0.300271	0.259094	0.388451	0.254735	0.285137	0.307237
625	G	0.16127	0.343132	0.141316	0.26455	0.225548	0.209773	0.267478	0.243879	0.171202	0.21523	0.230369	0.134995	0.16768	0.225588
626	G	0.0936956	0.0489237	0.135722	0.175579	0.0960717	0.0644164	0.0285878	0.0200501	0.0642497	0.0535103	0.0205233	0.0423325	0.0545316	0.0442087
635	G	0.0878638	0.178607	0.120219	0.104918	0.0959777	0.121495	0.205706	0.252171	0.274961	0.233006	0.247219	0.157869	0.0958237	0.177824
644	G	0.0922935	0.13572	0.131	0.0434452	0.0442347	0.032113	0.124808	0.0603258	0.0652316	0.0330287	0.0505153	0.0416017	0.0487567	0.0341919
646	G	0.0635439	0.0835282	0.0737395	0.0856531	0.101457	0.0237079	0.0578313	0.161861	0.185546	0.14438	0.0610936	0.142763	0.0621032	0.0942063
656	G	0.0923532	0.143836	0.158464	0.0874986	0.072881	0.0554807	0.0502866	0.020762	0.0962835	0.0347423	0.0208464	0.0113404	0.09795	0.0121714
659	G	0.149393	0.273668	0.225543	0.197998	0.205565	0.0644174	0.315972	0.304814	0.389408	0.271162	0.31559	0.114482	0.144634	0.100604
662	G	0.158134	0.210392	0.0704864	0.162696	0.124378	0.101471	0.0516636	0.117084	0.127351	0.0608421	0.116476	0.0335008	0.114025	0.0499813
665	G	0.186625	0.0957579	0.0953087	0.13369	0.177291	0.034229	0.041632	0.0532198	0.0986096	0.024817	0.042346	0.0108849	0.0771188	0.0615536
673	G	0.106057	0.110412	0.142942	0.0413451	0.0912659	0.056338	0.113029	0.165992	0.156847	0.0865694	0.124636	0.0750912	0.106453	0.07249
677	G	0.121773	0.0693963	0.209437	0.0707814	0.131628	0.0298181	0.375346	0.255252	0.346897	0.215054	0.292398	0.107887	0.12095	0.185759
680	G	0.083662	0.13462	0.0474383	0.112123	0.109349	0.0384025	0.101854	0.0813091	0.105223	0.0735655	0.0984543	0.0530054	0.0574053	0.0487983
683	G	0.062027	0.0934579	0.050537	0.0438148	0.0479754	0	0.126064	0.147121	0.139096	0.138801	0.0817745	0.055605	0.0779896	0.101885
684	G	0.193598	0.122175	0.174426	0.10674	0.233242	0.122574	0.110448	0.0220677	0.0633379	0.119174	0.0430015	0.0231294	0.187634	0.0803859
690	G	0.156288	0.0797994	0.0864518	0.156852	0.0929454	0.040404	0.50885	0.325591	0.342686	0.549882	0.307986	0.103046	0.197203	0.312245
691	G	0.1553	0.173827	0.160944	0.183936	0.19984	0.0984131	0.271924	0.232971	0.220313	0.255171	0.251394	0.178232	0.199161	0.196878
692	G	1.46203	1.6687	2.22779	1.43829	1.89134	0.364033	0.0819576	0.137931	0.217416	0.125122	0.157764	0.0606796	0.538909	0.202371
694	G	0.518135	0.44155	0.404214	0.74501	0.208026	0.201763	0.454907	0.281278	0.280994	0.438363	0.227988	0.242915	0.278873	0.271186
696	G	0.224143	0.254531	0.279557	0.316536	0.204952	0.132356	0.279924	0.322581	0.438745	0.374001	0.299145	0.22792	0.213993	0.172345
697	G	0.342786	0.285799	0.248897	0.405007	0.280561	0.185892	0.310593	0.318122	0.32493	0.484015	0.21126	0.256325	0.295805	0.392054
698	G	0.34418	0.382653	0.258922	0.348779	0.335249	0.252525	0.412946	0.287039	0.259506	0.409994	0.296296	0.313409	0.321658	0.235849
700	G	0.0872093	0.100137	0.147012	0.129305	0.097539	0.0891186	0.307591	0.0865988	0.121722	0.138278	0.144958	0.186465	0.0814266	0.127243
701	G	0.184377	0.13645	0.21978	0.248051	0.277133	0.159447	0.0986409	0.0864771	0.121681	0.176545	0.134673	0.175227	0.161681	0.177936
702	G	0.273144	0.281434	0.219482	0.190182	0.172517	0.158103	0.0660211	0.0865614	0.121965	0.101433	0.103939	0.109854	0.120154	0.0765111
704	G	0.0775119	0.036137	0.0730232	0.0592557	0.0521999	0.0520924	0.0327011	0.0322303	0.0110485	0.0626723	0.0411057	0.0970769	0.0236183	0.0251225
705	G	0.115562	0.179131	0.25047	0.10612	0.186456	0.0861252	0.0443262	0.0218675	0.011236	0.0380469	0	0.0434263	0.131498	0.0378597
709	G	0.126628	0.126968	0.13911	0.0892758	0.186621	0.113979	0.0442282	0	0.0224593	0.012596	0.0207922	0.0107342	0.136445	0.0373925
712	G	0.0335317	0.10989	0.0653473	0.11296	0.129032	0.0904227	0.0109075	0.0106895	0.0222643	0.024432	0.0410256	0	0.0456383	0
714	G	0.0167224	0.0313603	0.0558919	0.0205065	0.0203542	0.0075171	0.0109051	0.0106815	0.0333444	0	0.0102617	0	0.0194818	0.0241167
716	G	0.0502344	0.0707436	0.0559963	0.0409878	0.0407526	0.0225904	0.0332521	0	0.011274	0.0246124	0.020829	0.0107956	0.0519211	0.0121877
717	G	0.0920425	0.0785114	0.186672	0.0920245	0.0950764	0.0903751	0.0332889	0.0325133	0.0225785	0.0245881	0.0626239	0.0540833	0.0388727	0.0487686
719	G	0.0334868	0.0471735	0.028082	0.0409668	0.0749166	0.0603956	0.0224165	0.010929	0.0114403	0.0369549	0.0211327	0.0110072	0.0388023	0.0122594
721	G	0.195379	0.223982	0.342498	0.27058	0.187007	0.138026	0	0.0226783	0	0	0.0110011	0.0118469	0.190652	0.0387447
727	G	0.11133	0.1213	0.0772947	0.0734677	0.119845	0.0626076	0.0254745	0.0377311	0	0.040689	0.0486559	0.0133833	0.0598325	0
731	G	0.0691025	0.0980392	0.0684597	0.052843	0.0784985	0.0634115	0.0138715	0.0274048	0.0431282	0	0.039672	0	0.0534509	0
737	G	0.133547	0.0674992	0.101163	0.0865988	0.148677	0.112994	0.032911	0.0831532	0.140944	0.0319949	0.0321234	0.0795798	0.074435	0
744	G	0.114646	0.16622	0.135272	0.174014	0.124141	0.0899361	0.0735024	0.128064	0.0409082	0.0173732	0.0908265	0.0731261	0.120545	0.0544465
751	G	0.283316	0.265117	0.231273	0.27972	0.415369	0.30429	0.242229	0.416233	0.246914	0.167007	0.389824	0.359865	0.299248	0.316331
752	G	0.618628	0.492005	0.536723	0.484765	0.476493	0.480286	0.439464	0.358262	0.656615	0.222402	0.428797	0.278358	0.566336	0.27927
754	G	0.733895	0.635909	0.711744	0.645802	0.598563	0.484027	0.325244	0.349301	0.436443	0.206612	0.418082	0.323015	0.477406	0.274383
762	G	0.158019	0.107296	0.129408	0.162338	0.185874	0.107354	0.0709891	0.138985	0.0981354	0.114679	0.118934	0.125471	0.218182	0.0829646
765	G	0.0846979	0.116857	0.0690846	0.0345185	0.170068	0.0547495	0.070738	0.0924428	0.0486381	0.0452489	0.0237023	0.0650407	0.0746269	0.0564972
772	G	0.0229832	0.155314	0.119303	0.0582072	0	0.0394477	0.0201816	0	0	0.0405762	0.062448	0	0.136861	0.0259673
775	G	0.0569801	0.0897344	0.0190512	0.0735655	0.0466708	0.0487726	0.0189934	0.0191681	0.0203087	0	0	0	0.0129349	0
777	G	0.0507872	0.111146	0.102145	0.109337	0.0819224	0.0714898	0	0	0.0195963	0.018875	0	0	0.0351329	0
779	G	0.149076	0.12285	0.101068	0.133308	0.170435	0.0959348	0.031109	0	0.0165125	0.0495213	0	0	0.126484	0
784	G	0.0907323	0.178444	0.111221	0.082631	0.126435	0.0819924	0.0544959	0.0278513	0.044287	0.0441566	0.0545926	0.0308499	0.0763035	0.0492611
786	G	0.0618812	0.0910125	0.0958773	0.0785176	0.0467727	0.0388463	0.0126968	0.0260349	0.02759	0.0136893	0.0253357	0.0142066	0.0160823	0.0149993
787	G	0.122805	0.112956	0.0830861	0.0622278	0.0923446	0.133257	0.0125282	0.0128535	0.0408552	0.0406449	0.0374906	0	0.0789141	0.0438468
788	G	0.0736558	0.0564717	0.0947643	0.0934434	0.101439	0.0284981	0.0125834	0.038615	0.0546224	0.0136351	0	0.0137646	0.0315756	0.0147189
789	G	0.157404	0.156337	0.175788	0.153775	0.145985	0.0938086	0.0370782	0.0632831	0.0669613	0.0134318	0	0.0404694	0.0623199	0.0289855
793	G	0.033542	0.0310559	0.0333074	0.0569071	0.0345543	0.00898796	0.0115075	0.0469153	0.0746269	0	0.0115487	0.0254065	0.0222701	0
796	G	0.178205	0.0986518	0.10473	0.067393	0.0338845	0.0439207	0.0206164	0	0.0225785	0.0228154	0.0104286	0	0.191264	0
798	G	0.00859107	0.0319565	0	0	0.0332447	0.00711997	0.0302511	0.0102796	0.0111334	0.0111532	0	0.0111247	0.0299025	0
807	G	0.0998771	0.12973	0.101857	0.183859	0.110193	0.0977708	1.31979	1.48293	1.63447	1.44669	1.40762	2.53935	0.136329	2.2403
817	G	0.088659	0.125497	0.0912686	0.0934842	0.10104	0.0382117	0.047019	0.0771828	0.127416	0.0724488	0.0684597	0	0.0750268	0.0216544
819	G	0.119136	0.126271	0.107124	0.122238	0.114059	0.127787	0.0397338	0.0408914	0.0452694	0.0217132	0.0520454	0.0423864	0.113183	0.022097
821	G	0.0817661	0.0839454	0.0538876	0.103461	0.0724988	0.100927	0.0401405	0.0728181	0.0231027	0.0327618	0.0749866	0.0208203	0.0533931	0.0321165
828	G	0.661144	0.520908	0.568451	0.403032	0.53932	0.582954	0.353357	0.228484	0.442796	0.194486	0.27024	0.343348	0.498132	0.239651
831	G	0.438775	0.461894	0.59676	0.45417	0.419302	0.473793	0.306619	0.295923	0.216294	0.173551	0.250769	0.397263	0.604173	0.346756
832	G	0.612638	0.62793	0.765354	0.521353	0.605698	0.583533	0.247232	0.179051	0.315266	0.211541	0.266019	0.293852	0.551508	0.31927
836	G	0.243355	0.281001	0.204082	0.235073	0.224269	0.259538	0.182973	0.257098	0.214541	0.210576	0.288384	0.560128	0.28668	0.421125
838	G	0.522322	0.595925	0.638874	0.471523	0.654495	0.726731	0.228733	0.282486	0.360187	0.201517	0.305415	0.491573	0.68793	0.37257
841	G	0.178478	0.155457	0.289436	0.225764	0.233804	0.189653	0.229885	0.289235	0.331345	0.117233	0.366898	0.403843	0.388052	0.266205
845	G	0.0559284	0.121668	0.0784621	0.114074	0.0742863	0.0114495	0.0376459	0.01295	0.0671411	0.0269324	0.0565291	0	0.0494364	0.042005
846	G	0.124	0.0671667	0.105778	0.144279	0.085883	0.0352651	0.026001	0.0403877	0	0.041806	0	0.0467071	0.0913335	0.0145307
852	G	0.333407	0.47336	0.57648	0.587898	0.421008	0.266081	0.462558	0.709034	0.615848	0.474512	0.536232	0.398712	0.29613	0.25718
855	G	0.420118	0.287253	0.452873	0.362662	0.353732	0.525417	0.403932	0.409952	0.234158	0.305677	0.436613	0.446724	0.424069	0.257108
859	G	0.253606	0.253405	0.211335	0.251783	0.147493	0.19356	0	0.0455719	0.0616238	0.0468677	0	0.130281	0.235886	0.0501924
860	G	0.176452	0.11245	0.0971817	0.106406	0.100418	0.0357526	0.116482	0.215021	0.155159	0.204403	0.137646	0.341751	0.0807494	0.443157
867	G	0.116976	0.0292569	0.0866701	0.040024	0.0793903	0.0706215	0.134553	0.169587	0.175464	0.146391	0.222258	0.0872753	0.0297841	0.0781983
868	G	0.0729607	0.116448	0.0693722	0.0803536	0.0966028	0	0.189471	0.213008	0.117647	0.133018	0.192031	0.158507	0.0303859	0.254615
873	G	5.08287	4.87607	4.63501	3.48771	5.45964	6.10832	4.42595	4.426	3.63662	2.74292	5.11408	4.44894	4.93416	4.53378
874	G	0.0534188	0.103788	0.170252	0.0734214	0.150489	0.084076	0.0781352	0.123035	0.111343	0.114548	0.108158	0.0984091	0.0844238	0.191882
878	G	0.142518	0.214762	0.239266	0.212766	0.242588	0.120609	0.0825472	0.11243	0.0978354	0.0652231	0.137306	0.0375987	0.110933	0.108565
880	G	0.0714201	0.13607	0.0532978	0.0823859	0.0269869	0.0755858	0.0937427	0.160951	0.0846024	0.130276	0.135814	0.0997755	0.0495172	0.16835
881	G	0.157748	0.0926355	0.135208	0.168237	0.123508	0.202713	0.024001	0.0382312	0.0737101	0.0534474	0.0415628	0.0254259	0.0757289	0.0617665
891	G	0.0838725	0.0574449	0.0668092	0.0492207	0.0663218	0.0893788	0.0117772	0.0746269	0.0361925	0	0.0134481	0	0.0849927	0.0116333
894	G	0.0560538	0.107469	0.038373	0.061134	0.0855327	0.0411749	0.034646	0.0606061	0.0480192	0.0126231	0.053142	0.0116131	0.0460458	0.0569022
895	G	0.179674	0.182914	0.128485	0.091954	0.110362	0.12474	0.0115875	0.0121315	0	0	0.0398353	0	0.0462267	0.0227609
901	G	0.0926248	0.055991	0.0532623	0.0793399	0.10242	0.0582581	0	0.0583703	0.0231642	0.0848279	0.0381631	0.0456882	0.0359755	0.0222395
902	G	0.106057	0.102646	0.0678518	0.0484731	0.105001	0.119868	0.0458453	0.023912	0.0475172	0.0248201	0.0130141	0.0232612	0.110701	0.011334
907	G	0.172054	0.250388	0.22792	0.185185	0.251046	0.144138	0.332531	0.308935	0.131328	0.150659	0.246978	0.172553	0.129517	0.1461
909	G	0.0622587	0.180658	0.11559	0.102249	0.169899	0.130421	0.149683	0.107232	0.10803	0.0756716	0.143117	0.185164	0.104698	0.124477
910	G	0.158144	0.16439	0.24305	0.196358	0.314607	0.246566	0.0705633	0.132802	0.169246	0.11649	0.120176	0.17887	0.168895	0.117564
915	G	0.0969798	0.0532198	0.0484653	0.0188608	0.0486618	0.0189897	0.0321992	0.0438596	0.0107066	0.0239149	0.0605987	0.022237	0.044405	0.0546448
921	G	0.320781	0.445825	0.398473	0.361974	0.366728	0.427932	0.438185	0.314663	0.319588	0.34823	0.30581	0.250417	0.365965	0.245248
923	G	0.77266	0.74552	1.17292	1.03385	0.838088	0.483304	0.394969	0.35413	0.346021	0.559701	0.468713	0.388166	0.811396	0.231214
924	G	0.52682	0.505825	0.286588	0.284215	0.268559	0.381337	0.365612	0.24974	0.273279	0.281492	0.353982	0.409277	0.244683	0.177973
925	G	0.492368	0.628338	0.780945	0.561545	0.490388	0.522965	0.324641	0.261233	0.464178	0.38687	0.402081	0.209996	0.553013	0.262302
928	G	0.43684	0.516707	0.445576	0.381406	0.486979	0.460193	0.22001	0.229	0.420336	0.361137	0.282287	0.207706	0.469392	0.270523
929	G	0.846694	0.817717	0.862069	0.651769	0.666667	0.432408	0.364631	0.332192	0.270584	0.305637	0.318653	0.367384	1.02515	0.346797
932	G	0.390747	0.421053	0.357334	0.3003	0.378378	0.442053	0.509867	0.49505	0.467125	0.499896	0.634096	0.613034	0.407365	0.856148
933	G	0.461378	0.455063	0.449476	0.394663	0.489782	0.391937	0.37795	0.484239	0.522081	0.435135	0.555275	0.576691	0.581761	0.714485
934	G	0.0740302	0.155345	0.215054	0.111586	0.181788	0.159546	0.191048	0.260791	0.160135	0.0803455	0.179408	0.217529	0.145688	0.315628
935	G	0.174023	0.212379	0.157729	0.21628	0.0695048	0.0747384	0.0749695	0.101805	0.128999	0.155974	0.112451	0.121883	0.106772	0.102833
936	G	0.261224	0.475964	0.239985	0.407249	0.307192	0.210004	0.0574383	0.0565185	0.0969078	0.0849618	0.0836645	0.0489716	0.21978	0.0385654
942	G	0.0637247	0.0465261	0.0179276	0.0588928	0.0177999	0.0560643	0	0.00954563	0	0.0213561	0.0107055	0	0.107132	0.0101719
947	G	0.559614	0.554889	0.447658	0.492704	0.570441	0.440286	0.369866	0.378967	0.291758	0.468833	0.330526	0.194049	0.367377	0.14427
949	G	0.942467	0.814332	0.704657	0.820793	1.35991	0.912093	0.550065	0.461163	0.648845	0.809758	0.730297	0.4954	0.964712	0.397634
952	G	0.499266	0.407189	0.344234	0.303409	0.559211	0.21609	0.235516	0.191974	0.128932	0.239284	0.224972	0.123457	0.247106	0.0978569
956	G	0.0823723	0.140318	0.0500167	0.0793179	0.0938791	0.0374322	0.0390511	0.0187882	0.0528309	0	0	0.0212721	0.0411579	0.0100725
958	G	0.130336	0.200154	0.0988957	0.156586	0.111566	0	0.096367	0.0931706	0.0873515	0.0752041	0.0522357	0.0531802	0.150788	0.0404285
959	G	0.0613779	0.043535	0.0927357	0.092285	0.0527148	0.0360166	0.018134	0.0350846	0.0328974	0.0100969	0.0197844	0.0103659	0.0508259	0
961	G	0.448766	0.748271	0.630347	0.522523	0.66758	0.571033	0.642628	0.799861	0.753891	0.783419	0.613437	0.700935	0.547033	0.564701
970	G	0.0605547	0.114692	0.0486381	0.0590058	0.0701164	0.0933956	0	0.00792142	0.0221272	0.0177651	0.0177069	0	0.018111	0.0165344
971	G	0.0845104	0.1373	0.132738	0.117371	0.111157	0.0399467	0.00843882	0	0.0153941	0.0277778	0.0276345	0	0.0725953	0.0172384
975	G	0.0745792	0.0707428	0.12959	0.103292	0.111372	0.0617055	0.0492247	0.00799808	0.0441956	0.0180083	0.0178142	0.00894614	0.102837	0.00846883
976	G	0.191225	0.141072	0.2796	0.192901	0.357848	0.234452	0.0247056	0.0160333	0.0518442	0.00903996	0.00895015	0.0636943	0.205638	0.0085778
978	G	0.0306623	0.154232	0.0829187	0.0980272	0.129641	0.0356252	0.0160914	0.0550791	0.0577576	0.0176429	0.0438443	0.0361337	0.0331785	0
982	G	0.0490581	0.018622	0.0701333	0.0353815	0.0899483	0.0225175	0.00798658	0.0158165	0	0	0.00877578	0.0181752	0.0158617	0.0170082
985	G	0.0778008	0.0908866	0.0458589	0.0634115	0.0702459	0.0516422	0.0808289	0.0958773	0.0475188	0.0163961	0.0412473	0.0427679	0.126498	0.0319846
986	G	0.120919	0.0909467	0.165122	0.158881	0.0903524	0.103381	0.11789	0.16998	0.0950377	0.0986842	0.140635	0.094283	0.133988	0.0641231
991	G	0.0749344	0.116885	0.121004	0.102916	0.0765781	0.0562177	0.0709276	0.0316706	0.0586682	0.0441852	0.0448833	0.0564175	0.134419	0.0865276
993	G	0.101776	0.0893336	0.0910747	0.113533	0.163452	0.0557662	0.161514	0.155436	0.208408	0.163132	0.150736	0.127901	0.0547003	0.100025
995	G	0.0181984	0.0533665	0.0406091	0.0449236	0.0327547	0.0340059	0.0820528	0.128583	0.20202	0.182467	0.155467	0.136042	0.0399521	0.123102
999	G	0.144875	0.149687	0.121433	0.144702	0.217179	0.0774251	0.0844951	0.0927975	0.0991473	0.0233082	0.105622	0.0249397	0.18156	0.0677711
1005	G	0.131165	0.205006	0.206958	0.0867303	0.137479	0.108307	0.0855151	0.125794	0.0979552	0.036531	0.0523286	0.0539665	0.0699518	0.0779534
1010	G	0.121665	0.085859	0.060054	0.0762777	0.0964114	0.0340677	0.0580833	0.0586548	0.0963507	0.0720981	0.0294963	0.0689814	0.0564198	0.090871
1014	G	0.0703049	0.078637	0.0512505	0.0332189	0.0868715	0	0.0131216	0.00663394	0.0248124	0.0147667	0	0.00767401	0.0409635	0.00710985
1029	G	0.0658638	0.0940115	0.177305	0.0592979	0.125513	0.14771	0.124737	0.186953	0.253518	0.161492	0.21507	0.236914	0.0372752	0.174313
1033	G	0.0648328	0.0555761	0.0989664	0.0943953	0.113327	0.0726392	0.138212	0.150726	0.210346	0.120219	0.115509	0.0614251	0.0823874	0.0709622
1037	G	0.151165	0.123883	0.188877	0.124886	0.143109	0.152815	0.0715633	0.0819728	0.125945	0.0894321	0.0688021	0.038072	0.0702062	0.0282526
1040	G	0.195263	0.277871	0.148104	0.141828	0.168226	0.23569	0.252032	0.291294	0.298024	0.354405	0.295946	0.363293	0.24853	0.435167
1041	G	0.222927	0.18652	0.208685	0.187163	0.382125	0.251314	0.317098	0.319829	0.365464	0.414847	0.439675	0.445972	0.244705	0.453858
1043	G	0.437494	0.399673	0.361164	0.382318	0.254394	0.0871514	0.165049	0.131725	0.224048	0.206454	0.146684	0.20498	0.470546	0.143658
1044	G	0.237197	0.218477	0.164648	0.166852	0.185824	0.0834144	0.0214255	0.0298864	0.036295	0.057509	0.066072	0.040404	0.120846	0.0538752
1048	G	0.0417537	0.0398525	0.0564844	0.0796813	0.0379891	0.0533262	0.0211253	0.0219555	0.0499714	0.0805672	0.0403616	0.0554412	0.0391198	0.0301137
1051	G	0.0931484	0.0595179	0.0675068	0.11919	0.0881279	0.0392979	0.0502621	0.0372218	0.0364884	0.0328596	0.0410004	0.0316882	0.0288795	0.0227169
1054	G	0.0310398	0.0696033	0.0341064	0.0529521	0.0374438	0.0386598	0.036169	0.0377415	0.0525131	0.0250794	0.00830841	0.0555511	0.0577868	0.0384113
1059	G	0.0625913	0.131446	0.0584932	0.0798085	0.0625626	0.039032	0.0528581	0.103577	0.0942285	0.0798509	0.0795053	0.0787402	0.0289771	0.110366
1065	G	0.0883219	0.105022	0.100716	0.12427	0.0953402	0.165458	0.122568	0.10534	0.165969	0.0726414	0.148354	0.137024	0.103064	0.11473
1068	G	0.0579374	0.0937822	0.0443705	0.0608865	0.178147	0.113208	0.101586	0.0664231	0.138223	0.082584	0.0758653	0.0837209	0.120359	0.0717424
1071	G	0.100191	0.0621559	0.073406	0.0805709	0.0899281	0.0357398	0.0542005	0.0245078	0.0396228	0.00909091	0	0.0183824	0.0791487	0.0176258
1076	G	0.12471	0.0780979	0.030804	0.0447577	0.0329453	0.0469759	0.209579	0.30303	0.238001	0.333845	0.309336	0.300526	0.0692281	0.269397
1086	G	0.0815291	0.106223	0.07431	0.113366	0.121628	0.060241	0.0665004	0.184973	0.119454	0.0983284	0.0514297	0.0509632	0.0925754	0.0682261
1089	G	1.36406	1.39437	1.56906	1.32075	1.33687	1.20316	0.575199	0.586378	0.600522	0.576483	0.685076	0.527677	1.40365	0.390282
1092	G	0.167142	0.258447	0.300196	0.135735	0.204819	0.276461	0.395968	0.373241	0.37327	0.362807	0.321116	0.331675	0.289286	0.172993
1096	G	0.0713267	0.103436	0.0851185	0.146456	0.15417	0.121988	0.282184	0.175729	0.368789	0.177837	0.320665	0.257883	0.180963	0.286685
1097	G	0.242925	0.317274	0.463768	0.254491	0.272362	0.295306	0.270162	0.456476	0.437506	0.353558	0.367512	0.325458	0.308375	0.346208
1099	G	0.356234	0.270536	0.411084	0.235701	0.313667	0.293734	0.443071	0.533537	0.385083	0.363551	0.391217	0.31176	0.414938	0.299833
1102	G	0.112296	0.164136	0.189819	0.13767	0.113599	0.108303	0.0993158	0.140105	0.107677	0.075358	0.080819	0.107339	0.101508	0.0596516
1104	G	0.260703	0.0937961	0.167448	0.134116	0.141777	0.141769	0.175901	0.163284	0.225782	0.0625861	0.107066	0.228618	0.156717	0.190862
1105	G	0.395634	0.319064	0.397088	0.415282	0.5145	0.247919	0.228236	0.334873	0.361049	0.111552	0.198939	0.17438	0.383305	0.285612
1107	G	0.135135	0.0263922	0.0647564	0.183762	0.0614723	0.0345125	0.224575	0.14869	0.281749	0.15875	0.117878	0.103573	0.0949668	0.150446
1108	G	0.259669	0.280749	0.21221	0.202668	0.248679	0.121549	0.108696	0.0695894	0.0848896	0.0866873	0.0397562	0.0780437	0.109022	0.0819576
1110	G	0.0275482	0.0945818	0.0656814	0.0683995	0.0314861	0	0.0440141	0.0234137	0.0322858	0.06182	0.0267094	0.0799041	0.0406009	0.0594177
1121	G	0.242892	0.254669	0.179563	0.202094	0.237047	0.208587	0.242409	0.273748	0.208469	0.201294	0.293165	0.176497	0.252358	0.0929985
1126	G	0.412493	0.523484	0.537197	0.561587	0.299351	0.410576	0.407861	0.389157	0.479798	0.255682	0.224854	0.302855	0.434611	0.192579
1129	G	0.138334	0.151976	0.184688	0.176852	0.102459	0.0672834	0.312283	0.22596	0.281955	0.269215	0.294118	0.291738	0.2977	0.108774
1130	G	0.206415	0.18712	0.258398	0.101031	0.314027	0.188582	0.234532	0.169041	0.226783	0.0912409	0.175462	0.140737	0.152502	0.176616
1131	G	0.08285	0.146175	0.231111	0.335359	0.270076	0.159886	0.0567924	0.0369276	0.0695088	0.0797978	0.0687569	0.0390066	0.100287	0.011999
1134	G	0.137907	0.117865	0.240696	0.0873935	0.223672	0.109509	0.0232693	0.0253807	0.0119005	0.0136799	0.0141583	0.0265287	0.0738552	0.0366435
1140	G	0.119119	0.0436237	0.0800769	0.0767312	0.0817929	0.1059	0.0904886	0.186118	0.11528	0.117716	0.135769	0.155366	0.0603573	0.172641
1141	G	0.0889416	0.188378	0.159591	0.134305	0.179416	0.165763	0.100604	0.131464	0.198206	0.0823917	0.0990835	0.0780118	0.120207	0.152765
1142	G	0.440667	0.443561	0.606673	0.468718	0.362444	0.175187	0.271512	0.181756	0.312668	0.243902	0.346065	0.243112	0.100819	0.305746
1151	G	0.0604011	0.117966	0.0671592	0.109873	0.081555	0.0541859	0.00935366	0.0408288	0.0199621	0.0329453	0.034823	0.0213972	0.0733445	0.00987264
1157	G	0.0604595	0.029432	0.126263	0.0395674	0.0819384	0.0949555	0.0177573	0	0.00972384	0	0	0.0102302	0	0
1158	G	0.120749	0.107527	0.0917536	0.118359	0.0936001	0.0949442	0.00897666	0.0195886	0	0.0104319	0.0112183	0.0207168	0.0186254	0.00967118
1159	G	0.130287	0.204658	0.114338	0.117971	0.128265	0.0592417	0	0	0.019755	0.0208616	0	0.0103563	0.11141	0.00966464
1164	G	0.107896	0.1624	0.168881	0.128041	0.0693802	0.057924	0.069979	0.114297	0.0289491	0.0713121	0.0439367	0.0605694	0.0825234	0.0470898
1165	G	0.106414	0.14175	0.200378	0.189036	0.103081	0.125328	0.0521603	0.113282	0.0764088	0.0202737	0.0652813	0.0197414	0.126662	0.0278655
1166	G	0.194534	0.171625	0.0559347	0.163893	0.104118	0.103401	0.0530176	0.0671334	0.0683928	0.0412541	0.0777087	0.0506791	0.120281	0.0284981
1167	G	0.0485578	0.142531	0.0889779	0.112909	0.139034	0.0805616	0.0621394	0.0581677	0.108535	0.0414422	0.044843	0.0922226	0.0833488	0.0573175
1168	G	0.125168	0.178689	0.120786	0.124254	0.114574	0.20595	0.0443066	0.0386847	0.0492708	0.041365	0.0671592	0.0102817	0.138427	0.0380989
1169	G	0.591372	0.605659	0.629765	0.44899	0.471264	0.161719	0.00890393	0.0194609	0.0395413	0.0208464	0	0	0.102765	0.00957671
1171	G	0.106755	0.170084	0.110059	0.162277	0.0914077	0.10401	0.0344738	0.0752375	0.0758581	0.0203604	0.0436967	0.0610128	0.112899	0.0748503
1175	G	0.21911	0.157276	0.119397	0.0855118	0.169799	0.0934689	0.171984	0.188697	0.190458	0.150587	0.143282	0.115111	0.134177	0.133639
1176	G	0.217145	0.210932	0.140086	0.278822	0.258747	0.174176	0.118143	0.147792	0.204689	0.137755	0.15163	0.10353	0.133473	0.198525
1179	G	0.095057	0.139639	0.121574	0.134903	0.137852	0.130703	0.10582	0.0712758	0.0714796	0.0945448	0.0841751	0.0715673	0.0994629	0.0185908
1184	G	0.112233	0.156841	0.0783962	0.134294	0.068918	0.0711575	0.146592	0.124389	0.198323	0.112433	0.0628141	0.0723066	0.0395491	0.0747384
1187	G	0.0365263	0.135038	0.121159	0.0958543	0.0895957	0.0824985	0.360115	0.438135	0.54486	0.319052	0.301675	0.36393	0.087745	0.327958
1197	G	0.130415	0.127982	0.158479	0.183643	0.0682439	0.048727	0.107076	0.0878906	0.113695	0.0909275	0.0582072	0.0361228	0.211204	0.042526
1198	G	0.0833102	0.135624	0.0558909	0.0729749	0.111669	0.0831354	0.0368155	0.0605266	0.107701	0.0517706	0.0362582	0.0616599	0.0881144	0.087652
1203	G	0.177989	0.223301	0.250268	0.182339	0.238436	0.118906	0.404817	0.367483	0.616041	0.410444	0.253097	0.363738	0.119983	0.224803
1206	G	0.308642	0.272777	0.222519	0.394283	0.356705	0.285112	0.171461	0.199895	0.189436	0.181044	0.232587	0.330164	0.39501	0.175953
1207	G	0.281089	0.274258	0.287886	0.308048	0.274443	0.221293	0.305178	0.141105	0.217765	0.196507	0.138942	0.187718	0.258451	0.153974
1210	G	0.408243	0.314196	0.356363	0.451089	0.371663	0.33993	0.236188	0.237288	0.214311	0.180485	0.260892	0.335383	0.305553	0.30596
1211	G	0.403268	0.271248	0.395304	0.424658	0.343683	0.228079	0.288123	0.328022	0.183307	0.304664	0.368098	0.21933	0.300067	0.204238
1212	G	0.430108	0.438422	0.317498	0.505257	0.395257	0.331004	0.171729	0.082801	0.196078	0.223977	0.30253	0.250294	0.261011	0.179211
1221	G	0.0997838	0.102686	0.0927644	0.112057	0.137451	0.0670691	0.0316957	0.0117178	0.024432	0.0465279	0	0.0424929	0.0448672	0.0375281
1222	G	0.0577367	0.125599	0.0460829	0.111383	0.0727008	0.028585	0.0105977	0.0588374	0.024567	0.0116768	0.026842	0.042517	0.0267023	0.0125644
1224	G	0.0793777	0.0675321	0.0891981	0.064041	0.0963054	0.0373832	0	0.0116442	0	0.0230203	0.0398777	0.0279369	0.0609066	0.0370005
1226	G	0.0236742	0.0523052	0.0892777	0.0318336	0.0607639	0.0280584	0	0	0.0254259	0.023411	0	0.028885	0.0695169	0.0253004
1227	G	0.0628437	0.133978	0.151826	0.116439	0.129859	0.0559806	0	0.0477498	0.0127486	0.0352195	0.0271628	0	0.0866626	0.0126566
1229	G	0.126044	0.17948	0.224901	0.13796	0.13056	0.0841279	0.0324781	0.035898	0.0384615	0.0470699	0.0272368	0.0143	0.086949	0.0126727
1233	G	0.0852119	0.0954128	0.133416	0.0936817	0.15327	0.064534	0.123111	0.174585	0.35558	0.0962348	0.0704821	0.0434594	0.0771142	0.117279
[truncated: 187 more rows]

## Sheet: G>C
18s location	forward strand reference base	WT NaBH4 2-NH2-d-ATP HIV	75% WT NaBH4 2-NH2-d-ATP HIV	50% WT NaBH4 2-NH2-d-ATP HIV	25% WT NaBH4 2-NH2-d-ATP HIV	WT untreated 2-NH2-d-ATP HIV	WT untreated dNTPs HIV	WT NaBH4 d2-NH2-d-ATP SSIV	75% WT NaBH4 dNH2-ATP SSIV	50% WT NaBH4 2-NH2-d-ATP SSIV	25% WT NaBH4 2-NH2-d-ATP SSIV	WT untreated 2-NH2-d-ATP SSIV	WT untreated dNTPs SSIV	WT NaBH4 dNTPs HIV	WT NaBH4 dNTPs SSIV
[truncated: 549 more rows]

[truncated: 4 more sheets: G>T, T>A, T>C, T>G]
