# Supplementary material
Source: HighWire-hosted journal article supplement (doi:10.1101/rna.079863.123)
Supplement: Supplemental_Table5.xlsx [file Supplemental_Table5.xlsx]

## Sheet: Nucleotide numbering
Assigned position	Residue number (Taoka, 2018)
1	1
2	2
3	3
4	4
5	5
6	6
7	7
8	8
9	9
10	10
11	11
12	12
13	13
14	14
15	15
16	16
17	17
18	18
19	19
20	20
21	21
22	22
23	23
24	24
25	25
26	26
27	27
28	28
29	29
30	30
31	31
32	32
33	33
34	34
35	35
36	36
37	37
38	38
39	39
40	40
41	41
42	42
43	43
44	44
45	45
46	46
47	47
48	48
49	49
50	50
51	51
52	52
53	53
54	54
55	55
56	56
57	57
58	58
59	59
60	60
61	61
62	62
63	63
64	64
65	65
66	66
67	67
68	68
69	69
70	70
71	71
72	72
73	73
74	74
75	75
76	76
77	77
78	78
79	79
80	80
81	81
82	82
83	83
84	84
85	85
86	86
87	87
88	88
89	89
90	90
91	91
92	92
93	93
94	94
95	95
96	96
97	97
98	98
99	99
100	100
101	101
102	102
103	103
104	104
105	105
106	106
107	107
108	108
109	109
110	110
111	111
112	112
113	113
114	114
115	115
116	116
117	117
118	118
119	119
120	120
121	121
122	122
123	123
124	124
125	125
126	126
127	127
128	128
129	129
130	130
131	131
132	132
133	133
134	133a
135	133b
136	133c
137	134
138	135
139	136
140	137
141	138
142	139
143	140
144	141
145	142
146	143
147	144
148	145
149	146
150	147
151	148
152	149
153	150
154	151
155	152
156	153
157	154
158	155
159	156
160	157
161	158
162	159
163	160
164	161
165	162
166	163
167	164
168	165
169	166
170	167
171	168
172	169
173	170
174	171
175	172
176	173
177	174
178	175
179	176
180	177
181	178
182	179
183	180
184	181
185	182
186	183
187	184
188	185
189	186
190	187
191	188
192	189
193	190
194	191
195	192
196	193
197	194
198	195
199	196
200	197
201	198
202	199
203	200
204	201
205	202
206	203
207	204
208	205
209	206
210	207
211	208
212	209
213	210
214	211
215	212
216	213
217	214
218	215
219	216
220	217
221	218
222	219
223	220
224	221
225	222
226	223
227	224
228	225
229	226
230	227
231	228
232	229
233	230
234	231
235	232
236	233
237	234
238	235
239	236
240	237
241	238
242	239
243	240
244	241
245	242
246	243
247	244
248	245
249	246
250	247
251	248
252	249
253	249a
254	249b
255	249c
256	249d
257	249e
258	249f
259	250
260	251
261	252
262	253
263	254
264	255
265	256
266	257
267	258
268	259
269	260
270	261
271	262
272	263
273	264
274	265
275	266
276	267
277	268
278	269
279	270
280	271
281	272
282	273
283	274
284	275
285	276
286	277
287	278
288	279
289	280
290	281
291	282
292	283
293	284
294	285
295	286
296	287
297	288
298	289
299	290
300	291
301	292
302	293
303	294
304	295
305	296
306	297
307	298
308	299
309	300
310	301
311	302
312	303
313	304
314	305
315	306
316	307
317	308
318	309
319	310
320	311
321	312
322	313
323	314
324	315
325	316
326	317
327	318
328	319
329	320
330	321
331	322
332	323
333	324
334	325
335	326
336	327
337	328
338	329
339	330
340	331
341	332
342	333
343	334
344	335
345	336
346	337
347	338
348	339
349	340
350	341
351	342
352	343
353	344
354	345
355	346
356	347
357	348
358	349
359	350
360	351
361	352
362	353
363	354
364	355
365	356
366	357
367	358
368	359
369	360
370	361
371	362
372	363
373	364
374	365
375	366
376	367
377	368
378	369
379	370
380	371
381	372
382	373
383	374
384	375
385	376
386	377
387	378
388	379
389	380
390	381
391	382
392	383
393	384
394	385
395	386
396	387
397	388
398	389
399	390
400	391
401	392
402	393
403	394
404	395
405	396
406	397
407	398
408	399
409	400
410	401
411	402
412	403
413	404
414	405
415	406
416	407
417	408
418	409
419	410
420	411
421	412
422	413
423	414
424	415
425	416
426	417
427	418
428	419
429	420
430	421
431	422
432	423
433	424
434	425
435	426
436	427
437	428
438	429
439	430
440	431
441	432
442	433
443	434
444	435
445	436
446	437
447	438
448	439
449	440
450	441
451	442
452	443
453	444
454	445
455	446
456	447
457	448
458	449
459	450
460	451
461	452
462	453
463	454
464	455
465	456
466	457
467	458
468	459
469	460
470	461
471	462
472	463
473	464
474	465
475	466
476	467
477	468
478	469
479	470
480	471
481	472
482	473
483	474
484	475
485	476
486	477
487	478
488	479
489	480
490	481
491	482
492	483
493	484
494	485
495	486
496	487
497	488
498	489
499	490
500	491
501	492
502	493
503	494
504	495
505	496
506	497
507	498
508	499
509	500
510	501
511	502
512	503
513	504
514	505
515	506
516	507
517	508
518	509
519	510
520	511
521	512
522	513
523	514
524	515
525	516
526	517
527	518
528	519
529	520
530	521
531	522
532	523
533	524
534	525
535	526
536	527
537	528
538	529
539	530
540	531
541	532
542	533
543	534
544	535
545	536
546	537
547	538
548	539
549	540
550	541
551	542
552	543
553	544
554	545
555	546
556	547
557	548
558	549
559	550
560	551
561	552
562	553
563	554
564	555
565	556
566	557
567	558
568	559
569	560
570	561
571	562
572	563
573	564
574	565
575	566
576	567
577	568
578	569
579	570
580	571
581	572
582	573
583	574
584	575
585	576
586	577
587	578
588	579
589	580
590	581
591	582
592	583
593	584
594	585
595	586
596	587
597	588
598	589
599	590
600	591
601	592
602	593
603	594
604	595
605	596
606	597
607	598
608	599
609	600
610	601
611	602
612	603
613	604
614	605
615	606
616	607
617	608
618	609
619	610
620	611
621	612
622	613
623	614
624	615
625	616
626	617
627	618
628	619
629	620
630	621
631	622
632	623
633	624
634	625
635	626
636	627
637	628
638	629
639	630
640	631
641	632
642	633
643	634
644	635
645	636
646	637
647	638
648	639
649	640
650	641
651	642
652	643
653	644
654	645
655	646
656	647
657	648
658	649
659	650
660	651
661	652
662	653
663	654
664	655
665	656
666	657
667	658
668	659
669	660
670	661
671	662
672	663
673	664
674	665
675	666
676	667
677	668
678	669
679	670
680	671
681	672
682	673
683	674
684	675
685	676
686	677
687	678
688	679
689	680
690	681
691	682
692	683
693	684
694	685
695	686
696	687
697	688
698	689
699	690
700	691
701	692
702	693
703	694
704	695
705	696
706	697
707	698
708	699
709	700
710	701
711	702
712	703
713	704
714	705
715	706
716	707
717	708
718	709
719	710
720	711
721	712
722	713
723	714
724	715
725	716
726	717
727	718
728	719
729	720
730	721
731	722
732	723
733	724
734	725
735	726
736	727
737	728
738	729
739	730
740	731
741	732
742	733
743	734
744	735
745	736
746	737
747	738
748	739
749	740
750	741
751	742
752	743
753	744
754	745
755	746
756	747
757	748
758	749
759	750
760	751
761	752
762	753
763	754
764	755
765	756
766	757
767	758
768	759
769	760
770	761
771	762
772	763
773	763a
774	763b
775	763c
776	763d
777	764
778	765
779	766
780	767
781	768
782	769
783	770
784	771
785	772
786	773
787	774
788	775
789	776
790	777
791	778
792	779
793	780
794	781
795	782
796	783
797	784
798	785
799	786
800	787
801	788
802	789
803	790
804	791
805	792
806	793
807	794
808	795
809	796
810	797
811	798
812	799
813	800
814	801
815	802
816	803
817	804
818	805
819	806
820	807
821	808
822	809
823	810
824	811
825	812
826	813
827	814
828	815
829	816
830	817
831	818
832	819
833	820
834	821
835	822
836	823
837	824
838	825
839	826
840	827
841	828
842	829
843	830
844	831
845	832
846	833
847	834
848	835
849	836
850	837
851	838
852	839
853	840
854	841
855	842
856	843
857	844
858	845
859	846
860	847
861	848
862	849
863	850
864	851
865	852
866	853
867	854
868	861
869	862
870	863
871	864
872	865
873	866
874	867
875	868
876	869
877	870
878	871
879	872
880	873
881	874
882	875
883	876
884	877
885	878
886	879
887	880
888	881
889	882
890	883
891	884
892	885
893	886
894	887
895	888
896	889
897	890
898	891
899	892
900	893
901	894
902	895
903	896
904	897
905	898
906	899
907	900
908	901
909	902
910	903
911	904
912	905
913	906
914	907
915	908
916	909
917	910
918	911
919	912
920	913
921	914
922	915
923	916
924	917
925	918
926	919
927	920
928	921
929	922
930	923
931	924
932	925
933	926
934	927
935	928
936	929
937	930
938	931
939	932
940	933
941	934
942	935
943	936
944	937
945	938
946	939
947	940
948	941
949	942
950	943
951	944
952	945
953	946
954	947
955	948
956	949
957	950
958	951
959	952
960	953
961	954
962	955
963	956
964	957
965	958
966	959
967	960
968	961
969	962
970	963
971	964
972	965
973	966
974	967
975	968
976	969
977	970
978	971
979	972
980	973
981	974
982	975
983	976
984	977
985	978
986	979
987	980
988	981
989	982
990	983
991	984
992	985
993	986
994	987
995	988
996	989
997	990
998	991
999	992
1000	993
1001	994
1002	995
1003	996
1004	997
1005	998
1006	999
1007	1000
1008	1001
1009	1002
1010	1003
1011	1004
1012	1005
1013	1006
1014	1007
1015	1008
1016	1009
1017	1010
1018	1011
1019	1012
1020	1013
1021	1014
1022	1015
1023	1016
1024	1017
1025	1018
1026	1019
1027	1020
1028	1021
1029	1022
1030	1023
1031	1024
1032	1025
1033	1026
1034	1027
1035	1028
1036	1029
1037	1030
1038	1031
1039	1032
1040	1033
1041	1034
1042	1035
1043	1036
1044	1037
1045	1038
1046	1039
1047	1040
1048	1041
1049	1042
1050	1043
1051	1044
1052	1045
1053	1046
1054	1047
1055	1048
1056	1049
1057	1050
1058	1051
1059	1052
1060	1053
1061	1054
1062	1055
1063	1056
1064	1057
1065	1058
1066	1059
1067	1060
1068	1061
1069	1062
1070	1063
1071	1064
1072	1065
1073	1066
1074	1067
1075	1068
1076	1069
1077	1070
1078	1071
1079	1072
1080	1073
1081	1074
1082	1075
1083	1076
1084	1077
1085	1078
1086	1079
1087	1080
1088	1081
1089	1082
1090	1083
1091	1084
1092	1085
1093	1086
1094	1087
1095	1088
1096	1089
1097	1090
1098	1091
1099	1092
1100	1093
1101	1094
1102	1095
1103	1096
1104	1097
1105	1098
1106	1099
1107	1100
1108	1101
1109	1102
1110	1103
1111	1104
1112	1105
1113	1106
1114	1107
1115	1108
1116	1109
1117	1110
1118	1111
1119	1112
1120	1113
1121	1114
1122	1115
1123	1116
1124	1117
1125	1118
1126	1119
1127	1120
1128	1121
1129	1122
1130	1123
1131	1124
1132	1125
1133	1126
1134	1127
1135	1128
1136	1129
1137	1130
1138	1131
1139	1132
1140	1133
1141	1134
1142	1135
1143	1136
1144	1137
1145	1138
1146	1139
1147	1140
1148	1141
1149	1142
1150	1143
1151	1144
1152	1145
1153	1146
1154	1147
1155	1148
1156	1149
1157	1150
1158	1151
1159	1152
1160	1153
1161	1154
1162	1155
1163	1156
1164	1157
1165	1158
1166	1159
1167	1160
1168	1161
1169	1162
1170	1163
1171	1164
1172	1165
1173	1166
1174	1167
1175	1168
1176	1169
1177	1170
1178	1171
1179	1172
1180	1173
1181	1174
1182	1175
1183	1176
1184	1177
1185	1178
1186	1179
1187	1180
1188	1181
1189	1182
1190	1183
1191	1184
1192	1185
1193	1186
1194	1187
1195	1188
1196	1189
1197	1190
1198	1191
1199	1192
1200	1193
1201	1194
1202	1195
1203	1196
1204	1197
1205	1198
1206	1199
1207	1200
1208	1201
1209	1202
1210	1203
1211	1204
1212	1205
1213	1206
1214	1207
1215	1208
1216	1209
1217	1210
1218	1211
1219	1212
1220	1213
1221	1214
1222	1215
1223	1216
1224	1217
1225	1218
1226	1219
1227	1220
1228	1221
1229	1222
1230	1223
1231	1224
1232	1225
1233	1226
1234	1227
1235	1228
1236	1229
1237	1230
1238	1231
1239	1232
1240	1233
1241	1234
1242	1235
1243	1236
1244	1237
1245	1238
1246	1239
1247	1240
1248	1241
1249	1242
1250	1243
1251	1244
1252	1245
1253	1246
1254	1247
1255	1248
1256	1249
1257	1250
1258	1251
1259	1252
1260	1253
1261	1254
1262	1255
1263	1256
1264	1257
1265	1258
1266	1259
1267	1260
1268	1261
1269	1262
1270	1263
1271	1264
1272	1265
1273	1266
1274	1267
1275	1268
1276	1269
1277	1270
1278	1271
1279	1272
1280	1273
1281	1274
1282	1275
1283	1276
1284	1277
1285	1278
1286	1279
1287	1280
1288	1281
1289	1282
1290	1283
1291	1284
1292	1285
1293	1286
1294	1287
1295	1288
1296	1289
1297	1290
1298	1291
1299	1292
1300	1293
1301	1294
1302	1295
1303	1296
1304	1297
1305	1298
1306	1299
1307	1300
1308	1301
1309	1302
1310	1303
1311	1304
1312	1305
1313	1306
1314	1307
1315	1308
1316	1309
1317	1310
1318	1311
1319	1312
1320	1313
1321	1314
1322	1315
1323	1316
1324	1317
1325	1318
1326	1319
1327	1320
1328	1321
1329	1322
1330	1323
1331	1324
1332	1325
1333	1326
1334	1327
1335	1328
1336	1329
1337	1330
1338	1331
1339	1332
1340	1333
1341	1334
1342	1335
1343	1336
1344	1337
1345	1338
1346	1339
1347	1340
1348	1341
1349	1342
1350	1343
1351	1344
1352	1345
1353	1346
1354	1347
1355	1348
1356	1349
1357	1350
1358	1351
1359	1352
1360	1353
1361	1354
1362	1355
1363	1356
1364	1357
1365	1358
1366	1359
1367	1360
1368	1361
1369	1362
1370	1363
1371	1364
1372	1365
1373	1366
1374	1367
1375	1368
1376	1369
1377	1370
1378	1371
1379	1372
1380	1373
1381	1374
1382	1375
1383	1376
1384	1377
1385	1378
1386	1379
1387	1380
1388	1381
1389	1382
1390	1383
1391	1384
1392	1385
1393	1386
1394	1387
1395	1388
1396	1389
1397	1390
1398	1391
1399	1392
1400	1393
1401	1394
1402	1395
1403	1396
1404	1397
1405	1398
1406	1399
1407	1400
1408	1401
1409	1402
1410	1403
1411	1404
1412	1405
1413	1406
1414	1407
1415	1408
1416	1409
1417	1410
1418	1411
1419	1412
1420	1413
1421	1414
1422	1415
1423	1416
1424	1417
1425	1418
1426	1419
1427	1420
1428	1421
1429	1422
1430	1423
1431	1424
1432	1425
1433	1426
1434	1427
1435	1428
1436	1429
1437	1430
1438	1431
1439	1432
1440	1433
1441	1434
1442	1435
1443	1436
1444	1437
1445	1438
1446	1439
1447	1440
1448	1441
1449	1442
1450	1443
1451	1444
1452	1445
1453	1446
1454	1447
1455	1448
1456	1449
1457	1450
1458	1451
1459	1452
1460	1453
1461	1454
1462	1455
1463	1456
1464	1457
1465	1458
1466	1459
1467	1460
1468	1461
1469	1462
1470	1463
1471	1464
1472	1465
1473	1466
1474	1467
1475	1468
1476	1469
1477	1470
1478	1471
1479	1472
1480	1473
1481	1474
1482	1475
1483	1476
1484	1477
1485	1478
1486	1479
1487	1480
1488	1481
1489	1482
1490	1483
1491	1484
1492	1485
1493	1486
1494	1487
1495	1488
1496	1489
1497	1490
1498	1491
1499	1492
1500	1493
1501	1494
1502	1495
1503	1496
1504	1497
1505	1498
1506	1499
1507	1500
1508	1501
1509	1502
1510	1503
1511	1504
1512	1505
1513	1506
1514	1507
1515	1508
1516	1509
1517	1510
1518	1511
1519	1512
1520	1513
1521	1514
1522	1515
1523	1516
1524	1517
1525	1518
1526	1519
1527	1520
1528	1521
1529	1522
1530	1523
1531	1524
1532	1525
1533	1526
1534	1527
1535	1528
1536	1529
1537	1530
1538	1531
1539	1532
1540	1533
1541	1534
1542	1535
1543	1536
1544	1537
1545	1538
1546	1539
1547	1540
1548	1541
1549	1542
1550	1543
1551	1544
1552	1545
1553	1546
1554	1547
1555	1548
1556	1549
1557	1550
1558	1551
1559	1552
1560	1553
1561	1554
1562	1555
1563	1556
1564	1557
1565	1558
1566	1559
1567	1560
1568	1561
1569	1562
1570	1563
1571	1564
1572	1565
1573	1566
1574	1567
1575	1568
1576	1569
1577	1570
1578	1571
1579	1572
1580	1573
1581	1574
1582	1575
1583	1576
1584	1577
1585	1578
1586	1579
1587	1580
1588	1581
1589	1582
1590	1583
1591	1584
1592	1585
1593	1586
1594	1587
1595	1588
1596	1589
1597	1590
1598	1591
1599	1592
1600	1593
1601	1594
1602	1595
1603	1596
1604	1597
1605	1598
1606	1599
1607	1600
1608	1601
1609	1602
1610	1603
1611	1604
1612	1605
1613	1606
1614	1607
1615	1608
1616	1609
1617	1610
1618	1611
1619	1612
1620	1613
1621	1614
1622	1615
1623	1616
1624	1617
1625	1618
1626	1619
1627	1620
1628	1621
1629	1622
1630	1623
1631	1624
1632	1625
1633	1626
1634	1627
1635	1628
1636	1629
1637	1630
1638	1631
1639	1632
1640	1633
1641	1634
1642	1635
1643	1636
1644	1637
1645	1638
1646	1639
1647	1640
1648	1641
1649	1642
1650	1643
1651	1644
1652	1645
1653	1646
1654	1647
1655	1648
1656	1649
1657	1650
1658	1651
1659	1652
1660	1653
1661	1654
1662	1655
1663	1656
1664	1657
1665	1658
1666	1659
1667	1660
1668	1661
1669	1662
1670	1663
1671	1664
1672	1665
1673	1666
1674	1667
1675	1668
1676	1669
1677	1670
1678	1671
1679	1672
1680	1673
1681	1674
1682	1675
1683	1676
1684	1677
1685	1678
1686	1679
1687	1680
1688	1681
1689	1682
1690	1683
1691	1684
1692	1685
1693	1686
1694	1687
1695	1688
1696	1689
1697	1690
1698	1691
1699	1692
1700	1693
1701	1694
1702	1695
1703	1696
1704	1697
1705	1698
1706	1699
1707	1700
1708	1701
1709	1702
1710	1703
1711	1704
1712	1705
1713	1706
1714	1707
1715	1708
1716	1709
1717	1710
1718	1711
1719	1712
1720	1713
1721	1714
1722	1715
1723	1716
1724	1717
1725	1718
1726	1719
1727	1720
1728	1721
1729	1722
1730	1723
1731	1724
1732	1725
1733	1726
1734	1727
1735	1728
1736	1729
1737	1730
1738	1731
1739	1732
1740	1733
1741	1734
1742	1735
1743	1736
1744	1737
1745	1738
1746	1739
1747	1740
1748	1741
1749	1742
1750	1743
1751	1744
1752	1745
1753	1746
1754	1747
1755	1748
1756	1749
1757	1750
1758	1751
1759	1752
1760	1753
1761	1754
1762	1755
1763	1756
1764	1757
1765	1758
1766	1759
1767	1760
1768	1761
1769	1762
1770	1763
1771	1764
1772	1765
1773	1766
1774	1767
1775	1768
1776	1769
1777	1770
1778	1771
1779	1772
1780	1773
1781	1774
1782	1775
1783	1776
1784	1777
1785	1778
1786	1779
1787	1780
1788	1781
1789	1782
1790	1783
1791	1784
1792	1785
1793	1786
1794	1787
1795	1788
1796	1789
1797	1790
1798	1791
1799	1792
1800	1793
1801	1794
1802	1795
1803	1796
1804	1797
1805	1798
1806	1799
1807	1800
1808	1801
1809	1802
1810	1803
1811	1804
1812	1805
1813	1806
1814	1807
1815	1808
1816	1809
1817	1810
1818	1811
1819	1812
1820	1813
1821	1814
1822	1815
1823	1816
1824	1817
1825	1818
1826	1819
1827	1820
1828	1821
1829	1822
1830	1823
1831	1824
1832	1825
1833	1826
1834	1827
1835	1828
1836	1829
1837	1830
1838	1831
1839	1832
1840	1833
1841	1834
1842	1835
1843	1836
1844	1837
1845	1838
1846	1839
1847	1840
1848	1841
1849	1842
1850	1843
1851	1844
1852	1845
1853	1846
1854	1847
1855	1848
1856	1849
1857	1850
1858	1851
1859	1852
1860	1853
1861	1854
1862	1855
1863	1856
1864	1857
1865	1858
1866	1859
1867	1860
1868	1861
1869	1862
1870	1863
1871	1864
1872	1865
1873	1866
1874	1867
1875	1868
1876	1869
1877	1870
1878	1871
1879	1872
1880	1873
1881	1874
1882	1875
1883	1876
1884	1877
1885	1878
1886	1879
1887	1880
1888	1881
1889	1882
1890	1883
1891	1884
1892	1885
1893	1886
1894	1887
1895	1888
1896	1889
1897	1890
1898	1891
1899	1892
1900	1893
1901	1894
1902	1895
1903	1896
1904	1897
1905	1898
1906	1899
1907	1900
1908	1901
1909	1902
1910	1903
1911	1904
1912	1905
1913	1906
1914	1907
1915	1908
1916	1909
1917	1910
1918	1911
1919	1912
1920	1913
1921	1914
1922	1915
1923	1916
1924	1917
1925	1918
1926	1919
1927	1920
1928	1921
1929	1922
1930	1923
1931	1924
1932	1925
1933	1926
1934	1927
1935	1928
1936	1929
1937	1930
1938	1931
1939	1932
1940	1933
1941	1934
1942	1935
1943	1936
1944	1937
1945	1938
1946	1939
1947	1940
1948	1941
1949	1942
1950	1943
1951	1944
1952	1945
1953	1946
1954	1947
1955	1948
1956	1949
1957	1950
1958	1951
1959	1952
1960	1953
1961	1954
1962	1955
1963	1956
1964	1957
1965	1958
1966	1959
1967	1960
1968	1961
1969	1962
1970	1963
1971	1964
1972	1965
1973	1966
1974	1967
1975	1968
1976	1969
1977	1970
1978	1971
1979	1972
1980	1973
1981	1974
1982	1975
1983	1976
1984	1977
1985	1978
1986	1979
1987	1980
1988	1981
1989	1982
1990	1983
1991	1984
1992	1985
1993	1986
1994	1987
1995	1988
1996	1989
1997	1990
1998	1991
1999	1992
[truncated: 3,065 more rows]

## Sheet: A>C
28s location	forward strand reference base	WT NaBH4 2-NH2-d-ATP HIV	75% WT NaBH4 2-NH2-d-ATP HIV	50% WT NaBH4 2-NH2-d-ATP HIV	25% WT NaBH4 2-NH2-d-ATP HIV	WT untreated 2-NH2-d-ATP HIV	WT untreated dNTPs HIV	WT NaBH4 d2-NH2-d-ATP SSIV	75% WT NaBH4 dNH2-ATP SSIV	50% WT NaBH4 2-NH2-d-ATP SSIV	25% WT NaBH4 2-NH2-d-ATP SSIV	WT untreated 2-NH2-d-ATP SSIV	WT untreated dNTPs SSIV	WT NaBH4 dNTPs HIV	WT NaBH4 dNTPs SSIV
5	A	9.35754	9.90099	9.34039	12.7804	11.0465	14.368	3.24357	4.13724	4.19783	4.36573	3.79391	4.99018	13.6435	4.76415
10	A	0.985568	1.00475	0.64257	0.970414	0.65445	1.0982	0.28245	0.258398	0.227979	0.481983	0.515254	0.292438	0.544731	0.190058
12	A	0.266876	0.28002	0.257827	0.523903	0.0401043	0.76666	0.134311	0.0990208	0.114811	0.362632	0.276274	0.12205	0.350501	0.118254
15	A	0.222943	0.404239	0.328213	0.390625	0.389688	0.830649	0.0825454	0.143526	0.107233	0.133363	0.122699	0.125628	0.659341	0.190177
17	A	0.159348	0.395791	0.340615	0.49109	0.515464	0.984188	0.118939	0.0774866	0.0974523	0.0405022	0.0770475	0.112494	0.687957	0.109985
25	A	0.152663	0.226189	0.160852	0.245257	0.245961	0.265537	0.313223	0.344928	0.287349	0.383691	0.294901	0.368758	0.25641	0.301764
33	A	0.00582298	0.0166886	0.005247	0.0125913	0.0144559	0.0595545	0.018401	0.0373369	0.0130984	0.0358444	0.0180496	0.0228083	0.0373362	0.0238124
34	A	0.00754888	0.0202487	0.00255135	0.0122347	0.00563237	0.0451858	0.011214	0.0227552	0.00801655	0.0173928	0.0100543	0.0138156	0.0554468	0.0144088
38	A	0.0316333	0.0301324	0.0213154	0.045231	0.0393102	0.0721085	0.0482231	0.0510714	0.100438	0.0699658	0.0735923	0.0267023	0.116473	0.0278288
39	A	0.0334482	0.0142962	0.0202134	0.0268032	0.0223986	0.0635346	0.0442611	0.0489366	0.057407	0.030931	0.0296702	0.0365144	0.0585029	0.0381981
42	A	0.0193555	0.0309613	0.030177	0.0309207	0.0191305	0.0772175	0.00967324	0.0333503	0.0213581	0.0198118	0.0176134	0.0248917	0.0680031	0.0184191
44	A	0.0157886	0.0252232	0.0189853	0.0377919	0.0327156	0.0651445	0.0206705	0.0572552	0.0569991	0.0311392	0.0406052	0.0263145	0.0575622	0.0226222
47	A	0.0219515	0.0250442	0.0251398	0.0872927	0.0370379	0.0865995	0.016777	0.0284252	0.0193306	0.0237558	0.0318026	0.0188786	0.0827224	0.00746324
51	A	0.271514	0.255619	0.201739	0.468847	0.291234	0.43039	0.230604	0.310187	0.228429	0.236036	0.263606	0.410238	0.331353	0.301425
56	A	0.103659	0.102395	0.09736	0.140249	0.11241	0.216095	0.165207	0.206043	0.230275	0.164011	0.246099	0.236962	0.244339	0.235917
59	A	0.0460829	0.0330807	0.0253559	0.0394019	0.039353	0.0886358	0.0474566	0.0474482	0.0666793	0.0451136	0.0651445	0.0436848	0.0721178	0.0256983
61	A	0.125974	0.170491	0.222237	0.216837	0.224901	0.4275	0.0379331	0.0701471	0.0610868	0.0340615	0.0576686	0.0437792	0.432783	0.0570023
62	A	0.12839	0.166932	0.254701	0.242144	0.20779	0.326182	0.075457	0.0790668	0.0781454	0.0768027	0.110846	0.0681754	0.427722	0.0427124
64	A	0.0312523	0.0317872	0.0586921	0.065887	0.0345692	0.114223	0.0221295	0.0333834	0.0307171	0.0246839	0.0429666	0.0266291	0.112569	0.0139241
65	A	0.167202	0.181809	0.20788	0.216732	0.185737	0.384814	0.0140787	0.0153129	0.016411	0.0174295	0.031517	0.0161292	0.501818	0.0176326
66	A	0.156139	0.176482	0.21242	0.223476	0.190492	0.394726	0.0194534	0.022897	0.0233163	0.0266652	0.017439	0.014819	0.531034	0.0188944
69	A	0.0913413	0.106635	0.140097	0.13541	0.116641	0.380542	0.0358653	0.0446181	0.0717189	0.026178	0.0600413	0.0385668	0.546872	0.0243889
70	A	0.0923191	0.118508	0.109663	0.131764	0.136217	0.392001	0.0579704	0.0977895	0.134211	0.0568953	0.104642	0.0754288	0.607207	0.0794838
73	A	0.0303119	0.0396007	0.0358742	0.0819876	0.0690397	0.106645	0.0763351	0.0865879	0.0965135	0.0650503	0.0971155	0.073526	0.254518	0.0540969
76	A	0.0400986	0.0473556	0.0498805	0.059252	0.0591442	0.0870446	0.181451	0.254897	0.201905	0.157252	0.198645	0.148938	0.138215	0.142946
84	A	0.0381799	0.0403772	0.0123914	0.0649957	0.064571	0.07563	0.036542	0.0223045	0.0355334	0.0308226	0.0461158	0.0326535	0.092989	0.0298771
87	A	0.0279825	0.0298789	0.0217128	0.038423	0.0437873	0.0613225	0.020997	0.0391127	0.0151953	0.0230005	0.0186116	0.0363204	0.0766518	0.0202944
88	A	0.0452958	0.0341768	0.0269234	0.0407934	0.0445097	0.0871676	0.0465407	0.068105	0.130074	0.0351759	0.0717948	0.0619093	0.0750939	0.0422165
94	A	0.0515532	0.0498048	0.068403	0.0827145	0.0912366	0.103062	0.0360222	0.0315837	0.0308125	0.0224701	0.0321797	0.0354354	0.134539	0.0333972
98	A	0.0324337	0.0522071	0.0382197	0.061658	0.064925	0.0589612	0.0336212	0.0419014	0.0409774	0.0223914	0.0468629	0.0471014	0.136749	0.0354012
99	A	0.0251752	0.0441212	0.041425	0.0482374	0.065159	0.097152	0.0638117	0.0795101	0.102733	0.071038	0.0862555	0.0885285	0.119795	0.0456328
101	A	0.056988	0.0693579	0.0571837	0.0690171	0.119038	0.0909075	0.100184	0.112199	0.129466	0.0952898	0.1459	0.166257	0.127478	0.123452
105	A	0.0197085	0.0307409	0.0327327	0.0242471	0.0275042	0.0335057	0.0661753	0.0378327	0.046386	0.0246057	0.0514076	0.0572262	0.0424395	0.0463223
106	A	0.0127487	0.0212824	0.0133809	0.0307245	0.0418306	0.0392922	0.0416798	0.0398248	0.0678566	0.0362683	0.0456783	0.0452781	0.0424475	0.0608932
108	A	0.0134452	0.0171829	0.0188098	0.0362074	0.0230858	0.0362277	0.0596261	0.0558421	0.0593702	0.0407417	0.0427323	0.0583658	0.035905	0.0477146
113	A	0.0410371	0.0335989	0.0269575	0.0521837	0.0458106	0.0492713	0.120313	0.135209	0.172911	0.101163	0.0745029	0.130729	0.0739676	0.130923
120	A	0.02283	0.0228835	0.0033117	0.0173628	0.0182085	0.0317753	0.0424367	0.0680279	0.0638473	0.0340491	0.0394829	0.0553997	0.0502386	0.0589464
121	A	0.016001	0.01607	0.0134123	0.028876	0.0223435	0.0265305	0.0194097	0.025334	0.0556203	0.0179624	0.0283023	0.0157711	0.0252752	0.0268197
147	A	0.0132366	0.0154878	0.0107637	0.015852	0.0174032	0.0194742	0.00993986	0.0140347	0.00855476	0.00334202	0.0135291	0.0171035	0.0225383	0.00727246
149	A	0.0210944	0.0196876	0.0171729	0.013427	0.0136809	0.0211977	0.00826378	0.00416693	0.0097671	0.00690123	0.0131437	0.0077601	0.0204165	0.00876106
158	A	0.029913	0.0298781	0.0321375	0.02395	0.0172634	0.0347021	0.0409076	0.0414702	0.034927	0.0300968	0.0419595	0.0556048	0.0409576	0.0256159
162	A	0.0199585	0.0157909	0.0155094	0.0186379	0.0221578	0.0250404	0.0527676	0.0470545	0.0649691	0.0320059	0.0244241	0.0298454	0.0415914	0.0300933
163	A	0.0233993	0.0201776	0.0148858	0.0371909	0.0168088	0.0271913	0.0398369	0.0577773	0.0524689	0.0330568	0.0352774	0.0405984	0.0376481	0.0391516
165	A	0.173786	0.160232	0.177567	0.1856	0.147721	0.128927	0.156149	0.15794	0.166223	0.106466	0.0661673	0.10498	0.22392	0.0808478
197	A	0.0695723	0.0392557	0.0500444	0.0608021	0.0700497	0.094	0.164736	0.219655	0.218451	0.181925	0.20391	0.206618	0.0796712	0.168543
198	A	0.0327963	0.0373274	0.0273087	0.0390006	0.03924	0.0757089	0.0630424	0.0695271	0.0906684	0.0623298	0.0611014	0.080983	0.0397184	0.0646313
208	A	0.059948	0.0689536	0.0792393	0.0868669	0.115251	0.0762791	0.0274074	0.0262881	0.0418297	0.0251754	0.0352762	0.0410664	0.0520989	0.0200554
212	A	0.0830279	0.0854436	0.0842269	0.119975	0.114319	0.115138	0.162161	0.187189	0.310878	0.144516	0.219792	0.261449	0.0630615	0.158974
218	A	0.105325	0.0942478	0.0758407	0.147707	0.0795255	0.104797	0.21346	0.239472	0.285533	0.171629	0.175298	0.318709	0.0945804	0.22254
227	A	0.230964	0.212194	0.200469	0.307985	0.201118	0.183	0.266309	0.313619	0.47538	0.193468	0.383142	0.367674	0.198473	0.224318
235	A	0.0551935	0.0812954	0.0379713	0.0840318	0.071385	0.0443884	0.0379954	0.052964	0.0783999	0.0554201	0.079952	0.0859535	0.0570796	0.089134
243	A	0.0596783	0.0394861	0.025835	0.0812172	0.0571798	0.055226	0.0639307	0.0852562	0.104958	0.0719291	0.107439	0.0841086	0.0695343	0.0876471
279	A	0.0744038	0.0886447	0.105517	0.0927302	0.124944	0.0924451	0.173224	0.196414	0.246287	0.113024	0.177255	0.169477	0.100184	0.155242
295	A	0.0427492	0.0414428	0.0382587	0.0593852	0.0362803	0.0307628	0.0314321	0.048328	0.0359422	0.0147717	0.0287494	0.0312469	0.038805	0.0284525
296	A	0.0202799	0.0200558	0.016723	0.0274887	0.0193847	0.0380835	0.0234739	0.0200286	0.0357755	0.0250449	0.0149815	0.0389212	0.0399879	0.0369517
300	A	0.0647608	0.0736035	0.0658619	0.0656541	0.0431589	0.0389369	0.0957917	0.116696	0.122972	0.0899997	0.0877602	0.0585394	0.0399545	0.0423639
305	A	0.0248458	0.0280806	0.0386107	0.047619	0.0408956	0.0564133	0.0637247	0.0588501	0.0714703	0.0384951	0.0470796	0.0652032	0.0443456	0.0574933
306	A	0.0258221	0.0393199	0.0387643	0.0384479	0.041066	0.0600935	0.0266074	0.0274157	0.0377658	0.0251766	0.0342803	0.0385124	0.0679615	0.0453554
307	A	0.157538	0.147758	0.120976	0.171268	0.104552	0.094171	0.0492015	0.0616641	0.0938062	0.0458756	0.0657152	0.0602067	0.12947	0.0627243
317	A	0.020841	0.0263703	0.0219137	0.0185256	0.0345446	0.07241	0.0146137	0.0220428	0.00923142	0.0130316	0.00874508	0.00696379	0.0504195	0.00884862
318	A	0.0234681	0.0200952	0.0141172	0.0176854	0.0431454	0.0472875	0.0213257	0.00552616	0.00661279	0.00581218	0.0146165	0.0104637	0.0450662	0.00354956
319	A	0.0506453	0.0445795	0.0410088	0.0555969	0.0586904	0.0977982	0.0601026	0.0401345	0.0464962	0.0407456	0.0570893	0.0384259	0.0722154	0.0410172
324	A	0.0261068	0.0290934	0.0286289	0.0320139	0.0379491	0.11111	0.264459	0.30422	0.339504	0.176918	0.226062	0.245942	0.120505	0.136897
328	A	0.0459107	0.0359358	0.0356633	0.0442112	0.0436711	0.0544026	0.0364125	0.0395964	0.0674057	0.0223847	0.0278888	0.0202109	0.0645776	0.0217541
329	A	0.0388268	0.0408026	0.0322361	0.0424813	0.0412656	0.0357683	0.0619125	0.0810504	0.106466	0.0270209	0.0900859	0.0239283	0.0433492	0.00728147
334	A	0.0477315	0.0216162	0.0529233	0.0376272	0.0578746	0.0474048	0.115106	0.157409	0.159149	0.0818706	0.153632	0.139497	0.0640919	0.0582294
335	A	0.0345075	0.0256824	0.0401726	0.030542	0.0432144	0.0417524	0.0658571	0.059611	0.115924	0.0516529	0.0656563	0.0498667	0.050084	0.0265697
336	A	0.0193738	0.0180002	0.026244	0.031099	0.0247447	0.0278727	0.0162562	0.0172268	0.0288605	0.00844153	0.0221023	0.026272	0.0421185	0.0185663
338	A	0.207206	0.251905	0.461459	0.235988	0.487304	0.163346	0.184934	0.175768	0.198768	0.0947332	0.166781	0.0678738	0.305508	0.111932
344	A	0.483079	0.48376	0.618099	0.445647	0.772223	0.480517	0.29313	0.389085	0.398308	0.204957	0.397771	0.2427	0.393346	0.169344
347	A	0.113575	0.114143	0.189816	0.151724	0.260382	0.350387	0.0553218	0.103313	0.114104	0.088188	0.0805881	0.132839	0.263186	0.0648624
349	A	0.077069	0.0859638	0.127622	0.168693	0.220921	0.287364	0.226429	0.222319	0.237426	0.167209	0.238892	0.2996	0.283103	0.162015
353	A	0.0775319	0.0759018	0.0749923	0.0730994	0.161939	0.208132	0.434311	0.442109	0.404208	0.297523	0.44897	0.461052	0.143735	0.316844
355	A	0.0147878	0.0177014	0.0264547	0.0453325	0.03946	0.0939323	0.156444	0.190999	0.167238	0.100584	0.148743	0.236299	0.0883585	0.139337
359	A	0.0188154	0.0188901	0.0262942	0.0260177	0.0248766	0.0486888	0.133788	0.16652	0.18622	0.107456	0.199325	0.23289	0.0449084	0.120257
360	A	0.0238262	0.0272381	0.0253721	0.0241604	0.0428158	0.0645516	0.109335	0.101547	0.116347	0.0675176	0.119448	0.12515	0.0381667	0.0788091
362	A	0.0132286	0.0132921	0.0180649	0.0202723	0.0177372	0.0303821	0.0064915	0.0190177	0.0180873	0.0114424	0.0123913	0.0192885	0.0344471	0.00445802
363	A	0.0198927	0.0108285	0.0138323	0.0121921	0.0190293	0.0373351	0.0114716	0.00873317	0.00828267	0.00824674	0.00416519	0.011096	0.0313069	0.00449559
366	A	0.0181991	0.0215837	0.0126924	0.0344835	0.0214722	0.0565876	0.00481943	0.0239087	0.0322388	0.0275943	0.0368913	0.0302672	0.0542446	0.0264539
371	A	0.0301336	0.0337704	0.0203732	0.0463808	0.021738	0.0886574	0.0829951	0.0780255	0.0764606	0.0650679	0.115611	0.0818624	0.0790501	0.0957932
372	A	0.0235124	0.0212093	0.0161535	0.0372613	0.0244034	0.0682366	0.101302	0.0813241	0.106762	0.135011	0.125461	0.128169	0.0747997	0.0614024
376	A	0.0124396	0.0176932	0.0117623	0.019475	0.0177426	0.0346428	0.014317	0.0329924	0.0322626	0.0132622	0.0249938	0.0284704	0.0280919	0.0271824
377	A	0.0132634	0.0126278	0.0138781	0.0174141	0.0164474	0.0344937	0.0142978	0.0224834	0.0266073	0.025025	0.0535246	0.064025	0.0279501	0.0309993
378	A	0.00412797	0.0167659	0.00530763	0.0152958	0.0150923	0.0123247	0.0128209	0.0149296	0.0334551	0.0131988	0.0391021	0.0236395	0.0158395	0.00963335
383	A	0.00813981	0.011558	0.0010295	0.0119522	0.0110697	0.0226697	0.0205555	0.00573403	0.00535053	0.00565115	0.0187196	0.02054	0.0129615	0.00559472
384	A	0.00804991	0.00652726	0.00812992	0.0108127	0.0182433	0.0292678	0.0161921	0.00845487	0.0131752	0.00278214	0.0116953	0.0203101	0.0174386	0.007414
385	A	0.00239666	0.00728474	0.00605009	0.00194875	0.00845482	0.0185864	0.00805499	0.00280403	0.00262292	0.0027692	0.00830275	0.0090322	0.0151465	0.00185598
386	A	0.00318862	0.0016168	0.00805283	0.00485267	0.00482457	0.0132326	0.00533739	0.00139367	0.00522889	0	0.00164479	0.00670616	0.0128739	0.00555401
388	A	0.011926	0.00968281	0.00401836	0.0154983	0.0204607	0.0330046	0.00397762	0.00692732	0.022147	0.00683677	0.0180257	0.0243293	0.0166345	0.011032
389	A	0.0182183	0.0200906	0.00900171	0.0231569	0.021554	0.0512888	0.0013181	0.00827141	0.00777827	0.00679763	0.00814584	0.00660953	0.0414013	0.00549129
395	A	0.0243207	0.034705	0.0190414	0.0239353	0.0347139	0.0527064	0.0203811	0.0147975	0.0241019	0.00656823	0.0269649	0.0342165	0.0462775	0.0180021
396	A	0.031761	0.0406919	0.0417931	0.041767	0.0521864	0.0405157	0.0270528	0.0339942	0.0475279	0.0305433	0.056026	0.05592	0.0520039	0.0544573
398	a	0.0266758	0.0244942	0.0201548	0.0231808	0.0295024	0.0497327	0.0656221	0.0678791	0.118297	0.0440214	0.0716631	0.0715452	0.0538966	0.0477628
400	a	0.038208	0.0446922	0.0436023	0.0440804	0.0554444	0.057971	0.341245	0.396572	0.486891	0.316942	0.421031	0.237702	0.0532773	0.210913
402	A	0.0181557	0.0204666	0.0427887	0.0337718	0.04051	0.0597053	0.072383	0.106869	0.114286	0.0575374	0.0488078	0.129981	0.0417781	0.0697021
407	A	0.032557	0.0379179	0.0581312	0.0629177	0.0738602	0.184009	0.0447421	0.0534498	0.0682703	0.0176554	0.0649351	0.0611662	0.120039	0.0343448
408	A	0.127198	0.145061	0.147875	0.130749	0.125591	0.180905	0.0357963	0.0598086	0.100762	0.0531108	0.0831706	0.149701	0.189726	0.0502492
410	A	0.101671	0.0979381	0.155286	0.129435	0.178276	0.286441	0.247612	0.239845	0.322248	0.210526	0.34273	0.401637	0.154086	0.219354
418	A	0.243565	0.286269	0.298937	0.352538	0.338771	0.455704	0.0706409	0.0937108	0.0905322	0.0792463	0.0917695	0.108032	0.478716	0.0800245
419	A	0.209638	0.238687	0.233814	0.350268	0.296064	0.347417	0.0257807	0.0370011	0.0633945	0.0351179	0.0949957	0.0503227	0.366257	0.0351222
420	A	0.146082	0.15569	0.16729	0.253881	0.147716	0.236017	0.0342941	0.0457095	0.0443073	0.0262964	0.0571194	0.0959944	0.269092	0.04212
426	A	0.0330129	0.0373514	0.0334924	0.0462279	0.069946	0.100705	0.16604	0.240483	0.247144	0.147755	0.159574	0.146776	0.0673193	0.165182
427	A	0.0227015	0.0325364	0.0304599	0.0331231	0.0492102	0.0468028	0.0377868	0.0164727	0.0813008	0.0346918	0.0700317	0.0528296	0.0382604	0.0172776
429	A	0.0201586	0.0235871	0.0358521	0.0242501	0.0356963	0.0487757	0.106734	0.105146	0.123844	0.0775399	0.11201	0.120266	0.046757	0.0701882
433	A	0.0524715	0.0497773	0.0754083	0.0425106	0.0549106	0.102205	0.360642	0.437082	0.392684	0.375412	0.312199	0.244355	0.0846209	0.245493
434	A	0.060719	0.0683985	0.0578095	0.0653158	0.0927332	0.162821	0.219816	0.256215	0.263728	0.230452	0.17397	0.207367	0.0853408	0.199606
435	A	0.109832	0.127037	0.149925	0.0845812	0.158998	0.259374	0.134559	0.120734	0.214996	0.104984	0.191638	0.296996	0.200621	0.137496
452	A	0.0933847	0.0652199	0.103097	0.0892389	0.0750296	0.126514	0.230714	0.374973	0.275388	0.183177	0.199882	0.216511	0.171835	0.193804
463	A	0.0662643	0.0640915	0.0835969	0.0584515	0.0823445	0.0931927	0.131109	0.144588	0.160524	0.11216	0.118993	0.118198	0.130969	0.106921
466	A	0.0306373	0.0261015	0.0294504	0.04	0.0498968	0.194769	0.013587	0.0153883	0.0325536	0.00939518	0.0175768	0.0140467	0.116832	0.0257165
470	A	0.0552713	0.0515632	0.0649773	0.0334092	0.0333449	0.0490018	0.131865	0.121686	0.136791	0.102646	0.0997933	0.0869194	0.0596757	0.0977053
471	A	0.0520702	0.0796896	0.0540991	0.0462953	0.0268172	0.0295567	0.245635	0.240793	0.171139	0.234564	0.0874076	0.0840696	0.0805935	0.201952
509	A	0.00619857	0.0132205	0.024493	0.0125284	0.0123927	0.0162259	0.0427185	0.0453823	0.0709826	0.0286394	0.0555564	0.036039	0.0264556	0.0249342
535	A	0.314632	0.357805	0.348798	0.366407	0.224286	0.179319	0.204258	0.298358	0.304802	0.189425	0.328033	0.239114	0.256042	0.244002
543	A	0.399965	0.538968	0.442809	0.554635	0.396182	0.413255	0.362319	0.401318	0.414516	0.274507	0.385871	0.375493	0.626468	0.339077
586	A	0.481541	0.773054	0.239091	1.11615	0.389194	0.952626	0.875	1.05304	1.17521	0.78814	1.36218	1.39506	0.62312	0.77332
649	A	0.0956336	0.095839	0.116818	0.109869	0.0948634	0.125252	0.059058	0.0612206	0.0632738	0.073496	0.0448625	0.0579816	0.120766	0.0692503
660	A	0.0472561	0.0359203	0.0789841	0.053032	0.0726642	0.0691631	0.0880973	0.149482	0.200571	0.0796305	0.178499	0.183425	0.0651959	0.0971956
667	A	0.0336934	0.0339924	0.0702503	0.0407218	0.0458375	0.0797623	0.0936561	0.120069	0.156897	0.0737667	0.153895	0.157226	0.0520171	0.0747861
686	A	0.0160746	0.0168979	0.0317145	0.016775	0.0367987	0.0408968	0.0505668	0.0760309	0.101032	0.0568919	0.068619	0.0661665	0.0350651	0.0682439
692	A	0.0309942	0.0256682	0.0425044	0.0454368	0.0583375	0.0547325	0.30302	0.417515	0.564558	0.27204	0.389082	0.204157	0.0318609	0.141684
711	A	0.0542663	0.0752357	0.106256	0.0667624	0.132182	0.144703	0.0974264	0.119793	0.192742	0.0690468	0.139007	0.215151	0.152528	0.103609
723	A	0.140655	0.185044	0.251811	0.269825	0.221044	0.235664	0.193072	0.264044	0.269121	0.191823	0.253762	0.324919	0.274093	0.223182
732	A	0.121136	0.121204	0.2032	0.123604	0.225933	0.303108	0.186762	0.172944	0.167146	0.135145	0.16875	0.146613	0.187111	0.117686
733	A	0.123562	0.135255	0.185323	0.135462	0.201572	0.254021	0.176037	0.160288	0.144512	0.0967274	0.15916	0.158312	0.158027	0.117022
746	A	0.0558824	0.0697549	0.0695245	0.097429	0.0925226	0.0981087	0.078073	0.106316	0.0764998	0.0857287	0.0851305	0.108706	0.0911073	0.098306
747	A	0.147509	0.170707	0.13048	0.174646	0.193795	0.135024	0.104093	0.140308	0.140639	0.102444	0.125835	0.111797	0.134449	0.0860238
832	A	0.0942317	0.129088	0.186883	0.0968289	0.123789	0.0762532	0.0484426	0.0608481	0.0963034	0.0587544	0.121456	0.141453	0.0478612	0.0549073
887	A	0.0135065	0.019233	0.0311042	0.0266625	0.0268268	0.0380435	0.0627986	0.0682082	0.0522587	0.0292366	0.0716685	0.0611604	0.0335338	0.0435572
891	A	0.0184064	0.0332631	0.0348521	0.0319115	0.0420747	0.0546048	0.102154	0.145458	0.160247	0.0884015	0.117074	0.110711	0.0612732	0.11255
892	A	0.0365344	0.029289	0.0206935	0.0337938	0.0374823	0.0444417	0.172342	0.162756	0.26279	0.126678	0.211212	0.158674	0.0536803	0.132177
893	A	0.470412	0.347025	0.260687	0.202973	0.337061	0.371021	0.543524	0.473896	0.467474	0.244569	0.607661	0.666401	0.470674	0.63735
903	A	0.0342942	0.0161833	0.0225332	0.0293194	0.0136986	0.0270917	0.0660536	0.078545	0.152092	0.0711219	0.0828081	0.231509	0.0547545	0.103818
909	A	0.0464732	0.0335869	0.0499281	0.0536023	0.0617433	0.0449273	0.116436	0.125998	0.162265	0.0874544	0.136855	0.143737	0.0775576	0.102189
911	A	0.0999217	0.130471	0.115488	0.137723	0.0890785	0.114055	0.292563	0.338335	0.500913	0.200754	0.397371	0.593153	0.172697	0.412872
923	A	0.0548104	0.0620878	0.0483072	0.0901458	0.0565434	0.0662629	0.0900566	0.150744	0.139204	0.10753	0.147816	0.164094	0.0940543	0.0976699
926	A	0.0723982	0.0548005	0.0603567	0.0755858	0.0494469	0.0688215	0.0663577	0.0751508	0.122491	0.0626399	0.0915722	0.130102	0.0875833	0.0813489
929	A	0.0784918	0.0533596	0.0612162	0.0789779	0.059985	0.0773683	0.121061	0.141212	0.19733	0.0985107	0.132253	0.198957	0.107404	0.150758
937	A	0.102993	0.079785	0.07441	0.106973	0.0802818	0.102838	0.125518	0.119175	0.0876174	0.103486	0.108921	0.120293	0.106247	0.0946304
938	A	0.123686	0.149048	0.128252	0.172145	0.132671	0.193037	0.0849582	0.102081	0.121091	0.0906341	0.0893365	0.12462	0.259763	0.0765012
950	A	0.204885	0.182042	0.121638	0.270942	0.128995	0.119447	0.105601	0.147316	0.167446	0.123968	0.123306	0.128477	0.170675	0.132887
954	A	0.0619963	0.0505753	0.0522995	0.0716488	0.0699071	0.0747038	0.0735117	0.0828317	0.0833736	0.0590963	0.0893822	0.0642424	0.0980028	0.0677742
958	A	0.0699225	0.0784755	0.0950524	0.0808522	0.108947	0.126875	0.113705	0.103547	0.120991	0.0860338	0.116142	0.0906975	0.129148	0.079215
960	A	0.0738307	0.0808763	0.0909719	0.114445	0.113994	0.166023	0.154301	0.162641	0.183518	0.110196	0.214741	0.183952	0.143079	0.122462
994	A	0.105105	0.116411	0.270321	0.131716	0.183568	0.314116	0.167218	0.234994	0.307738	0.200694	0.159431	0.218167	0.315816	0.280336
1006	A	0.00330055	0.022542	0.023214	0.0275927	0.0113499	0.0257356	0.0252011	0.0283478	0.0280433	0.0168812	0.0315299	0.0443273	0.0293415	0.0146542
1007	A	0.0167684	0.0228842	0.0293789	0.03621	0.0382482	0.0431369	0.0735402	0.0850674	0.0793021	0.0991959	0.102098	0.0982387	0.0466715	0.105223
1017	A	0.0788955	0.0638352	0.0654879	0.0876723	0.0609112	0.125478	0.111003	0.130569	0.13547	0.0898204	0.0733126	0.127043	0.113277	0.0820692
1072	A	0.0876871	0.107804	0.1657	0.0872875	0.164891	0.214642	0.583922	0.928023	1.36101	0.480058	0.905912	0.720623	0.369366	0.522905
1081	A	0.0496662	0.0937082	0.118013	0.0970529	0.116074	0.159506	0.160112	0.169779	0.178752	0.127428	0.161374	0.224118	0.119594	0.154757
1089	A	0.184858	0.188311	0.193516	0.195957	0.223236	0.371296	0.144261	0.138377	0.193001	0.0919221	0.165094	0.187507	0.276644	0.135397
1100	A	0.801962	0.734033	0.773183	0.99447	1.00053	1.34584	0.381706	0.480769	0.59027	0.375453	0.387867	0.716707	1.22814	0.433839
1130	A	0.160398	0.291175	0.395257	0.151701	0.270093	0.363099	0.123614	0.128256	0.18325	0.147798	0.144114	0.296992	0.507893	0.239416
1169	A	0.0892649	0.060024	0.102366	0.152758	0.0725498	0.104592	0.0790175	0.0866983	0.0839848	0.0552098	0.0588868	0.0955422	0.155265	0.104626
1178	A	0.100739	0.0875241	0.0409658	0.0538111	0.085305	0.0522322	0.32091	0.39186	0.451777	0.282784	0.388958	0.328055	0.0618257	0.202862
1216	A	0.0465345	0.0579401	0.0739565	0.0996385	0.0450372	0.0843308	0.111479	0.0831398	0.0996623	0.0831867	0.0747239	0.110553	0.087977	0.0641001
1232	A	0.0359832	0.0326074	0.0458264	0.0548103	0.0757797	0.087744	0.131572	0.143845	0.19663	0.0983526	0.136631	0.182418	0.0594437	0.0995237
1248	A	0.0573105	0.0444256	0.0814681	0.0443911	0.093147	0.11498	0.357659	0.504561	0.571604	0.349547	0.462041	0.547005	0.106159	0.422742
1249	A	0.0297994	0.0232568	0.0224014	0.0522876	0.0221784	0.0163724	0.0516596	0.0381374	0.0449568	0.0486145	0.0318179	0.0460246	0.0422139	0.0606566
1251	A	0.10782	0.0993175	0.138521	0.107321	0.0863634	0.123411	0.445221	0.572316	0.657014	0.421316	0.518086	0.646925	0.133012	0.498116
1257	A	0.0367825	0.0422369	0.0346479	0.0497135	0.0310023	0.0464554	0.0164965	0.0143673	0.00882659	0.0169108	0.0187705	0.0135987	0.0451278	0.0277071
1264	A	0.0424572	0.0452172	0.0220295	0.0556342	0.0309796	0.0415618	0.0585095	0.0487277	0.0831814	0.0550265	0.0662139	0.0615314	0.0780933	0.0555289
1268	A	0.0355658	0.0183584	0.0238882	0.0578035	0.0376999	0.0419923	0.117362	0.1461	0.182812	0.115936	0.174216	0.163289	0.0408874	0.121436
1273	A	0.258309	0.231673	0.154411	0.276679	0.246473	0.302734	0.352769	0.453822	0.402026	0.386245	0.353692	0.44019	0.327547	0.403886
1288	A	0.0422543	0.045545	0.0408896	0.0671592	0.0429694	0.0576052	0.0449388	0.0607137	0.0541138	0.0574173	0.0472824	0.0511102	0.0542511	0.0606138
1297	A	0.113351	0.157627	0.130928	0.165168	0.200412	0.178989	0.100061	0.148789	0.130645	0.094107	0.0714796	0.068355	0.179214	0.0690078
1301	A	0.173258	0.22515	0.192585	0.268022	0.233684	0.309738	0.480215	0.554918	0.630134	0.365965	0.485822	0.426625	0.262564	0.274737
1306	A	0.154583	0.174135	0.272436	0.211973	0.316086	0.559399	0.395978	0.454693	0.641672	0.391479	0.553315	0.443347	0.313073	0.420757
1316	a	2.61479	2.61295	2.71877	2.60524	1.88516	9.6706	0.483471	0.531735	0.551708	0.644681	0.156573	0.587672	14.6585	2.15874
1317	a	0.0368491	0.0374181	0.0382027	0.0594047	0.0699301	0.100899	0.0303978	0.0529738	0.0701631	0.0395746	0.0891415	0.0445349	0.0895272	0.0292005
1318	A	0.0654413	0.0963984	0.0853996	0.10657	0.168731	0.193041	0.121967	0.16414	0.316827	0.134055	0.206635	0.159368	0.152976	0.187683
1320	a	0.240011	0.308044	0.301825	0.261527	0.294379	0.307873	0.131451	0.191258	0.21778	0.131707	0.211096	0.154598	0.280231	0.0793021
1324	A	0.201448	0.177985	0.166806	0.209091	0.268916	0.339855	0.114733	0.110962	0.216579	0.0493218	0.12456	0.143392	0.249189	0.109151
1327	A	0.215235	0.292446	0.291906	0.346265	0.302946	0.405966	0.312029	0.309598	0.422744	0.205744	0.334225	0.399652	0.361728	0.395218
1328	A	0.258648	0.252774	0.241525	0.281858	0.232225	0.283043	0.350494	0.402469	0.352175	0.255599	0.36293	0.399221	0.262562	0.220426
1331	A	0.0891317	0.105554	0.123113	0.0986978	0.0902102	0.149286	0.140883	0.138034	0.12362	0.0923394	0.163559	0.0859476	0.170446	0.0740579
1336	A	0.0333778	0.0336361	0.041842	0.0434358	0.0579206	0.055049	0.0314936	0.0245128	0.0388949	0.034718	0.0340524	0.0438057	0.0607055	0.0333877
1337	A	0.0406465	0.0539447	0.0617803	0.0353876	0.0581226	0.10727	0.0380977	0.0368058	0.0401662	0.0451993	0.0409242	0.0459962	0.0891369	0.0452711
1339	A	0.0450354	0.0602235	0.069054	0.0595528	0.0802182	0.158111	0.0296083	0.0481431	0.0415287	0.0187177	0.0667011	0.0329781	0.0525041	0.0367996
1348	A	0.088718	0.114999	0.0805443	0.107443	0.0688137	0.125373	0.0830009	0.0993429	0.101487	0.0706257	0.126072	0.189747	0.186247	0.141839
1362	A	0.123675	0.098783	0.085197	0.177651	0.143377	0.169361	0.109333	0.107356	0.0680972	0.137465	0.146931	0.112696	0.210383	0.0971769
1365	A	0.0536907	0.0332269	0.0402447	0.0557271	0.081756	0.110403	0.0464041	0.0498908	0.0475301	0.056629	0.055807	0.0398629	0.0738518	0.0396717
1366	A	0.0654165	0.0699249	0.0341085	0.0786837	0.0395081	0.0871177	0.0353324	0.036037	0.0582589	0.0507906	0.0485751	0.0499449	0.125407	0.04403
1367	A	0.121848	0.11104	0.0773457	0.174148	0.12193	0.179683	0.0946525	0.0914014	0.12889	0.0539193	0.0877281	0.133321	0.162425	0.101023
1381	A	0.0377754	0.0461842	0.044327	0.0667949	0.0422449	0.0348136	0.0477526	0.0539653	0.0462977	0.0647662	0.0415264	0.0616376	0.0900764	0.0460331
1382	A	0.0598239	0.0761337	0.0689436	0.0706386	0.0861906	0.0732205	0.0334321	0.0226992	0.0279292	0.0185435	0.0237156	0.0395101	0.153055	0.0248645
1385	A	0.0452261	0.0389026	0.0329941	0.0475125	0.0370882	0.0625557	0.0258623	0.0375948	0.0292842	0.0278967	0.0374229	0.0312283	0.0720109	0.0157223
1386	A	0.0418641	0.0420083	0.0191058	0.0632924	0.0247566	0.0455918	0.0448608	0.0373604	0.0414653	0.0281425	0.0395768	0.0286417	0.0626421	0.0188657
1391	A	0.040851	0.0428462	0.091211	0.0874806	0.046747	0.0408648	0.101212	0.0804499	0.0851015	0.0757362	0.0607656	0.0746203	0.0678868	0.0776856
1392	A	0.0658728	0.0664904	0.037324	0.0540151	0.0567549	0.035756	0.0674647	0.0942356	0.0862807	0.0682727	0.0695295	0.119112	0.0922357	0.0992937
1414	A	0.0376128	0.0214878	0.0243542	0.0220246	0.0268615	0.034138	0.0520541	0.0748204	0.104095	0.0456918	0.0781912	0.0791766	0.03513	0.0561651
1421	A	0.0270748	0.0302028	0.0414231	0.0344359	0.0437645	0.054924	0.0483564	0.0672815	0.0633965	0.0424083	0.0635798	0.0512952	0.0975102	0.0567151
1427	A	0.0778107	0.11086	0.104566	0.0847712	0.064254	0.0653227	0.135682	0.0962434	0.125983	0.151032	0.099558	0.109748	0.134337	0.101666
1437	A	0.0402619	0.0514174	0.0688521	0.0939228	0.0341647	0.0955011	0.0330247	0.0252	0.0280508	0.0215577	0.0422611	0.0432415	0.135548	0.0229064
1446	A	0.0366505	0.0339957	0.0716521	0.0381898	0.055683	0.0485771	0.0697614	0.0584178	0.0990514	0.0567859	0.0690369	0.0720897	0.0594226	0.071782
1453	A	0.0382142	0.0406385	0.0422096	0.0342625	0.042008	0.0471796	0.0485248	0.0593407	0.0534469	0.0532048	0.0322621	0.0523363	0.0927585	0.0489237
1456	A	0.0470736	0.0397127	0.0315147	0.0590618	0.0522419	0.039604	0.0557659	0.103195	0.0929562	0.0904108	0.0701035	0.0873108	0.0795047	0.0879673
1485	A	0.101285	0.089009	0.11451	0.133969	0.100664	0.16693	0.107051	0.0926107	0.169381	0.0729489	0.104704	0.120474	0.167949	0.0918314
1491	A	0.0918428	0.0908279	0.0559264	0.141658	0.100006	0.110986	0.10148	0.116164	0.165065	0.100031	0.14109	0.116565	0.120977	0.0785073
1494	A	0.213731	0.229018	0.0961409	0.253025	0.211586	0.220801	0.162667	0.17318	0.180401	0.117098	0.172571	0.148134	0.193238	0.167237
1497	A	0.151806	0.120952	0.0853732	0.248318	0.152801	0.165107	0.123721	0.164041	0.18653	0.144229	0.154766	0.178614	0.176597	0.160579
1502	A	0.0823212	0.090708	0.09017	0.11832	0.112051	0.162478	0.318775	0.356811	0.510424	0.329602	0.386067	0.375999	0.233553	0.358011
1509	A	0.0491967	0.0686272	0.0969697	0.0885272	0.0821211	0.0802379	0.0435126	0.0598328	0.0793525	0.0442231	0.0643026	0.0498305	0.0927676	0.0469175
1512	A	0.184118	0.18985	0.196662	0.219482	0.235474	0.212242	0.514704	0.615266	0.658977	0.470743	0.630117	0.593216	0.179324	0.478075
1517	A	0.327859	0.298364	0.234999	0.37831	0.386828	0.255597	0.599509	0.582017	0.608401	0.584531	0.60339	0.610017	0.296375	0.555136
1518	a	0.278088	0.245065	0.191873	0.325985	0.224083	0.259426	0.324596	0.312457	0.322449	0.289869	0.267195	0.369422	0.234481	0.301233
1519	A	0.052099	0.0544226	0.0583962	0.119479	0.0809957	0.10721	0.0412631	0.0317871	0.0554933	0.0390215	0.0366641	0.0293394	0.128451	0.0416258
1521	A	0.064569	0.0847035	0.0498119	0.108283	0.0793493	0.0899266	0.0607397	0.0634844	0.0828729	0.0538672	0.0885381	0.0311194	0.123552	0.0330745
1527	A	0.0361803	0.0380024	0.0524632	0.058911	0.0493497	0.0281732	0.388158	0.312804	0.405342	0.272874	0.305426	0.232161	0.0281226	0.176403
1528	a	0.0841623	0.0929524	0.0910607	0.084336	0.0785717	0.101338	0.200807	0.174373	0.225749	0.122329	0.205836	0.100917	0.0921883	0.0846305
1531	A	0.0319478	0.040465	0.0263776	0.067576	0.0441715	0.0440718	0.0584332	0.0658461	0.0470777	0.0546492	0.0616544	0.0349357	0.05237	0.0491998
1541	A	0.200933	0.195034	0.157205	0.286573	0.188797	0.217097	0.254606	0.27645	0.313547	0.190359	0.220458	0.198541	0.202719	0.167478
1547	A	0.0725771	0.0684049	0.0623571	0.0989572	0.0723451	0.10316	0.103231	0.131946	0.116629	0.0989863	0.106295	0.081922	0.11488	0.101486
1548	A	0.0412303	0.0639949	0.0396774	0.0786566	0.0653168	0.067504	0.0506236	0.0922637	0.0842193	0.0597577	0.0853052	0.0715717	0.0763169	0.0841455
1552	A	0.0342642	0.0225499	0.0230579	0.0293205	0.0303613	0.0497811	0.112678	0.110188	0.131911	0.099599	0.12983	0.15612	0.0462095	0.122632
1554	A	0.0176793	0.0190925	0.0158728	0.0309178	0.0284217	0.0368286	0.057243	0.0744212	0.0831683	0.0622996	0.0970629	0.0882382	0.0326766	0.0968367
1557	A	0.0122902	0.00937886	0.0123102	0.0140209	0.0234755	0.0223545	0.0304047	0.0123327	0.0169149	0.0111724	0.0218223	0.0171153	0.0198961	0.0167479
1558	A	0.00528202	0.0119645	0.00822986	0.0118948	0.00784639	0.0213389	0.00901378	0.00785405	0.00845881	0.00496894	0.00641807	0.00466686	0.026016	0.0106464
1559	A	0.0208209	0.014069	0.0137691	0.0188662	0.020665	0.0199174	0.0332409	0.0410317	0.0364596	0.0277197	0.0337544	0.0361863	0.0188822	0.0415628
1569	A	0.00887142	0.00856046	0.00886982	0.014467	0.0153845	0.0217195	0.013872	0.011785	0.0159257	0.0150297	0.0155616	0.0203335	0.0243677	0.0146487
1577	A	0.0277857	0.0340533	0.0314737	0.0431297	0.0371185	0.0505097	0.0932567	0.0958735	0.149667	0.0671241	0.0999256	0.100031	0.0612516	0.0926735
1587	A	0.0151062	0.0239497	0.00706957	0.0252121	0.0168135	0.0248661	0.110517	0.117454	0.130378	0.0604453	0.124605	0.0765675	0.0297631	0.0441574
1593	A	0.0154799	0.0195916	0.0100538	0.0221885	0.00817035	0.0197831	0.0962938	0.114525	0.118402	0.0700381	0.0954394	0.0981426	0.0356301	0.106811
1594	A	0.00894848	0.00954465	0.0147971	0.0159189	0.0155104	0.0201022	0.0465157	0.0595844	0.0562905	0.0224341	0.0526425	0.0680161	0.0339493	0.0565798
1595	A	0.01085	0.013762	0.011604	0.024347	0.0205784	0.0297239	0.0332602	0.0266951	0.0333462	0.0228702	0.0290052	0.0240931	0.0367453	0.0252076
1607	A	0.0212893	0.0236899	0.0214983	0.0155487	0.0105224	0.0232094	0.0308554	0.0461042	0.0524497	0.032999	0.040861	0.04616	0.0266766	0.0411607
1615	A	0.0440896	0.0339549	0.0284765	0.037322	0.0503134	0.040251	0.0944706	0.102103	0.120161	0.0613041	0.102774	0.0947962	0.0704722	0.0806427
1617	A	0.126561	0.150152	0.16479	0.143981	0.129687	0.0701763	0.260728	0.262085	0.24526	0.247433	0.264703	0.315966	0.10796	0.310137
1624	A	0.0814896	0.0651376	0.091977	0.140162	0.102894	0.104408	0.0968351	0.0934679	0.0985501	0.105242	0.0890401	0.112759	0.109311	0.094974
1625	A	0.0516478	0.0516885	0.0479244	0.112266	0.0769217	0.0677675	0.0506323	0.0484708	0.0600451	0.0370842	0.0384906	0.0488166	0.0862202	0.0428508
1626	A	0.0569395	0.0615664	0.0487838	0.0878657	0.0707727	0.0480538	0.0283086	0.0391222	0.0522822	0.0334705	0.0399005	0.0488709	0.100359	0.0214707
1628	A	0.0302626	0.0297936	0.0393301	0.0498068	0.0346425	0.0260429	0.0424647	0.0348997	0.0534736	0.0409251	0.0534957	0.0542377	0.0599811	0.0259489
1631	A	0.0254921	0.0385081	0.0255359	0.0317811	0.0264205	0.0244817	0.135899	0.160515	0.184114	0.0765548	0.111684	0.115209	0.0522187	0.093898
1632	A	0.0264015	0.0242985	0.0193972	0.0110247	0.0279408	0.03435	0.111841	0.101393	0.121476	0.0646972	0.087028	0.0478691	0.031746	0.0509862
1636	A	0.0198862	0.0143885	0.0143227	0.0207679	0.0226812	0.024165	0.109887	0.107979	0.142493	0.0928664	0.0896723	0.0541215	0.0182306	0.0487329
1637	A	0.0261817	0.0330406	0.0308921	0.0303252	0.021961	0.0352382	0.247652	0.268332	0.294235	0.219141	0.229672	0.149741	0.0323099	0.125859
1640	A	0.0155807	0.0175023	0.0111074	0.0184507	0.0120268	0.0294417	0.0542452	0.0780735	0.0659035	0.0467013	0.0444604	0.020786	0.0508572	0.0247262
1644	A	0.00637285	0.0117126	0.00760945	0.0143858	0.0111252	0.0194637	0.0119566	0.0172599	0.0149045	0.00528368	0.0194199	0.0133567	0.0264354	0.00965065
1647	A	0.0074963	0.00728607	0.00978976	0.0086887	0.0161872	0.0145452	0.0194753	0.0437484	0.094821	0.0207422	0.0471481	0.0233046	0.0173357	0.0232259
1662	A	0.0215235	0.0218194	0.0251897	0.0417098	0.023486	0.039318	0.137208	0.114915	0.121976	0.0778485	0.0846474	0.0684847	0.0585186	0.0612498
1663	A	0.0221686	0.0200759	0.025231	0.0377653	0.0319349	0.0272536	0.174988	0.180498	0.18314	0.120878	0.163506	0.113554	0.0509624	0.0962314
1673	A	0.0174341	0.011343	0.0174922	0.0203563	0.0120165	0.019978	0.0450442	0.0742339	0.0565151	0.0441415	0.0522553	0.052234	0.0340614	0.0373432
1676	A	0.0170214	0.00966873	0.0100461	0.0140293	0.00696397	0.0201915	0.0246984	0.0314351	0.0257395	0.0173886	0.0110552	0.0117833	0.022057	0.0189626
1678	A	0.0164175	0.0223854	0.0201329	0.0190031	0.0174374	0.0210645	0.0179506	0.0185491	0.0374565	0.0193209	0.0208828	0.00780914	0.0250355	0.0288934
1693	A	0.0942799	0.12678	0.119827	0.145199	0.140069	0.125117	0.155642	0.177899	0.229955	0.131512	0.184117	0.231599	0.190756	0.125775
1695	A	0.15951	0.178507	0.16674	0.234639	0.196781	0.246983	0.165832	0.2051	0.237519	0.195021	0.168515	0.191511	0.218947	0.170052
1700	A	0.802519	0.758308	0.793419	0.967084	0.877076	1.10963	0.635792	0.671495	0.630128	0.497958	0.560055	0.482308	1.30318	0.333338
1704	A	0.77293	0.689869	0.62915	1.0258	0.863698	1.25923	0.527647	0.552286	0.725209	0.437261	0.493547	0.554824	1.72015	0.399634
1713	A	0.609737	0.531805	0.56229	0.903666	0.646254	0.893151	0.118069	0.138868	0.179139	0.107687	0.122215	0.14303	1.26668	0.133686
1717	A	0.251093	0.230012	0.199114	0.339847	0.285075	0.287477	0.0447327	0.0692631	0.0512351	0.0331099	0.0585249	0.0799231	0.380687	0.0421601
1723	A	0.231388	0.198645	0.221752	0.306407	0.276562	0.306794	0.0116398	0.0200345	0.0500768	0.0165904	0.0249813	0.0339501	0.390733	0.0146425
1730	A	0.157136	0.171409	0.156288	0.206274	0.151271	0.125067	0.215639	0.228796	0.218575	0.191265	0.225035	0.150571	0.192155	0.111044
1731	A	0.184761	0.183605	0.197315	0.286993	0.253339	0.199043	0.0300792	0.0477531	0.0379483	0.0398773	0.0447544	0.052376	0.468264	0.0383775
1732	A	0.0727665	0.0581557	0.0582377	0.119586	0.0944488	0.161501	0.0132254	0.030128	0.0240054	0.0192289	0.024508	0.00638794	0.214816	0.0178431
1736	A	0.0750706	0.0903159	0.0684747	0.120127	0.0721564	0.0794358	0.265193	0.28489	0.242316	0.175089	0.212743	0.188777	0.124504	0.212138
1737	A	0.0577045	0.0699665	0.0643734	0.11435	0.0721868	0.127947	0.24884	0.266798	0.294332	0.237726	0.254995	0.232046	0.176452	0.204076
1740	A	0.0628294	0.0586415	0.0547625	0.101984	0.0460918	0.0767848	0.00925605	0.0157959	0.0108721	0.0130916	0.0154542	0.0170757	0.160667	0.0113045
1743	A	0.0766884	0.0548104	0.0479329	0.106489	0.0718301	0.120315	0.0341578	0.0406194	0.0661651	0.0264708	0.0512295	0.040817	0.223589	0.0514381
1745	A	0.0664727	0.064321	0.053749	0.159897	0.0629838	0.0993895	0.0429359	0.0425098	0.0545243	0.0352278	0.0508798	0.0439809	0.178803	0.0200094
1759	A	0.0681421	0.07697	0.091327	0.0968194	0.0550364	0.0796933	0.181027	0.176876	0.188962	0.150529	0.134564	0.130819	0.132427	0.121438
1760	A	0.0375686	0.0337201	0.0406698	0.0536433	0.0327505	0.0568455	0.125828	0.147105	0.131379	0.111288	0.112034	0.118796	0.0791665	0.0971409
1761	A	0.0483312	0.059456	0.0496747	0.123326	0.0502605	0.0654956	0.0705132	0.0863528	0.0813431	0.0530687	0.0794955	0.0880319	0.0984439	0.0628225
1764	A	0.0179389	0.0171584	0.016804	0.0230707	0.0182501	0.023081	0.0527777	0.0504861	0.083167	0.0313596	0.0423771	0.0428231	0.036422	0.0353567
1769	A	0.0100355	0.00983314	0.00758975	0.0202174	0.0140459	0.0335987	0.113387	0.124039	0.178754	0.100435	0.0801417	0.066328	0.0292497	0.0966184
1770	A	0.0125637	0.0166605	0.0118014	0.0224843	0.0131256	0.0225052	0.110317	0.156327	0.180038	0.0968711	0.0992439	0.0940265	0.0253616	0.128474
1774	A	0.0107864	0.00968826	0.000823282	0.0111015	0.00185825	0.00935804	0.0437695	0.0546285	0.045545	0.0447704	0.0555326	0.0513571	0.0156221	0.0620276
1780	A	0.00468147	0.00969442	0.0044838	0.00830298	0.00342703	0.00805463	0.0727428	0.0651112	0.0765884	0.0525578	0.0518935	0.0413291	0.0182874	0.0597683
1781	A	0.00234009	0.0048455	0.00522911	0.00518844	0.00513861	0.00447423	0.0299024	0.0216607	0.029772	0.0175001	0.0246618	0.0398166	0.0102407	0.0164977
1782	A	0.0148199	0.00968986	0.0201651	0.0290589	0.0154152	0.050119	0.00854993	0.0130066	0.0117126	0.0163441	0.0160474	0.028845	0.0643764	0.0165092
1787	A	0.015815	0.00906713	0.00902534	0.0241338	0.00864409	0.0195573	0.0135918	0.0149401	0.0317511	0.0169904	0.0214157	0.0187156	0.0267968	0.033079
1788	A	0.00876787	0.0140598	0.00910505	0.0222192	0.0104703	0.015174	0.0272289	0.0229683	0.0278982	0.0308307	0.0226007	0.0362237	0.0283552	0.0239625
1789	A	0.029335	0.0294062	0.0279754	0.0389687	0.0199866	0.0275901	0.0878332	0.132432	0.180523	0.0752084	0.163277	0.13259	0.0520863	0.0897434
1795	A	0.00742654	0.00955159	0.00880183	0.0175218	0.00831878	0.0099956	0.108629	0.121337	0.160834	0.0790324	0.0935424	0.0782932	0.0175391	0.111653
1796	A	0.010022	0.00520915	0.0072959	0.0155039	0.00844127	0.00839058	0.0199686	0.0287072	0.0294302	0.0260829	0.0452056	0.0392478	0.0257086	0.0162101
1798	A	0.00512208	0.00837228	0.00249203	0.00452909	0.00385238	0.00870786	0.0109253	0.0129933	0.011977	0.0111033	0.0189787	0.0196128	0.00764955	0.0108295
1799	A	0.0110817	0.0136792	0.00497591	0.0135694	0.00865127	0.0184294	0.0385439	0.0565993	0.132923	0.0437763	0.0746338	0.147379	0.0220111	0.132044
1819	A	0.0372413	0.0308583	0.0339597	0.0640459	0.0338873	0.0344636	0.0474097	0.0577275	0.0945758	0.0622081	0.0681125	0.0785664	0.059845	0.0958812
1831	A	0.0351874	0.0464321	0.0254821	0.0537267	0.0302188	0.0631569	0.0237666	0.0206265	0.0179616	0.0128612	0.0164492	0.0220868	0.0695019	0.00425351
1832	A	0.0580215	0.0568863	0.0437039	0.068444	0.0396474	0.0452277	0.0228448	0.0477971	0.0406819	0.0552879	0.0381019	0.0364875	0.0823075	0.0287917
1837	A	0.0496886	0.0416272	0.0572684	0.0503987	0.0440723	0.070372	0.102867	0.110339	0.145334	0.122093	0.115669	0.104461	0.0764814	0.110557
1844	A	0.0730977	0.0801244	0.07955	0.0907106	0.106627	0.105457	0.12302	0.107616	0.165507	0.120803	0.0912836	0.123794	0.183892	0.14536
1852	A	0.0889461	0.0812201	0.0741676	0.0750165	0.0704094	0.0830458	0.22498	0.216231	0.206937	0.190535	0.172265	0.184784	0.0919017	0.135635
1861	A	0.0385612	0.0559119	0.0586895	0.0506687	0.0576636	0.0320529	0.0516157	0.0707007	0.095482	0.0255837	0.0759075	0.0293631	0.0316912	0.0437123
1862	A	0.215455	0.237522	0.339294	0.182601	0.298396	0.103821	0.118294	0.156623	0.190802	0.106517	0.125542	0.061562	0.149725	0.0473218
1865	a	0.0268584	0.0301466	0.0347098	0.0318882	0.0391636	0.0390867	0.209779	0.217432	0.26535	0.19591	0.190331	0.170474	0.0447501	0.142518
1867	A	0.13944	0.1569	0.137508	0.112903	0.1586	0.097077	0.209422	0.261407	0.279631	0.136463	0.192047	0.154921	0.11868	0.146275
1868	A	0.131899	0.12357	0.108688	0.103505	0.100982	0.0398963	0.107515	0.111462	0.115468	0.0864418	0.0977314	0.0415137	0.08603	0.0533658
1882	A	0.014102	0.0204791	0.0108949	0.019755	0.0183276	0.0219633	0.0646269	0.0660583	0.0615227	0.049447	0.0489743	0.0458674	0.0238138	0.0369442
1885	A	0.0141405	0.0173611	0.0134351	0.0253494	0.0154642	0.0149713	0.0576384	0.0506651	0.0636596	0.0407425	0.051904	0.0343848	0.0214133	0.0282458
1886	A	0.0307974	0.0243646	0.0292774	0.0329294	0.0269526	0.0258918	0.0559846	0.067208	0.0681948	0.0383149	0.0469464	0.0471931	0.0526117	0.0280094
1890	A	0.0817873	0.0798581	0.0926473	0.0928295	0.101316	0.0943626	0.282248	0.316557	0.248973	0.358078	0.280866	0.237547	0.11771	0.174221
1891	A	0.293369	0.314795	0.347571	0.320391	0.302693	0.378451	0.424604	0.447348	0.374475	0.419115	0.4324	0.406262	0.42839	0.292264
1901	A	0.0136786	0.0170862	0.0182701	0.030805	0.0209621	0.0167236	0.0392157	0.0331257	0.042701	0.0447939	0.0326371	0.0475629	0.0379467	0.0354074
1902	A	0.048241	0.0340928	0.0460213	0.0535125	0.0527978	0.0470269	0.0884403	0.0937947	0.180755	0.0627404	0.0793112	0.0918546	0.0655528	0.082072
1911	A	0.0565546	0.0606833	0.0563951	0.0922841	0.0742917	0.11263	0.136089	0.109802	0.151951	0.123439	0.138371	0.161259	0.131237	0.172055
1917	A	0.098546	0.0992325	0.159611	0.131347	0.165804	0.180333	0.203998	0.221403	0.222052	0.177759	0.220347	0.184416	0.212114	0.160804
1923	A	0.0644718	0.0627574	0.0536986	0.111415	0.115902	0.12904	0.0811396	0.0626995	0.0541687	0.0548785	0.0603142	0.0598499	0.234969	0.0570561
1926	A	0.0768393	0.0812433	0.0702155	0.109111	0.10973	0.1646	0.11037	0.112415	0.115434	0.0852955	0.136008	0.133443	0.196383	0.125394
1928	A	0.0386809	0.0507562	0.0591257	0.100822	0.0874085	0.155159	0.140175	0.128606	0.139538	0.070585	0.103064	0.1133	0.190282	0.111395
1933	A	0.271492	0.374101	0.466824	0.279817	0.32564	0.441977	0.427614	0.448012	0.438743	0.34359	0.428217	0.473151	0.347217	0.370446
1935	A	0.154105	0.235442	0.283965	0.218703	0.24014	0.32689	0.04618	0.0365459	0.0532678	0.0658265	0.0576265	0.074845	0.386946	0.0636956
1936	A	0.12662	0.14419	0.186106	0.170512	0.212899	0.211733	0.0156629	0.0318036	0.0286381	0.023313	0.0360771	0.0455581	0.244694	0.0360441
1937	A	0.121681	0.159739	0.200321	0.204463	0.237781	0.317561	0.0445865	0.0575358	0.0671074	0.0523784	0.0602841	0.0728135	0.410909	0.0649496
1938	A	0.192294	0.130518	0.168477	0.192081	0.20475	0.265044	0.0904016	0.091823	0.085867	0.0750059	0.0958685	0.099688	0.295678	0.0851272
1950	A	0.0952929	0.0824314	0.0583393	0.0938587	0.0612413	0.062024	0.0616038	0.0725587	0.0502905	0.0478463	0.0692903	0.0438758	0.101696	0.0191909
1952	A	0.0332717	0.0498422	0.0485287	0.0918013	0.0507038	0.0882829	0.0545411	0.0678117	0.0517202	0.0504336	0.0908385	0.0489469	0.0957625	0.0260061
1954	A	0.0385455	0.0566697	0.0364643	0.0607837	0.0405032	0.0696379	0.0572923	0.0527832	0.0615379	0.0329156	0.0588913	0.0679485	0.0774708	0.0274288
1956	A	0.0773507	0.0840727	0.0874599	0.0937666	0.0910343	0.090638	0.157021	0.18272	0.14979	0.129235	0.205911	0.126102	0.0898634	0.089783
1958	A	0.180619	0.150208	0.170505	0.155715	0.145964	0.154852	0.17956	0.170475	0.21303	0.141605	0.214474	0.204714	0.238351	0.140397
1961	A	0.232949	0.259817	0.262838	0.29522	0.219102	0.348511	0.203858	0.203506	0.207342	0.173366	0.239604	0.253479	0.423841	0.208714
1964	A	0.369066	0.409388	0.267552	0.403387	0.375011	0.246389	0.186439	0.225695	0.173987	0.181894	0.196629	0.187905	0.290324	0.143564
1973	A	0.112341	0.117064	0.105557	0.149421	0.148925	0.193302	0.218099	0.243194	0.244401	0.18739	0.268814	0.406551	0.239363	0.247756
1977	A	0.0595086	0.0430257	0.0415376	0.0509009	0.05755	0.0654139	0.0605986	0.0538648	0.0754336	0.0439942	0.0515503	0.0399642	0.0881543	0.0347431
1978	A	0.0597372	0.0780588	0.0815831	0.0941909	0.0695742	0.06953	0.103	0.122594	0.174195	0.0838457	0.103141	0.091824	0.0801947	0.0481492
1984	A	0.289598	0.252114	0.225071	0.328859	0.254757	0.189098	0.302795	0.296749	0.241158	0.298755	0.272634	0.271241	0.187886	0.23453
1985	A	0.130876	0.115184	0.0867731	0.0973903	0.0825863	0.0813909	0.154311	0.162604	0.137158	0.163234	0.158999	0.126295	0.0920331	0.0861439
1992	A	0.0398153	0.0608046	0.0482972	0.0791139	0.0619896	0.0920186	0.107254	0.104289	0.085517	0.0934618	0.0842435	0.128061	0.0690186	0.0603759
1993	A	0.0361315	0.0399217	0.0236255	0.0357863	0.0421191	0.0357247	0.0308734	0.0265041	0.0324181	0.0136901	0.0355933	0.046697	0.0364818	0.0355635
1996	A	0.0252673	0.0270809	0.0167948	0.0177459	0.0368285	0.0452021	0.0406219	0.0350225	0.0463276	0.0331381	0.0422223	0.0359012	0.0297449	0.0362993
2003	A	0.0112906	0.0162791	0.0234175	0.0260213	0.0187788	0.0418635	0.0146461	0.0252374	0.0256587	0.0239282	0.0300242	0.0246914	0.0281039	0.0166559
2004	A	0.023823	0.0244135	0.0221891	0.0306199	0.0288963	0.0254426	0.0335501	0.0420426	0.0398794	0.0348887	0.0261575	0.0343171	0.0292328	0.0312191
2006	A	0.0220401	0.0168549	0.0141388	0.0254239	0.0225239	0.0330381	0.0391825	0.0489874	0.0729405	0.0431606	0.0576585	0.0378691	0.0333119	0.025895
2007	A	0.0170106	0.0133635	0.00910131	0.0208993	0.0212705	0.0411093	0.0411589	0.0360262	0.0424656	0.0351705	0.0427129	0.0189758	0.0334722	0.0172913
2011	A	0.0215332	0.0222299	0.0155801	0.0221638	0.0389294	0.0372923	0.0573851	0.0506338	0.0649255	0.0555881	0.0458514	0.0569011	0.0579355	0.0575729
2019	A	0.0276545	0.0432455	0.0408002	0.0545248	0.0578076	0.0665052	0.0654312	0.0647958	0.0753923	0.0537334	0.054128	0.0641621	0.0877067	0.0411527
2020	A	0.0512116	0.042905	0.049419	0.0602894	0.0645485	0.066124	0.0749002	0.0724408	0.0600089	0.0691431	0.0575787	0.0548177	0.108792	0.0261703
2023	A	0.025642	0.0237857	0.0287068	0.0317723	0.0192981	0.0538204	0.0393922	0.0455365	0.0450691	0.03816	0.0383098	0.0415223	0.0567649	0.0284232
2024	A	0.0244631	0.029829	0.0235685	0.0622317	0.0477377	0.0888991	0.0235146	0.0297802	0.0390437	0.0416219	0.0384368	0.0287453	0.0818006	0.0191436
2027	A	0.0120666	0.0248793	0.0314113	0.0382759	0.0372729	0.0405851	0.0302504	0.0664605	0.0494225	0.0501322	0.0502287	0.0687153	0.051036	0.0401817
2034	A	0.0310349	0.0187343	0.0370528	0.0333907	0.0549954	0.0662128	0.0583479	0.0637413	0.0610571	0.0452372	0.0407851	0.0704523	0.0901416	0.0457392
2035	A	0.0151126	0.0368502	0.0237849	0.0357034	0.0312042	0.0434428	0.0244315	0.0253736	0.0381409	0.0229538	0.0233081	0.0334836	0.0711799	0.0143268
2036	A	0.0120289	0.0321166	0.0150306	0.0331565	0.0520467	0.0546047	0.00553159	0.00368382	0.0129298	0.00969963	0.00895033	0.00941908	0.0573	0.0058979
2037	A	0.0171933	0.0257085	0.0189676	0.0246682	0.015205	0.0476563	0.0091712	0.00914319	0.0120634	0.0107421	0.0197377	0.0351354	0.0595676	0.016497
2041	A	0.0413891	0.0434578	0.0560301	0.0699642	0.0620694	0.093136	0.31035	0.329767	0.31969	0.254453	0.264625	0.216743	0.0719471	0.206001
2051	A	0.0476092	0.0473961	0.0477327	0.0616162	0.0520788	0.075499	0.0255187	0.0365233	0.0408266	0.027029	0.0389832	0.0380084	0.0734439	0.0306071
2063	A	0.0521025	0.0430761	0.0393508	0.0677037	0.0410248	0.104286	0.0830914	0.0758607	0.102776	0.0753162	0.0497913	0.0788422	0.110378	0.0880023
2065	A	0.108993	0.0977505	0.129964	0.101633	0.121021	0.0911148	0.0321261	0.053598	0.0481799	0.0414482	0.0255386	0.0359873	0.0943793	0.0426798
2082	A	0.0450362	0.0394032	0.0445335	0.0439633	0.0497477	0.0720991	0.0318192	0.053288	0.0607043	0.0254362	0.0421219	0.0689254	0.0556977	0.0389873
2087	A	0.0211442	0.0283635	0.0323252	0.0359435	0.0441359	0.0617453	0.0529352	0.0432205	0.0399736	0.0465199	0.0530978	0.0580975	0.0730994	0.0364307
2089	A	0.0477431	0.0613458	0.0645388	0.0657275	0.0760225	0.0847925	0.0905515	0.134284	0.166917	0.10697	0.103707	0.118421	0.078455	0.100573
2094	A	0.329078	0.333808	0.377619	0.3693	0.211355	0.370275	0.730033	0.828083	0.993072	0.619027	0.747054	0.693255	0.452544	0.572937
2099	A	0.174388	0.163813	0.145878	0.187346	0.143873	0.143291	0.255305	0.360646	0.356545	0.279789	0.297937	0.327402	0.194229	0.316395
2144	A	0.17245	0.164671	0.134922	0.216346	0.128254	0.171287	0.359565	0.439241	0.513496	0.349275	0.409345	0.4869	0.195194	0.448008
2203	A	3.03325	2.84533	2.4191	2.67346	2.3051	2.4061	4.62697	4.46888	3.89249	5.44296	4.30311	3.98578	2.31606	4.42183
2227	A	0.175741	0.17097	0.160371	0.276304	0.127549	0.12211	0.243643	0.229187	0.194327	0.247108	0.171114	0.18776	0.159722	0.189121
2249	A	0.143843	0.144831	0.12532	0.200473	0.108567	0.170435	0.0997242	0.0565374	0.0723203	0.0614534	0.054646	0.0936851	0.251177	0.0778746
2259	A	0.303423	0.279471	0.403475	0.285456	0.390646	0.495352	0.0790493	0.0884022	0.143804	0.0688806	0.0993523	0.130255	0.596421	0.0616499
2264	A	0.223664	0.251467	0.344975	0.331826	0.325011	0.416041	0.138149	0.140663	0.22196	0.0963825	0.147738	0.142632	0.449541	0.0954654
2272	A	0.538482	0.443693	0.308858	0.749379	0.299523	0.354696	0.12457	0.136006	0.220504	0.106383	0.17781	0.219001	0.546895	0.142691
2275	A	0.143814	0.17992	0.100731	0.251425	0.116742	0.216423	0.0527173	0.0540157	0.111873	0.0519219	0.0742121	0.113111	0.422943	0.0889883
2278	A	0.240575	0.386037	0.409915	0.3503	0.413702	0.395696	0.303741	0.309214	0.522947	0.221418	0.405387	0.295437	0.730808	0.320647
2281	A	0.447094	0.390906	0.535427	0.472782	0.502954	0.684155	0.750009	0.734348	1.04125	0.548507	0.893426	1.02066	0.948027	0.620151
2296	A	0.0683074	0.0780379	0.0597664	0.0831808	0.0656444	0.0588009	0.0530703	0.0727769	0.0723938	0.0971181	0.0743181	0.0595869	0.0608923	0.0671551
2303	A	0.0156223	0.0591169	0.01104	0.0502693	0.0417647	0.0460719	0.0270884	0.0320383	0.0504958	0.0237548	0.03878	0.0416803	0.0351221	0.0278389
2304	A	0.00874263	0.0390182	0.019972	0.0193199	0.0221078	0.0314955	0.0233447	0.0239188	0.0302544	0.0181167	0.0277277	0.0210761	0.0309945	0.0453001
2309	A	0.0588303	0.057241	0.0765713	0.0963303	0.0766871	0.0750214	0.279549	0.254193	0.270277	0.201036	0.255083	0.289948	0.0694415	0.244854
2328	A	0.056726	0.076118	0.0509197	0.178263	0.0440059	0.100283	0.154103	0.168329	0.229411	0.123362	0.135957	0.276825	0.14497	0.374611
2337	A	0.0515888	0.0635388	0.0353283	0.0737939	0.0384964	0.0449397	0.0380193	0.0588627	0.0672219	0.0566429	0.0596557	0.0296372	0.07153	0.0434508
2343	A	0.0431888	0.0359632	0.0433029	0.0555791	0.0296026	0.0847448	0.0564164	0.0973983	0.08874	0.0717819	0.0735879	0.0367701	0.0797754	0.0527059
2345	A	0.0319047	0.0160082	0.0174821	0.0236194	0.0195394	0.159925	0.0545365	0.0662843	0.103566	0.0529794	0.0473217	0.044657	0.123159	0.0361365
2356	A	0.0365248	0.0268504	0.0449077	0.0505161	0.0628592	0.0694904	0.0810519	0.0775986	0.0954925	0.0637523	0.0791089	0.0523013	0.0753826	0.0336462
2359	a	0.027829	0.0125652	0.0278312	0.023796	0.0369705	0.027213	0.0574519	0.0543747	0.0692141	0.038258	0.0704247	0.0412936	0.026382	0.0167583
2362	A	0.0350665	0.0322944	0.0394692	0.0504087	0.0624117	0.0509493	0.108739	0.124561	0.132752	0.077923	0.12575	0.105121	0.0339655	0.0586111
2363	A	0.0166855	0.0148691	0.0246124	0.0144245	0.0295491	0.0479521	0.057347	0.0377656	0.0688382	0.0283807	0.0612327	0.0144067	0.0321611	0.0273187
2364	A	0.0219601	0.0227491	0.0299795	0.0372681	0.0295753	0.0479686	0.0253886	0.0226831	0.0295314	0.0227505	0.0251053	0.0128189	0.0367559	0.0150283
2366	A	0.00619765	0.00970232	0.00432362	0.00846842	0.0142806	0.0219131	0.0251862	0.0289554	0.0163072	0.00904998	0.00832917	0.00628249	0.0331831	0.00799169
2370	A	0.0123832	0.0158664	0.0129734	0.00843597	0.0225303	0.0324448	0.0232465	0.0259336	0.0379875	0.0262436	0.0336338	0.00766636	0.0334588	0.0103709
2371	A	0.0204883	0.0168835	0.014198	0.0182298	0.0179467	0.0506206	0.0180075	0.0228702	0.0307083	0.0175797	0.0270278	0.0154264	0.0364748	0.0104302
2372	A	0.0454125	0.0514855	0.0512647	0.0425537	0.0586131	0.0694766	0.0666836	0.0789397	0.105787	0.0494946	0.0608495	0.037033	0.0801573	0.0325673
2375	A	0.00889245	0.0115329	0.0131178	0.0243905	0.0108224	0.0257638	0.0693056	0.0848354	0.0811688	0.0412581	0.0461066	0.0597836	0.0264615	0.0493042
2377	A	0.0742673	0.104798	0.127803	0.0870127	0.111299	0.213438	0.296708	0.265394	0.279717	0.223486	0.24605	0.281344	0.192652	0.231674
2378	A	0.0227801	0.0181909	0.0181075	0.0262549	0.0386934	0.0512409	0.0273342	0.0344954	0.0364377	0.0376735	0.0373227	0.0498186	0.0624774	0.0292193
2384	A	0.0496363	0.0486242	0.0389905	0.0679579	0.0584681	0.0617064	0.0300849	0.0416506	0.0310263	0.0419648	0.0316552	0.0326016	0.0943	0.0125848
2385	A	0.118109	0.103508	0.120007	0.15123	0.164702	0.127877	0.0908388	0.0953209	0.119411	0.058957	0.0803914	0.0717226	0.170012	0.0732925
2391	A	0.433938	0.396149	0.448455	0.447866	0.499849	0.734479	0.33094	0.281884	0.259611	0.253393	0.289164	0.301814	0.609833	0.246081
2392	A	0.186503	0.207183	0.212347	0.218459	0.206754	0.345718	0.157824	0.15146	0.165605	0.117536	0.134881	0.195129	0.510636	0.1367
2397	a	0.0978968	0.127217	0.167588	0.123634	0.142616	0.251625	0.243107	0.26377	0.247488	0.255403	0.264359	0.278847	0.311882	0.200863
2399	A	0.231016	0.227565	0.268365	0.22331	0.286356	0.402373	0.135187	0.16724	0.207373	0.146736	0.167079	0.143357	0.596515	0.122053
2400	A	0.532877	0.498163	0.696004	0.490814	0.625887	0.860097	0.0836014	0.105347	0.102825	0.0949158	0.109375	0.0762544	0.870318	0.0646973
2408	A	0.0570224	0.055433	0.0710458	0.0546106	0.10131	0.104754	0.0136348	0.0111316	0.016981	0.0106302	0.0164018	0.00182832	0.123523	0.013281
2413	A	0.0100397	0.00863018	0.014654	0.00144292	0.012181	0.0155205	0.0158866	0.018418	0.0157938	0.00785032	0.0274393	0.0105656	0.0225262	0.018533
2414	A	0.0328809	0.0175861	0.0216999	0.0220138	0.0355646	0.0259997	0.0448934	0.0326855	0.0548649	0.0280034	0.0543514	0.0195855	0.0466095	0.0158214
2416	A	0.0266766	0.0298572	0.0422198	0.0248701	0.0241162	0.0396869	0.0444719	0.0412722	0.0822153	0.0384636	0.0555801	0.051549	0.0376652	0.0235083
2419	A	0.0256659	0.0312894	0.028517	0.0330797	0.0470831	0.0644434	0.117709	0.123678	0.157323	0.09546	0.107008	0.0743292	0.0582262	0.0721397
2424	A	0.0167731	0.0233978	0.0370279	0.0339067	0.045158	0.0516992	0.0179046	0.0221291	0.0579202	0.014173	0.0304433	0.0278087	0.0692142	0.0322138
2425	A	0.0226325	0.0313767	0.0380756	0.033685	0.0247529	0.078658	0.022171	0.0422767	0.0753246	0.0250223	0.0502947	0.0656849	0.0855772	0.0538621
2427	A	0.0946746	0.113231	0.0981658	0.152103	0.126103	0.134702	0.18654	0.214019	0.241027	0.135384	0.193015	0.194503	0.257631	0.133626
2434	A	0.107429	0.127258	0.0838727	0.160245	0.107047	0.169079	0.128868	0.140923	0.144234	0.129884	0.168537	0.136528	0.135263	0.0961123
2445	A	0.111518	0.133073	0.124639	0.219042	0.131892	0.112412	0.0644538	0.0576398	0.0784617	0.0580736	0.0932012	0.095684	0.128875	0.0470153
2447	A	0.0460685	0.0513621	0.0675916	0.0717074	0.060682	0.0924752	0.0457977	0.0415056	0.0516581	0.0494218	0.0581395	0.0659196	0.0968627	0.0748245
2449	A	0.09254	0.117244	0.110268	0.133198	0.142787	0.1244	0.0761355	0.106649	0.0907876	0.0821448	0.0800507	0.10605	0.19107	0.0885434
2456	A	0.176877	0.158703	0.111241	0.182965	0.131469	0.188975	0.094319	0.109645	0.10455	0.127701	0.0906526	0.0927352	0.177843	0.0906947
2468	A	0.042218	0.0475605	0.0376755	0.0661813	0.0182164	0.0741444	0.0260364	0.042558	0.0355351	0.036929	0.0512106	0.0671356	0.0808146	0.0664652
2469	A	0.0525562	0.0593441	0.0299067	0.0804304	0.026191	0.0972282	0.0556875	0.0955228	0.0913405	0.0524263	0.064282	0.123448	0.0804464	0.0820831
2473	A	0.0481962	0.0417826	0.0331211	0.05113	0.0264963	0.0748743	0.0372244	0.025839	0.0485628	0.0357068	0.0275938	0.0286508	0.0670136	0.0358233
2480	A	0.0568236	0.0785282	0.0970143	0.0693604	0.0726449	0.097735	0.0660474	0.0610608	0.0617981	0.0609706	0.0612849	0.0443882	0.135128	0.038592
2503	A	0.0244298	0.0181766	0.0255179	0.0399351	0.0299028	0.0425029	0.0414541	0.0383716	0.0494968	0.0320025	0.0350437	0.0526047	0.0914085	0.0465233
2507	A	0.0187847	0.0311151	0.0236756	0.038018	0.0185814	0.0415277	0.0696668	0.0695609	0.0900461	0.0607714	0.0768957	0.0417362	0.0647314	0.0310324
2508	A	0.0306657	0.0398903	0.0402653	0.0367904	0.0305526	0.0495673	0.0570572	0.0692828	0.0864949	0.0531212	0.0652492	0.0594248	0.0656461	0.0754316
2509	A	0.408111	0.445296	0.451943	0.449581	0.570297	0.464576	0.078473	0.0841732	0.111178	0.0720303	0.0813909	0.0570309	0.437303	0.0742318
2513	A	0.133903	0.131477	0.138043	0.185015	0.127862	0.161001	0.409652	0.468013	0.441947	0.354771	0.374538	0.454614	0.201056	0.356536
2523	A	0.0418698	0.0371575	0.030756	0.0597214	0.0510688	0.0413067	0.0452322	0.0407456	0.0353871	0.0310965	0.0349618	0.0776459	0.0687074	0.0564662
2525	A	0.0258335	0.0360818	0.0324284	0.0246996	0.0423955	0.0363465	0.0411371	0.0320574	0.0355925	0.0376258	0.0204907	0.0340272	0.0417313	0.0326888
2532	A	0.0430287	0.0398611	0.0743749	0.0540961	0.0367152	0.0585238	0.0524304	0.0758443	0.0519986	0.0511105	0.0432651	0.0614074	0.0295993	0.0346386
2533	A	0.0313075	0.0218627	0.0461557	0.0304234	0.0314295	0.0342689	0.0685655	0.0625853	0.0768527	0.0569853	0.0519174	0.129452	0.0599751	0.0688124
2539	A	0.0185188	0.0375589	0.0474278	0.0357477	0.0520102	0.0667229	0.102852	0.0911304	0.0685347	0.048736	0.0961033	0.140045	0.0733264	0.111207
2547	A	0.296219	0.234993	0.211978	0.360295	0.253962	0.199917	0.27153	0.280197	0.249474	0.218608	0.234074	0.181899	0.217019	0.192613
2549	A	0.0281935	0.0526941	0.0424706	0.0611957	0.0414244	0.0645364	0.0287853	0.0431865	0.0518555	0.0345208	0.0397006	0.0417989	0.0941458	0.0417587
2561	A	0.020998	0.0154738	0.0259637	0.0147998	0.0198632	0.0346724	0.0448312	0.0544818	0.0455608	0.0416142	0.0572323	0.071101	0.038357	0.0501646
2569	A	0.00948398	0.00768246	0.0128829	0.00734619	0.0109003	0.00586366	0.0120889	0.0178802	0.0217892	0.0129852	0.0118353	0.0119449	0.018524	0.0084357
2577	A	0.0290363	0.0202126	0.0237582	0.0276695	0.0266846	0.0241846	0.0394477	0.0275681	0.0458005	0.0228945	0.0343757	0.0275377	0.0322639	0.0190514
2578	A	0.0355612	0.0336494	0.0374474	0.0384435	0.0319748	0.0345228	0.0553996	0.0636906	0.0643075	0.0500964	0.0414928	0.0407312	0.0446281	0.0317303
2583	A	0.0731463	0.0611287	0.0749344	0.0903081	0.0800148	0.0596719	0.124599	0.137368	0.152545	0.132403	0.128634	0.110024	0.0855495	0.0889246
2587	A	0.0258084	0.0317748	0.0266639	0.0243608	0.0226523	0.0314933	0.0573108	0.0416335	0.0472533	0.0320311	0.0517801	0.0407826	0.0518131	0.0400218
2594	A	0.048976	0.0492551	0.0752753	0.062059	0.0566975	0.0626508	0.0972132	0.098647	0.0967249	0.0669688	0.0830405	0.0858442	0.0635566	0.0554708
2596	A	0.0246632	0.0264456	0.026964	0.0294582	0.022195	0.0379786	0.0137174	0.0159789	0.0224019	0.0171863	0.0248127	0.0174474	0.0533207	0.0120819
2597	A	0.067517	0.0553093	0.0677922	0.0870742	0.0686009	0.0983238	0.047903	0.0448305	0.0697642	0.0240121	0.0619019	0.0671658	0.104758	0.0416356
2607	A	0.222225	0.243287	0.216189	0.257074	0.223813	0.2428	0.216383	0.200348	0.277717	0.210263	0.232897	0.234404	0.40401	0.166954
2617	A	0.0941511	0.125195	0.109817	0.15313	0.122009	0.145578	0.204362	0.257579	0.236864	0.191233	0.175514	0.232406	0.220846	0.20337
2619	A	0.0764085	0.0824795	0.131702	0.118066	0.0913471	0.171585	0.305964	0.334327	0.325562	0.242906	0.215082	0.319772	0.186241	0.290302
2637	A	0.134492	0.121519	0.107152	0.114565	0.110107	0.102454	0.148057	0.182786	0.201088	0.131459	0.173475	0.0849693	0.0917061	0.100675
2638	A	0.156655	0.15936	0.197164	0.188933	0.185819	0.142561	0.200128	0.297839	0.242722	0.174327	0.234286	0.145237	0.146875	0.141093
2643	A	0.212839	0.200476	0.193724	0.232067	0.215016	0.214914	0.297149	0.356886	0.38517	0.25148	0.249351	0.229238	0.25778	0.267989
2655	A	0.013373	0.015836	0.0125083	0.0349104	0.0181204	0.0316212	0.0341616	0.0449472	0.0448471	0.0314944	0.0258875	0.0430152	0.0666395	0.0520387
2656	A	0.0290645	0.0338028	0.027413	0.0393058	0.042551	0.0527194	0.0252405	0.0344518	0.0333209	0.0454712	0.0276133	0.037826	0.093719	0.0386178
2670	A	0.0113071	0.0257904	0.01537	0.0505401	0.0288133	0.0342262	0.0561209	0.0522217	0.0896634	0.0402119	0.053535	0.0996625	0.0481803	0.0635016
2672	A	0.0407575	0.0343612	0.0389706	0.0531933	0.0553992	0.0612487	0.0874314	0.101194	0.148492	0.0639001	0.0850002	0.167348	0.0597832	0.113292
2674	A	0.0720911	0.0571919	0.0792359	0.0841884	0.0918738	0.092884	0.226816	0.246226	0.331456	0.175648	0.239423	0.356262	0.125133	0.291658
2691	A	0.0133631	0.0115672	0.0128972	0.0270351	0.0229572	0.0165918	0.0179615	0.0421591	0.0397055	0.0243795	0.0309789	0.0326124	0.0225569	0.0422744
2692	A	0.0109662	0.00580659	0.00647996	0.0165795	0.00950596	0.0242771	0.0346169	0.0366522	0.0313703	0.0130461	0.01798	0.0292202	0.0234967	0.0227987
2693	A	0.0133309	0.0196341	0.00901748	0.0239855	0.0256708	0.0305546	0.023397	0.0378289	0.0384006	0.029265	0.034123	0.0290107	0.0449374	0.0403213
2721	A	0.0140758	0.0145611	0.0175031	0.0158269	0.0137912	0.0202755	0.0237019	0.0343417	0.0183681	0.0375395	0.0168243	0.023462	0.0395161	0.0262937
2739	A	0.0163087	0.0234046	0.0165249	0.0329932	0.0320581	0.0328558	0.0078282	0.0133417	0.0174472	0.0358134	0.0211784	0.0344697	0.044038	0.0332795
2740	A	0.0112466	0.00978675	0.0154773	0.018386	0.0225035	0.0230445	0.00786174	0.00937697	0.0112957	0.00299738	0.00911605	0.0213858	0.0370642	0.0159066
2741	A	0.00614282	0.0117652	0.00885485	0.0147232	0.0139398	0.0208938	0.00261804	0.0120231	0.00878558	0.0104803	0.0106407	0.0181201	0.0197497	0.0127663
2742	A	0.0317822	0.0314243	0.0310297	0.0430086	0.0236148	0.0517958	0.020858	0.0305985	0.0200378	0.0194062	0.0364033	0.0591104	0.0609462	0.0366522
2751	A	0.199997	0.225922	0.172036	0.261839	0.19463	0.249576	0.0752343	0.0940093	0.109996	0.116068	0.0722668	0.125924	0.259498	0.122579
2753	A	0.228523	0.220967	0.154212	0.26735	0.20284	0.223667	0.116996	0.13671	0.163	0.114061	0.186141	0.152106	0.210319	0.106975
2760	A	0.0345938	0.0319197	0.0172991	0.0484366	0.0303049	0.046379	0.0393295	0.0735708	0.0605605	0.0524476	0.0556675	0.0639977	0.0525587	0.0559028
2761	A	0.0296044	0.0337849	0.0158463	0.0440182	0.0287666	0.0342434	0.0228985	0.0272892	0.0309323	0.0280034	0.0210252	0.0323061	0.041885	0.0212651
2762	A	0.0424078	0.049831	0.0243016	0.0544829	0.0358551	0.0409999	0.038894	0.0306762	0.0206226	0.0465946	0.0183913	0.030849	0.0516076	0.0297042
2779	A	0.0897306	0.104342	0.0990053	0.112626	0.0985967	0.121661	0.0997874	0.0983768	0.0967861	0.074574	0.0655697	0.0617643	0.156088	0.0829764
2783	a	0.0418448	0.0471162	0.0424496	0.0451901	0.0444222	0.084046	0.153065	0.191002	0.168937	0.172248	0.153052	0.108218	0.0896352	0.0997713
2785	A	0.0496293	0.049743	0.0558591	0.0686342	0.0466719	0.0688447	0.058168	0.0661315	0.0730744	0.0756206	0.0644866	0.0474105	0.105452	0.0378169
2791	A	0.253076	0.226897	0.259471	0.253948	0.318715	0.317146	0.41916	0.39515	0.357178	0.34168	0.368836	0.365291	0.29109	0.241377
2794	A	0.0808628	0.0909653	0.0568378	0.102917	0.0854633	0.113949	0.0533681	0.0473634	0.028937	0.0442022	0.0330296	0.0477423	0.129951	0.0432562
2802	A	0.0378718	0.0482279	0.0580986	0.0603096	0.0584923	0.0700699	0.148563	0.162527	0.143999	0.126874	0.155756	0.111999	0.101767	0.0869416
2803	A	0.0397152	0.0272742	0.0335792	0.0390298	0.0482736	0.0516668	0.0678108	0.0684077	0.0554706	0.0699466	0.0623679	0.040466	0.0754323	0.0325955
2808	A	0.0243082	0.0267725	0.0297354	0.0341957	0.0254056	0.0716644	0.0797382	0.087611	0.116801	0.0567432	0.0772145	0.111924	0.0678152	0.0824577
2809	A	0.0306498	0.0568823	0.0528383	0.0309351	0.0560996	0.0556987	0.0971158	0.109822	0.151999	0.0700378	0.0743304	0.10279	0.0713125	0.0927535
2811	a	0.0215111	0.0233125	0.015822	0.0239627	0.0283705	0.0666134	0.0396434	0.0363216	0.0420774	0.0226525	0.0263564	0.0199413	0.0963557	0.0232172
2821	A	0.0248466	0.0286783	0.0279489	0.0378515	0.0549112	0.0690953	0.0593225	0.0765583	0.0859116	0.0409826	0.0490787	0.0535668	0.0673046	0.034857
2828	A	0.0658532	0.0469337	0.0658899	0.0677946	0.0828608	0.0955652	0.0952417	0.140802	0.163288	0.107681	0.119626	0.115726	0.049385	0.0752319
2829	A	0.0209776	0.031807	0.040819	0.0275735	0.0463308	0.0719851	0.0934915	0.150146	0.178913	0.0741667	0.155942	0.0844509	0.051018	0.0631064
2831	A	0.0253696	0.0157302	0.0142003	0.0215385	0.0288751	0.0360637	0.0313805	0.0359479	0.0711043	0.0231931	0.0557807	0.0460738	0.053025	0.0350672
2832	A	0.0226635	0.0201167	0.0339201	0.0399594	0.0272267	0.0693099	0.0246751	0.0361277	0.0440571	0.0407255	0.0559523	0.0314356	0.0460693	0.0293388
2836	A	0.0399818	0.0348622	0.0309055	0.0549575	0.037155	0.0832098	0.0334717	0.0307611	0.0470879	0.0227092	0.0395914	0.0481904	0.0677966	0.0270447
2840	A	0.111812	0.121074	0.133646	0.160093	0.143	0.112222	0.122396	0.148212	0.183244	0.109014	0.136439	0.114807	0.140223	0.0788937
2841	A	0.095726	0.0861918	0.115574	0.116224	0.110288	0.0975509	0.112276	0.102988	0.124842	0.0727824	0.109556	0.0777927	0.11802	0.0678303
2845	A	0.0748351	0.0955317	0.066098	0.103604	0.0783814	0.102067	0.240878	0.214941	0.207466	0.150146	0.178441	0.281874	0.0975804	0.213299
2846	A	0.0556765	0.0582714	0.0579048	0.0707693	0.0698381	0.0498313	0.123992	0.10541	0.102023	0.0790923	0.0950299	0.103016	0.0590015	0.0975293
2853	A	0.0672932	0.0626974	0.0826856	0.0802426	0.0618999	0.102997	0.307815	0.33608	0.420128	0.2683	0.386076	0.398948	0.124028	0.305588
2854	A	0.0556686	0.0553133	0.0601491	0.0601994	0.0586707	0.0697739	0.0662989	0.074	0.0891491	0.0360385	0.0970965	0.0560976	0.0926126	0.0505993
2860	A	0.0901298	0.0853884	0.098194	0.124059	0.0838519	0.10417	0.285201	0.294857	0.284577	0.218344	0.275749	0.28342	0.134024	0.330822
2866	A	0.01663	0.0102355	0.00859803	0.0193686	0.0108557	0.0274867	0.120245	0.127245	0.141047	0.08951	0.0964601	0.0831472	0.0286918	0.112858
2867	A	0.0131515	0.00613153	0.0139592	0.0184008	0.0114338	0.0146826	0.0346645	0.0413171	0.0435053	0.0359523	0.0483977	0.0263329	0.0261774	0.0388556
2875	A	0.0272878	0.0227898	0.0223181	0.0315774	0.0346356	0.0477063	0.123912	0.149272	0.137366	0.119535	0.121498	0.133146	0.0518407	0.0977476
2877	A	0.0244095	0.0182705	0.00859531	0.0299569	0.0298354	0.0328169	0.0274151	0.0203932	0.0242184	0.0260223	0.0364222	0.0390027	0.0547524	0.0293591
2878	A	0.0244095	0.0246042	0.0161055	0.0205939	0.032888	0.0347386	0.0283814	0.0321333	0.0408453	0.0283531	0.0263728	0.0328117	0.0554663	0.0304772
2881	A	0.0385177	0.0353854	0.0374288	0.0480952	0.044876	0.0536398	0.0435491	0.0527439	0.0586096	0.0353486	0.0383189	0.0222074	0.0633727	0.0163847
2890	A	0.0639486	0.0728479	0.0666667	0.0688949	0.06467	0.106323	0.080368	0.0820271	0.119925	0.0792467	0.10811	0.100922	0.117558	0.0736794
2891	A	0.0656091	0.0830784	0.0883592	0.0872093	0.0597214	0.0771874	0.122524	0.135923	0.125665	0.0897656	0.13023	0.168156	0.103412	0.0997179
2919	A	0.094691	0.0938602	0.137031	0.134364	0.122574	0.14476	0.117374	0.105416	0.135685	0.141553	0.0859091	0.119497	0.191956	0.152363
2920	A	0.0771361	0.0672721	0.105042	0.113771	0.0910332	0.114263	0.095363	0.0973579	0.127573	0.103703	0.0842697	0.149223	0.199178	0.139303
2948	A	0.0245351	0.0554311	0.052118	0.0283076	0.032796	0.058662	0.106897	0.162501	0.352605	0.0744454	0.217293	0.324261	0.0479497	0.132069
2951	A	0.00865112	0.0197911	0.0144101	0.0172458	0.0300564	0.0375191	0.127424	0.134197	0.198523	0.123219	0.147209	0.238672	0.0193635	0.140416
2970	A	0.0640895	0.0482303	0.0524044	0.0400109	0.0703745	0.109372	0.140056	0.186971	0.259006	0.107517	0.17301	0.320032	0.0417414	0.195707
2981	A	0.0604829	0.0553476	0.0551133	0.0687898	0.00725992	0.0224348	0.154394	0.191967	0.196009	0.152943	0.119595	0.186444	0.13434	0.249627
3008	A	0.104798	0.0894712	0.107694	0.10962	0.0908748	0.127853	0.311187	0.347371	0.379636	0.3738	0.48322	0.365154	0.164581	0.382608
3037	A	0.76671	0.700536	0.698524	0.633684	0.79183	0.779661	0.410631	0.488374	0.627955	0.36194	0.521879	0.593111	0.750964	0.415532
3096	A	0.134499	0.344432	0.0735835	0	0.0860585	0.172811	0.127367	0.0741717	0.119841	0.0832562	0.1249	0.135671	0.244825	0.133901
3124	A	0.272798	0.197726	0	0.0453926	0.052521	0.148368	0.14214	0.204616	0.273973	0.12741	0.122259	0.174689	0.263105	0.235966
3126	A	0.460299	0.242307	0.0775194	0.3615	0.0518672	0.319675	0.135731	0.141325	0.152158	0.0944044	0.173669	0.128155	0.277173	0.101215
3127	A	0.304762	0.217024	0.0773096	0.225428	0.103306	0.17306	0.177695	0.13267	0.134547	0.137115	0.107075	0.0779803	0.335074	0.125786
3141	A	0.197433	0.0583005	0.176991	0.0643294	0.184911	0.060024	0.1716	0.134454	0.163827	0.11744	0.119322	0.13452	0.22521	0.122084
3184	A	0.268456	0.293591	0.286249	0.28135	0.204697	0.298708	0.424289	0.49959	0.605398	0.400254	0.369202	0.481081	0.359087	0.303622
3197	A	0.387347	0.3717	0.549289	0.399932	0.465783	0.382604	0.607375	0.893637	0.697168	0.471562	0.571889	0.74253	0.52089	0.566916
3211	A	0.0818691	0.100604	0.0903788	0.0872347	0.0742942	0.200184	0.211698	0.324128	0.491918	0.146191	0.357862	0.596236	0.184825	0.406752
3236	A	0.0209369	0.0324465	0.0471921	0.0368958	0.0326243	0.0609168	0.0527451	0.0819378	0.0399202	0.0280308	0.102786	0.120766	0.0560241	0.00719994
3243	A	0.0714678	0.0928006	0.0850461	0.102669	0.0632244	0.105094	0.322869	0.294272	0.318019	0.321482	0.212627	0.310654	0.227675	0.290213
3248	A	0.0493043	0.0844259	0.0354912	0.0570162	0.0214577	0.0510002	0.188872	0.29897	0.370108	0.174444	0.30573	0.500757	0.103073	0.33502
3267	A	0.0396144	0.0389965	0.0261575	0.0535086	0.14877	0.0925742	0.140699	0.153497	0.161177	0.12787	0.163967	0.0992994	0.124135	0.0688863
3275	A	0.0486293	0.0833681	0.0772917	0.136968	0.0778155	0.146115	0.15015	0.236069	0.20011	0.131868	0.213139	0.165749	0.188168	0.149499
3307	A	0.046968	0.0303751	0.0593042	0.0182571	0.042517	0.0822293	0.0777651	0.166123	0.173794	0.0788768	0.11216	0.300139	0.0814725	0.200962
3338	A	17.7895	16.5793	15.9242	15.9576	17.7849	18.6802	6.40394	6.67288	5.86223	5.38362	6.96568	7.44573	14.8538	6.01968
3343	A	1.34249	1.40052	1.43496	1.09837	1.75577	3.0303	0.536438	0.569177	0.499884	0.348831	0.539469	0.712449	2.50868	0.596741
3378	A	0.189189	0.268745	0.159872	0.154178	0.0890472	0.515243	0.296982	0.400283	0.499071	0.364095	0.410831	0.304729	0.284863	0.536622
3437	A	0.0119546	0.0953087	0.124054	0.106173	0.0796813	0.0131036	0.222943	0.20808	0.270861	0.214337	0.248656	0.176843	0.0528059	0.190562
3501	A	0.522004	0.310685	0.22862	0.547268	0.419711	0.479216	0.504561	0.49989	0.715349	0.529853	0.500501	0.70656	0.404149	0.52342
3510	A	0.50385	0.442012	0.349673	0.805395	0.62943	0.512622	3.5108	4.24714	4.82551	3.67539	5.85429	5.47741	0.466101	4.01367
3591	A	0.0308817	0.0720941	0.0988142	0.0584391	0.0369495	0.0876243	0.0391389	0.00880165	0.0472491	0.0110096	0.0334597	0.0458768	0.0308412	0.0234577
3594	A	0.138305	0.0970707	0.0657847	0.121165	0.227647	0.165517	0.0956981	0.176318	0.190327	0.0918063	0.175418	0.18216	0.15162	0.12842
3599	A	0.102569	0.060586	0.0356455	0.10582	0.171873	0.129863	0.0999305	0.0904077	0.15273	0.0796899	0.129863	0.116966	0.200714	0.0801925
3603	A	0.0669447	0.0989827	0.0432807	0.106146	0.096282	0.0747544	0.00430348	0.0318008	0	0.0180161	0.0169386	0.0343997	0.0962293	0.0182133
3605	A	0.0804424	0.113348	0.0426561	0.10882	0.0581776	0.0996329	0.00842354	0.0223174	0.0333593	0.0141343	0.0388048	0.0283094	0.10917	0.0134018
3606	A	0.0950333	0.107377	0.077821	0.0927118	0.101215	0.114985	0.0167877	0.0444721	0.060952	0.0316901	0.0773737	0.0846836	0.138419	0.0222896
3616	A	0.182282	0.246246	0.206385	0.238163	0.3499	0.470035	0.0554433	0.0927175	0.0994973	0.0789049	0.116767	0.113495	0.504473	0.0555793
3619	A	0.380705	0.452873	0.65945	0.475259	0.615442	0.43811	0.197929	0.22982	0.288227	0.146853	0.245023	0.329354	0.697565	0.175417
3624	A	0.0989534	0.145199	0.120872	0.182815	0.130772	0.157613	0.0991825	0.127255	0.110434	0.097145	0.107028	0.105808	0.204932	0.0820655
3625	A	0.150021	0.127853	0.143266	0.153883	0.165053	0.181074	0.0748727	0.0887227	0.0795455	0.0431383	0.079017	0.0663725	0.211983	0.0408985
3630	A	0.0746656	0.0768728	0.0844941	0.1113	0.0941576	0.114304	0.256809	0.265157	0.2688	0.230722	0.39105	0.232647	0.142943	0.202589
3637	A	0.0210847	0.00594345	0.00548968	0.0106925	0.0187572	0.0264314	0.0100035	0.00269906	0.00944584	0.00684088	0.00664187	0.00326381	0.0234217	0
3638	A	0.025292	0.00866276	0.010647	0.0121915	0.0115766	0.0290454	0.0148357	0.00266667	0.0124669	0.00225744	0.00984413	0	0.0275147	0.00517799
3641	A	0.00892565	0.00815151	0.00659152	0.00652177	0.00459116	0.00941841	0.00711339	0	0	0.0108218	0	0.00308794	0.0134278	0.00503081
3642	A	0.00443577	0.00404831	0.00490477	0.00324149	0.010626	0.0109135	0.00234522	0.00503766	0.0118779	0.00214482	0.00308328	0.00300806	0.0211365	0.00981378
3643	A	0.00884812	0.002689	0.00651423	0.0113148	0.00907071	0.0140017	0.0561312	0.0627809	0.0947671	0.0834385	0.0737033	0.0537169	0.0177786	0.046285
3644	A	0.00441625	0.00805067	0.0129936	0.00483941	0.00753682	0.0139956	0.0163273	0.0300533	0.0236763	0.0277796	0.0275794	0.0119097	0.012224	0.00972384
3646	A	0.029104	0.0251526	0.0175803	0.0303713	0.0192573	0.0560111	0.0416522	0.0719835	0.0940402	0.0574493	0.0695768	0.0411632	0.0425465	0.04818
3647	A	0.0189361	0.00397362	0.0127943	0.0255873	0.00740807	0.0280191	0.0209137	0.0274321	0.0472325	0.0235063	0.0242527	0.00588911	0.0425694	0.00724148
3648	A	0.0130863	0.0118958	0.023928	0.0271522	0.0221428	0.0233223	0.0208894	0.032385	0.0796272	0.0277594	0.0363174	0.0411208	0.0347059	0.0265086
3651	A	0.0264247	0.0119673	0.02398	0.0406266	0.0325665	0.0645995	0.0601728	0.0413576	0.0518087	0.0514968	0.0822629	0.0639153	0.063254	0.0647959
3657	A	0.0345021	0.0285915	0.0327404	0.0367953	0.057482	0.104778	0.128568	0.12028	0.152435	0.0762682	0.149119	0.234816	0.136681	0.130438
3658	A	0.0589343	0.0493859	0.0358619	0.0560188	0.0833501	0.114975	0.156931	0.124965	0.191199	0.0845797	0.13785	0.252805	0.161823	0.147733
3677	A	0.116783	0.147975	0.151349	0.212834	0.198117	0.232421	0.223138	0.153255	0.25388	0.187228	0.221147	0.220827	0.317177	0.187878
3682	A	0.0742888	0.0701333	0.0721108	0.098642	0.111732	0.07587	0.120439	0.0986787	0.151033	0.118166	0.139853	0.0930139	0.132624	0.0372407
3687	A	0.0162293	0.00806944	0.0196801	0.0247053	0.021989	0.0334027	0.00877501	0.0118745	0.029411	0.0123564	0.0212755	0.0171111	0.0278538	0.0126072
3697	A	0.0819585	0.109476	0.0987602	0.15221	0.101152	0.128372	0.0699284	0.0882657	0.115441	0.0569826	0.0743261	0.0874242	0.195124	0.0984489
3706	A	0.0296056	0.0242877	0.0331779	0.0254755	0.0148989	0.0671772	0.0131909	0.0142901	0.00262916	0.00827609	0.0190021	0.0206249	0.061442	0.0106966
3707	A	0.0340289	0.0331495	0.0219154	0.0168432	0.0376697	0.0580452	0.0131064	0.0118444	0.0183045	0.0102805	0.0188924	0.020582	0.0654347	0.0106749
3712	A	0.0269729	0.0290613	0.0266805	0.0293237	0.0134638	0.0244237	0.240653	0.217024	0.323814	0.246493	0.251692	0.318119	0.034013	0.281946
3713	a	0.0253118	0.0219503	0.0214073	0.0426803	0.0310394	0.022916	0.0819525	0.103952	0.134071	0.0951723	0.108337	0.122408	0.034858	0.0883965
3714	A	0.0112983	0.0123933	0.0115831	0.0198962	0.0178221	0.0163566	0.0505153	0.0459982	0.0393788	0.0339911	0.0273441	0.0558632	0.0284344	0.0437924
3718	A	0.0224969	0.0103504	0.0123824	0.025764	0.0335951	0.0332208	0.023236	0.0334875	0.047808	0.0234742	0.038261	0.0191874	0.0183115	0.0196742
3719	a	0.0211054	0.0232444	0.02317	0.0285311	0.0292797	0.0518534	0.0172788	0.0124704	0.0095057	0.0143254	0.00237569	0.00714643	0.0384703	0.00977594
3721	A	0.00264138	0.00905996	0.00927257	0.00999443	0.0195392	0.0133506	0.0135591	0.00842851	0.00964832	0.0108268	0.00239946	0.0120459	0.0147301	0.00395883
3722	A	0.00394602	0.00901934	0.0123132	0.0170539	0.0180566	0.0278345	0.00768064	0.0083647	0.0239332	0.0125423	0.0142895	0.0238703	0.0256056	0.00392034
3723	A	0.01638	0.00988264	0.00745256	0.0164815	0.0121719	0.028748	0.0189599	0.0164619	0.00949082	0.00352839	0.00235466	0.0070555	0.0362375	0.00579744
3727	A	0.0150165	0.0160002	0.0104418	0.0192896	0.0150177	0.0281411	0.0112219	0.0263622	0.0117675	0.0226825	0	0.00705086	0.0147093	0.0287433
3728	A	0.0178428	0.0150826	0.027366	0.0238653	0.033605	0.0282048	0.00377893	0.00818649	0.00238322	0.00352268	0	0.00975301	0.0325213	0.0137276
3731	A	0.0381112	0.0375039	0.030891	0.0720011	0.0447452	0.0901147	0.0167701	0.032335	0.0354451	0.0190932	0.0232239	0.0312891	0.0459818	0.00581914
3732	A	0.0780003	0.0479478	0.0583201	0.0874973	0.0550905	0.0854666	0.0279018	0.0363072	0.0660191	0.029394	0.0301463	0.0744459	0.0813358	0.0406433
3741	A	0.0548321	0.0467462	0.0286326	0.0780822	0.0492335	0.0786508	0.030303	0.0484166	0.0234987	0.0472289	0.043818	0.0649671	0.101496	0.0528072
3742	A	0.12044	0.0916983	0.0583143	0.128111	0.0677984	0.130378	0.0243122	0.0397325	0.0392249	0.0381361	0.0414311	0.0984686	0.183422	0.0610899
3743	A	0.0911736	0.0970862	0.07361	0.108265	0.0860597	0.113694	0.0306918	0.0646369	0.0632278	0.04764	0.0565055	0.104411	0.184583	0.0766088
3751	A	0.0451587	0.0578628	0.0688045	0.0812339	0.0570699	0.0766897	0.0645504	0.101958	0.0672199	0.102044	0.0627896	0.0804593	0.0839051	0.0623709
3754	A	0.0284091	0.0232955	0.0272362	0.0326438	0.0273058	0.0269842	0.0342394	0.0508017	0.0626087	0.0358264	0.0473811	0.0494507	0.0336442	0.0309358
3755	a	0.0236325	0.0253006	0.0411025	0.0426705	0.0327602	0.0607882	0.0189836	0.0365097	0.0254801	0.0323779	0.0258076	0.0279072	0.0631417	0.0386004
3758	A	0.00924197	0.0123624	0.00763176	0.0198369	0.00613133	0.015071	0.0704643	0.0474477	0.0384372	0.0484294	0.0478788	0.0200056	0.0263824	0.0215351
3761	A	0.00892514	0.00426457	0.00952825	0.0121343	0.0079889	0.0226798	0.0319225	0.070198	0.0731161	0.0269138	0.044003	0.0121822	0.0274839	0.0270846
3769	A	0.0203695	0.0250637	0.0121666	0.0165122	0.0174436	0.04382	0.0265697	0.0152214	0.00981186	0.0235806	0.026848	0.019019	0.033302	0.018568
3770	A	0.0755281	0.0630405	0.0597862	0.0514973	0.0813315	0.0455234	0.0245771	0.0195725	0.0171535	0.0163681	0.0246283	0.0422119	0.0478133	0.0465194
3774	A	0.0416202	0.0420819	0.0557464	0.0401415	0.0393365	0.040462	0.130663	0.111787	0.147014	0.101216	0.112759	0.0760071	0.054596	0.0772637
3778	A	0.0369638	0.0376737	0.0463626	0.0445805	0.0493192	0.0579077	0.231395	0.228053	0.282058	0.229478	0.215422	0.0955209	0.0934083	0.164814
3779	A	0.0537712	0.0520165	0.05009	0.0610104	0.0604607	0.0553077	0.238836	0.1792	0.268097	0.166465	0.142569	0.113029	0.072155	0.15984
3780	a	0.0401198	0.0325211	0.0429496	0.0393848	0.0537965	0.0488493	0.0834757	0.0536315	0.080837	0.0678367	0.0522034	0.0204336	0.0955153	0.0253614
3790	A	0.0108419	0.00861267	0.00749874	0.0114757	0.00909955	0.0222332	0.0578291	0.036713	0.0571925	0.0292982	0.0283107	0.0281158	0.0197896	0.0358064
3794	A	0.00246775	0.0046905	0.00294583	0.0067285	0.0018059	0.0127237	0.0054178	0.00387988	0	0.00328758	0	0	0.0207448	0.00341419
3795	A	0.00319346	0.00227445	0.00669805	0.00654873	0.00525532	0.0234547	0.00535036	0.00575186	0.00218446	0.00650766	0.00410155	0.00376967	0.0262121	0.0084391
3798	A	0.00894062	0.00847908	0.00291494	0.0123931	0.00803449	0.0170774	0.00180063	0.00778059	0.00668732	0	0.00208755	0	0.0179826	0.0154969
3802	A	0.0173425	0.0172704	0.0133136	0.0203184	0.0122438	0.0261712	0.0549885	0.0853543	0.0795921	0.0551372	0.0624421	0.0261165	0.0220834	0.0150341
3808	A	0.080744	0.0658658	0.0831652	0.0757867	0.0932283	0.138541	0.0311834	0.0411946	0.0512695	0.0225432	0.0165224	0.0392742	0.207259	0.0274589
3811	A	0.0197623	0.0200054	0.0344772	0.0353937	0.0258179	0.0364992	0.0209728	0.0242959	0.0207585	0.0121029	0.0153057	0.0197827	0.0505076	0.0095155
3812	A	0.0209089	0.0255446	0.0279076	0.036834	0.0312438	0.0281731	0.0357392	0.0472557	0.0188387	0.0243513	0.0173598	0.0218253	0.0453816	0.0240601
3816	A	0.0197027	0.019038	0.0130563	0.0235304	0.0255418	0.0369928	0.0610473	0.0819159	0.0611691	0.058706	0.0354736	0.060031	0.0400467	0.0489578
3819	A	0.0266729	0.0232751	0.01091	0.0266233	0.0167832	0.024174	0.0394841	0.0410062	0.0489578	0.0248053	0.0557938	0.0280625	0.0183985	0.0251245
3820	a	0.0205172	0.026436	0.0140882	0.0223871	0.0186668	0.0358281	0.137476	0.126454	0.173184	0.121163	0.0984779	0.0689814	0.0343571	0.0824269
3823	A	0.0133144	0.0136634	0.0115903	0.0267873	0.0153648	0.0175416	0.325806	0.267705	0.320507	0.231035	0.204691	0.133002	0.0145308	0.162576
3825	a	0.0291992	0.0218613	0.0153431	0.0389457	0.0347206	0.0402283	0.102318	0.0907249	0.133278	0.0987154	0.129349	0.0513784	0.0638741	0.0520577
3831	A	0.136126	0.120693	0.161829	0.178453	0.161229	0.179607	0.289831	0.318595	0.341303	0.248078	0.229699	0.11806	0.153004	0.097003
3840	A	0.0689699	0.0638877	0.0520879	0.095511	0.0666917	0.0744012	0.0414002	0.0690983	0.0881631	0.0462141	0.0432994	0.0325889	0.109118	0.0610305
3844	A	0.0383764	0.0332824	0.0296519	0.0730713	0.0566198	0.0695841	0.038586	0.0191077	0.0202384	0.0237762	0.0208142	0.02825	0.0815915	0.0214228
3847	A	0.0498484	0.0418019	0.0377418	0.0637029	0.0797463	0.0681225	0.0356861	0.0190546	0.0256871	0.037891	0.0381236	0.0301366	0.0843903	0.0138988
3851	A	0.0923615	0.0796416	0.0668516	0.115559	0.111232	0.156667	0.219091	0.174382	0.192529	0.15649	0.229676	0.112268	0.176698	0.0930665
3855	A	0.0958873	0.0880411	0.126934	0.167564	0.128654	0.227989	0.0343204	0.0174528	0.0326115	0.0145259	0.0243994	0.0266351	0.186404	0.0179078
3856	A	0.0945666	0.0975677	0.116581	0.115271	0.144882	0.145048	0.0192798	0.0291537	0.0310529	0.0198776	0.0293442	0.0300792	0.1629	0.01798
3857	A	0.173506	0.167705	0.206937	0.21855	0.201782	0.197888	0.0303956	0.0468261	0.0425671	0.0399233	0.0376469	0.0351888	0.260349	0.0285084
3860	A	0.265361	0.28546	0.28968	0.350676	0.358807	0.422878	0.212927	0.163738	0.201676	0.180078	0.199748	0.215057	0.520254	0.187836
3862	a	0.359071	0.31574	0.379178	0.43783	0.330005	0.33729	0.2641	0.294641	0.175364	0.231611	0.192336	0.303274	0.403069	0.192868
3866	A	0.175629	0.152021	0.139509	0.210592	0.1842	0.297168	0.0798513	0.117471	0.11595	0.0858868	0.166879	0.182455	0.377815	0.0887233
3867	A	0.153021	0.122993	0.135744	0.192775	0.166645	0.230615	0.0955766	0.0894416	0.0970694	0.0881774	0.115987	0.116989	0.30832	0.0781035
3871	A	0.10779	0.120822	0.0971803	0.14776	0.12064	0.180707	0.164281	0.241947	0.25821	0.13997	0.173922	0.265214	0.257481	0.13223
3872	A	0.281044	0.289808	0.365051	0.270844	0.277443	0.482503	0.177726	0.294375	0.25602	0.143464	0.260038	0.299234	0.538554	0.187135
3885	A	0.286811	0.292514	0.323888	0.235588	0.262167	0.184619	0.08452	0.12234	0.115967	0.0714929	0.112082	0.0893365	0.186147	0.0568406
3886	A	0.13045	0.128241	0.0948124	0.115789	0.0987841	0.095349	0.0589812	0.0687654	0.0707985	0.058374	0.0448283	0.0486705	0.123693	0.0347031
3889	A	0.237704	0.252059	0.220212	0.306577	0.298647	0.345362	0.28207	0.335406	0.449533	0.217548	0.38497	0.658989	0.325619	0.353864
3896	A	0.0585512	0.0663217	0.0639419	0.0809113	0.0657036	0.0803149	0.059522	0.0695018	0.0810767	0.0485003	0.0649676	0.0726562	0.0922815	0.0384329
3897	A	0.284903	0.278833	0.2208	0.327466	0.334955	0.199256	0.0723125	0.0690124	0.0912007	0.0492535	0.0927644	0.0851154	0.150234	0.0701804
3898	A	0.0376429	0.030541	0.0229564	0.0529094	0.0424966	0.0320094	0.0252815	0.016379	0.0317486	0.0210984	0.0288616	0.0318576	0.0604339	0.0280379
3900	A	0.0279728	0.0395599	0.0153617	0.0333744	0.039529	0.0446517	0.0515556	0.0648827	0.0581619	0.0756708	0.0646711	0.0625958	0.0513995	0.0542185
3901	A	0.040821	0.0453357	0.022184	0.0555845	0.0336009	0.0448579	0.0853551	0.0903369	0.138221	0.0760765	0.104288	0.355482	0.0655105	0.183394
3903	A	0.0299418	0.0262762	0.0226109	0.0380645	0.0365703	0.055256	0.107552	0.133416	0.134104	0.0781226	0.128831	0.147363	0.0746736	0.130966
3912	A	0.00529221	0.00507991	0.00978576	0.0165914	0.00639275	0.0171794	0.013872	0.0200055	0.0176658	0.011316	0.0334342	0.0146986	0.0161774	0.010932
3918	A	0.0146432	0.00951051	0.00595557	0.0262647	0.00771971	0.0240377	0.0146583	0.0291096	0.0311084	0.0220618	0.0219554	0.0250034	0.0188942	0.0271821
3923	A	0.0200316	0.0153406	0.00922199	0.0234325	0.0158933	0.0261742	0.0235109	0.0290601	0.0283492	0.017579	0.025834	0.0145944	0.0262646	0.0140772
3931	A	0.0536484	0.0491135	0.0586326	0.0717826	0.0625583	0.102426	0.134286	0.166834	0.158562	0.128521	0.166372	0.170955	0.118914	0.112578
3937	A	0.0532581	0.0542073	0.0384402	0.060572	0.0422833	0.0879414	0.0863111	0.105827	0.0827058	0.0920525	0.0850486	0.0906533	0.10778	0.0708466
3938	A	0.0624685	0.0635183	0.0515918	0.0727888	0.0670237	0.117265	0.0547893	0.0618654	0.091319	0.0454089	0.0860714	0.0839289	0.135437	0.079101
3940	A	0.0376998	0.03368	0.0315781	0.0644745	0.0407575	0.097508	0.0448138	0.0517695	0.0472468	0.0533179	0.0421367	0.0396782	0.0868797	0.0711035
3942	A	0.0445825	0.0479702	0.0411028	0.0655109	0.059309	0.083382	0.105594	0.0971396	0.0700978	0.0868842	0.0826037	0.0825241	0.0854069	0.0899671
3944	A	0.0471822	0.0515933	0.036795	0.064849	0.0555191	0.0724026	0.0973766	0.124767	0.123742	0.0948679	0.0710755	0.153618	0.101697	0.140287
3947	A	0.0349866	0.0355554	0.037365	0.0389469	0.0398191	0.0724584	0.0558169	0.0504291	0.0696211	0.0570519	0.0445117	0.122386	0.09104	0.0871777
3949	A	0.0272562	0.0247307	0.0252645	0.0390573	0.0407612	0.0619172	0.069855	0.0867725	0.0905983	0.0690356	0.0760037	0.0590651	0.0604831	0.0660202
3955	A	0.0403257	0.0484473	0.0328594	0.0664641	0.0624323	0.0615327	0.0796875	0.0680901	0.0808982	0.0800987	0.0652667	0.0923585	0.0890647	0.0816119
3957	A	0.0178358	0.0212977	0.0219209	0.0376912	0.0352538	0.0385491	0.0449658	0.0520536	0.0357285	0.0414155	0.0831514	0.0953931	0.061214	0.0529857
3958	A	0.0240263	0.0192188	0.0224252	0.0336639	0.0321344	0.0475063	0.0299685	0.0282654	0.0274354	0.0269385	0.0204569	0.0227032	0.0377959	0.027049
3960	A	0.0323258	0.0182923	0.0173227	0.0468706	0.0165792	0.0430358	0.0358084	0.0219223	0.0444624	0.0264489	0.0400974	0.0302219	0.0450916	0.0400083
3961	A	0.0506103	0.0506728	0.0361197	0.0964411	0.0464765	0.054263	0.0798467	0.118679	0.0905217	0.0837502	0.0997506	0.10082	0.083643	0.101674
3967	A	0.114356	0.103376	0.0978653	0.119534	0.0925559	0.100904	0.139027	0.162239	0.134526	0.123085	0.142689	0.144596	0.096759	0.142917
3998	A	0.0629829	0.0644178	0.051415	0.099861	0.0267895	0.0279894	0.0350437	0.0480509	0.0531201	0.0424827	0.0324014	0.0440608	0.0650317	0.0450694
4041	A	0.0241785	0.0170337	0.0256376	0.0252521	0.031674	0.038161	0.0462003	0.0218237	0.0458747	0.0241515	0.0255822	0.0343299	0.049753	0.0385884
4042	A	0.0171441	0.0200803	0.01775	0.0224119	0.0197895	0.0315831	0.000987381	0.00796924	0.00782733	0.00577174	0.0137563	0.0182875	0.0535103	0.00375686
4043	A	0.0257923	0.0147112	0.0177987	0.0168498	0.020568	0.0458763	0.00497815	0.00603531	0.00788675	0.0151323	0.0138663	0.0154094	0.0562887	0.00759628
4045	A	0.0181331	0.023423	0.042665	0.0254643	0.0215008	0.027222	0.0299182	0.0405485	0.0417163	0.0168598	0.0324778	0.0301273	0.0461543	0.0293345
4048	A	0.0890451	0.0788448	0.163617	0.0870298	0.0704701	0.0627089	0.578961	0.663726	0.933169	0.574796	0.623632	0.455949	0.0659719	0.43104
4051	A	0.0179089	0.0145773	0.0131436	0.00749092	0.0136595	0.0255828	0.055255	0.0601685	0.0891764	0.042632	0.051569	0.0428837	0.0261053	0.0271186
4057	A	0.00719806	0.0128281	0.0128155	0.0174948	0.0107075	0.0155096	0.110091	0.161259	0.158812	0.116685	0.174056	0.301805	0.0185957	0.249395
4068	A	0.0239837	0.026606	0.0157187	0.0382884	0.0188225	0.0160459	0.0958367	0.113954	0.10589	0.0971753	0.111884	0.0696812	0.0269854	0.0395317
4072	A	0.0689479	0.0567133	0.0624267	0.0768681	0.0669143	0.0659426	0.0883639	0.112304	0.145869	0.0832816	0.120675	0.162868	0.0723777	0.11319
4080	A	0.144078	0.104813	0.094639	0.18182	0.115473	0.12495	0.144385	0.17376	0.19969	0.140329	0.20013	0.226087	0.157842	0.232803
4093	A	0.166884	0.110964	0.0850767	0.224651	0.153132	0.156917	0.159662	0.202474	0.176924	0.187841	0.185709	0.197774	0.168978	0.202146
4100	A	0.0574939	0.0573195	0.0466581	0.0921647	0.0931437	0.0797483	0.136941	0.185148	0.210115	0.125896	0.18778	0.261934	0.116477	0.167677
4122	A	1.09247	1.30358	1.79286	1.01819	1.82206	1.68062	0.478033	0.519768	0.541094	0.380424	0.520899	0.461162	1.23119	0.257199
4123	A	2.35652	2.42608	2.43552	2.20059	4.06867	3.78801	0.566815	0.52936	0.501585	0.52396	0.665918	0.857411	2.10787	0.601627
4152	A	0.0224407	0.0226419	0.0429553	0.0397984	0.021891	0.0397502	0.0580464	0.0590344	0.0670511	0.043802	0.0182109	0.0371913	0.0580841	0.0389127
4165	A	0.0234137	0.0339771	0.0330666	0.0355312	0.0208353	0.0158373	0.0349432	0.022906	0.0273075	0.0155833	0.0191073	0.0160256	0.0835954	0.023106
4167	A	0.0274413	0.0233092	0.0419065	0.056266	0.0144977	0.046221	0.0591913	0.0516974	0.0566174	0.0627857	0.044241	0.0370679	0.0649166	0.0470293
4173	A	0.0767015	0.0784742	0.0500021	0.0585095	0.0420777	0.0746542	0.0395831	0.0625634	0.0410678	0.047531	0.0448585	0.0428668	0.135675	0.0498313
4181	A	0.0460413	0.0389087	0.0366979	0.0550309	0.0344791	0.0411831	0.0630629	0.0625504	0.0798085	0.0600962	0.0557406	0.0784809	0.0787903	0.0680235
4187	A	0.0464946	0.033295	0.0509962	0.0810442	0.0566268	0.0640886	0.0352758	0.0593431	0.0878592	0.0533988	0.0778474	0.063308	0.0970333	0.0638388
4198	A	0.125441	0.135946	0.0874812	0.11388	0.19001	0.268643	0.108546	0.113047	0.0842005	0.0724375	0.0950101	0.0957125	0.181341	0.0849149
4200	A	0.0725492	0.138906	0.0544662	0.102984	0.160858	0.189119	0.151348	0.187497	0.161919	0.13254	0.22121	0.146959	0.0985186	0.125513
4207	A	0.0232266	0.0319251	0.0162917	0.0135385	0.0286199	0.0617179	0.0180648	0.0246662	0.0217024	0.018815	0.0221729	0.0234842	0.0786746	0.0180865
4208	A	0.0420875	0.0263139	0.0357827	0.022305	0.0564345	0.0462292	0.018113	0.0198574	0.0280829	0.0171762	0.0165429	0.0297689	0.0638337	0.020063
4209	A	0.0247841	0.0262261	0.0267547	0.0311028	0.0401276	0.0419252	0.0164769	0.00496812	0.028129	0.0120306	0.0128525	0.0233784	0.0561372	0.0140362
4214	A	0.0194307	0.0372384	0.018234	0.0473988	0.0337792	0.0369426	0.256795	0.328476	0.547085	0.163649	0.344269	0.341094	0.0933186	0.200273
4215	a	0.0591981	0.0662495	0.043592	0.0524679	0.0818987	0.116382	0.0736879	0.0640396	0.113788	0.0362497	0.0748947	0.0823031	0.110039	0.058336
4219	A	0.0386781	0.0513193	0.0377194	0.0667894	0.0562891	0.0558811	0.121585	0.162248	0.197057	0.120015	0.150939	0.122788	0.0999753	0.123275
4228	A	0.0237045	0.0499119	0.0312105	0.0549058	0.0805497	0.0847601	0.0188372	0.0180756	0.0441344	0.016508	0.0315737	0.0134217	0.116862	0.0157505
4229	A	0.0600819	0.0514154	0.038679	0.0750366	0.106957	0.10008	0.0486519	0.0531075	0.0343618	0.0372969	0.0407406	0.0403253	0.155527	0.0346855
4234	A	0.133821	0.117073	0.116443	0.163259	0.169292	0.199979	0.286061	0.360946	0.36695	0.263051	0.333414	0.264251	0.200027	0.198273
4239	A	0.112771	0.103148	0.0700352	0.154576	0.108517	0.17338	0.104655	0.107991	0.111924	0.0635781	0.0932996	0.129355	0.188845	0.0801527
4243	A	0.0353423	0.05018	0.0186415	0.0846328	0.0541075	0.0636196	0.074255	0.097376	0.0658832	0.0725977	0.0811	0.103607	0.0840202	0.0621782
4246	A	0.0581254	0.0417595	0.0406318	0.0487433	0.0578628	0.0622003	0.114055	0.124953	0.0996246	0.0808341	0.127894	0.14754	0.0835499	0.0723957
4248	A	0.0416127	0.0314899	0.0206844	0.0396918	0.039795	0.0459695	0.0366773	0.0305423	0.0292103	0.0379269	0.0263574	0.0453386	0.042107	0.0275738
4250	A	0.0283509	0.0251964	0.0234787	0.0266203	0.0234459	0.0439982	0.0101073	0.0135921	0.0161418	0.0171962	0.0130047	0.029773	0.0430987	0.0186125
4251	A	0.0250556	0.0176707	0.0145826	0.0352553	0.0217753	0.0373808	0.010015	0.0149779	0.00799962	0.00853364	0.0096929	0.00919473	0.0417952	0.00670702
4252	A	0.0292745	0.0173885	0.0071803	0.0399764	0.0169348	0.0294533	0.00822391	0.00428866	0.0121656	0.00959522	0.00769598	0.0177819	0.0326784	0.018018
4263	A	0.041952	0.0292	0.0422914	0.0422584	0.038043	0.057301	0.0124339	0.0100216	0.0168567	0.0150794	0.0261551	0.0239481	0.0676989	0.038852
4266	A	0.0674318	0.0350285	0.0463261	0.0796472	0.0580199	0.0869769	0.0274055	0.0351171	0.033585	0.0350841	0.0439284	0.0473878	0.103828	0.0527115
4268	A	0.0522295	0.0581403	0.0574882	0.0858944	0.0608029	0.111413	0.177723	0.196336	0.190804	0.156178	0.193684	0.183036	0.117822	0.145423
4269	A	0.040451	0.0544224	0.0459752	0.113511	0.0552448	0.0584926	0.230855	0.217971	0.191357	0.176139	0.204587	0.19913	0.0900698	0.149761
4274	A	0.306283	0.331867	0.273189	0.320651	0.205822	0.347254	0.777965	0.761994	0.669807	0.570102	0.585652	0.756542	0.382758	0.561473
4275	A	0.227256	0.245801	0.194756	0.244284	0.19227	0.242726	0.363646	0.328063	0.345081	0.272356	0.297401	0.302657	0.18371	0.238976
4276	A	0.0690811	0.0793033	0.0725539	0.117463	0.0732578	0.100326	0.0316415	0.0340857	0.0534709	0.0332705	0.0399284	0.0305559	0.127034	0.02936
4277	A	0.0618848	0.0696092	0.0520338	0.0806868	0.0641407	0.0494584	0.014445	0.0148918	0.0410613	0.0139233	0.0144326	0.0344597	0.0698271	0.0329084
4287	A	0.00900657	0.00996413	0.00668458	0.0154362	0.0137349	0.0295513	0.0101772	0.0134531	0.0159051	0.00968295	0.0144219	0.00387837	0.0303047	0.0178763
4293	A	0.025564	0.00494303	0.0106335	0.0167373	0.0137393	0.0207589	0.0571886	0.064645	0.095679	0.0821648	0.0644745	0.055937	0.0186771	0.0481026
4299	A	0.0064502	0.00498753	0.00938766	0.00845606	0.00973047	0.0105249	0.0478108	0.0626697	0.103502	0.0527675	0.0752168	0.0117962	0.0154673	0.009038
4302	A	0.0120453	0.0103486	0.00278967	0.0058512	0.0072469	0.0172446	0.0438404	0.0309084	0.0361932	0.0255704	0.0194604	0.0318776	0.0123128	0.011623
4305	A	0.0208894	0.0264634	0.0163421	0.0256912	0.0170392	0.0154614	0.0215953	0.0384825	0.0607175	0.034313	0.0313529	0.0311915	0.0318863	0.0189674
4306	A	0.0336849	0.020025	0.0324759	0.0297839	0.0211882	0.0322536	0.0539865	0.0384498	0.0539029	0.044827	0.045267	0.0456716	0.0401108	0.0322025
4308	A	0.0344497	0.0278262	0.0531196	0.0393552	0.0439338	0.0382256	0.0406979	0.0330736	0.0418267	0.0119482	0.0338902	0.0171145	0.0445059	0.0200316
4310	A	0.074657	0.0764608	0.120372	0.07507	0.0889711	0.106488	0.269137	0.226127	0.41378	0.200544	0.176353	0.148191	0.122969	0.0942359
4312	A	0.0830389	0.088182	0.0697674	0.0338379	0.0701819	0.0801417	0.157136	0.159969	0.234799	0.125885	0.186729	0.0755956	0.0671974	0.0687807
4318	A	0.0559395	0.0523598	0.0737901	0.0611898	0.0493654	0.0914648	0.0718477	0.0793866	0.127815	0.0947347	0.110446	0.0953678	0.0981137	0.0819521
4319	A	0.0427112	0.0316963	0.0425813	0.0427978	0.0384262	0.0681477	0.0223157	0.037998	0.0566765	0.026688	0.0388969	0.0545727	0.121306	0.0328017
4320	A	0.0726839	0.080624	0.11139	0.124933	0.0836964	0.219672	0.0562114	0.0790841	0.146369	0.0364709	0.0578815	0.243429	0.245816	0.132864
4331	A	0.0684127	0.0543755	0.0819448	0.0743619	0.0673055	0.0945698	0.262659	0.287666	0.253751	0.229578	0.237866	0.20696	0.141008	0.231345
4334	A	0.0247407	0.0271421	0.0125615	0.0261756	0.0301461	0.0432852	0.0452724	0.0561246	0.0332208	0.058418	0.0430212	0.0693919	0.0484486	0.0281062
4343	A	0.0106919	0.01189	0.00867303	0.0225649	0.0191785	0.0492836	0.0163361	0.0224824	0.0315709	0.0212328	0.0129397	0.0104727	0.0411294	0.0353232
4357	A	0.0536641	0.0485832	0.0369576	0.0489561	0.0517246	0.0681555	0.0191519	0.0271182	0.0393752	0.0392705	0.0367924	0.0791374	0.050396	0.0273015
4358	A	0.0746246	0.10589	0.0902781	0.0964396	0.093216	0.101418	0.0446635	0.0879999	0.0879936	0.0424341	0.0772002	0.121987	0.0809389	0.0580204
4361	A	0.118175	0.0854961	0.106238	0.10579	0.100073	0.132316	0.115077	0.111607	0.176184	0.101846	0.106639	0.154315	0.129916	0.138313
4364	A	0.147679	0.153045	0.129474	0.167751	0.132883	0.101498	0.0838448	0.12694	0.155071	0.086527	0.105288	0.113669	0.0867376	0.0834057
4371	A	0.0456426	0.0385431	0.0250693	0.0531657	0.0501811	0.0370195	0.0157569	0.0191202	0.0266477	0.0194962	0.0201132	0.0188987	0.0485809	0.0121273
4373	A	0.012982	0.0161549	0.0204775	0.0353498	0.025059	0.0156223	0.0334397	0.0521376	0.0361685	0.0367372	0.04346	0.0243587	0.0208564	0.0204178
4374	A	0.0129439	0.0120765	0.0122472	0.019927	0.0144484	0.0155437	0.0153698	0.011971	0.0201668	0.0176476	0.0139509	0.00891129	0.0141345	0.012656
4375	A	0.00872283	0.0067714	0.0164645	0.0154612	0.0119254	0.0184457	0.0119201	0.0178216	0.0416536	0.00520393	0.0115523	0.018287	0.0200413	0.0142371
4376	A	0.0216042	0.0147372	0.0148951	0.0245218	0.0130314	0.0279178	0.00128698	0.00398756	0.00287998	0.00634832	0.00835969	0.0154877	0.0214965	0.00512472
4380	A	0.0882217	0.107351	0.131388	0.122023	0.0990151	0.0880255	0.157118	0.179678	0.194372	0.168267	0.135274	0.0687665	0.0729914	0.0638179
4383	A	0.0795595	0.096663	0.104058	0.0961701	0.119595	0.113729	0.23772	0.325651	0.278384	0.24055	0.202235	0.157571	0.146563	0.144255
4385	A	0.0752988	0.0667237	0.088856	0.0941056	0.0880232	0.0963954	0.168119	0.177405	0.200497	0.14343	0.118924	0.135879	0.183626	0.155314
4389	A	0.0997334	0.085186	0.11036	0.0897308	0.109636	0.130232	0.147668	0.160906	0.14112	0.125907	0.0894988	0.11515	0.150305	0.0992791
4391	A	0.0243331	0.0349089	0.0567067	0.0584834	0.0529167	0.106858	0.0145673	0.0181069	0.0144555	0.010141	0.0183764	0.0144919	0.127945	0.0103996
4392	A	0.0598793	0.0523322	0.0691165	0.0935623	0.102036	0.0969744	0.0307436	0.0182329	0.0372126	0.0203779	0.0169695	0.0234449	0.173553	0.0179953
4409	A	0.0577386	0.0474749	0.0574548	0.0668051	0.0365796	0.0694505	0.0271169	0.0294031	0.0340105	0.022501	0.0213092	0.0347515	0.0830619	0.0426482
4410	A	0.0702557	0.0499339	0.0388321	0.0483049	0.0794329	0.0798278	0.0184154	0.0160549	0.0245663	0.0181223	0.0197464	0.0304826	0.099665	0.0338271
4417	A	0.0125788	0.00704503	0.0113983	0.012065	0.0136849	0.0304777	0.00960931	0.0113858	0.0135273	0.0148816	0.0150501	0.0194881	0.0415517	0.0137785
4419	A	0.0188079	0.0182569	0.0184898	0.0206459	0.0181544	0.0209737	0.0261283	0.0328515	0.0271719	0.0243201	0.0191726	0.0469386	0.0462125	0.0439434
4423	A	0.0213236	0.0231737	0.0466565	0.0300636	0.0262691	0.0338325	0.137962	0.102553	0.14628	0.113698	0.079426	0.0598211	0.0476275	0.0785535
4436	A	0.0141721	0.0142153	0.010985	0.0211868	0.0211351	0.0281488	0.00796762	0.0118257	0.0180623	0.0108665	0.00638702	0.00320657	0.0234099	0.00818907
4444	A	0.0233762	0.0307523	0.0209488	0.0486391	0.0217848	0.0515996	0.0126715	0.0169316	0.0196688	0.0123699	0.0127073	0.0187252	0.0526097	0.0075784
4459	A	0.055145	0.0602279	0.0379948	0.0651427	0.0690067	0.0548535	0.0105829	0.0167691	0.0113368	0.00695447	0.00890821	0.00615356	0.0559963	0.00647794
4462	A	0.035058	0.0255879	0.0333754	0.0221849	0.0386729	0.0272529	0.00170343	0.00890187	0.0108619	0.00843526	0.0119572	0.00557538	0.0527038	0.00882548
4468	A	0.0396471	0.0326429	0.0253214	0.0398927	0.0428438	0.0381888	0.0252224	0.0226892	0.0269319	0.0199967	0.00842275	0.0147378	0.0610393	0.0185389
4469	A	0.0800534	0.0419803	0.0740045	0.124369	0.0587574	0.0637013	0.0370115	0.0366262	0.0395463	0.0166772	0.0202228	0.0214693	0.0877792	0.0157159
4472	A	0.0583871	0.0371885	0.0148012	0.0714501	0.0317528	0.0452105	0.0272118	0.02497	0.0189688	0.0220799	0.0129595	0.0104646	0.0484302	0.0180586
4474	A	0.0625897	0.063346	0.0317844	0.0967235	0.0488183	0.0757146	0.0327971	0.0510621	0.047609	0.0420869	0.0347705	0.0480634	0.0860003	0.0556777
4475	A	0.0657342	0.0494951	0.0537023	0.0800384	0.0996356	0.103568	0.0243262	0.0303424	0.0279686	0.0288485	0.0312218	0.0239254	0.065476	0.0241433
4479	A	0.0322777	0.061168	0.0310385	0.0743756	0.0390592	0.0514883	0.0388526	0.0251957	0.0349382	0.0321234	0.0263726	0.0133656	0.078635	0.0345145
4482	A	0.0981132	0.119499	0.129633	0.0710079	0.0569886	0.107787	0.0949918	0.097796	0.109896	0.108066	0.0934697	0.0343889	0.152546	0.025206
4483	A	0.0382307	0.0345901	0.0370932	0.0338753	0.0334001	0.093148	0.0320342	0.0146676	0.0307114	0.0161658	0.0218492	0.0200927	0.0742436	0.0220869
4491	A	0.10297	0.0585245	0.0557683	0.0877848	0.0710271	0.0477023	0.0314182	0.015324	0.0321995	0.0266077	0.0174083	0.0270129	0.101072	0.0107848
4498	A	0.0601946	0.0431499	0.0249641	0.0798896	0.0497735	0.0629987	0.0949632	0.143583	0.133936	0.107911	0.0810085	0.0369239	0.0633561	0.0799012
4502	A	0.0554365	0.0403266	0.0408678	0.0484692	0.0590763	0.114008	0.112638	0.125572	0.146532	0.115181	0.142813	0.146609	0.0299608	0.0910077
4505	A	0.0704695	0.0535798	0.0781755	0.0647249	0.0902647	0.148277	0.0124272	0.0107835	0.0212791	0.0187508	0.00891742	0.0221231	0.138826	0.0137471
4506	A	0.108436	0.108328	0.0995503	0.0980913	0.0831679	0.216146	0.0230792	0.0218069	0.0478354	0.0168962	0.0180534	0.0392362	0.225986	0.0238289
4508	A	0.126164	0.10455	0.103316	0.174089	0.104929	0.212044	0.0275862	0.0439967	0.0482393	0.0277505	0.063619	0.0357997	0.331051	0.046143
4512	A	0.191444	0.158937	0.183084	0.18562	0.10432	0.270083	0.394544	0.439073	0.57689	0.362365	0.559473	0.600203	0.173542	0.355142
4513	A	0.181583	0.159505	0.18104	0.227972	0.134696	0.172403	0.352466	0.281867	0.415832	0.291763	0.328932	0.41997	0.21098	0.277843
4518	a	0.1213	0.106216	0.10481	0.146345	0.096436	0.07486	0.211941	0.273247	0.335297	0.214903	0.184437	0.377453	0.171239	0.29676
4528	A	0.0458313	0.0443927	0.0236318	0.0600267	0.0271101	0.0810858	0.0590232	0.0432703	0.0924459	0.0397972	0.0565891	0.0541712	0.0828985	0.0530544
4530	A	0.0536523	0.0498578	0.035496	0.079913	0.0287905	0.0339001	0.049059	0.052984	0.0947022	0.0665336	0.0717059	0.0486808	0.0853795	0.0447698
4539	A	0.0407319	0.0451172	0.0419998	0.0424118	0.0398084	0.0624136	0.122477	0.104733	0.17502	0.0990579	0.176056	0.131594	0.0642983	0.0925093
4541	A	0.120544	0.0884969	0.0728614	0.126347	0.0950046	0.102923	0.285199	0.291887	0.312445	0.252985	0.271453	0.28059	0.165336	0.379273
4543	A	0.0183528	0.0183808	0.0317115	0.0325342	0.0301705	0.0532252	0.0463485	0.0530763	0.0837641	0.0362421	0.0409871	0.0409227	0.0723831	0.0531029
4548	A	0.0196481	0.0209679	0.0059805	0.020387	0.0190951	0.0325056	0.0196882	0.0246576	0.0336545	0.0127007	0.027176	0.0241887	0.0335106	0.0122629
4554	A	0.0438353	0.0325362	0.0290305	0.0427217	0.0441445	0.066433	0.139487	0.145712	0.18128	0.148006	0.112892	0.0749358	0.0770053	0.0958491
4559	A	0.0792331	0.0536543	0.0360756	0.0942356	0.0786384	0.13482	0.146628	0.134908	0.117265	0.0913823	0.119778	0.0383745	0.104643	0.0611701
4563	A	0.0455145	0.0525859	0.0445147	0.0729445	0.0453303	0.116976	0.0359774	0.0745449	0.0730628	0.035822	0.0662824	0.0557242	0.126708	0.0477595
4566	a	0.0481449	0.0309128	0.0333288	0.0499466	0.0403513	0.0743165	0.0593703	0.0960172	0.0917431	0.0664894	0.0727359	0.0774272	0.102147	0.0692775
4579	A	0.162781	0.14409	0.123963	0.211778	0.191758	0.115595	0.334588	0.310439	0.364723	0.304471	0.350383	0.297012	0.159699	0.211467
4584	A	0.0285796	0.0411629	0.0188626	0.0475502	0.0487411	0.0381934	0.0170002	0.0185741	0.0147942	0.0124222	0.014123	0.0235262	0.0565298	0.0180317
4585	a	0.024682	0.0403551	0.0431573	0.0756503	0.0622345	0.075502	0.0304878	0.0122388	0.0190526	0.0107311	0.00775254	0.00503795	0.094238	0.0125899
4594	A	0.0278119	0.0342394	0.0153391	0.0424473	0.0303923	0.0451151	0.0180038	0.00985097	0.0133159	0.0098101	0.00570125	0.00457171	0.0578929	0.0175517
4597	A	0.040066	0.0427011	0.0275989	0.0363588	0.0288532	0.0518965	0.00557476	0.0127892	0.0107763	0.018314	0.0129909	0.0198555	0.067262	0.00636325
4600	A	0.0220425	0.0168437	0.0294171	0.0216902	0.0261137	0.049854	0.0476671	0.0330185	0.0302297	0.0406447	0.0320517	0.0331032	0.0626651	0.0226453
4602	A	0.0468739	0.0364469	0.0408405	0.0468392	0.0178852	0.0642967	0.0275893	0.0437236	0.0392252	0.029034	0.0186318	0.0284019	0.0617624	0.0176639
4605	A	0.0530134	0.0382798	0.0415276	0.0694409	0.0338103	0.056887	0.0413282	0.035016	0.046119	0.0280344	0.0250143	0.0153744	0.0857921	0.0273504
4606	A	0.055715	0.0408115	0.0442851	0.0320821	0.0313287	0.0669188	0.0411248	0.0290196	0.0458754	0.033463	0.0292355	0.0373204	0.085407	0.0306247
4611	A	0.0326332	0.0420584	0.0571584	0.0429499	0.0314136	0.0392239	0.0649641	0.0513668	0.0492578	0.0451485	0.0266472	0.0804721	0.0653705	0.0714975
4617	A	0.0218318	0.0231042	0.0174202	0.037431	0.020485	0.0430293	0.0120178	0.00690398	0.00795851	0.00781219	0.0097051	0.0246002	0.0314305	0.00805828
4619	A	0.0115899	0.0134207	0.0174903	0.0140722	0.0137195	0.0229745	0.00536128	0.0207981	0.0106637	0.0065433	0.00974523	0.00821706	0.0152389	0.00807767
4621	A	0.0117451	0.0235201	0.0109469	0.00634196	0.0140266	0.024991	0.0095299	0.00565299	0.010878	0.00797713	0.00710318	0.00833167	0.0378995	0.00817835
4630	A	0.263536	0.388398	0.698122	0.271515	0.611091	0.141196	0.037992	0.0550379	0.0628188	0.0438789	0.0459016	0.0251004	0.201555	0.00925826
4643	A	0.0732277	0.0793081	0.0618528	0.0837018	0.106962	0.156211	0.040552	0.0469219	0.0444485	0.0448868	0.0423509	0.042811	0.141506	0.0465475
4646	A	0.0459657	0.053304	0.0535496	0.0491236	0.059126	0.117654	0.0424674	0.0379296	0.0619522	0.0340417	0.0388016	0.0449333	0.098476	0.0310255
4650	A	0.0509391	0.06386	0.0904006	0.0886839	0.10594	0.183869	0.0893524	0.0706618	0.0854712	0.0947842	0.0999001	0.1044	0.220845	0.0545382
4651	A	0.100053	0.108507	0.112811	0.118132	0.152968	0.190532	0.0545011	0.0819058	0.0807341	0.0562181	0.0737306	0.0836951	0.288112	0.0480852
4659	A	0.244901	0.240715	0.217317	0.303326	0.297043	0.370683	0.110062	0.0854548	0.0986572	0.113507	0.0950637	0.107892	0.338938	0.106396
4660	A	0.119935	0.108043	0.117469	0.191929	0.246517	0.231236	0.0871519	0.106268	0.102479	0.0767491	0.113271	0.0821262	0.219626	0.0315623
4664	A	0.0714884	0.0615683	0.0680585	0.1189	0.112436	0.107057	0.0538823	0.0459687	0.0603005	0.0309236	0.0462094	0.0484907	0.102749	0.0431275
4667	A	0.0206011	0.02618	0.0200341	0.0475202	0.0254766	0.0491789	0.0555016	0.047619	0.0579807	0.0269787	0.0477823	0.0397662	0.0534704	0.0557474
4676	A	0.0269307	0.0141311	0.0258795	0.0314404	0.0324165	0.0386487	0.0446311	0.0499967	0.0798249	0.0392874	0.042611	0.0858689	0.0312194	0.043076
4679	A	0.0304118	0.0393146	0.0525977	0.0546283	0.0326853	0.0267675	0.0379113	0.0431839	0.119502	0.0352886	0.0643525	0.040262	0.0381565	0.0327402
4682	A	0.0270909	0.0201429	0.0303894	0.0449421	0.0308747	0.0367561	0.0513334	0.0513733	0.0556277	0.0547695	0.0433707	0.0504286	0.0585528	0.0293609
4686	A	0.0476718	0.0350956	0.0471717	0.0513247	0.0439604	0.0608065	0.0853118	0.0717386	0.0933199	0.0781199	0.0951392	0.107098	0.0834904	0.0632892
4687	A	0.061517	0.0437145	0.0348937	0.0617665	0.0479684	0.0518949	0.0911577	0.0835553	0.121378	0.0963328	0.0812958	0.116469	0.0619265	0.0600074
4695	A	0.0350145	0.0249066	0.0308005	0.0307286	0.0220833	0.0414079	0.0903104	0.0721491	0.111044	0.0621853	0.0862429	0.0931205	0.0404404	0.0662142
4696	A	0.0377733	0.0447789	0.0227248	0.0342898	0.0371885	0.042776	0.0152401	0.0244051	0.0365049	0.0166508	0.0349815	0.0398707	0.0611486	0.0362206
4700	A	0.015407	0.012448	0.0133756	0.0180861	0.0150353	0.0295068	0.0225665	0.0272674	0.0236951	0.0117378	0.0192362	0.00963471	0.0353723	0.00486744
4702	A	0.0270117	0.0214644	0.0122031	0.0128591	0.0263001	0.0494782	0.0380587	0.0718679	0.0811127	0.0580383	0.0600633	0.0278805	0.0308481	0.0296116
4703	A	0.0241111	0.0289862	0.023019	0.0256509	0.034518	0.043358	0.019705	0.0207437	0.039311	0.0235442	0.0341983	0.0190554	0.0440947	0.0191042
4712	A	0.100867	0.106911	0.11955	0.0775494	0.165899	0.16198	0.0902208	0.10624	0.158841	0.0625465	0.136824	0.126086	0.101267	0.132582
4718	A	0.115948	0.132281	0.113115	0.173625	0.126145	0.16314	0.0939378	0.0647693	0.0791061	0.118141	0.0817991	0.0820524	0.185371	0.0677216
4719	A	0.072466	0.0792305	0.065706	0.0988441	0.0771628	0.0925986	0.0742486	0.0707669	0.0503282	0.0776513	0.0853456	0.0613648	0.127205	0.0409991
4722	A	0.0346255	0.0522064	0.047096	0.0701454	0.0707307	0.0421667	0.0336108	0.0320685	0.0443567	0.0303361	0.0330268	0.0363855	0.0895377	0.0400862
4724	A	0.0981238	0.0982573	0.1207	0.107529	0.130418	0.121032	0.19172	0.254587	0.24423	0.260516	0.205436	0.205068	0.185747	0.162806
4729	A	0.132891	0.157679	0.207257	0.169028	0.180314	0.24811	0.245421	0.276632	0.215284	0.293862	0.206123	0.199626	0.218619	0.163399
4739	A	0.0386029	0.0393688	0.037916	0.0307848	0.0666374	0.0611947	0.0649693	0.0549878	0.0488298	0.0319618	0.0553062	0.0523614	0.0932067	0.0850324
4757	A	0.0142701	0.0166296	0.0186365	0.0247443	0.0187785	0.0495243	0.0220258	0.0327488	0.0469655	0.0161241	0.0298647	0.03311	0.0568857	0.0348106
4759	A	0.0302293	0.0318582	0.0272197	0.0331201	0.0420503	0.0586211	0.0629279	0.0546863	0.127548	0.0474747	0.108555	0.177413	0.0654494	0.0994497
4805	A	0.26179	0.34009	0.331087	0.324532	0.255817	0.364829	0.155425	0.108742	0.187016	0.155916	0.140603	0.181402	0.514353	0.115444
4825	A	0.0843277	0.0499405	0.0831152	0.0863978	0.0754401	0.0597761	0.12908	0.0919379	0.136604	0.135759	0.113902	0.123349	0.104062	0.147999
4852	A	0.233377	0.262848	0.229683	0.219831	0.152885	0.247337	0.122408	0.182843	0.176859	0.148219	0.164127	0.223714	0.390673	0.239392
4869	A	0.0324704	0.0195815	0.0710038	0.04535	0.0592903	0.0483304	0.0812317	0.0981082	0.141908	0.0862304	0.106416	0.0771267	0.0461702	0.0916494
4887	A	0.0273691	0.0382247	0.0903815	0.0420389	0.0646974	0.0855356	0.0374924	0.0468512	0.0533654	0.0383124	0.0433719	0.0291585	0.112875	0.0467877
4888	A	0.0295314	0.0190038	0.0473462	0.0498936	0.047891	0.0301018	0.0598837	0.0496515	0.059029	0.0266028	0.0390924	0.0283897	0.0446611	0.040886
4889	A	0.0296553	0.0253812	0.059201	0.0582057	0.0478135	0.0531208	0.103772	0.0891638	0.130536	0.0597596	0.144874	0.0940433	0.0898489	0.0528961
4904	A	0.0431398	0.073684	0.0881958	0.0448008	0.0662565	0.0846262	0.139397	0.154099	0.170003	0.113269	0.148816	0.249866	0.214675	0.165573
4905	A	0.0249109	0.0139887	0.021353	0.0116004	0.0137463	0.0208818	0.0330756	0.0206769	0.0453236	0.0212258	0.0387331	0.0425358	0.0262046	0.0523814
4906	A	0.0114839	0.0296038	0.011585	0.020905	0.0227929	0.0165938	0.072376	0.0857007	0.112392	0.0460063	0.0907023	0.0834042	0.0416134	0.0873464
4929	A	0.0901589	0.0652351	0.067192	0.107215	0.11003	0.136407	0.0687577	0.0759255	0.0799819	0.0467215	0.0891611	0.0915763	0.158451	0.0448747
4933	A	0.126163	0.13977	0.178307	0.16102	0.20759	0.232088	0.279717	0.285416	0.296687	0.191414	0.24924	0.275036	0.23463	0.202974
4938	A	0.154262	0.185204	0.16724	0.150343	0.19392	0.304102	0.103448	0.135588	0.112908	0.0583308	0.100394	0.129175	0.269229	0.0926239
4950	A	0.0396122	0.0453592	0.0501379	0.0501147	0.0459851	0.0785162	0.0988825	0.0753012	0.0784894	0.0562588	0.0839533	0.078202	0.0957141	0.0328059
4951	A	0.0799082	0.0651102	0.0847615	0.0955899	0.101287	0.0668369	0.073952	0.0952741	0.0785523	0.050019	0.0782328	0.0657965	0.130967	0.045073
4961	A	0.062039	0.0610462	0.0872847	0.0757973	0.0958343	0.103423	0.0262798	0.0307141	0.0676512	0.026874	0.022428	0.0261566	0.10879	0.0208633
4962	A	0.067423	0.0766528	0.112255	0.0589657	0.117618	0.128845	0.014195	0.0155508	0.0502925	0.0116741	0.029245	0.0246279	0.137862	0.0147866
4963	A	0.100432	0.0877024	0.127376	0.0947446	0.110185	0.134189	0.0373307	0.0397883	0.07219	0.0527385	0.0456346	0.0635302	0.160853	0.0593535
4966	A	0.103159	0.0317842	0.0696612	0.0591477	0.089922	0.0896448	0.246278	0.296278	0.322901	0.202628	0.248429	0.183442	0.107527	0.120219
4972	A	0.0651446	0.0557217	0.0968423	0.0736863	0.107226	0.0834189	0.203546	0.264943	0.264909	0.181147	0.184414	0.155999	0.0985222	0.118996
4974	A	0.401038	0.368876	0.614838	0.371721	0.536649	0.424874	0.254762	0.258721	0.259185	0.165112	0.224424	0.160746	0.401149	0.0594052
4977	A	0.355395	0.420224	0.697251	0.599377	0.833142	0.524843	0.157685	0.139852	0.159065	0.156061	0.126477	0.0998868	0.724392	0.0954907
5002	A	0.0724533	0.0802627	0.0755731	0.0959191	0.106352	0.102854	0.20489	0.213575	0.209025	0.133536	0.210324	0.118893	0.116401	0.0597051
5006	A	0.112875	0.106213	0.0433351	0.0726019	0.162949	0.127947	0.130924	0.136593	0.130597	0.0783622	0.143709	0.0875708	0.140065	0.0594661
5009	A	0.0705882	0.0786968	0.0538213	0.133181	0.0857265	0.299083	0.194594	0.253215	0.217391	0.260327	0.197941	0.146663	0.217544	0.144452
5011	A	0.123971	0.079759	0.127115	0.152489	0.122339	0.0916905	0.0713776	0.0509806	0.0791614	0.0627886	0.0660086	0.0358727	0.151527	0.0319364
5014	A	0.215186	0.0819588	0.162549	0.216726	0.198104	0.337965	0.0718932	0.078703	0.0597982	0.0980469	0.107117	0.114136	0.275192	0.0806363
5029	A	0	0	0	0.0326477	0.0349711	0.0617761	0.0345594	0.0090151	0.0211685	0.0177588	0.00898796	0.0313115	0.0497265	0.0248336
5033	A	0.0137741	0.0270563	0.0282686	0	0.0185943	0.0955262	0.0103359	0.014179	0.0146231	0	0.00934361	0	0	0.0205055
5037	A	0.174902	0.1573	0.194903	0.217155	0.336634	0.0512558	0.0757658	0.0737971	0.0640784	0.0390371	0.0433944	0.018867	0.0769231	0.021488
5038	A	0.146951	0.274606	0.197029	0.0914077	0.160289	0.103609	0.0489343	0.108733	0.0794101	0.0982125	0.0532353	0.0141837	0.044238	0.0377644
5039	A	0.241364	0.191825	0.186858	0.0933184	0.225919	0.210896	0.049732	0.0502361	0.0535885	0.00666445	0.0637849	0.00953925	0.168824	0.0109439
5043	A	0.532319	0.540958	1.17143	0.536108	1.35449	1.01729	0.516196	0.529162	0.470395	0.38059	0.401198	0.241597	0.956098	0.18266
5051	A	1.18694	2.50737	3.3237	4	2.21402	1.9174	0.246165	0.176367	0.285956	0.235911	0.310827	0.208835	2.29612	0.246046
5053	A	0.607287	1.04603	1.93798	1.38504	0.25974	0.743494	0.0890736	0.124595	0.161005	0.0426803	0.238663	0.167344	1.22449	0.0268025
5055	A	0.422833	0.222222	0.410678	0.60423	0.273224	0.972763	0.832819	1.09318	0.838785	1.07047	0.913368	1.46221	0.85197	0.777346
5056	A	0.220751	0.229358	0.635593	0.316456	0.558659	0.207039	1.92794	1.97228	1.40483	1.75115	1.84502	1.75303	0.674157	1.13802

## Sheet: A>G
28s location	forward strand reference base	WT NaBH4 2-NH2-d-ATP HIV	75% WT NaBH4 2-NH2-d-ATP HIV	50% WT NaBH4 2-NH2-d-ATP HIV	25% WT NaBH4 2-NH2-d-ATP HIV	WT untreated 2-NH2-d-ATP HIV	WT untreated dNTPs HIV	WT NaBH4 d2-NH2-d-ATP SSIV	75% WT NaBH4 dNH2-ATP SSIV	50% WT NaBH4 2-NH2-d-ATP SSIV	25% WT NaBH4 2-NH2-d-ATP SSIV	WT untreated 2-NH2-d-ATP SSIV	WT untreated dNTPs SSIV	WT NaBH4 dNTPs HIV	WT NaBH4 dNTPs SSIV
5	A	8.61266	9.47051	8.90708	11.5806	9.10853	6.56934	8.26193	9.889	10.7117	7.16639	9.74239	8.80157	5.8024	7.92453
10	A	1.72474	2.4662	1.86747	3.05325	2.24695	2.00634	0.937219	0.990525	0.704663	1.10168	0.8	0.668431	1.09994	0.438596
12	A	0.596546	0.93889	0.994475	1.00415	0.982555	1.27777	0.361608	0.374079	0.235664	0.397168	0.486242	0.417006	0.876254	0.258009
15	A	0.425618	0.753851	0.932126	1.1875	0.884293	1.84777	0.240132	0.26439	0.219341	0.288953	0.286299	0.259108	1.1956	0.248057
17	A	0.540014	0.666087	0.622504	0.912025	0.786761	1.14553	0.244875	0.197239	0.348044	0.162009	0.215733	0.352482	0.798369	0.227826
25	A	0.265747	0.296491	0.298725	0.458121	0.309571	0.619587	0.491191	0.53373	0.906055	0.337463	0.56113	0.85303	0.702754	0.524605
33	A	0.0582298	0.0813568	0.0865755	0.0944347	0.104082	0.0992576	0.138007	0.212354	0.207938	0.146365	0.229488	0.085531	0.10522	0.104179
34	A	0.0377444	0.0425222	0.0408215	0.0611733	0.0337942	0.0979026	0.0269137	0.0364083	0.0304629	0.0231904	0.0226222	0.0221049	0.104371	0.0230541
38	A	0.0404204	0.0583815	0.0307889	0.045231	0.049793	0.0793193	0.0985428	0.134063	0.146092	0.0888028	0.142437	0.0320427	0.0849939	0.0278288
39	A	0.073586	0.0482496	0.0471645	0.0509261	0.0746622	0.144718	0.15089	0.169239	0.192829	0.07475	0.182586	0.106935	0.203221	0.0818532
42	A	0.0338721	0.046442	0.0280215	0.0773017	0.0645655	0.0940039	0.032889	0.0568917	0.0541072	0.0321942	0.0440335	0.0547618	0.0916563	0.0394695
44	A	0.044208	0.0470834	0.0358612	0.0831423	0.0490734	0.087945	0.0206705	0.0286276	0.0278044	0.0167673	0.0534279	0.0263145	0.0633185	0.017595
47	A	0.114461	0.12856	0.0921794	0.221973	0.127318	0.205273	0.0838848	0.0587455	0.0579918	0.10215	0.0848069	0.0589957	0.196822	0.029853
51	A	0.607889	0.623774	0.395408	1.05193	0.549121	0.598272	0.386128	0.451676	0.413031	0.476612	0.498824	0.557389	0.74212	0.3862
56	A	1.33636	1.22726	0.943644	2.27204	1.40206	1.4224	1.25108	1.43425	1.58448	1.1501	1.50691	2.27673	1.19902	1.67193
59	A	0.437788	0.484704	0.485384	0.804629	0.582425	0.781607	0.271393	0.31731	0.377849	0.330833	0.364809	0.212963	0.80573	0.191749
61	A	0.74961	0.84981	0.579164	1.6415	0.843829	0.539631	0.445714	0.399482	0.351712	0.506479	0.37805	0.291406	0.912902	0.397516
62	A	0.272676	0.329982	0.210046	0.555069	0.373318	0.300914	0.117759	0.124903	0.117667	0.128005	0.110846	0.116299	0.432177	0.107517
64	A	0.296896	0.364917	0.277157	0.708285	0.356063	0.476661	0.130564	0.176932	0.136033	0.133019	0.19693	0.0989082	0.794475	0.118355
65	A	0.0877515	0.114101	0.0950769	0.213119	0.158473	0.154785	0.0530659	0.0601579	0.0777363	0.0589923	0.0700378	0.0521098	0.191371	0.0583233
66	A	0.0745209	0.0913699	0.0836807	0.158596	0.0833404	0.164291	0.0399875	0.0479747	0.0431783	0.0346648	0.0488293	0.0382825	0.193296	0.026992
69	A	0.0468417	0.084316	0.0917874	0.0962121	0.111569	0.177586	0.049994	0.0642065	0.100938	0.0772251	0.0981445	0.0447873	0.272329	0.0338735
70	A	0.122323	0.135612	0.178004	0.202038	0.192697	0.264129	0.245837	0.327756	0.444464	0.199134	0.329849	0.205265	0.404805	0.137413
73	A	0.0772465	0.108648	0.100979	0.118589	0.144718	0.23162	0.193851	0.206401	0.273455	0.1644	0.198364	0.140049	0.384524	0.223936
76	A	0.0762851	0.0937037	0.0866346	0.12862	0.110574	0.322856	0.152747	0.179563	0.177382	0.118839	0.163098	0.183217	0.439451	0.19017
84	A	0.111069	0.0748165	0.0495655	0.116659	0.143817	0.149541	0.076406	0.0669135	0.0737319	0.0693508	0.0779577	0.0653069	0.112362	0.0760508
87	A	0.0816155	0.0740997	0.0604857	0.101904	0.10509	0.105611	0.0629911	0.0480527	0.0625687	0.0421677	0.0613087	0.0425825	0.0919822	0.0270592
88	A	0.0893996	0.0915449	0.0839378	0.134278	0.117209	0.0974226	0.057892	0.0692593	0.0553506	0.0442956	0.0482371	0.0555921	0.134784	0.046302
94	A	0.375413	0.399785	0.362536	0.503639	0.496389	0.445377	0.270748	0.325196	0.525738	0.203553	0.34399	0.401601	0.463643	0.326712
98	A	0.158115	0.148378	0.133769	0.287738	0.173133	0.18403	0.0776767	0.125704	0.130556	0.093517	0.125331	0.112025	0.211157	0.0665543
99	A	0.141261	0.172215	0.174706	0.208386	0.160514	0.206898	0.101626	0.132912	0.147315	0.138055	0.131595	0.102642	0.255832	0.0855615
101	A	0.195983	0.223644	0.221587	0.310577	0.292897	0.262233	0.300552	0.313223	0.353175	0.322926	0.3199	0.3077	0.380474	0.357871
105	A	0.207519	0.249474	0.211275	0.357241	0.328741	0.249108	0.253502	0.337427	0.34541	0.247229	0.351441	0.319603	0.303364	0.290124
106	A	0.0544719	0.0626648	0.0773119	0.101876	0.0888901	0.0945922	0.070144	0.0908822	0.10013	0.0573274	0.0745768	0.0657611	0.116338	0.0706361
108	A	0.0470583	0.0572764	0.0448541	0.0755632	0.073105	0.0710063	0.0717534	0.0934086	0.095652	0.0768273	0.099399	0.091872	0.101471	0.0575022
113	A	0.102593	0.115196	0.104154	0.133804	0.144136	0.130958	0.21175	0.272363	0.282873	0.227894	0.261209	0.247527	0.177243	0.231818
120	A	0.0474163	0.0440067	0.0518833	0.0545689	0.0412087	0.058072	0.133372	0.157701	0.197423	0.123712	0.154259	0.125804	0.0979653	0.114048
121	A	0.0382246	0.0330328	0.0346485	0.0602629	0.0262294	0.0718534	0.0657774	0.0826109	0.0870189	0.0598745	0.051725	0.0558056	0.104892	0.0724132
147	A	0.0510556	0.0648552	0.0633865	0.116248	0.0788264	0.112263	0.0586452	0.0691709	0.0949578	0.0479023	0.0523126	0.0459657	0.107389	0.047271
149	A	0.0220533	0.0374064	0.0220794	0.0335674	0.0505141	0.0341518	0.0320221	0.0375023	0.0408442	0.0161029	0.0328592	0.0432349	0.0340275	0.0337927
158	A	0.0290065	0.042016	0.04285	0.0592447	0.0456973	0.0717178	0.0742044	0.0945134	0.0999074	0.056969	0.0620651	0.0422184	0.0779516	0.0384239
162	A	0.0362881	0.0408705	0.0429492	0.0534288	0.0261864	0.0557718	0.0755122	0.0701204	0.0673174	0.071239	0.0766413	0.0537217	0.0987796	0.0378953
163	A	0.0982769	0.0922403	0.0992383	0.0872063	0.0525276	0.0520181	0.15745	0.144443	0.154127	0.127962	0.10495	0.0864016	0.0927756	0.0932728
165	A	1.01131	0.89837	0.896028	0.977586	0.604518	0.624488	0.256602	0.248478	0.250614	0.265606	0.170013	0.150288	0.781337	0.15672
197	A	0.0859423	0.109916	0.106913	0.109444	0.14216	0.0917074	0.468966	0.500179	0.421445	0.474303	0.479565	0.524254	0.135803	0.522484
198	A	0.0512442	0.0805485	0.075099	0.0609385	0.0805452	0.0940626	0.20254	0.188525	0.212602	0.186989	0.175666	0.219589	0.0920744	0.188792
208	A	0.126557	0.126937	0.119739	0.159593	0.199539	0.130233	0.0822222	0.121755	0.128881	0.0738478	0.100402	0.0752883	0.148482	0.0929842
212	A	0.303913	0.256331	0.278597	0.331359	0.338126	0.27152	0.501472	0.545049	0.85263	0.431887	0.621152	0.758715	0.281992	0.428146
218	A	0.518265	0.463514	0.275931	0.542269	0.342954	0.329603	0.930922	0.974456	1.18865	0.720841	1.00796	1.17254	0.291718	0.900367
227	A	1.23427	1.25948	1.00234	1.33608	1.13907	0.815507	0.396853	0.482902	0.604162	0.365908	0.473081	0.572208	0.574404	0.390008
235	A	0.137094	0.092909	0.118867	0.202538	0.116654	0.134941	0.121585	0.158892	0.22973	0.0975393	0.119928	0.138635	0.140952	0.161555
243	A	0.120849	0.119869	0.10334	0.166044	0.0872745	0.116763	0.0941202	0.0871096	0.125273	0.0924803	0.100155	0.135083	0.0909295	0.106239
279	A	0.348928	0.363319	0.362369	0.388584	0.26151	0.291558	0.47678	0.500269	0.681444	0.314984	0.554957	0.375424	0.484221	0.30332
295	A	0.0838852	0.0736761	0.0731906	0.0970901	0.0555783	0.0866214	0.0733416	0.0684646	0.0793208	0.0620412	0.0616059	0.065783	0.103682	0.106697
296	A	0.100588	0.107222	0.0978294	0.128912	0.0744371	0.0996654	0.0639011	0.0547448	0.0703174	0.0441969	0.0708215	0.0859511	0.155105	0.0774225
300	A	0.084946	0.0984047	0.0823274	0.126409	0.0911133	0.0447361	0.157466	0.179738	0.155597	0.162295	0.171407	0.130088	0.0608538	0.0900233
305	A	0.0816363	0.0936019	0.0763022	0.0890269	0.103943	0.0911292	0.0902767	0.125912	0.133844	0.0666262	0.114132	0.113688	0.0791886	0.0836266
306	A	0.0899321	0.0914616	0.0682991	0.112226	0.0992428	0.0914467	0.0997778	0.132966	0.141947	0.0962635	0.0985559	0.102142	0.110517	0.0558221
307	A	0.220731	0.252812	0.200395	0.296865	0.169683	0.381044	0.0385633	0.0726266	0.0716575	0.0547548	0.0657152	0.0852928	0.406816	0.0749207
317	A	0.0550202	0.0599324	0.0499632	0.0945779	0.0724595	0.0881134	0.043841	0.0413303	0.0474759	0.0550222	0.0495555	0.0365599	0.0784304	0.0460128
318	A	0.0469362	0.0409941	0.029999	0.0618988	0.0439914	0.0823153	0.035987	0.0290123	0.0489347	0.0348731	0.0292329	0.0191835	0.0738585	0.0301713
319	A	0.0464249	0.0737589	0.0579472	0.100273	0.059541	0.0854633	0.0307191	0.0318308	0.0371969	0.0261936	0.0322042	0.0261995	0.0943868	0.0107001
324	A	0.0783203	0.0903425	0.079814	0.0922752	0.0989976	0.104986	0.344195	0.356768	0.42438	0.258243	0.358176	0.379453	0.0922613	0.343998
328	A	0.0644361	0.0632783	0.0775678	0.0643946	0.0839828	0.0784824	0.301104	0.395964	0.408737	0.222355	0.328468	0.1672	0.0984971	0.112396
329	A	0.097067	0.0941597	0.0949174	0.0820661	0.108638	0.0983627	0.229358	0.262309	0.303571	0.183142	0.208129	0.20247	0.0919528	0.171114
334	A	0.124443	0.166279	0.178977	0.127119	0.178145	0.149954	0.488805	0.552606	0.644883	0.396254	0.581994	0.583741	0.168511	0.3554
335	A	0.0626583	0.0726191	0.0679845	0.076355	0.0864288	0.095725	0.207209	0.262288	0.288969	0.181618	0.262625	0.255838	0.14379	0.165549
336	A	0.0516634	0.0468005	0.0451396	0.0699728	0.0494894	0.0908443	0.0438917	0.0465124	0.0560234	0.0455842	0.0313116	0.0284613	0.109838	0.0474471
338	A	0.584617	0.706057	0.959709	0.628931	1.10795	0.573332	0.597848	0.549274	0.532238	0.442088	0.576484	0.405053	0.668927	0.348007
344	A	1.81462	1.95162	2.42133	1.80366	3.22824	3.32491	0.734471	0.881926	0.747033	0.73272	0.916603	0.82221	1.6523	0.597047
347	A	0.110663	0.152685	0.156889	0.168966	0.238502	0.42148	0.179377	0.224137	0.223173	0.140063	0.171004	0.143058	0.328982	0.127488
349	A	0.15562	0.167403	0.195422	0.193294	0.280138	0.399117	0.268092	0.376233	0.348833	0.273781	0.34965	0.362976	0.34085	0.240568
353	A	0.108776	0.119107	0.108662	0.134953	0.221143	0.215701	0.679863	0.690684	0.801651	0.505452	0.779576	0.884576	0.256447	0.571212
355	A	0.0573029	0.0773273	0.0673393	0.0895316	0.109924	0.148474	0.508441	0.493124	0.518272	0.413877	0.617385	0.794823	0.148722	0.488787
359	A	0.0343586	0.0344949	0.0252424	0.0400272	0.0696543	0.0919677	0.163345	0.146537	0.233968	0.123258	0.29208	0.230244	0.0630293	0.143879
360	A	0.0476523	0.0379682	0.0296008	0.0614077	0.0680015	0.0837797	0.0998273	0.108317	0.121194	0.0803781	0.170061	0.114267	0.0556598	0.0963222
362	A	0.0380322	0.0332303	0.0170023	0.0375037	0.0380084	0.0607642	0.0697837	0.0881727	0.0723494	0.070289	0.0681522	0.101954	0.0360493	0.0423512
363	A	0.0290103	0.0358172	0.0297926	0.0436885	0.0545505	0.0580768	0.0213045	0.0261995	0.0381003	0.0214415	0.0499823	0.030514	0.0489673	0.0359648
366	A	0.0479795	0.0423374	0.024327	0.0638958	0.0631536	0.0621084	0.067472	0.109297	0.124119	0.0405798	0.102476	0.0825468	0.075783	0.0396808
371	A	0.0452004	0.0464343	0.0375295	0.0793626	0.0537057	0.0692636	0.188625	0.197452	0.29085	0.156473	0.27554	0.268611	0.0830026	0.173243
372	A	0.0654989	0.0576892	0.0301532	0.0621022	0.0603663	0.111407	0.235867	0.210486	0.300738	0.21726	0.34357	0.210197	0.0732082	0.225142
376	A	0.038148	0.0294886	0.0278018	0.04305	0.0519606	0.0540428	0.0672899	0.0674845	0.095385	0.055996	0.0946192	0.0735486	0.0417366	0.0524231
377	A	0.0315005	0.0328322	0.0245535	0.051218	0.0455466	0.0731266	0.0285955	0.0509623	0.0504138	0.0426897	0.0428197	0.0331982	0.0511088	0.0309993
378	A	0.0313725	0.03437	0.0275997	0.0428283	0.0326999	0.135572	0.0356136	0.0537466	0.037637	0.0234645	0.03377	0.0567349	0.144139	0.0404601
383	A	0.0333732	0.0247672	0.0277964	0.0388446	0.0467387	0.0533404	0.0246667	0.0501727	0.0588558	0.0381453	0.0408427	0.0273866	0.0526083	0.0279736
384	A	0.0233447	0.0228454	0.0152436	0.0255573	0.0255406	0.0518838	0.0202402	0.0183189	0.0197628	0.0292125	0.0233906	0.0270801	0.0348773	0.0240955
385	A	0.0207711	0.0275201	0.0292421	0.0341031	0.0362349	0.0517763	0.013425	0.0336483	0.0393437	0.0332304	0.0398532	0.0677415	0.0605859	0.0389755
386	A	0.0502208	0.0476957	0.0452971	0.0659964	0.0747808	0.439322	0.0320243	0.0362354	0.0457528	0.0371676	0.0526333	0.149771	0.358955	0.0870129
388	A	0.0341878	0.0266277	0.0241102	0.0416517	0.042125	0.0726101	0.0119329	0.0152401	0.0338718	0.023245	0.0294966	0.0375998	0.0468791	0.0165481
389	A	0.0704967	0.0610756	0.0400076	0.066576	0.0634647	0.117044	0.0369067	0.0496285	0.0414841	0.0394263	0.0765709	0.0925334	0.0812971	0.0457607
395	A	0.475359	0.405384	0.260232	0.615226	0.479486	0.668023	0.189799	0.223307	0.244824	0.25222	0.410818	0.566712	0.356693	0.207024
396	A	0.234145	0.219736	0.217142	0.249713	0.240275	0.25046	0.249916	0.263795	0.290306	0.244346	0.342559	0.404345	0.245772	0.272287
398	a	0.0866962	0.0890697	0.0687096	0.10788	0.131122	0.133035	0.159368	0.169698	0.236594	0.112805	0.253321	0.386791	0.120903	0.147109
400	a	0.0712727	0.0718007	0.0862962	0.0828712	0.0934945	0.123343	0.383901	0.398024	0.550701	0.271865	0.456973	0.350893	0.104395	0.207007
402	A	0.0582495	0.0712542	0.0532481	0.0784965	0.0821452	0.181657	0.243207	0.248851	0.383883	0.221298	0.271155	0.340313	0.135969	0.32186
407	A	0.514098	0.42468	0.312574	0.75866	0.578572	0.782037	0.212164	0.268776	0.252745	0.232462	0.426465	0.566354	0.512065	0.200008
408	A	0.353071	0.347991	0.413662	0.396884	0.417875	0.502233	0.153626	0.195165	0.192501	0.130501	0.189846	0.257298	0.49668	0.209371
410	A	0.653853	0.64884	0.740344	0.635693	0.804195	0.871576	0.697817	0.665484	0.76695	0.610197	0.614217	0.630068	0.840733	0.475652
418	A	0.517757	0.437907	0.399191	0.796475	0.584806	0.850497	0.227429	0.212175	0.257302	0.260632	0.237521	0.260158	0.71881	0.157695
419	A	0.118554	0.14602	0.161314	0.192972	0.194233	0.358624	0.0670299	0.0704784	0.0824128	0.0579445	0.0752796	0.0503227	0.398488	0.0608785
420	A	0.113142	0.1543	0.142107	0.191214	0.200071	0.342893	0.0685883	0.0492256	0.090197	0.0455804	0.0999589	0.0654507	0.305654	0.0468
426	A	0.0581027	0.0515192	0.0870803	0.108859	0.154532	0.180107	0.52259	0.511249	0.541817	0.380959	0.367193	0.35557	0.137444	0.464426
427	A	0.0908059	0.059867	0.0727654	0.0752797	0.119745	0.130658	0.133153	0.190351	0.201626	0.13329	0.201341	0.152149	0.137454	0.143157
429	A	0.084666	0.0851755	0.0921911	0.122766	0.12656	0.142425	0.108606	0.143382	0.196794	0.117255	0.137303	0.118079	0.0978974	0.106582
433	A	0.187014	0.210899	0.210801	0.229253	0.229056	0.253687	1.08578	1.13761	1.30187	0.983771	0.824061	0.659336	0.404138	0.820949
434	A	0.131098	0.131432	0.119123	0.153959	0.129507	0.273239	0.449809	0.429848	0.521805	0.448775	0.414851	0.385747	0.284469	0.472308
435	A	0.161272	0.160824	0.190493	0.16603	0.176664	0.259374	0.254627	0.267339	0.385841	0.238786	0.247774	0.321746	0.242858	0.23489
452	A	0.188437	0.242944	0.315873	0.221157	0.271261	0.337868	0.660899	0.643822	0.56617	0.633888	0.455469	0.508713	0.421776	0.519888
463	A	0.431613	0.51966	0.743335	0.528151	0.727602	0.492792	0.327773	0.383377	0.495462	0.289747	0.398114	0.330634	0.415774	0.384338
466	A	0.0486592	0.0609035	0.0906166	0.0568421	0.0917023	0.122789	0.0362319	0.0637517	0.0728581	0.0587199	0.0747012	0.0842802	0.133522	0.0628625
470	A	0.0499224	0.0481257	0.0268871	0.0354973	0.0213407	0.0476017	0.125272	0.151573	0.194547	0.125456	0.136859	0.15249	0.0823113	0.161912
471	A	0.114914	0.15245	0.123977	0.17466	0.0884968	0.122449	0.298745	0.316041	0.204755	0.338048	0.136127	0.142154	0.285177	0.38427
509	A	0.0325425	0.0446192	0.0930734	0.039375	0.103789	0.0937494	0.056958	0.0928275	0.111314	0.0418576	0.0787049	0.0982881	0.0793667	0.0692617
535	A	0.123886	0.114851	0.120017	0.18208	0.1447	0.152149	0.2198	0.304891	0.424227	0.232046	0.317336	0.29142	0.17726	0.264335
543	A	0.336662	0.330655	0.345046	0.341574	0.259319	0.22576	0.264142	0.298186	0.412561	0.230894	0.38785	0.3564	0.568767	0.332912
586	A	2.08668	1.5185	1.46444	1.46495	1.25916	1.44181	1.51071	1.67908	2.84348	1.40161	2.65983	2.99177	0.880963	1.93813
649	A	0.234051	0.244922	0.354481	0.299393	0.301331	0.37031	0.0970239	0.16453	0.189822	0.0864659	0.11496	0.187677	0.346197	0.161584
660	A	0.073966	0.0971961	0.0486056	0.0737837	0.0645904	0.0829958	0.0804367	0.151241	0.274392	0.0935659	0.221771	0.259124	0.0988454	0.123272
667	A	0.0992082	0.113308	0.166519	0.150028	0.134351	0.157961	0.303941	0.420243	0.504217	0.247118	0.51971	0.687187	0.138712	0.32334
686	A	0.0446516	0.064212	0.0972578	0.0691969	0.0830939	0.0706398	0.0897154	0.101375	0.132214	0.097783	0.0895536	0.112358	0.0609025	0.1034
692	A	0.0328174	0.0359355	0.068007	0.0302912	0.0630997	0.062196	0.37091	0.417515	0.459105	0.291989	0.343729	0.294189	0.0693442	0.208359
711	A	0.138858	0.132769	0.314903	0.198264	0.295836	0.401325	0.217336	0.225818	0.482494	0.154934	0.376812	0.528441	0.312151	0.278209
723	A	0.453663	0.444469	0.563012	0.664568	0.563599	0.565313	0.399347	0.402137	0.462837	0.413736	0.520568	0.7505	0.592125	0.458878
732	A	0.396447	0.494916	0.825633	0.487673	0.784119	0.802723	0.385974	0.396921	0.538071	0.421652	0.474411	0.531746	0.520977	0.320259
733	A	0.279832	0.425802	0.604963	0.341987	0.550723	0.585908	0.424651	0.449931	0.473362	0.356458	0.452183	0.41096	0.435936	0.354902
746	A	0.355474	0.36301	0.42393	0.369869	0.461618	0.516771	0.329642	0.353074	0.423691	0.310977	0.361576	0.422551	0.428653	0.372158
747	A	0.240672	0.237567	0.284683	0.216057	0.263362	0.314731	0.316616	0.355359	0.295927	0.350995	0.339209	0.389543	0.33164	0.430119
832	A	0.201925	0.337063	0.240278	0.330832	0.349839	0.305013	0.153401	0.163822	0.237055	0.223902	0.349186	0.42192	0.239306	0.174527
887	A	0.515175	0.57699	0.588587	0.54436	0.62745	0.675907	1.37664	1.22661	1.4732	1.1451	1.87144	1.49797	0.891999	1.22831
891	A	0.150932	0.125661	0.16032	0.161685	0.203119	0.122861	0.185078	0.195809	0.235256	0.209058	0.284323	0.198163	0.172878	0.195182
892	A	0.0621084	0.0604086	0.0988688	0.0887087	0.0965891	0.106166	0.200868	0.265725	0.326781	0.200081	0.286578	0.261673	0.115949	0.170142
893	A	0.0475903	0.0459027	0.066902	0.0676576	0.0607577	0.11007	0.121451	0.200365	0.258341	0.126501	0.208614	0.2003	0.131101	0.157563
903	A	0.0252694	0.0395591	0.0405597	0.0397906	0.0438356	0.0636065	0.119405	0.13009	0.206635	0.0901725	0.190919	0.241913	0.0669222	0.178195
909	A	0.0585218	0.0554184	0.0778878	0.0555875	0.0605327	0.0582013	0.113011	0.120423	0.165251	0.110776	0.130389	0.148693	0.0599309	0.0777213
911	A	0.144887	0.120925	0.097443	0.133897	0.106674	0.0923753	0.199937	0.223345	0.430487	0.168262	0.295343	0.368033	0.126202	0.238646
923	A	0.103531	0.081404	0.0593488	0.109589	0.0827053	0.0716564	0.127205	0.186476	0.225679	0.128302	0.203657	0.298703	0.150487	0.193789
926	A	0.0769231	0.0630206	0.0466392	0.0843748	0.0720751	0.0672922	0.117731	0.136345	0.149254	0.10788	0.155778	0.144971	0.0832759	0.140512
929	A	0.0800012	0.0889327	0.0843423	0.0947734	0.0758144	0.0667491	0.275335	0.333089	0.531036	0.254969	0.377865	0.336126	0.141773	0.25422
937	A	0.296681	0.26455	0.157244	0.270998	0.178692	0.144444	0.36318	0.41502	0.574607	0.317207	0.404421	0.384466	0.211038	0.389992
938	A	0.140693	0.105459	0.102884	0.172145	0.100587	0.157581	0.175097	0.220999	0.24834	0.199395	0.192886	0.183963	0.198471	0.22806
950	A	0.711072	0.590258	0.310853	0.871045	0.282757	0.295727	0.560147	0.539387	0.546917	0.538047	0.537112	0.589768	0.341349	0.626702
954	A	0.298357	0.261908	0.197388	0.403839	0.157291	0.148462	0.168847	0.198329	0.172232	0.160588	0.161096	0.172121	0.185867	0.157038
958	A	0.103987	0.124537	0.0917747	0.133406	0.109946	0.140566	0.199266	0.211696	0.244163	0.190771	0.297486	0.239871	0.186366	0.161663
960	A	0.105209	0.11604	0.128035	0.116526	0.164774	0.213458	0.191096	0.202695	0.211219	0.150863	0.210468	0.254029	0.246509	0.169033
994	A	0.139265	0.173124	0.172446	0.122526	0.171725	0.210216	0.137709	0.196503	0.314105	0.174604	0.205932	0.260122	0.337107	0.174495
1006	A	0.0990164	0.071383	0.13348	0.17344	0.170248	0.1201	0.144906	0.204976	0.233694	0.181473	0.218855	0.237967	0.217965	0.231536
1007	A	0.0201221	0.0152561	0.0176274	0.04828	0.0344234	0.0862738	0.042023	0.0523492	0.0956291	0.0443216	0.0575459	0.0631535	0.0848572	0.0526116
1017	A	0.110454	0.093625	0.148836	0.180215	0.117762	0.150574	0.145452	0.212418	0.158693	0.129741	0.121632	0.158804	0.217114	0.195907
1072	A	0.116236	0.103117	0.223335	0.116383	0.197436	0.211094	1.03957	1.44763	1.52646	0.720088	1.3877	1.15343	0.27991	0.895614
1081	A	0.0893992	0.0892459	0.0786756	0.0923186	0.118076	0.110814	0.150693	0.15596	0.217611	0.0888134	0.148823	0.203557	0.11144	0.162902
1089	A	0.122569	0.0908326	0.101516	0.0979783	0.122484	0.11464	0.153277	0.142117	0.307709	0.09755	0.176887	0.218759	0.120159	0.215042
1100	A	0.5022	0.57446	0.548711	0.659746	0.419363	0.446628	0.700951	0.674926	0.726486	0.509906	0.611558	0.707022	0.737895	0.402851
1130	A	0.331858	0.222352	0.383095	0.303402	0.278278	0.236437	0.285858	0.303665	0.271854	0.302417	0.20878	0.488599	0.80302	0.497015
1169	A	0.0815028	0.131303	0.159236	0.192039	0.105527	0.145079	0.207703	0.177732	0.28641	0.200763	0.182752	0.228798	0.205963	0.275831
1178	A	0.223864	0.190052	0.19519	0.17726	0.208244	0.239169	0.66997	0.80534	0.821186	0.553139	0.772864	0.676985	0.213398	0.41679
1216	A	0.26111	0.347641	0.300176	0.370086	0.310256	0.291077	0.19949	0.263754	0.227008	0.227164	0.262918	0.264657	0.345268	0.328042
1232	A	0.0976688	0.116455	0.105401	0.147122	0.14573	0.147285	0.195958	0.262794	0.289483	0.202852	0.264723	0.24907	0.164252	0.21682
1248	A	0.0641878	0.0782737	0.0794314	0.109672	0.031049	0.0563169	0.111189	0.117	0.146519	0.141937	0.112693	0.118209	0.0702521	0.0987242
1249	A	0.0550143	0.0507421	0.0305474	0.0836601	0.0288319	0.051456	0.0682644	0.0671945	0.066536	0.0676375	0.078609	0.0667357	0.11257	0.0909849
1251	A	0.0573513	0.0718467	0.0509269	0.0759103	0.03986	0.0651982	0.0735903	0.11013	0.0839121	0.0635149	0.0448883	0.0523918	0.071983	0.134011
1257	A	0.151728	0.0929211	0.0937532	0.206703	0.0930068	0.118461	0.0714849	0.0879997	0.0653168	0.0613017	0.0469263	0.0657268	0.138496	0.0629707
1264	A	0.187705	0.147984	0.18625	0.250354	0.106216	0.126994	0.202955	0.194911	0.249544	0.175661	0.227019	0.218778	0.205746	0.176683
1268	A	0.128926	0.155026	0.151292	0.221161	0.0731821	0.16097	0.27069	0.280962	0.2973	0.288745	0.261324	0.273749	0.166578	0.30359
1273	A	0.315457	0.320619	0.326869	0.460269	0.264562	0.314653	0.436953	0.437898	0.447352	0.456471	0.450536	0.504172	0.437736	0.514037
1288	A	0.102995	0.115061	0.0863224	0.108039	0.131436	0.107355	0.123582	0.141665	0.142049	0.151373	0.156032	0.15617	0.135628	0.111657
1297	A	0.30629	0.297494	0.379241	0.270768	0.400823	0.324606	0.441937	0.490453	0.383414	0.337487	0.431856	0.259749	0.24956	0.276031
1301	A	0.121005	0.148395	0.184561	0.147874	0.213364	0.237969	0.52387	0.61692	0.857774	0.479414	0.568515	0.398973	0.236858	0.253273
1306	A	0.200958	0.168331	0.209079	0.181203	0.350725	0.633005	0.481385	0.621143	0.710423	0.386926	0.567383	0.606095	0.428731	0.364656
1316	a	0.893338	0.654573	0.617901	0.856946	1.24717	2.30165	1.69432	1.70155	1.19732	1.72576	3.22094	5.00798	1.08575	2.24086
1317	a	0.172907	0.133636	0.138117	0.162581	0.185109	0.192625	0.0825083	0.134842	0.30404	0.0593619	0.100284	0.108156	0.157129	0.058401
1318	A	0.15649	0.157986	0.247364	0.213139	0.218116	0.358505	0.200375	0.24621	0.328561	0.143985	0.223389	0.203991	0.187994	0.164223
1320	a	0.313427	0.377088	0.400499	0.519941	0.491975	0.412007	0.440996	0.55045	0.887871	0.356098	0.514208	0.401954	0.285762	0.402175
1324	A	0.324069	0.484666	0.431908	0.492167	0.444118	0.404152	0.78613	0.961672	1.93297	0.424168	0.931492	0.935162	0.274301	0.660654
1327	A	0.584625	0.702416	0.716497	0.731004	0.809184	0.926661	0.43204	0.542706	0.670297	0.33862	0.557041	0.75319	0.588511	0.546475
1328	A	0.238752	0.37783	0.339285	0.316307	0.387042	0.424565	0.565935	0.76742	0.949806	0.486855	0.6921	0.759494	0.465369	0.638317
1331	A	0.669925	0.654975	0.536421	0.72909	0.560872	0.56202	1.05121	1.17329	1.14995	0.973115	1.22124	1.04856	0.40026	0.701372
1336	A	0.0715239	0.0852113	0.100913	0.119448	0.0965344	0.161707	0.139097	0.223339	0.202002	0.156231	0.17537	0.216942	0.126333	0.104091
1337	A	0.088466	0.11688	0.128503	0.122496	0.122703	0.173016	0.0775092	0.11587	0.114223	0.0573684	0.107426	0.104537	0.179924	0.0413345
1339	A	0.101922	0.0869895	0.103581	0.12452	0.109097	0.165138	0.0785263	0.0895997	0.0769503	0.0765723	0.110057	0.119546	0.150738	0.0813465
1348	A	0.274603	0.194913	0.15473	0.302794	0.244977	0.328358	0.19828	0.215442	0.266795	0.178818	0.26094	0.44156	0.310951	0.305372
1362	A	0.426467	0.381302	0.332268	0.616842	0.448716	0.415704	0.246447	0.232146	0.239065	0.248402	0.22094	0.217962	0.462181	0.208058
1365	A	0.268454	0.230742	0.217321	0.290245	0.250223	0.326702	0.100402	0.107523	0.130368	0.110993	0.124805	0.135534	0.31387	0.0918118
1366	A	0.208143	0.189533	0.176561	0.219851	0.202479	0.285925	0.0816011	0.074648	0.0772269	0.0744929	0.056671	0.0783228	0.316577	0.0688674
1367	A	0.180807	0.191135	0.166591	0.19248	0.199966	0.335262	0.0636601	0.0726086	0.0796286	0.0752623	0.084703	0.0960365	0.351672	0.112247
1381	A	0.228369	0.178367	0.210997	0.307661	0.213337	0.201145	0.147735	0.159616	0.135238	0.130514	0.159037	0.142164	0.257757	0.135097
1382	A	0.141868	0.112614	0.130816	0.197788	0.151359	0.17149	0.0884094	0.115009	0.092895	0.117117	0.124727	0.115567	0.190284	0.121339
1385	A	0.19598	0.23964	0.298684	0.269238	0.325552	0.206623	0.115272	0.106769	0.106155	0.108701	0.108787	0.107347	0.550272	0.120866
1386	A	0.100474	0.112022	0.111161	0.179988	0.123783	0.0911837	0.113647	0.120468	0.100259	0.114511	0.0985022	0.0997521	0.181117	0.0893637
1391	A	0.150332	0.111706	0.0894901	0.182737	0.0955265	0.0817297	0.148394	0.151527	0.131463	0.13885	0.139145	0.130585	0.141205	0.137671
1392	A	0.0945866	0.109234	0.0995308	0.132037	0.0756732	0.107268	0.108981	0.114683	0.0969766	0.125708	0.0763845	0.072905	0.155562	0.130003
1414	A	0.0766187	0.0698352	0.044142	0.0728505	0.0519322	0.0796554	0.0850885	0.100444	0.114863	0.0856722	0.109685	0.104312	0.0815517	0.0923603
1421	A	0.148199	0.15376	0.133474	0.136022	0.158646	0.134814	0.163203	0.191494	0.216684	0.129457	0.14141	0.142344	0.206722	0.141157
1427	A	0.217283	0.26578	0.236066	0.261378	0.253236	0.261291	0.371608	0.355682	0.299327	0.334508	0.326025	0.256079	0.351236	0.364954
1437	A	0.0350103	0.0582731	0.0325135	0.0448268	0.0501082	0.0581311	0.0649842	0.0493043	0.0425598	0.0479059	0.0502564	0.0554032	0.120671	0.043118
1446	A	0.129149	0.125784	0.139533	0.120934	0.131412	0.192284	0.120588	0.112736	0.127607	0.10335	0.0679582	0.101698	0.207979	0.142282
1453	A	0.0963663	0.0829026	0.126629	0.106818	0.0861164	0.100021	0.109419	0.115714	0.118771	0.110753	0.120723	0.109541	0.147785	0.136032
1456	A	0.0819429	0.0794254	0.0571203	0.0611711	0.0726843	0.0625326	0.0860947	0.111289	0.124231	0.0824999	0.0701035	0.080984	0.0795047	0.0804273
1485	A	0.596453	0.634189	0.681337	0.75788	0.559694	0.540785	0.23716	0.248095	0.278935	0.231838	0.237964	0.267474	0.587821	0.256909
1491	A	0.25716	0.216473	0.257983	0.354146	0.286555	0.276637	0.347933	0.370066	0.484446	0.268044	0.358798	0.405255	0.35297	0.391461
1494	A	0.309043	0.342817	0.31541	0.499165	0.342916	0.31369	0.251689	0.298672	0.338055	0.235164	0.30911	0.290781	0.278979	0.191893
1497	A	0.279431	0.290549	0.245254	0.344441	0.29202	0.280972	0.353827	0.407247	0.402349	0.331538	0.392938	0.373367	0.383434	0.346348
1502	A	0.329285	0.265911	0.260163	0.417153	0.342649	0.324957	0.378751	0.376444	0.476233	0.347155	0.387041	0.417652	0.33961	0.42808
1509	A	0.142411	0.118191	0.118182	0.189479	0.145807	0.156326	0.193587	0.228285	0.236294	0.162151	0.168663	0.162861	0.155758	0.182978
1512	A	0.181124	0.194197	0.17481	0.240895	0.237389	0.19766	0.426301	0.500916	0.484742	0.367694	0.459119	0.41915	0.19634	0.306562
1517	A	0.508259	0.529259	0.420255	0.675688	0.538025	0.561683	1.20205	1.17752	1.15244	1.06311	1.10023	1.26834	0.646073	1.17122
1518	a	0.427344	0.393908	0.356335	0.461654	0.416716	0.413509	0.764899	0.820595	0.826531	0.798348	0.753003	0.839595	0.394915	0.796116
1519	A	0.137352	0.13001	0.116792	0.153616	0.171869	0.293251	0.101095	0.129267	0.128457	0.0938956	0.105104	0.16486	0.31001	0.138305
1521	A	0.129138	0.122518	0.158024	0.226064	0.146796	0.131678	0.124676	0.135725	0.222057	0.115251	0.134072	0.115586	0.181545	0.10929
1527	A	0.168063	0.219073	0.189379	0.230033	0.219171	0.116367	0.970883	1.09582	1.17715	0.704083	1.00964	0.723057	0.144492	0.637239
1528	a	0.0818245	0.106391	0.087213	0.137749	0.119313	0.0891287	0.492527	0.4944	0.549953	0.388709	0.474012	0.422145	0.110626	0.335747
1531	A	0.100407	0.10499	0.0791328	0.146185	0.088343	0.0649479	0.116866	0.10738	0.115733	0.111575	0.122146	0.0740637	0.107496	0.0655998
1541	A	0.4914	0.519755	0.398253	0.734028	0.51431	0.414051	0.642629	0.651393	0.749506	0.566033	0.573446	0.679136	0.551114	0.671464
1547	A	0.264753	0.229008	0.232107	0.362431	0.220843	0.185468	0.311961	0.358301	0.414682	0.298212	0.342217	0.376526	0.274861	0.289311
1548	A	0.139152	0.116991	0.0910247	0.1261	0.0998963	0.130582	0.216301	0.232966	0.247189	0.17673	0.240167	0.190858	0.186934	0.18971
1552	A	0.126979	0.115691	0.0772441	0.222347	0.148011	0.0690147	0.161308	0.151657	0.135265	0.107462	0.117658	0.202624	0.100266	0.114564
1554	A	0.113933	0.122192	0.0975046	0.183128	0.116158	0.118542	0.309579	0.250009	0.293278	0.269965	0.247311	0.359489	0.140421	0.275985
1557	A	0.0386263	0.0451891	0.0369307	0.0614761	0.0424795	0.0508058	0.0360352	0.0336345	0.0285439	0.0571031	0.0346589	0.0451221	0.0543316	0.0274056
1558	A	0.0352134	0.0299112	0.0246896	0.0551488	0.0201764	0.0711295	0.0552094	0.0583444	0.0496955	0.0434783	0.0449265	0.0311124	0.0619792	0.0669202
1559	A	0.038926	0.0510002	0.0285975	0.0477205	0.0378857	0.0712833	0.0320946	0.0273545	0.0289532	0.0302396	0.0272632	0.029893	0.081036	0.0261691
1569	A	0.100315	0.106677	0.0935363	0.11914	0.112216	0.116116	0.102058	0.148295	0.165814	0.0848104	0.120047	0.151823	0.123762	0.111863
1577	A	0.0616707	0.0491153	0.0532632	0.082031	0.0805743	0.0935671	0.154767	0.176921	0.23909	0.118266	0.153219	0.14464	0.0992921	0.131067
1587	A	0.0755309	0.0739624	0.0547892	0.0882422	0.0909909	0.0621653	0.447382	0.444421	0.462435	0.326852	0.394182	0.410286	0.0892894	0.288403
1593	A	0.0928793	0.0841714	0.0932265	0.0998484	0.0806822	0.0923213	0.503937	0.455961	0.492139	0.340185	0.440954	0.454093	0.108345	0.373839
1594	A	0.0313197	0.0293681	0.0286695	0.0374563	0.0320549	0.0641357	0.161182	0.16467	0.244968	0.123388	0.143237	0.209963	0.0619945	0.162839
1595	A	0.0302251	0.0458733	0.0377129	0.048694	0.0292429	0.0614293	0.0886938	0.0978822	0.100039	0.0640366	0.0668382	0.0888434	0.071194	0.0742224
1607	A	0.0384845	0.0481967	0.0450441	0.0601217	0.0444278	0.0464189	0.0788526	0.0887506	0.115161	0.0707122	0.0909486	0.106645	0.0590118	0.0720313
1615	A	0.0527158	0.06985	0.0498339	0.0794597	0.0353554	0.0591926	0.242437	0.298278	0.345746	0.216922	0.281001	0.271084	0.076963	0.244971
1617	A	0.621124	0.554178	0.467908	0.627173	0.582214	0.338782	0.410043	0.450279	0.387853	0.425871	0.376088	0.312605	0.424198	0.333282
1624	A	0.23632	0.224517	0.209772	0.337741	0.191346	0.222075	0.492442	0.489819	0.595831	0.428398	0.546201	0.445985	0.264918	0.384492
1625	A	0.099108	0.0933264	0.0826282	0.141628	0.106225	0.142146	0.184867	0.184426	0.179002	0.210144	0.22298	0.195266	0.175014	0.186707
1626	A	0.0483986	0.0894179	0.0487838	0.101924	0.0651854	0.170674	0.09908	0.0972128	0.105701	0.091734	0.113051	0.139872	0.174985	0.153362
1628	A	0.0302626	0.0539122	0.019665	0.0618291	0.0455822	0.0634797	0.0480522	0.0506608	0.0785735	0.0350787	0.0471272	0.0446664	0.0701907	0.040365
1631	A	0.0389089	0.0605127	0.0670316	0.0769437	0.0546025	0.058144	0.197273	0.253504	0.287477	0.167964	0.2058	0.261141	0.0983654	0.216794
1632	A	0.035202	0.0434816	0.0462548	0.0582732	0.0246536	0.0543875	0.126613	0.150488	0.179619	0.127201	0.142629	0.158566	0.0668934	0.11539
1636	A	0.0265149	0.0276702	0.019531	0.0359976	0.0269339	0.0216213	0.115022	0.123553	0.150578	0.105676	0.125069	0.0871958	0.0394997	0.0920511
1637	A	0.0392726	0.0450554	0.0463381	0.0454879	0.0529647	0.083397	0.181949	0.196913	0.224652	0.18332	0.169354	0.160119	0.118162	0.182093
1640	A	0.0322001	0.0329455	0.0296198	0.0184507	0.038753	0.0429358	0.116085	0.124258	0.112674	0.104793	0.123501	0.0799463	0.043033	0.0989048
1644	A	0.0219509	0.0234252	0.0245193	0.0368635	0.0222504	0.0265414	0.0318843	0.0406116	0.0635924	0.0517801	0.0628291	0.04007	0.0271498	0.0372239
1647	A	0.0320297	0.0284819	0.0228428	0.0312793	0.0260794	0.0350796	0.0360294	0.0258514	0.0469217	0.0311132	0.044903	0.0305873	0.0284306	0.0163948
1662	A	0.0528863	0.0436388	0.0592698	0.0425119	0.0536823	0.0738215	0.256437	0.286804	0.340198	0.222424	0.269135	0.184909	0.097072	0.144654
1663	A	0.0468003	0.0383805	0.0437832	0.0522286	0.051264	0.0857688	0.27865	0.32218	0.310666	0.21941	0.29649	0.265415	0.0991701	0.231475
1673	A	0.0853025	0.0573121	0.0836585	0.0781683	0.0678077	0.0374588	0.239597	0.222702	0.271669	0.22584	0.221251	0.158041	0.0543533	0.149373
1676	A	0.028369	0.0229632	0.0270471	0.0231071	0.0182804	0.024398	0.0503467	0.0667996	0.0653388	0.0347773	0.0386933	0.0445149	0.0448493	0.058152
1678	A	0.0227319	0.0296456	0.0325223	0.0330488	0.0235405	0.0370735	0.0330669	0.0624811	0.0453421	0.0305067	0.0318737	0.0260305	0.036817	0.0238684
1693	A	0.135527	0.13457	0.139951	0.14325	0.167451	0.220545	0.224125	0.249493	0.284329	0.223683	0.238626	0.225809	0.191691	0.18937
1695	A	0.158724	0.164135	0.167715	0.227339	0.228815	0.234167	0.202336	0.223746	0.313617	0.155104	0.214917	0.240103	0.267259	0.172817
1700	A	0.548255	0.570646	0.546767	0.608955	0.689768	0.822603	0.866433	0.846106	0.914593	0.636343	0.762834	0.650129	0.972754	0.542013
1704	A	0.776157	0.835267	0.784018	1.14899	1.09925	1.38021	0.483316	0.590844	0.622785	0.38049	0.473142	0.527009	1.82989	0.338579
1713	A	1.02248	1.15469	1.28158	1.30861	1.27281	1.80277	0.233951	0.244727	0.281341	0.169575	0.219987	0.284585	2.12834	0.20735
1717	A	0.292449	0.324234	0.326135	0.461221	0.37168	0.544291	0.164698	0.195002	0.20494	0.157558	0.164825	0.195066	0.691826	0.190359
1723	A	0.477237	0.446271	0.655176	0.553124	0.633643	0.332668	0.0962932	0.103512	0.143402	0.114948	0.109918	0.065071	0.477178	0.059901
1730	A	0.726752	0.595976	0.539348	0.790068	0.627615	0.528855	0.93084	0.965193	0.895779	0.923535	0.978973	0.83052	0.573151	0.722524
1731	A	0.182004	0.183605	0.15845	0.306126	0.253339	0.275867	0.104676	0.110586	0.137879	0.107256	0.0996145	0.150779	0.359216	0.149082
1732	A	0.237165	0.260436	0.26207	0.437236	0.2803	0.91059	0.0444856	0.0564901	0.0669623	0.0466988	0.0461328	0.0942221	0.900332	0.0624507
1736	A	0.154092	0.158514	0.163924	0.297587	0.19023	0.12206	0.409538	0.464698	0.498747	0.388241	0.421447	0.358381	0.241894	0.356283
1737	A	0.175037	0.181195	0.148863	0.340389	0.246285	0.237078	0.469657	0.518383	0.496833	0.452569	0.453325	0.434532	0.351175	0.461212
1740	A	0.101225	0.118912	0.065715	0.157832	0.122911	0.137232	0.0289251	0.0157959	0.0398642	0.0340381	0.0407429	0.0263897	0.184919	0.0296744
1743	A	0.125638	0.112666	0.0941539	0.181258	0.111337	0.164481	0.0989399	0.128013	0.131105	0.101913	0.116689	0.111462	0.25492	0.0885879
1745	A	0.134423	0.140959	0.128049	0.209735	0.1442	0.224336	0.0742675	0.0971652	0.123588	0.118731	0.0749064	0.0581176	0.357606	0.0628868
1759	A	0.271609	0.27603	0.19686	0.426529	0.262232	0.204782	0.551204	0.646188	0.751403	0.528781	0.601417	0.460071	0.436062	0.487132
1760	A	0.117402	0.142662	0.103162	0.228623	0.145793	0.138193	0.249429	0.233106	0.310141	0.223813	0.238566	0.211038	0.289367	0.248103
1761	A	0.0893671	0.103001	0.0983942	0.173889	0.117958	0.149565	0.124238	0.11135	0.12798	0.10984	0.105994	0.10791	0.241142	0.104259
1764	A	0.0410032	0.043676	0.0787137	0.0899758	0.0643556	0.0637037	0.105555	0.100972	0.186086	0.0662036	0.0860006	0.111072	0.0968495	0.0921799
1769	A	0.0334518	0.0559733	0.0446952	0.0539132	0.0412012	0.0494648	0.136505	0.152229	0.220426	0.101631	0.139602	0.119955	0.0577089	0.121766
1770	A	0.0318279	0.0446804	0.0345612	0.0370991	0.0262511	0.0534499	0.0902597	0.0912856	0.153366	0.0883948	0.104467	0.0897525	0.0713295	0.0843114
1774	A	0.0298701	0.017886	0.0139958	0.0255334	0.0241573	0.0215235	0.0693018	0.0881506	0.115061	0.0803234	0.0640761	0.108939	0.0406174	0.105303
1780	A	0.0163851	0.0193888	0.0134514	0.0259468	0.021419	0.0152143	0.0599059	0.0857298	0.0904169	0.071245	0.072898	0.095057	0.0131669	0.080115
1781	A	0.0179407	0.0138443	0.0097112	0.0342437	0.013703	0.023266	0.0469895	0.0628161	0.0733668	0.0466668	0.0517898	0.0343246	0.0336481	0.0368025
1782	A	0.0194999	0.0200718	0.0201651	0.0249076	0.0145588	0.0357993	0.0138936	0.0238454	0.0276843	0.0210138	0.014813	0.0164828	0.035846	0.0165092
1787	A	0.0300486	0.0320837	0.0240676	0.0398732	0.019017	0.0222242	0.0184461	0.0388442	0.0347277	0.0361045	0.0349414	0.0349358	0.0347635	0.0307977
1788	A	0.0318832	0.0210896	0.0333852	0.0507867	0.0253032	0.05177	0.0301463	0.0389463	0.0508145	0.0276413	0.0271208	0.0387219	0.0574374	0.0399375
1789	A	0.0578773	0.0546115	0.0468777	0.0874163	0.0486631	0.0712003	0.125067	0.1599	0.20407	0.104456	0.171052	0.0933042	0.0578737	0.0931088
1795	A	0.0404334	0.0315937	0.0392082	0.0405191	0.0341994	0.0399824	0.372959	0.385314	0.448496	0.283116	0.398344	0.359228	0.065373	0.400447
1796	A	0.0334065	0.0327432	0.0226983	0.0376523	0.0290755	0.0513923	0.104381	0.119459	0.145311	0.105335	0.0988215	0.0634891	0.0796139	0.122116
1798	A	0.0375619	0.0418614	0.0249203	0.0294391	0.0279297	0.0533357	0.0382385	0.0547574	0.0488295	0.0393661	0.0463925	0.041533	0.0484471	0.0314057
1799	A	0.0477368	0.049397	0.034002	0.0554086	0.0259538	0.0542041	0.0636423	0.0465575	0.0578714	0.0547204	0.057012	0.0691547	0.0482552	0.058568
1819	A	0.250215	0.260699	0.213946	0.426972	0.145976	0.11388	0.0758555	0.0843709	0.0846679	0.104318	0.0898295	0.0796427	0.146407	0.0721687
1831	A	0.265162	0.306696	0.317856	0.403764	0.249305	0.225098	0.141686	0.179075	0.159764	0.16126	0.15524	0.112642	0.299577	0.127605
1832	A	0.153883	0.139743	0.135209	0.185777	0.121992	0.140529	0.0630517	0.089971	0.0813639	0.0740463	0.0823825	0.0464386	0.197296	0.0511853
1837	A	0.206843	0.159571	0.179796	0.214936	0.204202	0.215424	0.338494	0.359959	0.414846	0.301476	0.317837	0.337899	0.275998	0.34805
1844	A	0.172558	0.192538	0.197454	0.175271	0.213253	0.227026	0.344256	0.30235	0.363507	0.262616	0.293248	0.315553	0.296021	0.283854
1852	A	0.552402	0.430918	0.417681	0.503052	0.396592	0.544093	0.670755	0.622875	0.527899	0.628102	0.563451	0.514846	0.479202	0.525435
1861	A	0.262431	0.260245	0.319915	0.249343	0.339714	0.150402	0.668853	0.626206	0.621195	0.466068	0.673212	0.417757	0.154614	0.343454
1862	A	0.444845	0.47809	0.522696	0.435843	0.586803	0.230848	0.52137	0.578477	0.56666	0.385273	0.476806	0.393997	0.311847	0.306952
1865	a	0.123962	0.0923846	0.126908	0.100767	0.0937552	0.0988665	0.427908	0.458901	0.507286	0.325428	0.416273	0.306853	0.114158	0.310616
1867	A	0.332258	0.363722	0.35166	0.292219	0.308527	0.253347	0.498726	0.564684	0.548819	0.412771	0.460912	0.342456	0.226831	0.288734
1868	A	0.541538	0.577989	0.55003	0.436292	0.594941	0.332078	0.483816	0.486576	0.482968	0.425644	0.441013	0.304866	0.339393	0.245731
1882	A	0.109291	0.113422	0.0972159	0.163528	0.0839209	0.0968383	0.138486	0.167977	0.187408	0.11504	0.111008	0.129575	0.105109	0.154494
1885	A	0.0397702	0.056029	0.0361068	0.0562095	0.0328614	0.0628793	0.049533	0.0607981	0.058124	0.0457111	0.0497855	0.04104	0.0774172	0.0456279
1886	A	0.0783134	0.0620903	0.0644104	0.0845188	0.0808579	0.10058	0.0968622	0.108986	0.0918357	0.074665	0.108498	0.0888986	0.134817	0.0732553
1890	A	0.132581	0.148966	0.159878	0.178103	0.161916	0.17316	0.37468	0.408081	0.364658	0.431342	0.446832	0.33789	0.214601	0.351412
1891	A	0.186926	0.190575	0.188611	0.188976	0.193228	0.228831	0.471045	0.4541	0.409819	0.45504	0.434375	0.434031	0.263315	0.37875
1901	A	0.040124	0.0366133	0.0539402	0.0775831	0.0449187	0.0564423	0.0392157	0.0438916	0.0443123	0.0310815	0.0403164	0.0326995	0.0672692	0.02201
1902	A	0.0782779	0.0909143	0.100726	0.105886	0.091649	0.112864	0.11197	0.117655	0.155961	0.0927467	0.0821779	0.0681502	0.145769	0.0734831
1911	A	0.0738085	0.0840897	0.0831589	0.0874901	0.103121	0.11263	0.125621	0.167161	0.183281	0.127096	0.144137	0.126844	0.178521	0.11817
1917	A	0.166176	0.160704	0.216058	0.228954	0.200769	0.260212	0.4332	0.458793	0.663186	0.360006	0.473652	0.51849	0.360793	0.451916
1923	A	0.108527	0.124534	0.123836	0.153028	0.165388	0.194993	0.185228	0.184799	0.233227	0.186398	0.199729	0.213025	0.238391	0.188575
1926	A	0.105511	0.127668	0.13329	0.17228	0.172433	0.188571	0.0573238	0.0737988	0.0906429	0.0624839	0.0628523	0.0762534	0.29706	0.0596635
1928	A	0.204634	0.219174	0.216794	0.257484	0.249739	0.357924	0.123684	0.127681	0.181155	0.0969227	0.136311	0.139622	0.404685	0.091238
1933	A	1.43904	1.72287	1.97714	1.47151	1.70836	1.86653	1.13434	1.2216	0.997504	1.11409	1.26839	1.39825	1.5441	1.10518
1935	A	0.330719	0.357397	0.515345	0.393245	0.498753	0.592193	0.167172	0.189289	0.193403	0.133776	0.190958	0.229213	0.777286	0.179409
1936	A	0.102336	0.210348	0.19668	0.223139	0.155046	0.36637	0.0810783	0.0757675	0.0957329	0.076297	0.103722	0.139011	0.467298	0.0943506
1937	A	0.114523	0.145696	0.138684	0.180537	0.189744	0.266263	0.0538753	0.0669679	0.0778777	0.0416889	0.0534595	0.0822088	0.348492	0.0596258
1938	A	0.172525	0.174612	0.175127	0.176802	0.209568	0.375479	0.0456668	0.058691	0.123382	0.0664338	0.0627711	0.18413	0.502652	0.168126
1950	A	0.181596	0.163071	0.187982	0.266644	0.183724	0.138934	0.190122	0.224174	0.231696	0.253585	0.304107	0.114643	0.213734	0.107469
1952	A	0.158965	0.180909	0.185291	0.238246	0.214888	0.139781	0.112355	0.125618	0.14223	0.131619	0.146131	0.0791788	0.160744	0.0429101
1954	A	0.23678	0.19743	0.235945	0.353848	0.209664	0.194506	0.198902	0.233126	0.210331	0.230409	0.349422	0.159028	0.227468	0.12147
1956	A	0.212265	0.252218	0.216567	0.330314	0.214748	0.214669	0.207225	0.25516	0.277923	0.200495	0.279728	0.17339	0.24018	0.161349
1958	A	0.499466	0.589841	0.580979	0.682077	0.461822	0.521089	0.429431	0.391218	0.425154	0.321381	0.467105	0.47523	0.68484	0.326256
1961	A	0.499177	0.540559	0.506061	0.517158	0.494098	0.65855	0.433826	0.511787	0.468192	0.460396	0.559481	0.644369	0.685028	0.587858
1964	A	0.574102	0.548321	0.512975	0.593998	0.569377	0.675874	0.354639	0.373108	0.357176	0.368422	0.451881	0.463147	0.699634	0.326392
1973	A	0.309398	0.361999	0.318555	0.386737	0.24605	0.282351	0.333506	0.375407	0.344348	0.37478	0.385339	0.475156	0.356053	0.427501
1977	A	0.166624	0.213474	0.145382	0.230072	0.19051	0.178402	0.133506	0.164381	0.182549	0.125384	0.160135	0.161068	0.225895	0.147079
1978	A	0.208227	0.189334	0.18226	0.255953	0.161015	0.174818	0.199263	0.214068	0.200285	0.145333	0.220699	0.205686	0.179747	0.185551
1984	A	0.36052	0.349843	0.363691	0.414649	0.304341	0.374757	0.499656	0.542896	0.532903	0.507474	0.569149	0.515802	0.414313	0.471211
1985	A	0.15021	0.119451	0.112207	0.211012	0.122159	0.214733	0.319388	0.30434	0.328199	0.239132	0.32001	0.30559	0.167113	0.278059
1992	A	0.136699	0.12285	0.0978997	0.159842	0.125529	0.130763	0.380751	0.389345	0.34763	0.340616	0.340985	0.374073	0.123328	0.372135
1993	A	0.0843069	0.0985566	0.0866267	0.131759	0.087358	0.128284	0.12077	0.114851	0.103597	0.11268	0.110848	0.164009	0.115146	0.158924
1996	A	0.0784616	0.0787809	0.041341	0.0838899	0.0675188	0.0839468	0.090476	0.0772291	0.0605823	0.0748279	0.0926832	0.0741187	0.0583457	0.0669268
2003	A	0.03889	0.0337209	0.022185	0.0352053	0.0534474	0.0553197	0.0732304	0.0563636	0.0729247	0.0757727	0.083293	0.0547504	0.051884	0.0551727
2004	A	0.0300922	0.0313888	0.0295854	0.0459298	0.0433445	0.0763279	0.0455938	0.0563371	0.0425831	0.0428633	0.0600653	0.0300275	0.0876984	0.0416255
2006	A	0.0272261	0.0313019	0.0269923	0.0429028	0.0420446	0.0267451	0.0667884	0.0638586	0.0743707	0.061658	0.0667624	0.0445519	0.0425014	0.0356056
2007	A	0.0497233	0.0413052	0.0338049	0.0466215	0.0395023	0.0553395	0.0617383	0.0702951	0.0878102	0.041377	0.0538996	0.0524624	0.0611734	0.0410669
2011	A	0.0490478	0.0666896	0.0299616	0.0561482	0.0514425	0.0671261	0.10021	0.100424	0.122172	0.0784189	0.12975	0.0987718	0.0852636	0.0753682
2019	A	0.0666223	0.0712967	0.0675753	0.127744	0.109835	0.134594	0.293058	0.343144	0.359793	0.224606	0.355407	0.216547	0.15619	0.176042
2020	A	0.0612041	0.0614585	0.0912351	0.0896611	0.106146	0.10076	0.255757	0.233622	0.260779	0.240405	0.199	0.188436	0.17335	0.186605
2023	A	0.0487198	0.0451929	0.0300116	0.049247	0.0623478	0.0505586	0.0365785	0.0436779	0.0641662	0.0392503	0.0403806	0.0379633	0.102424	0.0485563
2024	A	0.0836896	0.0703965	0.0759431	0.0925497	0.0880164	0.0905454	0.0630191	0.0828261	0.0734939	0.0646235	0.0685629	0.059886	0.115264	0.0442695
2027	A	0.0697182	0.0684182	0.0764797	0.078216	0.104053	0.0930075	0.160034	0.192639	0.239938	0.120773	0.149617	0.178419	0.100796	0.109586
2034	A	0.0728647	0.0611987	0.0905735	0.10685	0.096242	0.115448	0.177822	0.208776	0.244991	0.147559	0.183035	0.17026	0.22091	0.168883
2035	A	0.04259	0.058452	0.0419733	0.0629059	0.0592879	0.128591	0.0648374	0.0667231	0.0739466	0.0688615	0.0648574	0.0825132	0.115182	0.0752158
2036	A	0.0360866	0.0395281	0.0382597	0.0447613	0.0306157	0.0819071	0.0193605	0.0349963	0.0266202	0.0215547	0.026851	0.0176608	0.0929534	0.0306691
2037	A	0.0767084	0.0844708	0.063677	0.113474	0.0714633	0.105525	0.0999661	0.0923462	0.103293	0.0956043	0.0927671	0.0936944	0.124205	0.111944
2041	A	0.0763112	0.067601	0.0532969	0.0780996	0.105518	0.128282	0.337653	0.415832	0.426003	0.326692	0.328332	0.32861	0.160596	0.339019
2051	A	0.100101	0.108664	0.102095	0.16905	0.157683	0.193466	0.100315	0.0947867	0.143251	0.0842057	0.0879388	0.134085	0.188506	0.104939
2063	A	0.105476	0.0981178	0.115339	0.13871	0.124489	0.139048	0.353839	0.316239	0.306127	0.276898	0.264347	0.294848	0.178889	0.317982
2065	A	0.225679	0.235325	0.246248	0.233256	0.165157	0.229306	0.0935436	0.0961068	0.0859826	0.0873773	0.0674948	0.0850609	0.271659	0.0924729
2082	A	0.181552	0.186508	0.222668	0.241798	0.261531	0.281186	0.164881	0.157059	0.168047	0.147992	0.181034	0.240162	0.152506	0.10356
2087	A	0.146688	0.15045	0.151788	0.178006	0.258128	0.208562	0.261938	0.323713	0.451632	0.246998	0.440796	0.429106	0.152394	0.19038
2089	A	0.151414	0.178925	0.19655	0.158101	0.199041	0.214808	0.195708	0.252492	0.245865	0.159266	0.181487	0.234689	0.164755	0.1986
2094	A	0.39462	0.413409	0.464531	0.429958	0.467205	0.516098	0.785871	0.858086	0.941308	0.694981	0.774547	0.861071	0.398021	0.835415
2099	A	0.38737	0.361195	0.29803	0.430339	0.340825	0.285163	0.64742	0.723376	0.765819	0.519797	0.662518	0.785291	0.326531	0.649129
2144	A	0.349055	0.359837	0.282338	0.333427	0.306279	0.320666	0.684235	0.72267	0.839717	0.632277	0.560711	0.627166	0.336167	0.593771
2203	A	0.125909	0.0961261	0.0902649	0.0837638	0.0726702	0.0555967	0.135815	0.197111	0.124708	0.132838	0.136774	0.162372	0.0984456	0.198496
2227	A	0.056237	0.0707464	0.0950344	0.0657866	0.0667177	0.042107	0.0843381	0.0789767	0.118833	0.0933519	0.0613922	0.0620694	0.121528	0.0900576
2249	A	0.783148	0.74365	0.965537	0.938214	0.632016	0.848067	0.0984931	0.117991	0.132785	0.0768167	0.117099	0.115409	1.53532	0.124962
2259	A	0.273821	0.239065	0.298063	0.342547	0.245861	0.390454	0.110669	0.122707	0.122887	0.0468974	0.0716846	0.0961404	0.401365	0.0866952
2264	A	0.305674	0.2829	0.158921	0.495335	0.195007	0.281532	0.124052	0.177235	0.233198	0.0917189	0.167703	0.195704	0.354299	0.12452
2272	A	0.797872	0.654367	0.522116	1.08618	0.482727	0.651792	0.225127	0.251087	0.349131	0.180033	0.245754	0.329406	0.995546	0.294163
2275	A	0.817127	0.751807	0.582003	1.1817	0.619631	0.771595	0.195364	0.202173	0.222148	0.147391	0.219607	0.29524	0.969516	0.205358
2278	A	1.27538	1.12213	1.15696	1.45184	1.17529	1.00723	0.727987	0.763939	1.04065	0.606263	1.02017	1.11373	1.50077	0.791752
2281	A	0.93822	1.02527	1.32448	1.00629	1.0903	1.01028	0.964809	1.10242	1.45584	0.764925	1.41974	1.25848	1.3548	0.868758
2296	A	0.295999	0.372352	0.285249	0.371541	0.291461	0.185449	0.084028	0.147828	0.219595	0.109786	0.113954	0.162209	0.317378	0.0885226
2303	A	0.114563	0.114539	0.0927357	0.14602	0.1187	0.0958296	0.0625117	0.121745	0.160668	0.0910603	0.100372	0.130995	0.103903	0.0640294
2304	A	0.0821808	0.0780365	0.0798882	0.0965997	0.0817987	0.074107	0.0657895	0.0891518	0.114036	0.0644148	0.0901151	0.0722609	0.101839	0.0481314
2309	A	0.205906	0.194272	0.175907	0.272936	0.225801	0.191126	0.7162	0.660427	0.818339	0.614033	0.539885	0.544459	0.208324	0.586439
2328	A	0.201839	0.228354	0.170263	0.297105	0.128633	0.210315	0.186736	0.287256	0.318091	0.192862	0.194224	0.296423	0.234367	0.334558
2337	A	0.200867	0.188387	0.181875	0.189097	0.147111	0.169388	0.120141	0.133216	0.101653	0.110305	0.0886313	0.133367	0.218798	0.132327
2343	A	0.146421	0.184047	0.142281	0.203303	0.114549	0.165144	0.178433	0.21481	0.290552	0.137038	0.219262	0.215105	0.176718	0.224425
2345	A	0.0818888	0.0928475	0.0561924	0.131383	0.0781576	0.144589	0.106413	0.147449	0.220261	0.108608	0.117541	0.0707069	0.107891	0.0929224
2356	A	0.144125	0.187953	0.189085	0.236197	0.22578	0.16435	0.439996	0.491458	0.536972	0.506115	0.501551	0.330619	0.171595	0.233841
2359	a	0.088285	0.0840905	0.0869727	0.140132	0.0777655	0.0668987	0.347209	0.44612	0.571996	0.311165	0.381859	0.146405	0.0862489	0.110605
2362	A	0.135883	0.189402	0.238949	0.194433	0.235516	0.207956	0.453627	0.541196	0.484217	0.468667	0.632894	0.571793	0.182679	0.426634
2363	A	0.0298583	0.0358608	0.0363835	0.0588999	0.0567342	0.0896496	0.17535	0.161852	0.178105	0.170284	0.225448	0.121656	0.0882134	0.0846879
2364	A	0.0245953	0.0323738	0.0342623	0.0444813	0.0508695	0.0688246	0.121424	0.140419	0.143282	0.112615	0.163184	0.0801179	0.0872953	0.0532823
2366	A	0.0212491	0.0282249	0.0324272	0.0423421	0.0380816	0.0553045	0.0240911	0.0171587	0.0326144	0.0260187	0.0222111	0.0109944	0.0571487	0.0106556
2370	A	0.0380342	0.041429	0.0475691	0.0445901	0.054547	0.0617497	0.0338131	0.0446058	0.0485396	0.0240566	0.049778	0.0260656	0.0724941	0.0298163
2371	A	0.0427583	0.0586479	0.0567921	0.0559046	0.0765724	0.0875315	0.197023	0.20999	0.229783	0.210957	0.1946	0.14038	0.0869785	0.127771
2372	A	0.0765779	0.0825544	0.091622	0.0632227	0.0992835	0.0957935	0.13866	0.160995	0.168201	0.119887	0.0987113	0.0987548	0.129557	0.0729509
2375	A	0.0586901	0.0354858	0.0415396	0.0426834	0.0480995	0.0794383	0.105465	0.130746	0.158228	0.102616	0.110656	0.116578	0.086945	0.117097
2377	A	0.165743	0.157197	0.180493	0.150408	0.178079	0.289351	0.504196	0.491548	0.463017	0.473264	0.47843	0.465831	0.324314	0.366397
2378	A	0.0801859	0.0836782	0.0679033	0.0887666	0.078635	0.13033	0.210263	0.195474	0.161826	0.156234	0.167261	0.140115	0.209885	0.146097
2384	A	0.112636	0.0905745	0.126424	0.160746	0.140324	0.161386	0.179472	0.162437	0.175459	0.123686	0.183049	0.114882	0.20295	0.0755087
2385	A	0.217974	0.230976	0.230508	0.248544	0.243131	0.174487	0.320546	0.334147	0.320582	0.301459	0.292458	0.183984	0.234926	0.184495
2391	A	1.02688	0.921454	0.927977	1.15487	1.12014	1.33115	0.884003	0.752066	0.688138	0.758977	0.824266	0.708103	1.25067	0.55302
2392	A	0.351267	0.331493	0.37021	0.577909	0.396278	0.505965	0.3694	0.42684	0.374911	0.317103	0.407675	0.349886	0.722421	0.286802
2397	a	0.331586	0.376438	0.41635	0.434851	0.436668	0.571611	0.524305	0.682895	0.719863	0.520444	0.604038	0.614128	0.698022	0.532489
2399	A	1.03791	0.935302	1.17079	1.05444	1.15492	1.16767	0.551237	0.534238	0.514377	0.500408	0.563119	0.590494	1.49991	0.441054
2400	A	1.07124	1.05036	1.36012	1.09884	1.2029	1.4241	0.564309	0.516317	0.481775	0.555757	0.546877	0.469388	1.48344	0.480412
2408	A	0.0570224	0.0698938	0.0834015	0.102796	0.089083	0.161892	0.0347067	0.0284474	0.0278974	0.0212605	0.0328036	0.0310815	0.178266	0.0368917
2413	A	0.0524296	0.0323632	0.051955	0.0562738	0.036543	0.0620818	0.0391055	0.0527983	0.0692496	0.0497187	0.0661771	0.0528281	0.0913562	0.0356405
2414	A	0.0476207	0.0538574	0.0678122	0.0733794	0.0664904	0.0710658	0.11348	0.129485	0.140903	0.106679	0.0938797	0.0551955	0.103297	0.0546558
2416	A	0.0597556	0.0576553	0.0794725	0.103626	0.078023	0.0936612	0.0765905	0.083795	0.110866	0.0702955	0.106256	0.0841968	0.101582	0.0967987
2419	A	0.0870409	0.0884736	0.0959208	0.120813	0.0926948	0.0918318	0.292289	0.281334	0.307806	0.296207	0.212262	0.174039	0.112959	0.16015
2424	A	0.0563097	0.0783827	0.0617132	0.120215	0.123017	0.130971	0.0537137	0.104323	0.127424	0.0661407	0.125832	0.0812869	0.140857	0.0474729
2425	A	0.077427	0.0825092	0.0829503	0.156176	0.0990114	0.114567	0.0739033	0.087685	0.137549	0.0938336	0.100589	0.125013	0.141022	0.0589116
2427	A	0.134911	0.116697	0.133129	0.17796	0.147633	0.214841	0.247239	0.281193	0.410397	0.201502	0.229206	0.198777	0.218452	0.19016
2434	A	0.17793	0.179467	0.153975	0.217475	0.182693	0.240187	0.166688	0.246978	0.253146	0.149292	0.164833	0.259595	0.233136	0.158585
2445	A	0.185181	0.204045	0.203241	0.278663	0.234044	0.220444	0.246213	0.276671	0.38359	0.257183	0.286144	0.300721	0.263744	0.268869
2447	A	0.129829	0.13193	0.0927952	0.160678	0.118726	0.134238	0.0915955	0.149161	0.151194	0.104492	0.129568	0.112757	0.161098	0.0927824
2449	A	0.30391	0.277949	0.24121	0.321008	0.261777	0.271283	0.299291	0.283529	0.286233	0.266263	0.273507	0.293811	0.348421	0.28514
2456	A	0.563984	0.515306	0.402843	0.627129	0.422667	0.480898	0.369224	0.413454	0.391786	0.361609	0.448876	0.477138	0.533528	0.388692
2468	A	0.142208	0.135444	0.0959014	0.190271	0.105395	0.170532	0.0928253	0.0929555	0.13587	0.0853188	0.109534	0.124055	0.184863	0.12039
2469	A	0.147605	0.131182	0.106974	0.146994	0.107383	0.203431	0.285256	0.296683	0.263523	0.26341	0.149991	0.205746	0.200607	0.353589
2473	A	0.0858127	0.0890629	0.0736025	0.131477	0.0850672	0.128356	0.0613107	0.0624442	0.102184	0.0443257	0.0703642	0.104576	0.120415	0.0741171
2480	A	0.0710295	0.0617007	0.0497836	0.0914967	0.0682862	0.0853242	0.0681442	0.0589909	0.108147	0.0832483	0.0691085	0.0578392	0.082992	0.0573032
2503	A	0.139739	0.0985363	0.11715	0.220891	0.128712	0.146104	0.139332	0.189533	0.210086	0.104968	0.156236	0.187874	0.130325	0.179806
2507	A	0.0731616	0.0690366	0.0710269	0.125459	0.070344	0.0750177	0.0910163	0.0980694	0.0802821	0.0830956	0.125311	0.113284	0.0966413	0.101786
2508	A	0.0870511	0.087564	0.0757935	0.14843	0.10627	0.113871	0.191309	0.194219	0.190289	0.189013	0.192911	0.164904	0.134939	0.169412
2509	A	1.09785	1.1638	1.10028	1.22555	1.34399	1.07734	0.320523	0.301901	0.314291	0.283238	0.202074	0.352422	1.09144	0.395497
2513	A	0.205834	0.207539	0.203082	0.263898	0.237673	0.188341	0.719389	0.708413	0.548499	0.617054	0.601482	0.80652	0.20918	0.664704
2523	A	0.0459217	0.0437927	0.0645876	0.064991	0.0674838	0.0790216	0.0565403	0.0596633	0.062608	0.0715219	0.0515227	0.049773	0.0852919	0.0629195
2525	A	0.0407897	0.0494454	0.0308842	0.040578	0.0405522	0.0708756	0.0652519	0.0495432	0.0533888	0.0344903	0.035393	0.0340272	0.0798855	0.0441299
2532	A	0.122567	0.159445	0.203787	0.148764	0.187073	0.172129	0.211101	0.244705	0.235994	0.202893	0.214523	0.216845	0.16735	0.173193
2533	A	0.0534836	0.0643021	0.055089	0.0794389	0.061113	0.102807	0.0630802	0.0839213	0.0954034	0.0723868	0.100254	0.11803	0.139188	0.0828876
2539	A	0.1336	0.161892	0.128944	0.205975	0.145629	0.159784	0.277979	0.293326	0.297862	0.227959	0.253858	0.222888	0.229145	0.24531
2547	A	0.697305	0.676739	0.553374	0.790414	0.627743	0.645447	0.979118	1.06921	1.14541	0.840192	0.878519	1.04394	0.583908	0.918302
2549	A	0.111548	0.0975402	0.0922218	0.117684	0.0842773	0.124351	0.0805987	0.0887073	0.0961487	0.0690415	0.0985164	0.0665686	0.165825	0.113153
2561	A	0.0629939	0.0687722	0.0602728	0.0752325	0.0673141	0.0514108	0.070449	0.0517116	0.0747885	0.036279	0.0397122	0.0556958	0.0801234	0.0721116
2569	A	0.0218131	0.0145113	0.017484	0.0293848	0.0239806	0.0152455	0.0260375	0.0291729	0.0305048	0.0292167	0.0224871	0.0334456	0.023576	0.029525
2577	A	0.0543259	0.0656908	0.0411199	0.0721813	0.077919	0.0506726	0.173758	0.211039	0.266876	0.147179	0.196771	0.136491	0.0744552	0.134419
2578	A	0.0608284	0.064775	0.0392741	0.0852966	0.0682128	0.0794025	0.0582165	0.0865052	0.0924972	0.0566307	0.0592754	0.0395333	0.0917355	0.0380763
2583	A	0.215827	0.269781	0.335421	0.261662	0.330317	0.242065	0.265005	0.302021	0.351554	0.248527	0.259607	0.234245	0.258278	0.264657
2587	A	0.0696828	0.0922245	0.140201	0.0963359	0.131974	0.09448	0.077324	0.0980701	0.0807602	0.0726038	0.0816975	0.0920521	0.135028	0.0605457
2594	A	0.175423	0.184909	0.205873	0.256281	0.224728	0.17519	0.26686	0.299809	0.334469	0.226578	0.336976	0.31315	0.212703	0.247485
2596	A	0.054807	0.0636348	0.0688046	0.0765913	0.0739833	0.0961333	0.0382128	0.0549275	0.0616051	0.0378098	0.0545879	0.0573273	0.106641	0.0538195
2597	A	0.159669	0.184915	0.140228	0.192975	0.163587	0.183617	0.114381	0.121541	0.130227	0.112056	0.125042	0.111943	0.233959	0.090941
2607	A	0.438789	0.515349	0.480911	0.570881	0.536516	0.606114	0.59049	0.636867	0.743409	0.499756	0.611354	0.560953	0.801219	0.379572
2617	A	0.407988	0.466777	0.556059	0.532973	0.50895	0.649197	0.327341	0.455859	0.51374	0.277393	0.340325	0.500729	1.09165	0.488088
2619	A	0.152817	0.199854	0.229126	0.284987	0.22389	0.291295	0.239208	0.262143	0.265031	0.184867	0.226056	0.192295	0.407754	0.231056
2637	A	0.180145	0.224696	0.228677	0.236871	0.221541	0.176282	0.267763	0.3163	0.277024	0.199014	0.290342	0.233666	0.237999	0.206383
2638	A	0.56371	0.537696	0.511843	0.563703	0.538876	0.331643	0.675433	0.720173	0.73514	0.593801	0.602968	0.432211	0.414513	0.438218
2643	A	0.911258	0.82785	0.733762	0.840242	0.653212	0.653822	0.885761	0.830335	0.920836	0.823176	0.756478	0.599293	0.817218	0.844241
2655	A	0.0692967	0.0373278	0.0575381	0.0986597	0.06601	0.0733611	0.0683233	0.0943891	0.140948	0.0857348	0.0673075	0.0946334	0.0999593	0.0872908
2656	A	0.0484408	0.0630986	0.0585641	0.0861704	0.0812337	0.0690374	0.0979926	0.12133	0.130721	0.104934	0.0966467	0.0945651	0.106582	0.124249
2670	A	0.236193	0.245009	0.187002	0.377472	0.257948	0.193948	0.124057	0.149205	0.169224	0.153854	0.179601	0.195828	0.2525	0.142043
2672	A	0.107328	0.123446	0.135005	0.164728	0.136252	0.174218	0.148787	0.138558	0.17766	0.131452	0.18266	0.165489	0.200563	0.166398
2674	A	0.234296	0.205371	0.285815	0.224502	0.243465	0.220426	0.290324	0.30893	0.581685	0.24627	0.255503	0.390975	0.240413	0.34261
2691	A	0.0692453	0.0821274	0.0825423	0.0690898	0.0594185	0.0548805	0.0967158	0.0885341	0.0866301	0.0877663	0.0684797	0.0995537	0.0676706	0.0845487
2692	A	0.0560497	0.0441301	0.0414717	0.0738541	0.0488878	0.0766646	0.105235	0.118415	0.13996	0.109261	0.104611	0.113443	0.0985053	0.127021
2693	A	0.060595	0.0589023	0.0708516	0.0749547	0.0729592	0.105668	0.162402	0.193348	0.154802	0.113808	0.142992	0.216727	0.110546	0.166124
2721	A	0.0527841	0.066085	0.0562598	0.0604299	0.0526573	0.0734987	0.0651804	0.076149	0.0813445	0.0716662	0.0656146	0.0435723	0.111364	0.0854546
2739	A	0.0815436	0.0731393	0.0660997	0.0635425	0.0737337	0.108424	0.0639303	0.0680426	0.0722813	0.0656579	0.0741245	0.105051	0.155706	0.0776521
2740	A	0.0439641	0.0528484	0.0420098	0.0612865	0.0589376	0.0702309	0.0288264	0.0174144	0.0188262	0.0329712	0.0273481	0.0361914	0.0772828	0.0397665
2741	A	0.0429997	0.0470607	0.0210303	0.0564389	0.0514701	0.0813759	0.0314165	0.0467564	0.0338872	0.0254521	0.0410428	0.0510658	0.0639891	0.0319157
2742	A	0.0963717	0.101147	0.0687087	0.100763	0.0880187	0.125632	0.0625741	0.0625274	0.0588611	0.0746391	0.0834243	0.0952334	0.12585	0.074898
2751	A	0.494883	0.518936	0.416121	0.568656	0.416452	0.579127	0.218863	0.282028	0.283024	0.292556	0.287496	0.371144	0.614146	0.390619
2753	A	0.521091	0.497859	0.330455	0.609942	0.388538	0.455619	0.235352	0.319441	0.29291	0.286737	0.279994	0.307519	0.47756	0.32257
2760	A	0.182512	0.190417	0.153221	0.246219	0.189102	0.193632	0.22441	0.241404	0.213006	0.28241	0.341957	0.460784	0.137654	0.401353
2761	A	0.0793397	0.0762885	0.0585095	0.12005	0.0539374	0.0639211	0.0641158	0.0682229	0.0659889	0.0693417	0.0643898	0.0730399	0.0919827	0.0836429
2762	A	0.0435858	0.0389982	0.0364524	0.0691002	0.0454165	0.0763054	0.0354622	0.0533994	0.0618678	0.0372757	0.0512329	0.0448713	0.0843744	0.0396056
2779	A	0.178406	0.153101	0.166928	0.197985	0.186875	0.16837	0.188728	0.24915	0.294154	0.168108	0.230113	0.145328	0.187463	0.125685
2783	a	0.088671	0.0840701	0.0670256	0.13783	0.0955078	0.112411	0.244296	0.271849	0.273733	0.254271	0.258202	0.172009	0.129224	0.150217
2785	A	0.151866	0.120673	0.13071	0.15302	0.161129	0.137689	0.243897	0.221795	0.189452	0.202049	0.232152	0.188513	0.170803	0.140145
2791	A	0.493547	0.453795	0.50892	0.519035	0.531567	0.531035	0.631763	0.656572	0.551921	0.556986	0.62132	0.615745	0.562181	0.534477
2794	A	0.302992	0.322927	0.268587	0.322176	0.320202	0.289017	0.188765	0.157878	0.187652	0.184742	0.178815	0.222797	0.352102	0.199802
2802	A	0.080599	0.0818964	0.0748578	0.0993991	0.0779897	0.124683	0.162429	0.146573	0.206723	0.148206	0.167209	0.17962	0.134967	0.166807
2803	A	0.0988037	0.0981872	0.0973797	0.122665	0.113788	0.137434	0.174513	0.180073	0.193252	0.14779	0.182484	0.187421	0.163195	0.169089
2808	A	0.057732	0.0573696	0.0808802	0.0648539	0.0568601	0.115097	0.143943	0.192111	0.261141	0.097274	0.138745	0.160052	0.118105	0.128972
2809	A	0.0776461	0.0713439	0.0924669	0.102324	0.100004	0.135424	0.166037	0.188724	0.286682	0.122566	0.169376	0.195414	0.178665	0.167383
2811	a	0.0419979	0.0339974	0.0413807	0.044331	0.0456396	0.0610623	0.0835726	0.0935557	0.122225	0.0703419	0.0677736	0.0668622	0.0806881	0.0442233
2821	A	0.0885835	0.0881591	0.0771923	0.0958906	0.0910722	0.0821996	0.189832	0.183987	0.197024	0.12807	0.134616	0.105827	0.0932533	0.100965
2828	A	0.086513	0.110816	0.102853	0.129563	0.102357	0.13296	0.148577	0.239098	0.258539	0.15675	0.218053	0.172874	0.14724	0.172514
2829	A	0.0721103	0.0728911	0.0865363	0.0566789	0.0926615	0.111506	0.193386	0.210473	0.268995	0.144213	0.203336	0.193655	0.104819	0.18406
2831	A	0.102888	0.0972415	0.115377	0.165681	0.14979	0.0768314	0.189647	0.20706	0.244763	0.1667	0.187029	0.139867	0.0591432	0.124196
2832	A	0.0665741	0.0704084	0.0606991	0.0865786	0.112537	0.0960887	0.0795087	0.114163	0.117027	0.0989048	0.0987394	0.0711438	0.101352	0.0704132
2836	A	0.180607	0.132476	0.151094	0.213364	0.176929	0.108929	0.191458	0.19715	0.228713	0.161803	0.196373	0.144571	0.123971	0.156575
2840	A	0.176474	0.195063	0.173244	0.232292	0.182626	0.168333	0.42143	0.448953	0.613108	0.296106	0.550629	0.457587	0.188543	0.397446
2841	A	0.353243	0.303018	0.331864	0.332967	0.301568	0.289697	0.593659	0.554105	0.703278	0.539184	0.559226	0.569376	0.316941	0.524555
2845	A	0.190259	0.191063	0.162098	0.245689	0.18289	0.208447	0.251827	0.302615	0.340353	0.209338	0.291559	0.350665	0.196108	0.322284
2846	A	0.222706	0.195082	0.178409	0.240321	0.246869	0.200749	0.346087	0.351365	0.414804	0.270352	0.312015	0.40874	0.242562	0.441204
2853	A	0.117183	0.0910887	0.11576	0.155045	0.125309	0.126342	0.531805	0.545952	0.657297	0.463428	0.648799	0.658441	0.171587	0.616132
2854	A	0.0867145	0.0921889	0.0797325	0.0940616	0.0754337	0.124324	0.300997	0.272704	0.349943	0.245339	0.327309	0.317887	0.170511	0.319408
2860	A	0.151218	0.174843	0.177811	0.193111	0.170324	0.19038	0.558236	0.578535	0.574626	0.545859	0.635351	0.640319	0.271357	0.740255
2866	A	0.024945	0.0288455	0.0245658	0.0225967	0.0289484	0.0472772	0.182873	0.157416	0.200572	0.133597	0.142393	0.140209	0.0422827	0.164021
2867	A	0.0394546	0.0446726	0.0267551	0.0562246	0.0194375	0.0367065	0.115947	0.108927	0.134245	0.100153	0.130527	0.12392	0.0654436	0.11081
2875	A	0.108348	0.080943	0.0935235	0.0919459	0.112056	0.0896878	0.271696	0.304514	0.333775	0.239069	0.312823	0.25182	0.0994781	0.262522
2877	A	0.0561418	0.0421016	0.0300836	0.0645946	0.0442387	0.0579123	0.0559725	0.0791737	0.0823424	0.0681537	0.0882538	0.0577818	0.0952835	0.0713007
2878	A	0.0610237	0.034922	0.0386532	0.0524207	0.0390545	0.0897415	0.0942261	0.0809283	0.105717	0.114645	0.0902226	0.0399446	0.0924438	0.0858904
2881	A	0.0505545	0.0416762	0.03529	0.0804669	0.0509954	0.0775862	0.0870983	0.082046	0.117219	0.0877621	0.104008	0.0638463	0.0754776	0.0710004
2890	A	0.141935	0.134071	0.129032	0.160453	0.154602	0.110087	0.159679	0.210124	0.272451	0.193455	0.299581	0.237697	0.153894	0.151306
2891	A	0.210105	0.175474	0.16702	0.233467	0.148797	0.212736	0.324267	0.365082	0.395611	0.310099	0.423249	0.357498	0.233925	0.29653
2919	A	0.156556	0.172971	0.133224	0.250814	0.169588	0.27104	0.377381	0.396566	0.37614	0.39444	0.284026	0.270735	0.32035	0.379942
2920	A	0.139098	0.13589	0.13369	0.17365	0.155094	0.180659	0.341221	0.30886	0.296521	0.293559	0.22823	0.277928	0.266847	0.299888
2948	A	0.075358	0.157424	0.136086	0.0631478	0.138752	0.192411	0.35378	0.487504	0.531947	0.2953	0.597555	0.670383	0.103003	0.389434
2951	A	0.0328742	0.0527763	0.0461122	0.023713	0.057608	0.0586235	0.137618	0.176748	0.235747	0.123219	0.216307	0.190938	0.0545698	0.191787
2970	A	0.017479	0.0166951	0.0349362	0.0127307	0.0255907	0.0283556	0.070028	0.0820049	0.180622	0.0677823	0.0833013	0.138285	0.0170058	0.0913302
2981	A	0.0254028	0.0247608	0.0326597	0.0218877	0.0453745	0.0272423	0.114117	0.0974601	0.208862	0.0854682	0.150261	0.186444	0.0562036	0.168579
3008	A	0.100491	0.0655057	0.100515	0.123082	0.135204	0.138082	0.222276	0.199857	0.345638	0.1848	0.2363	0.365154	0.197135	0.204274
3037	A	15.5283	18.0962	19.7622	22.7657	13.6546	15.3097	17.1866	19.9496	20.3421	26.0447	15.4891	15.957	18.9487	17.1467
3096	A	0.806994	0.688863	0.883002	1.07914	0.688468	0.345622	0.314172	0.140102	0.292113	0.222017	0.330092	0.323523	0.667705	0.377358
3124	A	0.701481	0.716757	0.668502	0.726282	0.52521	0.652819	0.384615	0.392863	0.500978	0.424701	0.309724	0.320264	0.85003	0.260805
3126	A	0.958957	0.533075	0.348837	0.903751	0.414938	0.581226	0.398711	0.374096	0.504525	0.557844	0.289448	0.246451	0.623639	0.27834
3127	A	1.37143	0.795756	0.463858	1.12714	0.826446	0.721085	1.03232	0.820896	0.720222	0.805553	0.889548	0.75056	0.808121	0.72956
3141	A	0.148075	0.247777	0.278129	0.289482	0.258876	0.280112	0.39468	0.411765	0.417759	0.511702	0.409103	0.486341	0.390806	0.44764
3184	A	0.302013	0.221984	0.220192	0.261254	0.237018	0.201628	0.278222	0.231154	0.184983	0.19695	0.246135	0.194283	0.204641	0.206029
3197	A	0.681443	0.762625	0.961256	0.799864	1.25403	0.688688	0.948249	1.06161	1.1939	0.661338	0.696532	0.769368	0.437111	0.74914
3211	A	0.188929	0.178851	0.230055	0.312591	0.185736	0.270519	0.435493	0.622326	1.16831	0.410458	0.864833	1.45333	0.270636	0.599959
3236	A	0.209369	0.22249	0.242702	0.313615	0.293619	0.228438	0.489091	0.635018	0.958084	0.392432	0.919665	1.07481	0.247685	0.863993
3243	A	0.137438	0.156296	0.155918	0.109086	0.105374	0.110626	0.382476	0.399369	0.318019	0.383859	0.33257	0.542121	0.196054	0.471595
3248	A	0.115043	0.104291	0.0780806	0.126703	0.164509	0.147334	0.290965	0.416422	0.435422	0.40219	0.453323	0.46582	0.222251	0.370661
3267	A	0.0528192	0.077993	0.10463	0.0764409	0.14877	0.145474	0.134581	0.331553	0.236728	0.138989	0.223591	0.137916	0.161751	0.0918485
3275	A	0.291776	0.226285	0.247333	0.301329	0.261743	0.245264	0.569319	0.66472	0.405223	0.43956	0.511533	0.636262	0.334875	0.463447
3307	A	0.0417493	0.0151876	0.0461255	0.0243427	0.0668124	0.0548196	0.0658013	0.148324	0.115863	0.110428	0.0514067	0.166149	0.0452625	0.165076
3338	A	0.35579	0.385068	0.355187	0.408841	0.719975	0.962896	0.169866	0.169835	0.198798	0.139695	0.226338	0.225141	1.28407	0.190738
3343	A	2.45614	2.07332	2.77674	3.10128	2.60406	4.52166	2.30554	2.78021	3.32793	3.412	2.37459	2.22841	4.25384	2.09624
3378	A	1.51351	0.859984	1.31894	1.94265	0.86079	1.6316	1.25699	1.41276	2.02283	1.19031	1.50327	1.79028	1.54085	1.93937
3437	A	0	0.0211797	0.0372162	0.0151676	0.0498008	0.0458625	0.0709364	0.0867002	0.139799	0.0238152	0.0802118	0.214073	0.0432048	0.112095
3501	A	8.50431	7.60502	8.28112	10.707	7.57811	7.51669	14.092	15.1809	16.4914	16.7738	17.5747	17.0118	7.58117	14.6289
3510	A	0.718976	0.557777	0.448638	1.02803	0.776094	0.960627	2.74859	2.88162	3.84686	2.74841	4.27466	5.06492	0.498245	3.28656
3591	A	0.169849	0.138642	0.148221	0.270945	0.169967	0.190712	0.121766	0.149628	0.173247	0.0366986	0.100379	0.0974882	0.118225	0.126671
3594	A	0.143625	0.251242	0.190045	0.269868	0.266897	0.248276	0.164054	0.148478	0.28549	0.0918063	0.268974	0.333961	0.18886	0.242023
3599	A	0.271809	0.352501	0.24239	0.306878	0.425945	0.216439	0.238964	0.23506	0.398189	0.155758	0.231495	0.30996	0.237208	0.245295
3603	A	0.102992	0.126478	0.0865614	0.0796094	0.170345	0.197565	0.0344279	0.0408868	0.0622172	0.0252225	0.028231	0.0515996	0.11902	0.0227666
3605	A	0.0703871	0.091758	0.0497654	0.114001	0.123627	0.141584	0.0252706	0.0312444	0.0277994	0.0353357	0.0498919	0.0396331	0.121576	0.0268037
3606	A	0.155054	0.204016	0.0919703	0.133917	0.173511	0.261329	0.0755446	0.0400249	0.0941985	0.0492958	0.105007	0.135494	0.165608	0.0713267
3616	A	0.756471	0.898073	0.819091	1.01458	0.965464	0.849268	0.182171	0.210722	0.319439	0.120073	0.212303	0.302654	0.876326	0.166738
3619	A	0.895776	1.16992	1.25669	1.38384	1.54793	0.987068	0.380633	0.516087	0.546638	0.39717	0.484941	0.581515	1.29063	0.469139
3624	A	0.334919	0.420313	0.585022	0.405373	0.4329	0.421523	0.207382	0.184519	0.270373	0.167305	0.273516	0.313504	0.55174	0.217789
3625	A	0.3638	0.349716	0.367717	0.461648	0.316724	0.445442	0.230608	0.320035	0.306818	0.272311	0.300265	0.355288	0.602477	0.257975
3630	A	0.0995541	0.122997	0.120706	0.181715	0.10564	0.172576	0.274968	0.265157	0.278634	0.242615	0.282236	0.22223	0.198942	0.191334
3637	A	0.0210847	0.0222879	0.016469	0.0160388	0.0204625	0.0412991	0.0175061	0.0242915	0.0314861	0.00456059	0.0265675	0.00326381	0.0433301	0.0184623
3638	A	0.0316151	0.034651	0.0301664	0.0348329	0.0198455	0.0564771	0.0197809	0.0133333	0.0187003	0.0428913	0.0164069	0.00962001	0.0676404	0.023301
3641	A	0.0163637	0.0149444	0.0230703	0.0195653	0.0214254	0.0361039	0.0165979	0.030592	0.0419224	0.0216436	0.0187635	0.0154397	0.0279745	0.012577
3642	A	0.0266146	0.0107955	0.0261588	0.0226904	0.0273241	0.0592445	0.0234522	0.0428201	0.0682979	0.0407515	0.0647489	0.0240645	0.0411605	0.022081
3643	A	0.0132722	0.0147895	0.0179141	0.0177804	0.0257003	0.0404493	0.00935519	0.0200899	0.0296147	0.0149761	0.00921291	0.00596855	0.0511134	0.0170524
3644	A	0.0323858	0.0456204	0.0357323	0.0419416	0.0467283	0.073088	0.0279896	0.0275489	0.0799077	0.0705173	0.0582233	0.0357292	0.0633425	0.0316025
3646	A	0.0232832	0.0211811	0.0191785	0.0399623	0.0414772	0.0466759	0.0624783	0.0943232	0.149877	0.0468105	0.105878	0.0793861	0.0738966	0.089133
3647	A	0.0524384	0.0437098	0.033585	0.0575714	0.0577829	0.0716042	0.0604173	0.112222	0.0856089	0.106847	0.1152	0.0412238	0.0840186	0.0362074
3648	A	0.117777	0.101775	0.0941169	0.127775	0.128428	0.295416	0.099805	0.114593	0.162204	0.121714	0.148296	0.152735	0.380645	0.110854
3651	A	0.0381691	0.0385613	0.0399667	0.0568773	0.054771	0.0677507	0.0914627	0.121488	0.176759	0.134339	0.12023	0.106525	0.0977562	0.109655
3657	A	0.109257	0.0948717	0.123166	0.113585	0.146579	0.152003	0.108956	0.108488	0.130262	0.117494	0.163187	0.158303	0.230717	0.160873
3658	A	0.110681	0.0922737	0.104467	0.139247	0.159515	0.187202	0.185266	0.155616	0.191199	0.169159	0.154729	0.205404	0.278817	0.152078
3677	A	0.409395	0.366977	0.329826	0.504388	0.425822	0.420571	0.159385	0.224164	0.159657	0.153004	0.122281	0.181128	0.553863	0.151583
3682	A	0.409197	0.473121	0.458516	0.521586	0.476963	0.423513	0.25649	0.24068	0.229246	0.217341	0.268947	0.198597	0.535662	0.151153
3687	A	0.0761529	0.176375	0.303635	0.4694	0.0806264	0.114216	0.0680063	0.192367	0.344911	0.430413	0.0452104	0.0513334	0.172857	0.0462263
3697	A	0.306586	0.359082	0.45853	0.398723	0.410931	0.285104	0.179483	0.184097	0.273116	0.221355	0.171522	0.177498	0.376311	0.129077
3706	A	0.098166	0.075899	0.0571397	0.13587	0.0844273	0.0821055	0.0483665	0.0523972	0.0446957	0.0496565	0.0380042	0.0618748	0.108053	0.0492042
3707	A	0.092806	0.0858874	0.0493097	0.11285	0.0573235	0.10716	0.048057	0.0592221	0.0732179	0.0657949	0.0728706	0.0617459	0.128759	0.0875339
3712	A	0.0965347	0.0664259	0.0783738	0.126555	0.0747988	0.0474905	0.319587	0.294234	0.349626	0.264617	0.313428	0.417243	0.0519642	0.316007
3713	a	0.0407802	0.0480162	0.0329343	0.0457289	0.0354736	0.044484	0.263847	0.249053	0.27058	0.138093	0.192052	0.232815	0.0687738	0.190544
3714	A	0.149703	0.156982	0.147271	0.157639	0.133666	0.967764	0.171752	0.146756	0.194433	0.134076	0.188923	0.252599	1.13738	0.220953
3718	A	0.0476405	0.0698649	0.0634596	0.0801546	0.0923865	0.055811	0.052281	0.0774399	0.0788832	0.0415312	0.0550002	0.0359764	0.0503566	0.0157394
3719	a	0.0356154	0.0413234	0.0401613	0.0470763	0.0683193	0.0811041	0.0364774	0.0581951	0.0594106	0.0483481	0.0498895	0.0238214	0.0595374	0.0332382
3721	A	0.0409414	0.0465941	0.0339994	0.0613944	0.0348913	0.0520673	0.0891024	0.0294998	0.0675382	0.0721787	0.0455898	0.014455	0.07273	0.0514648
3722	A	0.0263068	0.0399428	0.0338613	0.0554253	0.0375021	0.0530181	0.0422435	0.0418235	0.0335064	0.0286682	0.0404868	0.0310314	0.0612706	0.0215619
3723	A	0.04536	0.0407659	0.0506774	0.0755401	0.0730312	0.0836306	0.0265438	0.0226351	0.0355906	0.0246988	0.0494478	0.0399812	0.0797224	0.0212573
3727	A	0.040044	0.0406159	0.0522092	0.0661357	0.0655317	0.0723628	0.0205734	0.0101393	0.0211815	0.0209377	0.0232515	0.0211526	0.0533211	0.0153298
3728	A	0.0739202	0.0691285	0.054732	0.110904	0.0672099	0.0973064	0.0226736	0.0245595	0.0357483	0.0140907	0.0165207	0.0316973	0.0707816	0.0156887
3731	A	0.0934338	0.0907353	0.060311	0.10053	0.0976258	0.0737302	0.0614903	0.103068	0.0661641	0.0538082	0.0487703	0.0938673	0.0825795	0.0562517
3732	A	0.146251	0.179804	0.126846	0.197879	0.143773	0.177716	0.0520833	0.0746314	0.0943129	0.0778076	0.0486979	0.0984607	0.165476	0.0658035
3741	A	0.3427	0.279247	0.186865	0.421918	0.227021	0.290403	0.0767677	0.0968331	0.073107	0.0708434	0.0852017	0.142928	0.277719	0.10139
3742	A	0.171348	0.179729	0.104667	0.219424	0.155936	0.22668	0.0749625	0.0794649	0.0706048	0.0562961	0.0779879	0.171024	0.27295	0.107434
3743	A	0.258533	0.224896	0.123184	0.2782	0.172119	0.308171	0.0675219	0.0846967	0.0816692	0.0604661	0.0663325	0.18533	0.340599	0.110657
3751	A	0.346544	0.308913	0.250403	0.373676	0.282237	0.256396	0.239216	0.214111	0.322192	0.25341	0.197029	0.208759	0.357471	0.268974
3754	A	0.0489812	0.0484546	0.0544724	0.093579	0.0346573	0.0607144	0.110327	0.0955071	0.0904348	0.136482	0.111992	0.0623508	0.0819538	0.0715391
3755	a	0.0403722	0.0346711	0.034252	0.0590823	0.0317034	0.0776738	0.0550525	0.0730194	0.0463274	0.051123	0.0387113	0.0343473	0.0752511	0.0675506
3758	A	0.0277259	0.033555	0.034888	0.0334095	0.036788	0.0271278	0.0778816	0.0909414	0.142444	0.0634592	0.0582872	0.032009	0.0450052	0.0502486
3761	A	0.033023	0.0358224	0.0232913	0.0374142	0.0419417	0.051276	0.0600894	0.0802262	0.0891103	0.0656024	0.0649568	0.0548201	0.0587849	0.0343072
3769	A	0.0381929	0.0291062	0.0375136	0.0407949	0.0319798	0.0550081	0.0531393	0.0652344	0.0515123	0.0562307	0.0357974	0.0570571	0.0521248	0.0259952
3770	A	0.218098	0.220642	0.188478	0.201131	0.220757	0.148648	0.0593946	0.0521932	0.068614	0.0545603	0.0425399	0.0464331	0.145613	0.0465194
3774	A	0.119866	0.161181	0.151312	0.129982	0.121756	0.108512	0.317881	0.291889	0.291695	0.251296	0.281898	0.175239	0.137966	0.205408
3778	A	0.124645	0.125306	0.112301	0.140676	0.130551	0.143835	0.980488	0.962424	0.888133	0.826823	0.848501	0.602197	0.193651	0.554874
3779	A	0.121199	0.0820885	0.131869	0.118085	0.084453	0.134582	0.499207	0.406326	0.470917	0.383746	0.364099	0.242499	0.244275	0.272455
3780	a	0.0853614	0.108133	0.0807862	0.103385	0.0816554	0.128114	1.22302	1.12214	1.27492	0.944496	1.09845	0.320808	0.18727	0.34419
3790	A	0.0234907	0.0215317	0.021425	0.0292108	0.0232544	0.0270665	0.0886713	0.0795448	0.173865	0.0585964	0.0805767	0.0903723	0.037996	0.0716127
3794	A	0.0386615	0.0453415	0.0382957	0.0413322	0.0514682	0.0415642	0.0505662	0.0426787	0.0528751	0.0295882	0.0331806	0.0381512	0.048643	0.0409703
3795	A	0.0231526	0.0257771	0.0239216	0.014033	0.0245248	0.0477471	0.0160511	0.00958644	0.0109223	0.00488075	0.0123047	0.011309	0.043923	0.0084391
3798	A	0.0325113	0.0369996	0.0437241	0.0371793	0.0312453	0.0435473	0.0234082	0.0252869	0.0356657	0.0262994	0.0167004	0.0135509	0.0244564	0.0206626
3802	A	0.042568	0.0443023	0.0484994	0.0535668	0.0507241	0.0565635	0.176994	0.185553	0.16994	0.173288	0.155098	0.121255	0.069812	0.0785113
3808	A	0.40277	0.417459	0.458631	0.420786	0.367429	0.306032	0.259862	0.295852	0.236285	0.241534	0.216857	0.225827	0.498856	0.190496
3811	A	0.0413212	0.0504484	0.0459696	0.0482641	0.0423414	0.0710773	0.038719	0.0624751	0.0498204	0.0453858	0.0172189	0.0287749	0.0960472	0.0301324
3812	A	0.0409087	0.0361148	0.0534896	0.0476675	0.0395755	0.0641181	0.0552334	0.0507561	0.0941935	0.066966	0.0520793	0.0400131	0.0874016	0.0641601
3816	A	0.054825	0.0488366	0.0315526	0.0480838	0.0471541	0.0739855	0.156341	0.171863	0.179684	0.135583	0.094005	0.0983842	0.0825453	0.176545
3819	A	0.0421603	0.0399002	0.044731	0.0399349	0.0266556	0.0502819	0.108216	0.118287	0.129926	0.0992214	0.125536	0.105647	0.065231	0.084241
3820	a	0.0350502	0.0503936	0.0498504	0.0529149	0.0471582	0.0493846	0.105639	0.0905472	0.0949721	0.107549	0.108844	0.0788359	0.07458	0.0721235
3823	A	0.0316216	0.0450088	0.0432002	0.0684565	0.0336105	0.0497013	0.112347	0.121684	0.130376	0.110267	0.122479	0.0600133	0.0666707	0.053708
3825	a	0.0373101	0.0382573	0.0368234	0.0360248	0.0384742	0.0680051	0.309758	0.228324	0.302577	0.201379	0.204942	0.144502	0.0596719	0.147497
3831	A	0.0680631	0.0680267	0.059972	0.0827875	0.0935304	0.0638197	0.18218	0.226291	0.22282	0.253273	0.190039	0.0606254	0.0777164	0.0608079
3840	A	0.0903743	0.0999654	0.13366	0.157593	0.162502	0.136402	0.141068	0.16781	0.268323	0.183412	0.193043	0.128641	0.129419	0.106
3844	A	0.0887453	0.0892573	0.0672109	0.126913	0.116071	0.0857886	0.0905286	0.0732461	0.112231	0.0615385	0.0919293	0.0348971	0.110191	0.0428456
3847	A	0.0739687	0.0676431	0.0774701	0.123545	0.0949361	0.0978661	0.0520423	0.039697	0.0697222	0.0406978	0.0537197	0.0418564	0.115615	0.0324304
3851	A	0.175811	0.196807	0.236475	0.234031	0.260819	0.272464	0.216264	0.213134	0.29567	0.148396	0.224719	0.183859	0.300472	0.157613
3855	A	0.114648	0.134996	0.154311	0.188665	0.214839	0.295873	0.120808	0.133805	0.156535	0.109604	0.154529	0.141499	0.330787	0.117893
3856	A	0.177575	0.167541	0.188034	0.223024	0.186457	0.2888	0.10053	0.126818	0.107868	0.0940871	0.145091	0.11029	0.302994	0.0614315
3857	A	0.262376	0.311594	0.263719	0.310771	0.314729	0.337191	0.0580279	0.0775557	0.0736739	0.0532311	0.0671097	0.0921613	0.461874	0.0630186
3860	A	0.293002	0.27822	0.279194	0.324009	0.274071	0.365276	0.280798	0.204672	0.257958	0.223455	0.231707	0.248143	0.396274	0.153819
3862	a	0.89885	0.803007	0.789955	0.990803	0.86609	0.992724	0.630086	0.566508	0.502607	0.555067	0.607716	0.693676	1.05138	0.548703
3866	A	0.508807	0.458438	0.417072	0.664781	0.462711	0.554509	0.348204	0.342624	0.32978	0.347511	0.413223	0.416328	0.607247	0.344542
3867	A	0.52593	0.501431	0.43467	0.655121	0.454619	0.595629	0.464421	0.503469	0.497673	0.45174	0.449244	0.636559	0.681287	0.474747
3871	A	0.259801	0.25945	0.211063	0.292199	0.281996	0.408701	0.258541	0.319195	0.352526	0.257983	0.331436	0.453373	0.406248	0.25156
3872	A	0.423602	0.45345	0.403791	0.47316	0.481489	0.617538	0.314336	0.404946	0.476989	0.357307	0.397325	0.619466	0.72228	0.398059
3885	A	1.18495	1.32961	1.28889	1.257	1.31925	0.799609	0.54938	0.658437	0.646302	0.50045	0.603751	0.495411	0.795688	0.38999
3886	A	0.396842	0.381025	0.314235	0.492104	0.359769	0.376443	0.28593	0.347953	0.35116	0.225536	0.315292	0.314736	0.483748	0.178247
3889	A	0.926764	0.915306	0.565257	1.22136	0.914454	0.741512	0.315473	0.437486	0.460464	0.306369	0.436876	0.535428	0.631277	0.302043
3896	A	1.32391	1.33858	0.967248	1.70672	1.31237	0.863633	0.431021	0.479997	0.457273	0.371469	0.405763	0.512167	0.705151	0.42036
3897	A	0.253725	0.286244	0.244997	0.450422	0.342567	0.241672	0.219993	0.244778	0.322958	0.197014	0.274899	0.263621	0.261666	0.203404
3898	A	0.312335	0.349913	0.287912	0.465362	0.311909	0.425014	0.232395	0.213951	0.228385	0.180391	0.259754	0.318576	0.440175	0.192901
3900	A	0.170731	0.191206	0.107532	0.279654	0.151274	0.132238	0.0571798	0.0737304	0.0916789	0.0746482	0.0656976	0.0690712	0.172493	0.068603
3901	A	0.0806926	0.0906714	0.0825244	0.1452	0.104536	0.0990258	0.049172	0.0514823	0.090525	0.0679617	0.0637878	0.0915312	0.155156	0.0702826
3903	A	0.0795329	0.132973	0.0808773	0.126509	0.117025	0.172466	0.162756	0.26484	0.406286	0.138537	0.277245	0.746568	0.228312	0.471478
3912	A	0.0355334	0.0323844	0.0300563	0.043322	0.0424246	0.0482345	0.0251431	0.0290988	0.033565	0.0226319	0.0162653	0.0248039	0.0471841	0.0178887
3918	A	0.0474162	0.0422029	0.0377186	0.0482932	0.0573464	0.0739622	0.0358315	0.0453767	0.0454014	0.0361814	0.0430663	0.0250034	0.100769	0.0468656
3923	A	0.0656209	0.0802431	0.0421577	0.0870351	0.0679575	0.0906966	0.0575612	0.0632484	0.0725405	0.0571318	0.0550014	0.0540851	0.070039	0.0356623
3931	A	0.284478	0.291649	0.207941	0.411895	0.289891	0.284028	0.322286	0.334542	0.367151	0.295324	0.374971	0.476549	0.318193	0.404886
3937	A	0.490838	0.463566	0.307521	0.631679	0.409691	0.489007	0.408016	0.452614	0.399214	0.484351	0.452552	0.461819	0.533408	0.470077
3938	A	0.245358	0.239012	0.207126	0.364854	0.230927	0.311509	0.277917	0.290355	0.303858	0.310876	0.286642	0.359077	0.375333	0.382964
3940	A	0.121563	0.116533	0.0986816	0.212112	0.142965	0.205437	0.135256	0.140881	0.145885	0.111154	0.163685	0.157811	0.247158	0.140176
3942	A	0.132183	0.137058	0.104772	0.224066	0.155606	0.173586	0.133863	0.146577	0.145263	0.148812	0.117297	0.117368	0.197503	0.123058
3944	A	0.19569	0.17854	0.15038	0.29323	0.173497	0.233629	0.300382	0.267603	0.226581	0.335261	0.267963	0.286453	0.287012	0.379901
3947	A	0.143749	0.124109	0.0922201	0.187316	0.132523	0.181885	0.233938	0.252145	0.21135	0.254893	0.239554	0.278068	0.243271	0.294353
3949	A	0.128494	0.116784	0.094538	0.160992	0.115278	0.160834	0.25216	0.262974	0.248718	0.235872	0.216318	0.304701	0.248057	0.313866
3955	A	0.210208	0.17314	0.166288	0.226822	0.197828	0.165952	0.381917	0.391264	0.31866	0.396164	0.384979	0.420231	0.29907	0.579311
3957	A	0.114658	0.0938678	0.0916691	0.109933	0.0712577	0.131784	0.0772239	0.080632	0.0793966	0.108988	0.0963801	0.0673363	0.151665	0.0914004
3958	A	0.0439102	0.0430501	0.0448505	0.0530461	0.0562352	0.0848328	0.0638039	0.0635972	0.0695683	0.0905133	0.0911263	0.0508119	0.0966871	0.0747066
3960	A	0.0510408	0.0572628	0.0407593	0.0687436	0.0655634	0.0725702	0.080569	0.0929087	0.0848828	0.105796	0.0897418	0.0755548	0.100793	0.114862
3961	A	0.156978	0.131106	0.133127	0.157241	0.107429	0.14244	0.167678	0.140734	0.140359	0.182928	0.158258	0.10624	0.17433	0.154442
3967	A	0.370748	0.374121	0.300913	0.397864	0.253412	0.257479	0.389277	0.394443	0.55294	0.373426	0.347804	0.458891	0.280214	0.470434
3998	A	0.099093	0.0864339	0.0944356	0.114274	0.0434424	0.0514399	0.116812	0.166176	0.177711	0.095586	0.0706185	0.0782304	0.103338	0.179151
4041	A	0.0569365	0.048004	0.0423578	0.0626625	0.0611382	0.078707	0.0668429	0.0545592	0.0693001	0.0667042	0.0584737	0.0413978	0.117598	0.0622394
4042	A	0.0389639	0.0432499	0.0521405	0.0541621	0.0454426	0.071062	0.0523312	0.0597693	0.0459856	0.0484826	0.0449372	0.0447027	0.104345	0.0638666
4043	A	0.0382977	0.0348424	0.0233608	0.0439968	0.0448088	0.079888	0.018917	0.0201177	0.0276036	0.0186244	0.0268082	0.0236278	0.0821994	0.0240549
4045	A	0.0496689	0.0671461	0.0830845	0.0688478	0.0600538	0.0640518	0.214586	0.219378	0.280822	0.18907	0.206329	0.132345	0.0859736	0.152006
4048	A	0.0671744	0.0633851	0.0652258	0.0626989	0.0660657	0.073028	0.349444	0.363743	0.474284	0.319331	0.366276	0.321911	0.0686464	0.402395
4051	A	0.0272526	0.0268528	0.0208107	0.0309	0.0251623	0.0279085	0.345344	0.432977	0.455394	0.321072	0.388413	0.21932	0.0313264	0.189831
4057	A	0.0229029	0.0195476	0.0224271	0.0270373	0.0187381	0.0359824	0.249906	0.299481	0.294269	0.211808	0.277635	0.491196	0.0364763	0.460421
4068	A	0.0365206	0.0256385	0.02678	0.0403036	0.0355991	0.0282019	0.0735491	0.0892836	0.0923463	0.0735381	0.105238	0.0920787	0.0407652	0.0745021
4072	A	0.127581	0.117752	0.094796	0.147052	0.0890823	0.0979441	0.15995	0.226972	0.351581	0.196967	0.24932	0.250567	0.105174	0.158467
4080	A	0.38282	0.322261	0.257938	0.425488	0.353581	0.393162	0.319436	0.354307	0.376394	0.362138	0.392146	0.381028	0.340209	0.392856
4093	A	0.214257	0.162514	0.0913455	0.270902	0.161003	0.259483	0.54027	0.537662	0.587457	0.550503	0.597807	0.60805	0.298366	0.555346
4100	A	0.109664	0.0825054	0.0681926	0.17248	0.117157	0.116964	0.217217	0.204986	0.316814	0.217126	0.253851	0.305939	0.16172	0.305258
4122	A	3.01379	4.03431	5.71028	2.94756	6.18045	5.09884	1.75506	1.67925	1.74378	1.28608	1.73549	1.49956	3.84867	1.01697
4123	A	0.543812	0.601362	0.860966	0.540144	1.14104	1.66536	0.488223	0.566121	0.629347	0.406959	0.616301	0.676222	1.28376	0.411162
4152	A	0.0652821	0.107549	0.076365	0.0981693	0.0488339	0.0993756	0.132106	0.160236	0.158688	0.0709175	0.0930778	0.0966974	0.138987	0.119517
4165	A	0.107313	0.178827	0.209422	0.187808	0.131423	0.125115	0.14529	0.148889	0.195053	0.101291	0.103179	0.0984432	0.224911	0.125799
4167	A	0.0588028	0.0753066	0.116897	0.11509	0.0628232	0.055784	0.101735	0.114883	0.0917592	0.0824063	0.0788644	0.0764526	0.103461	0.0522548
4173	A	0.256295	0.230305	0.320847	0.294985	0.168311	0.176732	0.128645	0.179236	0.143737	0.154916	0.170807	0.183715	0.403308	0.199325
4181	A	0.197807	0.235008	0.190829	0.299368	0.217368	0.164733	0.122013	0.161241	0.138977	0.123124	0.130061	0.155256	0.273252	0.123178
4187	A	0.192621	0.233065	0.193434	0.215407	0.217566	0.136916	0.207584	0.216671	0.240599	0.181844	0.227881	0.15827	0.227472	0.106398
4198	A	0.157963	0.159682	0.0964536	0.162685	0.172509	0.293518	0.280841	0.227806	0.238303	0.190148	0.260328	0.274086	0.268233	0.186813
4200	A	0.104289	0.0862904	0.0740741	0.142593	0.136485	0.154734	0.198963	0.216213	0.191788	0.177318	0.242007	0.368494	0.171495	0.216989
4207	A	0.0367754	0.0585293	0.0325833	0.0609233	0.0592841	0.0532051	0.039414	0.0213774	0.0558062	0.0307882	0.0277162	0.0704526	0.0586203	0.0482305
4208	A	0.0382614	0.0421023	0.0447283	0.04461	0.0423259	0.084053	0.031286	0.0413695	0.0624064	0.0326348	0.0477906	0.0340216	0.0972704	0.0501575
4209	A	0.0857911	0.073433	0.080264	0.0888652	0.0702233	0.119487	0.0197723	0.041401	0.0515698	0.0446851	0.0312133	0.0361302	0.138067	0.0441138
4214	A	0.0858188	0.0893722	0.0714166	0.0910056	0.119916	0.103791	0.339587	0.440358	0.720447	0.213329	0.474746	0.418697	0.1659	0.340118
4215	a	0.102397	0.0883327	0.121757	0.108683	0.138726	0.175442	0.291971	0.432623	0.669929	0.268248	0.485255	0.347104	0.166338	0.329427
4219	A	0.1346	0.182469	0.181343	0.243691	0.205857	0.211671	0.2511	0.285285	0.323834	0.185478	0.266363	0.245576	0.30116	0.232141
4228	A	0.0900773	0.0660599	0.05499	0.126283	0.0887691	0.0966265	0.137243	0.189099	0.217825	0.121059	0.159372	0.110729	0.127705	0.0803276
4229	A	0.126488	0.11899	0.0818209	0.168375	0.121767	0.169627	0.105413	0.107613	0.170377	0.0759752	0.105624	0.0604879	0.173611	0.081984
4234	A	0.26603	0.279174	0.20264	0.406293	0.307049	0.304316	0.634246	0.738435	0.824082	0.521742	0.702436	0.729835	0.398812	0.510804
4239	A	0.286549	0.226925	0.175942	0.406556	0.316195	0.279335	0.243071	0.270864	0.242501	0.27439	0.213256	0.269142	0.367051	0.35687
4243	A	0.286458	0.271664	0.203362	0.440091	0.341437	0.180918	0.127059	0.162293	0.151353	0.127046	0.165886	0.141667	0.228055	0.137958
4246	A	0.159376	0.0991787	0.106659	0.237359	0.138124	0.174562	0.16695	0.210537	0.128089	0.179815	0.216863	0.271559	0.137924	0.180011
4248	A	0.179254	0.152951	0.0753502	0.232739	0.130528	0.106715	0.0880256	0.119115	0.087631	0.0831473	0.0971929	0.12657	0.0800034	0.089615
4250	A	0.0330761	0.0311249	0.0381528	0.0780862	0.0656486	0.0879964	0.041873	0.039266	0.0613388	0.0530215	0.0341375	0.0539635	0.0801836	0.0406091
4251	A	0.0454133	0.0279786	0.0408312	0.0616968	0.0404399	0.0638589	0.0386294	0.0344492	0.0463978	0.0384014	0.0387716	0.0496515	0.0776197	0.0419189
4252	A	0.0416005	0.0217357	0.0272851	0.0434526	0.0369487	0.0511557	0.0123359	0.0100069	0.0228106	0.0178197	0.015392	0.0142255	0.0623861	0.019656
4263	A	0.224646	0.238679	0.181981	0.416547	0.230975	0.229204	0.0746032	0.0601297	0.072024	0.0493509	0.049233	0.0773709	0.275191	0.0793932
4266	A	0.170563	0.166385	0.12611	0.302364	0.16439	0.182237	0.125282	0.108053	0.146022	0.0870605	0.128857	0.16755	0.223959	0.148833
4268	A	0.287263	0.239983	0.237618	0.384341	0.265322	0.292459	0.62203	0.643398	0.507855	0.540222	0.575269	0.651542	0.343937	0.558486
4269	A	0.443656	0.452696	0.37291	0.400198	0.428147	0.409448	1.07476	1.03041	1.04675	0.887079	0.903354	0.940428	0.461608	1.06994
4274	A	1.02001	0.9983	0.885753	0.904915	0.82477	1.0357	1.38722	1.44009	1.21743	1.25501	1.34311	1.38906	0.988563	1.27535
4275	A	0.330165	0.38724	0.262061	0.360163	0.325958	0.388052	0.788812	0.729341	0.688662	0.60317	0.631406	0.703179	0.447619	0.70547
4276	A	0.0529132	0.0594774	0.0695925	0.0868908	0.0981966	0.187913	0.10643	0.0933651	0.114805	0.0887213	0.0686769	0.097397	0.206312	0.120894
4277	A	0.0943007	0.0951799	0.0951475	0.116189	0.120459	0.350995	0.0476686	0.016381	0.0331649	0.0264543	0.0256579	0.0746626	0.388353	0.110849
4287	A	0.029593	0.0274014	0.0280752	0.0322757	0.0357109	0.0679679	0.0348934	0.0224219	0.0270386	0.024899	0.025639	0.0232702	0.0953705	0.0303897
4293	A	0.0434588	0.035837	0.0265837	0.0418433	0.0329743	0.05338	0.137253	0.145451	0.146605	0.108184	0.128949	0.123447	0.0524738	0.110458
4299	A	0.0438613	0.0548628	0.0388917	0.0436897	0.083404	0.0255605	0.13474	0.171596	0.276005	0.12081	0.182441	0.112064	0.0382134	0.121109
4302	A	0.0535346	0.0375137	0.0432399	0.0599748	0.0565258	0.0438954	0.0641949	0.0504295	0.103409	0.0721989	0.04069	0.0297524	0.0426213	0.0154973
4305	A	0.0443899	0.0478861	0.0571973	0.0513823	0.0496976	0.0448382	0.144997	0.133085	0.183839	0.143219	0.135862	0.112289	0.0600212	0.0625925
4306	A	0.0984635	0.0813517	0.0744239	0.0581494	0.0861655	0.132086	0.104888	0.136176	0.138126	0.0926424	0.106203	0.107951	0.116601	0.0871361
4308	A	0.136301	0.121557	0.123946	0.136104	0.101386	0.0745399	0.19995	0.200279	0.226244	0.163862	0.155496	0.0782377	0.105409	0.075675
4310	A	0.0933213	0.102457	0.105113	0.0767761	0.0907506	0.108535	0.255156	0.256636	0.400674	0.190347	0.237097	0.208925	0.122969	0.181741
4312	A	0.162821	0.166744	0.161002	0.186999	0.16622	0.181373	0.252539	0.262118	0.315764	0.176969	0.214315	0.109483	0.195131	0.0996134
4318	A	0.124511	0.0830535	0.125033	0.104615	0.121357	0.138313	0.193304	0.214705	0.276305	0.182821	0.195702	0.211172	0.197609	0.202831
4319	A	0.0649954	0.0820375	0.06813	0.101899	0.0939308	0.15674	0.0806798	0.106756	0.113353	0.060048	0.0466763	0.0886807	0.166443	0.0820042
4320	A	0.145368	0.198748	0.197074	0.18228	0.248943	0.403479	0.0936856	0.0898683	0.168887	0.086204	0.0945398	0.145164	0.391639	0.128837
4331	A	0.110513	0.0968564	0.0965128	0.11712	0.0832462	0.158877	0.27043	0.269687	0.263969	0.271461	0.318321	0.339576	0.197191	0.324263
4334	A	0.0424126	0.0407132	0.0269174	0.035524	0.0496524	0.0828064	0.120726	0.136804	0.10889	0.130189	0.0991358	0.121961	0.0968971	0.112425
4343	A	0.0481138	0.0390671	0.0450997	0.0676946	0.0435874	0.0949165	0.0326723	0.0363177	0.0389994	0.0293993	0.0388192	0.0251346	0.0935694	0.0235488
4357	A	0.138632	0.161468	0.131569	0.195825	0.125617	0.137896	0.0925675	0.0932188	0.106876	0.0801118	0.106698	0.0712237	0.134089	0.0637035
4358	A	0.282081	0.28905	0.248635	0.325681	0.266331	0.250376	0.133991	0.135384	0.153521	0.113158	0.156239	0.139695	0.226629	0.09247
4361	A	0.240894	0.226057	0.227439	0.294929	0.264372	0.322721	0.28848	0.351479	0.463641	0.245997	0.33799	0.426204	0.254344	0.316893
4364	A	0.507952	0.380293	0.380528	0.472441	0.350186	0.304493	0.278428	0.360776	0.377401	0.286326	0.286819	0.492566	0.320552	0.390964
4371	A	0.128094	0.122512	0.0919207	0.154806	0.132912	0.119943	0.157569	0.192568	0.174691	0.172866	0.175272	0.112043	0.121026	0.114535
4373	A	0.0807766	0.0996217	0.0846405	0.102976	0.0910038	0.0908936	0.104177	0.109623	0.12876	0.110212	0.121968	0.0794862	0.126807	0.090604
4374	A	0.041708	0.0442804	0.0367417	0.0475183	0.0302103	0.0579358	0.028178	0.0385731	0.0388931	0.0504217	0.0404576	0.0229148	0.0781555	0.0202496
4375	A	0.0319837	0.0189599	0.0274409	0.0432914	0.029151	0.0454049	0.0357602	0.026047	0.0416536	0.0182138	0.034657	0.0235119	0.0584537	0.0297685
4376	A	0.0705737	0.0468911	0.0582261	0.0996199	0.076885	0.29872	0.0283137	0.0199378	0.0201598	0.0241236	0.0167194	0.0438817	0.331542	0.0371542
4380	A	0.143179	0.103325	0.120552	0.109666	0.112043	0.117865	0.114268	0.13677	0.159559	0.0931942	0.108501	0.0633731	0.0925745	0.0706071
4383	A	0.110759	0.118304	0.112852	0.151847	0.133665	0.219449	0.375197	0.347754	0.281548	0.286369	0.288687	0.316614	0.199326	0.28851
4385	A	0.247859	0.234984	0.225102	0.284028	0.230537	0.268643	0.516966	0.514906	0.486478	0.438726	0.439567	0.51027	0.327206	0.42638
4389	A	0.166827	0.157009	0.151109	0.18345	0.126386	0.198965	0.447525	0.440944	0.354441	0.374723	0.372127	0.242109	0.302977	0.262708
4391	A	0.0745202	0.0698178	0.0930571	0.0835478	0.080635	0.1217	0.173351	0.191632	0.168648	0.150666	0.125572	0.111588	0.210854	0.130738
4392	A	0.09431	0.130831	0.142553	0.165786	0.185406	0.240198	0.102479	0.167135	0.140761	0.0800559	0.0725062	0.080592	0.290988	0.053986
4409	A	0.166617	0.137974	0.149685	0.205832	0.124371	0.186648	0.102759	0.0955601	0.115945	0.0815661	0.0823957	0.106928	0.252422	0.093826
4410	A	0.101299	0.116023	0.0985737	0.109133	0.0866541	0.15823	0.0864108	0.0671386	0.0998004	0.072489	0.0747542	0.0675917	0.242801	0.112757
4417	A	0.0440258	0.0549512	0.0256461	0.0327479	0.0285102	0.0397535	0.0507921	0.0426967	0.0511032	0.0432918	0.0218911	0.0441731	0.0554022	0.0551139
4419	A	0.0485871	0.0575794	0.0682701	0.0653786	0.0544631	0.0681645	0.0948871	0.101411	0.105668	0.082418	0.0766903	0.086054	0.0884921	0.0727812
4423	A	0.0517859	0.0449843	0.0466565	0.0501061	0.0569164	0.0814485	0.144595	0.153829	0.181387	0.0801054	0.116491	0.126144	0.10366	0.110508
4436	A	0.0478308	0.036328	0.0408016	0.0616345	0.0509728	0.0647422	0.0239029	0.0354772	0.0415432	0.0481232	0.0271448	0.0128263	0.0651406	0.0196538
4444	A	0.0467525	0.0550304	0.0451205	0.0544758	0.0717618	0.0759661	0.0316787	0.0389428	0.0536423	0.0231936	0.0365335	0.0158444	0.0698091	0.0272822
4459	A	0.0634168	0.0457732	0.0424647	0.103636	0.0801969	0.0780607	0.0440956	0.0279486	0.0245631	0.0278179	0.0231613	0.0323062	0.0946604	0.0307702
4462	A	0.05843	0.0588521	0.0452953	0.107755	0.0549562	0.0499637	0.0357721	0.0195841	0.0108619	0.0151835	0.0170818	0.0111508	0.0513169	0.0191219
4468	A	0.208147	0.172117	0.163183	0.232103	0.141133	0.139116	0.0538077	0.0663223	0.0556593	0.0383269	0.0724357	0.0254562	0.152598	0.0470602
4469	A	0.283522	0.200906	0.182165	0.256054	0.148171	0.185565	0.134587	0.125576	0.14021	0.130082	0.131448	0.0738007	0.19669	0.0871516
4472	A	0.120209	0.142556	0.198336	0.21435	0.251376	0.141283	0.0816353	0.0882275	0.100017	0.108823	0.0745169	0.0510151	0.146961	0.0764016
4474	A	0.173042	0.1667	0.0985316	0.193447	0.134968	0.179822	0.0836326	0.102124	0.0881648	0.118167	0.0579509	0.0680899	0.195788	0.0942238
4475	A	0.157032	0.128687	0.123199	0.160077	0.113869	0.125537	0.0908177	0.116312	0.110126	0.12501	0.0821625	0.107664	0.194609	0.110775
4479	A	0.0753147	0.0547293	0.0744925	0.0861192	0.0613788	0.0965406	0.0550411	0.0587899	0.0454196	0.0465789	0.0510969	0.0347505	0.0877787	0.0503336
4482	A	0.124528	0.174127	0.159548	0.221378	0.170966	0.193273	0.255071	0.22638	0.191371	0.217904	0.192332	0.107465	0.154607	0.0866456
4483	A	0.126161	0.155655	0.124768	0.152439	0.14271	0.178844	0.183307	0.174178	0.180429	0.140104	0.151123	0.088982	0.197983	0.0836147
4491	A	0.0950495	0.146311	0.215637	0.131677	0.166759	0.111305	0.0188509	0.0372154	0.0390993	0.040935	0.0326406	0.0438959	0.131628	0.0647086
4498	A	0.167207	0.147943	0.171628	0.18883	0.159275	0.125997	0.109859	0.108658	0.104638	0.0632582	0.100767	0.11245	0.0852031	0.105324
4502	A	0.303053	0.24532	0.241801	0.27062	0.27927	0.213306	0.329722	0.397999	0.434944	0.382566	0.435031	0.463357	0.165937	0.367903
4505	A	0.174319	0.157391	0.132558	0.210356	0.177875	0.220607	0.0766347	0.0905817	0.106396	0.0666694	0.093633	0.081118	0.213928	0.0510605
4506	A	0.205654	0.165877	0.205966	0.232967	0.211944	0.248568	0.0524527	0.056698	0.0980627	0.0528005	0.0496468	0.0560517	0.255661	0.0675152
4508	A	0.393336	0.377728	0.323725	0.45749	0.290573	0.409952	0.277984	0.336574	0.313555	0.318063	0.197673	0.218567	0.408145	0.298927
4512	A	0.407254	0.314695	0.284435	0.484885	0.264618	0.388657	0.473029	0.607606	0.777439	0.455605	0.712056	0.640895	0.362657	0.446042
4513	A	0.300311	0.306249	0.302831	0.322961	0.182983	0.364322	0.51695	0.619659	0.826653	0.568617	0.688191	0.958761	0.259838	0.784746
4518	a	0.372563	0.400967	0.446823	0.342508	0.295463	0.219417	0.423881	0.41093	0.426306	0.429805	0.379852	0.723936	0.299669	0.711411
4528	A	0.08967	0.0573405	0.0630182	0.0933748	0.0692813	0.0705094	0.0358355	0.0501025	0.0581088	0.0418918	0.0282945	0.0494606	0.119591	0.0277904
4530	A	0.109292	0.0867895	0.112404	0.133188	0.0772798	0.133816	0.0602087	0.0698425	0.1142	0.0776225	0.0815963	0.0803232	0.150103	0.071105
4539	A	0.271024	0.229952	0.195999	0.337527	0.245271	0.264515	0.344201	0.459043	0.621449	0.278205	0.548483	0.357844	0.401865	0.272389
4541	A	0.200385	0.171191	0.173627	0.256203	0.157913	0.22496	0.205511	0.194591	0.297448	0.204897	0.226584	0.253653	0.221209	0.170798
4543	A	0.117764	0.0890762	0.0875842	0.119863	0.0892543	0.10645	0.247864	0.271751	0.308731	0.245641	0.230822	0.243382	0.114699	0.287238
4548	A	0.0559216	0.0754844	0.0523294	0.108731	0.0623775	0.0621847	0.123499	0.149843	0.138825	0.165109	0.147527	0.117222	0.0724262	0.220733
4554	A	0.108127	0.0745621	0.0740278	0.123236	0.0870278	0.103183	0.0964353	0.127498	0.231635	0.0853213	0.127945	0.0838567	0.122995	0.0528148
4559	A	0.219056	0.188515	0.153713	0.220476	0.219064	0.156269	0.475549	0.479442	0.538968	0.413207	0.442752	0.218129	0.170916	0.148556
4563	A	0.144129	0.177655	0.179594	0.272674	0.1772	0.176205	0.12308	0.190286	0.275551	0.128205	0.232993	0.0979978	0.283962	0.0809834
4566	a	0.117353	0.116625	0.0802921	0.168785	0.090118	0.115762	0.0797788	0.140185	0.201835	0.0941933	0.108121	0.126527	0.158164	0.152818
4579	A	0.161288	0.16584	0.170449	0.225897	0.248158	0.178388	0.530322	0.575571	0.498399	0.56618	0.580537	0.561224	0.18503	0.436899
4584	A	0.0941445	0.10062	0.0597315	0.122838	0.0988748	0.108215	0.06491	0.0665573	0.0636151	0.0729802	0.0753225	0.0688983	0.142553	0.064914
4585	a	0.0608823	0.06128	0.0508639	0.0717708	0.0689991	0.104418	0.0381098	0.0581342	0.0439676	0.0337263	0.0651213	0.0352657	0.139521	0.0413669
4594	A	0.0539877	0.0595468	0.0429494	0.102259	0.0739987	0.0777847	0.0401623	0.0267383	0.0346214	0.0266274	0.0327822	0.030478	0.0980635	0.028721
4597	A	0.0785294	0.0957093	0.0812634	0.124385	0.0800021	0.0732657	0.0390233	0.0341045	0.0646578	0.0239491	0.0317557	0.039711	0.0800186	0.033407
4600	A	0.101947	0.101062	0.0896522	0.143489	0.0676582	0.108254	0.0897263	0.0746504	0.0796966	0.067274	0.0946983	0.0945805	0.134282	0.0598483
4602	A	0.0496312	0.048162	0.0535151	0.0719316	0.0393475	0.0671544	0.0855267	0.067701	0.0960342	0.0746589	0.0659281	0.0788942	0.0954509	0.09956
4605	A	0.0334821	0.0369598	0.0515516	0.0457294	0.0386403	0.0802252	0.0570044	0.027721	0.0712748	0.0364447	0.0250143	0.0614975	0.0718799	0.0358974
4606	A	0.0612865	0.0618755	0.0771418	0.0827381	0.0903712	0.1222	0.0510515	0.0493333	0.0611672	0.0488002	0.0438532	0.0474987	0.131573	0.0442357
4611	A	0.118785	0.105146	0.142896	0.124077	0.111693	0.123275	0.109627	0.144382	0.15443	0.143413	0.0939665	0.147532	0.182587	0.179575
4617	A	0.0372425	0.0474245	0.0361804	0.0467887	0.038694	0.0389953	0.0320474	0.0386623	0.031834	0.041665	0.0512984	0.0508405	0.0606934	0.0451264
4619	A	0.0502228	0.0536828	0.0282535	0.0703609	0.0423017	0.070275	0.0214451	0.0332769	0.0239933	0.0300992	0.0292357	0.0262946	0.0478938	0.024233
4621	A	0.0261001	0.0408507	0.0259989	0.0443937	0.0303909	0.0527587	0.00408424	0.00989273	0.0176767	0.0265904	0.0184683	0.0116643	0.046817	0.0212637
4630	A	0.65884	0.836066	1.17817	0.658939	1.2494	0.597831	0.497695	0.467822	0.422142	0.401004	0.494426	0.329443	0.830214	0.251516
4643	A	0.295962	0.216975	0.280988	0.303874	0.286853	0.287571	0.13997	0.146128	0.146419	0.13466	0.143447	0.0922084	0.354466	0.105936
4646	A	0.113273	0.101762	0.101362	0.117897	0.107502	0.131155	0.0769721	0.0663768	0.10545	0.0471346	0.0609739	0.0815457	0.162564	0.0555193
4650	A	0.139672	0.12772	0.165734	0.204958	0.199094	0.224091	0.180038	0.15763	0.142014	0.169822	0.13875	0.143129	0.312864	0.161962
4651	A	0.138407	0.148995	0.175908	0.198222	0.167892	0.247496	0.122627	0.0985646	0.15474	0.131176	0.136118	0.174365	0.324323	0.125365
4659	A	0.68269	0.57294	0.592296	0.799445	0.75836	0.687406	0.410354	0.420382	0.388223	0.438986	0.444562	0.466371	0.828516	0.484887
4660	A	0.2704	0.246098	0.175135	0.331985	0.284965	0.368089	0.17158	0.187695	0.171652	0.189132	0.191582	0.204442	0.456292	0.185867
4664	A	0.0980412	0.11754	0.10409	0.128809	0.171836	0.150754	0.237635	0.274419	0.53244	0.161646	0.340269	0.131618	0.150581	0.104225
4667	A	0.090645	0.0654499	0.0761294	0.0625266	0.101907	0.0705611	0.0971278	0.110644	0.131423	0.0851958	0.109618	0.0864484	0.115565	0.0737304
4676	A	0.107723	0.0833734	0.0776386	0.0786009	0.0713163	0.0931082	0.101076	0.0947306	0.13546	0.0934769	0.0838904	0.0810084	0.107849	0.0930441
4679	A	0.0380147	0.0189794	0.0321431	0.0414422	0.0404676	0.0384783	0.0353839	0.0393736	0.0363193	0.0222187	0.0283151	0.0340679	0.0667739	0.0409252
4682	A	0.0255858	0.0389429	0.0463077	0.0692858	0.0355059	0.0551342	0.0813822	0.106506	0.0776469	0.0873704	0.0727096	0.0519568	0.0612762	0.060353
4686	A	0.0518781	0.0476298	0.0606494	0.0690229	0.0779943	0.0919513	0.28031	0.244398	0.377723	0.21483	0.342254	0.449254	0.104996	0.206848
4687	A	0.0727019	0.0649472	0.0671033	0.0600018	0.0790068	0.0934108	0.168946	0.171954	0.235032	0.151008	0.202008	0.284241	0.0973131	0.190793
4695	A	0.0126052	0.0261519	0.0334789	0.0162681	0.0414062	0.0384502	0.15978	0.186499	0.177198	0.131954	0.175181	0.14183	0.0626174	0.120841
4696	A	0.0251822	0.0236333	0.0240616	0.0180473	0.023415	0.0442511	0.0429494	0.0406752	0.0412153	0.0287604	0.0336361	0.0825893	0.0585465	0.0938442
4700	A	0.0574262	0.0360993	0.0361141	0.0488325	0.0587745	0.0501615	0.0716817	0.0831007	0.126374	0.05282	0.119264	0.0977235	0.062884	0.102216
4702	A	0.029855	0.0265148	0.0298297	0.0293923	0.0221475	0.0779657	0.139549	0.185198	0.236181	0.117645	0.202031	0.145272	0.0710846	0.167218
4703	A	0.0411307	0.0315068	0.0406218	0.0348119	0.0428023	0.0732601	0.149195	0.161801	0.160818	0.0926071	0.143633	0.133388	0.0828445	0.111152
4712	A	0.15201	0.16673	0.163522	0.188334	0.202918	0.185977	0.124217	0.130856	0.148844	0.122115	0.186341	0.17142	0.172428	0.205502
4718	A	0.41123	0.398234	0.412718	0.474441	0.525355	0.438847	0.319131	0.331466	0.415307	0.333488	0.429131	0.315902	0.472544	0.325394
4719	A	0.155725	0.143171	0.135996	0.205757	0.191423	0.216063	0.134415	0.152907	0.13895	0.180689	0.156885	0.125457	0.212009	0.126277
4722	A	0.052691	0.0700665	0.0622883	0.0584545	0.0559952	0.100551	0.0594653	0.0885092	0.0876045	0.0712899	0.115594	0.0951621	0.0986433	0.0434267
4724	A	0.182867	0.167856	0.221786	0.126731	0.175845	0.161376	0.329033	0.419169	0.422962	0.354972	0.426183	0.316029	0.250683	0.261833
4729	A	0.685842	0.714529	0.819608	0.736478	0.713807	0.594465	0.733653	0.827312	0.571116	0.872107	0.682861	0.579197	0.897663	0.70279
4739	A	0.0956681	0.110233	0.156834	0.145128	0.146905	0.183584	0.129939	0.205198	0.267996	0.122801	0.227656	0.250171	0.227639	0.151169
4757	A	0.0697649	0.0529125	0.0660748	0.0742329	0.118449	0.0960471	0.13656	0.183096	0.220477	0.128993	0.171397	0.159243	0.107079	0.150121
4759	A	0.0461394	0.0333753	0.0391283	0.0745203	0.0507504	0.0571179	0.236729	0.320523	0.349427	0.189899	0.271387	0.2845	0.0721622	0.227629
4805	A	14.3386	17.6982	18.3162	19.0048	13.4267	16.7501	13.1737	15.5073	15.6069	19.9453	12.825	12.2621	18.4705	11.9485
4825	A	0.193954	0.153663	0.16623	0.323992	0.131322	0.209216	0.312233	0.404527	0.384464	0.339397	0.315753	0.361824	0.282918	0.361027
4852	A	0.503603	0.392311	0.350789	0.682391	0.390345	0.342974	0.131151	0.201295	0.198136	0.15506	0.19384	0.43417	0.609081	0.323883
4869	A	0.236148	0.220991	0.239638	0.255904	0.186993	0.155975	0.281477	0.368368	0.619912	0.249614	0.35472	0.373363	0.378596	0.439917
4887	A	0.141407	0.101932	0.109409	0.233841	0.0961219	0.0855356	0.179569	0.183501	0.20012	0.13522	0.187367	0.151624	0.186244	0.105888
4888	A	0.0545194	0.0802382	0.0994271	0.0919094	0.0810462	0.115095	0.150675	0.179509	0.259072	0.108628	0.20396	0.15709	0.16934	0.144304
4889	A	0.063873	0.0719135	0.0686732	0.0925999	0.0680422	0.10093	0.351673	0.419259	0.447084	0.239039	0.513797	0.410029	0.114183	0.314972
4904	A	0.0823578	0.0718869	0.058129	0.103749	0.064679	0.0831416	0.108238	0.114331	0.163932	0.126057	0.150367	0.193	0.0952319	0.121151
4905	A	0.0229947	0.0244802	0.0271766	0.0394413	0.0198558	0.0612532	0.0693012	0.0811172	0.0950334	0.0707526	0.0655484	0.0556237	0.061658	0.0717819
4906	A	0.0306238	0.0330866	0.0405476	0.0278733	0.0197538	0.0649925	0.0629356	0.0618949	0.0890381	0.0548537	0.0327123	0.114476	0.0739793	0.110639
4929	A	0.0626528	0.0815439	0.103842	0.0818729	0.0877768	0.13891	0.0912603	0.0955192	0.118182	0.0773824	0.0774293	0.105764	0.158451	0.0785307
4933	A	0.0992481	0.133758	0.156439	0.137404	0.185299	0.234954	0.298364	0.281507	0.332188	0.222287	0.336041	0.317244	0.188595	0.158996
4938	A	0.228537	0.168056	0.16534	0.155193	0.161867	0.316906	0.273499	0.253189	0.25001	0.202537	0.290751	0.281062	0.21764	0.179904
4950	A	0.0771396	0.0888284	0.0731177	0.11078	0.0990449	0.101199	0.127135	0.159823	0.182155	0.11955	0.172249	0.129815	0.159524	0.0868391
4951	A	0.137278	0.141382	0.111637	0.126592	0.11875	0.149098	0.243425	0.204159	0.226929	0.170754	0.25319	0.214221	0.199897	0.163389
4961	A	0.0758255	0.0610462	0.04954	0.0787126	0.0672879	0.0993673	0.152423	0.13992	0.198003	0.113255	0.147384	0.111601	0.126592	0.0792806
4962	A	0.0650981	0.0723943	0.0525448	0.0530692	0.0577772	0.118619	0.0514568	0.0656587	0.0637039	0.0486419	0.0536158	0.0404602	0.143856	0.0337981
4963	A	0.0256919	0.0663116	0.0456632	0.0444115	0.0665267	0.109416	0.0284424	0.0294087	0.0537228	0.0292992	0.0293365	0.0335298	0.104554	0.0339163
4966	A	0.0392985	0.0408654	0.0387007	0.0404694	0.0359688	0.058148	0.398824	0.365469	0.502851	0.27084	0.328459	0.28265	0.0716846	0.171423
4972	A	0.251272	0.222887	0.276692	0.321893	0.279979	0.253465	0.5406	0.690971	0.611481	0.508152	0.523498	0.385541	0.295567	0.278502
4974	A	0.583864	0.668588	0.833447	0.617197	0.608639	0.720999	0.497675	0.656754	0.603926	0.489222	0.530954	0.40508	0.878192	0.328476
4977	A	0.3621	0.326841	0.324855	0.359626	0.603837	0.538838	0.256624	0.267801	0.216433	0.238869	0.261577	0.173137	0.611205	0.137931
5002	A	0.0724533	0.0802627	0.033588	0.104639	0.0483419	0.102854	0.163358	0.218784	0.219799	0.133536	0.199938	0.121658	0.0931207	0.0835871
5006	A	0.293476	0.25036	0.26001	0.299483	0.254608	0.283312	0.340403	0.420708	0.451557	0.316714	0.311822	0.198494	0.164424	0.197177
5009	A	0.27451	0.165263	0.116613	0.209285	0.139306	0.250844	0.316215	0.278821	0.256293	0.260327	0.234702	0.287216	0.211146	0.242942
5011	A	0.221376	0.283587	0.293341	0.261409	0.305848	0.389685	0.223866	0.194926	0.100751	0.166205	0.174023	0.104357	0.37124	0.0816153
5014	A	0.10247	0.153673	0.130039	0.216726	0.297156	0.200275	0.191715	0.144813	0.119596	0.247078	0.211083	0.234986	0.364225	0.153942
5029	A	0.0523492	0.0386947	0.0133351	0	0	0.046332	0.0148112	0.040568	0.0670336	0.0414373	0.00898796	0.0357846	0.0198906	0.0596007
5033	A	0.0688705	0.0135281	0.0282686	0.0171174	0	0	0.0155039	0.00472634	0.0182789	0.0124494	0.0280308	0.00457708	0.0308071	0.0358846
5037	A	0.247777	0.1144	0.134933	0.162866	0.356436	0.170853	0.124472	0.172193	0.105541	0.0845804	0.096432	0.0896184	0.032967	0.0698362
5038	A	0.176341	0.202341	0.121249	0.0731261	0.240433	0.138145	0.195737	0.217467	0.207979	0.196425	0.217781	0.0709186	0.121655	0.118688
5039	A	1.47835	1.74118	1.77515	1.56775	1.49928	1.56415	0.35365	0.346629	0.355981	0.346551	0.235513	0.195555	1.17051	0.240766
5043	A	0.937896	0.515198	0.971429	0.693787	0.657895	0.949474	0.838818	0.744316	0.664595	0.53124	0.525513	0.246849	0.897561	0.420117
5051	A	0	0.147493	0.289017	0.421053	0.369004	1.03245	0.378716	0.160333	0.349502	0.314548	0.259023	0.2249	0.950119	0.228471
5053	A	0.202429	0.209205	0	0.277008	0	0.929368	0.296912	0.149514	0.370311	0.128041	0.265182	0.454219	0.102041	0.536049
5055	A	1.05708	0.444444	0.410678	1.81269	0.273224	0.972763	1.51141	1.61374	1.64402	1.69492	1.7437	2.57745	0.958466	2.52637
5056	A	0	0.917431	0.423729	0.632911	0.558659	0.207039	1.45386	1.75906	1.49049	2.30415	1.44763	2.16551	0.786517	2.30522

## Sheet: A>T
28s location	forward strand reference base	WT NaBH4 2-NH2-d-ATP HIV	75% WT NaBH4 2-NH2-d-ATP HIV	50% WT NaBH4 2-NH2-d-ATP HIV	25% WT NaBH4 2-NH2-d-ATP HIV	WT untreated 2-NH2-d-ATP HIV	WT untreated dNTPs HIV	WT NaBH4 d2-NH2-d-ATP SSIV	75% WT NaBH4 dNH2-ATP SSIV	50% WT NaBH4 2-NH2-d-ATP SSIV	25% WT NaBH4 2-NH2-d-ATP SSIV	WT untreated 2-NH2-d-ATP SSIV	WT untreated dNTPs SSIV	WT NaBH4 dNTPs HIV	WT NaBH4 dNTPs SSIV
5	A	1.4432	1.59277	0.962927	1.98226	1.84109	0.768344	0.734394	0.756811	0.506634	2.05931	1.45199	0.196464	0.575013	0.283019
10	A	0.756776	0.913409	0.843373	1.37278	0.78534	1.07709	0.295288	0.861326	0.262522	0.711499	0.718644	0.5431	0.324743	0.204678
12	A	0.32967	0.741229	0.257827	0.851343	0.28073	0.255553	0.134311	0.165035	0.0906399	0.103609	0.110509	0.0711961	0.233668	0.150505
15	A	0.395217	0.491642	0.551398	0.65625	0.629496	0.813697	0.142578	0.196404	0.209593	0.233385	0.269939	0.172739	0.413187	0.17364
17	A	0.168201	0.30891	0.223162	0.322716	0.352686	0.177477	0.0839572	0.0704424	0.111374	0.18226	0.123276	0.0974951	0.178359	0.0864168
25	A	0.110257	0.113095	0.114894	0.115687	0.0932954	0.107479	0.199324	0.181541	0.178622	0.379068	0.233463	0.195486	0.0664767	0.246054
33	A	0.143634	0.0980454	0.083952	0.103878	0.0260206	0.0317624	0.0414022	0.0443376	0.0409326	0.0448055	0.0180496	0.0199572	0.0882493	0.0267889
34	A	0.0641655	0.107318	0.0816431	0.103995	0.0337942	0.0112965	0.121112	0.141082	0.0705456	0.127547	0.0201086	0.0221049	0.0684932	0.0950981
38	A	0.0773259	0.0640313	0.0592094	0.087635	0.0655171	0.0216325	0.0901562	0.0851191	0.0882639	0.102258	0.0759662	0.034713	0.078698	0.0445261
39	A	0.0852928	0.082203	0.0696238	0.131336	0.0273761	0.0211782	0.0885223	0.108068	0.0853745	0.103103	0.0730343	0.0391226	0.0800567	0.0518403
42	A	0.0580664	0.0516022	0.0474209	0.0669948	0.0358697	0.0167864	0.032889	0.0255032	0.0185103	0.0247647	0.0176134	0.00497834	0.0473065	0.0184191
44	A	0.0726274	0.0840774	0.0548465	0.070545	0.0116842	0.0260578	0.0357035	0.0477127	0.0222435	0.0455112	0.0213712	0.00239223	0.0604404	0.0678665
47	A	0.0752622	0.0584366	0.0544697	0.102257	0.0300933	0.0449035	0.0503309	0.0454804	0.0372805	0.0475116	0.0233219	0.0235983	0.0627549	0.0373162
51	A	0.226261	0.234719	0.175513	0.311771	0.160068	0.140411	0.16625	0.172326	0.148744	0.149792	0.180469	0.164987	0.177999	0.174261
56	A	0.162492	0.140979	0.140423	0.217926	0.134892	0.131298	0.142752	0.149703	0.200446	0.147812	0.181899	0.14976	0.153656	0.104624
59	A	0.149092	0.11794	0.114101	0.128575	0.084609	0.0698343	0.106777	0.151241	0.172255	0.103385	0.123774	0.0600666	0.0721178	0.0850021
61	A	0.122233	0.128198	0.124588	0.125537	0.095358	0.0794263	0.0853495	0.0963036	0.0712679	0.108108	0.0781731	0.0396749	0.142007	0.075003
62	A	0.0880389	0.107406	0.0942725	0.1546	0.0704374	0.0689117	0.137195	0.116881	0.0997027	0.119471	0.107151	0.0628283	0.15594	0.104572
64	A	0.156261	0.164022	0.141839	0.170208	0.110621	0.0944536	0.0475785	0.0578646	0.0473921	0.0493678	0.0393861	0.0393097	0.166688	0.0389874
65	A	0.189733	0.185571	0.165982	0.211313	0.110761	0.0709433	0.048734	0.0656268	0.0362769	0.0549701	0.0513611	0.0359806	0.187119	0.0528979
66	A	0.145493	0.146442	0.136786	0.160398	0.110554	0.0746778	0.0616023	0.0828654	0.045769	0.0719962	0.0395284	0.030873	0.150814	0.0593824
69	A	0.172143	0.178552	0.148148	0.203114	0.0422611	0.0380542	0.0543413	0.0424416	0.0531251	0.0458115	0.0461856	0.013685	0.108489	0.0406482
70	A	0.125785	0.117286	0.101716	0.119466	0.0697698	0.0419252	0.11272	0.107461	0.173428	0.106032	0.110329	0.0494615	0.162802	0.0673591
73	A	0.0831133	0.100525	0.131539	0.115661	0.0770058	0.113311	0.149657	0.158073	0.17855	0.145476	0.153938	0.0945334	0.247194	0.108194
76	A	0.134966	0.126953	0.127327	0.150298	0.0514297	0.0712183	0.0809866	0.0846216	0.0809253	0.0912299	0.0407745	0.0484639	0.209094	0.0944468
84	A	0.0717319	0.0570031	0.0666037	0.0566629	0.0205453	0.0360961	0.0476154	0.0479547	0.0319801	0.0269698	0.0153719	0.0113031	0.0639299	0.0420995
87	A	0.0944408	0.0920271	0.093055	0.108587	0.0613022	0.0528055	0.061886	0.0681678	0.060781	0.0766685	0.0536451	0.0413301	0.0632378	0.0541184
88	A	0.129927	0.135486	0.112445	0.132579	0.123144	0.104259	0.0998922	0.0819568	0.0867159	0.102922	0.0852563	0.027796	0.0962742	0.0653675
94	A	0.170522	0.165567	0.111155	0.170943	0.07268	0.082818	0.0395082	0.0339233	0.0442929	0.0449403	0.0332893	0.0170615	0.12419	0.0348493
98	A	0.140546	0.164865	0.0990237	0.147606	0.0541042	0.0518144	0.0255058	0.0407375	0.023824	0.0434657	0.0283357	0.0305522	0.096529	0.0226568
99	A	0.069931	0.096782	0.0738446	0.136994	0.065159	0.0341831	0.0732653	0.0830703	0.0804419	0.0817607	0.0630329	0.0500378	0.0791862	0.0698752
101	A	0.144555	0.117484	0.125089	0.139951	0.0751821	0.0821664	0.0873698	0.102849	0.147553	0.0952898	0.134012	0.143924	0.127478	0.109581
105	A	0.0475324	0.0425643	0.0446356	0.0565766	0.0261945	0.0262219	0.0437775	0.0511253	0.0588109	0.0445246	0.0467342	0.0485882	0.0424395	0.0499793
106	A	0.0428821	0.0496589	0.0460898	0.042044	0.0300658	0.0305606	0.0711606	0.0439094	0.0711667	0.0725367	0.0503393	0.0269513	0.061313	0.0548039
108	A	0.0459379	0.0618585	0.0593231	0.0755632	0.0294985	0.0289821	0.0636685	0.0690411	0.0585456	0.0605306	0.0445902	0.0453956	0.0421493	0.062396
113	A	0.0736803	0.0489584	0.0637177	0.0762685	0.0379893	0.0220424	0.0875876	0.0710089	0.1004	0.0967161	0.0655267	0.0782229	0.0809457	0.0672632
120	A	0.0711244	0.0695306	0.0684417	0.0595297	0.0115001	0.0120527	0.0434471	0.0381369	0.0537662	0.0453988	0.0165277	0.0219291	0.037679	0.0486948
121	A	0.0897834	0.0857066	0.0726501	0.0703067	0.012629	0.0143707	0.047446	0.0517695	0.0376783	0.0538871	0.016591	0.0242633	0.0606604	0.0469345
147	A	0.0397099	0.0329116	0.0370751	0.0488771	0.0266167	0.0286385	0.0447294	0.042104	0.03593	0.0345342	0.0180388	0.034207	0.0145836	0.0290899
149	A	0.046983	0.0462658	0.0502919	0.0496798	0.0231523	0.0188424	0.0547475	0.0416693	0.043508	0.0483086	0.0187767	0.0199545	0.0190554	0.0488116
158	A	0.0616389	0.0448171	0.0452306	0.0529421	0.012186	0.0173511	0.0761071	0.0761894	0.0901603	0.0655681	0.0384629	0.0298618	0.0436	0.0558893
162	A	0.0462673	0.044586	0.0345979	0.0658541	0.0231649	0.0079674	0.0536774	0.0701204	0.0641864	0.061947	0.0429528	0.0328299	0.0272944	0.0479263
163	A	0.0570942	0.064376	0.062024	0.0846414	0.0199605	0.0177334	0.0673433	0.0876289	0.0721447	0.0543838	0.0379232	0.0385164	0.0564721	0.0506667
165	A	0.117253	0.100412	0.0997104	0.126094	0.0931776	0.0778931	0.11935	0.158946	0.153437	0.105346	0.0836282	0.0906147	0.139751	0.0746287
197	A	0.0613874	0.104028	0.0750665	0.0948513	0.105074	0.0458537	0.0969816	0.103211	0.102012	0.074719	0.10699	0.0693866	0.0470784	0.074159
198	A	0.0573935	0.0412566	0.0432388	0.0682511	0.0268484	0.0252363	0.0523118	0.0561565	0.0521083	0.0656103	0.0407342	0.0280326	0.0487453	0.0425206
208	A	0.1149	0.119102	0.0986089	0.141411	0.0619259	0.027907	0.0575555	0.0608777	0.0520044	0.0520291	0.0312059	0.0273776	0.1055	0.0364644
212	A	0.123758	0.11638	0.113382	0.156158	0.090167	0.0584283	0.256187	0.305558	0.414886	0.217604	0.270303	0.386193	0.0773395	0.251106
218	A	0.093622	0.0911577	0.0500226	0.0950993	0.0480467	0.0507082	0.18826	0.18224	0.170545	0.130077	0.136007	0.149518	0.0945804	0.16129
227	A	0.173685	0.189948	0.130814	0.170611	0.124586	0.0639613	0.107916	0.115825	0.109703	0.0967342	0.0917382	0.065743	0.113246	0.0917665
235	A	0.224335	0.189136	0.145282	0.288725	0.1271	0.0674704	0.0607926	0.0961199	0.105749	0.0687209	0.0619628	0.0332723	0.0885317	0.0807777
243	A	0.0880255	0.115638	0.0746344	0.0866317	0.0586846	0.0394471	0.0799133	0.079696	0.115116	0.0965906	0.0528089	0.0662674	0.0748831	0.0743672
279	A	0.0872321	0.104875	0.166607	0.119225	0.123491	0.0995563	0.100635	0.102404	0.0982125	0.0778196	0.0679202	0.0750847	0.123374	0.0835921
295	A	0.109696	0.110514	0.0989737	0.131967	0.0494029	0.0242864	0.110012	0.0912862	0.0731239	0.112265	0.0602368	0.0394698	0.0715468	0.0622399
296	A	0.0949098	0.0941082	0.084451	0.105215	0.0286893	0.0259292	0.0678134	0.0721029	0.0407101	0.0604025	0.0149815	0.0129737	0.0793699	0.0457497
300	A	0.160641	0.139207	0.136057	0.201862	0.0343673	0.0265103	0.12466	0.120719	0.165636	0.156393	0.0905027	0.0894353	0.113102	0.0917885
305	A	0.0488043	0.0255278	0.0248212	0.0320911	0.0247078	0.0269048	0.0371727	0.0561129	0.050679	0.0296116	0.0513596	0.0334375	0.0506807	0.0348444
306	A	0.0436304	0.0487225	0.0424562	0.0602698	0.0325106	0.0339659	0.0305985	0.063056	0.0429749	0.0414674	0.0442788	0.0351635	0.0571639	0.0383777
307	A	0.112146	0.0930964	0.0738784	0.127673	0.0685589	0.0619087	0.0598396	0.0397391	0.037783	0.0651138	0.0300004	0.0250861	0.0660045	0.0348468
317	A	0.104205	0.0958918	0.083272	0.125779	0.0977361	0.0584515	0.0531406	0.0523517	0.0369257	0.0550222	0.0276928	0.0174095	0.0678485	0.0353945
318	A	0.122369	0.0948492	0.0820562	0.146396	0.072755	0.06305	0.0479827	0.0262493	0.0304189	0.0392322	0.0306946	0.0156956	0.0632179	0.0266217
319	A	0.101291	0.087538	0.102522	0.107223	0.0663457	0.053745	0.0427396	0.0401345	0.0438393	0.0582081	0.0219574	0.00873317	0.0633469	0.0267504
324	A	0.130534	0.146998	0.089357	0.152537	0.083323	0.116359	0.12492	0.157641	0.149543	0.108434	0.113031	0.0720259	0.136195	0.0702038
328	A	0.146592	0.135931	0.0971826	0.130711	0.100779	0.0383494	0.0882304	0.11439	0.110431	0.0940158	0.0619751	0.0404219	0.080885	0.0616366
329	A	0.0930225	0.0682658	0.0689495	0.087859	0.0572665	0.0330856	0.109754	0.103155	0.140995	0.0675524	0.0776603	0.0349721	0.050574	0.0364073
334	A	0.127852	0.10725	0.112582	0.109831	0.103089	0.0851352	0.116682	0.169131	0.167438	0.10152	0.099409	0.109451	0.0892966	0.0963797
335	A	0.112603	0.0832462	0.126698	0.134167	0.0760949	0.0549909	0.0867386	0.112409	0.151205	0.0916422	0.0984844	0.0867246	0.071087	0.0470078
336	A	0.0904109	0.098101	0.0661348	0.105515	0.0561514	0.0443898	0.034138	0.0344537	0.0339536	0.0506492	0.025786	0.0306507	0.0858887	0.0268179
338	A	0.123954	0.116472	0.169237	0.12356	0.110315	0.0789684	0.220008	0.261962	0.249692	0.21772	0.251985	0.131369	0.155272	0.134318
344	A	0.213485	0.217001	0.223643	0.238219	0.24386	0.186741	0.111982	0.119319	0.128913	0.122974	0.0980015	0.0891553	0.193591	0.0933565
347	A	0.151434	0.140826	0.135583	0.17931	0.111592	0.124413	0.0821445	0.0858023	0.10068	0.0916463	0.0982782	0.097075	0.159227	0.0827555
349	A	0.185262	0.162879	0.157534	0.205595	0.12071	0.109092	0.123177	0.11781	0.124192	0.11576	0.121618	0.152681	0.136622	0.10801
353	A	0.135392	0.112101	0.114784	0.113866	0.0975117	0.0908214	0.272279	0.307168	0.277364	0.2485	0.293872	0.24929	0.134428	0.261062
355	A	0.106288	0.096892	0.0925915	0.123531	0.0549621	0.0363609	0.203702	0.272607	0.235127	0.204465	0.191532	0.308799	0.069987	0.232229
359	A	0.0499018	0.0591342	0.0462778	0.0610415	0.0485093	0.0446314	0.0793392	0.076599	0.0811727	0.0632091	0.0868347	0.0529297	0.0583021	0.0730131
360	A	0.0673705	0.0693332	0.0666018	0.0755013	0.0503715	0.0329625	0.104581	0.0863149	0.0904919	0.101276	0.052638	0.0217652	0.0548647	0.0941331
362	A	0.0859859	0.0623068	0.0616333	0.0861571	0.0658812	0.0538592	0.0340804	0.0103733	0.0230203	0.026154	0.0351087	0.0192885	0.075303	0.0222901
363	A	0.0953194	0.0708015	0.0744816	0.0985532	0.0532819	0.0483974	0.0344149	0.033186	0.0546656	0.0544285	0.0249911	0.024966	0.0569947	0.0427081
366	A	0.159656	0.127842	0.103654	0.140976	0.0555752	0.0427858	0.0787174	0.0529408	0.0596418	0.034087	0.0184456	0.044025	0.0909395	0.0551122
371	A	0.16155	0.157032	0.111516	0.209229	0.0754437	0.0595667	0.156936	0.16879	0.113941	0.193654	0.132953	0.0665132	0.0830026	0.0774499
372	A	0.142754	0.128952	0.0796907	0.13766	0.0616507	0.0570959	0.0801343	0.0653782	0.0691698	0.0713853	0.0656257	0.0333239	0.0668423	0.0532154
376	A	0.0671736	0.0631898	0.0449107	0.050225	0.0646339	0.0568142	0.0529729	0.0404907	0.0420816	0.0486281	0.0357054	0.0498232	0.0361182	0.0330071
377	A	0.0530535	0.0496692	0.025621	0.0696564	0.0468117	0.0469114	0.0643399	0.0599556	0.0406111	0.0618265	0.0338989	0.0284556	0.0367345	0.0406866
378	A	0.0652219	0.0502976	0.0488302	0.0693411	0.0415037	0.0150635	0.0698026	0.037324	0.0557585	0.043996	0.0266605	0.00472791	0.0340548	0.0462401
383	A	0.08384	0.0693481	0.0422093	0.100598	0.0873277	0.0320043	0.010963	0.0100345	0.0133763	0.0183663	0.0238249	0.00228222	0.0350722	0.00559472
384	A	0.085329	0.0783271	0.0548769	0.0747061	0.0814867	0.0212857	0.039131	0.0338195	0.0421607	0.0333857	0.0367567	0.0248234	0.0401847	0.0166815
385	A	0.0519277	0.0607061	0.0484008	0.080873	0.0531446	0.0212416	0.0416174	0.0574825	0.0537698	0.0581532	0.0232477	0.0112902	0.0355942	0.0389755
386	A	0.0494237	0.0452705	0.0312047	0.0485267	0.0277413	0.0105861	0.0640487	0.0571405	0.0679756	0.0564396	0.0246719	0.0178831	0.034078	0.0388781
388	A	0.144702	0.138787	0.101464	0.162732	0.0710108	0.0686496	0.0662937	0.0471058	0.0390829	0.0478574	0.0262192	0.0199058	0.0612453	0.0349348
389	A	0.121191	0.130991	0.0880167	0.15052	0.0993881	0.0526039	0.0606324	0.0854713	0.0596334	0.0584597	0.029325	0.0352508	0.0617256	0.0494216
395	A	0.215938	0.249581	0.200388	0.264175	0.165976	0.0735438	0.0547743	0.0645708	0.0418612	0.085387	0.0333095	0.0213853	0.115338	0.0396047
396	A	0.174316	0.20124	0.194429	0.228386	0.111983	0.0662983	0.161029	0.184928	0.210664	0.15006	0.15047	0.150554	0.124667	0.117991
398	a	1.18559	1.25959	1.18547	1.2054	1.05662	0.743504	0.192849	0.192324	0.21643	0.235239	0.143326	0.14309	0.855062	0.120362
400	a	0.247618	0.2535	0.247988	0.278588	0.228301	0.159112	0.290334	0.374782	0.427244	0.284543	0.280687	0.226383	0.229668	0.220677
402	A	0.0975868	0.0909628	0.0874791	0.106792	0.0641408	0.0495427	0.0564587	0.122136	0.115751	0.0840931	0.0921926	0.0945314	0.0524125	0.0779024
407	A	0.070414	0.0781108	0.0810025	0.0829785	0.0772175	0.0957342	0.0288659	0.0366513	0.0421242	0.0485523	0.033345	0.0498392	0.101045	0.0545477
408	A	0.235895	0.261572	0.210697	0.25408	0.214646	0.168254	0.156609	0.111748	0.142872	0.118361	0.126564	0.159057	0.273791	0.192622
410	A	0.17179	0.174015	0.180438	0.18267	0.221219	0.165431	0.382674	0.380035	0.397976	0.25	0.379313	0.363983	0.208016	0.314022
418	A	0.183767	0.201239	0.129418	0.187694	0.104092	0.151149	0.0930393	0.0848701	0.0857674	0.0880514	0.0485839	0.057323	0.192959	0.0470732
419	A	0.141686	0.113727	0.123251	0.157296	0.122574	0.116553	0.0532802	0.0458109	0.0396215	0.0737476	0.0233008	0.0306312	0.143573	0.067903
420	A	0.124599	0.0945258	0.089941	0.130154	0.10658	0.0979694	0.101168	0.0650481	0.0680434	0.0823954	0.0356996	0.0130901	0.115534	0.04914
426	A	0.121487	0.110766	0.137319	0.138684	0.0829592	0.0677822	0.456174	0.429307	0.42775	0.423684	0.252231	0.380377	0.140249	0.44288
427	A	0.100154	0.0767859	0.0879954	0.111414	0.0508505	0.0370522	0.0863698	0.109818	0.120325	0.0876424	0.0892904	0.0401505	0.0552651	0.0370233
429	A	0.099449	0.116625	0.0938983	0.0803286	0.0438091	0.0370696	0.0823908	0.0898524	0.103486	0.0624102	0.0812979	0.0546663	0.0672131	0.0519913
433	A	0.103598	0.074666	0.142248	0.091094	0.0533417	0.0456271	0.289285	0.281409	0.306011	0.283003	0.23778	0.149562	0.074408	0.205897
434	A	0.103498	0.113998	0.1454	0.0855326	0.0623551	0.0636311	0.166897	0.190573	0.197796	0.179914	0.122352	0.104798	0.0808492	0.0843407
435	A	0.115393	0.132443	0.164036	0.115908	0.128483	0.146603	0.134559	0.118578	0.142051	0.0988081	0.133566	0.0989988	0.128217	0.0887998
452	A	0.0767089	0.0554369	0.0943231	0.0717792	0.0476149	0.0788855	0.098534	0.080183	0.0906556	0.0819475	0.0655351	0.0633691	0.103491	0.101517
463	A	0.0931282	0.103932	0.0948938	0.0730643	0.109343	0.0508324	0.110765	0.0810568	0.111132	0.0817833	0.0646384	0.0670852	0.0893915	0.0953619
466	A	0.109934	0.142688	0.151783	0.0947368	0.175313	0.125612	0.126812	0.112115	0.0790587	0.100998	0.0307593	0.0327756	0.0771927	0.111438
470	A	0.0731007	0.0567195	0.094105	0.0772588	0.0253421	0.0154006	0.101097	0.0789889	0.0805545	0.102646	0.0470454	0.047272	0.109062	0.0949137
471	A	0.0879808	0.0814219	0.13074	0.0925906	0.0321806	0.0197044	0.139414	0.131146	0.0932095	0.13108	0.0444202	0.06267	0.0805935	0.129025
509	A	0.0728332	0.0991539	0.115117	0.137813	0.0387273	0.0270431	0.0589922	0.0887019	0.0758223	0.070497	0.0447538	0.0556966	0.0630863	0.0554093
535	A	0.202545	0.172277	0.161272	0.240525	0.135054	0.0978101	0.11101	0.102356	0.142597	0.0402529	0.135492	0.0803273	0.154751	0.0551908
543	A	0.348171	0.300896	0.362298	0.317901	0.237709	0.149231	0.196353	0.219716	0.346082	0.164191	0.284951	0.280029	0.32972	0.151043
586	A	0.417335	0.276091	0.268978	0.383676	0.228938	0.30896	0.307143	0.260049	0.478238	0.225791	0.434812	0.37037	0.214869	0.246496
649	A	0.193784	0.151745	0.185297	0.14283	0.122764	0.127975	0.10757	0.0918309	0.100663	0.112406	0.0981368	0.0762916	0.139552	0.0538613
660	A	0.0246553	0.0464851	0.0334164	0.0391976	0.0201845	0.0177848	0.0536244	0.0826548	0.121178	0.0477783	0.0933063	0.0800664	0.0315464	0.0687481
667	A	0.0898489	0.0868695	0.0806578	0.0900167	0.0663853	0.046919	0.0777523	0.0632798	0.116667	0.0534809	0.0706402	0.0569268	0.0751358	0.059389
686	A	0.121452	0.114906	0.124744	0.121619	0.0985257	0.0619648	0.20553	0.161007	0.132214	0.202677	0.0709451	0.0911349	0.184553	0.198528
692	A	0.127623	0.0958281	0.0956348	0.123329	0.0535753	0.0422933	0.13578	0.13264	0.117027	0.128765	0.0728037	0.0634027	0.103079	0.102096
711	A	0.0526702	0.0649092	0.0637533	0.078901	0.0514042	0.0486112	0.0509615	0.0468158	0.0791392	0.0589424	0.0712267	0.084299	0.0904528	0.0575606
723	A	0.118864	0.110664	0.149661	0.192375	0.118925	0.108013	0.117164	0.110777	0.106608	0.131643	0.120952	0.152903	0.165293	0.125149
732	A	0.148667	0.158239	0.173255	0.170798	0.193311	0.131004	0.169642	0.194208	0.186608	0.162174	0.152831	0.135672	0.141251	0.117686
733	A	0.149002	0.146943	0.172542	0.142124	0.151179	0.158284	0.11427	0.113889	0.128582	0.0859799	0.0906475	0.101927	0.152577	0.0786541
746	A	0.0946896	0.092532	0.122092	0.135318	0.0815791	0.0670248	0.0954226	0.118129	0.084346	0.109262	0.0723152	0.0806529	0.0866266	0.0965505
747	A	0.121112	0.153636	0.150814	0.15124	0.117271	0.0922823	0.150356	0.163911	0.160172	0.157864	0.134042	0.125772	0.115028	0.161514
832	A	0.114424	0.0860585	0.124588	0.121036	0.113025	0.100333	0.0742786	0.0764502	0.0814875	0.0825738	0.119558	0.0926761	0.0777745	0.0804
887	A	0.144712	0.121168	0.14595	0.128869	0.0804805	0.0735509	0.0689553	0.080713	0.0564063	0.0657823	0.0573348	0.0392522	0.0961302	0.0537205
891	A	0.147251	0.140444	0.109203	0.117009	0.0754443	0.0781841	0.0817229	0.0760856	0.0801234	0.0585361	0.0743329	0.0502386	0.10504	0.0869057
892	A	0.118737	0.118987	0.0850731	0.139399	0.0677565	0.0469107	0.054674	0.0542522	0.0819085	0.0461724	0.0567574	0.0417564	0.0944774	0.0548392
893	A	0.120806	0.100986	0.126883	0.0951435	0.0405052	0.0482327	0.0553144	0.0461514	0.0887499	0.0313242	0.0593307	0.0436673	0.0537299	0.0596184
903	A	0.0577586	0.0611368	0.0653462	0.0712042	0.0479452	0.0376927	0.0457294	0.0515451	0.0692281	0.0546115	0.0471546	0.0598281	0.0608384	0.0433866
909	A	0.189335	0.20488	0.247643	0.230291	0.169492	0.159288	0.23173	0.248651	0.255841	0.271692	0.270477	0.244105	0.167454	0.211575
911	A	0.193182	0.136836	0.155187	0.179805	0.0868791	0.0961457	0.212362	0.231085	0.327329	0.200754	0.24057	0.29215	0.182661	0.216685
923	A	0.132458	0.117277	0.102135	0.153778	0.0911446	0.0963124	0.105817	0.115012	0.139204	0.0855348	0.133582	0.129481	0.121547	0.0899183
926	A	0.171946	0.115081	0.11797	0.174023	0.0871606	0.0695862	0.102747	0.0944753	0.0946989	0.0962799	0.110518	0.0916908	0.133529	0.115368
929	A	0.0905674	0.102615	0.0897837	0.100039	0.09331	0.0773683	0.0824932	0.076535	0.0898835	0.0718549	0.0850197	0.0519018	0.123156	0.069467
937	A	0.144498	0.110579	0.144608	0.131933	0.0794185	0.073007	0.0843647	0.0836313	0.0937303	0.066366	0.0605119	0.0495324	0.113524	0.0788587
938	A	0.103587	0.0970219	0.11134	0.11835	0.0424894	0.0480621	0.0891026	0.108395	0.0851745	0.0827036	0.0578657	0.067651	0.0890199	0.0952656
950	A	0.162703	0.126878	0.0861603	0.170178	0.0577897	0.0577968	0.0860882	0.107877	0.0869849	0.0932955	0.0762824	0.0844274	0.107525	0.0787479
954	A	0.139492	0.130051	0.123157	0.138955	0.0925241	0.0614651	0.14128	0.172663	0.150292	0.0963527	0.179804	0.18303	0.11152	0.133895
958	A	0.0986087	0.122831	0.088497	0.119257	0.108947	0.0949278	0.0833089	0.104698	0.0872011	0.0922682	0.110029	0.0739901	0.11607	0.0630486
960	A	0.127358	0.130105	0.12635	0.133172	0.148193	0.114793	0.242134	0.253672	0.307018	0.196778	0.374996	0.355391	0.137907	0.217328
994	A	0.105105	0.0835771	0.139821	0.122526	0.109548	0.0942348	0.0708215	0.117497	0.129462	0.0742569	0.102966	0.0923012	0.152585	0.0686538
1006	A	0.0528088	0.048841	0.0522314	0.0591273	0.0302663	0.0371737	0.0735032	0.0501537	0.0467388	0.0548639	0.0537864	0.0559923	0.0209582	0.07034
1007	A	0.0570125	0.0648385	0.0470063	0.0643734	0.0344234	0.014379	0.0483264	0.0828862	0.0862994	0.061206	0.0315575	0.0725095	0.0594001	0.0847631
1017	A	0.0828402	0.093625	0.0893017	0.102284	0.105579	0.0690131	0.0631567	0.0760027	0.0948289	0.0578842	0.0499858	0.0677564	0.108557	0.0582427
1072	A	0.112158	0.149988	0.187313	0.143055	0.108481	0.0745038	0.143587	0.208249	0.222568	0.103693	0.145095	0.147154	0.164483	0.100131
1081	A	0.079466	0.0647033	0.0950664	0.09942	0.0460295	0.0789133	0.0414406	0.0513286	0.0680034	0.0617832	0.0430331	0.0431788	0.0842597	0.0461555
1089	A	0.104485	0.128495	0.130068	0.148162	0.0750706	0.0667305	0.0721306	0.108458	0.105604	0.0844183	0.0572776	0.0722684	0.0894204	0.0955744
1100	A	0.323121	0.295209	0.299297	0.378384	0.227843	0.270954	0.129549	0.140995	0.179459	0.083716	0.123132	0.130751	0.35884	0.0929656
1130	A	0.165929	0.127058	0.194588	0.216716	0.188247	0.113996	0.112025	0.130142	0.106728	0.0704882	0.101619	0.146101	0.2814	0.160621
1169	A	0.0970271	0.0637755	0.147862	0.0872905	0.0626566	0.0573569	0.0812751	0.0845309	0.0796778	0.0627384	0.0812232	0.0553139	0.0887227	0.0697505
1178	A	0.11473	0.0675186	0.0602439	0.079134	0.0476704	0.043985	0.19142	0.151339	0.182208	0.114978	0.156593	0.101399	0.0618257	0.103275
1216	A	0.124092	0.129786	0.0717813	0.148034	0.0450372	0.0571273	0.0850764	0.0716723	0.110736	0.0575908	0.0940968	0.0737018	0.0929569	0.0527884
1232	A	0.0231321	0.046582	0.0549916	0.0778884	0.0699505	0.0407383	0.106377	0.0885201	0.095584	0.0799115	0.0882412	0.122781	0.0876013	0.0568707
1248	A	0.087112	0.0740427	0.0509175	0.0678922	0.0177423	0.00938615	0.0704199	0.0621561	0.0560751	0.0571985	0.0375643	0.0394029	0.0499571	0.0531592
1249	A	0.10086	0.122627	0.169029	0.104575	0.108674	0.109929	0.446486	0.561165	0.649175	0.410053	0.49037	0.563802	0.139149	0.467561
1251	A	0.0963502	0.0908649	0.0672235	0.104704	0.0376456	0.0349276	0.0883083	0.0541624	0.0642731	0.0762179	0.0598511	0.0387244	0.061029	0.0682697
1257	A	0.0390814	0.0464606	0.0407623	0.026165	0.0177156	0.020905	0.0513225	0.0682447	0.077674	0.0613017	0.035664	0.0589275	0.0186736	0.0856402
1264	A	0.113964	0.0986558	0.08211	0.103682	0.0420438	0.0484888	0.0621663	0.122722	0.113268	0.0825397	0.0794567	0.0934366	0.0705843	0.0984376
1268	A	0.122258	0.10607	0.0836087	0.110581	0.0221764	0.0233291	0.162792	0.192927	0.245596	0.168435	0.197973	0.192105	0.0726887	0.153115
1273	A	0.137155	0.119974	0.136363	0.118946	0.0655753	0.0834307	0.172376	0.165207	0.258164	0.124067	0.172635	0.189384	0.13434	0.177936
1288	A	0.0501769	0.069516	0.0704209	0.0700791	0.0404418	0.0288026	0.0606673	0.0472218	0.0586233	0.0469778	0.0354618	0.0539497	0.0644232	0.0446628
1297	A	0.122998	0.0865839	0.121899	0.135384	0.0839562	0.0637078	0.136194	0.126746	0.178926	0.162253	0.160829	0.133292	0.0988192	0.0728416
1301	A	0.121005	0.1049	0.112342	0.132471	0.0846683	0.135982	0.165269	0.217007	0.257332	0.146386	0.165386	0.209362	0.135872	0.193175
1306	A	0.136033	0.162526	0.158393	0.136757	0.199177	0.132489	0.112582	0.158331	0.210835	0.113802	0.117228	0.151524	0.183457	0.145863
1316	a	69.9328	70.408	71.8855	71.0546	71.3398	60.7663	46.8531	47.0827	47.7697	49.338	11.6815	7.75471	55.3037	37.25
1317	a	0.206922	0.283309	0.290928	0.272011	0.399013	0.197212	0.0955359	0.0626053	0.081857	0.103883	0.0501421	0.0827077	0.221077	0.0292005
1318	A	0.093894	0.0883652	0.144296	0.141048	0.139923	0.165464	0.117611	0.0868978	0.205351	0.05958	0.0837708	0.0956206	0.0792524	0.058651
1320	a	0.604264	0.658576	0.664596	0.663159	0.48391	0.357676	0.74206	0.783692	0.887871	0.809756	0.893099	0.686414	0.577054	0.577773
1324	A	0.0905057	0.125958	0.0953175	0.167272	0.134458	0.0734821	0.110483	0.16182	0.281553	0.118372	0.189548	0.143392	0.115902	0.103407
1327	A	0.183241	0.221384	0.185759	0.269317	0.235182	0.194158	0.435468	0.346021	0.453212	0.330047	0.365419	0.348414	0.301752	0.287875
1328	A	0.241594	0.186254	0.241525	0.28499	0.216743	0.14581	0.485546	0.453631	0.57273	0.357027	0.405132	0.433301	0.219104	0.500551
1331	A	0.161012	0.151564	0.216913	0.194212	0.137276	0.0965971	0.100244	0.107666	0.0718721	0.0816848	0.138117	0.0515685	0.103417	0.0653452
1336	A	0.0452985	0.0403633	0.0393807	0.0651537	0.0547028	0.0309651	0.0314936	0.0490256	0.0439136	0.0381898	0.0442681	0.0292038	0.0656276	0.0333877
1337	A	0.0502104	0.0854125	0.0568378	0.0489983	0.0355194	0.0449843	0.0433526	0.0695221	0.0539733	0.0504146	0.0375139	0.0104537	0.0528218	0.0334613
1339	A	0.016592	0.026766	0.0369932	0.0378972	0.0320873	0.0386494	0.0720897	0.0601789	0.056186	0.064661	0.0516934	0.0680174	0.0525041	0.0600414
1348	A	0.118291	0.109151	0.0996206	0.105001	0.0688137	0.0746269	0.0853065	0.107721	0.0973017	0.0721284	0.0674338	0.0762533	0.126324	0.108465
1362	A	0.070367	0.086929	0.0915868	0.111032	0.0769986	0.0949448	0.110229	0.102768	0.0717194	0.102496	0.100131	0.0718284	0.0778584	0.078489
1365	A	0.129255	0.110756	0.0764649	0.113776	0.0768011	0.0901246	0.043873	0.0352676	0.0393821	0.0679548	0.0334842	0.0205009	0.149242	0.0476061
1366	A	0.114974	0.114088	0.0902871	0.129597	0.0938318	0.0893515	0.0521574	0.0394691	0.0413232	0.0643348	0.0242876	0.0238374	0.090232	0.0338692
1367	A	0.115952	0.116501	0.0872618	0.178731	0.0975443	0.118328	0.0636601	0.0879846	0.0917753	0.0539193	0.0594938	0.0700502	0.172856	0.0808181
1381	A	0.0978726	0.108294	0.0992925	0.131566	0.0739286	0.0831657	0.0455142	0.0448444	0.0383784	0.0618223	0.0300404	0.0417545	0.0997769	0.0390281
1382	A	0.0820443	0.080892	0.0848536	0.0968758	0.0462486	0.0308297	0.0594349	0.0499383	0.0479654	0.0527025	0.0237156	0.023706	0.0606704	0.0447561
1385	A	0.113903	0.108927	0.104192	0.168274	0.0556323	0.0322257	0.0886708	0.0924833	0.0902929	0.084652	0.052218	0.0370837	0.0883152	0.047167
1386	A	0.140663	0.0886842	0.102477	0.152297	0.0515762	0.0189966	0.0807495	0.0731958	0.0854061	0.0883092	0.0606844	0.0503699	0.0857925	0.0456748
1391	A	0.0996765	0.102525	0.1067	0.0933126	0.0264222	0.0371499	0.0760994	0.0960712	0.0933576	0.0708814	0.0660496	0.0618563	0.07196	0.0668686
1392	A	0.10641	0.0870708	0.0782028	0.116032	0.0315305	0.0263465	0.0622751	0.0648981	0.0463491	0.0639379	0.0372129	0.0472342	0.0702093	0.0593715
1414	A	0.0362198	0.0429755	0.0365313	0.0508259	0.02328	0.0260099	0.0620645	0.0707206	0.0924289	0.0753915	0.0575574	0.0552979	0.0451671	0.044932
1421	A	0.113999	0.107083	0.119667	0.129134	0.0328234	0.0249655	0.0614529	0.0683166	0.0416335	0.0502204	0.0295975	0.0192357	0.111812	0.0453721
1427	A	0.111578	0.115124	0.125162	0.114794	0.064254	0.045363	0.114419	0.11612	0.0966184	0.137607	0.105028	0.104522	0.132938	0.109486
1437	A	0.0892763	0.0822679	0.0745898	0.0811151	0.031887	0.0456744	0.0245022	0.0394434	0.025149	0.0514989	0.0171329	0.0256746	0.0793454	0.0417705
1446	A	0.109951	0.0509935	0.0810801	0.0785013	0.0467737	0.0404809	0.0508262	0.0440696	0.0606802	0.0567859	0.0485416	0.0386195	0.0610732	0.0397365
1453	A	0.0448602	0.0503918	0.0440448	0.0725558	0.0357068	0.0283078	0.0846805	0.0692308	0.0661724	0.0781784	0.061402	0.0523363	0.0644593	0.05489
1456	A	0.0435867	0.062159	0.0512113	0.0632805	0.0454277	0.0333507	0.0665277	0.0779021	0.0703687	0.0915409	0.0442192	0.0265729	0.0608972	0.0640905
1485	A	0.154338	0.168481	0.137412	0.187556	0.138917	0.0938983	0.140814	0.150386	0.188028	0.17088	0.10756	0.112737	0.112466	0.123535
1491	A	0.189809	0.16349	0.140718	0.156188	0.111545	0.0629473	0.127253	0.123632	0.162761	0.0980887	0.104649	0.103493	0.116708	0.0914126
1494	A	0.0880917	0.0782361	0.0674673	0.086063	0.0547206	0.0578651	0.0728362	0.0928645	0.10275	0.0900012	0.059736	0.0833937	0.09214	0.114707
1497	A	0.139715	0.132785	0.119523	0.173021	0.105263	0.0709672	0.14421	0.181996	0.181905	0.158277	0.139011	0.151714	0.0991847	0.15953
1502	A	0.121582	0.114317	0.12269	0.159277	0.131538	0.120505	0.15528	0.128896	0.183167	0.136521	0.146237	0.156479	0.161343	0.143423
1509	A	0.0725004	0.0787942	0.0651515	0.0792085	0.0754173	0.0304351	0.110114	0.12703	0.158705	0.101081	0.121226	0.0607688	0.0744431	0.0668575
1512	A	0.109273	0.0956494	0.0974905	0.133831	0.0746626	0.058326	0.136534	0.173044	0.169368	0.12881	0.122978	0.135075	0.0955522	0.117493
1517	A	0.111378	0.121445	0.114927	0.135514	0.121743	0.143576	0.37646	0.392161	0.424372	0.348814	0.329231	0.451302	0.110366	0.360375
1518	a	0.188534	0.159367	0.123347	0.199736	0.151354	0.133644	0.363506	0.327186	0.284694	0.264506	0.304845	0.366623	0.162903	0.329474
1519	A	0.0994616	0.0755869	0.0824416	0.117582	0.0869222	0.0693711	0.0526104	0.0593359	0.0524104	0.0682877	0.0525518	0.0754443	0.103749	0.0671384
1521	A	0.0929163	0.096804	0.0807297	0.104483	0.0793493	0.0594158	0.103364	0.109456	0.120059	0.0927016	0.0531229	0.0518657	0.0983371	0.10929
1527	A	0.0676922	0.0525327	0.0537428	0.0841586	0.040641	0.0244984	0.23661	0.292752	0.241067	0.20999	0.204002	0.152443	0.0329713	0.112132
1528	a	1.24373	1.24646	1.22611	1.27347	1.27606	0.754542	0.557465	0.549789	0.513157	0.567058	0.47754	0.359605	0.853954	0.314937
1531	A	0.13806	0.165141	0.125608	0.140668	0.108291	0.0498707	0.0960681	0.0942106	0.12456	0.0774196	0.0825937	0.0419229	0.0716642	0.0628664
1541	A	0.170741	0.219162	0.150218	0.213673	0.119789	0.107429	0.179002	0.199223	0.256636	0.127326	0.182228	0.196965	0.168493	0.134913
1547	A	0.11551	0.141767	0.122405	0.141014	0.0659991	0.0449951	0.0964244	0.0966843	0.11123	0.10901	0.0959245	0.0630169	0.113178	0.0651328
1548	A	0.0907067	0.0909927	0.0805219	0.0886447	0.023053	0.0409451	0.0816881	0.0864972	0.0929693	0.0877293	0.0682442	0.0636193	0.0806044	0.0688463
1552	A	0.0695361	0.0578454	0.0726325	0.0549759	0.0366866	0.0339416	0.100817	0.119667	0.141972	0.121878	0.0811436	0.0614516	0.0793409	0.0871333
1554	A	0.037323	0.0544137	0.0340132	0.0368635	0.0210074	0.0195652	0.0864486	0.0953522	0.0864512	0.0843641	0.0585036	0.080068	0.029144	0.0839251
1557	A	0.0465271	0.0400733	0.0297497	0.0345129	0.0167682	0.0152417	0.0416657	0.0582999	0.051802	0.0347584	0.0487792	0.0326747	0.0237223	0.045676
1558	A	0.0510595	0.0461487	0.0504079	0.0713691	0.0302646	0.0162582	0.0642232	0.0605884	0.060269	0.0484472	0.0513446	0.0404462	0.0451453	0.0547529
1559	A	0.0660837	0.0729831	0.0497808	0.0665868	0.0114805	0.014676	0.0550194	0.0421715	0.0332425	0.0592193	0.00908772	0.0141598	0.0479922	0.0431021
1569	A	0.0764307	0.0651912	0.0451555	0.0621229	0.028054	0.0133659	0.0277439	0.0255343	0.0271673	0.021471	0.0166732	0.00271113	0.0333453	0.0186438
1577	A	0.0874233	0.0687614	0.0718246	0.0921791	0.0353079	0.031465	0.129964	0.112676	0.141195	0.0926952	0.0766096	0.0756992	0.0541593	0.100617
1587	A	0.0719342	0.0598743	0.0768816	0.0981469	0.0415393	0.0204257	0.0839506	0.107931	0.137508	0.0828324	0.0838685	0.0418954	0.0394535	0.0496771
1593	A	0.0656052	0.0740128	0.0795167	0.0943012	0.034724	0.0471027	0.0663357	0.0727825	0.0751593	0.066703	0.0700695	0.0937482	0.0843489	0.0575138
1594	A	0.0514538	0.0411154	0.0490155	0.041202	0.0206806	0.011487	0.122239	0.113752	0.152193	0.106562	0.106509	0.119768	0.0295212	0.12144
1595	A	0.0891252	0.0856302	0.0551188	0.0964142	0.0389906	0.0317055	0.0509989	0.0745239	0.0354976	0.056032	0.0239609	0.0255989	0.0620077	0.0714216
1607	A	0.0761502	0.0800555	0.049139	0.0995118	0.0257214	0.0210995	0.0525684	0.055325	0.0456085	0.0494985	0.0289981	0.028651	0.0420358	0.0294005
1615	A	0.09393	0.100894	0.0735643	0.105946	0.0503134	0.0426187	0.0762594	0.0929251	0.103157	0.0907773	0.0702503	0.0498927	0.0713994	0.0684702
1617	A	0.195683	0.202507	0.208093	0.204991	0.172457	0.0967949	0.31586	0.318659	0.310283	0.31524	0.302705	0.371429	0.128024	0.382657
1624	A	0.110011	0.109487	0.0871361	0.146917	0.0866473	0.0629765	0.0980161	0.10175	0.0985501	0.107719	0.0691057	0.0790993	0.0964506	0.0719964
1625	A	0.0809615	0.0732254	0.0694077	0.0915403	0.0659329	0.0628089	0.0788922	0.0851195	0.0509817	0.0667515	0.0424724	0.03535	0.0836465	0.0428508
1626	A	0.0711744	0.065964	0.0555126	0.100167	0.0353864	0.0265125	0.0436424	0.0462354	0.0681942	0.045867	0.0319204	0.0353893	0.0707659	0.0567441
1628	A	0.0770321	0.0737746	0.0360526	0.0498068	0.025526	0.0162768	0.0670496	0.0574156	0.0523823	0.0561259	0.0369375	0.0319045	0.045943	0.0533395
1631	A	0.0952598	0.0797668	0.0638396	0.0853071	0.0651707	0.029072	0.111788	0.0974163	0.12705	0.117689	0.0715281	0.0691255	0.0582906	0.0897555
1632	A	0.124464	0.0895209	0.0984781	0.0834725	0.0213665	0.0271937	0.119227	0.109931	0.121476	0.0899182	0.0676884	0.0538527	0.106576	0.0898967
1636	A	0.178976	0.203652	0.162758	0.196602	0.0198461	0.0216213	0.0749694	0.0654104	0.088932	0.0501692	0.0424764	0.0466046	0.131666	0.0649773
1637	A	0.0795521	0.0790973	0.0796065	0.0833944	0.0297119	0.0305397	0.0859202	0.0683583	0.0636183	0.0853386	0.0579979	0.0415122	0.0489264	0.0441844
1640	A	0.112181	0.124575	0.113542	0.146287	0.0414256	0.0429358	0.0314622	0.0274907	0.0478332	0.0387279	0.0259352	0.0159893	0.125187	0.0450889
1644	A	0.0849714	0.0971456	0.0583391	0.0989022	0.0213233	0.0212331	0.0388589	0.0345199	0.0337834	0.0454397	0.0171352	0.0281974	0.045726	0.0358453
1647	A	0.109037	0.102005	0.0717916	0.100789	0.0242808	0.0222456	0.058426	0.066617	0.0987312	0.0725975	0.0426578	0.018935	0.0395254	0.0286909
1662	A	0.0916286	0.113815	0.0889047	0.100264	0.0310351	0.0288867	0.103143	0.108155	0.129599	0.0930139	0.0933291	0.0862907	0.0846798	0.0573402
1663	A	0.0720479	0.0690848	0.051204	0.0755305	0.0243714	0.01523	0.085592	0.101894	0.120815	0.0721208	0.0828428	0.0355711	0.0571606	0.0481157
1673	A	0.0915289	0.0716401	0.0578004	0.074097	0.0334747	0.0191456	0.0345019	0.0455301	0.0406512	0.0359291	0.042249	0.02009	0.0485557	0.0437817
1676	A	0.0586292	0.0483436	0.0355476	0.0759233	0.0322084	0.0210328	0.0503467	0.0520644	0.052469	0.0654631	0.0453264	0.0261852	0.0477903	0.0467745
1678	A	0.0511467	0.0429558	0.0433631	0.0694026	0.0366185	0.0176942	0.0415698	0.0283117	0.0532277	0.046777	0.0296755	0.0208244	0.0353443	0.0452244
1693	A	0.192979	0.15936	0.142695	0.178331	0.144282	0.100729	0.121401	0.105221	0.122341	0.091047	0.0896361	0.110009	0.149612	0.0932717
1695	A	0.18544	0.163379	0.142363	0.186668	0.106399	0.0664057	0.070922	0.0822594	0.0945463	0.0638664	0.0549504	0.0585965	0.107931	0.0442411
1700	A	0.25327	0.24894	0.230857	0.304477	0.273529	0.250148	0.175532	0.237125	0.196065	0.161071	0.170189	0.156539	0.375999	0.104337
1704	A	0.319499	0.334107	0.319415	0.382996	0.456386	0.464186	0.26058	0.268771	0.274308	0.198096	0.206601	0.231298	0.794465	0.137374
1713	A	0.48779	0.440723	0.445451	0.554135	0.630492	0.489793	0.0951111	0.0751255	0.0666031	0.0606511	0.0540318	0.0589814	0.702827	0.0613865
1717	A	0.13884	0.119163	0.147619	0.234656	0.169602	0.149488	0.0538826	0.0532793	0.0468747	0.0445272	0.037026	0.0392842	0.344083	0.0357722
1723	A	0.115694	0.155106	0.117596	0.159172	0.150534	0.0702299	0.0888861	0.0745729	0.0842201	0.100728	0.0362228	0.0452668	0.169433	0.050583
1730	A	0.390033	0.284803	0.260481	0.439791	0.254265	0.178667	0.282726	0.331316	0.259005	0.29646	0.361202	0.185441	0.265041	0.158422
1731	A	0.0937595	0.108611	0.131544	0.15689	0.100084	0.0628557	0.064971	0.0578064	0.0721017	0.0605036	0.0563039	0.0238073	0.121877	0.0546142
1732	A	0.274896	0.300893	0.241687	0.373706	0.28944	0.219916	0.057711	0.0690434	0.051801	0.0590603	0.0518994	0.0287457	0.518086	0.0609638
1736	A	0.114581	0.0847864	0.0746996	0.147428	0.0568505	0.0833107	0.147702	0.210165	0.134097	0.170014	0.135994	0.107662	0.12984	0.127827
1737	A	0.055781	0.0627904	0.08449	0.0877566	0.0552017	0.0319868	0.210729	0.228182	0.226047	0.188147	0.215869	0.13302	0.0934159	0.193192
1740	A	0.0959894	0.0781886	0.105874	0.116553	0.0864221	0.0375756	0.0682633	0.0643985	0.0664404	0.074622	0.0168591	0.00931402	0.0727548	0.0508704
1743	A	0.13706	0.124846	0.130104	0.135943	0.0933791	0.239107	0.127208	0.107087	0.133556	0.109854	0.0697291	0.0753544	0.455724	0.0814437
1745	A	0.109311	0.0889546	0.101175	0.17028	0.053039	0.0553741	0.0580215	0.0910924	0.0593709	0.0704556	0.0452265	0.0345564	0.170614	0.0585991
1759	A	0.167956	0.15394	0.0994449	0.211956	0.0874107	0.0897811	0.168262	0.180414	0.201189	0.159535	0.129071	0.11171	0.170263	0.131098
1760	A	0.122098	0.0942434	0.073404	0.177534	0.0528234	0.0676265	0.138077	0.140316	0.153994	0.114998	0.11467	0.0782659	0.0964557	0.132584
1761	A	0.0793361	0.0862531	0.05063	0.0776953	0.0615435	0.0498548	0.110806	0.0874891	0.0889352	0.0962642	0.0781705	0.0525352	0.0867029	0.112278
1764	A	0.1008	0.10919	0.0955177	0.110739	0.014408	0.0249275	0.124555	0.0923788	0.129948	0.109178	0.071044	0.0776169	0.0728441	0.117435
1769	A	0.0535229	0.0552169	0.0354188	0.0640219	0.00936391	0.0167994	0.0572441	0.0676575	0.0668955	0.0717394	0.0413634	0.0268134	0.0442698	0.0648534
1770	A	0.0778947	0.0886035	0.0421479	0.0640802	0.0168757	0.0215675	0.0534873	0.0661821	0.0666807	0.0665989	0.0430928	0.019945	0.0554785	0.0361335
1774	A	0.0282106	0.0253385	0.0148191	0.0321943	0.0111495	0.0102938	0.0668701	0.0769766	0.0587291	0.0618885	0.0242065	0.0202316	0.0234331	0.0764526
1780	A	0.0312098	0.0380852	0.0269028	0.0446285	0.00685407	0.00715967	0.0427899	0.0423223	0.0414854	0.0432142	0.0296534	0.0206646	0.0299914	0.0330633
1781	A	0.0546022	0.0553771	0.0552792	0.0684875	0.0188416	0.0134227	0.0683483	0.0487366	0.0659238	0.0711669	0.0295942	0.0192218	0.0548611	0.0406097
1782	A	0.0811194	0.0705975	0.0500392	0.068496	0.0137024	0.0053699	0.057712	0.0661168	0.0372673	0.0607065	0.0345636	0.0151093	0.035846	0.0495276
1787	A	0.107542	0.103923	0.0834844	0.107028	0.0388984	0.0142235	0.194169	0.135457	0.148833	0.166718	0.0529757	0.0474129	0.0492482	0.0684392
1788	A	0.107606	0.111072	0.0819454	0.126967	0.0244307	0.0116036	0.0709896	0.0669077	0.0607782	0.0701665	0.0192106	0.0212346	0.0581645	0.0445018
1789	A	0.107826	0.137229	0.136853	0.123225	0.0408422	0.0542903	0.110746	0.110851	0.1246	0.0877431	0.0477613	0.0638397	0.127322	0.0964742
1795	A	0.0445592	0.0595138	0.0424088	0.0470897	0.0221834	0.0129943	0.0787558	0.107443	0.110286	0.102042	0.0683175	0.0414493	0.0406588	0.0751508
1796	A	0.0567911	0.0461382	0.0607991	0.0631229	0.0318893	0.0146835	0.080782	0.0851954	0.0901299	0.101322	0.0578211	0.0392478	0.0414656	0.0680823
1798	A	0.0887827	0.0844839	0.0863902	0.0860527	0.0154095	0.0206812	0.0500742	0.0417641	0.0377737	0.0504694	0.0231962	0.0230739	0.050997	0.0324886
1799	A	0.0699003	0.0516768	0.0530764	0.0565393	0.011535	0.0140931	0.0681242	0.0712056	0.0949453	0.0517356	0.0414632	0.0702884	0.0313235	0.0702816
1819	A	0.129181	0.143651	0.131311	0.181463	0.076898	0.0569399	0.0560297	0.046182	0.0666535	0.0526376	0.0276399	0.0322876	0.0384718	0.0453632
1831	A	0.111846	0.136852	0.120705	0.16118	0.0543938	0.035627	0.0649012	0.0918816	0.0680652	0.0989325	0.0411231	0.0397562	0.0886748	0.0542322
1832	A	0.107214	0.106353	0.0778476	0.120592	0.0564214	0.0242291	0.0593965	0.0627923	0.0331132	0.0779954	0.0226552	0.0254307	0.0774659	0.0671807
1837	A	0.105155	0.107537	0.0945595	0.0919036	0.0514177	0.0660635	0.153861	0.181789	0.184887	0.165295	0.135785	0.116186	0.0919994	0.145362
1844	A	0.117436	0.159053	0.137792	0.158359	0.084674	0.0805578	0.139885	0.137339	0.162461	0.137611	0.135784	0.111657	0.13904	0.159095
1852	A	0.0479841	0.0654273	0.0637581	0.0603074	0.0316124	0.0329319	0.0795279	0.101123	0.0929103	0.0852978	0.0741698	0.0637186	0.0667381	0.0525435
1861	A	0.152103	0.142321	0.123133	0.186674	0.0551565	0.0271217	0.125813	0.117835	0.144908	0.126806	0.103284	0.0707383	0.0883511	0.0512058
1862	A	0.390177	0.368464	0.466529	0.374532	0.458206	0.161227	0.325308	0.302958	0.306893	0.242496	0.299272	0.190158	0.246045	0.221262
1865	a	0.402876	0.46484	0.401332	0.450261	0.383328	0.831168	0.279706	0.241469	0.283188	0.231827	0.185419	0.224239	0.903221	0.205859
1867	A	0.118742	0.120222	0.138635	0.0770396	0.10656	0.0485385	0.146811	0.176534	0.186807	0.13759	0.158759	0.0774604	0.0842242	0.0661418
1868	A	0.171576	0.154462	0.17456	0.155912	0.132615	0.0516305	0.116819	0.107175	0.135453	0.107232	0.105061	0.042811	0.0775216	0.05833
1882	A	0.0625777	0.0574989	0.0628551	0.0636551	0.0183276	0.00998333	0.0507783	0.0839884	0.0397532	0.0595382	0.023943	0.0240804	0.0525546	0.0481394
1885	A	0.0724702	0.094697	0.0806106	0.1025	0.0270623	0.011977	0.0684457	0.0607981	0.0710404	0.0705541	0.0211853	0.0155286	0.0601219	0.0347641
1886	A	0.0871126	0.0888127	0.0761213	0.103179	0.0442793	0.0219084	0.0719802	0.0726573	0.0727412	0.0736826	0.0208651	0.0307304	0.0657646	0.0678689
1890	A	0.0697344	0.0913761	0.0770694	0.0755589	0.0539722	0.0583686	0.225303	0.213277	0.167659	0.164844	0.189535	0.185327	0.0920862	0.127696
1891	A	0.133271	0.12885	0.0922464	0.140103	0.0609193	0.0528071	0.187423	0.206793	0.153156	0.189753	0.154006	0.183075	0.0974345	0.156073
1901	A	0.0975743	0.0886857	0.0765604	0.108388	0.0279494	0.0167236	0.0580065	0.0654233	0.0870133	0.0658195	0.0518354	0.0356722	0.0698565	0.0488048
1902	A	0.0882902	0.07955	0.0798861	0.0865308	0.0567825	0.0376215	0.128198	0.134933	0.215946	0.124572	0.109889	0.115559	0.0603776	0.0973412
1911	A	0.112151	0.112698	0.126172	0.162995	0.0931419	0.0868188	0.0773053	0.0852194	0.0783251	0.075892	0.0576546	0.0570305	0.120623	0.0784647
1917	A	0.200956	0.180024	0.160584	0.206059	0.134222	0.0980333	0.144925	0.143073	0.142589	0.119404	0.145015	0.119726	0.147687	0.121065
1923	A	0.107453	0.101981	0.0821918	0.15974	0.0729271	0.0731225	0.08032	0.0676495	0.0639492	0.078533	0.0533929	0.0385474	0.133453	0.0647925
1926	A	0.131888	0.109731	0.107108	0.145002	0.0983298	0.102276	0.0735797	0.0832382	0.0751484	0.056533	0.0432753	0.0593082	0.172767	0.0637084
1928	A	0.123529	0.134965	0.106426	0.15356	0.0874085	0.0458424	0.0384795	0.0582891	0.0522249	0.0347658	0.0299219	0.0411998	0.132662	0.0265227
1933	A	0.234045	0.267751	0.320851	0.245251	0.260512	0.284911	0.178023	0.249399	0.210628	0.176938	0.201641	0.20533	0.309092	0.192919
1935	A	0.20605	0.171076	0.218759	0.214498	0.187032	0.213189	0.0424856	0.0421684	0.0467117	0.0382218	0.0542367	0.0736756	0.215536	0.0435253
1936	A	0.138761	0.159457	0.156498	0.197878	0.185129	0.137984	0.0764716	0.0654781	0.0736407	0.0773567	0.0597526	0.0432218	0.176723	0.0604268
1937	A	0.162837	0.145696	0.167301	0.191413	0.163324	0.146567	0.0901018	0.0650814	0.0621365	0.0758952	0.0420851	0.0258371	0.176847	0.0574964
1938	A	0.118611	0.13581	0.106407	0.13533	0.10358	0.0858938	0.0773539	0.0956095	0.0950372	0.0589332	0.0582059	0.052776	0.133925	0.0425636
1950	A	0.138444	0.107519	0.0648214	0.140788	0.0871511	0.0545811	0.0594796	0.0768906	0.0619651	0.0789464	0.0615914	0.0254763	0.0913541	0.0588521
1952	A	0.134935	0.13845	0.123528	0.157374	0.0869208	0.0662122	0.0818116	0.12006	0.104364	0.125469	0.0750405	0.0575846	0.0957625	0.101424
1954	A	0.187221	0.155385	0.128697	0.217085	0.0905365	0.05523	0.140528	0.12536	0.141445	0.138977	0.132178	0.0751771	0.128569	0.0757556
1956	A	0.0935403	0.0965942	0.112448	0.115077	0.0793632	0.045319	0.0886582	0.092982	0.110989	0.097832	0.106193	0.0558859	0.0735246	0.0819757
1958	A	0.248811	0.216153	0.18524	0.203965	0.134	0.164684	0.191459	0.208723	0.25201	0.17362	0.189474	0.21495	0.179603	0.177836
1961	A	0.159386	0.198786	0.149072	0.226126	0.109551	0.131257	0.125528	0.145074	0.147146	0.146959	0.137438	0.190776	0.214267	0.148199
1964	A	0.2069	0.13708	0.152887	0.170664	0.109759	0.0994598	0.146922	0.114881	0.107906	0.110063	0.073278	0.0992457	0.138023	0.105525
1973	A	0.149174	0.214318	0.114982	0.210947	0.120867	0.115112	0.114429	0.115807	0.0858919	0.119975	0.0969115	0.10799	0.194483	0.0971593
1977	A	0.149622	0.129077	0.18865	0.138451	0.0694568	0.0277513	0.0785888	0.0640805	0.101835	0.0956875	0.0647121	0.0569186	0.0730028	0.0497985
1978	A	0.139956	0.112936	0.109356	0.110572	0.0735499	0.0754897	0.123216	0.119765	0.128152	0.134153	0.123104	0.119983	0.109231	0.11274
1984	A	0.171395	0.178463	0.132658	0.15728	0.102587	0.0825153	0.265718	0.242716	0.207201	0.194395	0.200993	0.181198	0.0975563	0.152767
1985	A	0.124927	0.103808	0.0718122	0.110015	0.0447343	0.0329027	0.146237	0.123475	0.118264	0.1414	0.134847	0.0857004	0.0896112	0.107953
1992	A	0.104847	0.0794183	0.0770144	0.106562	0.0402932	0.0387447	0.100104	0.105158	0.0889933	0.0851541	0.0762203	0.0808807	0.0712815	0.0779398
1993	A	0.0789541	0.0573874	0.0315006	0.0536795	0.0265194	0.0373486	0.0354137	0.0512413	0.0458082	0.0631852	0.0305086	0.023918	0.0467423	0.058902
1996	A	0.0571839	0.0677023	0.0439248	0.0855032	0.0260868	0.0193723	0.0590864	0.0646569	0.0684224	0.0609313	0.044282	0.0347431	0.0537696	0.0567176
2003	A	0.0815436	0.0732558	0.0616249	0.078064	0.0375576	0.0284074	0.0611689	0.0420624	0.0486165	0.0628116	0.0455206	0.0128824	0.065936	0.0468447
2004	A	0.0363614	0.0325513	0.0345163	0.0489918	0.0332308	0.0254426	0.0653797	0.0807218	0.0689441	0.0917075	0.047471	0.0310999	0.0660445	0.0624382
2006	A	0.0388944	0.0469529	0.0526992	0.0667376	0.0315334	0.0314648	0.0561022	0.0463631	0.0550629	0.0575475	0.0364159	0.0267311	0.0516909	0.0345267
2007	A	0.0772019	0.0631727	0.0468067	0.0787743	0.0395023	0.0205547	0.0626331	0.0667803	0.0734151	0.0682721	0.036611	0.0279055	0.0784866	0.0389055
2011	A	0.0622069	0.0600207	0.0371524	0.0369396	0.0305874	0.043259	0.0642371	0.0683556	0.0537556	0.0545954	0.0595093	0.0526067	0.0644943	0.0460583
2019	A	0.189811	0.142593	0.135151	0.183826	0.0765951	0.0570044	0.0608233	0.0730094	0.0738993	0.0677041	0.0663834	0.0630163	0.109333	0.0411527
2020	A	0.0936797	0.048703	0.0785636	0.0726564	0.0315571	0.0519546	0.0675929	0.0679133	0.0585272	0.0499957	0.0343452	0.031977	0.0980322	0.048927
2023	A	0.1218	0.118929	0.0809009	0.119146	0.053441	0.0472967	0.030951	0.0288088	0.0244443	0.0272572	0.0165664	0.0142362	0.133274	0.0213174
2024	A	0.0927023	0.0799418	0.0707056	0.0909541	0.0551967	0.0329256	0.0507915	0.0539766	0.0543549	0.0470985	0.0436309	0.0251521	0.076843	0.0346977
2027	A	0.0589923	0.074638	0.0587255	0.0865369	0.0776518	0.0321299	0.0780655	0.0857245	0.103628	0.0865919	0.0673278	0.0554544	0.0803817	0.0560108
2034	A	0.0917555	0.0936716	0.0850842	0.111859	0.0534678	0.0475374	0.0453817	0.0471132	0.0602938	0.0387747	0.0626697	0.0528392	0.088872	0.0269744
2035	A	0.120901	0.130882	0.121723	0.10371	0.037445	0.0503936	0.0563804	0.0563857	0.0428112	0.0437216	0.0547234	0.0310919	0.0530614	0.0286536
2036	A	0.0895482	0.0839973	0.0573896	0.0828912	0.035208	0.0273024	0.0755983	0.0782811	0.0654097	0.0678974	0.0318234	0.0211929	0.0814934	0.036567
2037	A	0.0978694	0.0771255	0.0948381	0.101962	0.0669018	0.0459543	0.0816237	0.063088	0.0746421	0.104198	0.0473704	0.0351354	0.105194	0.069523
2041	A	0.112527	0.102609	0.0819952	0.112268	0.0481038	0.036903	0.206597	0.213805	0.227601	0.207013	0.154855	0.102545	0.0693775	0.122424
2051	A	0.213631	0.2023	0.151154	0.241725	0.190956	0.328735	0.117914	0.111309	0.0995595	0.12163	0.0761532	0.105579	0.148112	0.106032
2063	A	0.0813308	0.0694004	0.0692032	0.0858681	0.0594152	0.0740584	0.0448133	0.0648929	0.0550588	0.0454112	0.0380225	0.0399611	0.111647	0.0668818
2065	A	0.0577019	0.0796486	0.0725064	0.0883039	0.0455607	0.0379645	0.0481891	0.0397364	0.0489211	0.0492898	0.0228023	0.0185389	0.0726976	0.0331954
2082	A	0.0745912	0.0893139	0.0608625	0.113572	0.046905	0.0547953	0.0462825	0.0467438	0.0510805	0.0763085	0.0304711	0.0355397	0.0848728	0.041424
2087	A	0.0792906	0.107288	0.0744884	0.107831	0.0441359	0.023326	0.0794027	0.0890873	0.0813498	0.080856	0.0514121	0.0407701	0.0644266	0.0599344
2089	A	0.169147	0.0984088	0.130544	0.161654	0.102285	0.0791396	0.171366	0.179676	0.206767	0.166397	0.149302	0.138875	0.0980687	0.152769
2094	A	0.222571	0.18873	0.209788	0.203383	0.194669	0.0943558	0.35571	0.359036	0.457116	0.358251	0.389644	0.349521	0.16357	0.321748
2099	A	0.132935	0.147701	0.141172	0.115004	0.0796189	0.0652612	0.272541	0.256413	0.266153	0.20288	0.243054	0.228944	0.167488	0.251036
2144	A	0.263869	0.351705	0.387277	0.297793	0.407734	0.412285	0.612929	0.565374	0.680231	0.499731	0.648898	0.623942	0.301466	0.559474
2203	A	0.0400618	0.0432568	0.054159	0.0139606	0.00581362	0.021621	0.0833411	0.0461979	0.106135	0.0851528	0.0473447	0.0367636	0.0362694	0.0591266
2227	A	0.0456926	0.0854852	0.0564267	0.100873	0.054944	0.0315803	0.0734054	0.0820738	0.0629115	0.0585737	0.0875165	0.052759	0.0868056	0.0630403
2249	A	0.140647	0.164327	0.193677	0.232549	0.102751	0.0903509	0.067714	0.0811189	0.1233	0.0740234	0.102601	0.0909696	0.213501	0.0670083
2259	A	0.162812	0.242432	0.159936	0.25691	0.0983445	0.13695	0.056652	0.0765272	0.0627508	0.0512941	0.0477897	0.0387663	0.236318	0.048164
2264	A	0.123015	0.164152	0.143416	0.230836	0.112277	0.1001	0.121233	0.113937	0.11098	0.0917189	0.0865132	0.104486	0.156196	0.101691
2272	A	0.275808	0.303243	0.242674	0.34943	0.209375	0.127327	0.102058	0.0822012	0.139346	0.0818331	0.0954102	0.110405	0.288184	0.103177
2275	A	0.46086	0.578313	0.488733	0.590848	0.341246	0.191331	0.125591	0.148157	0.166211	0.107194	0.168113	0.216637	0.279793	0.155159
2278	A	0.487741	0.497268	0.536337	0.578205	0.448178	0.30413	0.500182	0.469608	0.633133	0.335641	0.547775	0.601501	0.528531	0.414375
2281	A	0.331933	0.507492	0.338164	0.360009	0.300422	0.255229	0.678409	0.839766	1.06226	0.468284	1.01143	1.10984	0.463928	0.568244
2296	A	0.151104	0.133779	0.0977995	0.177452	0.0840248	0.0768935	0.0464365	0.0705026	0.0699807	0.0633379	0.0470681	0.069518	0.107023	0.0610501
2303	A	0.130186	0.14964	0.134688	0.14602	0.0813312	0.0239574	0.083349	0.074756	0.117058	0.0574076	0.0319365	0.0267945	0.0570734	0.0556777
2304	A	0.0891749	0.102191	0.0887646	0.123165	0.0375832	0.0203794	0.061545	0.0695819	0.0605087	0.0503241	0.0439022	0.0331196	0.0575612	0.0622877
2309	A	0.153612	0.159581	0.165559	0.167431	0.0766871	0.0821663	0.203308	0.230437	0.307816	0.203221	0.255083	0.199742	0.0836132	0.139053
2328	A	0.153028	0.148158	0.0827446	0.20426	0.108322	0.0891402	0.159542	0.182966	0.160009	0.1251	0.124303	0.161685	0.117184	0.12487
2337	A	0.121837	0.11593	0.10206	0.106079	0.0742431	0.0818133	0.0760387	0.100686	0.108211	0.0879455	0.0886313	0.071976	0.083101	0.0395007
2343	A	0.204357	0.186163	0.142281	0.212078	0.151874	0.167317	0.116769	0.133422	0.138835	0.112241	0.0976167	0.0992793	0.263562	0.0680075
2345	A	0.242476	0.173956	0.142354	0.212574	0.149802	0.110633	0.16361	0.18262	0.156079	0.177481	0.1267	0.0390749	0.150641	0.0774353
2356	A	0.204342	0.173036	0.124087	0.237562	0.13085	0.0739025	0.217425	0.209516	0.275406	0.189956	0.223087	0.0915272	0.122001	0.10935
2359	a	0.0393444	0.0357626	0.0313102	0.05949	0.0344208	0.0385518	0.193588	0.155709	0.18283	0.141555	0.11268	0.0394166	0.0436318	0.105577
2362	A	0.120979	0.11434	0.114141	0.111619	0.128356	0.0946202	0.0911647	0.105233	0.134928	0.077923	0.113313	0.0525603	0.123928	0.0736046
2363	A	0.0781586	0.090964	0.0716969	0.0805366	0.0709178	0.0594189	0.0551414	0.067978	0.0666528	0.0613023	0.0445329	0.0240111	0.0670789	0.0382461
2364	A	0.103652	0.0734972	0.0749489	0.0949736	0.0839938	0.0636106	0.051881	0.0540073	0.0535941	0.043226	0.032079	0.0176259	0.0790252	0.0409864
2366	A	0.141661	0.106725	0.101605	0.101621	0.0571225	0.0438262	0.155497	0.153356	0.116325	0.156112	0.0471986	0.02513	0.102315	0.142518
2370	A	0.177788	0.184227	0.158924	0.207284	0.0996075	0.113033	0.0190198	0.0352697	0.0400979	0.0448328	0.0322884	0.00919963	0.171012	0.0194454
2371	A	0.182613	0.156394	0.147441	0.178652	0.113662	0.0664396	0.0741486	0.0821249	0.06777	0.0725163	0.0378389	0.0138837	0.101007	0.0365059
2372	A	0.119319	0.114511	0.075261	0.117935	0.0837331	0.0568445	0.053982	0.051934	0.0581826	0.0714922	0.0446229	0.0108013	0.0624482	0.0586212
2375	A	0.136944	0.140169	0.101663	0.134148	0.0529094	0.0246903	0.12254	0.103799	0.12124	0.094153	0.0961652	0.0851916	0.106791	0.0751889
2377	A	0.205594	0.172556	0.170404	0.192671	0.119956	0.141925	0.272847	0.239578	0.220383	0.196098	0.188638	0.272119	0.197493	0.197678
2378	A	0.109344	0.0854973	0.0939328	0.10502	0.0411898	0.0512409	0.0704381	0.0804892	0.0632301	0.0698069	0.042852	0.028023	0.0771206	0.0660611
2384	A	0.121227	0.127758	0.150054	0.152905	0.109141	0.0664531	0.0840301	0.0968377	0.075961	0.0795123	0.061934	0.0357065	0.126075	0.0503392
2385	A	0.149797	0.13801	0.152088	0.164381	0.139866	0.129072	0.075177	0.0995108	0.130169	0.121251	0.0651448	0.0654858	0.149404	0.0619195
2391	A	0.371	0.434136	0.383618	0.43139	0.311653	0.450348	0.283823	0.292032	0.225601	0.288219	0.281711	0.273623	0.389328	0.224912
2392	A	0.125861	0.152308	0.120144	0.206064	0.140969	0.145409	0.140669	0.176703	0.125354	0.208137	0.153067	0.156439	0.187076	0.146081
2397	a	0.247374	0.285717	0.32601	0.235899	0.232302	0.162902	0.415635	0.41242	0.340155	0.407199	0.335248	0.313703	0.333588	0.301968
2399	A	0.518404	0.578167	0.787018	0.56493	0.620175	0.520718	0.171315	0.178853	0.230543	0.203173	0.17172	0.134824	0.667998	0.115118
2400	A	0.649101	0.622434	0.790284	0.588976	0.70629	0.856964	0.140497	0.121555	0.137485	0.143623	0.12478	0.135563	0.882507	0.0908515
2408	A	0.109086	0.0819445	0.0957573	0.10119	0.0401747	0.0323785	0.0582577	0.0606053	0.0473043	0.0411922	0.0196821	0.0146266	0.102468	0.048697
2413	A	0.0390433	0.0355995	0.051955	0.03463	0.0258846	0.0241429	0.0501039	0.046659	0.0546707	0.0667277	0.0193689	0.00704374	0.0250291	0.0356405
2414	A	0.0816354	0.0406678	0.0542498	0.0763146	0.0463886	0.0225331	0.0174585	0.0251427	0.0236917	0.0173354	0.0247052	0.0195855	0.0289735	0.018698
2416	A	0.0416155	0.0391232	0.0397363	0.0317785	0.0383022	0.0460369	0.0630019	0.0737897	0.0685128	0.0835588	0.0833701	0.0756053	0.0490789	0.0622278
2419	A	0.0424046	0.0291316	0.0337019	0.0359562	0.0323696	0.0225552	0.126967	0.134551	0.123122	0.130556	0.114025	0.0761421	0.0570617	0.0822392
2424	A	0.0790732	0.0725333	0.0863984	0.0909315	0.0467151	0.0361894	0.0283489	0.0252904	0.0380618	0.0393695	0.0202955	0.0149739	0.0728571	0.0271274
2425	A	0.083383	0.0732124	0.0747913	0.125553	0.0495057	0.0444589	0.0532104	0.0626321	0.0736871	0.0563001	0.0502947	0.0423774	0.0650869	0.0504957
2427	A	0.113609	0.116697	0.0793395	0.123203	0.059976	0.0664984	0.102153	0.123412	0.159599	0.0928797	0.10455	0.0619844	0.121098	0.109642
2434	A	0.0772149	0.0848389	0.0538287	0.0844147	0.0613733	0.0568864	0.0588309	0.0740934	0.0986092	0.0492662	0.0463014	0.0711484	0.0890756	0.0881029
2445	A	0.0716171	0.0788581	0.0538981	0.0764704	0.0426709	0.0306578	0.0941025	0.11528	0.118315	0.129974	0.0474182	0.0529679	0.063938	0.0661152
2447	A	0.129829	0.14603	0.129455	0.164662	0.0672779	0.0775598	0.090287	0.0881994	0.0755972	0.0776628	0.0548173	0.0537765	0.122353	0.073328
2449	A	0.137758	0.127351	0.116011	0.162502	0.10048	0.0659472	0.12733	0.113152	0.119789	0.13738	0.118408	0.0747566	0.12159	0.138068
2456	A	0.135437	0.121417	0.108001	0.142587	0.0884651	0.081795	0.132277	0.11764	0.078137	0.120115	0.0628719	0.0628206	0.105928	0.0984686
2468	A	0.098879	0.0878835	0.0833428	0.103408	0.0351315	0.0370722	0.118862	0.144473	0.134824	0.120974	0.0739708	0.0802709	0.0636415	0.116628
2469	A	0.0838664	0.0957834	0.0655647	0.109552	0.0340483	0.0433788	0.0556875	0.0595613	0.0587939	0.0549837	0.0599966	0.0720112	0.0570253	0.0795575
2473	A	0.0552493	0.040683	0.050295	0.0584343	0.0320745	0.0412573	0.0437934	0.0667506	0.0536215	0.0689511	0.0206954	0.0229207	0.0376952	0.043235
2480	A	0.0745809	0.0493606	0.0561661	0.0516514	0.00871738	0.0108594	0.0545153	0.0600259	0.035727	0.0668332	0.0312944	0.0188314	0.050008	0.0456087
2503	A	0.0957648	0.0650531	0.0800334	0.0998378	0.0468043	0.0358618	0.0736962	0.052325	0.0538965	0.0768059	0.0452647	0.0270538	0.0606373	0.055325
2507	A	0.117652	0.110847	0.0970701	0.114054	0.0504353	0.0227732	0.106748	0.0798239	0.0824519	0.0880566	0.0541118	0.0476985	0.0811422	0.0570996
2508	A	0.116728	0.110914	0.091189	0.117983	0.0557917	0.0254535	0.119708	0.114714	0.117849	0.108713	0.0780153	0.0698241	0.0738519	0.0877974
2509	A	0.775707	0.768086	0.716956	0.715011	0.800277	0.668829	0.149209	0.120087	0.118661	0.117202	0.12349	0.134534	0.679544	0.133861
2513	A	0.0995972	0.103226	0.103532	0.124778	0.0571618	0.0577174	0.231054	0.218662	0.232476	0.201543	0.19203	0.207102	0.0852965	0.181032
2523	A	0.113454	0.0942207	0.0968813	0.121199	0.0328299	0.0269392	0.0848104	0.0742153	0.0707743	0.0559736	0.0460024	0.0457912	0.0781842	0.0483996
2525	A	0.082939	0.0734999	0.0849316	0.10762	0.0276493	0.0218079	0.0652519	0.0553718	0.0410683	0.0627097	0.00931394	0.0420336	0.0715393	0.0523021
2532	A	0.0678028	0.0797223	0.0743749	0.0760726	0.0262252	0.0223768	0.0634684	0.060103	0.049332	0.0681473	0.0342515	0.0191898	0.0478142	0.0519579
2533	A	0.0482657	0.0527277	0.0670002	0.0490155	0.0261913	0.00685377	0.075422	0.0554734	0.0715526	0.0631459	0.0232733	0.0247482	0.0554487	0.0469175
2539	A	0.0780434	0.0725276	0.0696596	0.120861	0.0416082	0.038629	0.100072	0.12388	0.119936	0.111621	0.0870369	0.0729812	0.0893665	0.085041
2547	A	0.127569	0.0958125	0.0959479	0.0991509	0.0820494	0.0628311	0.149571	0.160615	0.17897	0.139593	0.10963	0.109139	0.108023	0.115296
2549	A	0.076	0.0840864	0.0703798	0.0925781	0.0342823	0.0472218	0.0598733	0.0770353	0.0626587	0.0703692	0.0338191	0.0263178	0.128381	0.0754351
2561	A	0.0439049	0.0490002	0.0343091	0.0394662	0.0165526	0.0155428	0.0539804	0.046171	0.0515783	0.0394801	0.0210241	0.0213303	0.0485855	0.0355333
2569	A	0.0294003	0.0247546	0.0211648	0.0220386	0.00545013	0.0140728	0.0306871	0.0244676	0.0357342	0.0281346	0.0118353	0.0155283	0.02526	0.0221437
2577	A	0.0889821	0.08843	0.069447	0.0974448	0.041628	0.0103648	0.0657462	0.0798525	0.0757469	0.0730444	0.0616391	0.0287349	0.0537732	0.0349277
2578	A	0.0655075	0.0563627	0.0557144	0.0528598	0.0373039	0.0207137	0.0751181	0.0741473	0.071355	0.0729665	0.0343797	0.0251575	0.0479339	0.0412493
2583	A	0.0839828	0.0912855	0.0954522	0.0960971	0.0512915	0.0225177	0.0957739	0.0837379	0.0964362	0.0781394	0.05847	0.0532374	0.0676248	0.0603417
2587	A	0.114417	0.121674	0.0928936	0.0941213	0.0364406	0.0119457	0.0336587	0.0471846	0.0489716	0.0597914	0.0356707	0.032626	0.0934205	0.0482313
2594	A	0.0739092	0.0637894	0.0843446	0.0769991	0.060821	0.0359662	0.0924479	0.112187	0.102149	0.114963	0.0734126	0.0616627	0.0915215	0.0682718
2596	A	0.137018	0.114047	0.102277	0.108406	0.0570728	0.0284839	0.0617284	0.0649143	0.0709392	0.0561418	0.0459034	0.0436186	0.0830405	0.0549179
2597	A	0.154194	0.1618	0.174588	0.171795	0.156199	0.112539	0.115358	0.114567	0.113483	0.125778	0.0916148	0.085823	0.150153	0.0854626
2607	A	0.152868	0.156959	0.144126	0.202113	0.123811	0.170137	0.246363	0.266688	0.331078	0.230071	0.252305	0.271585	0.240774	0.21119
2617	A	0.150311	0.12365	0.125506	0.165062	0.108065	0.120003	0.141064	0.140835	0.192052	0.0924642	0.115582	0.0929623	0.227835	0.0871586
2619	A	0.123952	0.161787	0.110053	0.152672	0.121796	0.0877876	0.0964249	0.115875	0.0948875	0.0838349	0.0592573	0.0669792	0.134037	0.0592452
2637	A	0.257878	0.22355	0.245665	0.264739	0.155212	0.0964277	0.352817	0.332194	0.34171	0.319518	0.28669	0.145156	0.177953	0.21645
2638	A	0.202294	0.190315	0.20761	0.236941	0.167237	0.121552	0.242343	0.272626	0.213428	0.199749	0.219756	0.204732	0.200185	0.131133
2643	A	0.14784	0.175712	0.134014	0.140841	0.133364	0.113511	0.213265	0.214419	0.242325	0.191124	0.160057	0.150642	0.231454	0.206026
2655	A	0.0765911	0.0689998	0.0575381	0.0880348	0.045301	0.0240321	0.0608968	0.0704173	0.0486911	0.050741	0.0258875	0.0309709	0.0499796	0.0235014
2656	A	0.0714502	0.0642254	0.0548259	0.0967527	0.0386827	0.0200836	0.105416	0.0973637	0.0653603	0.108431	0.0362425	0.0464229	0.064317	0.0822727
2670	A	0.0942258	0.0820604	0.085816	0.115295	0.0507663	0.0392967	0.0605515	0.0790785	0.0808234	0.103152	0.0656236	0.0384662	0.0722705	0.0568172
2672	A	0.145369	0.167988	0.14614	0.156148	0.103312	0.084387	0.148787	0.161911	0.184289	0.157012	0.137447	0.115284	0.142708	0.177019
2674	A	0.174682	0.185874	0.157057	0.222748	0.15006	0.101202	0.291836	0.344105	0.413992	0.282486	0.362707	0.330684	0.147795	0.247734
2691	A	0.0947568	0.0867543	0.0864115	0.102133	0.0472647	0.0382887	0.0704644	0.0730758	0.0565502	0.0682627	0.0684797	0.0480604	0.0568433	0.076419
2692	A	0.0743268	0.0603886	0.0660956	0.0587819	0.0244439	0.0255549	0.0803113	0.0775336	0.0796322	0.0440306	0.0621128	0.0446897	0.0515119	0.0293126
2693	A	0.098164	0.0796914	0.0772927	0.109434	0.0391818	0.047105	0.0880827	0.060246	0.0912015	0.0796657	0.0649963	0.0529019	0.0656085	0.0854811
2721	A	0.0750707	0.0806461	0.080014	0.0949613	0.0413736	0.0494215	0.0814754	0.0686834	0.0892166	0.0767853	0.0403782	0.0368688	0.0709494	0.0755945
2739	A	0.0825629	0.0760649	0.0760146	0.0733183	0.0448814	0.044903	0.0534927	0.0413593	0.0473567	0.0522279	0.0468951	0.0558082	0.0636978	0.0522963
2740	A	0.133937	0.1331	0.117185	0.138508	0.0664388	0.0362128	0.0419293	0.0683179	0.0363974	0.0524541	0.0319062	0.027966	0.07886	0.0477198
2741	A	0.100333	0.0990235	0.0774799	0.0993816	0.0461086	0.0208938	0.0602149	0.0454205	0.0376525	0.056893	0.0273619	0.0148256	0.0505593	0.0287242
2742	A	0.110725	0.106057	0.118578	0.094619	0.0461562	0.0330611	0.0430197	0.0665186	0.0475898	0.0656824	0.0273025	0.0164196	0.119518	0.0462137
2751	A	0.566415	0.75992	0.845476	1.23691	0.495163	0.474332	0.42268	0.678502	0.795926	1.04143	0.449311	0.450674	0.519957	0.433113
2753	A	0.152834	0.186867	0.165962	0.201713	0.157129	0.12426	0.13196	0.146185	0.159323	0.144161	0.154857	0.115733	0.138926	0.0971002
2760	A	0.100203	0.111169	0.0790817	0.117055	0.0654585	0.0347842	0.115675	0.0885149	0.0897966	0.112964	0.0728979	0.0668421	0.0875978	0.074537
2761	A	0.067498	0.0773783	0.0731368	0.0893703	0.0395541	0.033102	0.0595361	0.0795934	0.0525849	0.0720086	0.0302238	0.0224738	0.0558467	0.0652131
2762	A	0.121333	0.0855793	0.089916	0.122254	0.0334648	0.0273333	0.0629168	0.0545355	0.0433075	0.0745514	0.0262733	0.018229	0.0810977	0.0282897
2779	A	0.130901	0.305226	0.466246	0.704209	0.111208	0.0695206	0.067248	0.254496	0.385247	0.60544	0.0729927	0.0399651	0.11687	0.0280656
2783	a	0.207231	0.227266	0.179852	0.231599	0.198789	0.622991	0.146983	0.162705	0.120153	0.195683	0.123843	0.149227	0.622218	0.173759
2785	A	0.0942956	0.0782992	0.0592106	0.0888869	0.0800089	0.0427671	0.0612295	0.0376441	0.0541292	0.0590786	0.0609692	0.0383799	0.0631229	0.0389291
2791	A	0.218169	0.204208	0.204904	0.186006	0.129513	0.17069	0.257945	0.281532	0.224358	0.198923	0.231541	0.178271	0.204429	0.1778
2794	A	0.174391	0.211949	0.12482	0.180106	0.111672	0.0932314	0.100806	0.0897932	0.105225	0.0725369	0.0615034	0.0689611	0.172058	0.0813628
2802	A	0.126239	0.101006	0.10279	0.103867	0.0481701	0.0535828	0.0802242	0.114666	0.100711	0.0606299	0.0984928	0.102489	0.0938276	0.0818868
2803	A	0.0900857	0.0772769	0.0604426	0.100362	0.0540205	0.0382334	0.0787802	0.0714257	0.0617334	0.0868692	0.0808473	0.0777373	0.0652779	0.0478747
2808	A	0.111413	0.120476	0.0927743	0.163903	0.0483916	0.0358322	0.0528136	0.078111	0.113953	0.0555851	0.053085	0.0559622	0.073149	0.0623718
2809	A	0.0847977	0.0771285	0.0744539	0.0951848	0.0402454	0.0349482	0.0772749	0.0714377	0.0798476	0.0677032	0.0414301	0.0598667	0.0590436	0.0746293
2811	a	2.95214	2.90338	2.82727	3.01451	2.85802	3.02536	0.229289	0.189313	0.169312	0.239639	0.121742	0.0938416	2.89537	0.165837
2821	A	0.0712989	0.0616051	0.0878395	0.0794882	0.0683042	0.0524171	0.0759328	0.0876716	0.0675838	0.0537896	0.0546877	0.0431147	0.047843	0.0661082
2828	A	0.091678	0.114727	0.122137	0.150655	0.0731125	0.0470901	0.0634945	0.0876692	0.10391	0.121311	0.0408849	0.0428614	0.0557867	0.0415072
2829	A	0.0930879	0.0967464	0.0702087	0.143995	0.0694962	0.0409327	0.0794037	0.131378	0.0938356	0.119491	0.0779709	0.0713464	0.055656	0.0972891
2831	A	0.0817466	0.065781	0.0461508	0.0878109	0.0703831	0.0595835	0.0532104	0.0690201	0.0574304	0.0724785	0.0442964	0.0411374	0.0509856	0.0555231
2832	A	0.0807388	0.0819036	0.0839076	0.0982335	0.0653441	0.0173275	0.0877337	0.0924869	0.0647089	0.0698151	0.0658263	0.0827253	0.0563069	0.0542769
2836	A	0.108916	0.103192	0.106452	0.130928	0.0601557	0.0438742	0.080332	0.0685133	0.0914852	0.0965141	0.0712645	0.0433714	0.0803874	0.052666
2840	A	0.17378	0.216587	0.214493	0.211888	0.125771	0.0649705	0.187766	0.175552	0.209421	0.188565	0.1673	0.17385	0.1118	0.126528
2841	A	0.176621	0.203359	0.173362	0.188472	0.163708	0.112331	0.134731	0.123296	0.167843	0.138138	0.114461	0.115861	0.151332	0.100992
2845	A	0.119229	0.0942579	0.107016	0.116924	0.0587861	0.0474397	0.130019	0.106057	0.124751	0.106835	0.0955932	0.129192	0.0805275	0.110542
2846	A	0.0923723	0.0912074	0.0563398	0.100257	0.0308587	0.0370175	0.0844779	0.0758949	0.104708	0.0733401	0.0554341	0.0797541	0.0842878	0.102174
2853	A	0.10094	0.0851738	0.0977194	0.104723	0.0634096	0.0714109	0.215745	0.246742	0.245301	0.193693	0.203451	0.254197	0.111905	0.222997
2854	A	0.0909967	0.0813431	0.0615479	0.0915533	0.0433046	0.0697739	0.127294	0.148	0.129067	0.110888	0.0783036	0.142794	0.0934782	0.118592
2860	A	0.0931341	0.0762397	0.0650204	0.112356	0.0458565	0.0526839	0.127056	0.157909	0.173756	0.131857	0.129005	0.150457	0.0769396	0.163773
2866	A	0.133964	0.114452	0.0982632	0.171089	0.0627216	0.0648687	0.11273	0.11675	0.173398	0.126917	0.0995223	0.114124	0.101176	0.123392
2867	A	0.0754022	0.0762062	0.0779387	0.0940484	0.0320146	0.0136338	0.0776964	0.0513334	0.0807955	0.0898807	0.0542641	0.0604108	0.0443562	0.0676376
2875	A	0.0794555	0.0943026	0.0722682	0.0956609	0.0488973	0.0200366	0.0647978	0.0752329	0.0698879	0.0751713	0.0335167	0.0593369	0.06375	0.0670269
2877	A	0.0870605	0.0627552	0.0537207	0.0917431	0.0658436	0.0453646	0.0776761	0.0827725	0.0774987	0.0830235	0.0490299	0.0520036	0.0696849	0.0433397
2878	A	0.0927561	0.0666693	0.0429479	0.0898641	0.0544707	0.0443883	0.0488159	0.0571259	0.0396439	0.0567061	0.0416412	0.0413712	0.0511996	0.0304772
2881	A	0.107529	0.103797	0.0887596	0.112839	0.0407963	0.0220307	0.0926815	0.103144	0.116023	0.120673	0.0424245	0.0360871	0.0790379	0.13927
2890	A	0.145834	0.145696	0.109677	0.166798	0.0879108	0.0592774	0.149104	0.141581	0.124582	0.107216	0.126345	0.124824	0.0762347	0.135517
2891	A	0.106224	0.10016	0.0915919	0.146257	0.0698437	0.0480068	0.0855558	0.11795	0.0965756	0.0781077	0.0872544	0.0688514	0.0798768	0.0656039
2919	A	0.136355	0.158221	0.112289	0.149294	0.0688428	0.0754601	0.145604	0.133862	0.154578	0.141553	0.0824027	0.0933567	0.15509	0.138862
2920	A	0.0872523	0.094181	0.0993125	0.122753	0.075861	0.0911014	0.138574	0.114144	0.151708	0.130825	0.0877809	0.156684	0.130232	0.125759
2948	A	0.0613379	0.0709519	0.0405362	0.0587928	0.0555009	0.0305043	0.0839908	0.126751	0.133747	0.0818899	0.0784669	0.149379	0.0390701	0.118524
2951	A	0.084781	0.118747	0.109516	0.0948521	0.057608	0.0468988	0.0942939	0.117832	0.130281	0.0640741	0.0660939	0.1175	0.0580904	0.0650707
2970	A	0.0422408	0.0259702	0.0324408	0.0400109	0.00639768	0.010127	0.0289771	0.0623237	0.0272637	0.0537584	0.0416506	0.0553141	0.0417414	0.0684976
2981	A	0.0532249	0.0495215	0.0428659	0.0515923	0.0090749	0.0272423	0.026851	0.0472534	0.0771183	0.0292391	0.0521312	0.0548366	0.0397538	0.0551125
3008	A	0.111976	0.095862	0.11966	0.157698	0.0975242	0.0733025	0.0929518	0.109446	0.181319	0.1155	0.191164	0.14422	0.157346	0.14591
3037	A	0.30223	0.294473	0.296063	0.337965	0.319431	0.33282	0.262347	0.325583	0.461732	0.236308	0.337883	0.311763	0.340978	0.205378
3096	A	0.336247	0.287026	0.0735835	0.28777	0.258176	0.0576037	0.169823	0.238998	0.134821	0.120259	0.115978	0.198288	0.178055	0.146074
3124	A	0.0779423	0.321305	0.196618	0.363141	0.157563	0.237389	0.200669	0.270093	0.172211	0.21235	0.203766	0.164984	0.364299	0.310482
3126	A	0.345224	0.339229	0.155039	0.3615	0.466805	0.406858	0.296912	0.349156	0.296308	0.334706	0.372147	0.394322	0.455355	0.265688
3127	A	0.380952	0.192911	0.193274	0.766456	0.0516529	0.144217	0.346928	0.348259	0.395726	0.274231	0.370645	0.331416	0.197103	0.314465
3141	A	0.320829	0.116601	0.22756	0.418141	0.258876	0.180072	0.29172	0.394958	0.368611	0.301988	0.238643	0.331126	0.119229	0.271297
3184	A	0.0922819	0.143215	0.0440383	0.160772	0.18315	0.0821447	0.1252	0.0820222	0.109308	0.108005	0.0692254	0.0925155	0.111973	0.0759054
3197	A	0.150635	0.121764	0.186366	0.263785	0.0895736	0.108405	0.130152	0.154539	0.217865	0.0632584	0.161302	0.214707	0.0692092	0.161976
3211	A	0.0440834	0.06148	0.0410813	0.181739	0.0965825	0.0649245	0.139116	0.123169	0.114195	0.0506044	0.08201	0.260853	0.0660088	0.0915192
3236	A	0.0732792	0.0787986	0.0809007	0.0491944	0.00652486	0.0406112	0.0287701	0.0614534	0.0684346	0.0607335	0.0595077	0.042268	0.0855104	0.0431997
3243	A	0.0659703	0.0341897	0.042523	0.0770021	0.0491746	0.0165938	0.0943771	0.0735681	0.0795048	0.105561	0.0981354	0.073095	0.0442702	0.0798085
3248	A	0.087652	0.0744934	0.0851789	0.050681	0.0429154	0.0453335	0.229709	0.21355	0.332009	0.106605	0.247747	0.279492	0.132062	0.270867
3267	A	0.151855	0.0974912	0.0871916	0.0917291	0.0612584	0.0132249	0.073408	0.0491189	0.0352574	0.105632	0.0695618	0.0386164	0.0902799	0.0306162
3275	A	0.0851012	0.0655035	0.0618334	0.0753321	0.0565931	0.0626207	0.118869	0.161521	0.0850468	0.0769231	0.113674	0.0855478	0.0893	0.0597997
3307	A	0.104373	0.0961879	0.0790722	0.109542	0.042517	0.105071	0.179458	0.148324	0.126396	0.0999106	0.0887933	0.14471	0.0694025	0.17943
3338	A	0.654195	0.556209	0.473583	0.574933	0.352328	0.500706	0.113244	0.109571	0.106334	0.0913389	0.115479	0.0911284	0.72902	0.0839246
3343	A	0.427155	0.384457	0.409989	0.290745	0.414283	0.571157	0.0913086	0.169658	0.138857	0.136262	0.202877	0.0964217	0.62469	0.0918063
3378	A	0.324324	0.134372	0.239808	0.339192	0.178094	0.257621	0.248636	0.276666	0.2867	0.23106	0.247432	0.255754	0.181277	0.301262
3437	A	0.119546	0.0847188	0.0744325	0.0303352	0.0796813	0.117932	0.0709364	0.10404	0.122324	0.079384	0.112296	0.18615	0.139216	0.112095
3501	A	0.166751	0.16885	0.101609	0.282461	0.194311	0.199225	0.127415	0.0964701	0.158433	0.098121	0.119167	0.135877	0.222282	0.221447
3510	A	0.169837	0.157862	0.16494	0.333944	0.146663	0.180925	0.259845	0.280374	0.406229	0.222258	0.399742	0.419259	0.184833	0.269032
3591	A	0.149261	0.0942768	0.0988142	0.207193	0.0812888	0.0566981	0.0608828	0.0616116	0.0577488	0.0587178	0.044613	0.0458768	0.107944	0.0609899
3594	A	0.223416	0.188431	0.160807	0.286391	0.164848	0.0827586	0.141269	0.139198	0.162338	0.0918063	0.0760145	0.0971522	0.14098	0.187691
3599	A	0.189753	0.225821	0.135453	0.201058	0.194291	0.102808	0.043448	0.081367	0.076365	0.0724454	0.0564621	0.0818761	0.119907	0.023586
3603	A	0.113291	0.0824856	0.144269	0.201677	0.0814694	0.0747544	0.0473383	0.0726876	0.0452489	0.050445	0.0395235	0.0458663	0.0962293	0.0364266
3605	A	0.140774	0.161926	0.184843	0.186548	0.1309	0.0681699	0.0210588	0.0267809	0.044479	0.0424028	0.0277177	0.0679425	0.106689	0.0357382
3606	A	0.175061	0.0912703	0.141493	0.185424	0.137363	0.114985	0.0881353	0.084497	0.0775752	0.0915493	0.0607936	0.0338734	0.0988704	0.0401213
3616	A	0.186839	0.313843	0.406321	0.26198	0.34342	0.218994	0.0950457	0.0716453	0.0942606	0.0891969	0.122074	0.0756634	0.309445	0.0726806
3619	A	0.43893	0.47646	0.466592	0.512534	0.453811	0.279757	0.167479	0.233852	0.397555	0.200254	0.275651	0.262454	0.363152	0.248848
3624	A	0.175071	0.18723	0.183726	0.226532	0.180375	0.135621	0.0931714	0.111348	0.102818	0.051271	0.0396401	0.113645	0.18016	0.0820655
3625	A	0.153771	0.184259	0.243553	0.177557	0.223045	0.112266	0.104822	0.107735	0.0643939	0.0943651	0.0316068	0.0429469	0.209751	0.081797
3630	A	0.049777	0.074951	0.0531106	0.0636002	0.0574132	0.0493075	0.132296	0.212678	0.229463	0.1998	0.176823	0.0868086	0.0898923	0.123804
3637	A	0.111911	0.112926	0.0969843	0.106925	0.0528613	0.0330393	0.157555	0.148448	0.13539	0.177863	0.0265675	0.0195829	0.0690939	0.0474746
3638	A	0.0885222	0.0895152	0.0745289	0.118432	0.0231531	0.0145227	0.118686	0.0853333	0.056101	0.133189	0.0328138	0.00641334	0.0596153	0.0983819
3641	A	0.101157	0.110045	0.102169	0.123914	0.047442	0.0361039	0.0782473	0.0611839	0.0808504	0.11904	0.0594177	0.0247036	0.059306	0.0503081
3642	A	0.0975869	0.0715201	0.0768413	0.089141	0.021252	0.0155907	0.0351782	0.0377824	0.0356337	0.0343171	0.0308328	0.00601612	0.072309	0.0196276
3643	A	0.0648862	0.0685696	0.0488568	0.0840526	0.0120943	0.0124459	0.0444372	0.0477135	0.0384991	0.0406495	0.0214968	0.00298427	0.0400018	0.0292326
3644	A	0.0382741	0.0415951	0.05035	0.0629124	0.016581	0.0202158	0.0653092	0.0601067	0.0680695	0.0641067	0.0275794	0.00893229	0.0411171	0.0583431
3646	A	0.0509321	0.029124	0.0527409	0.0671366	0.0296266	0.0528994	0.0694203	0.0546082	0.0587751	0.059577	0.117978	0.0676252	0.088452	0.07227
3647	A	0.100507	0.086095	0.0655706	0.0799603	0.0148161	0.0264624	0.0836548	0.057358	0.0738007	0.0555603	0.0454738	0.0235564	0.0571326	0.0482765
3648	A	0.0581615	0.0859141	0.0749745	0.10222	0.0147619	0.00932894	0.0557051	0.0523143	0.0471865	0.0661955	0.033291	0.0176232	0.0593359	0.0481974
3651	A	0.0968907	0.156904	0.137486	0.126755	0.0370074	0.0393899	0.0649866	0.0930545	0.0670466	0.0806036	0.0348035	0.036523	0.0885556	0.0647959
3657	A	0.150947	0.16895	0.129402	0.145581	0.0675414	0.0368938	0.187405	0.15094	0.194008	0.121617	0.143492	0.237454	0.136681	0.282615
3658	A	0.114994	0.114367	0.0717237	0.105635	0.0675423	0.0766498	0.178727	0.146185	0.205054	0.0783909	0.149103	0.242271	0.090752	0.267223
3677	A	0.167957	0.126666	0.0985194	0.182221	0.150517	0.110677	0.104131	0.109795	0.143953	0.108713	0.0728484	0.0421805	0.13607	0.108884
3682	A	0.133963	0.142493	0.127895	0.1608	0.132156	0.130225	0.118209	0.125153	0.0943956	0.105505	0.0860631	0.0477639	0.19463	0.10515
3687	A	0.107363	0.100292	0.089966	0.0974485	0.0476429	0.0215501	0.129431	0.11162	0.0641694	0.121504	0.0265943	0.0195556	0.0933921	0.109262
3697	A	0.166953	0.181001	0.236319	0.229969	0.211787	0.223904	0.0769213	0.0453938	0.0647595	0.0613658	0.0628913	0.0688796	0.410618	0.0831346
3706	A	0.176076	0.138136	0.116123	0.142663	0.0463522	0.0507561	0.0923361	0.0738324	0.084133	0.130348	0.0352896	0.0206249	0.0826289	0.0727366
3707	A	0.150036	0.146159	0.0894879	0.173485	0.0327563	0.0327435	0.0764543	0.0686976	0.0653731	0.0575705	0.0431826	0.00771823	0.0780994	0.0597792
3712	A	0.0397496	0.0581226	0.0450233	0.0493873	0.0239356	0.0257805	0.252204	0.290061	0.281578	0.277305	0.23982	0.193638	0.043461	0.253562
3713	a	1.00122	1.04127	1.07695	0.990793	0.982914	0.551332	0.745568	0.699513	0.61429	0.770709	0.598316	0.415227	0.624617	0.581452
3714	A	0.0550793	0.0413109	0.0397134	0.0658106	0.0193073	0.00681524	0.0929481	0.078854	0.0713741	0.0793126	0.0571741	0.0242884	0.0312778	0.0617075
3718	A	0.0317603	0.0219945	0.0325037	0.0715666	0.0377945	0.0279055	0.131671	0.19046	0.0932256	0.0975081	0.083696	0.0551638	0.0329607	0.108208
3719	a	1.67524	1.83373	1.76246	1.71757	1.79582	1.26709	0.42621	0.407366	0.273289	0.449458	0.287459	0.16675	1.19991	0.326516
3721	A	0.113579	0.106131	0.097362	0.118505	0.0558262	0.0280363	0.0445512	0.0526782	0.0361812	0.0360894	0.0383914	0.0120459	0.062603	0.0178147
3722	A	0.0947044	0.056693	0.0769574	0.0994813	0.038891	0.0238581	0.0460838	0.0690088	0.045473	0.100339	0.0357236	0.0167092	0.0365795	0.0274424
3723	A	0.12348	0.0889438	0.0819782	0.10713	0.0229913	0.0405086	0.108071	0.0925983	0.111517	0.0970309	0.014128	0.0164628	0.0887818	0.123679
3727	A	0.0638202	0.0713855	0.0641427	0.0606244	0.0245744	0.0201008	0.0504984	0.0506966	0.0376559	0.0366409	0.016276	0.00470057	0.0275799	0.0268271
3728	A	0.0331366	0.0351927	0.0395287	0.0435192	0.0182027	0.0211536	0.0869154	0.092098	0.0834128	0.098635	0.0330415	0.0536415	0.0334778	0.131393
3731	A	0.172115	0.153645	0.130919	0.165738	0.0759312	0.054615	0.076397	0.0767956	0.146506	0.0850517	0.0394807	0.0697988	0.0741339	0.0484928
3732	A	0.160876	0.151036	0.121014	0.199225	0.10615	0.0963195	0.093006	0.10287	0.0872395	0.0829947	0.0255084	0.0504311	0.0990988	0.0541911
3741	A	0.104679	0.0947226	0.0617861	0.1	0.064277	0.0635257	0.0282828	0.026409	0.0391645	0.021798	0.0267777	0.041579	0.0724969	0.0253475
3742	A	0.188731	0.128378	0.0956952	0.167634	0.0922059	0.0948204	0.0607804	0.0463545	0.0496849	0.0581121	0.0463053	0.0595994	0.113547	0.0568768
3743	A	0.0974184	0.0688206	0.0615921	0.104154	0.0683013	0.0718068	0.0429685	0.0690946	0.0605933	0.0604661	0.0442217	0.0522057	0.10218	0.0468165
3751	A	0.134494	0.113859	0.0970031	0.112644	0.0798979	0.0812682	0.142391	0.140701	0.0880812	0.154767	0.114753	0.0913321	0.076039	0.0916072
3754	A	0.0440831	0.0335455	0.049933	0.0674639	0.0273058	0.0314815	0.0875007	0.0670582	0.0672464	0.0835949	0.0366127	0.0279504	0.0439962	0.0290023
3755	a	0.70996	0.764639	0.811774	0.714458	0.787302	0.52458	0.709987	0.620664	0.528132	0.761733	0.582821	0.52165	0.573465	0.474784
3758	A	0.0517551	0.0370871	0.0370685	0.04385	0.0143064	0.00904259	0.0927162	0.114665	0.0949625	0.108549	0.0437154	0.0140039	0.0504369	0.0646053
3761	A	0.0830038	0.080174	0.0698738	0.0819067	0.03595	0.0147911	0.063845	0.0762149	0.057122	0.0672846	0.0230492	0.0284252	0.0603118	0.0270846
3769	A	0.097604	0.104297	0.0851659	0.1117	0.044578	0.0205115	0.0960595	0.0869792	0.0588711	0.0906947	0.0469841	0.0380381	0.0477811	0.0315657
3770	A	0.192639	0.178615	0.172265	0.193358	0.183964	0.0789691	0.0593946	0.0630668	0.068614	0.0581977	0.0335841	0.021106	0.109391	0.0297724
3774	A	0.134849	0.157211	0.111493	0.138584	0.0421463	0.0257485	0.134563	0.126278	0.121345	0.116922	0.0845693	0.0401149	0.0914852	0.0772637
3778	A	0.105734	0.116297	0.100967	0.109965	0.045451	0.0597757	0.166683	0.161101	0.209795	0.152402	0.131891	0.0726789	0.129101	0.10072
3779	A	0.0537712	0.0520165	0.046001	0.0364094	0.0297505	0.031341	0.178148	0.129191	0.130551	0.115649	0.0921214	0.0575421	0.0676453	0.0817364
3780	a	0.234744	0.261795	0.256675	0.256986	0.200776	0.232264	0.203836	0.261969	0.18939	0.29048	0.171836	0.290157	0.330167	0.340567
3790	A	0.118357	0.100768	0.0803437	0.0959783	0.0222433	0.0241665	0.0443356	0.0713863	0.0846449	0.044809	0.0479105	0.0240993	0.0870742	0.0590805
3794	A	0.130791	0.127425	0.0765915	0.124958	0.0207679	0.0110272	0.0325068	0.032979	0.0330469	0.0361634	0.0145165	0.00763024	0.0271829	0.00682839
3795	A	0.0942071	0.106141	0.070808	0.0944888	0.0332837	0.0301561	0.0624209	0.0306766	0.0546114	0.058569	0.0143554	0.011309	0.0786364	0.0506346
3798	A	0.105662	0.0755409	0.0631571	0.0924717	0.0446361	0.0461089	0.0666235	0.0447384	0.062415	0.0608173	0.041751	0.0348452	0.0604217	0.0378814
3802	A	0.0567573	0.0540638	0.0380387	0.048949	0.0288603	0.0202615	0.0687356	0.063088	0.107557	0.0771921	0.0725134	0.0447711	0.0363307	0.0851931
3808	A	0.0959429	0.12431	0.111295	0.125557	0.0734859	0.0713385	0.0623668	0.0880067	0.062415	0.0547478	0.0330449	0.0157097	0.104975	0.0514854
3811	A	0.078151	0.082631	0.0678052	0.0943831	0.0247852	0.0153681	0.0629184	0.0451209	0.041517	0.0499244	0.0191322	0.0179843	0.0488516	0.0348902
3812	A	0.0572722	0.0757529	0.0534896	0.0617511	0.0239536	0.0213727	0.0893481	0.0595071	0.0962867	0.0715318	0.0636525	0.032738	0.058828	0.0529321
3816	A	0.101084	0.0827739	0.0946578	0.109467	0.0432246	0.0360442	0.111672	0.0658539	0.0669037	0.0908545	0.0372473	0.0466908	0.0817281	0.0682442
3819	A	0.0980873	0.0515378	0.057823	0.0911334	0.0572602	0.0454471	0.11699	0.126173	0.14499	0.113002	0.0418454	0.0297133	0.0476688	0.0857189
3820	a	0.565933	0.509719	0.554857	0.51592	0.439161	0.287593	0.751053	0.738428	0.795158	0.814104	0.583957	0.407319	0.411447	0.491617
3823	A	0.194723	0.20897	0.173854	0.19644	0.0355311	0.0360578	0.15869	0.123205	0.13943	0.122081	0.112412	0.082721	0.140179	0.123383
3825	a	0.568574	0.58401	0.588151	0.570555	0.544269	0.592889	0.329381	0.314513	0.30798	0.298779	0.248618	0.316298	0.631177	0.442491
3831	A	0.15448	0.150683	0.137079	0.164655	0.153212	0.0984647	0.126974	0.145898	0.114947	0.115596	0.080973	0.0622208	0.0971455	0.101346
3840	A	0.118914	0.144311	0.0982791	0.17765	0.108961	0.0715396	0.0705338	0.0592271	0.0766636	0.0505466	0.0703616	0.0222977	0.0981213	0.0224849
3844	A	0.147109	0.118758	0.117619	0.185563	0.127395	0.0934143	0.0430382	0.0302538	0.0459965	0.0475524	0.0398938	0.0332353	0.0992556	0.0367248
3847	A	0.0795967	0.0836038	0.0645584	0.0955543	0.0607591	0.0259057	0.05799	0.0698668	0.0752266	0.0589416	0.0329249	0.0167426	0.0877659	0.0463292
3851	A	0.251969	0.228204	0.221508	0.286469	0.169724	0.108985	0.130041	0.160968	0.152992	0.118717	0.090879	0.0780996	0.180966	0.0600429
3855	A	0.151127	0.156517	0.150578	0.198595	0.13365	0.0768502	0.0535398	0.0392687	0.0407644	0.0607445	0.0341591	0.0282998	0.120678	0.0417848
3856	A	0.252178	0.229629	0.191794	0.253095	0.194016	0.165769	0.0454452	0.0641381	0.0539339	0.0609578	0.042386	0.0417767	0.18462	0.0449499
3857	A	0.172448	0.129004	0.158989	0.189494	0.138328	0.158831	0.0580279	0.0658492	0.0458415	0.0678697	0.0261892	0.0201079	0.174292	0.040512
3860	A	0.112778	0.134456	0.131077	0.160004	0.107245	0.103963	0.113118	0.129861	0.153211	0.151161	0.119849	0.1158	0.158741	0.149382
3862	a	0.985684	0.891501	0.921843	0.975166	0.824317	0.684891	0.248013	0.27756	0.248955	0.295504	0.163243	0.179284	0.729652	0.228751
3866	A	0.17692	0.160334	0.156947	0.171303	0.142939	0.147052	0.102105	0.123065	0.131008	0.0938148	0.130324	0.0928859	0.209482	0.0768935
3867	A	0.219888	0.506161	0.61518	0.959172	0.185648	0.218397	0.0888458	0.301505	0.474562	0.774605	0.142124	0.12043	0.26605	0.0964807
3871	A	0.109172	0.120822	0.144252	0.109574	0.102544	0.104709	0.118498	0.131176	0.157709	0.0727293	0.108291	0.102143	0.141615	0.099979
3872	A	0.138485	0.143655	0.15049	0.146843	0.140924	0.135035	0.116716	0.137854	0.192015	0.124516	0.0888329	0.171491	0.159883	0.126871
3885	A	0.210059	0.273175	0.249247	0.21029	0.204442	0.114928	0.103729	0.123715	0.0989959	0.111211	0.0911604	0.0503533	0.145998	0.0789453
3886	A	0.131823	0.118377	0.0988758	0.131871	0.0890276	0.0606766	0.0961649	0.114151	0.0977019	0.104808	0.0926452	0.0454258	0.0930757	0.0757158
3889	A	0.188183	0.175678	0.207588	0.229108	0.164133	0.165063	0.163304	0.165714	0.213153	0.132588	0.15716	0.201358	0.173414	0.14806
3896	A	0.125777	0.139182	0.139048	0.173201	0.104102	0.0872557	0.0862042	0.0977368	0.128642	0.0859779	0.101441	0.0869493	0.0862631	0.0768658
3897	A	0.0956845	0.0759611	0.069567	0.106646	0.0769719	0.0572122	0.0488873	0.0657774	0.064377	0.0580097	0.0429884	0.0496507	0.0736245	0.04758
3898	A	0.115981	0.0924956	0.0765213	0.101009	0.0657494	0.0960282	0.120573	0.147411	0.122898	0.110767	0.0929984	0.085686	0.0604339	0.0762631
3900	A	0.105139	0.103021	0.105724	0.111632	0.0706961	0.0420756	0.0843637	0.0668489	0.0857641	0.097145	0.0636446	0.0571996	0.0792773	0.057538
3901	A	0.0920845	0.106053	0.10737	0.112303	0.076162	0.0414724	0.0807162	0.0903369	0.146982	0.0781052	0.0891004	0.173484	0.0680964	0.093344
3903	A	0.122574	0.105901	0.0756594	0.134345	0.0343761	0.0519072	0.0494932	0.0677035	0.104303	0.0583315	0.0659617	0.10077	0.072957	0.076302
3912	A	0.0574582	0.0482592	0.040541	0.0608351	0.022084	0.0244476	0.0433501	0.0645631	0.0741964	0.0669527	0.0334342	0.0202106	0.0377473	0.032796
3918	A	0.0857675	0.0517134	0.0569088	0.0720162	0.0347387	0.012327	0.0724773	0.0736301	0.072306	0.0529483	0.0582662	0.0215547	0.0503845	0.0384298
3923	A	0.125025	0.119185	0.0862915	0.125531	0.02521	0.0310438	0.0591826	0.0709408	0.0583659	0.0606476	0.0458345	0.0369153	0.0525292	0.0534935
3931	A	0.115768	0.124906	0.0790859	0.147838	0.0703781	0.060953	0.0939999	0.0847273	0.0941196	0.0838574	0.0743187	0.0797201	0.0829783	0.100728
3937	A	0.105077	0.108415	0.0925412	0.134124	0.0685675	0.0526316	0.0972961	0.129435	0.093044	0.0748464	0.0756855	0.0538788	0.111899	0.0746762
3938	A	0.131711	0.11263	0.0933204	0.1292	0.059712	0.0654672	0.131812	0.145177	0.144656	0.156311	0.105813	0.102099	0.136878	0.0945353
3940	A	0.0923262	0.094304	0.103418	0.116802	0.0796338	0.0841099	0.0839241	0.0933548	0.0944937	0.0939841	0.0988591	0.0477943	0.0898755	0.0650089
3942	A	0.104026	0.124722	0.118473	0.161404	0.0873691	0.0811079	0.0881336	0.112751	0.120771	0.09243	0.0603007	0.0605177	0.0930325	0.102376
3944	A	0.115248	0.135093	0.103986	0.129698	0.0593045	0.0843454	0.101503	0.120464	0.115381	0.100394	0.0555533	0.100304	0.119023	0.0993272
3947	A	0.13158	0.0925783	0.0675751	0.119623	0.0727942	0.057671	0.180584	0.170091	0.187314	0.19416	0.157814	0.166481	0.0805928	0.213329
3949	A	0.10591	0.0996098	0.0855732	0.134319	0.0522253	0.0498358	0.122672	0.117763	0.145299	0.109306	0.119434	0.0703156	0.0941699	0.0963245
3955	A	0.114113	0.109602	0.0975823	0.133983	0.0564147	0.0512773	0.172008	0.146343	0.133186	0.150456	0.132425	0.10044	0.112503	0.14048
3957	A	0.0866308	0.0867686	0.0727374	0.0795703	0.0450048	0.0322737	0.0645161	0.0724667	0.0664946	0.0512245	0.0340165	0.0269345	0.0575595	0.0516611
3958	A	0.0563376	0.0691877	0.0702008	0.0703881	0.035786	0.0203599	0.0792715	0.0898436	0.0734876	0.0732727	0.0585812	0.0367576	0.0615282	0.0605381
3960	A	0.102932	0.0795317	0.0866136	0.12603	0.0482305	0.0337536	0.0447605	0.0417567	0.05962	0.0782447	0.0467803	0.03346	0.070732	0.0632389
3961	A	0.132102	0.15041	0.111455	0.163531	0.0723815	0.0610459	0.12476	0.140734	0.13324	0.11681	0.0920775	0.152855	0.128546	0.119693
3967	A	0.16243	0.158931	0.135365	0.171012	0.0893644	0.0932492	0.108345	0.103427	0.101883	0.125171	0.0980987	0.100414	0.137011	0.111951
3998	A	0.0831374	0.0888802	0.0755485	0.10295	0.0260654	0.0196682	0.0340702	0.0370393	0.0463593	0.0361103	0.0207702	0.0161856	0.0543415	0.0338021
4041	A	0.151311	0.147109	0.122615	0.211369	0.0655578	0.0461112	0.0403024	0.0495992	0.0478268	0.0448528	0.0520781	0.0343299	0.0832233	0.0448123
4042	A	0.130139	0.12975	0.092078	0.156883	0.079158	0.0418476	0.0562807	0.0468193	0.0381582	0.0542543	0.032098	0.0253993	0.0731307	0.0325594
4043	A	0.148501	0.129304	0.0556211	0.179732	0.0896176	0.0664415	0.0607334	0.0613589	0.0463346	0.0849736	0.0295814	0.0287643	0.0714777	0.0734307
4045	A	0.0756859	0.0851037	0.0696113	0.103743	0.0452257	0.0232188	0.0474564	0.0613427	0.0417163	0.0541921	0.0362987	0.0236714	0.0705889	0.0306679
4048	A	0.0609256	0.0525632	0.0630148	0.0664421	0.0469801	0.0420705	0.19023	0.182917	0.250488	0.186778	0.16386	0.0922884	0.0481416	0.0913915
4051	A	0.0365964	0.0391284	0.0317638	0.0393273	0.0345083	0.0317847	0.0759756	0.0660673	0.067774	0.0546222	0.0570551	0.019604	0.0382878	0.0391714
4057	A	0.0929204	0.0598645	0.0608735	0.0795216	0.0433654	0.0229543	0.1211	0.103666	0.0840768	0.109075	0.0918332	0.160066	0.0579329	0.122484
4068	A	0.09757	0.0672407	0.0721896	0.0846376	0.0294613	0.0233395	0.0846929	0.0704871	0.0911151	0.0722249	0.0564959	0.0497723	0.0511001	0.0668998
4072	A	0.0977215	0.102372	0.0895938	0.108284	0.0558304	0.0368503	0.0480968	0.0614715	0.0673241	0.0502333	0.053507	0.0463549	0.0605033	0.0377302
4080	A	0.17087	0.196068	0.142268	0.207155	0.142328	0.145416	0.213383	0.219914	0.278704	0.209739	0.193369	0.211858	0.149038	0.207341
4093	A	0.0689069	0.0637822	0.0582103	0.111004	0.0608233	0.0788968	0.149985	0.141221	0.158029	0.159943	0.143261	0.151486	0.137113	0.148833
4100	A	0.0830468	0.0825054	0.0601172	0.13298	0.0800454	0.0620265	0.0503691	0.0512464	0.0771516	0.0620359	0.0469451	0.0419094	0.0895238	0.058042
4122	A	0.562709	0.642097	0.826375	0.43389	0.764411	0.783342	0.177555	0.150521	0.17506	0.120263	0.142746	0.188229	0.620441	0.115296
4123	A	0.0964828	0.120862	0.170642	0.113364	0.279154	0.160393	0.0500131	0.0441133	0.0425874	0.0635873	0.0287259	0.0517682	0.228466	0.0574417
4152	A	0.0346811	0.0339629	0.0167048	0.0557177	0.0269428	0.0182189	0.0280224	0.0484925	0.0379956	0.0500594	0.0242812	0.0123971	0.0477119	0.0305742
4165	A	0.0487786	0.0715308	0.0330666	0.0659865	0.0208353	0.023756	0.0551734	0.0286325	0.0487634	0.066229	0.028661	0.0274725	0.0617014	0.0693179
4167	A	0.0764436	0.0627555	0.0573458	0.0409207	0.0273845	0.0366581	0.0758389	0.0727593	0.0683313	0.0667098	0.0423175	0.0509684	0.0791171	0.0522548
4173	A	0.0972799	0.112593	0.120838	0.102392	0.0311687	0.041136	0.0527774	0.0557998	0.0718686	0.077458	0.0258799	0.0347017	0.122665	0.0475662
4181	A	0.0477465	0.076261	0.0752307	0.0902507	0.0404755	0.0485373	0.0630629	0.0514303	0.0440323	0.0527674	0.0314434	0.0426527	0.0502917	0.0386079
4187	A	0.101292	0.099885	0.121336	0.100239	0.0610974	0.0305877	0.113968	0.104885	0.108134	0.0663876	0.0891707	0.069972	0.0890798	0.0638388
4198	A	0.0603977	0.0841569	0.0583208	0.0759199	0.0550028	0.0721357	0.110269	0.10277	0.09691	0.0833032	0.0874093	0.0674338	0.0868925	0.0870377
4200	A	0.083885	0.0862904	0.0893246	0.126749	0.0779917	0.0564902	0.0612193	0.084458	0.0644532	0.0662702	0.0567204	0.0329012	0.0675035	0.0531836
4207	A	0.0716152	0.0532085	0.0307731	0.0586669	0.0470184	0.0276666	0.0361295	0.0526212	0.0480553	0.0290777	0.0424982	0.0491033	0.0431939	0.0281345
4208	A	0.0440006	0.0561364	0.0572522	0.0691455	0.0362794	0.0210133	0.0872715	0.0794294	0.0499251	0.077293	0.0294096	0.0148844	0.080552	0.0662079
4209	A	0.0800717	0.0979107	0.049942	0.0844219	0.0521659	0.0230589	0.0461353	0.0662416	0.0640715	0.0515597	0.0312133	0.0148772	0.0531027	0.0561449
4214	A	0.0922957	0.0714977	0.0729361	0.0985894	0.0574247	0.0369426	0.169794	0.19938	0.328251	0.141732	0.196501	0.205739	0.0790616	0.117401
4215	a	0.062398	0.0574163	0.0586237	0.0880711	0.0685275	0.0503743	0.0764685	0.0853862	0.109521	0.0695995	0.096739	0.0590435	0.0767715	0.029168
4219	A	0.179467	0.119745	0.123314	0.135384	0.0932791	0.069428	0.0806164	0.136558	0.124022	0.0995581	0.0917472	0.104286	0.0962725	0.0960584
4228	A	0.0711136	0.0513799	0.0639073	0.075038	0.0493161	0.0220376	0.114369	0.125139	0.14664	0.08254	0.0811896	0.112407	0.0542143	0.091353
4229	A	0.112258	0.0793266	0.0818209	0.10981	0.0822747	0.050888	0.0932495	0.0698783	0.0973584	0.0828821	0.0769544	0.0705693	0.045814	0.0362622
4234	A	0.114474	0.100563	0.117955	0.194798	0.0929445	0.0747748	0.236939	0.272213	0.301645	0.187478	0.223355	0.197739	0.131695	0.186511
4239	A	0.110922	0.11862	0.0956578	0.133401	0.0580003	0.073205	0.0692077	0.0991396	0.0914043	0.0803092	0.0666425	0.0959733	0.136979	0.0839695
4243	A	0.145089	0.0761351	0.0576193	0.133297	0.0988861	0.0556671	0.0643543	0.0785841	0.0925926	0.0725977	0.0847864	0.0613186	0.065349	0.0699505
4246	A	0.108751	0.130498	0.104966	0.137753	0.0671955	0.0421357	0.0991785	0.0718907	0.101404	0.108879	0.0630201	0.0513182	0.106095	0.0450027
4248	A	0.0832253	0.0809741	0.0783051	0.0902087	0.0509376	0.0673124	0.0498812	0.0626117	0.0714031	0.0758537	0.0395361	0.0377822	0.0905301	0.0413608
4250	A	0.0551268	0.0548392	0.0719034	0.0408178	0.0406396	0.0267132	0.0548681	0.039266	0.0322836	0.0530215	0.0276351	0.0279122	0.0561285	0.0338409
4251	A	0.0579411	0.0736279	0.0422895	0.0370181	0.0264414	0.0171329	0.0286144	0.0314536	0.0399981	0.0341345	0.0193858	0.00367789	0.0388098	0.0217978
4252	A	0.0631712	0.0695541	0.0703669	0.067786	0.0153953	0.0108512	0.031525	0.0471752	0.0517039	0.0274149	0.0123136	0.0106691	0.0534738	0.014742
4263	A	0.133976	0.1168	0.0973984	0.13734	0.0828793	0.0349396	0.0552616	0.0529714	0.0597646	0.057576	0.0292321	0.0239481	0.0800077	0.0658795
4266	A	0.103131	0.130106	0.086218	0.141595	0.0828855	0.080074	0.0861315	0.0756368	0.116817	0.0935575	0.0761425	0.103238	0.12099	0.100772
4268	A	0.173663	0.186791	0.194182	0.23439	0.153389	0.0835596	0.493245	0.470941	0.440428	0.453172	0.410494	0.411412	0.145545	0.368199
4269	A	0.125267	0.152135	0.0919505	0.180453	0.0649126	0.0710267	0.292416	0.277418	0.319881	0.247616	0.270862	0.279451	0.0831414	0.245484
4274	A	0.191076	0.165934	0.159126	0.152618	0.133266	0.16832	0.301277	0.314976	0.266451	0.234824	0.216631	0.263992	0.184495	0.256674
4275	A	0.198671	0.215591	0.166115	0.200438	0.144203	0.142234	0.367748	0.368895	0.279066	0.332142	0.251647	0.270035	0.196766	0.289717
4276	A	0.113175	0.143029	0.0784767	0.111027	0.0810512	0.0589219	0.0489005	0.0518695	0.0629069	0.066541	0.0367342	0.0343754	0.0964698	0.0587199
4277	A	0.098721	0.0852357	0.0579805	0.091983	0.0531898	0.0430766	0.0447796	0.0357403	0.0426406	0.0445546	0.0272615	0.0172298	0.0870447	0.0519606
4287	A	0.119659	0.0834496	0.0668458	0.112263	0.0480723	0.0325064	0.0697867	0.0582968	0.0731634	0.0567144	0.0336511	0.0213311	0.0695224	0.0321773
4293	A	0.0741356	0.0840315	0.0544966	0.106003	0.0439657	0.0118622	0.168706	0.163082	0.166667	0.156113	0.0691922	0.0694391	0.055142	0.167468
4299	A	0.0774024	0.0648379	0.0455972	0.0887887	0.0472623	0.0330782	0.11011	0.098481	0.101934	0.0860944	0.0512115	0.0412866	0.0500414	0.0488052
4302	A	0.0615648	0.0607981	0.0669521	0.0746028	0.0391333	0.0188123	0.195716	0.182197	0.139602	0.212084	0.0566121	0.0361279	0.034097	0.118167
4305	A	0.147531	0.131057	0.114395	0.119892	0.0468577	0.0200999	0.0632433	0.0673444	0.0640907	0.0581829	0.050513	0.0291121	0.0534564	0.0360381
4306	A	0.0971679	0.0788486	0.0703644	0.0907698	0.0268384	0.0276459	0.0586139	0.0576747	0.0875922	0.0762058	0.0383028	0.0228358	0.0727592	0.0492508
4308	A	0.0374453	0.0366134	0.0450711	0.0639522	0.0321054	0.0286692	0.0654705	0.060635	0.053234	0.0597412	0.0538256	0.0171145	0.028109	0.0445147
4310	A	0.104209	0.0871653	0.0898549	0.0955436	0.0373679	0.0307176	0.237679	0.226127	0.301442	0.169952	0.199867	0.0947453	0.0652488	0.114429
4312	A	0.110719	0.104215	0.0948122	0.112199	0.0406316	0.0210899	0.0954038	0.111786	0.0850134	0.0875721	0.029707	0.0156405	0.0568593	0.0616654
4318	A	0.133533	0.137219	0.137332	0.140144	0.0699344	0.0490787	0.13001	0.115471	0.167287	0.141271	0.0678176	0.0749319	0.118842	0.0983425
4319	A	0.14299	0.154753	0.13626	0.154887	0.0789873	0.0636046	0.0446314	0.0687584	0.0642334	0.036696	0.0272278	0.0250125	0.10579	0.0410021
4320	A	0.12114	0.148123	0.126384	0.12903	0.0836964	0.0851789	0.068135	0.0916656	0.13511	0.0994662	0.0733166	0.0893316	0.152767	0.0664318
4331	A	0.131563	0.0798641	0.0819448	0.124556	0.0673055	0.0643075	0.124336	0.171619	0.134539	0.122545	0.103192	0.14869	0.0958414	0.144117
4334	A	0.16965	0.142496	0.10767	0.123399	0.0336927	0.0376393	0.0721005	0.0543707	0.0701327	0.0717707	0.0430212	0.0189251	0.125966	0.0602277
4343	A	0.119393	0.0679429	0.0780572	0.133509	0.0505614	0.0273798	0.0343059	0.0190236	0.0371423	0.0440989	0.0221824	0.0104727	0.0719765	0.009812
4357	A	0.0864588	0.108598	0.0827851	0.0868576	0.076848	0.0665705	0.0766076	0.0762699	0.101251	0.0722577	0.0515094	0.0375903	0.0773938	0.0309417
4358	A	0.177607	0.16742	0.176116	0.21027	0.140564	0.0966643	0.12442	0.138769	0.230281	0.165022	0.126829	0.125922	0.0935294	0.09247
4361	A	0.127265	0.128969	0.130179	0.15067	0.10306	0.132316	0.133993	0.146588	0.194729	0.13945	0.119291	0.159827	0.135406	0.122555
4364	A	0.129828	0.123672	0.0994742	0.150633	0.0937998	0.0765391	0.104411	0.167026	0.136387	0.13215	0.105288	0.0775837	0.0829664	0.086881
4371	A	0.0824512	0.0550615	0.0598877	0.0891307	0.0678122	0.0444234	0.0551492	0.0669207	0.0458933	0.0714861	0.0732695	0.0472469	0.0792636	0.0538989
4373	A	0.0447156	0.0484646	0.0232079	0.0614779	0.0197834	0.0284042	0.0514456	0.0427796	0.0434021	0.0582728	0.0504696	0.0269227	0.0433814	0.0242461
4374	A	0.0575283	0.032204	0.0340201	0.0490512	0.0223293	0.0127176	0.0461095	0.0598548	0.0547385	0.0630271	0.0292969	0.0101843	0.0349206	0.0303744
4375	A	0.0407065	0.0609426	0.0548817	0.0448375	0.0119254	0.014189	0.0423824	0.0548358	0.0446289	0.0455344	0.0144404	0.00522487	0.0367423	0.0271799
4376	A	0.0691334	0.0683271	0.0487475	0.0720329	0.0247596	0.0153548	0.0360356	0.0412048	0.0518396	0.0418989	0.0125395	0.0116158	0.0438198	0.0371542
4380	A	0.134502	0.115402	0.0975253	0.137469	0.0833811	0.0537105	0.0662234	0.0697257	0.0754279	0.0673069	0.0338185	0.0310124	0.0934646	0.0461662
4383	A	0.0717595	0.0562665	0.0762117	0.102919	0.0520592	0.0464528	0.113132	0.122303	0.11863	0.0930699	0.0447697	0.107502	0.0996629	0.129383
4385	A	0.0784363	0.108789	0.109589	0.106083	0.0894204	0.0790127	0.194738	0.213463	0.225365	0.130774	0.133978	0.141661	0.126975	0.12894
4389	A	0.11424	0.0885266	0.0950796	0.0817547	0.0715678	0.0542633	0.0738341	0.0742643	0.0607145	0.0944301	0.0565256	0.0413357	0.0757441	0.0748412
4391	A	0.115582	0.0809886	0.0930571	0.111954	0.0529167	0.041556	0.048072	0.0392317	0.028911	0.0217306	0.0245019	0.0246363	0.0900735	0.0282276
4392	A	0.0778431	0.0605952	0.0575971	0.0672992	0.0410632	0.0372978	0.0790549	0.0501405	0.0485382	0.0713225	0.0185122	0.0161184	0.0924925	0.0329914
4409	A	0.0494903	0.0786303	0.0771103	0.0541663	0.0438955	0.0607692	0.0442434	0.0455748	0.044832	0.0393767	0.0213092	0.0347515	0.0765895	0.0412266
4410	A	0.0506495	0.0631517	0.0582481	0.0822972	0.0493447	0.0598709	0.0481634	0.0379479	0.0491325	0.0641249	0.0296196	0.011928	0.083761	0.0436934
4417	A	0.0707558	0.0450882	0.0498675	0.0827315	0.0262294	0.0212019	0.0315735	0.0768541	0.0541093	0.0608791	0.0109456	0.0142913	0.0880499	0.0647588
4419	A	0.114415	0.116563	0.0753815	0.0894654	0.0635403	0.0537451	0.108639	0.0856996	0.122273	0.0932269	0.0629956	0.0756232	0.0619445	0.113978
4423	A	0.0913868	0.104963	0.0480288	0.0935313	0.0350255	0.0375916	0.066328	0.0720641	0.0804541	0.0684772	0.0423605	0.0221078	0.0504291	0.0332854
4436	A	0.0814895	0.0821329	0.0847418	0.134825	0.0335675	0.012667	0.0366511	0.060818	0.0523806	0.0403614	0.012774	0.011223	0.0722654	0.0573235
4444	A	0.0737251	0.0760715	0.0628465	0.0836592	0.0563842	0.0372664	0.0506858	0.030477	0.0214569	0.0402022	0.0127073	0.0259273	0.0546332	0.0454704
4459	A	0.077203	0.125274	0.0893995	0.109558	0.039166	0.0274267	0.0687891	0.0260853	0.0377893	0.0504199	0.0213797	0.00769195	0.0733284	0.0307702
4462	A	0.119781	0.145851	0.140654	0.193326	0.0630979	0.0317951	0.0766545	0.076556	0.0524991	0.0860396	0.0187899	0.0125446	0.126212	0.0691329
4468	A	0.218059	0.175085	0.171623	0.261116	0.0982888	0.0518276	0.0504448	0.0610863	0.0502729	0.0333278	0.0303219	0.0321552	0.122079	0.0399298
4469	A	0.156771	0.179915	0.113853	0.234106	0.0868588	0.0609317	0.0588819	0.0488349	0.044939	0.0550349	0.0488717	0.0214693	0.0536428	0.0285743
4472	A	0.140816	0.13016	0.0917676	0.135379	0.0555673	0.0819441	0.0688297	0.0832335	0.0638041	0.0772798	0.0518378	0.0392424	0.145291	0.0666778
4474	A	0.165679	0.123358	0.0953531	0.165236	0.114867	0.0536311	0.0590348	0.0663807	0.0564254	0.0372307	0.0397377	0.0267019	0.0914896	0.0399737
4475	A	0.200855	0.197981	0.0852919	0.200096	0.0654748	0.0313844	0.110279	0.106198	0.117119	0.118599	0.052584	0.0093043	0.116402	0.106514
4479	A	0.0932468	0.0901423	0.0620771	0.0665466	0.0669587	0.0321802	0.0307583	0.035274	0.0349382	0.0401542	0.00824144	0.0147021	0.0493755	0.027324
4482	A	0.0943396	0.068285	0.0432109	0.0710079	0.0509898	0.107787	0.0826781	0.0470869	0.0682115	0.0637766	0.0629123	0.0171944	0.0618429	0.0299321
4483	A	0.0382307	0.0830163	0.0404654	0.0762195	0.0789458	0.0596147	0.0338138	0.0458362	0.0614227	0.0305354	0.0291322	0.0215279	0.0474334	0.0268198
4491	A	0.0554455	0.0475511	0.0594862	0.0790063	0.046322	0.0477023	0.0586473	0.0744308	0.0482992	0.0880102	0.050049	0.021948	0.0564122	0.070101
4498	A	0.0668829	0.089382	0.0811334	0.170673	0.0497735	0.0349993	0.0297924	0.0271644	0.0376695	0.0409318	0.021734	0.0201403	0.0458786	0.0163434
4502	A	0.136743	0.171388	0.108981	0.161564	0.102041	0.0625207	0.0942063	0.0936469	0.0674513	0.0781587	0.0593224	0.0633496	0.112929	0.075517
4505	A	0.140939	0.194227	0.173346	0.246764	0.0451323	0.0867961	0.049709	0.0647012	0.0567443	0.0916705	0.0334403	0.0221231	0.0819299	0.0392773
4506	A	0.157045	0.169262	0.164773	0.122614	0.109996	0.0432292	0.0734338	0.0588787	0.105238	0.0549126	0.0383635	0.0205523	0.0616326	0.0496436
4508	A	0.192957	0.168628	0.203189	0.222672	0.142596	0.106022	0.0615385	0.109992	0.106126	0.0853862	0.0954285	0.0791363	0.149653	0.0862674
4512	A	0.17404	0.168473	0.120966	0.162891	0.101776	0.0889299	0.231211	0.217319	0.2674	0.214028	0.159519	0.201424	0.0978953	0.202938
4513	A	0.125711	0.118034	0.0625411	0.151981	0.0559114	0.0748162	0.100399	0.163304	0.135271	0.115001	0.11431	0.167988	0.104379	0.133619
4518	a	0.690253	0.756791	0.595763	0.65388	0.568357	0.518857	0.329908	0.283838	0.273028	0.337417	0.226155	0.222601	0.578863	0.310988
4528	A	0.0498167	0.0443927	0.0275705	0.053357	0.0707874	0.033492	0.0463753	0.0728763	0.0581088	0.0795945	0.0707364	0.0635923	0.0597956	0.0555808
4530	A	0.0417296	0.0646305	0.03944	0.0621545	0.0393975	0.0481739	0.0847382	0.0842927	0.103058	0.0864937	0.0543975	0.0778892	0.0550835	0.0605709
4539	A	0.195827	0.158638	0.135333	0.226196	0.0860375	0.108481	0.154152	0.13593	0.157265	0.120134	0.110599	0.0923468	0.112522	0.115637
4541	A	0.133068	0.118963	0.0759619	0.122837	0.114262	0.0749868	0.115338	0.117197	0.0924838	0.125447	0.0942232	0.0852993	0.124287	0.0703288
4543	A	0.159058	0.145632	0.0936245	0.229452	0.123196	0.102135	0.352652	0.269628	0.251292	0.354367	0.338683	0.236921	0.184855	0.311376
4548	A	0.116377	0.0810758	0.0583099	0.12572	0.0980217	0.0508784	0.0751732	0.0493153	0.0673089	0.065318	0.0446463	0.0241887	0.0540494	0.0510955
4554	A	0.105205	0.0948972	0.0566095	0.149526	0.119821	0.0565387	0.0688824	0.103819	0.0926541	0.08358	0.0658538	0.0535255	0.0663102	0.0528148
4559	A	0.228378	0.205916	0.112932	0.227588	0.189575	0.0995833	0.144646	0.188871	0.151091	0.154953	0.164695	0.0646308	0.111619	0.0961244
4563	A	0.198747	0.211765	0.113589	0.27441	0.19231	0.0903235	0.0681676	0.0843534	0.0688878	0.0773002	0.0301283	0.0211368	0.140284	0.053989
4566	a	0.299401	0.317558	0.302989	0.339292	0.324156	0.321562	0.207796	0.268848	0.258919	0.267804	0.222139	0.287047	0.425065	0.431965
4579	A	0.20161	0.187589	0.161997	0.243545	0.149145	0.097043	0.291092	0.246673	0.259102	0.203551	0.216413	0.176749	0.154192	0.193512
4584	A	0.0521157	0.0640312	0.0691628	0.11095	0.0334225	0.0366021	0.0417278	0.029409	0.0458621	0.034161	0.0156922	0.0184849	0.0528431	0.021638
4585	a	0.510095	0.606822	0.564127	0.566407	0.576345	0.369478	0.0884146	0.108619	0.11285	0.124174	0.0775254	0.0570968	0.422235	0.0917266
4594	A	0.106339	0.102718	0.0521528	0.136989	0.0436064	0.0295582	0.0346227	0.0520694	0.0306266	0.0448462	0.0185291	0.015239	0.0779782	0.0319122
4597	A	0.0913505	0.0957093	0.0705305	0.124385	0.0236072	0.029001	0.0557476	0.0611038	0.0565756	0.0535332	0.0331991	0.0152735	0.0603038	0.050906
4600	A	0.168074	0.126976	0.0840489	0.135146	0.0474794	0.0541272	0.0644908	0.0703437	0.0480928	0.0840925	0.0335086	0.0315268	0.0928786	0.0469081
4602	A	0.08134	0.0702905	0.0563317	0.0736044	0.0298087	0.0271475	0.038625	0.0479549	0.043283	0.0400946	0.0257979	0.026824	0.0437951	0.0481742
4605	A	0.113002	0.0871195	0.100239	0.123639	0.054338	0.0393833	0.051304	0.0685731	0.0377337	0.0616756	0.0220715	0.0239157	0.0695612	0.0410256
4606	A	0.0905368	0.092155	0.0557135	0.0979349	0.0433782	0.0232761	0.058142	0.0493333	0.0472655	0.0446173	0.0204648	0.0288385	0.039241	0.0357289
4611	A	0.0496025	0.0432954	0.0517148	0.101807	0.0244328	0.0308188	0.0703777	0.0555316	0.0479265	0.0424927	0.0336596	0.0519716	0.0383207	0.0631838
4617	A	0.0488005	0.0279683	0.0335004	0.0343117	0.0295895	0.0605099	0.0520771	0.0566126	0.041119	0.0572894	0.0318882	0.0311603	0.0715315	0.0612429
4619	A	0.048935	0.0329417	0.0295989	0.0297079	0.0331554	0.0283803	0.0308274	0.03605	0.0373229	0.0353338	0.03202	0.0213644	0.0457168	0.0177709
4621	A	0.0548103	0.0594192	0.045156	0.0761035	0.0374042	0.0222142	0.127973	0.135672	0.0761459	0.136941	0.0213095	0.034993	0.0869459	0.186466
4630	A	0.192381	0.211854	0.286046	0.142903	0.278331	0.0811127	0.162099	0.129732	0.136945	0.156014	0.110164	0.0674573	0.119973	0.0956687
4643	A	0.0930602	0.125696	0.0865939	0.123733	0.118307	0.0905315	0.060174	0.0750751	0.0679801	0.061559	0.0573786	0.0411645	0.0980736	0.0513627
4646	A	0.08044	0.101762	0.0937118	0.0844927	0.0322506	0.0540051	0.0583926	0.0460574	0.0672247	0.0562997	0.0249439	0.0116494	0.098476	0.0555193
4650	A	0.0706574	0.076632	0.105467	0.124158	0.0968072	0.0632051	0.0640137	0.0693029	0.0539126	0.0671388	0.030525	0.0437806	0.0966198	0.0363588
4651	A	0.0850454	0.0680195	0.10325	0.066074	0.0802149	0.0648203	0.0654013	0.0680234	0.0632417	0.0535411	0.0255221	0.0331293	0.0818678	0.0601065
4659	A	0.231898	0.228778	0.161923	0.264768	0.132769	0.100882	0.112779	0.0951029	0.0845633	0.110772	0.0866757	0.0748282	0.214661	0.0627911
4660	A	0.0850451	0.0820328	0.0918391	0.119307	0.101773	0.0660673	0.0803432	0.0621049	0.0935118	0.065785	0.0685219	0.0506736	0.0946665	0.0526039
4664	A	0.077616	0.0541055	0.0700603	0.0891751	0.0424286	0.0240332	0.0773694	0.0640776	0.0654324	0.0716866	0.0532109	0.0398317	0.0814909	0.0251577
4667	A	0.053563	0.0560999	0.0480817	0.0575244	0.0445841	0.0192439	0.0346885	0.0518207	0.0373654	0.0468577	0.0379448	0.00864484	0.0724438	0.0647389
4676	A	0.106139	0.111636	0.0487144	0.113971	0.0567289	0.0263514	0.0498819	0.0671008	0.0459598	0.0690916	0.0266319	0.0226823	0.0553435	0.0654755
4679	A	0.1034	0.0894745	0.0540588	0.0923031	0.042024	0.0217486	0.0366476	0.0520747	0.0433489	0.0705772	0.0373245	0.0278737	0.0436074	0.0409252
4682	A	0.123414	0.111457	0.0969567	0.114228	0.0355059	0.025061	0.0525855	0.0513733	0.0533098	0.0612897	0.0408195	0.0152814	0.0680846	0.040779
4686	A	0.0687035	0.0827254	0.0444762	0.0513247	0.0354519	0.0192801	0.0962804	0.0948409	0.0833213	0.0885359	0.0654855	0.109879	0.0341552	0.0740947
4687	A	0.0461377	0.0424655	0.0389199	0.0458837	0.0282167	0.0192753	0.075357	0.0641802	0.0761371	0.0729005	0.0492702	0.0665539	0.0442332	0.0553914
4695	A	0.0952394	0.0871731	0.0669577	0.112069	0.0110416	0.0133097	0.0361242	0.0598974	0.0401649	0.0576351	0.0336886	0.0444113	0.0482676	0.0331071
4696	A	0.0629556	0.0522421	0.04946	0.0631655	0.0151509	0.0118003	0.0637313	0.0488103	0.075365	0.0469249	0.0417087	0.0185114	0.0312248	0.051038
4700	A	0.0560255	0.0597505	0.0642029	0.0506412	0.0246033	0.0118027	0.0756641	0.0649224	0.0643152	0.0454839	0.0333427	0.0165166	0.0641941	0.0535419
4702	A	0.0796133	0.0934332	0.0827096	0.10471	0.0179948	0.0164927	0.0535641	0.0718679	0.0608345	0.0690185	0.0477777	0.0220109	0.0496251	0.0209023
4703	A	0.0624052	0.0655341	0.0704111	0.0751205	0.0124265	0.0194363	0.0380025	0.0511679	0.0416935	0.0408099	0.0177831	0.00732901	0.0547843	0.0486288
4712	A	0.122176	0.131093	0.138788	0.136635	0.083635	0.0734908	0.0509944	0.0803275	0.0821976	0.0685034	0.0847005	0.0680012	0.0629499	0.0745774
4718	A	0.117494	0.0905078	0.0947722	0.113058	0.0727186	0.0522048	0.0759223	0.0863591	0.0703165	0.0852413	0.0780237	0.0533341	0.0835688	0.0545076
4719	A	0.107928	0.0903506	0.0901548	0.0746374	0.0638077	0.0503606	0.08705	0.0682395	0.0634573	0.0597318	0.0489482	0.0286369	0.0923753	0.0639585
4722	A	0.0737674	0.0920481	0.126096	0.0837847	0.0545216	0.0729809	0.0426599	0.0667026	0.0432478	0.0667395	0.024135	0.0265894	0.0880202	0.0617995
4724	A	0.104071	0.120092	0.122209	0.101768	0.0718033	0.0532542	0.159335	0.145295	0.129886	0.143208	0.142912	0.117984	0.0996693	0.088956
4729	A	0.160386	0.187511	0.155443	0.179089	0.113255	0.131548	0.130543	0.122804	0.100392	0.137452	0.0935773	0.0829432	0.215307	0.126502
4739	A	0.0637787	0.0645649	0.0551505	0.0857576	0.0363477	0.0407965	0.0541411	0.0455996	0.0488298	0.0639236	0.0398719	0.0378165	0.0752823	0.0245649
4757	A	0.0697649	0.0574478	0.0643806	0.0659848	0.0433351	0.0435213	0.133623	0.122064	0.136983	0.11466	0.0636248	0.0630666	0.0669243	0.110959
4759	A	0.0477304	0.0667506	0.059543	0.0662402	0.0275502	0.0375776	0.0913954	0.103296	0.132862	0.102253	0.0926686	0.12307	0.0520239	0.12597
4805	A	0.168294	0.144791	0.114304	0.265526	0.0706542	0.105997	0.0973746	0.105177	0.10835	0.0647653	0.0645624	0.0636497	0.200197	0.0669576
4825	A	0.189737	0.180554	0.149607	0.248394	0.117351	0.111401	0.071517	0.0802367	0.0971721	0.0701421	0.0677644	0.0921007	0.1691	0.094181
4852	A	0.167868	0.196155	0.175395	0.320586	0.123609	0.10553	0.0856853	0.0603885	0.0545206	0.0980526	0.0636699	0.0729141	0.172265	0.0680623
4869	A	0.0915075	0.0895155	0.0887548	0.0874607	0.0433276	0.0395431	0.115236	0.107364	0.122489	0.0998457	0.100504	0.0771267	0.113117	0.120454
4887	A	0.114038	0.11255	0.0761107	0.10247	0.0443639	0.0463318	0.063145	0.0527076	0.0583684	0.0495808	0.0624555	0.0524853	0.107232	0.0394001
4888	A	0.106767	0.0696805	0.132569	0.107665	0.0571008	0.0513502	0.0714741	0.0821159	0.0934625	0.044338	0.0543894	0.0492089	0.0800179	0.0529113
4889	A	0.0752789	0.120561	0.0876175	0.103183	0.0422965	0.0513502	0.149893	0.17643	0.223542	0.115093	0.175196	0.126018	0.0917208	0.134645
4904	A	0.0882405	0.0754812	0.0641424	0.0471587	0.0347058	0.0222701	0.0836381	0.0695929	0.0774123	0.0822113	0.0294533	0.0516965	0.0532653	0.0585563
4905	A	0.105392	0.143384	0.151412	0.164726	0.0809506	0.103017	0.179553	0.205179	0.210536	0.175113	0.140035	0.243763	0.283627	0.137744
4906	A	0.122495	0.121898	0.142882	0.0905881	0.0790153	0.0926489	0.187234	0.214252	0.197052	0.169869	0.17397	0.26166	0.240433	0.180516
4929	A	0.102384	0.104648	0.123694	0.116961	0.0754138	0.0938579	0.0662575	0.0489842	0.0489441	0.0525617	0.034022	0.0580413	0.108342	0.038464
4933	A	0.149713	0.135261	0.11775	0.103053	0.0668747	0.0630363	0.0905749	0.0781963	0.0697341	0.0663775	0.0533201	0.0462931	0.173745	0.064275
4938	A	0.104746	0.121755	0.131131	0.126094	0.0977611	0.107236	0.0722717	0.0843964	0.0712394	0.0437481	0.0391144	0.0525218	0.188621	0.0498744
4950	A	0.143855	0.109618	0.0731177	0.126606	0.116732	0.0872402	0.120856	0.0860585	0.0918178	0.0773558	0.076716	0.0547414	0.106349	0.0559629
4951	A	0.11474	0.13022	0.132311	0.100757	0.106526	0.080547	0.0385166	0.0816635	0.0494589	0.0465694	0.0312931	0.0336633	0.0947786	0.0281706
4961	A	0.110292	0.0694664	0.103798	0.0962043	0.101951	0.0709766	0.0735835	0.0426585	0.0627011	0.0575871	0.044856	0.0470818	0.0613181	0.056331
4962	A	0.111597	0.127755	0.128974	0.132673	0.0949197	0.0838514	0.0656517	0.0483801	0.0737624	0.0817184	0.05849	0.0422193	0.0879121	0.0570342
4963	A	0.0350345	0.0727288	0.0696965	0.0680977	0.0436581	0.0350957	0.0497742	0.046708	0.0335768	0.0566451	0.0162981	0.0123531	0.0603197	0.027557
4966	A	0.0392985	0.0658388	0.056761	0.0591477	0.0382168	0.0460338	0.191141	0.145478	0.188359	0.146454	0.098371	0.102952	0.078405	0.169197
4972	A	0.108574	0.0703854	0.0760903	0.151251	0.0833979	0.0673768	0.2123	0.264943	0.209138	0.199967	0.184414	0.127028	0.0760028	0.0911462
4974	A	0.188724	0.195965	0.204946	0.245476	0.209424	0.160937	0.0977575	0.125096	0.100654	0.0856138	0.0711588	0.0642983	0.216837	0.073383
4977	A	0.248106	0.126734	0.166389	0.215776	0.183444	0.111966	0.0680209	0.0476091	0.049545	0.0509587	0.0459915	0.053273	0.203735	0.0389036
5002	A	0.115925	0.0875593	0.0587791	0.0697593	0.125689	0.102854	0.0996761	0.11981	0.1099	0.0621099	0.0986705	0.0857135	0.0756606	0.0746313
5006	A	0.173075	0.15932	0.121338	0.172429	0.0712904	0.109669	0.162928	0.133861	0.168227	0.15999	0.0894794	0.0642186	0.115705	0.090764
5009	A	0.211765	0.25183	0.116613	0.16172	0.0964423	0.106126	0.155067	0.173552	0.155606	0.14044	0.104626	0.177218	0.140764	0.105056
5011	A	0.256796	0.115207	0.136893	0.272301	0.171275	0.183381	0.123289	0.0899658	0.0911555	0.110803	0.0930121	0.0750065	0.22729	0.106455
5014	A	0.348396	0.153673	0.130039	0.17848	0.0990519	0.100138	0.123245	0.0818511	0.129563	0.0588281	0.0346555	0.0872805	0.178066	0.0843016
5029	A	0.0392619	0.0773894	0.0533404	0.0652955	0.0524567	0	0.0394964	0.0360604	0.0564493	0.0473569	0.0269639	0.0223654	0.0298359	0.0496672
5033	A	0.179063	0.162338	0.0989399	0.102705	0	0.0318421	0.0723514	0.0850742	0.0438693	0.112045	0.00934361	0.0228854	0.0924214	0.05639
5037	A	0.233202	0.0858001	0.269865	0.108578	0.217822	0.0854263	0.140708	0.113156	0.150773	0.208198	0.0819672	0.0283006	0.153846	0.0913242
5038	A	0.220426	0.187888	0.0909366	0.127971	0.180325	0.0690727	0.0489343	0.0988484	0.0680658	0.07857	0.0725935	0.0283675	0.154833	0.0269745
5039	A	0.452557	0.590232	0.280287	0.373274	0.533991	0.369069	0.0331547	0.0452125	0.0421053	0.0399867	0.00490653	0.0143089	0.360158	0.0273598
5043	A	0.35488	0.334879	0.2	0.252286	0.193498	0.169549	0.23874	0.174449	0.23304	0.190295	0.146918	0.0892857	0.292683	0.164394
5051	A	1.18694	1.47493	0.433526	1.05263	0.369004	1.47493	0.0757432	0.0801667	0.0317729	0.078637	0.0690727	0.064257	0.475059	0.0527241
5053	A	1.417	0.83682	0.193798	1.10803	0.25974	1.30112	0.0296912	0.024919	0.0644019	0.0853606	0.106073	0.0478126	0.612245	0.0536049
5055	A	0	0.444444	0	0	0.546448	0.389105	1.01789	1.30141	0.70458	1.38269	1.16247	0.94176	0.106496	0.749584
5056	A	0	0	0.211864	0	0.558659	0.207039	0.505689	0.613006	0.685284	0.967742	0.539313	0.850735	0.224719	0.700321

## Sheet: C>A
28s location	forward strand reference base	WT NaBH4 2-NH2-d-ATP HIV	75% WT NaBH4 2-NH2-d-ATP HIV	50% WT NaBH4 2-NH2-d-ATP HIV	25% WT NaBH4 2-NH2-d-ATP HIV	WT untreated 2-NH2-d-ATP HIV	WT untreated dNTPs HIV	WT NaBH4 d2-NH2-d-ATP SSIV	75% WT NaBH4 dNH2-ATP SSIV	50% WT NaBH4 2-NH2-d-ATP SSIV	25% WT NaBH4 2-NH2-d-ATP SSIV	WT untreated 2-NH2-d-ATP SSIV	WT untreated dNTPs SSIV	WT NaBH4 dNTPs HIV	WT NaBH4 dNTPs SSIV
1	c	4.85934	4.34783	5.25362	3.77551	3.84968	3.26015	6.16062	7.58886	11.8497	3.45865	11.4611	12.6309	3.37284	9.80551
3	C	6.0999	3.78788	4.7123	4.47598	4.16458	2.92398	7.09799	6.85714	2.62376	10.7021	5.41063	3.44275	2.54305	4.95908
6	C	0.483676	0.499616	0.389105	0.931532	0.48014	0.443787	0.425532	0.605013	0.202881	0.356379	0.285365	0.110538	0.436575	0.0438404
7	C	0.25184	0.50221	0.175631	0.338718	0.407283	0.091659	0.148655	0.236287	0.120983	0.305132	0.278595	0.175495	0.176386	0.197954
9	C	0.838238	0.887738	0.50844	1.17478	0.74989	1.0725	0.209479	0.205429	0.174764	0.258702	0.276091	0.184188	0.411479	0.178333
14	C	0.280025	0.391499	0.281501	0.448359	0.506679	0.567888	0.0458786	0.0619051	0.04939	0.0454236	0.0249792	0.0480346	0.382835	0.0674423
18	C	0.299283	0.496831	0.518299	0.58912	0.561592	1.17515	0.124008	0.112839	0.0848572	0.12374	0.139208	0.124492	0.633262	0.109081
23	C	0.258489	0.467022	0.477061	0.451402	0.348971	0.944072	0.150387	0.112351	0.128583	0.0810218	0.135089	0.105364	0.897361	0.104553
26	C	0.0389657	0.0722565	0.0415549	0.0729195	0.041834	0.100232	0.0280544	0.0285745	0.0356724	0.0228467	0.0120914	0.0132135	0.10394	0.0230691
27	C	0.0652351	0.0323206	0.0590646	0.107033	0.0368369	0.17284	0.0407803	0.0447751	0.0318987	0.0354578	0.0349352	0.03885	0.0653016	0.0499886
28	C	0.0614487	0.0305199	0.0593368	0.0631951	0.0427433	0.0485349	0.0745295	0.0525925	0.0981201	0.0490497	0.0949935	0.0208342	0.0688927	0.0265076
30	C	0.553797	0.473863	0.542969	0.4806	0.536367	0.473373	0.849693	0.913804	0.796184	0.743889	0.834707	0.766361	0.435173	0.74825
41	C	0.0389895	0.0346656	0.0173815	0.0285662	0.0313525	0.0514121	0.0331947	0.02178	0.0258257	0.024995	0.0133153	0.0202819	0.0540346	0.021355
50	C	0.0805288	0.0793407	0.0405852	0.0843211	0.0537562	0.135485	0.0504087	0.042066	0.0454521	0.0343187	0.0510944	0.0586444	0.143397	0.0594262
53	C	0.289306	0.267367	0.131312	0.5266	0.234732	0.197374	0.161573	0.149545	0.154184	0.189221	0.120819	0.13639	0.273551	0.182943
67	C	0.0918674	0.0934277	0.0791778	0.0823989	0.0866802	0.0724808	0.0381189	0.0327207	0.036362	0.0513077	0.0185531	0.0162166	0.0824531	0.0381181
71	C	0.0414079	0.0724589	0.0379329	0.0706328	0.0463926	0.0474077	0.0458403	0.045879	0.0476558	0.0557988	0.0424908	0.0177654	0.0743808	0.0307523
72	C	0.0550396	0.0511315	0.0535203	0.0677686	0.034846	0.0742779	0.0370953	0.036182	0.0273283	0.0390025	0.021696	0.025697	0.117849	0.0352237
79	C	0.0490993	0.0567817	0.0492382	0.0494071	0.0607141	0.0761319	0.0243755	0.0224738	0.0227604	0.039455	0.0343513	0.0208086	0.0953866	0.029051
80	C	0.0338232	0.0426315	0.0189817	0.0442702	0.0237959	0.0233143	0.0468833	0.0427829	0.034706	0.0455517	0.0273302	0.0284601	0.0434167	0.0468403
81	C	0.0382306	0.035846	0.0346386	0.0390199	0.0272722	0.0169231	0.0143035	0.0321248	0.0201947	0.0204196	0.0164369	0.0124432	0.0342629	0.0201675
83	C	0.0275526	0.0377136	0.029215	0.0330972	0.0451783	0.0530586	0.0363865	0.0299887	0.0264924	0.0243166	0.0317346	0.0137546	0.088603	0.0297659
89	C	0.102683	0.106191	0.136897	0.101642	0.137917	0.0905983	0.180891	0.223853	0.255211	0.155781	0.253446	0.327758	0.124667	0.179173
92	C	0.0378768	0.0519363	0.0525486	0.0801691	0.0417034	0.0380966	0.0359783	0.0455618	0.0578113	0.0382097	0.0322452	0.0366555	0.038854	0.044724
100	C	0.0797013	0.0698404	0.0701464	0.0964543	0.0821342	0.0512657	0.047979	0.0587123	0.067925	0.0465252	0.0478479	0.0400621	0.081156	0.0614242
110	C	0.0600042	0.061729	0.0602844	0.0601202	0.0581796	0.0244712	0.0923125	0.118752	0.112755	0.10644	0.0985509	0.0833601	0.0615583	0.128874
111	C	0.034088	0.0331562	0.022397	0.0447027	0.0306307	0.0117119	0.0448606	0.073186	0.0589025	0.0518695	0.0559677	0.0323503	0.0447559	0.053976
112	C	0.0250023	0.0324217	0.0292334	0.0358871	0.0166681	0.0141745	0.0236199	0.042891	0.0553115	0.047048	0.0448944	0.0229442	0.0373739	0.0340028
115	C	0.0409306	0.0385842	0.0475573	0.0621932	0.0286545	0.0224924	0.076784	0.0922917	0.113248	0.0596531	0.0725722	0.0540243	0.0813748	0.0674706
117	C	0.0569699	0.0662946	0.0518152	0.0593322	0.0591961	0.0304644	0.0890636	0.0961114	0.0800788	0.0839065	0.101937	0.0737347	0.0525762	0.060614
118	C	0.0284434	0.0241976	0.0227968	0.0304218	0.0216803	0.0278161	0.0256483	0.0317427	0.0283121	0.0411104	0.0199276	0.0175173	0.0527497	0.0348768
123	C	0.0323922	0.021095	0.0262959	0.0234791	0.0179576	0.0118476	0.0172278	0.0198164	0.0296853	0.0309793	0.0241861	0.0216203	0.0297254	0.0213749
124	C	0.023402	0.035655	0.0270791	0.0244469	0.0260095	0.0181636	0.0160337	0.0196597	0.0215183	0.0177523	0.0258361	0.0193801	0.0233057	0.0135062
125	C	0.0155963	0.0217274	0.017287	0.0183005	0.0194116	0.0224222	0.0203716	0.024012	0.0278516	0.0391566	0.0268377	0.0242698	0.0159407	0.0258584
126	C	0.00944806	0.0171948	0.0245399	0.0192929	0.0163138	0.0241711	0.031859	0.0281023	0.0285317	0.0424093	0.0227352	0.0251853	0.0375494	0.0242895
128	C	0.030666	0.0280002	0.0205528	0.0122974	0.028355	0.0254197	0.0438592	0.045794	0.0397557	0.0464645	0.0411854	0.0252759	0.0134997	0.0365988
129	C	0.0131105	0.0113499	0.0107625	0.0134854	0.0163411	0.0105305	0.041335	0.0356714	0.0224523	0.0259943	0.0284843	0.0166774	0.00367148	0.0174209
130	C	0.00961749	0.0157138	0.0150517	0.0159216	0.00906676	0.0104795	0.0134697	0.0148045	0.00975566	0.0185292	0.0102716	0.0115332	0.00853721	0.00645761
131	C	0.0125891	0.0189937	0.017795	0.0176389	0.0131325	0.0118288	0.0148448	0.0151222	0.00734653	0.0201374	0.00862995	0.0046794	0.0263079	0.0171343
133	C	0.0326027	0.0189166	0.0197578	0.0326656	0.0216819	0.0168545	0.0262942	0.028933	0.0184597	0.0211762	0.0162311	0.0128292	0.0260322	0.0250991
136	C	0.0217498	0.0221924	0.0213967	0.0265583	0.0121488	0.0138376	0.0332817	0.0328435	0.0321461	0.0338267	0.0255481	0.0242531	0.0199492	0.0367001
141	C	0.0314148	0.042852	0.028834	0.0613268	0.0308375	0.0326048	0.0591728	0.0559394	0.0455597	0.0366367	0.0483541	0.0234818	0.0362027	0.0354493
143	C	0.0265587	0.0398255	0.0407108	0.0437556	0.0287233	0.0173675	0.0416819	0.0370805	0.0363372	0.025023	0.0240183	0.0199497	0.0293984	0.0238786
148	C	0.0302146	0.0261066	0.0131417	0.0356271	0.0245329	0.0194508	0.0118717	0.0129735	0.00936242	0.0122047	0.00269527	0.00319207	0.0383994	0.0156969
155	C	0.0261946	0.0335105	0.0236457	0.0301542	0.02622	0.0171063	0.0217657	0.0143554	0.0184999	0.0299302	0.00347162	0.00612745	0.0285818	0.0334641
159	C	0.0274475	0.0200027	0.0313778	0.0269949	0.0108984	0.0225266	0.0396862	0.0336962	0.0473545	0.0334378	0.027203	0.020021	0.0500738	0.048604
166	C	0.0756469	0.0612105	0.0418704	0.0757077	0.0506084	0.041275	0.0630768	0.0598297	0.0686887	0.101203	0.0601782	0.0409871	0.0940395	0.0425454
167	C	0.0311701	0.028303	0.03055	0.0375099	0.0216643	0.017211	0.03917	0.042492	0.0202914	0.034909	0.0185107	0.035727	0.0548177	0.0320593
168	C	0.0808573	0.0742083	0.0598286	0.0722658	0.0706247	0.0673676	0.087984	0.0774467	0.0658418	0.0637383	0.0505116	0.0395866	0.137285	0.0517769
170	C	0.269812	0.214259	0.194501	0.254719	0.181968	0.150571	0.218615	0.217252	0.222397	0.200979	0.141974	0.110234	0.217307	0.163287
172	C	0.148196	0.156529	0.145254	0.164741	0.0817767	0.144775	0.0738765	0.0879445	0.092648	0.11101	0.0806282	0.0733925	0.192228	0.0938467
173	C	0.0756929	0.0532165	0.0840192	0.0548324	0.0644865	0.0637494	0.157746	0.154186	0.154899	0.123492	0.119858	0.12601	0.0777197	0.11081
174	C	0.0621585	0.0494111	0.0447488	0.0845971	0.0495771	0.0281522	0.0629244	0.0504923	0.0843966	0.0452069	0.0578861	0.0399624	0.091883	0.0439196
175	C	0.0515579	0.0557489	0.0455987	0.0712681	0.039032	0.0520382	0.0739144	0.081711	0.0847017	0.0820068	0.0525631	0.0548552	0.103222	0.0761537
178	C	0.10761	0.0908403	0.116387	0.148048	0.134126	0.104391	0.0574116	0.0569682	0.0501168	0.0493189	0.0538858	0.0473586	0.116524	0.0482506
180	C	0.068918	0.0723541	0.0801475	0.0952433	0.0525986	0.0424008	0.0215517	0.0145751	0.0210332	0.0179145	0.0153344	0.0145412	0.102577	0.0269695
181	C	0.039838	0.0239923	0.0371639	0.0405932	0.00604376	0.0444444	0.0294631	0.0190176	0.0274343	0.0206686	0.0112492	0.00970791	0.0666042	0.0241145
183	C	0.128934	0.095448	0.08865	0.0667594	0.0982486	0.076413	0.0942003	0.089578	0.129274	0.0495393	0.0688282	0.0700788	0.149399	0.0810455
185	C	0.0742284	0.095057	0.078329	0.0949832	0.0956371	0.0723496	0.150941	0.217236	0.182948	0.168656	0.155756	0.13553	0.15083	0.134264
194	C	0.0823962	0.0715758	0.0664129	0.0971945	0.0878101	0.030248	0.0535141	0.049067	0.0327115	0.0738577	0.0400812	0.0235261	0.0690405	0.0555257
195	C	0.0623575	0.0312149	0.0170428	0.0558688	0.0411656	0.0145152	0.0711009	0.101473	0.0973276	0.086928	0.0900375	0.106398	0.0312824	0.0827703
196	C	0.0374493	0.046169	0.030296	0.0370343	0.0357917	0.00936768	0.117856	0.1135	0.0923238	0.134478	0.0955554	0.101434	0.0501086	0.10059
201	C	0.0352671	0.0392428	0.023595	0.0468362	0.0180227	0.0175755	0.014931	0.0216564	0.0117922	0.0149616	0.00520379	0.0064433	0.0330235	0.00704585
202	C	0.0346047	0.0238226	0.0188964	0.020804	0.00983981	0.0172032	0.0200462	0.0267044	0.0106138	0.0213405	0.00642624	0.00318761	0.027217	0.0190813
205	C	0.0444505	0.0371147	0.0418684	0.041413	0.0317231	0.0132654	0.0268097	0.0229668	0.0414802	0.0377191	0.0395356	0.0592027	0.0471622	0.0281037
210	C	0.0858691	0.0897072	0.0583289	0.104271	0.064154	0.0721104	0.110799	0.195129	0.184031	0.108911	0.178171	0.170747	0.0548913	0.145146
215	C	0.0815841	0.0925679	0.0746603	0.0822487	0.0531559	0.0555932	0.140561	0.168725	0.151955	0.119084	0.0928021	0.0996409	0.049406	0.0975465
216	C	0.0863982	0.061031	0.049412	0.0758648	0.0697184	0.0448678	0.0999139	0.109675	0.122432	0.0800342	0.0842741	0.125401	0.0580747	0.104738
217	C	0.0539211	0.0420024	0.0342265	0.059174	0.045414	0.0256638	0.0637078	0.0540432	0.0491773	0.0368094	0.0312134	0.0325329	0.0437682	0.0354019
220	C	0.0710599	0.0585975	0.0485538	0.0542201	0.058471	0.0207168	0.0887457	0.0932587	0.0956965	0.0908852	0.0721682	0.0934891	0.0428119	0.0630546
221	C	0.0815419	0.0649906	0.0480151	0.0762315	0.0684746	0.043055	0.0805659	0.0850424	0.102747	0.0714017	0.0621138	0.0546221	0.0572068	0.0790459
222	C	0.0498873	0.0460767	0.0410193	0.0649075	0.0485332	0.0370803	0.0514651	0.0409219	0.0466576	0.0535417	0.0262222	0.0197208	0.0373922	0.0326052
228	C	0.0516319	0.0870857	0.0288155	0.0575069	0.0213782	0.0338826	0.086464	0.0939986	0.0987902	0.0489758	0.0879395	0.0894543	0.0761204	0.0727159
238	C	0.0738309	0.0576991	0.052407	0.0852224	0.0443178	0.0312541	0.0350095	0.0421488	0.0551278	0.0574664	0.0328871	0.0376942	0.039389	0.043522
239	C	0.0430955	0.0275786	0.0191461	0.0352707	0.0233332	0.016261	0.0420545	0.0342714	0.0582658	0.0484935	0.0441298	0.0454205	0.0303994	0.0377949
245	C	0.0402739	0.0405849	0.0270685	0.0438617	0.0429179	0.0296832	0.0625465	0.0562885	0.0533368	0.04461	0.0555556	0.0485248	0.0352654	0.0680632
248	C	0.0537454	0.054715	0.034889	0.0227798	0.0375542	0.0160352	0.013848	0.0341168	0.02979	0.0278701	0.0211894	0.0197897	0.0415442	0.0286227
249	C	0.054401	0.0425181	0.0491729	0.0578321	0.0323821	0.0395037	0.0392525	0.0299982	0.024351	0.0491149	0.0445427	0.0143304	0.0571633	0.0458353
250	C	0.0546964	0.0465724	0.026164	0.0466177	0.0339323	0.0248038	0.0617612	0.0513329	0.0620661	0.0473634	0.0463376	0.0308554	0.0613535	0.0203879
251	C	0.0351437	0.048678	0.0341451	0.0476652	0.0363779	0.0404648	0.0408087	0.0333076	0.0372464	0.0234783	0.0305956	0.0516008	0.0638867	0.0555935
252	C	0.0422208	0.0363154	0.0375531	0.0480931	0.0341591	0.0168724	0.0319172	0.0363769	0.0144532	0.0308684	0.0184369	0.0530137	0.0468197	0.0396707
255	C	0.046256	0.0571785	0.030698	0.0445309	0.0267677	0.0348599	0.0420242	0.0504714	0.0518395	0.0140865	0.0380123	0.0469451	0.0724759	0.0389034
257	C	0.0750354	0.0507391	0.056099	0.0870409	0.0435527	0.028404	0.0417355	0.0485854	0.0259516	0.0436563	0.0340106	0.0629753	0.0725344	0.0723085
259	C	0.105956	0.1222	0.097155	0.14601	0.0732139	0.0500896	0.0702468	0.0764044	0.0668543	0.056706	0.10399	0.0642166	0.117604	0.0866363
260	C	0.0607265	0.0465475	0.0229512	0.0769987	0.0334808	0.0332246	0.0607533	0.0589208	0.0577873	0.0543058	0.0510074	0.0517905	0.0921882	0.080745
264	C	0.0606177	0.0877294	0.0451081	0.134962	0.0251925	0.059405	0.0618371	0.101964	0.0661249	0.0507786	0.0494062	0.0694135	0.0873018	0.0689579
265	C	0.0708059	0.0832472	0.0388766	0.0823822	0.0505338	0.0447925	0.0276896	0.0227036	0.0425365	0.0312845	0.0270105	0.0220307	0.10007	0.0407753
266	C	0.0668259	0.0636344	0.0540119	0.10436	0.0428954	0.0338699	0.0351389	0.0341352	0.0129351	0.031763	0.0172527	0.0305962	0.112235	0.0598615
271	C	0.0493147	0.0435601	0.0246158	0.0487567	0.047187	0.0205569	0.0173886	0.0272899	0.0499993	0.0127243	0.0197987	0.00813736	0.0395012	0.0236049
274	C	0.104509	0.120727	0.148065	0.152474	0.117585	0.0799787	0.0554922	0.0625	0.026303	0.0639363	0.0312635	0.0417578	0.131698	0.0482382
275	C	0.0414884	0.0630939	0.0488138	0.0657501	0.0418682	0.036009	0.0554051	0.0359089	0.027619	0.0687503	0.0164442	0.0238873	0.0863782	0.0432319
276	C	0.0422254	0.0361164	0.0371502	0.0455541	0.0114848	0.0328192	0.0531491	0.0333016	0.0310279	0.0302928	0.0153574	0.0385865	0.0531763	0.0255061
282	C	0.0611729	0.050115	0.0317343	0.0678021	0.0346825	0.0311098	0.0630371	0.0405625	0.0424906	0.0554232	0.0152089	0.0278468	0.0546665	0.048975
289	C	0.0382829	0.0314993	0.0304739	0.0557512	0.026591	0.0140851	0.0237228	0.028512	0.020705	0.0252207	0.0128538	0.00875396	0.0343916	0.0211205
299	C	0.0538929	0.0568701	0.0346708	0.0628295	0.0344659	0.0157789	0.0437005	0.0473274	0.0518371	0.0416902	0.0415772	0.0295576	0.0357868	0.0302593
302	C	0.0348394	0.0412038	0.0415071	0.0522835	0.0168577	0.0132297	0.0445516	0.0161279	0.047002	0.0381031	0.0223908	0.0148388	0.0243977	0.0382842
303	C	0.0331813	0.0365082	0.0294967	0.0435932	0.0193584	0.0174306	0.0638686	0.0655711	0.0648212	0.078574	0.0657609	0.0313785	0.0280637	0.0362958
304	C	0.0565941	0.0605909	0.0529806	0.0691953	0.0549243	0.0444381	1.6302	1.74627	1.59924	1.80185	1.75745	0.564217	0.0546495	0.726077
309	C	0.0764669	0.0685161	0.0461927	0.0922921	0.0394414	0.0198569	0.0489975	0.0479386	0.0644093	0.0483028	0.0375565	0.0407387	0.0513157	0.0492256
320	C	0.0416683	0.0324886	0.034591	0.0332286	0.0314094	0.00953107	0.0334646	0.0254113	0.0180412	0.0334481	0.0113098	0.00675744	0.0328438	0.0273729
322	C	0.0792592	0.0614885	0.0667151	0.0867214	0.0589184	0.0485841	0.0750226	0.0443155	0.0389945	0.0571803	0.0399344	0.0497658	0.049474	0.0276568
323	C	0.0510717	0.0380081	0.0334397	0.0466884	0.0204915	0.0191208	0.0428249	0.0444642	0.0378304	0.020967	0.0171735	0.0189277	0.0452189	0.0277037
326	C	0.0483333	0.0554523	0.0462773	0.0566681	0.0494813	0.0373732	0.030607	0.0349732	0.0256853	0.0400397	0.0292772	0.0163922	0.0468281	0.0306665
332	C	0.0583908	0.0537201	0.039551	0.025867	0.0321423	0.0114655	0.0358792	0.0396445	0.0457016	0.0422661	0.0196801	0.0106678	0.0462075	0.0400529
339	C	0.0570477	0.0620091	0.0586602	0.0641955	0.0640297	0.0215838	0.136359	0.154562	0.156752	0.117501	0.137539	0.0888157	0.082252	0.0744437
340	C	0.200644	0.18914	0.351111	0.20972	0.30706	0.240082	0.179813	0.261992	0.281799	0.152124	0.219373	0.28439	0.312825	0.192136
343	C	0.13531	0.151996	0.164018	0.110968	0.195838	0.129529	0.198983	0.220177	0.241653	0.183965	0.23107	0.127684	0.0927773	0.13472
345	C	0.177323	0.188747	0.249683	0.201532	0.194288	0.156759	0.056052	0.0777054	0.0479315	0.0563236	0.0617284	0.0397624	0.145079	0.0393116
350	C	0.0504191	0.0498575	0.0488076	0.0588839	0.0514541	0.0347095	0.12312	0.114125	0.148233	0.108	0.136818	0.182255	0.0620165	0.0734525
351	C	0.0684304	0.0629878	0.0633045	0.0971832	0.0894814	0.06099	0.0746355	0.0684811	0.0636537	0.0721101	0.0644473	0.0944981	0.0738777	0.108125
358	C	0.0500854	0.0428403	0.0232332	0.0462024	0.0237316	0.0176585	0.0265223	0.0283731	0.0175486	0.0190247	0.0118631	0.0212264	0.0387459	0.0172269
361	C	0.0393046	0.0329245	0.017924	0.0280981	0.0163198	0.0177985	0.0426621	0.0219302	0.0322206	0.0416087	0.0161372	0.0215337	0.0404479	0.0369172
367	C	0.0427628	0.0280815	0.0242098	0.0444341	0.0313944	0.0192654	0.0283014	0.0234341	0.029985	0.0175279	0.0140624	0.0161525	0.0397599	0.0194062
368	C	0.0379688	0.0290326	0.0190506	0.0578205	0.0327927	0.0525457	0.0344444	0.0233073	0.0376128	0.0365172	0.0179698	0.0133865	0.0630713	0.0235435
390	C	0.0696395	0.0784134	0.0403024	0.0930383	0.0458058	0.0232165	0.0598102	0.0491213	0.0512577	0.0790196	0.0112509	0.0172533	0.0563656	0.0360185
406	C	0.377641	0.310171	0.199603	0.557988	0.367298	0.455166	0.178458	0.161391	0.150731	0.152598	0.299995	0.402478	0.319938	0.185604
414	C	0.211408	0.228449	0.203412	0.251814	0.203087	0.226677	0.199146	0.225968	0.232719	0.217703	0.226215	0.161869	0.214926	0.199231
421	C	0.0839989	0.0580608	0.0662441	0.0943743	0.0684577	0.0619401	0.0257785	0.0281839	0.0268758	0.0246007	0.0426826	0.0284066	0.0788874	0.0329544
422	C	0.0485161	0.0539309	0.0315198	0.0499922	0.0464161	0.0368508	0.0239243	0.0454609	0.0156541	0.0209838	0.0139716	0.0280323	0.0478323	0.0211168
436	C	0.0510648	0.0428949	0.0576893	0.0373013	0.0330235	0.0492153	0.0534122	0.0489883	0.0623748	0.0592078	0.0413845	0.075643	0.079477	0.0903317
446	C	0.0641956	0.0664305	0.0752402	0.0683911	0.0829876	0.0831574	0.154205	0.156515	0.16948	0.194192	0.102356	0.103209	0.082588	0.0909171
447	C	0.0953388	0.0646115	0.0598355	0.100912	0.0671325	0.0644726	0.130367	0.117035	0.10695	0.143569	0.125158	0.0868749	0.0958297	0.108914
449	C	0.079129	0.0508231	0.0643737	0.0672382	0.0667181	0.0696224	0.133388	0.134811	0.161482	0.0649098	0.0975927	0.0742065	0.110787	0.0733759
451	C	0.890396	0.725525	0.591603	0.28771	0.927992	1.06055	1.01389	0.852661	0.652471	0.349849	0.873192	0.942835	0.954155	0.86422
455	C	0.0729382	0.0833854	0.174011	0.0912655	0.100153	0.108235	0.0846234	0.092032	0.0780099	0.0598176	0.0612765	0.0265689	0.125336	0.0472575
456	C	0.0349278	0.0357392	0.0483259	0.02442	0.0275247	0.027768	0.0850981	0.106678	0.0745952	0.0488794	0.0310823	0.0262472	0.0628881	0.0764292
458	C	0.0481364	0.0703294	0.0788661	0.0740741	0.076865	0.0742066	0.128343	0.125605	0.088484	0.0831156	0.0352135	0.0571518	0.0804016	0.0715884
459	C	0.0531397	0.0518376	0.0393036	0.0622123	0.0455925	0.0756837	0.0951409	0.0971378	0.100454	0.121838	0.0554333	0.0699647	0.0791043	0.0503137
460	C	0.0761264	0.0690978	0.0918	0.0725735	0.0729589	0.069804	0.126469	0.147568	0.128991	0.156654	0.0773395	0.0574489	0.0926708	0.0945682
469	C	0.0304703	0.0224742	0.00898977	0.0146923	0.0160344	0.0182428	0.0354775	0.040869	0.04121	0.036829	0.0214844	0.0291246	0.0331078	0.0308703
472	C	0.0573374	0.0571775	0.0292766	0.0400666	0.0335354	0.0196873	0.135339	0.157226	0.100998	0.179993	0.0931819	0.0609979	0.0741993	0.137567
473	C	0.0406339	0.0390181	0.0325662	0.0439984	0.0256397	0.0220058	0.0957172	0.0752769	0.0625181	0.102689	0.0718928	0.0688788	0.0621762	0.0966129
474	C	0.0583173	0.0674707	0.0532277	0.0759141	0.023775	0.0398155	0.0717843	0.104006	0.0724861	0.0801849	0.05581	0.064431	0.0566572	0.100728
477	C	0.0665711	0.0620459	0.0599062	0.0667489	0.0467979	0.045106	0.110889	0.0947969	0.124635	0.147884	0.0705879	0.0641296	0.112082	0.139856
480	C	0.0282441	0.0354814	0.0255836	0.0352836	0.0203747	0.0232533	0.058973	0.0810692	0.101443	0.0387945	0.0617169	0.0539982	0.0322553	0.0660343
485	C	0.0372783	0.0395271	0.0335001	0.0311656	0.0354085	0.0330726	0.0417968	0.0449679	0.0483296	0.0237203	0.034017	0.0455373	0.0241196	0.0618393
486	C	0.00701988	0.0306932	0.0399956	0.00824861	0.0163167	0.0210364	0.0324261	0.0526283	0.0431047	0.0304101	0.022281	0.0236131	0.0321999	0.0461175
489	C	0.0137594	0.0168308	0.0199089	0.0263105	0.0313661	0.0207889	0.0813095	0.0645403	0.0981239	0.0698584	0.0343695	0.0450202	0.0358771	0.07724
490	C	0.01372	0.0134753	0.0200356	0.0161316	0.020277	0.0111646	0.0729488	0.102337	0.0556149	0.107648	0.0536761	0.0377819	0.0422235	0.106063
495	C	0.0303639	0.0334029	0.0289803	0.017801	0.0178228	0.0226084	0.0461923	0.0512705	0.0634609	0.0365974	0.0466053	0.075969	0.0376412	0.0282582
498	C	0.0273434	0.0187378	0.0389444	0.0299545	0.0358128	0.0309972	0.0982549	0.114955	0.120997	0.0769464	0.0821169	0.108329	0.0336608	0.0943288
501	C	0.0430986	0.0833197	0.0479168	0.0222763	0.0400288	0.0283067	0.0878882	0.11211	0.0944963	0.0796106	0.0838368	0.0867237	0.0439183	0.0751817
502	C	0.0312432	0.0401407	0.0271272	0.0382228	0.033092	0.0325088	0.0928122	0.0903788	0.0910443	0.0739927	0.0761954	0.075499	0.027614	0.0854253
503	C	0.016843	0.0221267	0.0134562	0.026812	0.0118318	0.0118156	0.0303398	0.0382717	0.0238621	0.0440975	0.0170309	0.0165374	0.0332258	0.0272576
506	C	0.0238849	0.0188558	0.00686295	0.0294301	0.0305034	0.0156375	0.00984931	0.0298306	0.0593165	0.00856183	0.0233543	0.0170107	0.0174354	0.0375074
511	C	0.021581	0.0296248	0.0269753	0.0196253	0.0139862	0.0163168	0.0261207	0.0386093	0.0465363	0.0414666	0.0320635	0.0515721	0.00810159	0.0272316
515	C	0.0270258	0.0321007	0.0411951	0.0225264	0.0155424	0.00734524	0.0619639	0.113799	0.102998	0.0504509	0.106793	0.0641236	0.0180234	0.0809844
516	C	0.0288443	0.022735	0.0222294	0.0210911	0.025007	0.0167967	0.0642886	0.0667662	0.0658297	0.0548373	0.0459409	0.0500594	0.0248901	0.0692373
517	C	0.0198765	0.0359918	0.0299162	0.024766	0.0157632	0.0168811	0.0492737	0.0513499	0.0704589	0.0320335	0.0341449	0.0496247	0.0187598	0.0133362
519	C	0.0672258	0.0704831	0.0422442	0.0777979	0.0676646	0.0213551	0.0934153	0.0932469	0.0604013	0.0646528	0.0567964	0.0431655	0.0282701	0.027887
520	C	0.0535045	0.0559108	0.0460405	0.0544478	0.0321647	0.0216165	0.0503778	0.0356985	0.0398426	0.049486	0.0187691	0.0435007	0.0351919	0.0224209
521	C	0.0411678	0.0517626	0.0281666	0.0381185	0.0195691	0.00839366	0.0173589	0.0348174	0.0430359	0.0254012	0.0263028	0.0221179	0.0293566	0.0230634
522	C	0.0414408	0.045015	0.0285396	0.047923	0.0288751	0.0234048	0.0364572	0.0192827	0.0322471	0.0275147	0.0179036	0.0202528	0.0388092	0.0170906
523	C	0.0166442	0.0253307	0.040156	0.0269521	0.0126841	0.0170834	0.036171	0.0402338	0.0353875	0.0227474	0.0226548	0.0218579	0.0275526	0.0169924
524	C	0.0317105	0.0308754	0.0201863	0.034751	0.0200499	0.0172128	0.035573	0.0123964	0.02317	0.0178915	0.0143637	0.0183199	0.0392465	0.0167781
528	C	0.0374455	0.121038	0.10399	0.20272	0.0377045	0.0359648	0.0405368	0.0716242	0.147936	0.154129	0.0445839	0.0557443	0.0479386	0.0199442
529	C	0.0394133	0.0956095	0.170567	0.263445	0.0227505	0.0294477	0.0255689	0.104901	0.201039	0.269786	0.0396347	0.0559441	0.0437552	0.0371248
531	C	0.0364875	0.0495021	0.0272843	0.0583795	0.0402099	0.0252699	0.059068	0.0891026	0.0951522	0.0474866	0.0773115	0.0795779	0.0421376	0.067359
532	C	0.0246106	0.0230783	0.0337175	0.0345599	0.0231871	0.00694444	0.041671	0.0817578	0.0614404	0.0670092	0.0556346	0.0618567	0.0375817	0.0661759
533	C	0.0165053	0.0243462	0.0167269	0.0336842	0.0318248	0.0198192	0.055634	0.033505	0.0579779	0.0297639	0.0491434	0.0302987	0.0525776	0.0366838
536	C	0.0729838	0.0642055	0.0518176	0.067223	0.07052	0.0141973	0.0357558	0.0371926	0.0522805	0.0286896	0.0415073	0.0377366	0.0458243	0.0320391
537	C	0.042343	0.0537346	0.0609699	0.0517852	0.0629515	0.0560835	0.0288781	0.00700574	0.042634	0.0466357	0.038838	0.0278208	0.063228	0.00619579
538	C	0.0499869	0.0545301	0.0623262	0.0634203	0.0745272	0.0544907	0.0301673	0.0472282	0.0382438	0.0201303	0.0267109	0.0137592	0.0673242	0.0361827
539	C	0.0818685	0.0911653	0.0879465	0.0865946	0.0762946	0.09838	0.0621008	0.098148	0.0947058	0.0821335	0.0590558	0.0659938	0.0924563	0.055515
541	C	0.170456	0.141724	0.228711	0.154226	0.0916435	0.0968263	0.0968468	0.110423	0.132606	0.0737608	0.11918	0.0972802	0.163916	0.0657816
542	C	0.170565	0.108912	0.0814642	0.133575	0.096615	0.0655117	0.0885096	0.0915591	0.0722365	0.0770225	0.0800961	0.0549753	0.117137	0.0748839
544	C	0.0886132	0.074675	0.146284	0.163268	0.0583942	0.0543478	0.0854701	0.0923057	0.0873041	0.0509204	0.074734	0.0482544	0.0926238	0.0547379
545	C	0.102971	0.0717978	0.0924328	0.132047	0.0763738	0.0651333	0.0678887	0.0908648	0.0690444	0.0566996	0.0602506	0.0904081	0.102473	0.110681
546	C	0.129697	0.0598287	0.116414	0.14021	0.109796	0.076032	0.0875305	0.0691748	0.0703249	0.062315	0.0617208	0.0624874	0.103901	0.0312256
548	C	0.102026	0.117266	0.148242	0.195974	0.142115	0.0889812	0.125063	0.119671	0.193762	0.0584252	0.190759	0.198518	0.174287	0.0958405
549	C	0.100803	0.0330633	0.0943054	0.100959	0.0406945	0.0301054	0.0595054	0.0603433	0.0964815	0.060646	0.0947289	0.107862	0.151381	0.0189382
550	C	0.087396	0.0696955	0.107502	0.125381	0.0988235	0.109838	0.0573449	0.0513611	0.0848492	0.0344992	0.0804727	0.0998027	0.115728	0.0506762
552	C	0.112238	0.111057	0.09375	0.173184	0.114684	0.149119	0.0191575	0.0537346	0.0602422	0.0613203	0.0683191	0.0792485	0.145114	0.0347947
553	C	0.055253	0.0181373	0.040404	0.0557232	0.0446561	0.0389213	0.0382446	0.033524	0.0687901	0.0506289	0.0511934	0.0303066	0.132108	0.0158213
554	C	0.0558592	0.0503801	0.0163145	0.0516942	0.0601112	0.0279783	0.132247	0.127908	0.282568	0.113711	0.229083	0.222748	0.0695491	0.138906
557	C	0.160614	0.194165	0.111441	0.23062	0.134228	0.128796	0.135573	0.132577	0.242924	0.155104	0.166173	0.200178	0.16756	0.102344
558	C	0.414126	0.368927	0.339335	0.433991	0.278915	0.261834	0.262759	0.211751	0.261868	0.247602	0.249887	0.350189	0.379153	0.206577
559	C	0.30581	0.289112	0.205459	0.230661	0.192284	0.227189	0.145769	0.123922	0.108364	0.116019	0.115489	0.154107	0.223115	0.102789
560	C	0.165503	0.0997243	0.0416884	0.11645	0.0595593	0.226793	0.0681163	0.0547697	0.0969305	0.080662	0.0903573	0.118474	0.13723	0.0804027
561	C	0.244217	0.234742	0.174281	0.30096	0.143289	0.276823	0.138596	0.144248	0.196547	0.156495	0.182464	0.261801	0.412371	0.134399
563	C	0.465035	0.266324	0.236651	0.384615	0.34817	0.33723	0.0702938	0.0958362	0.115869	0.0809795	0.102541	0.108665	0.522987	0.0993524
564	C	0.358387	0.26574	0.360478	0.411426	0.196952	0.334655	0.143184	0.0897965	0.139107	0.0790957	0.0940184	0.122052	0.409025	0.0706188
566	C	0.277251	0.226212	0.172563	0.449983	0.211612	0.146389	0.0580791	0.0622446	0.0546254	0.0321543	0.0561888	0.042217	0.254367	0.0829384
567	C	0.227964	0.205218	0.131955	0.470248	0.10874	0.151643	0.0242711	0.0483209	0.0353434	0.0425607	0.0372906	0.0271027	0.311419	0.0314379
568	C	0.160282	0.183964	0.223864	0.171723	0.0836587	0.156495	0.0333111	0.0456082	0.0299287	0.0141759	0.0427122	0.0483764	0.249822	0.0235729
569	C	0.119822	0.128576	0.253866	0.303092	0.200114	0.179179	0.0296419	0.0368353	0.0458617	0.0520634	0.0607742	0.0601974	0.145059	0.0347974
571	C	0.222447	0.0717231	0.145808	0.207996	0.137868	0.1443	0.0360263	0.0186677	0.0466841	0.0245588	0.0622463	0.021925	0.258295	0.0157295
572	C	0.0789422	0.0348129	0.022779	0.1566	0.0597818	0.061627	0.0413467	0.0340635	0.0272116	0.0241105	0.0213709	0.0405073	0.115009	0.0311115
574	C	0.147866	0.110538	0.0708717	0.288115	0.172684	0.129534	0.0210223	0.0238911	0.0193745	0.0316612	0.0190679	0.028732	0.298626	0.0317725
575	C	0.070855	0.0631845	0	0.0825991	0.104221	0.0464468	0.0275095	0.0188827	0.0283551	0.0286266	0.0278886	0.0163143	0.145138	0.0121021
577	C	0	0.0548546	0.0613121	0.240055	0.203069	0.26688	0.0223378	0.0254008	0.0336319	0.0413068	0.029509	0.0386317	0.155176	0.0211291
578	C	0.0621697	0.0272926	0.0306091	0.0689417	0.0450248	0	0.0256427	0.0255297	0.0402926	0.0150886	0.0387551	0.0427731	0.0880088	0.0340686
580	C	0.191327	0	0.154512	0.104749	0.115607	0.0540394	0.0457382	0.0666261	0.0352011	0.0463965	0.0214146	0.047921	0.0666371	0.0566424
581	C	0.0963391	0.140331	0.0310366	0.0352113	0.0700117	0.0813008	0.0591308	0.0613551	0.0489508	0.0739645	0.0403338	0.0377558	0.133067	0.0839965
582	C	0.160102	0.140135	0	0.0352983	0.117069	0.0806452	0.0940702	0.0959635	0.0645841	0.0713634	0.0962526	0.0549235	0.198369	0.0317115
583	C	0.19305	0.250906	0.276668	0.17618	0.0701919	0.18617	0.162442	0.123946	0.127437	0.144613	0.112812	0.200393	0.153005	0.109305
592	C	0.281834	0.233645	0.128866	0.545256	0.314527	0.517799	0.171349	0.242827	0.200422	0.183173	0.193996	0.250809	0.297841	0.14742
596	C	0.630989	0.345946	0.272075	0.572852	0.278087	0.402414	0.153281	0.192049	0.2802	0.202245	0.235067	0.207081	0.333567	0.0982125
598	C	0.223305	0.284792	0.221043	0.304745	0.162549	0.329804	0.130762	0.153	0.207907	0.112047	0.107957	0.175582	0.360332	0.147283
599	C	0.127273	0.376906	0.323037	0.388425	0.25059	0.217459	0.205167	0.332442	0.430556	0.211234	0.397705	0.676569	0.318794	0.311542
602	C	0.141532	0.285328	0.146951	0.183028	0.130685	0.281452	0.172815	0.218517	0.239911	0.113833	0.238257	0.167712	0.343234	0.157566
608	C	0.388457	0.579615	0.734024	0.407261	0.630882	0.674157	0.339982	0.416555	0.599499	0.363907	0.511567	0.598549	0.621245	0.322969
618	C	0.320947	0.344803	0.412309	0.52352	0.326531	0.485661	1.12454	1.51092	1.20671	1.10574	1.33447	1.66907	0.553975	0.89046
622	C	0.205447	0.226217	0.213639	0.292863	0.208439	0.265664	0.412681	0.387946	0.403799	0.372172	0.435153	0.597348	0.320928	0.415343
627	C	0.259815	0.288565	0.280899	0.374863	0.293662	0.22167	0.300546	0.246564	0.233551	0.309189	0.346603	0.321477	0.347417	0.307989
628	C	0.121529	0.215646	0.190114	0.223888	0.191166	0.211832	0.096913	0.112902	0.088225	0.0817972	0.102781	0.142127	0.295013	0.0757548
640	C	0.126819	0.172968	0.0920669	0.216006	0.0741316	0.102768	0.119592	0.0741381	0.09242	0.102369	0.106621	0.199435	0.289907	0.0764548
643	C	0.105662	0.0834312	0.0788022	0.0951626	0.0226098	0.0581283	0.0603029	0.0480615	0.0605061	0.0414708	0.0590101	0.0599754	0.143614	0.0786959
650	C	0.0750488	0.026434	0.0678616	0.0792588	0.0358532	0.029656	0.035953	0.0384445	0.0201616	0.0281477	0.0140475	0.0168216	0.0533789	0.0256812
651	C	0.0357859	0.0201562	0.0418028	0.0367734	0.0131213	0.0256056	0.0432499	0.0300611	0.0227169	0.0253678	0.0235702	0.00602355	0.0277309	0.0275379
654	C	0.0184719	0.0145127	0.0213728	0.0384389	0.0339946	0.0191676	0.0400416	0.0475755	0.0531811	0.0332557	0.0519339	0.0549589	0.0268666	0.032121
655	C	0.0244032	0.0185348	0.0102817	0.0271645	0.023515	0.02296	0.0178278	0.0307587	0.0388954	0.0246422	0.0258184	0.0205773	0.0139263	0.0267764
656	C	0.0213002	0.0220337	0.0127726	0.0166698	0.0173156	0.0149187	0.0153257	0.0175319	0.0190414	0.0179497	0.0146113	0.0301309	0.00664643	0.0165547
657	C	0.0125481	0.0215745	0.00620097	0.0257412	0.0334546	0.0164989	0.00946719	0.0121389	0.0270493	0.0118577	0.0118829	0.0114046	0.0347856	0.0187776
658	C	0.0102145	0.0231633	0.0243139	0.0297428	0.0061689	0.00802907	0.0151449	0.0243081	0.0122442	0.0177186	0.0212695	0.0228421	0.0230236	0.0116975
661	C	0.0221564	0.0246624	0.0235135	0.0408247	0.0171438	0.00927334	0.0469378	0.0482218	0.0508256	0.025411	0.0516365	0.0597423	0.020552	0.032503
662	C	0.011646	0.0472683	0.0194013	0.0263997	0.0156582	0.0188121	0.0634276	0.0848614	0.0791681	0.0641897	0.0755055	0.0908403	0.0277343	0.051754
665	C	0.014828	0.0410685	0.0180986	0.0148311	0.0174009	0.0140852	0.015753	0.025655	0.0457498	0.0127672	0.0420428	0.030439	0.0191026	0.0282136
668	C	0.0397449	0.0400252	0.0208872	0.054197	0.0157218	0.014039	0.0285246	0.0393365	0.0447318	0.026016	0.0420892	0.0370381	0.0234187	0.0312214
669	C	0.0285682	0.0345092	0.0445609	0.0261427	0.0141918	0.00312544	0.0124929	0.0346477	0.0302368	0.0242977	0.0321854	0.0276171	0.0195733	0.031287
672	C	0.039601	0.0244724	0.0202855	0.0411166	0.0313316	0.0164383	0.0322116	0.0421408	0.0696589	0.0447563	0.0589789	0.0737366	0.0308404	0.0508744
673	C	0.0663369	0.0642443	0.0912918	0.0390693	0.12514	0.0670821	0.0834952	0.141423	0.185827	0.0755627	0.161481	0.208516	0.0617332	0.140282
675	C	0.0207535	0.0355645	0.0225152	0.0151745	0.0233932	0.0191061	0.0337701	0.0281356	0.0383405	0.0376203	0.0184968	0.0370414	0.0306684	0.0231365
676	C	0.0131869	0.0242442	0.00995793	0.0195012	0.0145266	0.0161009	0.0473653	0.0845282	0.0621085	0.0808771	0.0948533	0.106871	0.024898	0.0632005
678	C	0.0358761	0.0204704	0.0271317	0.0392063	0.0257983	0.0245208	0.0548471	0.0616016	0.066624	0.0274093	0.0595733	0.0860654	0.0384165	0.0512437
679	C	0.0264445	0.0278836	0.0122814	0.0305184	0.0371047	0.0229849	0.032497	0.0393131	0.035745	0.034721	0.0481571	0.0540719	0.0287936	0.0511902
683	C	0.0220438	0.0246761	0.0248122	0.0255842	0.0217642	0.0144501	0.016472	0.0165503	0.0174923	0.0142369	0.0140448	0.0213517	0.0243377	0.00414912
685	C	0.02536	0.0276081	0.0371739	0.0253405	0.0297085	0.0128366	0.0279868	0.0240627	0.00878514	0.0410509	0.0105581	0.0189065	0.048276	0.0291478
690	C	0.041918	0.0377546	0.0191673	0.0259174	0.0297166	0.00993999	0.0491924	0.0538101	0.084719	0.0269353	0.0481012	0.0150459	0.0319261	0.0290523
691	C	0.0657847	0.0669723	0.0617915	0.0476944	0.066673	0.0174296	0.0411435	0.035975	0.0381505	0.0342293	0.0353957	0.0201872	0.0451663	0.0333688
693	C	0.0160202	0.0331829	0.0208199	0.0233521	0.0165153	0.0147569	0.110243	0.129844	0.112601	0.0969347	0.0789626	0.0526809	0.0253665	0.0494448
694	C	0.0104847	0.0146158	0.0183105	0.0208398	0.0244226	0.0157395	0.122638	0.104872	0.115674	0.110061	0.112348	0.108043	0.0302523	0.0789627
696	C	0.0224949	0.0192471	0.0180325	0.0206847	0.02968	0.0143427	0.0250325	0.0168914	0.0233902	0.0236596	0.0163553	0.0356313	0.0141166	0.0164948
699	C	0.0212672	0.0151194	0.0115351	0.0218306	0.0236595	0.0148753	0.0456974	0.0423407	0.0228295	0.0225175	0.0278481	0.0361752	0.0154009	0.0256927
704	C	0.0201164	0.0285694	0.0206054	0.0116811	0.0297271	0.017751	0.0468207	0.046092	0.0522844	0.0319526	0.0426955	0.0387007	0.0325226	0.023154
706	C	0.0155892	0.0129662	0.0283254	0.0275927	0.0308394	0.0222556	0.0480834	0.0613044	0.0958377	0.0452633	0.0507896	0.0592295	0.0242449	0.0289575
707	C	0.017154	0.0129713	0.0169808	0.0118437	0.0205177	0.0200009	0.0325232	0.0328353	0.0775996	0.018165	0.0416272	0.0494359	0.0173349	0.0246647
709	C	0.0156691	0.0289859	0.0361025	0.0337523	0.047589	0.0235157	0.0208123	0.0151014	0.0297284	0.0233054	0.0289811	0.024158	0.0314268	0.0133987
712	C	0.0368029	0.0398913	0.0501369	0.0304007	0.0470889	0.0349564	0.041796	0.0424181	0.0528887	0.0234974	0.0419977	0.03352	0.0513693	0.0400763
713	C	0.0308432	0.0300372	0.02367	0.039044	0.0139042	0.0194938	0.0290934	0.0280383	0.0268494	0.0205694	0.0264766	0.0251067	0.0376972	0.0272538
716	C	0.035644	0.0441745	0.0562301	0.0603045	0.0391263	0.0299218	0.0769146	0.0747041	0.109163	0.0477352	0.0796289	0.0649756	0.0375087	0.073471
718	C	0.0553509	0.0996112	0.109693	0.087779	0.103626	0.110782	0.100514	0.123489	0.124151	0.099087	0.137444	0.110224	0.114519	0.1154
719	C	0.0671696	0.0768	0.0879987	0.0850915	0.0670204	0.0945655	0.110076	0.10485	0.118913	0.0962582	0.124462	0.152218	0.0996859	0.135098
724	C	0.0733923	0.0597924	0.0518269	0.102234	0.0666436	0.0403102	0.0474368	0.063138	0.0741603	0.0429417	0.0512934	0.0849883	0.0996636	0.0702755
727	C	0.109886	0.0881601	0.0822087	0.12045	0.0891422	0.0730184	0.0599104	0.0938737	0.112546	0.0777071	0.102034	0.0855303	0.111901	0.0887889
736	C	0.107008	0.0801764	0.0867266	0.0878812	0.067239	0.0532873	0.138485	0.148734	0.143827	0.124867	0.12196	0.112061	0.0777071	0.114864
737	C	0.0511446	0.0454361	0.0606159	0.0658664	0.053127	0.0548172	0.0855824	0.0946838	0.11513	0.0801168	0.0989986	0.104299	0.0489416	0.0899625
738	C	0.0926079	0.0739578	0.066089	0.0992871	0.0805639	0.0959382	0.162438	0.165276	0.204953	0.124055	0.186731	0.16375	0.0875975	0.138217
741	C	0.0711341	0.075541	0.0584785	0.0594701	0.0641935	0.0521282	0.103104	0.101348	0.123552	0.111529	0.115489	0.125391	0.0763905	0.109937
753	C	0.0873763	0.0933176	0.109771	0.144765	0.0916466	0.0365599	0.347242	0.346268	0.181638	0.327554	0.192486	0.166046	0.120912	0.298612
755	C	0.1419	0.131216	0.0783513	0.140261	0.0990277	0.116858	0.235626	0.222007	0.184458	0.202147	0.179962	0.210455	0.14954	0.226472
762	C	0.126867	0.0716433	0.0497477	0.10726	0.0767591	0.037594	0.0385305	0.0569552	0.038834	0.0628997	0.0312934	0.0222129	0.087528	0.0401951
763	C	0.0721218	0.0357511	0.0321036	0.0807996	0.0326986	0.0290329	0.0593455	0.0648408	0.0305707	0.0513804	0.0321659	0.0248968	0.0617761	0.0376634
764	C	0.0359296	0.0411162	0.0250668	0.0367814	0.0242578	0.0190955	0.040751	0.0260498	0.0330373	0.0429856	0.0337968	0.0197086	0.0533693	0.0488555
765	C	0.0463765	0.0217353	0.0318203	0.0556415	0.0183019	0.0189242	0.030198	0.0322518	0.0296232	0.0510247	0.0257883	0.0098108	0.0417531	0.0466058
768	C	0.0211695	0.0266859	0.013659	0.0238716	0.0181442	0.00670052	0.023174	0.0377329	0.0356506	0.0239079	0.0252529	0.0205703	0.0247515	0.023685
769	C	0.0149873	0.0264743	0.0230881	0.0219992	0.0073888	0.0125552	0.0172921	0.033729	0.0226919	0.0322121	0.0213351	0.014489	0.0163849	0.012698
772	C	0.0338111	0.022181	0.0229482	0.0283503	0.0138901	0.00804906	0.0378176	0.0380513	0.0198088	0.0221284	0.0265643	0.0163537	0.0122656	0.0220889
773	C	0.0306105	0.0116635	0.0134432	0.00827513	0.0138269	0.0108997	0.0606884	0.0470594	0.0544869	0.0422669	0.0290292	0.0265453	0.0379883	0.0365892
776	C	0.0315598	0.0243209	0.0200088	0.017948	0.0210157	0.0100905	0.0348589	0.0355343	0.0400805	0.0236714	0.0213419	0.022374	0.0217309	0.0185467
777	C	0.0229239	0.0204774	0.0187253	0.0326488	0.00810649	0.010033	0.058029	0.0474127	0.0435898	0.0337467	0.0404307	0.0376835	0.0190349	0.0331382
780	C	0.0299452	0.0191647	0.018819	0.0341969	0.0106534	0.0159165	0.0476438	0.0591537	0.0279004	0.0417084	0.0380682	0.0116151	0.0303444	0.0185161
781	C	0.0372637	0.0231071	0.0202563	0.0541188	0.0123576	0.0137651	0.087999	0.0776214	0.0381819	0.101565	0.0348951	0.0258784	0.0320036	0.0258069
784	C	0.0377561	0.0338661	0.0247195	0.0317105	0.0259969	0.0169129	0.0648396	0.0697763	0.0377058	0.061308	0.045306	0.0240352	0.0283624	0.0406324
785	C	0.016138	0.0144907	0.0110972	0.0304868	0.0279789	0.0103761	0.0742581	0.0691942	0.0419938	0.0949326	0.0430357	0.0382912	0.0388305	0.0367161
787	C	0.0448705	0.0281936	0.0226286	0.0759957	0.0492479	0.0188949	0.115284	0.113802	0.0770497	0.155158	0.0804331	0.0419647	0.0521167	0.0692119
788	C	0.0242025	0.0204104	0.0201392	0.0314801	0.0245899	0.0206813	0.0612405	0.0746542	0.0439769	0.113707	0.0475611	0.0232634	0.0256701	0.0277644
790	C	0.0572637	0.0429289	0.0334022	0.0925138	0.0472498	0.0281396	0.119481	0.120144	0.0877078	0.170872	0.0774388	0.0521053	0.0935167	0.0881972
791	C	0.0271505	0.0287464	0.0152901	0.0614228	0.0242589	0.0194065	0.10109	0.109655	0.0628559	0.120005	0.0830971	0.0553003	0.0487029	0.0698405
793	C	0.0601734	0.0686914	0.0418988	0.108373	0.038922	0.036881	0.0982794	0.113796	0.0775974	0.116724	0.0760824	0.0602902	0.0730472	0.0620757
794	C	0.0474725	0.0441683	0.0312965	0.047901	0.0267896	0.0230935	0.119661	0.140228	0.0792196	0.122618	0.0958574	0.0635318	0.0804316	0.0696338
795	C	0.11158	0.0763975	0.0475067	0.10305	0.0356336	0.0430422	0.169494	0.156047	0.137054	0.162606	0.125989	0.121393	0.12869	0.11539
796	C	0.0640531	0.0474355	0.0537065	0.0945143	0.0395921	0.0391676	0.134947	0.158692	0.159013	0.131526	0.12819	0.0664018	0.064726	0.111996
797	C	0.0574613	0.033231	0.0339714	0.0712642	0.0228766	0.0205942	0.0549582	0.0896558	0.0857727	0.072724	0.0797247	0.0560914	0.0870875	0.062376
800	C	0.0489994	0.0485018	0.023411	0.0757332	0.0336704	0.0174975	0.0743527	0.0605579	0.0706358	0.0723433	0.0770441	0.0389648	0.0474109	0.0702318
802	C	0.0501086	0.0405476	0.0549927	0.0421962	0.0377904	0.0345185	0.112253	0.0932332	0.0794029	0.105935	0.0874235	0.0670745	0.0658025	0.108656
803	C	0.0383476	0.0415875	0.0218041	0.0714742	0.0322724	0.042322	0.142428	0.148158	0.13117	0.111047	0.124997	0.148496	0.0584506	0.104312
805	C	0.0870594	0.0499813	0.0276498	0.120091	0.0499401	0.0388053	0.104923	0.110287	0.0948935	0.125923	0.1045	0.109025	0.175405	0.125061
806	C	0.0293785	0.0211649	0.0351873	0.0529277	0.0261472	0.0357055	0.0541221	0.0685063	0.0950059	0.0463414	0.077564	0.103856	0.06244	0.0850461
807	C	0.0205907	0.0214703	0.0190685	0.0593707	0.0369129	0.0274825	0.0482301	0.0588985	0.0752996	0.0415692	0.0947604	0.0851934	0.0750933	0.0564528
808	C	0.032445	0.0262312	0.0535501	0.0486688	0.0256024	0.0269258	0.0600668	0.0746699	0.0989334	0.049736	0.0983671	0.0984222	0.0758169	0.0944537
809	C	0.0494157	0.0351346	0.0863174	0.0720677	0.0518546	0.039558	0.0590236	0.0858925	0.0969942	0.0683239	0.117617	0.1226	0.0676784	0.076978
810	C	0.0150493	0.00952857	0.0586276	0.0335417	0.0396832	0.0261831	0.054178	0.0732285	0.0988392	0.0415663	0.107387	0.0987135	0.0865052	0.0758669
813	C	0.0191595	0.0406161	0.0213622	0.0532481	0.0468509	0.0248271	0.0313433	0.0310809	0.0688133	0.0485813	0.0753829	0.0933434	0.0460496	0.0355436
814	C	0.0164614	0.0291649	0.00742694	0.0196959	0.0279929	0.0273518	0.0311762	0.0479163	0.0750957	0.0331191	0.095816	0.105296	0.0234278	0.0423582
815	C	0.0330299	0.0184094	0.0343318	0.0221857	0.0378082	0.0530591	0.0360268	0.0372407	0.10956	0.0334326	0.109536	0.171541	0.0624472	0.0576103
816	C	0.019036	0.042629	0.0551116	0.0325809	0.0488113	0.051091	0.038273	0.0493834	0.128287	0.0371091	0.136679	0.222299	0.0336978	0.0897733
818	C	0.00414989	0.0172592	0.0260078	0.020734	0.0129091	0.0117401	0.00448591	0.0172881	0.0296797	0.0180688	0.0284819	0.0411344	0.00816693	0.0189649
821	C	0.0186541	0.00495099	0.00610314	0.0235738	0.00750525	0.0187141	0.0077044	0.017867	0.0151626	0.0092487	0.0252516	0.0233258	0.0182632	0.0193218
822	C	0.00962742	0.00511326	0.0315457	0.0362538	0.00777907	0.0140233	0.00466034	0.0120066	0.00697418	0.00929469	0.0182862	0.0165637	0.00470323	0.0135321
824	C	0.0154337	0.0165098	0.00677966	0.0321295	0.0417973	0.00597372	0.0174648	0.0168826	0.0159455	0.0236403	0.0209129	0.0171367	0.0049554	0.0195791
825	C	0.0107204	0.0172206	0.0212254	0.039968	0.0130543	0.0187846	0.0258231	0.0140379	0.00886564	0.00958114	0.0291642	0.0225473	0.0103013	0.0158567
826	C	0.0282709	0.042268	0.0298753	0.0416956	0.036785	0.0237071	0.0307672	0.0109615	0.0208374	0.0272453	0.0274866	0.038045	0.0107991	0.0138837
828	C	0.134629	0.156504	0.140395	0.251437	0.199734	0.242139	0.221722	0.252956	0.345526	0.178888	0.387997	0.946206	0.430002	0.373303
836	C	0.0999308	0.163159	0.199342	0.209243	0.138446	0.139509	0.0709094	0.0693791	0.0717512	0.0981798	0.0854686	0.109358	0.118017	0.0347329
838	C	0.18885	0.235623	0.165051	0.274413	0.138548	0.0860542	0.0690874	0.11103	0.0829481	0.0814783	0.121967	0.115293	0.143003	0.059015
840	C	0.0943767	0.173525	0.0674504	0.208484	0.0718821	0.124283	0.0469015	0.0541951	0.0644455	0.0501645	0.0738752	0.0783904	0.0971943	0.0660785
845	C	0.142827	0.132324	0.139952	0.150579	0.0832293	0.066564	0.0614008	0.0269898	0.0408743	0.0491479	0.0330211	0.0315704	0.113766	0.0389969
850	C	0.172922	0.162813	0.0569071	0.216935	0.0897545	0.105667	0.0779856	0.0799746	0.0641026	0.0983125	0.0798516	0.0521976	0.149321	0.0642543
853	C	0.0541506	0.0898321	0.100724	0.113943	0.0894141	0.0683385	0.0721002	0.0543855	0.0603815	0.0562065	0.0474132	0.0682472	0.0915432	0.0425365
856	C	0.328094	0.254158	0.246274	0.110139	0.314221	0.248734	0.18283	0.144785	0.0988258	0.0805765	0.178718	0.168169	0.302729	0.142639
859	C	0.0508107	0.0877236	0.0396646	0.0770812	0.0415887	0.050862	0.0636026	0.0307615	0.0311608	0.0352708	0.0570651	0.0474005	0.0846638	0.051129
862	C	0.197481	0.170656	0.122614	0.15993	0.209891	0.175096	0.194657	0.147181	0.115221	0.0970314	0.170905	0.166474	0.219146	0.211878
865	C	0.0787859	0.0562795	0.0496771	0.0725854	0.0399006	0.0287604	0.0632611	0.0463367	0.0457303	0.0348456	0.0530169	0.0385466	0.0546309	0.0241142
868	C	0.0360274	0.0538949	0.0428714	0.026241	0.0235717	0.0185391	0.0381131	0.0550927	0.0438384	0.0482516	0.0367171	0.0415156	0.0426955	0.0607274
871	C	0.0581621	0.0399441	0.0183402	0.0673883	0.0370202	0.0160392	0.0295701	0.0526643	0.0323699	0.0343539	0.0476104	0.0524945	0.0317606	0.0582237
874	C	0.513474	0.316358	0.271087	0.08142	0.544719	0.468729	0.209508	0.156252	0.0955171	0.0660379	0.193087	0.186838	0.396603	0.212211
877	C	0.0920205	0.107592	0.0537119	0.0430385	0.0949352	0.0750662	0.0462488	0.0509991	0.0336921	0.0310327	0.0419136	0.0513205	0.0860777	0.07304
880	C	0.0284828	0.0356876	0.0445567	0.0241646	0.0253398	0.0115084	0.0284135	0.041139	0.0262091	0.0277427	0.0365472	0.0331788	0.0249423	0.0508255
883	C	0.0604321	0.0433719	0.0213447	0.046281	0.0331514	0.0220313	0.0652533	0.0667439	0.0431042	0.0692568	0.06258	0.0406492	0.0302728	0.0437658
888	C	0.0341478	0.0436515	0.033236	0.0394089	0.0251572	0.0151248	0.048191	0.0368526	0.0140129	0.0382491	0.0178236	0.0236364	0.0443951	0.03136
889	C	0.0244333	0.0226099	0.0331048	0.0347849	0.00885099	0.0175727	0.0395262	0.0412348	0.0259018	0.0392577	0.0479187	0.0493367	0.0309221	0.0510226
[truncated: 1,380 more rows]

## Sheet: C>G
28s location	forward strand reference base	WT NaBH4 2-NH2-d-ATP HIV	75% WT NaBH4 2-NH2-d-ATP HIV	50% WT NaBH4 2-NH2-d-ATP HIV	25% WT NaBH4 2-NH2-d-ATP HIV	WT untreated 2-NH2-d-ATP HIV	WT untreated dNTPs HIV	WT NaBH4 d2-NH2-d-ATP SSIV	75% WT NaBH4 dNH2-ATP SSIV	50% WT NaBH4 2-NH2-d-ATP SSIV	25% WT NaBH4 2-NH2-d-ATP SSIV	WT untreated 2-NH2-d-ATP SSIV	WT untreated dNTPs SSIV	WT NaBH4 dNTPs HIV	WT NaBH4 dNTPs SSIV
[truncated: 1,692 more rows]

[truncated: 7 more sheets: C>T, G>A, G>C, G>T, T>A, T>C, T>G]
