# Supplementary material
Source: HighWire-hosted journal article supplement (doi:10.1101/rna.079863.123)
Supplement: Supplemental_Table6.xlsx [file Supplemental_Table6.xlsx]

## Sheet: Sheet1
HeLa RNA	treatment	dNTP	Total reads	Reads mapped to 18srRNA (min mapq 0)	Mapping rate (min mapq 0)
wildtype	HCl	2-amino-dATP	104875	104875	1
NAT10-/-	NaCNBH3	2-amino-dATP	120760	120760	1
wildtype	NaCNBH3	dNTPs	119371	119371	1
wildtype	NaCNBH3	2-amino-dATP	118960	118960	1
