# Supplementary material
Source: HighWire-hosted journal article supplement (doi:10.1101/rna.079863.123)
Supplement: Supplemental_Table7.xlsx [file Supplemental_Table7.xlsx]

## Sheet: Sheet1
Sequences 5' -> 3'	Purposes
CCTGCGGCTTAATTTGACTC	Amplification 18S rRNA from human helix34, sequencing helix34
GAACGCCACTTGTCCCTCTA	Amplification 18S rRNA from human helix34
CGCTACTACCGATTGGATGG	Amplification 18S rRNA from human heli45, sequencing helix45
TAATGATCCTTCCGCAGGTTCACC	Amplification 18S rRNA from human helix45
ACACCAACTCCTAACCCTACTAAA	Reverse primer for primer extension experiment
TAATCCTTTACTAACACCAACTCCTAACCCTACTAAAACCCTCTAATCCTCTATACCCACCTCCACAATCCATGCTCTCTACTCTATTCAACTCCCTCTATAAACTACTCTCTCTCCCTATAGTGAGTCGTATTA	Template for in vitro transcription of reporter RNA used in primer extension experiment
GGGAGAGAGAGUAGUUUAUAGAGGGAGUUGAAUAGAGUAGAGAGCAUGGAUUGUGGAGGUGGGUAUAGAGGAUUAGAGGGUUUUAGUAGGGUUAGGAGUUGGUGUUAGUAAAGGAUUA	RNA used in primer extension experiment
ACTTGCCTGTCGCTCTATCTTCTAATGATCCTTCCGCAGGTTCACC	RT primer for Nanopore-PCR sequencing of 18S rRNA
